# Supplementary material for: Tumor-specific retargeting of an oncogenic transcription factor chimera results in dysregulation of chromatin and transcription
Source: HighWire-hosted journal article supplement (doi:10.1101/gr.125666.111), 2011-11-15

**Figure S1**

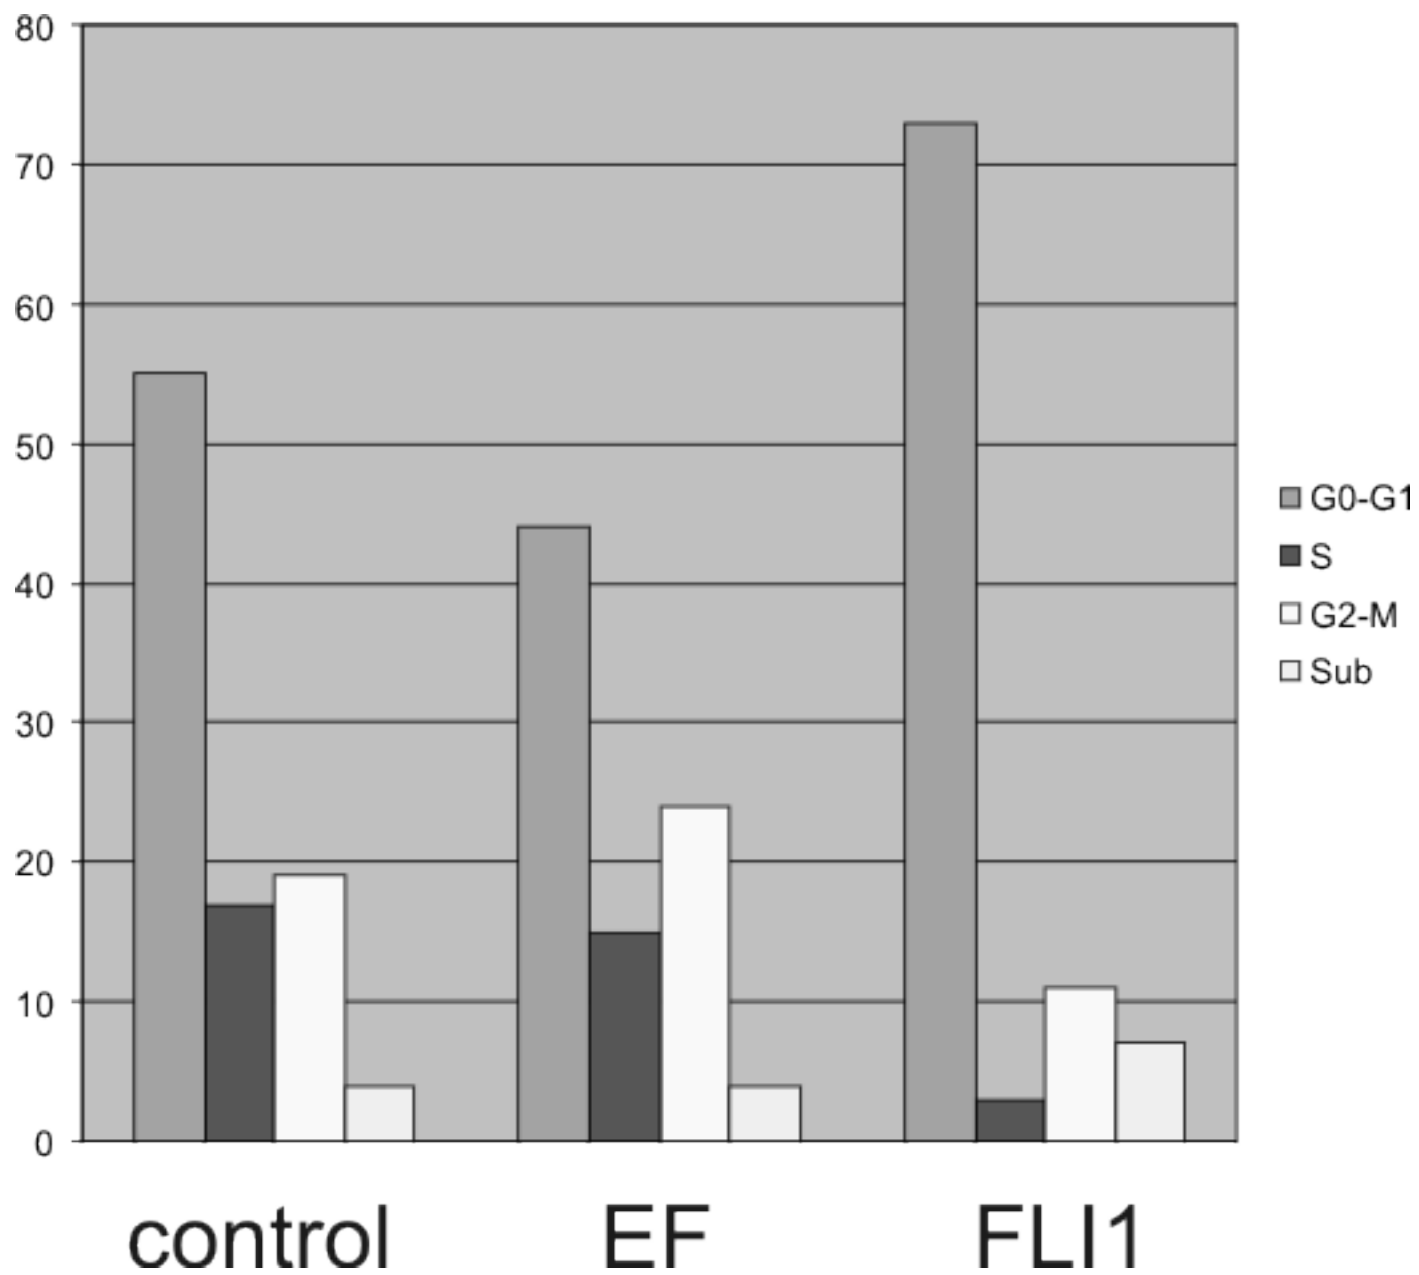

Figure S2A

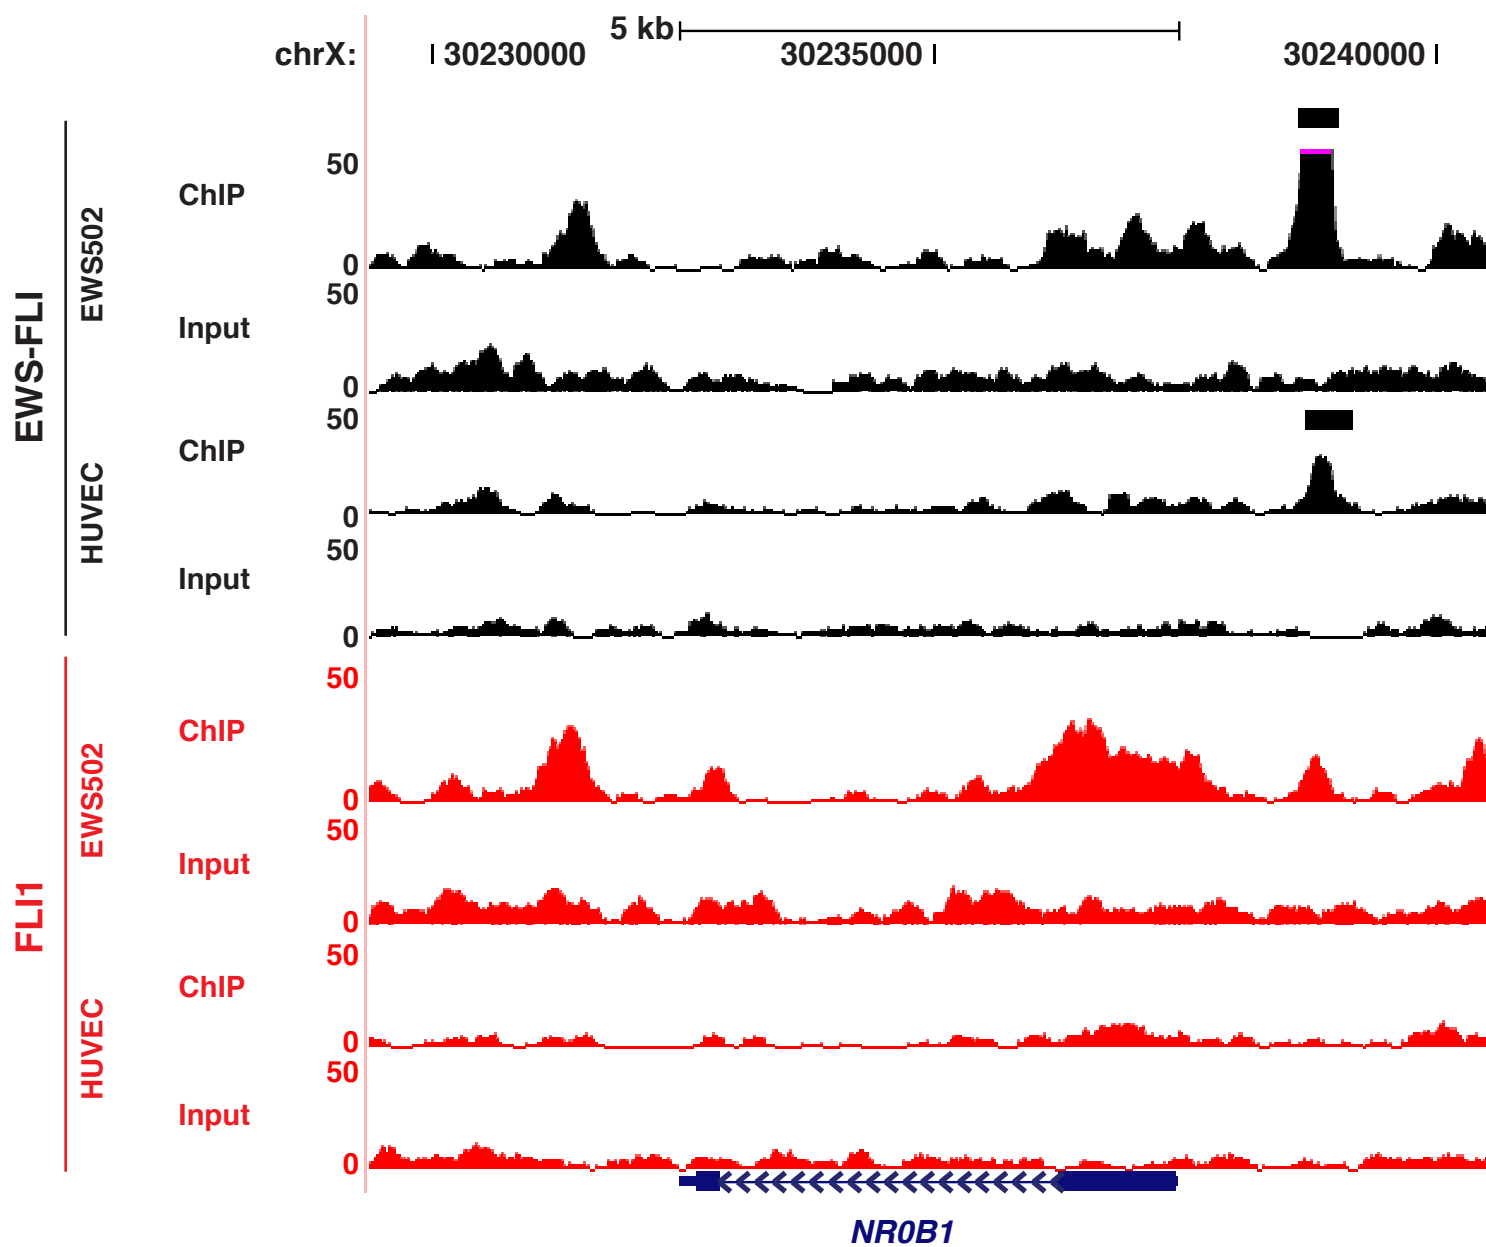

Figure S2B

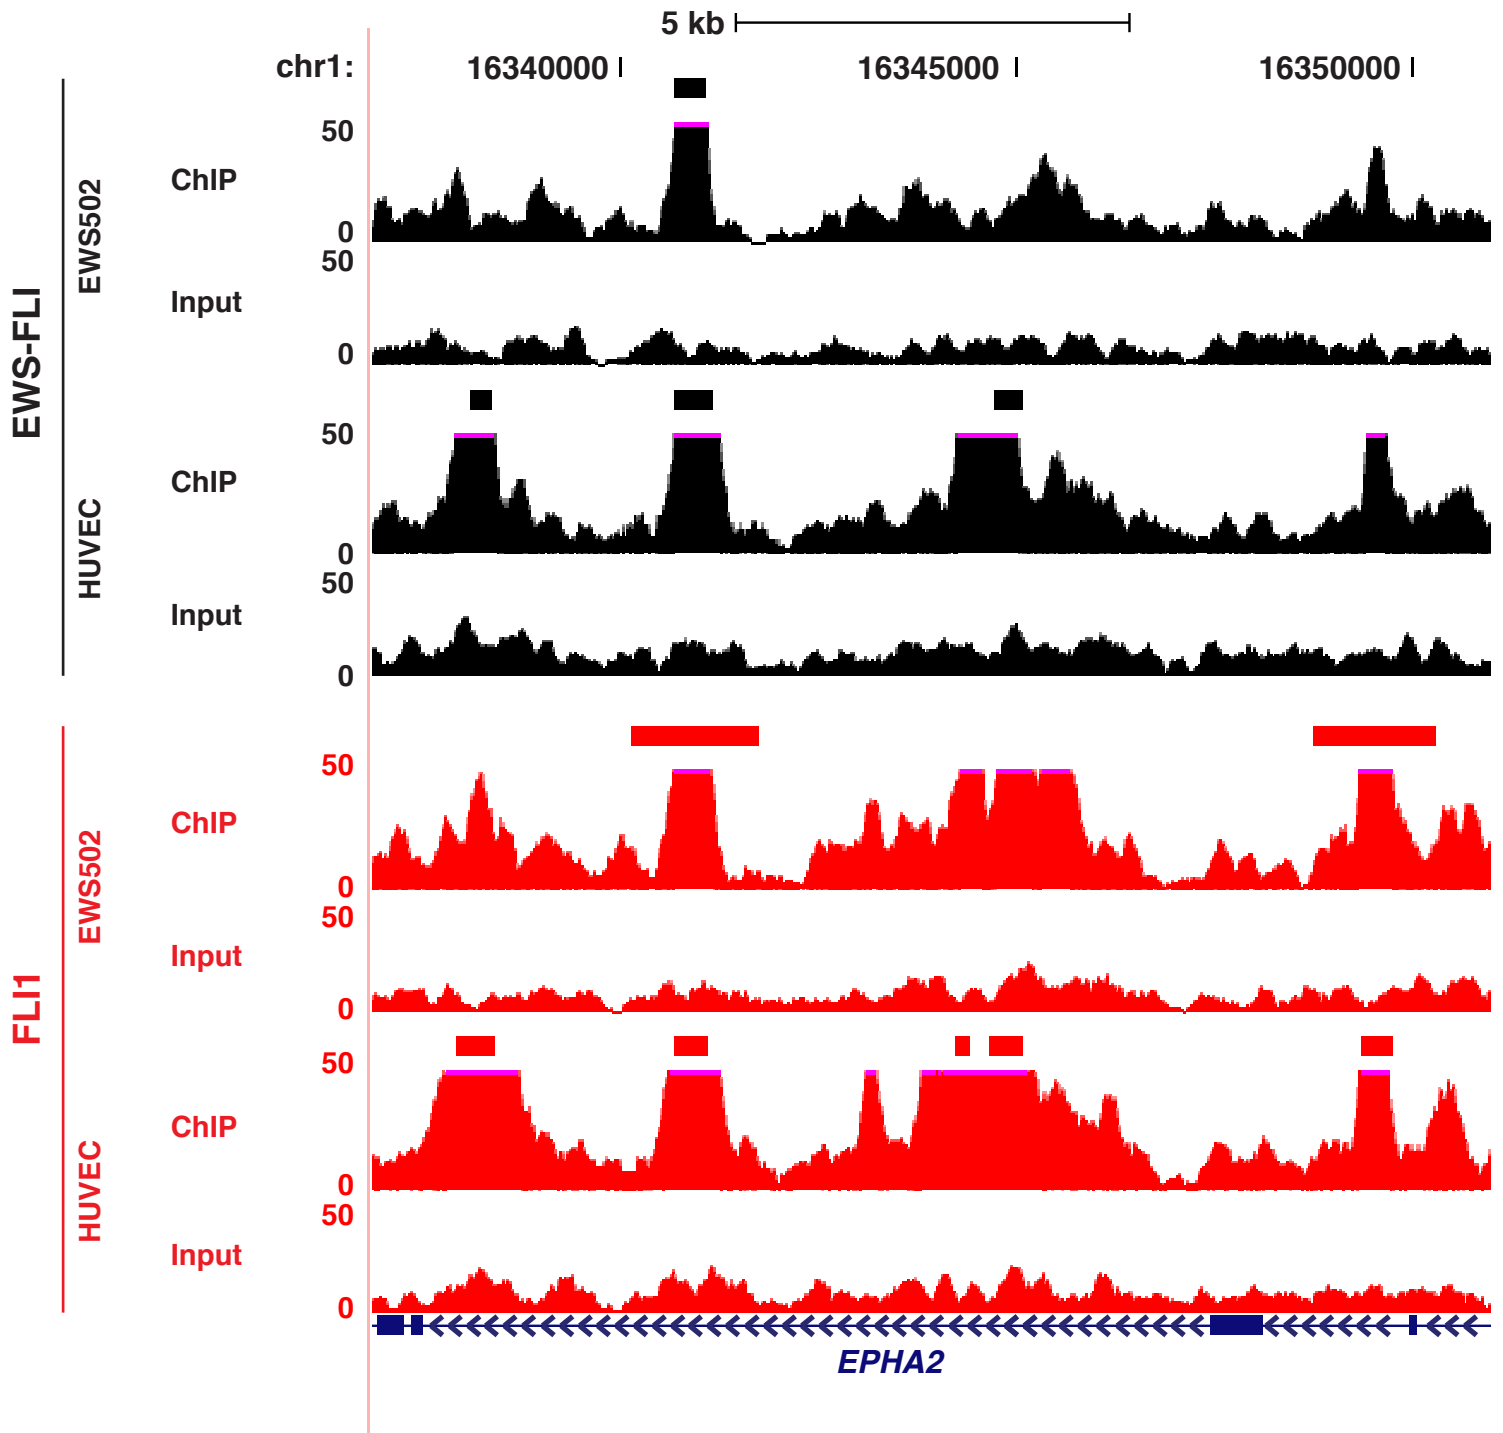

**A**

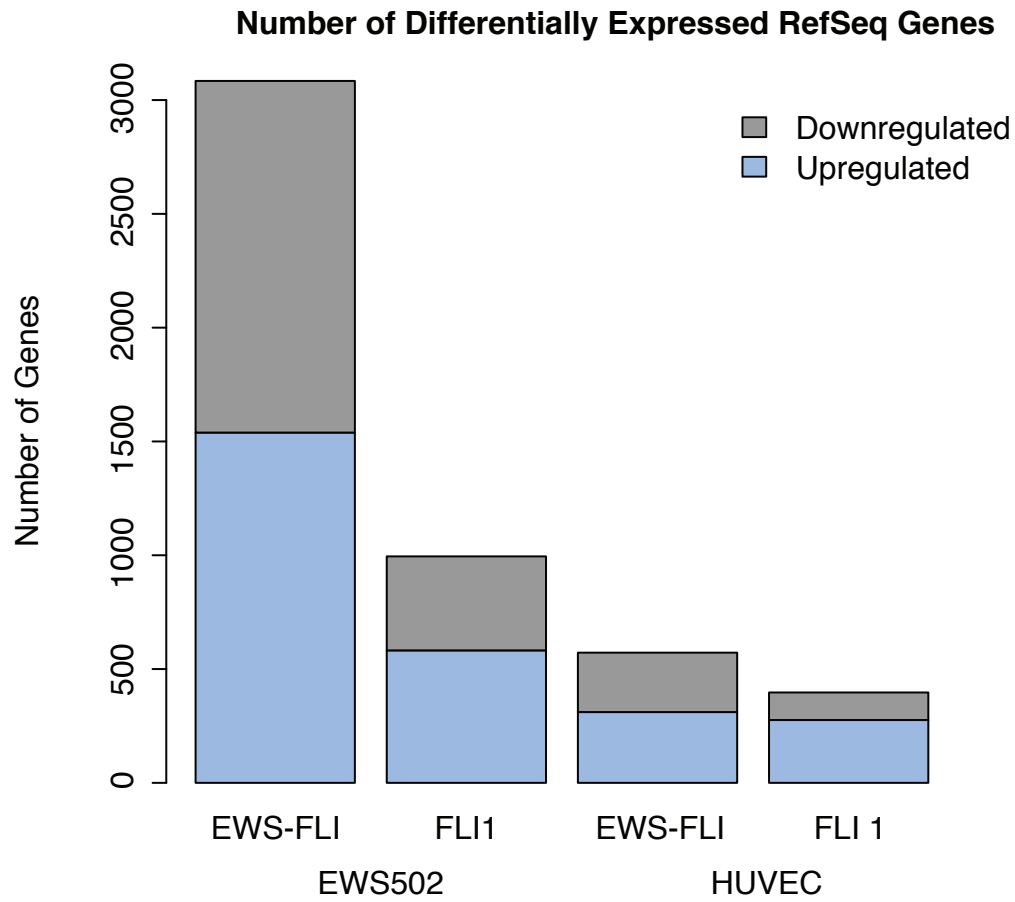

**B**

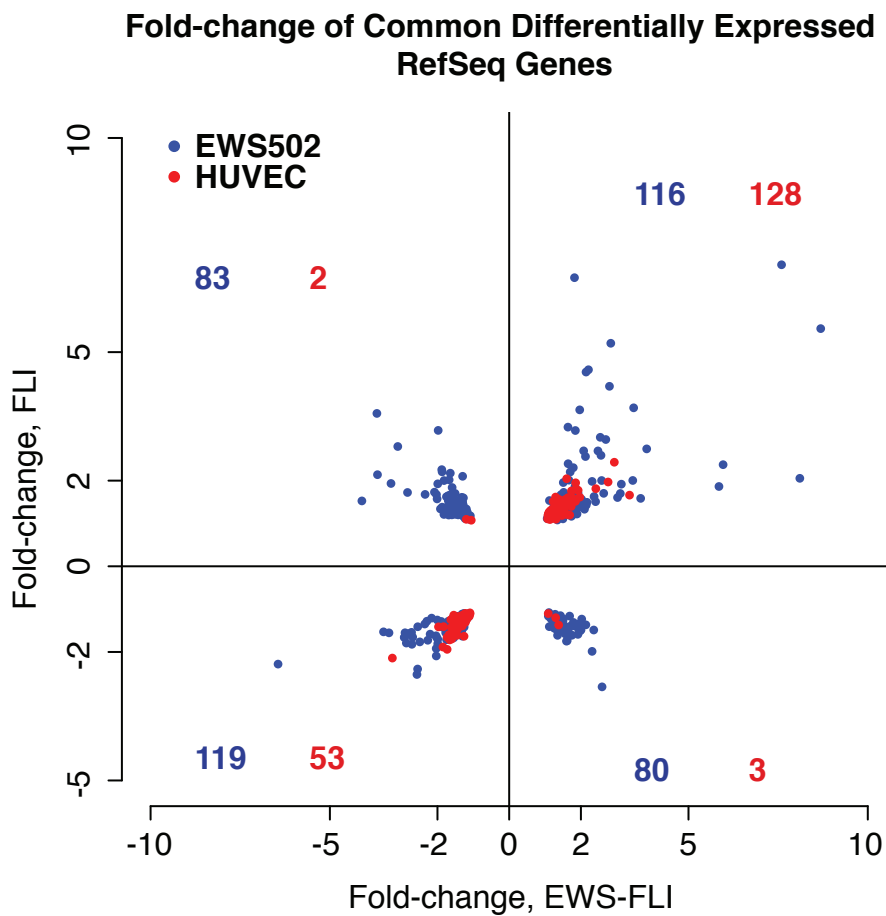

**A**

**Over-Enriched Biological Functions in EWS502**

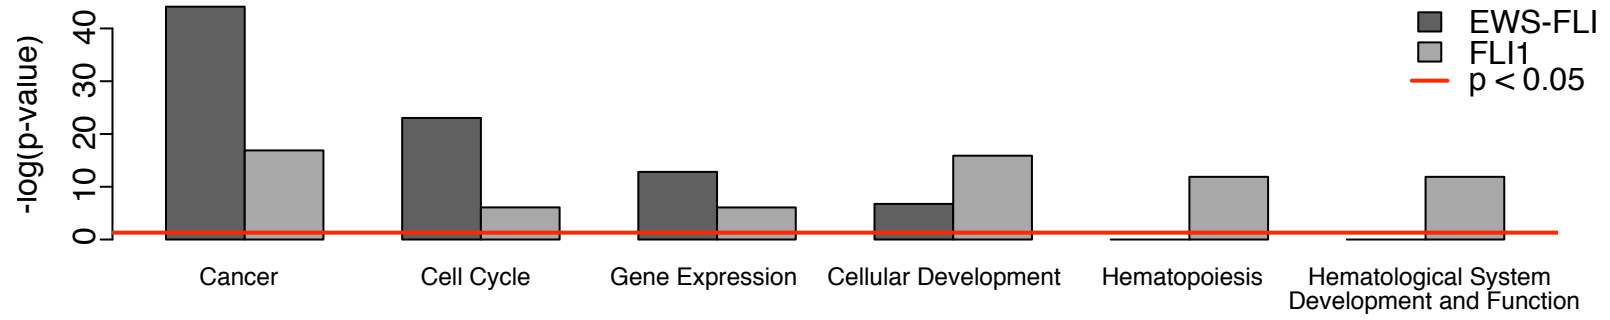

**Over-Enriched Biological Functions in HUVEC**

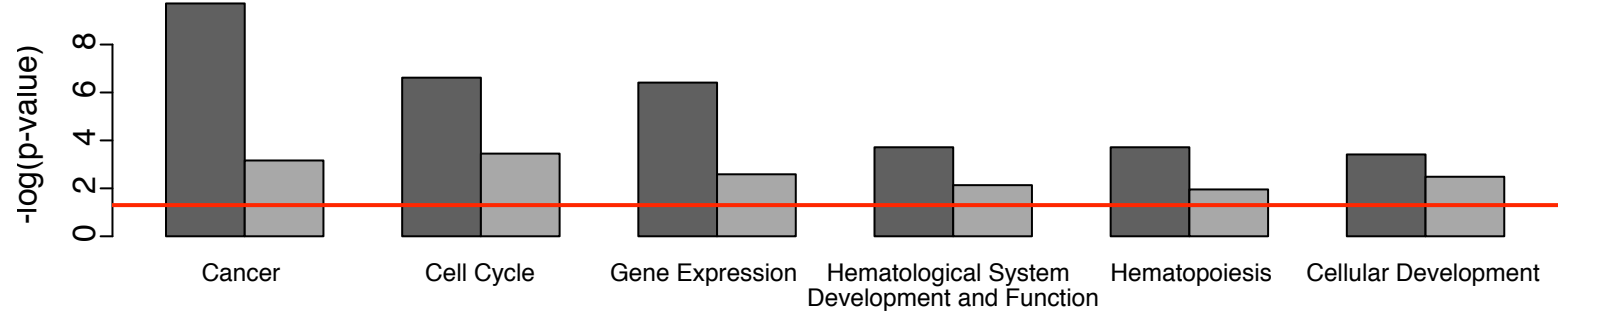

**B**

**Over-Enriched Biological Pathways in EWS502**

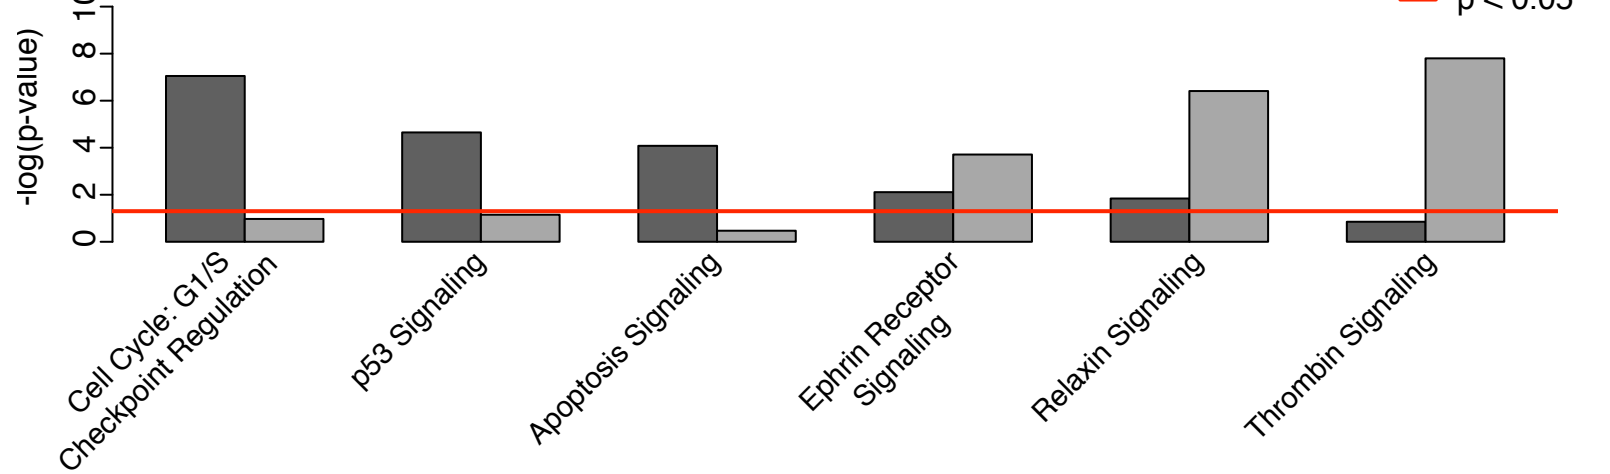

**Over-Enriched Biological Pathways in HUVEC**

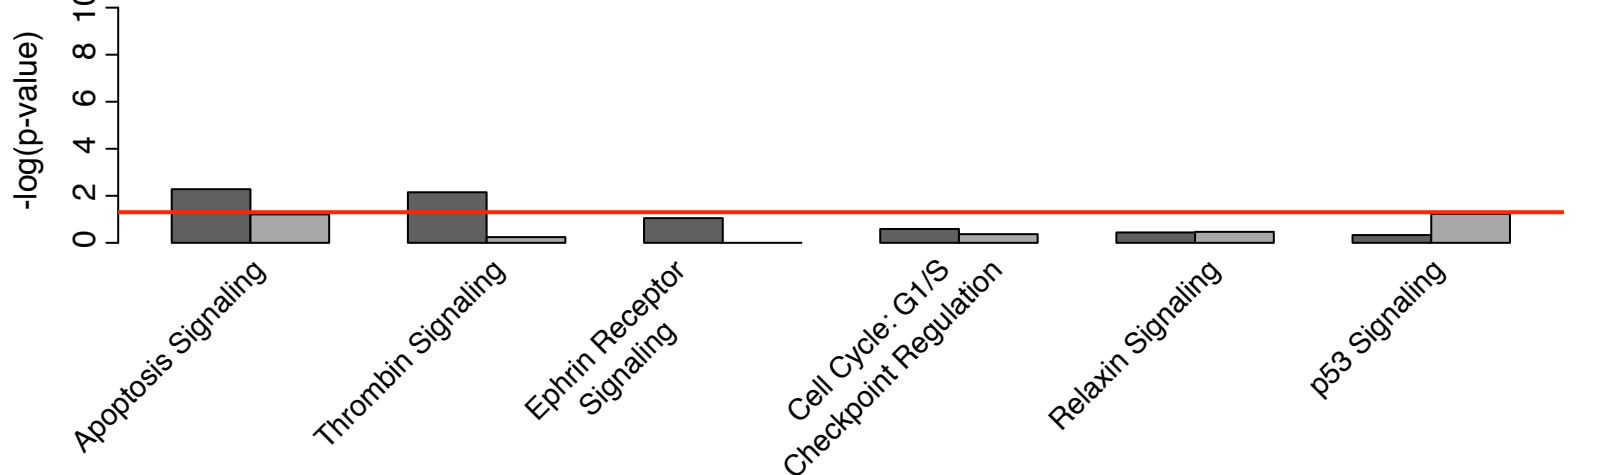

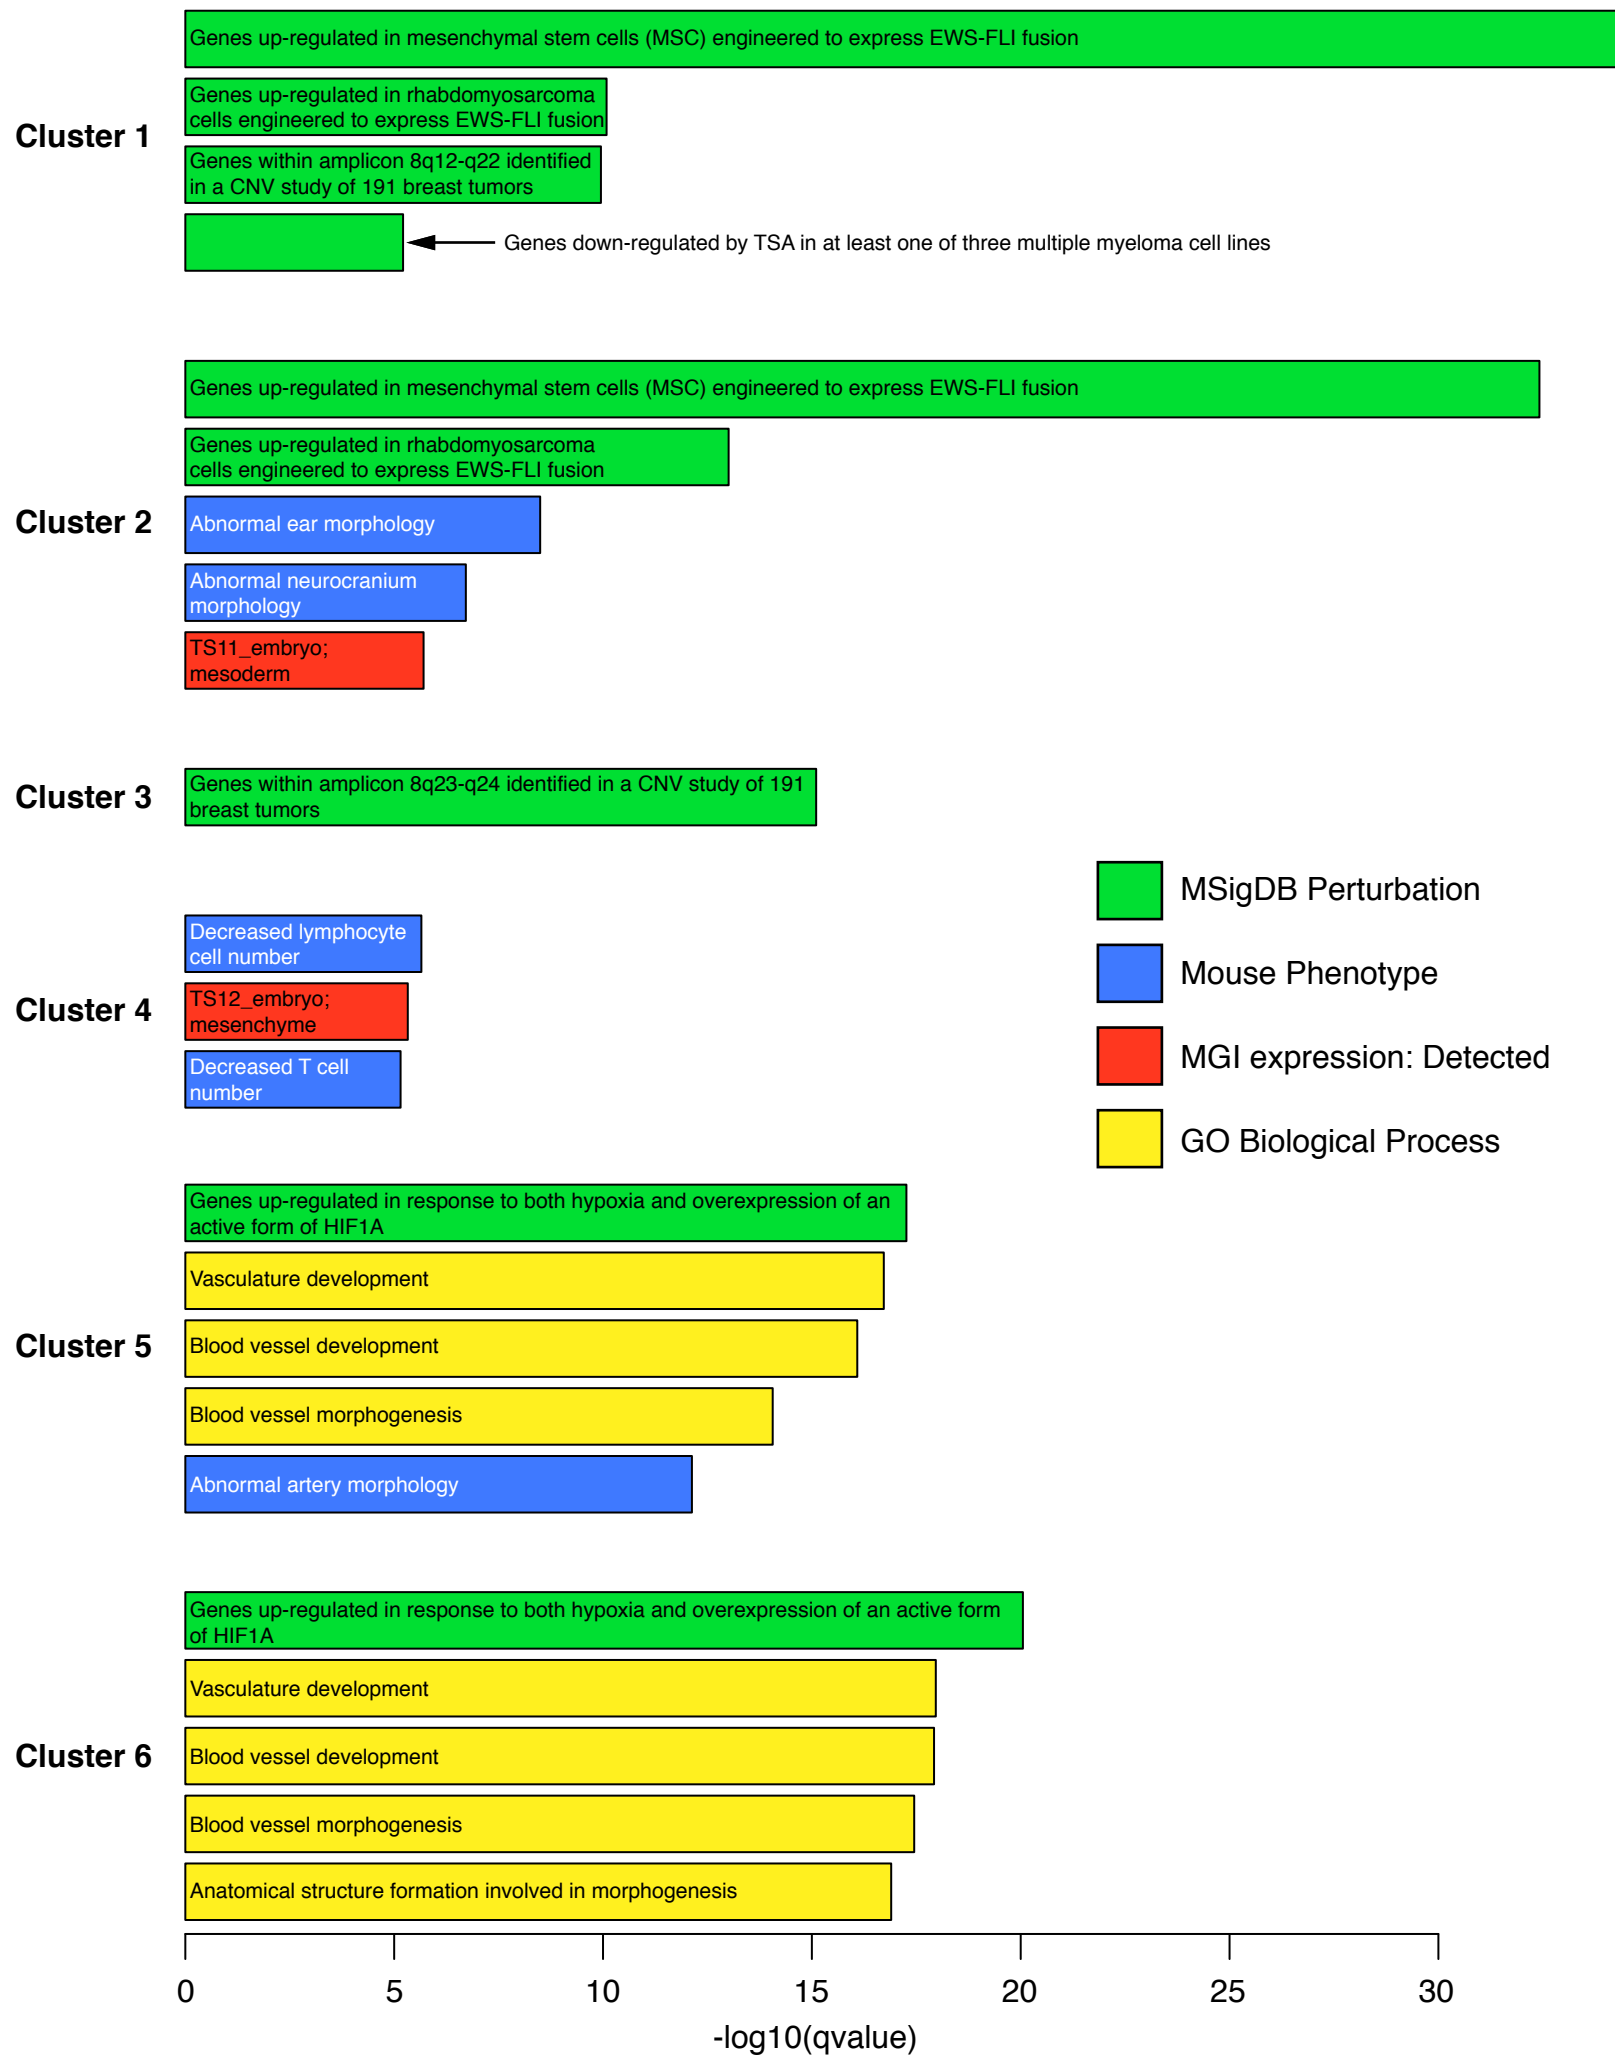

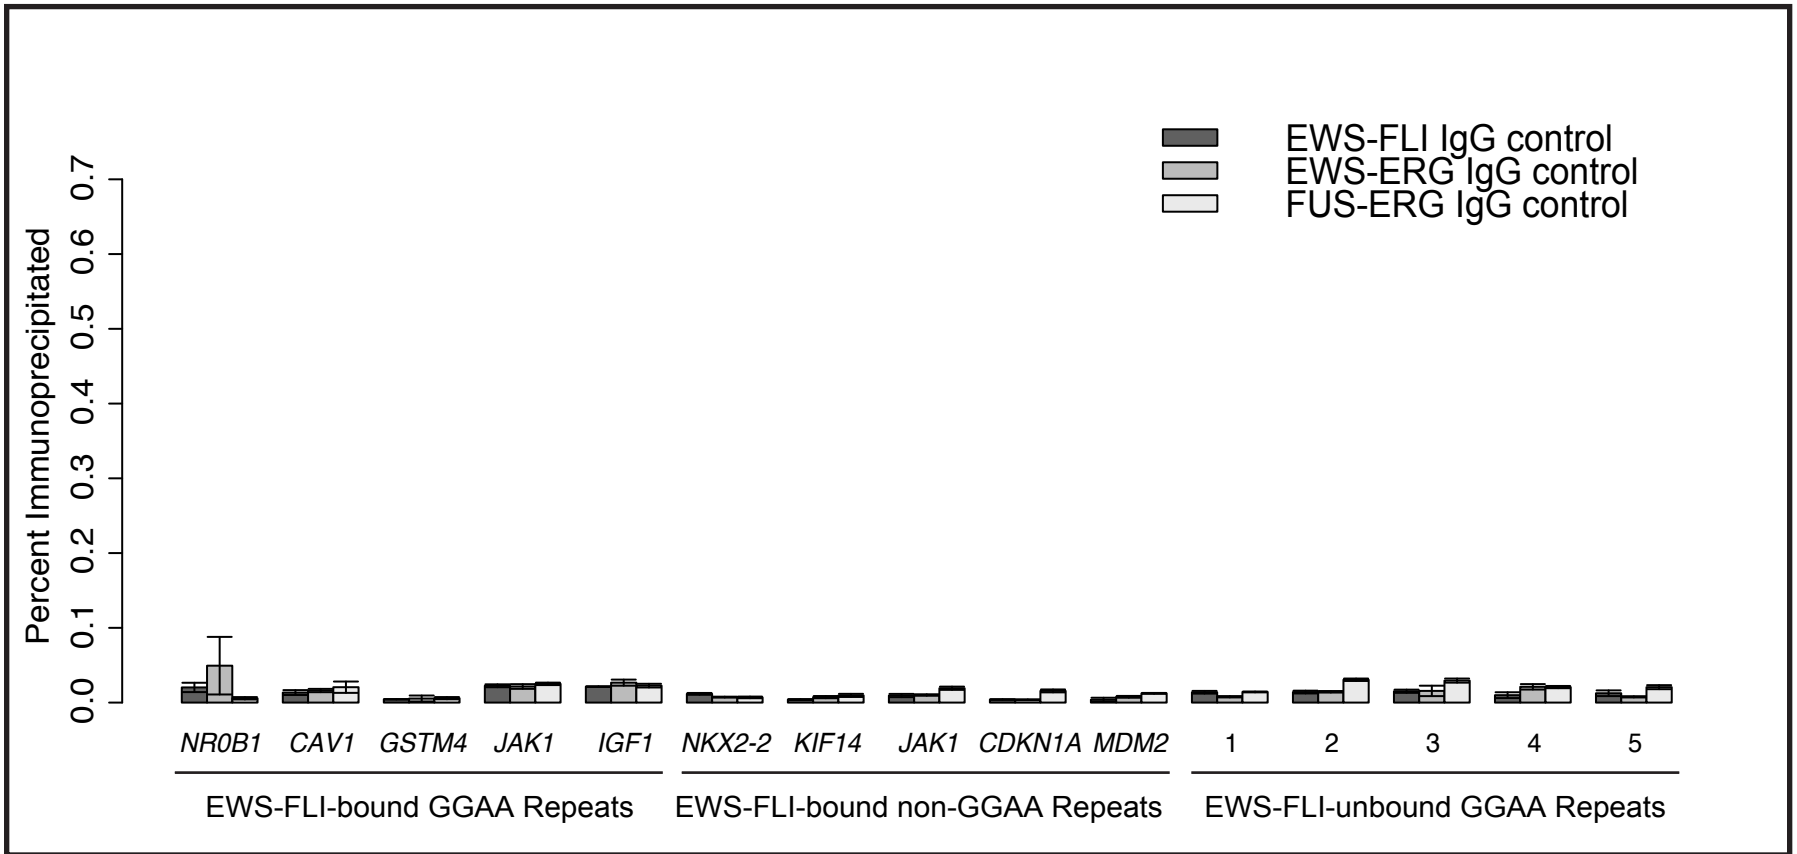

Figure S7

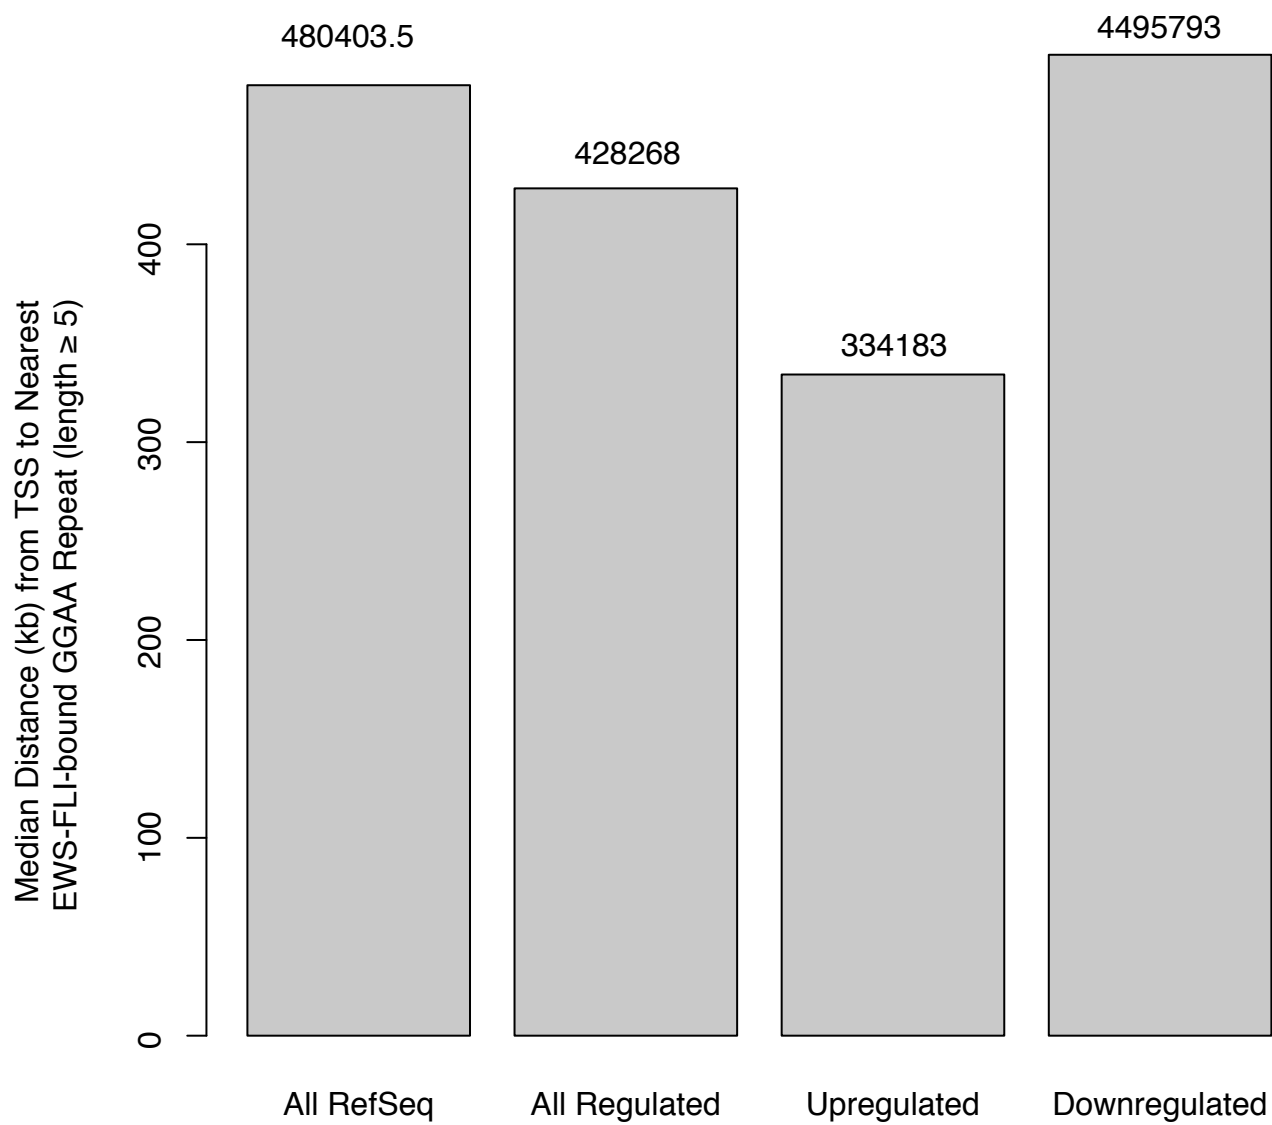



Figure S8

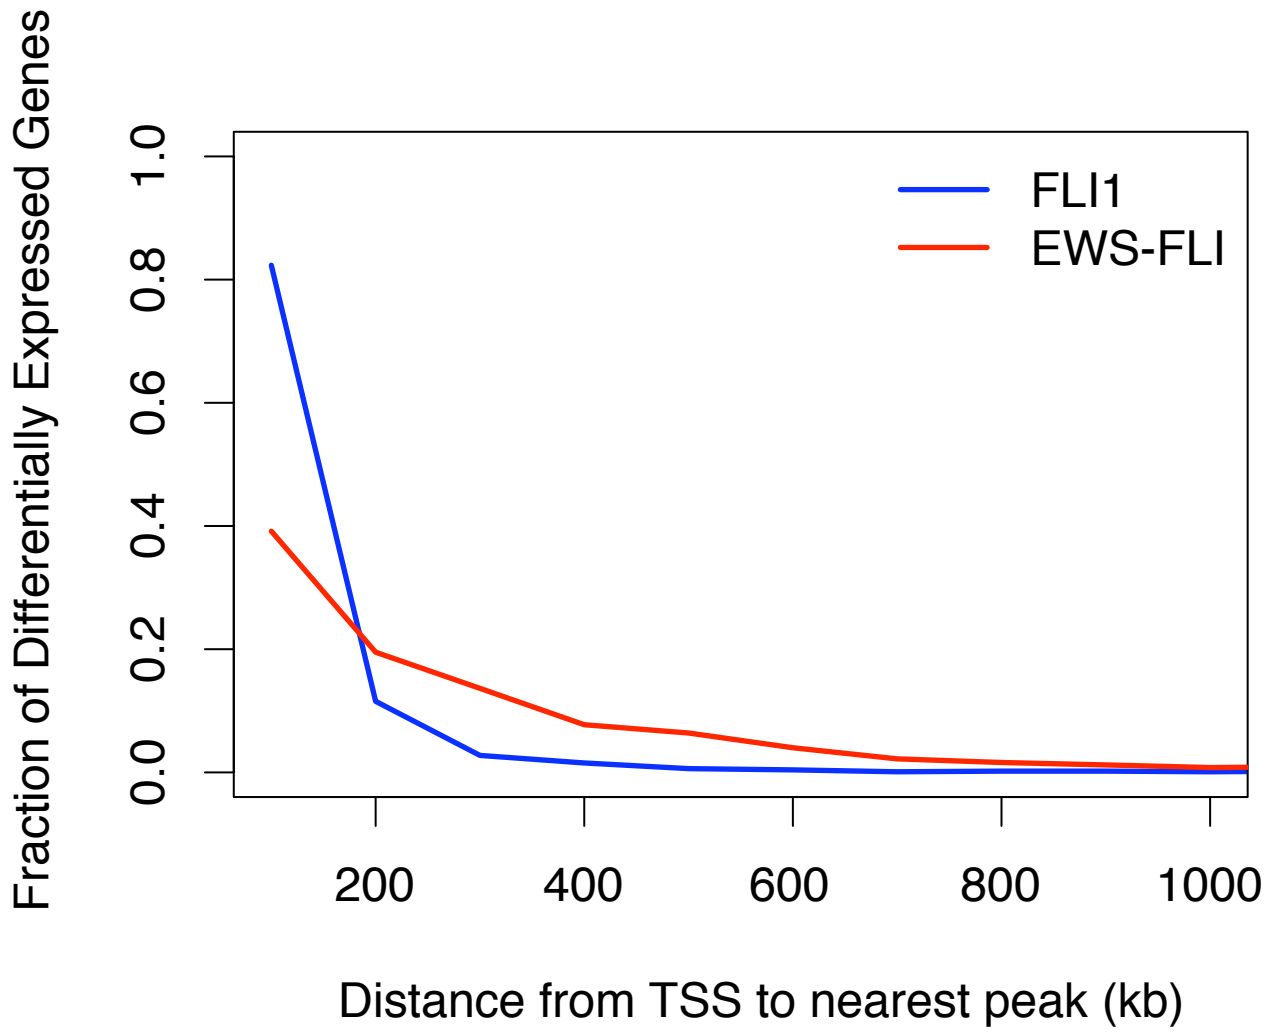



Figure S10

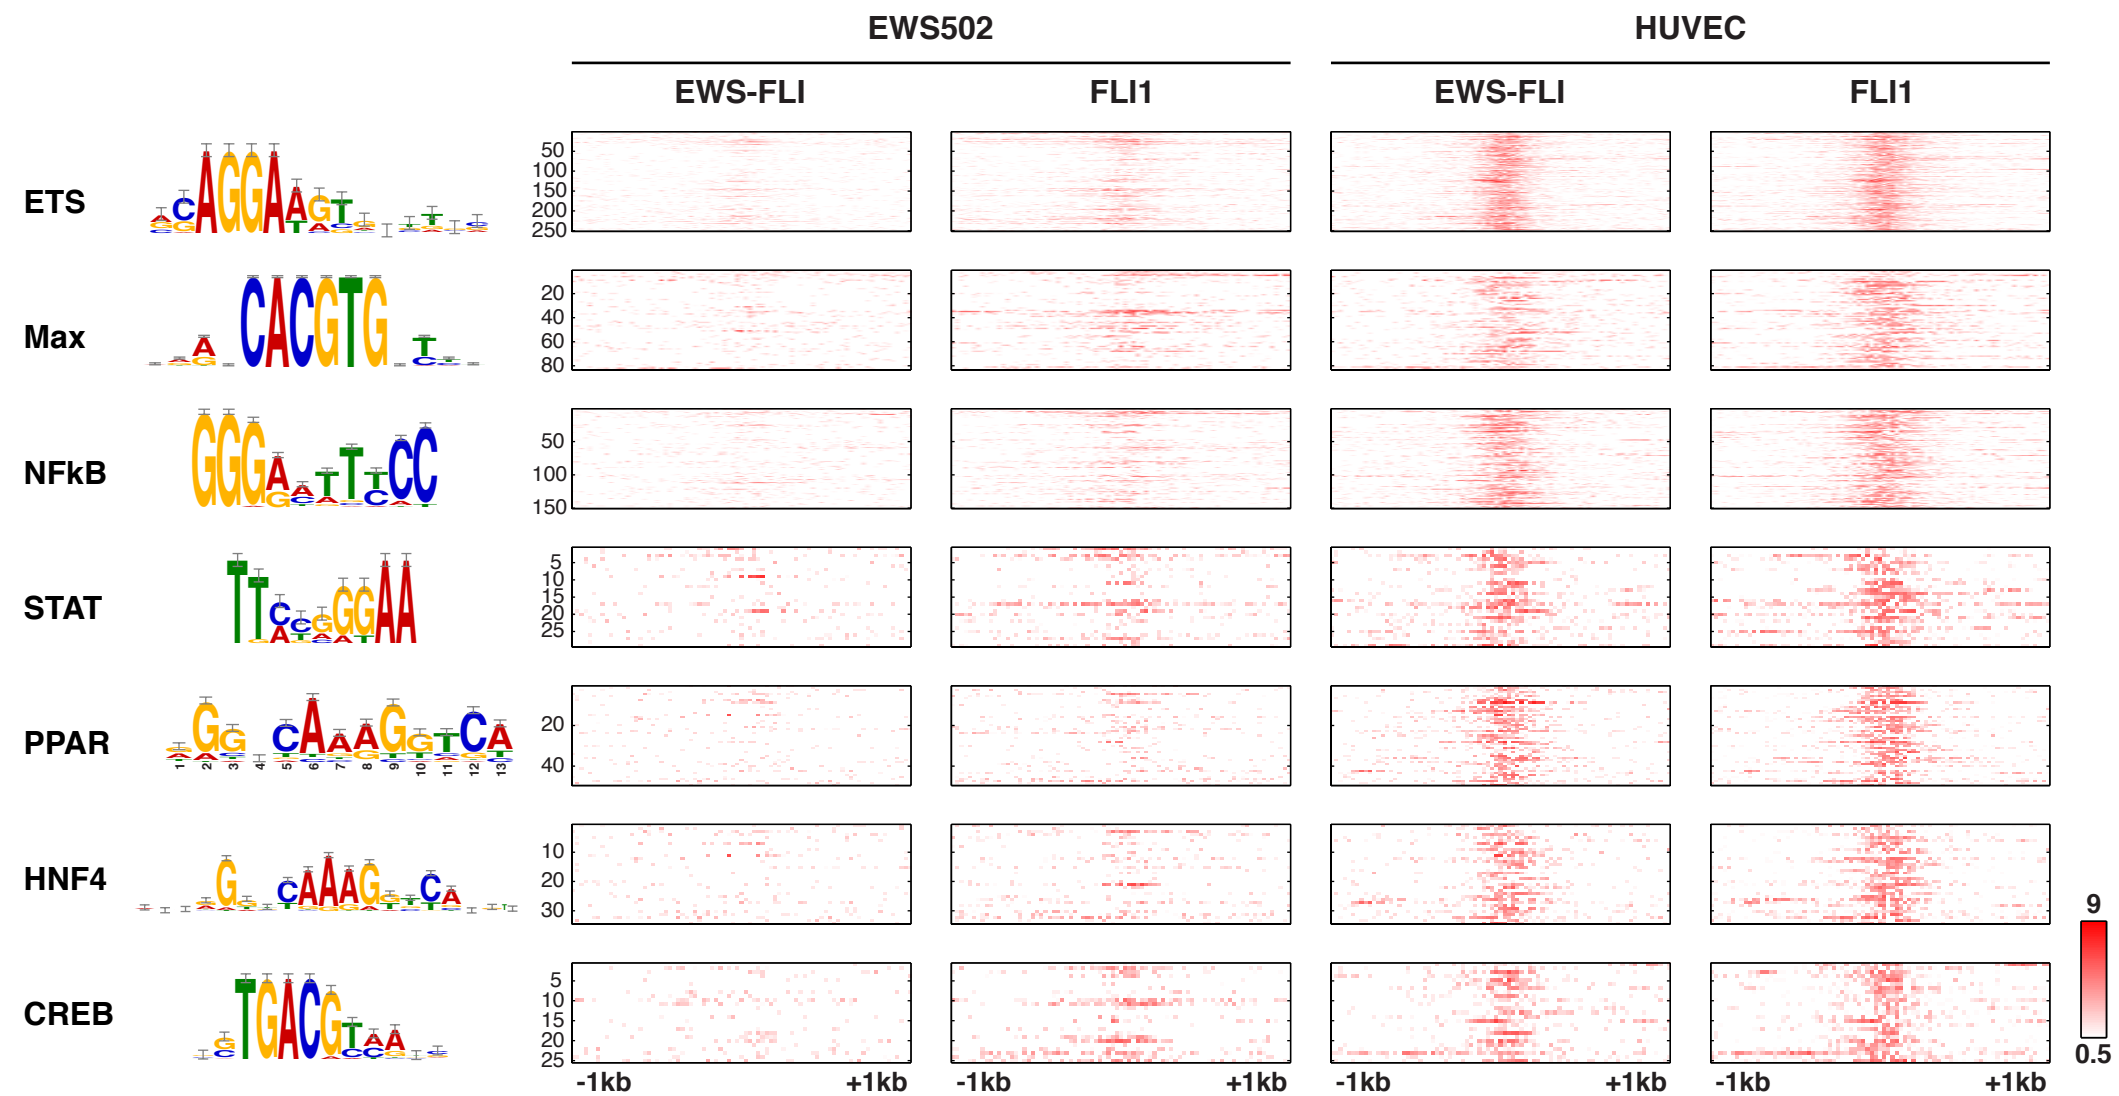

Figure S11

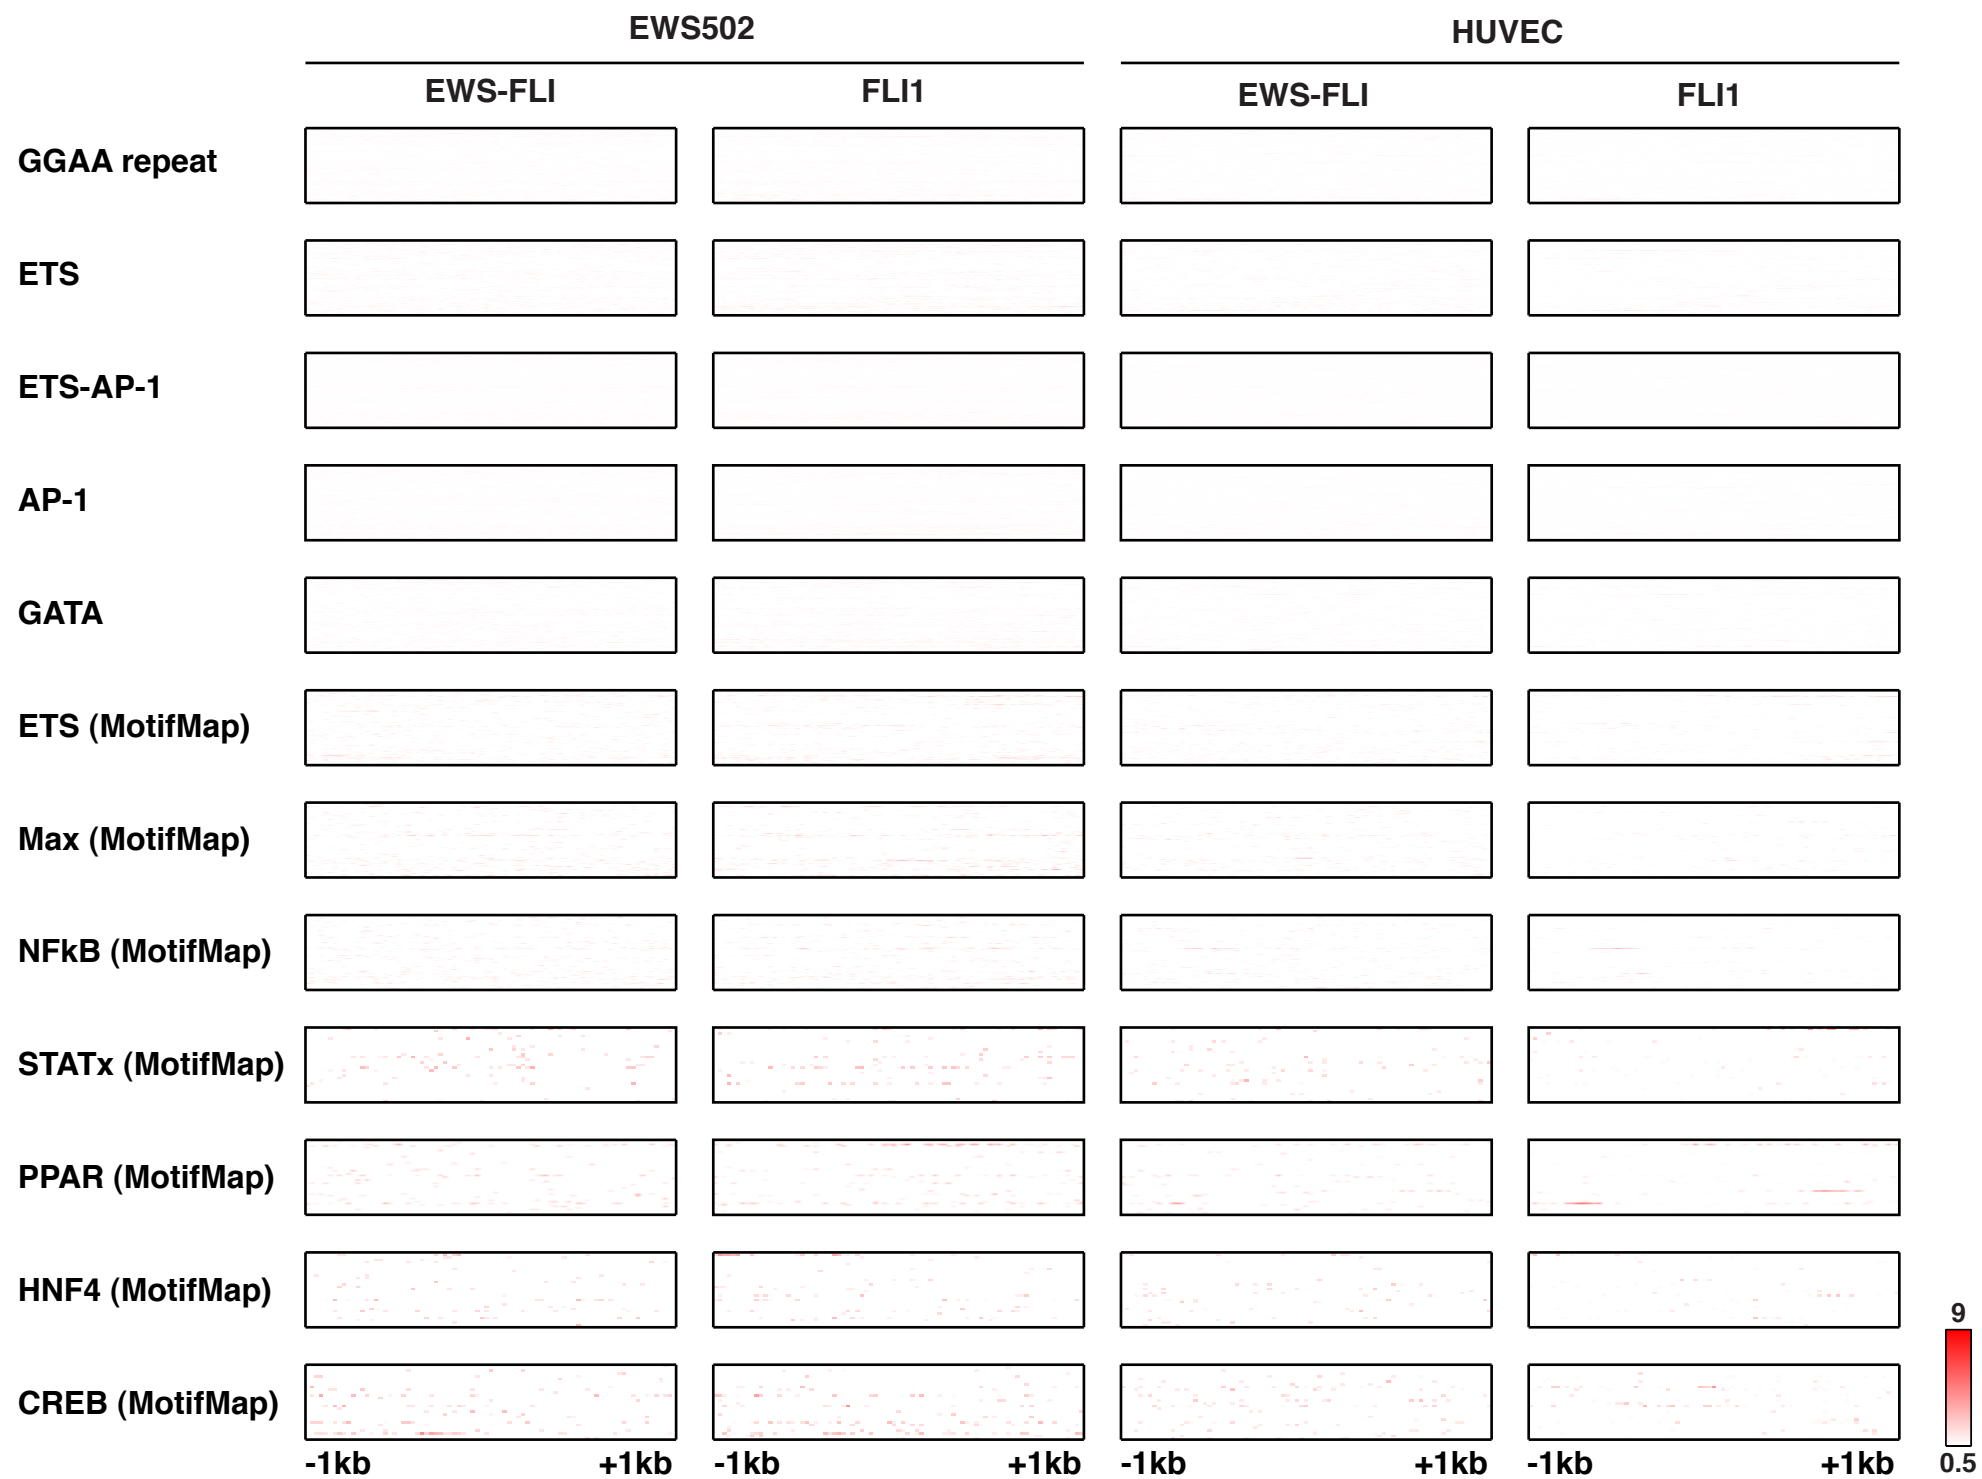

A

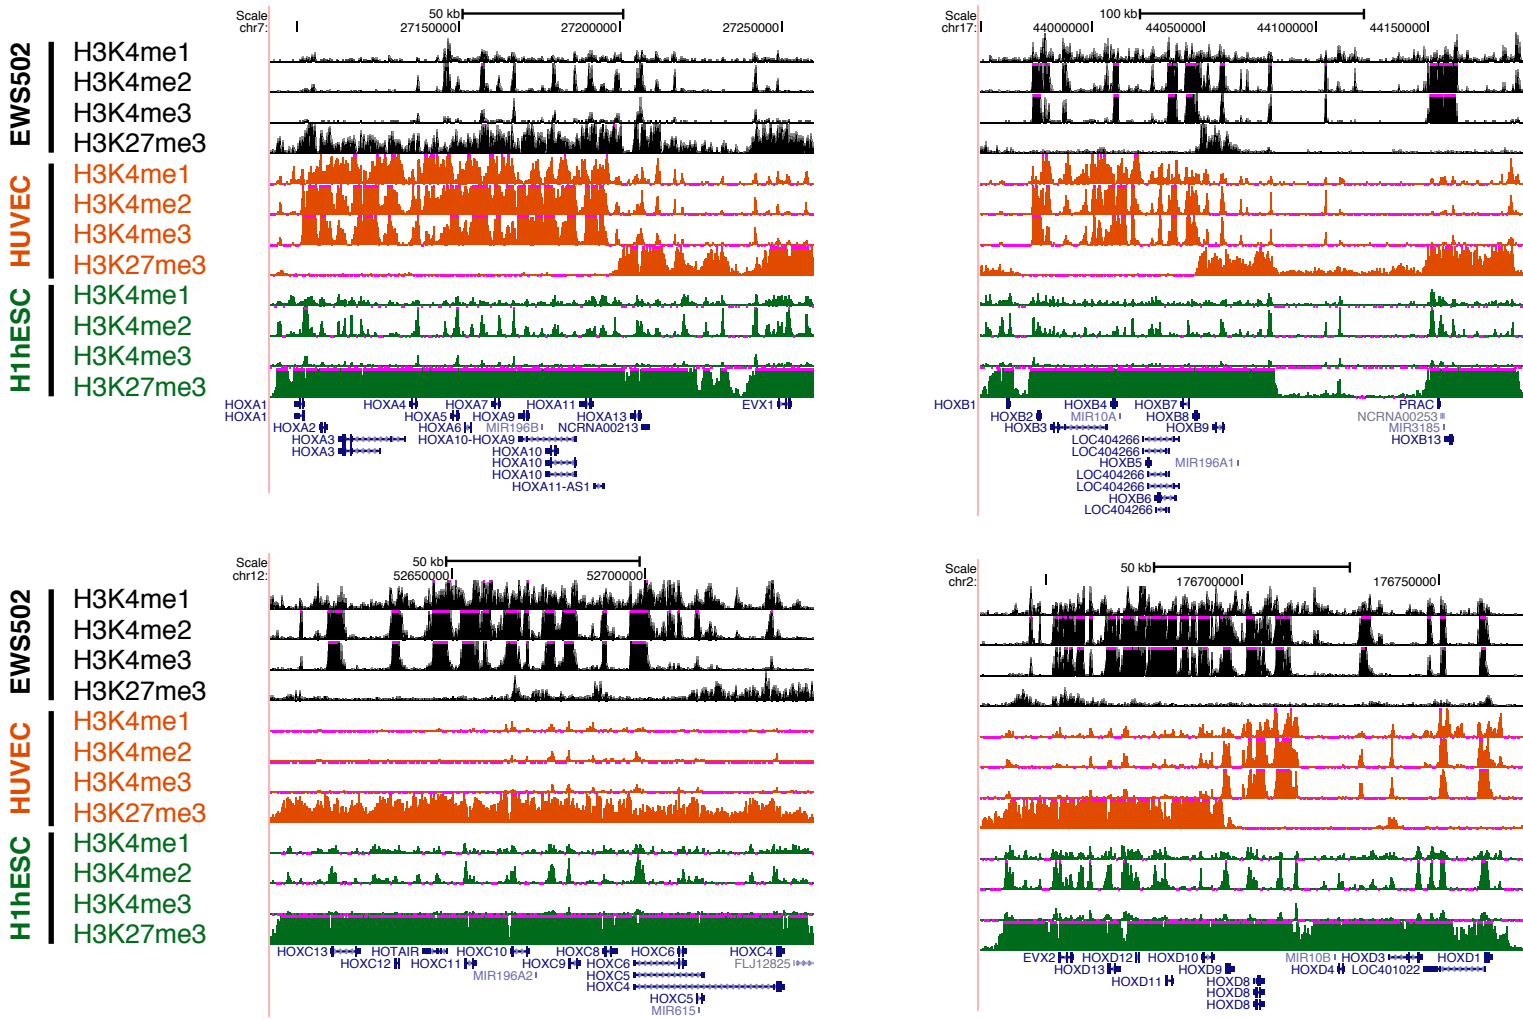

B

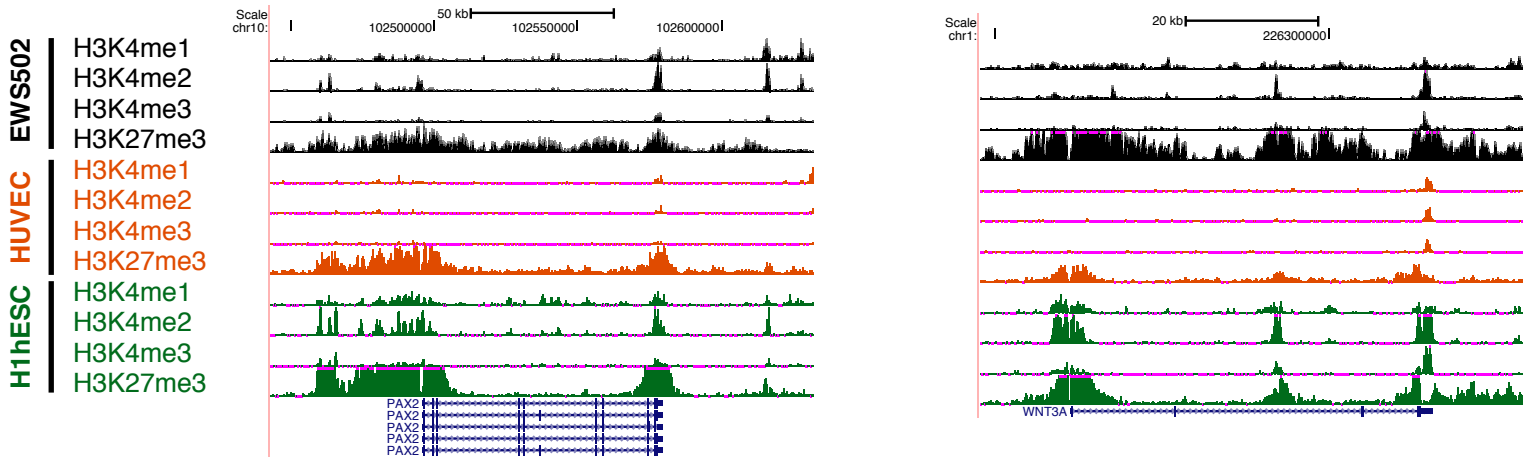

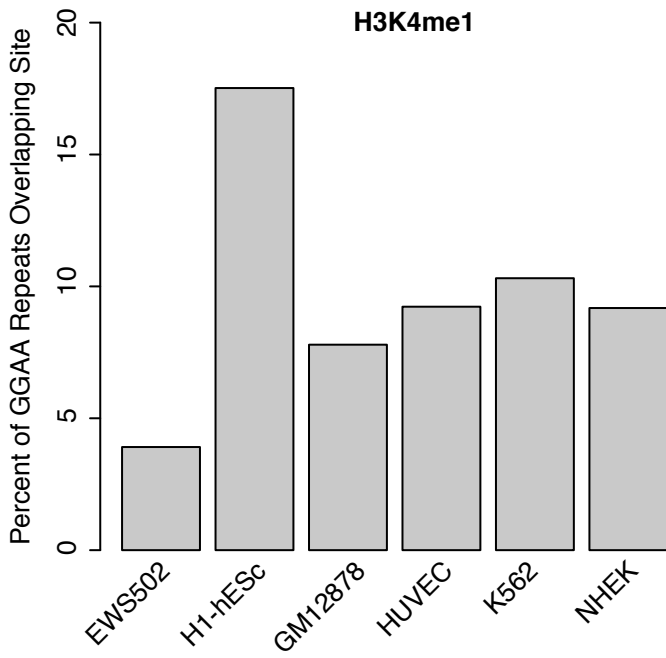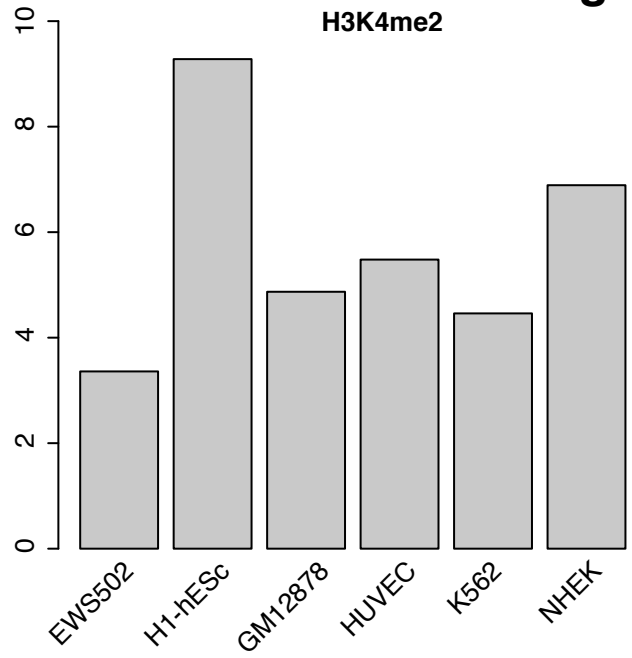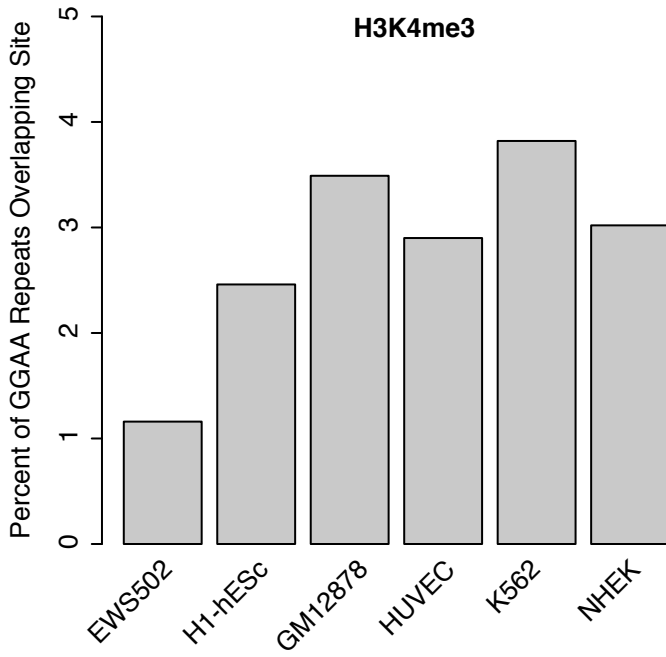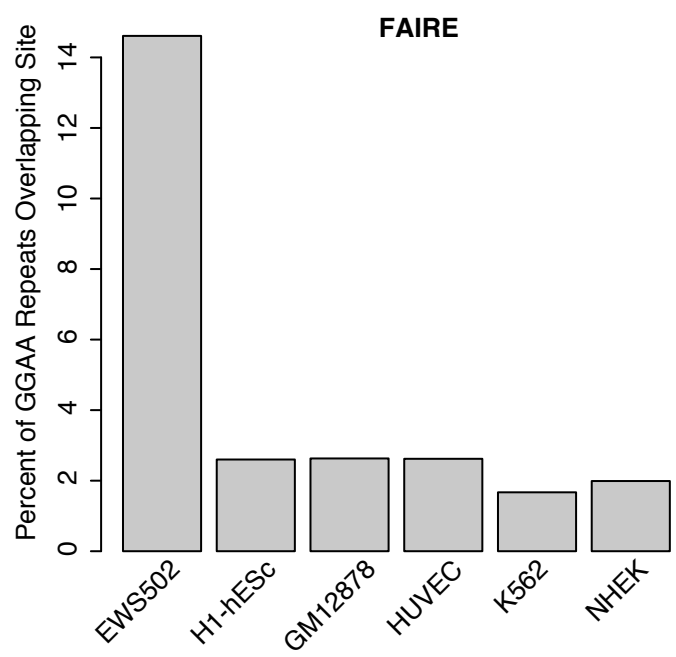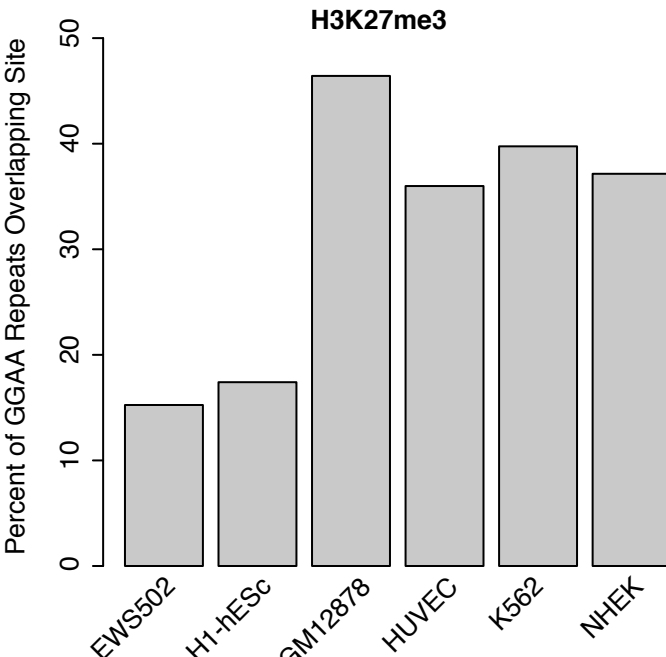

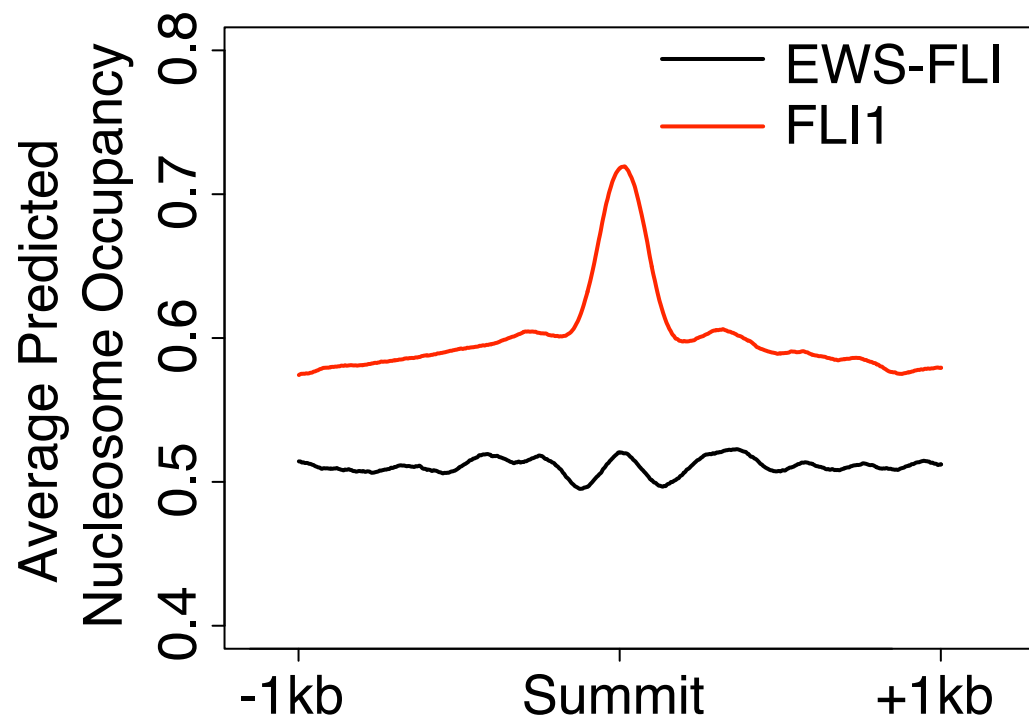

Supplement: PatelSimon_SupplementalFigures.pdf [file PatelSimon_SupplementalFigures.pdf]
