# Supplementary material for: Tumor-specific retargeting of an oncogenic transcription factor chimera results in dysregulation of chromatin and transcription
Source: HighWire-hosted journal article supplement (doi:10.1101/gr.125666.111), 2011-11-15
Supplement: PatelSimon_TableS1.xlsx [file PatelSimon_TableS1.xlsx]

## Sheet: Sheet1
Cell Line	Silenced factor	Lentivirally-induced factor	Experiment	Number of Raw Sequencing Reads	Approximate Basecall Error Rate	Number of Uniquely Aligned Filtered Reads	Number of Peaks Called	Cross-replicate Correlation
EWS502
	EWS-FLI	EWS-FLI					7172	0.771
			ChIP	54480242	0.0002	36289132
			Input	62282197	0.0002	45022601
	EWS-FLI	FLI1					18958	0.568
			ChIP	57674614	0.0002	38985019
			Input	59521071	0.0002	43331869
	EWS-FLI	EWSR1					5578	0.542
			ChIP	46933525	0.0002	30111743
			Input	58218919	0.0002	42117244
HUVEC
	FLI1	EWS-FLI					13878	0.824
			ChIP	50258880	0.0002	35641058
			Input	54953741	0.0002	40648236
	FLI1	FLI1					39439	0.856
			ChIP	50385544	0.0002	36691220
			Input	61156006	0.0002	45623731
	FLI1	EWSR1					149	0.757
			ChIP	47558553	0.0002	32502297
			Input	51471708	0.0002	38257986
Cell Line	Chromatin Assay	Experiment	Number of Raw Sequencing Reads	Approximate Basecall Error Rate	Number of Uniquely Aligned Filtered Reads	Number of Peaks Called	Cross-replicate Correlation
EWS502
	H3K4me1					117572
		ChIP	33146591	0.0001	21484473		NA
	H3K4me2					90470
		ChIP	33717869	0.0001	23267093		NA
	H3K4me3					31749
		ChIP	34281108	0.0001	25890956		NA
	H3K27me3					44406
		ChIP	32050624	0.0002	23442514		NA
		Input	38600867	0.0002	28882634
	FAIRE					222167	0.64
		FAIRE	234511415	0.0002	89743106
Patel and Simon Supplementary Table 1. Summary of sequencing quality.
