# Supplementary material for: Tumor-specific retargeting of an oncogenic transcription factor chimera results in dysregulation of chromatin and transcription
Source: HighWire-hosted journal article supplement (doi:10.1101/gr.125666.111), 2011-11-15
Supplement: PatelSimon_TableS2.xlsx [file PatelSimon_TableS2.xlsx]

## Sheet: Legend
Patel and Simon Supplementary Table 2. Binding Sites for EWS-FLI and FLI1 in EWS502 and HUVEC
Experiment Name	Cell Line	Silenced Factor	Expressed Factor
EWS502 EWS-FLI	EWS502	EWS-FLI	EWS-FLI
EWS502 FLI1	EWS502	EWS-FLI	FLI1
HUVEC EWS-FLI	HUVEC	FLI1	EWS-FLI
HUVEC FLI1	HUVEC	FLI1	FLI1

## Sheet: EWS502 EWS-FLI
chr10	159446	159692
chr10	168682	169113
chr10	362288	362681
chr10	811902	812151
chr10	1541000	1541813
chr10	1738929	1739278
chr10	1879852	1880251
chr10	1923147	1923522
chr10	2051459	2051660
chr10	2175352	2176067
chr10	2210975	2211339
chr10	2634128	2634503
chr10	2701956	2702086
chr10	2889029	2889443
chr10	2981327	2982162
chr10	3271611	3272520
chr10	3315326	3315704
chr10	3360582	3361119
chr10	3423563	3424154
chr10	3456515	3457008
chr10	3487647	3488066
chr10	3651593	3652119
chr10	3791505	3792033
chr10	3792877	3793233
chr10	4724250	4724638
chr10	5073334	5073744
chr10	5605152	5605558
chr10	5684133	5684562
chr10	5686639	5687005
chr10	6168172	6168726
chr10	6170673	6171056
chr10	6301159	6301502
chr10	6361356	6361769
chr10	6389296	6389666
chr10	8378798	8379145
chr10	8427632	8428089
chr10	8564495	8564689
chr10	8595302	8595514
chr10	8607492	8607843
chr10	10995582	10996233
chr10	11736112	11736484
chr10	11744126	11744474
chr10	11745622	11746749
chr10	11762080	11762472
chr10	11880846	11881266
chr10	11896081	11896435
chr10	12172234	12172502
chr10	12301765	12302824
chr10	12623698	12624078
chr10	13068989	13069356
chr10	13439105	13439263
chr10	13960638	13961042
chr10	14491883	14492297
chr10	14698961	14699416
chr10	15467974	15468427
chr10	15942185	15942631
chr10	16824409	16825025
chr10	16945000	16945376
chr10	17111552	17111939
chr10	18465986	18466205
chr10	19246437	19246619
chr10	19308977	19309513
chr10	20260494	20261118
chr10	20262672	20262887
chr10	20343044	20343596
chr10	20372872	20373238
chr10	20475051	20475651
chr10	20490915	20491383
chr10	20557407	20557794
chr10	20738413	20738834
chr10	20772100	20772688
chr10	20933648	20934018
chr10	21454470	21455373
chr10	21752331	21752714
chr10	21773203	21773616
chr10	22586951	22587855
chr10	22591903	22592282
chr10	22928751	22929132
chr10	22946449	22946822
chr10	23485634	23486183
chr10	23778139	23778347
chr10	23804335	23804718
chr10	23847267	23847661
chr10	23869344	23869760
chr10	23986666	23986975
chr10	24663185	24663555
chr10	24719278	24719669
chr10	25458013	25458561
chr10	25572623	25572929
chr10	25836622	25836995
chr10	26053286	26053646
chr10	26073543	26073744
chr10	26095520	26096113
chr10	26177149	26177538
chr10	26584422	26584833
chr10	27004885	27005070
chr10	27571820	27572543
chr10	27676060	27676419
chr10	27775393	27775766
chr10	28015130	28015535
chr10	28644086	28644467
chr10	28821255	28821471
chr10	28823953	28824333
chr10	28826619	28826839
chr10	29046798	29047179
chr10	29068945	29069320
chr10	29141609	29142022
chr10	29454460	29454830
chr10	29531096	29531513
chr10	29532443	29532828
chr10	29570617	29571011
chr10	29583475	29583877
chr10	29759838	29760162
chr10	30178300	30178836
chr10	30236237	30236805
chr10	30257114	30257454
chr10	30312684	30312989
chr10	30402455	30402673
chr10	30782557	30783267
chr10	30804456	30804816
chr10	32468221	32468595
chr10	32569732	32570112
chr10	32581314	32581707
chr10	32729784	32730157
chr10	33353158	33353313
chr10	33525489	33525793
chr10	33642604	33642965
chr10	33690926	33691318
chr10	34061715	34062063
chr10	34246378	34246751
chr10	34259920	34260130
chr10	34965524	34965919
chr10	35109768	35110210
chr10	35242541	35242864
chr10	35251162	35251379
chr10	35350580	35350681
chr10	35598077	35598375
chr10	35924106	35924592
chr10	35981014	35981400
chr10	36050430	36050841
chr10	36158100	36158499
chr10	36200958	36201286
chr10	36288620	36289046
chr10	36322967	36323554
chr10	36540569	36540925
chr10	36596254	36596540
chr10	36963880	36964235
chr10	36965376	36965750
chr10	37054589	37055154
chr10	37138219	37138623
chr10	37433154	37433549
chr10	38186181	38186612
chr10	42834845	42835239
chr10	42860054	42860434
chr10	42909521	42909943
chr10	44465432	44465800
chr10	44729229	44729626
chr10	48184325	48184700
chr10	49898615	49898840
chr10	50525648	50526097
chr10	54500786	54501793
chr10	56127366	56127575
chr10	56507103	56507313
chr10	57359042	57359564
chr10	59609925	59610314
chr10	60672959	60673373
chr10	60861980	60862407
chr10	60892606	60892994
chr10	61811018	61811470
chr10	62197470	62197866
chr10	62272482	62273003
chr10	62429574	62430206
chr10	62602357	62602794
chr10	62781806	62782200
chr10	62820736	62821099
chr10	62907620	62908004
chr10	62921392	62921500
chr10	63329852	63330238
chr10	63519088	63519279
chr10	63625180	63625573
chr10	63873746	63874163
chr10	64046061	64046453
chr10	64122817	64123199
chr10	64158813	64159252
chr10	64335573	64335920
chr10	64407479	64407728
chr10	65057559	65058016
chr10	65071787	65071973
chr10	65120726	65121066
chr10	66039340	66039724
chr10	66719761	66720124
chr10	67437431	67437814
chr10	67695698	67696081
chr10	69249359	69249734
chr10	69548492	69548878
chr10	70051795	70052169
chr10	71080736	71081147
chr10	71365895	71366123
chr10	71417398	71417765
chr10	71470831	71471216
chr10	71761197	71761687
chr10	72832925	72833284
chr10	72855027	72855455
chr10	72866297	72866770
chr10	73698594	73698965
chr10	74457472	74457804
chr10	74618434	74618743
chr10	75685572	75686256
chr10	75729902	75730080
chr10	75868825	75869434
chr10	76132213	76132311
chr10	76499698	76500060
chr10	79307520	79307991
chr10	79543141	79543529
chr10	79567262	79567487
chr10	79706001	79706185
chr10	79707521	79707900
chr10	79831678	79832080
chr10	79981308	79981629
chr10	80042864	80043050
chr10	80426130	80426486
chr10	80532887	80533223
chr10	80544205	80544648
chr10	82821904	82822362
chr10	82822949	82823332
chr10	84047897	84048217
chr10	85158135	85158499
chr10	88497387	88497943
chr10	88807472	88808045
chr10	90631093	90631421
chr10	90701560	90701941
chr10	90736288	90736682
chr10	91504832	91505311
chr10	92886867	92887247
chr10	94449308	94449736
chr10	95954446	95954686
chr10	97871157	97871501
chr10	97925455	97925841
chr10	98346843	98347233
chr10	98551128	98551551
chr10	98662164	98662542
chr10	100083336	100083742
chr10	100099335	100099664
chr10	100135905	100136279
chr10	100544609	100544923
chr10	101221194	101221542
chr10	102064368	102065102
chr10	102071483	102071842
chr10	102168170	102168508
chr10	102636710	102637127
chr10	102837564	102837978
chr10	102913219	102913549
chr10	102966138	102966460
chr10	103066504	103066941
chr10	103235711	103236418
chr10	104361779	104361962
chr10	104535584	104536007
chr10	104551749	104552136
chr10	104639202	104639430
chr10	105545589	105545928
chr10	105755442	105755991
chr10	107614473	107614869
chr10	108300788	108301157
chr10	108925787	108926163
chr10	108981724	108982227
chr10	109819778	109820152
chr10	110271458	110271946
chr10	110344009	110344423
chr10	110941211	110941582
chr10	110990139	110990523
chr10	111136287	111136636
chr10	111668503	111668727
chr10	111692096	111692245
chr10	112283709	112283861
chr10	112285766	112286188
chr10	114138892	114139327
chr10	114196610	114196998
chr10	114652487	114652854
chr10	114843539	114843919
chr10	115276914	115277347
chr10	115735699	115735935
chr10	115899380	115899725
chr10	116262604	116262815
chr10	116467556	116468073
chr10	116753907	116754753
chr10	117123796	117124203
chr10	117277455	117277733
chr10	117688547	117689192
chr10	118322479	118322918
chr10	118821104	118821632
chr10	118840245	118840475
chr10	118884172	118884587
chr10	119226338	119226636
chr10	119252841	119253332
chr10	119269314	119269788
chr10	119580337	119580811
chr10	119997877	119998094
chr10	120119243	120119724
chr10	120127966	120128351
chr10	120131397	120131934
chr10	120215108	120215408
chr10	120778094	120778313
chr10	121094213	121094443
chr10	121095859	121096241
chr10	121370243	121370658
chr10	121536923	121537432
chr10	121702973	121703344
chr10	122485858	122486442
chr10	123396109	123396355
chr10	126019540	126019956
chr10	126033228	126034144
chr10	127305337	127305722
chr10	127307016	127307448
chr10	127574133	127574515
chr10	127575350	127575583
chr10	127722153	127722375
chr10	127914997	127915392
chr10	130135418	130135786
chr10	130468994	130469585
chr10	130719783	130720255
chr10	130854010	130854457
chr10	130856422	130857103
chr10	130982343	130982717
chr10	130993432	130993655
chr10	131016760	131017435
chr10	131030703	131031166
chr10	131185327	131185661
chr10	131348271	131348574
chr10	131638334	131638795
chr10	132236606	132236904
chr10	132445132	132445555
chr10	132546932	132547631
chr10	132659674	132660029
chr10	133705484	133705901
chr10	134251699	134252241
chr10	134330851	134331532
chr10	134756083	134756384
chr11	887131	887620
chr11	1034246	1034655
chr11	4075953	4076359
chr11	5202686	5202847
chr11	5533079	5533460
chr11	6362929	6363534
chr11	7650380	7650677
chr11	7772960	7773554
chr11	8274344	8274691
chr11	8666745	8667326
chr11	8793066	8793408
chr11	9134865	9135262
chr11	9455091	9455504
chr11	10390485	10391032
chr11	10529991	10530343
chr11	10534627	10535002
chr11	10584198	10584570
chr11	10658336	10658996
chr11	11258008	11258480
chr11	11725774	11726180
chr11	12044842	12045364
chr11	12303968	12304370
chr11	12701524	12701932
chr11	12820385	12820979
chr11	14168472	14168848
chr11	14912937	14913294
chr11	15211666	15212039
chr11	15276829	15277203
chr11	15278442	15278790
chr11	15285622	15286277
chr11	15832486	15832897
chr11	15979695	15980289
chr11	16000308	16000499
chr11	16103790	16104174
chr11	16327782	16328038
chr11	16351921	16352056
chr11	16884250	16884431
chr11	17218916	17219201
chr11	17331756	17332146
chr11	17537466	17538278
chr11	17591317	17591764
chr11	18242856	18243677
chr11	18504749	18505362
chr11	18756018	18756376
chr11	18787325	18787468
chr11	21551708	21552129
chr11	21886341	21886717
chr11	21888906	21889633
chr11	22720353	22720818
chr11	26438376	26438734
chr11	26704122	26704505
chr11	27214057	27214258
chr11	27324483	27324613
chr11	27762018	27762398
chr11	28045467	28045952
chr11	30727356	30727786
chr11	30790961	30791134
chr11	30792003	30793626
chr11	32029276	32029645
chr11	32095795	32096278
chr11	32310539	32310766
chr11	32348293	32348672
chr11	32370065	32370599
chr11	32508124	32508528
chr11	33178788	33179233
chr11	33815559	33815805
chr11	34024283	34024434
chr11	36143886	36144271
chr11	36352049	36352252
chr11	36463456	36463835
chr11	37254958	37255720
chr11	37256177	37256547
chr11	37538551	37538952
chr11	37574919	37575248
chr11	37779928	37780313
chr11	38380425	38380808
chr11	38966744	38967707
chr11	39002380	39002719
chr11	39198740	39199028
chr11	39436653	39437024
chr11	40330025	40330470
chr11	40524027	40524405
chr11	40938103	40938476
chr11	41475931	41476532
chr11	41830294	41830662
chr11	42511194	42511577
chr11	42986245	42986662
chr11	43031949	43032231
chr11	44164935	44165317
chr11	44169794	44170157
chr11	44268958	44269350
chr11	44271155	44271537
chr11	44292712	44293041
chr11	44300974	44301441
chr11	44601458	44601822
chr11	44870921	44872035
chr11	45661499	45661675
chr11	45721438	45721833
chr11	46678880	46679028
chr11	47030468	47030854
chr11	47033272	47033697
chr11	49294267	49294645
chr11	54834909	54835327
chr11	54946119	54946442
chr11	54957954	54958327
chr11	55959212	55959792
chr11	57005463	57005877
chr11	57033543	57033896
chr11	57147195	57147575
chr11	57163379	57163829
chr11	57558626	57559010
chr11	58252765	58253156
chr11	59081284	59081876
chr11	59090051	59090373
chr11	59152391	59152766
chr11	59214570	59214894
chr11	61029600	61030078
chr11	61377140	61377467
chr11	61446545	61446959
chr11	61468253	61468416
chr11	61474284	61474688
chr11	62669258	62669831
chr11	63731194	63731709
chr11	63920023	63920497
chr11	64753986	64754329
chr11	65845322	65845686
chr11	65914557	65914655
chr11	66560033	66560490
chr11	66601095	66601253
chr11	66812349	66812699
chr11	68654768	68655055
chr11	68730448	68730795
chr11	68821069	68821621
chr11	68835891	68836464
chr11	69062540	69062935
chr11	69123338	69123947
chr11	69146109	69146275
chr11	69229509	69230056
chr11	69236088	69236646
chr11	69619133	69620163
chr11	69710073	69710322
chr11	69791211	69791586
chr11	70774938	70775311
chr11	70779442	70779842
chr11	71596020	71596178
chr11	72538566	72538950
chr11	73818122	73818324
chr11	73857181	73857549
chr11	73859182	73859572
chr11	74550218	74550612
chr11	75797232	75797686
chr11	75883257	75883473
chr11	77032791	77033216
chr11	77211797	77212637
chr11	79471961	79472162
chr11	80411376	80411543
chr11	80610873	80611297
chr11	80705935	80706291
chr11	80876108	80876472
chr11	81193400	81194340
chr11	81251916	81252299
chr11	82139442	82139886
chr11	82881865	82882236
chr11	83122920	83123274
chr11	83135789	83136182
chr11	83334520	83334849
chr11	83547253	83547391
chr11	83606901	83607371
chr11	83716892	83717205
chr11	85145344	85145801
chr11	86328111	86328458
chr11	86583900	86584063
chr11	86585353	86585501
chr11	87143716	87144066
chr11	87289048	87289442
chr11	88808863	88809251
chr11	89643884	89644361
chr11	90210322	90210716
chr11	90310812	90311221
chr11	90874921	90875145
chr11	91665679	91665961
chr11	91808107	91808502
chr11	92138654	92139355
chr11	92958515	92958735
chr11	92976033	92976305
chr11	94105443	94105819
chr11	94767267	94767830
chr11	94789786	94790031
chr11	95107369	95107754
chr11	95535652	95535961
chr11	95615920	95616271
chr11	96358611	96358969
chr11	96524647	96525047
chr11	98577292	98577510
chr11	98598147	98598538
chr11	98973915	98974543
chr11	99470546	99470922
chr11	99479294	99479668
chr11	99835760	99836149
chr11	100022178	100022551
chr11	100082283	100082995
chr11	100325368	100325832
chr11	100903082	100903933
chr11	100910956	100911342
chr11	101166099	101166482
chr11	102222658	102222851
chr11	102297745	102298238
chr11	102306496	102306892
chr11	103075490	103075915
chr11	103614855	103615231
chr11	104486598	104487031
chr11	104550308	104550860
chr11	104753866	104754237
chr11	106333038	106333517
chr11	106818239	106819041
chr11	107232588	107233189
chr11	108570301	108570724
chr11	108723407	108723815
chr11	109221468	109221820
chr11	109319809	109320228
chr11	109399814	109400189
chr11	109730652	109731020
chr11	110033732	110034112
chr11	110230377	110230793
chr11	110351800	110352028
chr11	110640641	110641048
chr11	110728919	110729134
chr11	111297407	111298005
chr11	111504631	111505007
chr11	111597083	111598366
chr11	111668060	111668442
chr11	111875547	111875899
chr11	112224917	112225286
chr11	112268476	112268885
chr11	112284888	112285250
chr11	112387877	112388147
chr11	112406425	112406816
chr11	112680880	112681541
chr11	112698041	112698482
chr11	112757574	112757948
chr11	113003254	113003716
chr11	113515046	113515418
chr11	113517953	113518674
chr11	113524096	113524472
chr11	114115110	114115473
chr11	116392145	116392516
chr11	116394962	116395346
chr11	116555662	116555892
chr11	116883036	116884402
chr11	116953207	116953448
chr11	117424314	117424645
chr11	119553868	119554235
chr11	119649876	119650274
chr11	121072549	121072915
chr11	121098732	121099210
chr11	121156796	121156947
chr11	121305508	121305897
chr11	121605107	121605614
chr11	121606442	121606708
chr11	121629070	121629775
chr11	121646734	121647651
chr11	121976780	121977066
chr11	121991333	121991657
chr11	122133918	122134733
chr11	122316557	122316966
chr11	122513423	122513844
chr11	122526406	122526751
chr11	122589156	122589665
chr11	122592181	122592523
chr11	122603375	122603762
chr11	122659913	122660349
chr11	122736540	122736727
chr11	122843449	122843913
chr11	122889359	122889523
chr11	123468908	123469079
chr11	123512462	123512675
chr11	124100541	124101069
chr11	124550311	124550552
chr11	124551455	124551818
chr11	124552620	124553563
chr11	126004094	126004542
chr11	126007479	126007883
chr11	126604359	126604772
chr11	127308522	127309337
chr11	127406032	127406253
chr11	127412629	127413009
chr11	127427807	127428253
chr11	127853208	127853721
chr11	128133031	128133591
chr11	128143213	128143439
chr11	128147712	128148315
chr11	128157045	128157143
chr11	128180454	128180552
chr11	128182263	128182361
chr11	128184236	128184334
chr11	128185610	128186197
chr11	128676400	128676817
chr11	128918852	128919118
chr11	129436213	129436438
chr11	129472497	129472861
chr11	129813447	129813838
chr11	131108415	131108592
chr11	131135287	131135972
chr11	131186386	131186741
chr11	131190819	131191135
chr11	131279907	131280149
chr11	131351085	131351474
chr11	131373285	131373715
chr11	131827374	131827769
chr11	132390320	132390706
chr11	134362645	134362978
chr11	134391423	134391627
chr11	134392420	134392842
chr12	2263977	2264354
chr12	2314618	2314880
chr12	2358041	2358575
chr12	3029742	3030105
chr12	3228560	3228926
chr12	3325927	3326365
chr12	3928109	3928465
chr12	4075489	4075710
chr12	4394656	4395031
chr12	4463754	4464291
chr12	6642329	6642963
chr12	6668740	6669288
chr12	6923220	6923780
chr12	7656263	7656650
chr12	7870574	7870789
chr12	8637071	8637432
chr12	8884668	8885028
chr12	9791107	9791524
chr12	10283152	10283329
chr12	10292255	10292637
chr12	11246361	11246746
chr12	11640007	11640651
chr12	11644453	11644989
chr12	11803631	11804081
chr12	11810012	11810333
chr12	11899781	11900157
chr12	12292508	12292858
chr12	12293816	12293941
chr12	12988844	12989178
chr12	14237787	14238360
chr12	14284306	14284673
chr12	14479157	14479525
chr12	14814673	14815059
chr12	15005212	15005585
chr12	15323417	15323946
chr12	16156301	16156751
chr12	16672896	16673270
chr12	16770403	16770662
chr12	16822881	16823160
chr12	16857871	16858125
chr12	17107412	17107796
chr12	17415830	17416035
chr12	18139416	18139796
chr12	19345389	19345840
chr12	19592341	19592836
chr12	19674985	19675159
chr12	19844284	19844880
chr12	21391780	21392135
chr12	21598307	21598557
chr12	21761921	21762333
chr12	21972532	21972924
chr12	22076549	22077454
chr12	22219385	22219598
chr12	22248477	22249041
chr12	22895539	22895952
chr12	22979214	22979668
chr12	23366462	23366626
chr12	23397753	23398322
chr12	23608379	23608996
chr12	24351891	24352109
chr12	24422561	24423256
chr12	24810390	24810745
chr12	24868304	24868481
chr12	24881147	24881513
chr12	25969606	25970005
chr12	26218539	26218919
chr12	26292263	26292683
chr12	26564375	26564813
chr12	26661784	26662185
chr12	26723175	26723566
chr12	27057936	27058324
chr12	28138343	28138515
chr12	28395636	28396036
chr12	28907602	28907986
chr12	30914213	30914724
chr12	30946385	30946814
chr12	31001787	31002525
chr12	31300041	31300421
chr12	31790883	31791279
chr12	31804952	31805349
chr12	31811894	31812242
chr12	32631739	32632258
chr12	32815949	32816546
chr12	32948222	32948934
chr12	36735102	36735486
chr12	38668573	38668963
chr12	38691836	38692221
chr12	39128564	39128926
chr12	39753424	39754624
chr12	39755628	39756010
chr12	40202057	40202577
chr12	40474454	40474929
chr12	40481283	40481506
chr12	40500121	40500321
chr12	40675312	40675478
chr12	40957914	40958290
chr12	40979139	40979532
chr12	41985275	41985648
chr12	42648759	42649178
chr12	42737552	42738425
chr12	43521992	43522314
chr12	43565979	43566355
chr12	43652710	43653074
chr12	43904783	43905169
chr12	44241541	44241684
chr12	45131437	45131733
chr12	45292392	45292762
chr12	45431227	45431474
chr12	45553745	45554115
chr12	46032380	46032773
chr12	46268378	46268645
chr12	46271034	46271389
chr12	46271829	46272427
chr12	46503491	46503888
chr12	46539815	46539946
chr12	46588887	46589186
chr12	46947281	46947651
chr12	48343011	48343387
chr12	48460981	48461361
chr12	48976666	48977053
chr12	49305073	49305676
chr12	49927512	49927896
chr12	49948405	49948801
chr12	49950414	49950721
chr12	49993069	49993438
chr12	51434402	51434569
chr12	51653750	51654133
chr12	52025829	52026200
chr12	52312239	52312624
chr12	52369749	52369911
chr12	52435970	52436425
chr12	52732143	52732631
chr12	52939488	52939897
chr12	53093409	53093810
chr12	53182546	53182938
chr12	53302075	53303047
chr12	53304807	53305210
chr12	54521483	54521607
chr12	55348751	55349370
chr12	56425099	56425522
chr12	56516957	56517322
chr12	56932433	56932786
chr12	57288404	57288760
chr12	57641853	57642288
chr12	57829911	57830282
chr12	58117022	58117410
chr12	58512026	58512261
chr12	59102004	59102405
chr12	59549629	59549801
chr12	59851316	59851678
chr12	60386727	60387062
chr12	60808630	60809110
chr12	60901098	60901467
chr12	61817913	61818290
chr12	62445043	62445327
chr12	62453164	62453543
chr12	62595219	62595595
chr12	62624869	62625262
chr12	62885542	62885967
chr12	63352883	63353094
chr12	63814123	63814576
chr12	63819397	63819863
chr12	64610102	64611090
chr12	64636329	64636940
chr12	64746956	64747329
chr12	64795041	64795504
chr12	65278012	65278480
chr12	66215051	66216016
chr12	66272446	66272599
chr12	66310785	66311176
chr12	67136063	67136419
chr12	67356582	67356964
chr12	67515501	67515881
chr12	67546948	67547409
chr12	68311931	68312280
chr12	68380863	68380978
chr12	68627996	68628358
chr12	69411020	69411342
chr12	69870781	69871290
chr12	69872995	69873247
chr12	70173362	70174017
chr12	70177324	70177629
chr12	70262850	70263259
chr12	70479244	70479682
chr12	70557388	70557771
chr12	70696650	70696992
chr12	70759217	70759590
chr12	70764732	70765108
chr12	71060579	71060867
chr12	71675550	71675852
chr12	71779886	71780265
chr12	72097482	72097744
chr12	72997629	72997900
chr12	73049573	73050401
chr12	73189935	73190354
chr12	73316727	73317104
chr12	73343326	73343516
chr12	73502398	73502762
chr12	73614438	73614813
chr12	73656215	73656342
chr12	73658213	73658613
chr12	73660560	73661057
chr12	75562033	75562574
chr12	76007984	76008161
chr12	76131159	76131645
chr12	76150662	76151009
chr12	77657514	77657922
chr12	77803061	77803327
chr12	77849278	77849524
chr12	77856511	77857133
chr12	78161662	78162025
chr12	78896698	78897067
chr12	79516974	79517364
chr12	79523837	79524121
chr12	79525194	79525566
chr12	79758968	79759537
chr12	80122015	80122275
chr12	80212179	80212563
chr12	80283736	80284136
chr12	80777312	80777970
chr12	81462275	81462652
chr12	81700922	81701345
chr12	82543156	82543559
chr12	83228998	83229382
chr12	83859338	83859669
chr12	83912931	83913338
chr12	84268200	84268701
chr12	84274510	84274953
chr12	84276806	84277195
chr12	84587284	84587662
chr12	85165958	85166143
chr12	85632543	85632943
chr12	86301017	86301551
chr12	86467255	86467484
chr12	87132508	87132879
chr12	87958070	87958471
chr12	87986543	87986917
chr12	88016431	88017091
chr12	88063172	88063544
chr12	88196723	88197163
chr12	88226785	88226988
chr12	88251409	88251792
chr12	88264466	88264876
chr12	88265456	88265986
chr12	88270412	88270815
chr12	88308101	88308931
chr12	88330560	88330931
chr12	88369908	88370173
chr12	88895388	88895743
chr12	88983231	88983676
chr12	89007909	89008463
chr12	89152078	89152461
chr12	89559219	89559666
chr12	89773492	89773726
chr12	90047937	90048307
chr12	90057124	90057728
chr12	90496944	90497244
chr12	90538328	90538659
chr12	90637650	90637984
chr12	91245718	91246114
chr12	91299722	91300101
chr12	91583720	91584099
chr12	91585156	91585498
chr12	91655495	91655868
chr12	91886339	91886742
chr12	92087401	92087553
chr12	92120563	92120957
chr12	92377363	92377815
chr12	92465766	92466148
chr12	92532130	92532512
chr12	94157755	94158122
chr12	94240868	94241221
chr12	94745828	94746202
chr12	94834104	94834482
chr12	95029674	95029978
chr12	95112214	95112594
chr12	95113775	95114244
chr12	95129468	95130321
chr12	95157215	95157728
chr12	95327460	95328257
chr12	95413030	95413410
chr12	96955468	96955845
chr12	97126900	97127242
chr12	97421584	97422290
chr12	97438138	97438289
chr12	98298505	98298888
chr12	99046150	99046323
chr12	99358436	99358853
chr12	99431732	99431912
chr12	99888436	99888805
chr12	99899257	99899610
chr12	100567473	100567764
chr12	100807290	100807651
chr12	100809277	100810053
chr12	101093275	101094206
chr12	101333314	101333517
chr12	101622085	101622396
chr12	103399513	103399900
chr12	103473331	103474030
chr12	104304253	104304693
chr12	105191794	105192215
chr12	107680017	107680402
chr12	107776997	107777350
chr12	107821032	107821430
chr12	107991357	107991727
chr12	108062324	108062534
chr12	108109058	108109552
chr12	108110143	108110542
chr12	109091170	109091385
chr12	109372346	109372762
chr12	109436212	109436353
chr12	109437024	109437377
chr12	109746733	109747207
chr12	109782975	109783443
chr12	109793450	109793845
chr12	109810780	109811077
chr12	109940378	109940621
chr12	109979421	109979788
chr12	109992212	109992660
chr12	110044688	110045435
chr12	110103063	110103670
chr12	110322091	110322314
chr12	111245995	111246284
chr12	111459889	111460102
chr12	111599363	111599773
chr12	111720079	111720618
chr12	111969509	111969971
chr12	112167860	112168333
chr12	112274660	112275063
chr12	112278444	112278839
chr12	112318725	112318878
chr12	112399286	112399672
chr12	112564532	112565014
chr12	112571506	112572098
chr12	112596234	112596420
chr12	112605605	112605994
chr12	112623942	112624331
chr12	112646906	112647425
chr12	113312635	113312792
chr12	113373820	113374451
chr12	113397183	113397415
chr12	113559829	113560205
chr12	113736084	113736394
chr12	113800220	113800874
chr12	113808599	113808962
chr12	113924532	113925114
chr12	113983028	113983499
chr12	114268595	114268951
chr12	115402214	115402581
chr12	115659788	115660159
chr12	116264848	116265255
chr12	118035659	118036298
chr12	118044297	118044557
chr12	118518109	118518498
chr12	118806153	118806336
chr12	119189992	119190363
chr12	119190890	119191271
chr12	119196559	119196974
chr12	119204937	119205313
chr12	119311546	119311940
chr12	119345250	119345483
chr12	119958418	119958955
chr12	120017554	120018173
chr12	120043268	120043595
chr12	120846810	120847665
chr12	121463441	121464134
chr12	121713553	121713840
chr12	121722876	121723937
chr12	121728720	121729064
chr12	121802244	121802744
chr12	122068226	122068675
chr12	122157529	122157915
chr12	123513962	123514253
chr12	123516751	123517105
chr12	123771159	123771671
chr12	123933336	123934298
chr12	123990161	123990922
chr12	125022430	125022798
chr12	125151235	125151636
chr12	125388838	125389236
chr12	125505139	125505706
chr12	125532993	125533284
chr12	126017399	126017766
chr12	126129331	126130037
chr12	126334170	126334487
chr12	126336906	126337745
chr12	126556038	126556552
chr12	126797785	126798253
chr12	127125465	127125846
chr12	127647795	127648184
chr12	127656624	127656969
chr12	129804689	129805248
chr12	131505392	131505849
chr12	131593322	131593718
chr12	131820891	131821263
chr13	18450483	18451099
chr13	18452687	18453279
chr13	18662037	18662368
chr13	18736769	18737121
chr13	18739067	18739506
chr13	19059027	19059414
chr13	20170290	20170717
chr13	20268885	20269274
chr13	20670088	20670383
chr13	21353916	21354067
chr13	23750854	23751108
chr13	24646911	24647178
chr13	24658822	24659192
chr13	24996832	24997165
chr13	25487299	25487725
chr13	26514999	26515911
chr13	26931473	26932003
chr13	27483597	27483981
chr13	27509709	27510091
chr13	28131069	28131496
chr13	29510955	29511486
chr13	29636269	29636658
chr13	29688274	29688631
chr13	29837066	29837437
chr13	29882761	29882955
chr13	30246465	30246926
chr13	30272398	30272569
chr13	30488918	30489323
chr13	30494634	30495049
chr13	30550335	30550738
chr13	32042591	32042756
chr13	32505143	32506073
chr13	32649972	32650308
chr13	32906858	32907108
chr13	33001024	33001613
chr13	34559364	34560222
chr13	35024521	35025458
chr13	35436374	35436828
chr13	35629531	35629979
chr13	35953014	35953408
chr13	36312107	36312498
chr13	36439146	36439834
chr13	36483896	36484539
chr13	36673159	36673562
chr13	37414325	37414717
chr13	37439316	37439767
chr13	37457305	37457510
chr13	37507122	37507926
chr13	38008108	38008432
chr13	38632853	38633253
chr13	38841549	38841923
chr13	38979830	38980226
chr13	39105747	39106132
chr13	39424322	39424940
chr13	39549205	39549572
chr13	39865934	39866232
chr13	41826419	41827051
chr13	42350589	42350994
chr13	43589402	43590120
chr13	43830296	43830509
chr13	44640683	44640953
chr13	44791990	44792355
chr13	44801753	44802157
chr13	44912218	44912608
chr13	45150677	45151041
chr13	45224573	45224996
chr13	45254350	45254739
chr13	45309415	45309926
chr13	45367863	45368244
chr13	45369237	45369429
chr13	45371443	45372031
chr13	45448058	45448499
chr13	45588990	45589163
chr13	45597665	45598252
chr13	45860338	45860898
chr13	45862025	45862581
chr13	45876755	45877092
chr13	46138833	46139211
chr13	47964614	47964976
chr13	48663080	48663633
chr13	49860487	49861092
chr13	50620407	50620867
chr13	50973799	50974016
chr13	52240077	52240698
chr13	52241130	52241515
chr13	52271092	52271481
chr13	52630922	52631100
chr13	53489781	53490204
chr13	54280199	54281115
chr13	54588363	54588992
chr13	54603557	54603961
chr13	54916050	54916418
chr13	54981392	54981615
chr13	55236160	55236545
chr13	55535263	55535633
chr13	55749676	55750043
chr13	56174095	56174394
chr13	56586712	56586883
chr13	57505176	57505687
chr13	57907899	57908281
chr13	57933798	57933999
chr13	58054548	58054779
chr13	58134840	58135244
chr13	58692030	58692430
chr13	59014366	59014777
chr13	59015788	59015907
chr13	59155539	59155932
chr13	59228415	59228799
chr13	59420836	59421207
chr13	59491271	59492036
chr13	59572025	59572260
chr13	60620677	60621452
chr13	61056979	61057321
chr13	62615090	62615461
chr13	62780658	62781039
chr13	62942059	62942438
chr13	63397563	63397948
chr13	63559729	63560109
chr13	63583250	63583623
chr13	63755482	63755994
chr13	64229153	64229548
chr13	65320423	65320810
chr13	65395306	65395670
chr13	66332331	66332707
chr13	66946751	66947122
chr13	68507823	68508259
chr13	69911610	69912057
chr13	70321124	70321506
chr13	72807266	72807641
chr13	73238106	73238478
chr13	73277627	73278201
chr13	73615027	73615381
chr13	73891280	73891659
chr13	73936810	73937188
chr13	74587617	74587976
chr13	74799009	74799411
chr13	74808817	74809183
chr13	75238793	75239162
chr13	76868875	76869367
chr13	76991660	76992015
chr13	77165563	77165763
chr13	77335400	77335738
chr13	77855105	77855489
chr13	77895993	77896494
chr13	78131404	78131605
chr13	78262677	78263057
chr13	78763100	78763472
chr13	78920558	78920946
chr13	78922055	78922354
chr13	79131268	79131686
chr13	79578264	79578577
chr13	79629960	79630332
chr13	79707329	79707743
chr13	79782021	79782396
chr13	79832025	79832391
chr13	79864490	79864853
chr13	79942624	79942827
chr13	80034323	80035168
chr13	80268357	80268744
chr13	80453225	80453628
chr13	80865501	80865867
chr13	81437582	81438001
chr13	82823825	82824190
chr13	82852622	82853016
chr13	83047148	83047488
chr13	83298419	83298808
chr13	83355054	83355477
chr13	83576353	83576741
chr13	83666645	83666930
chr13	84217339	84217598
chr13	84623946	84624371
chr13	84806313	84806688
chr13	85023962	85024360
chr13	85129969	85130369
chr13	86660869	86661400
chr13	86709497	86710309
chr13	87309446	87310444
chr13	88161421	88161837
chr13	88388129	88388725
chr13	88947486	88947880
chr13	88964693	88964933
chr13	88972082	88972485
chr13	89519711	89520104
chr13	89569380	89569790
chr13	89700083	89700276
chr13	90533887	90534302
chr13	90570262	90570646
chr13	90771236	90771659
chr13	91310540	91310925
chr13	92319503	92320035
chr13	92818554	92818839
chr13	93090858	93091265
chr13	93441033	93441406
chr13	93484292	93484707
chr13	94587837	94588064
chr13	94596741	94597079
chr13	94646694	94647151
chr13	94694695	94695048
chr13	94967015	94967357
chr13	94980422	94980904
chr13	96026372	96026775
chr13	97019200	97019557
chr13	97397143	97397354
chr13	97666552	97666955
chr13	98921833	98922241
chr13	99038473	99038937
chr13	99126343	99126667
chr13	99684200	99684712
chr13	99685653	99686324
chr13	99748902	99749113
chr13	99842214	99842822
chr13	100750500	100750867
chr13	100833872	100834214
chr13	101776878	101777279
chr13	102367488	102367879
chr13	104107691	104108109
chr13	104945967	104946346
chr13	105095127	105095319
chr13	105650480	105650604
chr13	105741025	105741470
chr13	105746361	105746745
chr13	105823663	105824040
chr13	105986689	105987048
chr13	106369942	106370347
chr13	106606182	106606930
chr13	107716654	107717061
chr13	107859028	107859455
chr13	108016916	108017283
chr13	108343519	108344147
chr13	108386267	108386642
chr13	108563534	108563932
chr13	108842902	108843356
chr13	108850529	108850943
chr13	108876730	108877009
chr13	109102874	109103322
chr13	109104878	109105818
chr13	109118110	109118499
chr13	109209053	109209648
chr13	109350161	109350388
chr13	109678552	109678968
chr13	111793038	111793248
chr13	111800109	111800513
chr13	112359655	112359993
chr13	112375406	112375730
chr13	112458319	112458423
chr13	112461357	112461744
chr13	113914556	113914963
chr14	20028516	20028908
chr14	20411683	20411973
chr14	21195303	21195662
chr14	21262587	21262793
chr14	21513341	21513691
chr14	21954391	21954727
chr14	22085120	22085564
chr14	25216090	25216475
chr14	25613892	25614247
chr14	25644164	25644551
chr14	25791130	25791529
chr14	26102075	26102502
chr14	27669576	27669950
chr14	27679477	27679754
chr14	27858378	27858733
chr14	29458860	29459279
chr14	30578951	30579403
chr14	31015175	31015556
chr14	31426869	31427434
chr14	32263878	32265260
chr14	32480076	32480447
chr14	33304267	33304657
chr14	34711254	34711637
chr14	35511018	35511397
chr14	36055417	36055796
chr14	36295178	36295535
chr14	36299140	36299508
chr14	38066008	38066395
chr14	38092092	38093001
chr14	38373891	38374587
chr14	40428030	40428407
chr14	40443415	40443859
chr14	41347323	41347648
chr14	41595556	41595924
chr14	41838623	41839066
chr14	42038042	42038520
chr14	42561295	42561457
chr14	43047624	43047999
chr14	43324833	43325348
chr14	43633878	43634264
chr14	43760237	43760350
chr14	44152319	44152701
chr14	44178968	44179392
chr14	44507676	44508262
chr14	44820168	44820565
chr14	45643720	45644087
chr14	46857566	46857952
chr14	46998439	46998702
chr14	47974957	47975365
chr14	48369061	48369533
chr14	48855158	48855516
chr14	49398569	49398962
chr14	50565591	50565952
chr14	51143972	51144440
chr14	51651306	51651425
chr14	53039126	53039499
chr14	53273888	53274271
chr14	53392377	53392757
chr14	53431199	53431695
chr14	53436660	53436839
chr14	54260340	54260550
chr14	54584179	54584606
chr14	54587632	54588067
chr14	55254313	55254494
chr14	55277975	55278190
chr14	55592473	55592924
chr14	55913504	55913878
chr14	55949032	55949613
chr14	56362581	56362957
chr14	56512773	56513170
chr14	56580824	56581091
chr14	56917532	56917763
chr14	57416340	57416724
chr14	57461805	57462182
chr14	57535070	57535435
chr14	57834075	57835026
chr14	58189132	58189363
chr14	58505384	58505536
chr14	59122245	59122794
chr14	59688256	59688719
chr14	60237883	60238214
chr14	60371209	60371600
chr14	60616933	60617342
chr14	60667634	60667860
chr14	60719767	60720229
chr14	62136218	62136588
chr14	62671993	62672394
chr14	62740351	62740901
chr14	63376703	63377078
chr14	65111855	65112330
chr14	65942799	65943322
chr14	66817141	66817324
chr14	67470796	67471256
chr14	68086460	68086817
chr14	68205618	68205989
chr14	68219045	68219410
chr14	68221254	68221622
chr14	69289874	69290242
chr14	70396433	70396651
chr14	70398439	70398811
chr14	70419367	70419936
chr14	70854676	70854802
chr14	71987749	71988225
chr14	72429281	72429666
chr14	72551716	72552404
chr14	73676891	73677278
chr14	74517044	74517417
chr14	74767136	74767322
chr14	74797691	74797885
chr14	75849401	75849835
chr14	75872342	75872979
chr14	75965871	75966265
chr14	75983034	75983423
chr14	76054430	76054806
chr14	76067776	76068392
chr14	76256355	76256748
chr14	76456195	76456586
chr14	76619633	76620085
chr14	77006490	77006900
chr14	77033664	77034023
chr14	77184609	77184988
chr14	77378485	77378786
chr14	79892969	79893663
chr14	81095411	81095881
chr14	81603355	81603749
chr14	81605313	81605703
chr14	81726500	81727247
chr14	81795684	81796221
chr14	82346763	82347377
chr14	82368953	82369390
chr14	82636563	82637465
chr14	82830114	82830488
chr14	82832655	82833005
chr14	83127951	83128323
chr14	83488891	83489258
chr14	83559947	83560361
chr14	83564194	83564805
chr14	83786962	83787338
chr14	83809094	83809668
chr14	83812709	83813062
chr14	84350656	84350776
chr14	84846875	84847476
chr14	84989330	84989702
chr14	85067999	85068347
chr14	85607715	85608078
chr14	85678060	85678479
chr14	85721900	85722259
chr14	85863649	85864153
chr14	85902242	85902624
chr14	86001522	86001905
chr14	86049567	86049941
chr14	86051106	86051455
chr14	86202114	86202302
chr14	86479759	86480052
chr14	86847176	86847445
chr14	86854031	86854634
chr14	87307346	87307444
chr14	88347867	88348229
chr14	89308678	89309049
chr14	89980660	89981052
chr14	89994561	89995413
chr14	90164629	90164998
chr14	90234694	90235027
chr14	90620619	90621039
chr14	90651632	90652199
chr14	90678392	90678766
chr14	90680998	90681259
chr14	90893919	90894220
chr14	90895540	90895879
chr14	91455282	91455652
chr14	91715104	91715707
chr14	93015140	93015337
chr14	93017848	93018209
chr14	93293292	93293535
chr14	93416163	93416517
chr14	95160103	95160416
chr14	95274817	95275530
chr14	95662277	95662671
chr14	95793480	95794313
chr14	96014126	96014527
chr14	96041845	96042187
chr14	96169333	96169826
chr14	96196763	96197120
chr14	96540974	96541277
chr14	96601994	96602210
chr14	96690232	96690505
chr14	96751500	96751819
chr14	96754446	96754855
chr14	96771560	96771943
chr14	96995009	96995370
chr14	97050190	97050717
chr14	97247799	97248193
chr14	97378451	97378918
chr14	97380761	97381145
chr14	97466355	97466687
chr14	98034761	98035134
chr14	99152943	99153345
chr14	99155877	99156258
chr14	99197355	99197749
chr14	99604813	99604996
chr14	99758187	99758526
chr14	100225583	100225940
chr14	101120199	101120563
chr14	101132128	101132699
chr14	101163075	101163281
chr14	102059609	102059803
chr14	102061602	102061806
chr14	102228669	102228879
chr14	102614133	102614604
chr14	102806720	102807093
chr14	102844974	102845362
chr14	102918183	102918495
chr14	103143144	103143652
chr14	103161532	103161870
chr14	103312086	103312467
chr14	103395349	103395894
chr14	103760235	103760643
chr14	103763084	103763515
chr14	103771436	103771859
chr14	105167996	105168348
chr14	105286666	105287082
chr14	106027706	106027918
chr14	106083026	106083352
chr15	23742604	23742953
chr15	23927917	23928311
chr15	27633699	27634008
chr15	32414809	32415093
chr15	32422264	32423010
chr15	32670872	32671421
chr15	34973147	34973475
chr15	35179555	35180141
chr15	35261512	35261884
chr15	35830936	35831110
chr15	35845268	35845726
chr15	36148475	36149105
chr15	36210346	36210685
chr15	36326681	36327208
chr15	36831567	36831964
chr15	38156763	38157064
chr15	38171830	38172102
chr15	38172820	38173187
chr15	38986361	38986799
chr15	39258915	39259323
chr15	39340361	39340758
chr15	42284403	42284588
chr15	42814717	42815235
chr15	42990594	42990960
chr15	43117455	43117716
chr15	43222228	43222483
chr15	43350913	43351146
chr15	43605592	43605947
chr15	45442856	45443439
chr15	45501508	45501887
chr15	45804826	45805209
chr15	46026240	46026616
chr15	46199254	46199653
chr15	46496840	46497146
chr15	48434176	48434481
chr15	48448374	48449234
chr15	48886687	48886858
chr15	49531068	49531770
chr15	53106174	53106624
chr15	53818115	53818486
chr15	53850289	53850712
chr15	53865288	53865765
chr15	54536614	54536989
chr15	54981597	54981743
chr15	55086969	55087570
chr15	55214257	55214639
chr15	55230210	55230438
chr15	55310813	55311764
chr15	55538025	55538435
chr15	55617745	55618230
chr15	55756176	55756591
chr15	56411367	56411774
chr15	56552531	56553158
chr15	57526154	57526552
chr15	57689592	57689786
chr15	58653526	58653925
chr15	59266960	59267122
chr15	59528528	59528875
chr15	59686583	59686952
chr15	60805928	60806259
chr15	61549940	61550069
chr15	61689635	61690048
chr15	61812340	61812592
chr15	61860373	61860603
chr15	62073561	62073910
chr15	62095875	62096265
chr15	62112384	62112638
chr15	62724153	62724352
chr15	63411685	63412047
chr15	64209940	64210323
chr15	64229894	64230217
chr15	64737496	64737877
chr15	64795140	64795528
chr15	65072504	65072924
chr15	65236865	65237472
chr15	65628282	65628716
chr15	67163926	67164313
chr15	67610635	67611018
chr15	67936976	67937335
chr15	68262997	68263332
chr15	68388427	68388867
chr15	68613801	68614046
chr15	68849927	68851059
chr15	69027016	69027683
chr15	69038756	69039113
chr15	70754132	70754428
chr15	70758696	70759071
chr15	70765358	70765753
chr15	71132590	71132981
chr15	71471959	71472389
chr15	71776426	71776831
chr15	72215995	72216514
chr15	72307995	72308388
chr15	72822545	72822918
chr15	72856501	72857044
chr15	74219411	74219814
chr15	74952677	74952901
chr15	75500242	75500819
chr15	75796542	75796937
chr15	75818195	75818370
chr15	75855686	75855925
chr15	75879796	75880172
chr15	76582849	76583262
chr15	76750913	76751438
chr15	77242766	77243236
chr15	77264608	77264920
chr15	77774415	77774827
chr15	78008857	78009258
chr15	79376137	79376421
chr15	81768628	81768996
chr15	81854006	81854277
chr15	81919668	81920061
chr15	82350302	82350791
chr15	82363813	82364122
chr15	83233529	83234184
chr15	83244039	83244429
chr15	83244940	83245220
chr15	83250686	83251058
chr15	83699180	83699473
chr15	83715637	83716018
chr15	84210021	84210189
chr15	85132075	85132697
chr15	85558607	85558982
chr15	86740558	86741056
chr15	87818829	87819196
chr15	88203298	88203566
chr15	88378530	88378955
chr15	89007360	89007978
chr15	89017647	89017829
chr15	89391923	89392298
chr15	89399213	89399614
chr15	89425139	89425506
chr15	89468424	89468822
chr15	89934413	89934792
chr15	90149627	90149985
chr15	90152501	90153003
chr15	90640180	90640525
chr15	90673239	90673599
chr15	90869879	90870283
chr15	92951458	92951838
chr15	93774142	93774344
chr15	93778831	93779213
chr15	93791033	93791446
chr15	93948003	93948836
chr15	94314254	94314723
chr15	94332451	94332878
chr15	94504505	94504898
chr15	94514826	94515212
chr15	94687347	94687990
chr15	94953840	94954691
chr15	95181679	95182056
chr15	95411759	95412140
chr15	96773403	96773766
chr15	96893883	96894606
chr15	97160201	97160755
chr15	97377820	97378076
chr15	97606945	97607424
chr15	98145823	98146359
chr15	98270025	98270389
chr15	99485315	99485537
chr15	99692117	99692272
chr15	100142084	100143055
chr15	100160342	100160714
chr16	914753	915366
chr16	1236892	1237196
chr16	3024475	3024854
chr16	3149131	3149507
chr16	3178097	3178478
chr16	3879270	3879560
chr16	3920684	3921109
chr16	4043730	4044416
chr16	4172812	4173217
chr16	8510767	8511132
chr16	8566714	8566935
chr16	9034946	9035328
chr16	9186921	9187345
chr16	9200687	9201060
chr16	9394311	9394747
chr16	9395635	9396093
chr16	9569015	9569528
chr16	10519848	10520367
chr16	10616108	10616489
chr16	10914013	10914372
chr16	11081105	11081498
chr16	11363297	11363728
chr16	11589970	11590355
chr16	11604529	11605206
chr16	11919421	11919817
chr16	12093159	12093843
chr16	12106289	12106747
chr16	12407359	12407775
chr16	12711103	12711559
chr16	12880284	12880650
chr16	13140593	13141206
chr16	13263840	13264164
chr16	13459179	13459515
chr16	13799228	13799613
chr16	13855505	13855864
chr16	15892755	15893258
chr16	17401824	17402190
chr16	17561873	17562225
chr16	17748152	17749251
chr16	19383774	19383940
chr16	19409418	19409785
chr16	19696463	19696796
chr16	20725039	20725448
chr16	21050158	21050484
chr16	21483231	21483608
chr16	22034589	22034968
chr16	22874241	22874645
chr16	23087890	23088271
chr16	23100485	23100616
chr16	23178941	23179325
chr16	23251991	23252143
chr16	23262210	23262318
chr16	23296056	23296652
chr16	23637384	23637752
chr16	23656192	23656545
chr16	23667915	23668020
chr16	23776273	23776827
chr16	23785554	23785955
chr16	23800499	23800990
chr16	23819967	23820618
chr16	23821448	23821615
chr16	23940127	23940296
chr16	24231871	24232096
chr16	24421861	24422053
chr16	24791860	24792243
chr16	24938987	24939222
chr16	25208116	25208548
chr16	25210564	25210949
chr16	25352511	25352998
chr16	25376504	25376693
chr16	25384037	25384605
chr16	25648977	25649310
chr16	25653129	25653531
chr16	25718716	25719095
chr16	25737973	25738531
chr16	25970702	25970897
chr16	26290126	26290456
chr16	26497705	26498191
chr16	26628510	26629021
chr16	26640827	26641058
chr16	26646650	26647080
chr16	26721902	26722321
chr16	27245803	27246499
chr16	27672374	27672699
chr16	30566218	30566568
chr16	30595995	30596540
chr16	30617980	30618390
chr16	30802973	30803564
chr16	30822368	30822796
chr16	31101139	31101672
chr16	31102832	31103445
chr16	31180928	31181333
chr16	31188286	31188977
chr16	45164645	45165208
chr16	45227949	45228316
chr16	45462328	45462648
chr16	45618539	45618765
chr16	46115130	46116499
chr16	47305119	47305369
chr16	48292466	48292908
chr16	48324497	48325336
chr16	48433783	48433926
chr16	50023149	50023515
chr16	50030371	50030753
chr16	50215717	50216090
chr16	50229039	50229438
chr16	50244998	50245400
chr16	50463067	50463546
chr16	50545799	50546195
chr16	50558928	50559727
chr16	50559845	50560953
chr16	51042060	51042420
chr16	51633115	51633456
chr16	51685344	51685928
chr16	51688586	51688967
chr16	52439579	52439981
chr16	52642236	52642637
chr16	52746626	52746986
chr16	53047795	53048171
chr16	53066578	53066828
chr16	53095907	53096307
chr16	53213483	53214055
chr16	53320852	53321237
chr16	53916370	53916997
chr16	54040005	54040388
chr16	54353957	54354436
chr16	54422128	54422340
chr16	54426957	54427239
chr16	56014575	56014727
chr16	56429944	56430448
chr16	56438524	56438934
chr16	56440166	56440650
chr16	56442143	56442542
chr16	56922673	56923181
chr16	57732381	57732744
chr16	58373620	58374188
chr16	58800818	58801179
chr16	58818705	58818910
chr16	59231583	59232345
chr16	59550648	59551015
chr16	59615460	59616001
chr16	60220442	60220810
chr16	60257146	60257383
chr16	60327363	60327652
chr16	60444141	60444348
chr16	60447154	60447580
chr16	60680465	60680707
chr16	60948690	60949123
chr16	60988310	60988886
chr16	61447116	61447481
chr16	61473228	61474056
chr16	61830100	61830477
chr16	61914356	61915056
chr16	61957101	61957605
chr16	62932673	62933424
chr16	63253957	63254322
chr16	63278502	63278916
chr16	63288292	63288694
chr16	63465497	63465879
chr16	63562602	63563255
chr16	63584438	63584810
chr16	64133019	64133430
chr16	64135266	64135641
chr16	64141706	64142192
chr16	64424854	64425104
chr16	64514330	64514644
chr16	64533409	64533804
chr16	64616911	64617271
chr16	64774843	64775198
chr16	64939065	64939232
chr16	64944791	64945237
chr16	64954593	64955073
chr16	65183556	65183965
chr16	65616097	65616457
chr16	65899421	65899651
chr16	66601497	66601659
chr16	67483178	67483566
chr16	67531251	67532113
chr16	67771318	67771886
chr16	68749961	68750348
chr16	69661562	69661870
chr16	71217220	71217585
chr16	72184805	72185179
chr16	73061479	73061907
chr16	73134047	73134448
chr16	73150212	73150975
chr16	73152348	73152813
chr16	73896621	73897046
chr16	73925078	73925677
chr16	73990509	73991524
chr16	75895169	75895529
chr16	76187368	76188376
chr16	76689668	76689895
chr16	76960066	76960469
chr16	77521480	77521678
chr16	77576136	77577105
chr16	78193116	78193497
chr16	78347723	78348113
chr16	79145443	79145871
chr16	79155454	79155896
chr16	79161205	79161588
chr16	79720139	79720581
chr16	79965647	79965895
chr16	80091187	80091417
chr16	80319484	80319966
chr16	80704326	80704678
chr16	80736965	80737348
chr16	80743908	80744308
chr16	80794581	80794947
chr16	80850935	80851543
chr16	85184479	85184783
chr16	85867009	85867393
chr16	86183803	86184088
chr16	86371791	86372221
chr16	86463828	86464196
chr16	87910167	87910553
chr16	88210547	88210945
chr17	231062	231445
chr17	2412211	2412604
chr17	3635400	3635791
chr17	3636772	3637118
chr17	4244524	4245003
chr17	5561097	5561556
chr17	5938181	5939000
chr17	6340349	6340725
chr17	6962505	6962728
chr17	6976607	6977091
chr17	7212492	7212869
chr17	7268455	7268825
chr17	7392071	7392431
chr17	7426124	7426470
chr17	7888017	7888176
chr17	8030857	8031091
chr17	8233060	8233232
chr17	8262512	8262881
chr17	8504594	8504989
chr17	8569469	8569890
chr17	8923492	8924223
chr17	8950394	8950548
chr17	9055112	9055730
chr17	10583257	10583459
chr17	10616996	10617479
chr17	11089099	11089775
chr17	11359204	11359579
chr17	12011863	12011987
chr17	12403013	12403468
chr17	12771546	12771927
chr17	13428477	13428855
chr17	13892295	13892632
chr17	14259654	14260033
chr17	15112767	15113148
chr17	15228105	15228560
chr17	15782130	15782525
chr17	16164056	16164359
chr17	17427477	17428018
chr17	17434604	17435493
chr17	17628036	17628411
chr17	17712904	17713287
chr17	20097991	20098346
chr17	20101303	20101704
chr17	20451244	20451637
chr17	22699247	22699782
chr17	22706645	22706874
chr17	22758463	22758839
chr17	22791700	22792094
chr17	22902313	22902526
chr17	23700610	23701023
chr17	24254693	24254849
chr17	24762995	24763351
chr17	25130121	25130486
chr17	25301232	25301625
chr17	25386574	25386777
chr17	25392239	25392454
chr17	25406300	25406671
chr17	26009778	26010164
chr17	26228250	26228636
chr17	27843829	27844185
chr17	28299084	28299376
chr17	28503906	28504306
chr17	28620551	28620984
chr17	28624491	28624864
chr17	29035191	29035666
chr17	30697536	30697912
chr17	30785495	30785929
chr17	30827509	30827894
chr17	32072719	32073084
chr17	32180020	32180729
chr17	32278333	32278683
chr17	32281134	32281694
chr17	32295849	32296236
chr17	32432665	32433035
chr17	33274949	33275323
chr17	33800291	33800683
chr17	33976451	33976902
chr17	34161402	34161826
chr17	34435667	34436018
chr17	34436728	34437092
chr17	34527684	34528100
chr17	35732164	35733034
chr17	35946515	35946909
chr17	35948788	35949170
chr17	36160080	36160568
chr17	36316869	36317267
chr17	36554771	36554964
chr17	36557437	36557828
chr17	36672849	36673236
chr17	36976909	36977562
chr17	37146757	37147066
chr17	37363058	37363434
chr17	37588621	37589162
chr17	38168717	38168943
chr17	38995480	38995896
chr17	38996047	38996589
chr17	39538857	39539109
chr17	39569801	39570134
chr17	39696314	39696871
chr17	39981651	39982056
chr17	40075482	40075874
chr17	40341766	40342158
chr17	40422576	40423266
chr17	40424380	40424855
chr17	40428230	40428535
[truncated: 5,172 more rows]

## Sheet: EWS502 FLI1
chr10	361601	363200
chr10	546651	547900
chr10	695251	696500
chr10	735251	736550
chr10	811451	812800
chr10	979901	981400
chr10	1004001	1005500
chr10	1009701	1011000
chr10	1078801	1080350
chr10	1091951	1093500
chr10	1092701	1094150
chr10	1124751	1126300
chr10	1145401	1146950
chr10	1347651	1349200
chr10	1348401	1349900
chr10	1379851	1381100
chr10	1443851	1445150
chr10	1499301	1500600
chr10	1540501	1541900
chr10	1558151	1559550
chr10	1691651	1693000
chr10	1704301	1705700
chr10	1738401	1739650
chr10	1879301	1880800
chr10	1890551	1891950
chr10	1960001	1961550
chr10	1974151	1975600
chr10	2000251	2001800
chr10	2256951	2258750
chr10	2532801	2534800
chr10	2558751	2560200
chr10	2701251	2702750
chr10	2742951	2744200
chr10	2762301	2763650
chr10	2888551	2889950
chr10	2957351	2958950
chr10	3040501	3042000
chr10	3099651	3101650
chr10	3224901	3226350
chr10	3267651	3269050
chr10	3271451	3272750
chr10	3272301	3273550
chr10	3371301	3372800
chr10	3455951	3457650
chr10	3462151	3463600
chr10	3486951	3488600
chr10	3497001	3498500
chr10	3585901	3587150
chr10	3781801	3783150
chr10	3792351	3793750
chr10	3815151	3816500
chr10	3837551	3838800
chr10	3839601	3840850
chr10	3867501	3868850
chr10	3961301	3962700
chr10	4723801	4725150
chr10	5072801	5074300
chr10	5325001	5326800
chr10	5585751	5587050
chr10	5595051	5596300
chr10	5618601	5620100
chr10	5677501	5679000
chr10	6135301	6136750
chr10	6167601	6169150
chr10	6170101	6171500
chr10	6206251	6207600
chr10	6210151	6211700
chr10	6245301	6246650
chr10	6252001	6253500
chr10	6254701	6256050
chr10	6258301	6259650
chr10	6300551	6302100
chr10	6356651	6358200
chr10	6360801	6362400
chr10	6388851	6390150
chr10	6394701	6395950
chr10	6619201	6620700
chr10	7869201	7870600
chr10	7899651	7900950
chr10	7994701	7996000
chr10	8051101	8052600
chr10	8271001	8272300
chr10	8533851	8535250
chr10	8594601	8596050
chr10	11441851	11443250
chr10	11484601	11486000
chr10	11839501	11840750
chr10	11880351	11881950
chr10	11881201	11882650
chr10	11895451	11897050
chr10	11983151	11984400
chr10	12124351	12126100
chr10	12267801	12269250
chr10	12276951	12279200
chr10	12432101	12433350
chr10	12565451	12567100
chr10	12623151	12624600
chr10	12628601	12630050
chr10	12916951	12918650
chr10	13001101	13002450
chr10	13002501	13004150
chr10	13003851	13005500
chr10	13097951	13099300
chr10	13181001	13182400
chr10	13242751	13244000
chr10	13383401	13384950
chr10	13472601	13474150
chr10	13668151	13669700
chr10	13765751	13767450
chr10	13788951	13790350
chr10	13794251	13795800
chr10	13824601	13825950
chr10	13868501	13869900
chr10	13928851	13930100
chr10	14009951	14011500
chr10	14027201	14028600
chr10	14071701	14073250
chr10	14091451	14092750
chr10	14255051	14256400
chr10	14409201	14410600
chr10	14530101	14531550
chr10	14698301	14699900
chr10	14830851	14832100
chr10	14863301	14864750
chr10	14864201	14865550
chr10	15035451	15037200
chr10	15041101	15042800
chr10	15217851	15219150
chr10	15366501	15367950
chr10	15395401	15396750
chr10	15467451	15468900
chr10	15520801	15522500
chr10	15666851	15668250
chr10	15873551	15874900
chr10	15941601	15943400
chr10	16091301	16092800
chr10	16412701	16413950
chr10	16518351	16520250
chr10	16899101	16900550
chr10	16914201	16915650
chr10	17001201	17002450
chr10	17050001	17051400
chr10	17107151	17108600
chr10	17111051	17112350
chr10	17282501	17283850
chr10	17283301	17284550
chr10	17309601	17310850
chr10	17311601	17312950
chr10	17725201	17726600
chr10	18465351	18466750
chr10	18516451	18517900
chr10	18979801	18981450
chr10	18987401	18988900
chr10	19308551	19309950
chr10	19817501	19818750
chr10	20111001	20112350
chr10	20144601	20146050
chr10	20242351	20243750
chr10	20260151	20261600
chr10	20556851	20558300
chr10	20738001	20739350
chr10	21621301	21622700
chr10	21701501	21702850
chr10	21751851	21753100
chr10	21772751	21774200
chr10	21824351	21825650
chr10	21853951	21855400
chr10	21854651	21856000
chr10	21855101	21856750
chr10	21861801	21863350
chr10	22060601	22062050
chr10	22239351	22240700
chr10	22332101	22333550
chr10	22343301	22344550
chr10	22351151	22352400
chr10	22557751	22559200
chr10	22580351	22581850
chr10	22591501	22592750
chr10	22644951	22646350
chr10	22654151	22655700
chr10	22668751	22670000
chr10	22765201	22766750
chr10	22834451	22835900
chr10	22928201	22929650
chr10	22945901	22947300
chr10	22977801	22979200
chr10	22981551	22982950
chr10	23423401	23424950
chr10	23424601	23425850
chr10	23441551	23442800
chr10	23777551	23779000
chr10	23868851	23870250
chr10	24329101	24330400
chr10	24362951	24364450
chr10	24537001	24538350
chr10	24538401	24539700
chr10	24718701	24720200
chr10	25052651	25054150
chr10	25390951	25392250
chr10	26072901	26074300
chr10	26528401	26529800
chr10	26565451	26566700
chr10	26671551	26672900
chr10	27004151	27005650
chr10	27025451	27027100
chr10	27351701	27353000
chr10	27482501	27484200
chr10	27570201	27572000
chr10	27571201	27572800
chr10	27832401	27833750
chr10	27953401	27954650
chr10	28155001	28156300
chr10	28573001	28574450
chr10	28576601	28578150
chr10	28661801	28663100
chr10	28662201	28663450
chr10	28665801	28667100
chr10	28823451	28825200
chr10	28860551	28861850
chr10	28861001	28862600
chr10	29136301	29137900
chr10	29140951	29142550
chr10	29267901	29269500
chr10	29312751	29314300
chr10	29356851	29358150
chr10	29359301	29360600
chr10	29430751	29432200
chr10	29530551	29532500
chr10	29582851	29584450
chr10	29591801	29593050
chr10	29672501	29673900
chr10	29674651	29676050
chr10	29737701	29739000
chr10	29987701	29989050
chr10	30085901	30087150
chr10	30127651	30129000
chr10	30132601	30134000
chr10	30155151	30156500
chr10	30335901	30337300
chr10	30370201	30371550
chr10	30371801	30373200
chr10	30401901	30403350
chr10	30544051	30545600
chr10	30826201	30827550
chr10	30882301	30883750
chr10	31063351	31064700
chr10	31113101	31114450
chr10	31394951	31396550
chr10	31398451	31399950
chr10	31399301	31400600
chr10	31571401	31572800
chr10	31646751	31648050
chr10	31977351	31978650
chr10	32025651	32027150
chr10	32028801	32030050
chr10	32029301	32030600
chr10	32036101	32037650
chr10	32079901	32081150
chr10	32088751	32090100
chr10	32383801	32385050
chr10	32467651	32469150
chr10	32729251	32730750
chr10	32774201	32776200
chr10	33286651	33288150
chr10	33308801	33310600
chr10	33310001	33311550
chr10	33663051	33664750
chr10	33747801	33749150
chr10	33990051	33991800
chr10	34259401	34260700
chr10	34353351	34354900
chr10	34430551	34432100
chr10	34441801	34443150
chr10	34510601	34511850
chr10	34569001	34570400
chr10	34965001	34966500
chr10	34966851	34968250
chr10	35109151	35110800
chr10	35219351	35220850
chr10	35250601	35251900
chr10	35418801	35420350
chr10	35519901	35521300
chr10	35597501	35599000
chr10	35707551	35709100
chr10	35715201	35716600
chr10	35792101	35793700
chr10	35846051	35847350
chr10	35970501	35971750
chr10	35972851	35974100
chr10	35980501	35981900
chr10	36200601	36201850
chr10	36218451	36219950
chr10	36227451	36228950
chr10	36322601	36324050
chr10	36470251	36471600
chr10	36500951	36502400
chr10	36695701	36697250
chr10	36867351	36868850
chr10	36908751	36910200
chr10	36964751	36966300
chr10	37130751	37132000
chr10	37432701	37434300
chr10	38338651	38340100
chr10	42290451	42291900
chr10	42597251	42598950
chr10	42598101	42599550
chr10	42645201	42646450
chr10	42690401	42692250
chr10	42859551	42861000
chr10	42897651	42899150
chr10	42898701	42899950
chr10	42909001	42910450
chr10	43065901	43067250
chr10	43212151	43213650
chr10	43223851	43225200
chr10	43270251	43271500
chr10	43389351	43390850
chr10	43464001	43465400
chr10	43661201	43662750
chr10	43725151	43726700
chr10	43759451	43760900
chr10	43780001	43781350
chr10	43783801	43785250
chr10	44463151	44464600
chr10	44464901	44466350
chr10	44672601	44673950
chr10	44717801	44719300
chr10	44728201	44729600
chr10	44728701	44730100
chr10	44793751	44795000
chr10	44816401	44817800
chr10	44873551	44874800
chr10	44906901	44908250
chr10	44911051	44912500
chr10	45235301	45236900
chr10	46371151	46372550
chr10	46394051	46395500
chr10	46549551	46550800
chr10	48061951	48063400
chr10	48069801	48071100
chr10	48182801	48184150
chr10	48183801	48185100
chr10	48192551	48194050
chr10	49109901	49111200
chr10	49269201	49270450
chr10	49387001	49388600
chr10	49677801	49679300
chr10	49777851	49779250
chr10	49845851	49847100
chr10	49916751	49918150
chr10	50065751	50067250
chr10	50132101	50133550
chr10	50205901	50207250
chr10	50417001	50418400
chr10	50473201	50474700
chr10	50484301	50485800
chr10	50525101	50526550
chr10	50719401	50720800
chr10	51167951	51169400
chr10	51234901	51236350
chr10	51733901	51735250
chr10	52053601	52054850
chr10	52168901	52170750
chr10	52745951	52747200
chr10	53128501	53130300
chr10	53161301	53162550
chr10	53737551	53738800
chr10	53895801	53897050
chr10	54500351	54501800
chr10	54556051	54557300
chr10	55365201	55366500
chr10	58580401	58581650
chr10	59053651	59055000
chr10	59494801	59496050
chr10	59696301	59697600
chr10	59814601	59815900
chr10	60606401	60607750
chr10	60861401	60862850
chr10	61336201	61337500
chr10	61604751	61606000
chr10	61779851	61781200
chr10	61795701	61797100
chr10	61814001	61815500
chr10	61876101	61877500
chr10	62196901	62198400
chr10	62207351	62208600
chr10	62272001	62273500
chr10	62781301	62782600
chr10	62826901	62828150
chr10	62901601	62902950
chr10	62907001	62908600
chr10	62928051	62929300
chr10	63091801	63093200
chr10	63259451	63260850
chr10	63329451	63330900
chr10	63333101	63334600
chr10	63584601	63586000
chr10	63624601	63626150
chr10	63873151	63874700
chr10	63984851	63986150
chr10	64011951	64013450
chr10	64119051	64120400
chr10	64189701	64191150
chr10	64233601	64235050
chr10	64387951	64389200
chr10	64406951	64408250
chr10	64690051	64691400
chr10	64702851	64704150
chr10	64950151	64951400
chr10	65057001	65058500
chr10	65057951	65059300
chr10	65058551	65060100
chr10	65071201	65072600
chr10	65099601	65100900
chr10	65101651	65103100
chr10	65120151	65121500
chr10	65141651	65142950
chr10	65142601	65143850
chr10	65466201	65467700
chr10	66038801	66040200
chr10	66719251	66720750
chr10	66999551	67001400
chr10	67340751	67342150
chr10	67436951	67438400
chr10	67518551	67519800
chr10	67695201	67696550
chr10	68418051	68419350
chr10	68536951	68538250
chr10	69193451	69195000
chr10	69278551	69280200
chr10	69504301	69505550
chr10	69516901	69518350
chr10	69761801	69763300
chr10	69956801	69958100
chr10	70029351	70030700
chr10	70330201	70331800
chr10	70385051	70386650
chr10	70552801	70554350
chr10	70654601	70655900
chr10	70713751	70715000
chr10	70748651	70750000
chr10	70765001	70766250
chr10	70778601	70779950
chr10	70835401	70837150
chr10	70890651	70891900
chr10	70909151	70910750
chr10	70927351	70928650
chr10	71080201	71081800
chr10	71121551	71122900
chr10	71151201	71152650
chr10	71187001	71188700
chr10	71203601	71205100
chr10	71230651	71232100
chr10	71251301	71252800
chr10	71298501	71299900
chr10	71337351	71338650
chr10	71470351	71471750
chr10	71506051	71507500
chr10	71725801	71727200
chr10	71760751	71762300
chr10	71793651	71795150
chr10	71906901	71908200
chr10	71907501	71909000
chr10	71909451	71910900
chr10	71911451	71912850
chr10	71955901	71957300
chr10	72045501	72046800
chr10	72120001	72121250
chr10	72122051	72123500
chr10	72127401	72129050
chr10	72315501	72316950
chr10	72359551	72360800
chr10	72361601	72363150
chr10	72438451	72439700
chr10	72444801	72446300
chr10	72646301	72647800
chr10	72646851	72648100
chr10	72665451	72667000
chr10	72691251	72692700
chr10	72854301	72855950
chr10	72864701	72866250
chr10	72904401	72906050
chr10	72950701	72952000
chr10	72990551	72991800
chr10	72993751	72995050
chr10	73014751	73016250
chr10	73095501	73097050
chr10	73178151	73179400
chr10	73318051	73319300
chr10	73394401	73395950
chr10	73408051	73409400
chr10	73438701	73440100
chr10	73473451	73474800
chr10	73488251	73489800
chr10	73499451	73501050
chr10	73677601	73679300
chr10	73726301	73728150
chr10	73737601	73739100
chr10	73748501	73749900
chr10	73793551	73794950
chr10	74121901	74123350
chr10	74316251	74317900
chr10	74525101	74526600
chr10	74597001	74598500
chr10	74617801	74619250
chr10	74681701	74683150
chr10	74843451	74844750
chr10	75159451	75161000
chr10	75173051	75174900
chr10	75211351	75212800
chr10	75214551	75215950
chr10	75395451	75396700
chr10	75428401	75429650
chr10	76168251	76169700
chr10	76335851	76337350
chr10	76710551	76711900
chr10	76723151	76725400
chr10	77647301	77648750
chr10	77681301	77682650
chr10	77738451	77739700
chr10	78470801	78472250
chr10	78780051	78781300
chr10	78822151	78823400
chr10	78961001	78962350
chr10	79032251	79033700
chr10	79265551	79267000
chr10	79305851	79307200
chr10	79306951	79308600
chr10	79458601	79460150
chr10	79482401	79483850
chr10	79482951	79484300
chr10	79604951	79606400
chr10	79921201	79922450
chr10	80129601	80131050
chr10	80184151	80185400
chr10	80186051	80187300
chr10	80403251	80404900
chr10	80481501	80482750
chr10	80532351	80533850
chr10	80607801	80609200
chr10	80667051	80668400
chr10	80671101	80673250
chr10	80832851	80834250
chr10	80833451	80835000
chr10	80873601	80874850
chr10	81654001	81655350
chr10	81796051	81797400
chr10	81907801	81909300
chr10	81954801	81956300
chr10	82162551	82163850
chr10	82258901	82260350
chr10	82276001	82277500
chr10	82278751	82280200
chr10	82291951	82293350
chr10	82411901	82413400
chr10	82413351	82414600
chr10	82518951	82520250
chr10	82821551	82822800
chr10	82822401	82823800
chr10	84359051	84360500
chr10	85157601	85159000
chr10	85732801	85734250
chr10	86014001	86015250
chr10	86016801	86018200
chr10	86045701	86047300
chr10	86058051	86059300
chr10	86173851	86175400
chr10	86924851	86926350
chr10	86994051	86995450
chr10	88160551	88162100
chr10	88270201	88271450
chr10	88460201	88461500
chr10	88497051	88498300
chr10	88617501	88619150
chr10	88622151	88623400
chr10	88703501	88705050
chr10	88704651	88706200
chr10	88807201	88808650
chr10	89462451	89463900
chr10	89567151	89568700
chr10	89604051	89605450
chr10	90629151	90630600
chr10	90629651	90631350
chr10	90630451	90631850
chr10	90701001	90702500
chr10	90735751	90737200
chr10	90739551	90741050
chr10	90740351	90741900
chr10	90836101	90837600
chr10	90974301	90975750
chr10	91077101	91078800
chr10	91097251	91098500
chr10	91268601	91270150
chr10	91394651	91396000
chr10	92680201	92681750
chr10	92781901	92783150
chr10	92783251	92784600
chr10	92783951	92785450
chr10	92827101	92828350
chr10	93087351	93088750
chr10	93090051	93091650
chr10	93158501	93160100
chr10	93357801	93359250
chr10	93421601	93423000
chr10	93672701	93674150
chr10	94040001	94041450
chr10	94180201	94181650
chr10	94439851	94441450
chr10	94448751	94450300
chr10	94580101	94581700
chr10	94887401	94888850
chr10	94948351	94949800
chr10	95080251	95082050
chr10	95161851	95163450
chr10	95162501	95164000
chr10	95212051	95213700
chr10	95291701	95293050
chr10	95451751	95453200
chr10	95538451	95539750
chr10	95882501	95883900
chr10	95953901	95955200
chr10	96111951	96113450
chr10	97083751	97085100
chr10	97310901	97312150
chr10	97443301	97444750
chr10	97478501	97479950
chr10	97491451	97492900
chr10	97565001	97566550
chr10	97839151	97840750
chr10	97870601	97872000
chr10	97873801	97875200
chr10	97878901	97880900
chr10	98246501	98247950
chr10	98335301	98337000
chr10	98336501	98337850
chr10	98436801	98438350
chr10	98470101	98471450
chr10	98507851	98509100
chr10	98550601	98552300
chr10	98628701	98630150
chr10	98845351	98846650
chr10	99041301	99042650
chr10	99082051	99083450
chr10	99249351	99250750
chr10	99291451	99292850
chr10	99292301	99293800
chr10	99390501	99391750
chr10	99463851	99465300
chr10	99618551	99620050
chr10	99645101	99646650
chr10	99690301	99691600
chr10	99883801	99885650
chr10	100098701	100100200
chr10	100100551	100101950
chr10	100102451	100103750
chr10	100164401	100165650
chr10	100216801	100218100
chr10	100983551	100984800
chr10	101153051	101154350
chr10	101299901	101301250
chr10	101359751	101361000
chr10	101481051	101482350
chr10	101676201	101677550
chr10	101732601	101733900
chr10	101755751	101757050
chr10	101793051	101794400
chr10	101935351	101936850
chr10	101978801	101980250
chr10	102123001	102124450
chr10	102284901	102286550
chr10	102404801	102406350
chr10	102430551	102431850
chr10	102436801	102438200
chr10	102481301	102482550
chr10	102483401	102484700
chr10	102486801	102488350
chr10	102491001	102492250
chr10	102563951	102565450
chr10	102565851	102567350
chr10	102575101	102576550
chr10	102662051	102663300
chr10	102810851	102812150
chr10	102812651	102814300
chr10	102817001	102818450
chr10	102836901	102838700
chr10	102884351	102885800
chr10	102963051	102964300
chr10	102965651	102966950
chr10	103102901	103104400
chr10	103235301	103236750
chr10	103239301	103240600
chr10	103307551	103308800
chr10	103443951	103445350
chr10	103567451	103568850
chr10	103575601	103577050
chr10	103597651	103599100
chr10	103870351	103871600
chr10	103901301	103902700
chr10	103975051	103976400
chr10	104143101	104144550
chr10	104328501	104329950
chr10	104329651	104331100
chr10	104348951	104350500
chr10	104361201	104362700
chr10	104362201	104363450
chr10	104395451	104397050
chr10	104488051	104489300
chr10	104493001	104494250
chr10	104525101	104526550
chr10	104552301	104553700
chr10	104603251	104604850
chr10	104638701	104640100
chr10	104941551	104942950
chr10	105145601	105147100
chr10	105489801	105491350
chr10	105506951	105508250
chr10	105508101	105509650
chr10	105513001	105514400
chr10	105544951	105546400
chr10	105561651	105563200
chr10	105595201	105596700
chr10	105657451	105659000
chr10	105667101	105668550
chr10	105771251	105772700
chr10	105870751	105872100
chr10	105871401	105872650
chr10	106003851	106005300
chr10	106017801	106019400
chr10	106048251	106049500
chr10	106080551	106082200
chr10	106086701	106088300
chr10	106087551	106089250
chr10	106357201	106358750
chr10	108300251	108301650
chr10	108331501	108332850
chr10	108397751	108399100
chr10	108667151	108668450
chr10	108707851	108709100
chr10	108914301	108915650
chr10	109121201	109122600
chr10	109284501	109285800
chr10	110270901	110272450
chr10	110343451	110345050
chr10	110940701	110942150
chr10	111188701	111189950
chr10	111716551	111717800
chr10	111756051	111757300
chr10	111891251	111892750
chr10	111919801	111921300
chr10	111925601	111926900
chr10	112054101	112055800
chr10	112060051	112061300
chr10	112141501	112143650
chr10	112147651	112149150
chr10	112250451	112251750
chr10	112277101	112278350
chr10	112383951	112385400
chr10	112425351	112426700
chr10	112428701	112430150
chr10	112479901	112481350
chr10	112508151	112509500
chr10	112596351	112597600
chr10	112668301	112669750
chr10	113016901	113018300
chr10	113831351	113832900
chr10	114111101	114112600
chr10	114138501	114139750
chr10	114195451	114197700
chr10	114657701	114659250
chr10	114660801	114662300
chr10	114698901	114700300
chr10	114701001	114702500
chr10	114786351	114787750
chr10	114808001	114809400
chr10	114809801	114811250
chr10	114842951	114844550
chr10	114870401	114871650
chr10	114970901	114972500
chr10	115022401	115024200
chr10	115272051	115273600
chr10	115276301	115277900
chr10	115288651	115289900
chr10	115429851	115431300
chr10	115460551	115462000
chr10	115603351	115604750
chr10	115603801	115605100
chr10	115735051	115736500
chr10	115748751	115750250
chr10	115752251	115753750
chr10	115792201	115793600
chr10	115993151	115994400
chr10	116056801	116058250
chr10	116275751	116277350
chr10	116402151	116403450
chr10	116433501	116435050
chr10	116624101	116625700
chr10	116753501	116754800
chr10	117688051	117689500
chr10	118431251	118432600
chr10	118440951	118442250
chr10	118536851	118538400
chr10	118545901	118547150
chr10	118642301	118643750
chr10	118839601	118841050
chr10	118845951	118847200
chr10	118881051	118882350
chr10	118881651	118883750
chr10	118883601	118885300
chr10	118885701	118887150
chr10	118923801	118925250
chr10	118943401	118944650
chr10	119191251	119192550
chr10	119225701	119227150
chr10	119307301	119308850
chr10	119318901	119320400
chr10	119545251	119546550
chr10	119579801	119581350
chr10	119629751	119631250
chr10	119865501	119867000
chr10	119876901	119878250
chr10	120090751	120092500
chr10	120127451	120128850
chr10	120280051	120281650
chr10	120581151	120582550
chr10	120913751	120915000
chr10	120955151	120956850
chr10	120957151	120958400
chr10	120986551	120988450
chr10	121070301	121071550
chr10	121085001	121086500
chr10	121093651	121095100
chr10	121095301	121096600
chr10	121154301	121155750
chr10	121369801	121371100
chr10	121399801	121401050
chr10	121536401	121537950
chr10	121641151	121642950
chr10	122600001	122601750
chr10	122692051	122693300
chr10	123677101	123678400
chr10	123897501	123898800
chr10	124043551	124044800
chr10	124090351	124091700
chr10	124223001	124224500
chr10	124628101	124629500
chr10	124703001	124704500
chr10	124881851	124883100
chr10	124903101	124904350
chr10	124990851	124992200
chr10	125803001	125804350
chr10	125911051	125912500
chr10	125945351	125946750
chr10	126019151	126020500
chr10	126032751	126034250
chr10	126400901	126402150
chr10	126588551	126589950
chr10	126836601	126837950
chr10	127304701	127306250
chr10	127362551	127364100
chr10	127501301	127502650
chr10	127573501	127575000
chr10	127574851	127576150
chr10	127719701	127721250
chr10	127721451	127723050
chr10	127795201	127796650
chr10	127834601	127836000
chr10	127914451	127916050
chr10	128141401	128142700
chr10	128769551	128771000
chr10	128813151	128814550
chr10	128958101	128959400
chr10	129674301	129675750
chr10	129675201	129676600
chr10	129750751	129752200
chr10	129962701	129964200
chr10	130025501	130026800
chr10	130214501	130215950
chr10	130227601	130229200
chr10	130294951	130296200
chr10	130719251	130720800
chr10	130730501	130731800
chr10	130828601	130829850
chr10	130853501	130855000
chr10	130959951	130961300
chr10	130981851	130983100
chr10	131019151	131020700
chr10	131184751	131186100
chr10	131316401	131318000
chr10	131637701	131639350
chr10	131638951	131640200
chr10	131646201	131647550
chr10	131647801	131649100
chr10	131658151	131659600
chr10	132112351	132113750
chr10	132236101	132237450
chr10	132254751	132256050
chr10	132293601	132295100
chr10	132319201	132320650
chr10	132444451	132446100
chr10	132556901	132558400
chr10	132723751	132725100
chr10	132998251	132999700
chr10	133009051	133010400
chr10	133011451	133013050
chr10	133370451	133371950
chr10	133388301	133389800
chr10	133624751	133626150
chr10	133635651	133637000
chr10	133686051	133687350
chr10	133705001	133706350
chr10	133795301	133796700
chr10	133992801	133994250
chr10	134074451	134076150
chr10	134197651	134198900
chr10	134251201	134252900
chr10	134330351	134331750
chr10	134363351	134364900
chr10	134456751	134458200
chr10	134542151	134543450
chr10	134685701	134687100
chr10	134755551	134757000
chr11	226301	227700
chr11	297551	298800
chr11	316501	317800
chr11	404451	405900
chr11	1280001	1281300
chr11	1368751	1370200
chr11	1439701	1441050
chr11	1566451	1567700
chr11	2377451	2379000
chr11	2789501	2791000
chr11	2875951	2877350
chr11	3029551	3030800
chr11	3356301	3357600
chr11	3781501	3782850
chr11	3871501	3872800
chr11	4075401	4076850
chr11	6362501	6364050
chr11	6367101	6368500
chr11	6451451	6452750
chr11	6458651	6460100
chr11	6545801	6547050
chr11	6554001	6555500
chr11	6589651	6590950
chr11	6612751	6614400
chr11	6624001	6625600
chr11	6624751	6626000
chr11	7555101	7556600
chr11	7964551	7966000
chr11	8185101	8186550
chr11	8260601	8261850
chr11	8260901	8262250
chr11	8590551	8591850
chr11	8666301	8667850
chr11	8692951	8694300
chr11	8792601	8793900
chr11	8843151	8844400
chr11	8891851	8893100
chr11	9008201	9009700
chr11	9098251	9099700
chr11	9134251	9135750
chr11	9292451	9293700
chr11	9341601	9343250
chr11	9438301	9439800
chr11	10285801	10287050
chr11	10392201	10393650
chr11	10433501	10434800
chr11	10534101	10535600
chr11	10583601	10585150
chr11	10601101	10602550
chr11	10603001	10604450
chr11	10728601	10730000
chr11	10785251	10786750
chr11	10835351	10836700
chr11	11513251	11514700
chr11	11954851	11956300
chr11	11957001	11958250
chr11	12044251	12046000
chr11	12163451	12164950
chr11	12167101	12168600
chr11	12355751	12357100
chr11	12654751	12656200
chr11	12671401	12672900
chr11	12702051	12703350
chr11	12805651	12806950
chr11	12863401	12864800
chr11	13440151	13441650
chr11	13722751	13724150
chr11	14337351	14338600
chr11	14868651	14870100
chr11	15052101	15053550
chr11	15211101	15212550
chr11	15276351	15277750
chr11	15285151	15286750
chr11	15628851	15630100
chr11	15820851	15822450
chr11	16103301	16104650
chr11	16327101	16328600
chr11	16351251	16352750
chr11	16584201	16585550
chr11	16591151	16592400
chr11	17055101	17056500
chr11	17135501	17136800
chr11	17187001	17188400
chr11	17254801	17256050
chr11	17699651	17701050
chr11	17851201	17852650
chr11	17990951	17992200
chr11	18361001	18362350
chr11	18373851	18375100
chr11	18504301	18505900
chr11	18566101	18567750
chr11	18786651	18788150
chr11	18949901	18951400
chr11	19555051	19557000
chr11	19573901	19575200
chr11	20256101	20257450
chr11	22469601	22470850
chr11	22602551	22604150
chr11	22603251	22604600
chr11	22807551	22808950
chr11	23760501	23761750
chr11	25944751	25946000
chr11	27193301	27194650
chr11	27193801	27195250
chr11	27407451	27408700
chr11	27637101	27638450
chr11	28085601	28087050
chr11	30150401	30151950
chr11	30300451	30301800
chr11	30366051	30367600
chr11	30542801	30544050
chr11	30561801	30563250
chr11	30790401	30791800
chr11	31347251	31348750
chr11	32398451	32399900
chr11	32869851	32871150
chr11	33138951	33140200
chr11	33235851	33237450
chr11	33669551	33670900
chr11	33814901	33816400
chr11	33847451	33848950
chr11	33848351	33849650
chr11	33876951	33878200
chr11	33912051	33913550
chr11	33919151	33920500
chr11	34023651	34025100
chr11	34416051	34417300
chr11	34787301	34788550
chr11	35595351	35596700
chr11	35773701	35775250
chr11	35829651	35831200
chr11	36143401	36144750
chr11	36177151	36178400
chr11	36326851	36328400
chr11	36351451	36352900
chr11	36728851	36730350
chr11	36898901	36900150
chr11	36926601	36927900
chr11	36952301	36953900
chr11	37255651	37257150
chr11	38379851	38381350
chr11	39436101	39437550
chr11	40271501	40272800
chr11	41475551	41477000
chr11	41829801	41831250
chr11	42384851	42386350
chr11	42664851	42666250
chr11	43336201	43337450
chr11	43664951	43666450
chr11	43766201	43767450
chr11	43858201	43859450
chr11	43966901	43968300
chr11	44043801	44045200
chr11	44164401	44165700
chr11	44268601	44269850
chr11	44270751	44272000
chr11	44300501	44301950
chr11	44301151	44302600
chr11	44359751	44361250
chr11	44487101	44488350
chr11	44502501	44503900
chr11	44546751	44548200
chr11	44580551	44582000
chr11	44600901	44602500
chr11	44629451	44630850
chr11	44678201	44679500
chr11	44687551	44689200
chr11	44702951	44704300
chr11	44766451	44767800
chr11	44824601	44826050
chr11	44932551	44934100
chr11	44955301	44956750
chr11	44958301	44959550
chr11	45023901	45025200
chr11	45057851	45059200
chr11	45187401	45189150
chr11	45213401	45214700
chr11	45332951	45334250
chr11	45538701	45539950
chr11	45581551	45583200
chr11	45660851	45662350
chr11	46097201	46098500
chr11	46098101	46099850
chr11	46257551	46258800
chr11	46316801	46318150
chr11	46319751	46321350
chr11	46594901	46596300
chr11	46654301	46655900
chr11	46677701	46679850
chr11	46882551	46883800
chr11	46890151	46891850
chr11	46894101	46895750
chr11	46896701	46898250
chr11	46914251	46915500
chr11	47226351	47227800
chr11	47232401	47233800
chr11	47246351	47248200
chr11	47393851	47395100
chr11	47444201	47445800
chr11	47556301	47557900
chr11	47745951	47747350
chr11	47924601	47925850
chr11	48044601	48046200
chr11	48147201	48148550
chr11	49185601	49187550
chr11	49244651	49245950
chr11	54945351	54946900
chr11	55570951	55572350
chr11	56647101	56648600
chr11	56737051	56738500
chr11	56768301	56769750
chr11	56793051	56794550
chr11	56839151	56840550
chr11	56892051	56893400
chr11	56899001	56900450
chr11	56930051	56931600
chr11	56948251	56950100
chr11	56997001	56998450
chr11	57004901	57006350
chr11	57033151	57034450
chr11	57054051	57055700
chr11	57061701	57063300
chr11	57162901	57164500
chr11	57180651	57182050
chr11	57181151	57182600
chr11	57190701	57192150
chr11	57264651	57266300
chr11	57302051	57303300
chr11	57315801	57317150
chr11	58101051	58102950
chr11	58102001	58103300
chr11	58103051	58104550
chr11	58666201	58667550
chr11	58721651	58723050
chr11	58998751	59000000
chr11	59060851	59062300
chr11	59073901	59075400
chr11	59080801	59082300
chr11	59089151	59090500
chr11	59089551	59091100
chr11	59125101	59126350
chr11	59192801	59194250
chr11	59277701	59279050
chr11	59334151	59335600
chr11	59469201	59470700
chr11	60428751	60430150
chr11	60430051	60431350
chr11	60546201	60547600
chr11	60856851	60858200
chr11	60859701	60860950
chr11	60885801	60887100
chr11	60953501	60955000
chr11	61029051	61030600
chr11	61177801	61179300
chr11	61316001	61317450
chr11	61376701	61378250
chr11	61445951	61447750
chr11	61467501	61469000
chr11	61474051	61475400
chr11	61549301	61550600
chr11	61556951	61558600
chr11	61963651	61965050
chr11	61967951	61969200
chr11	62036251	62037750
chr11	62068201	62069450
chr11	62076851	62078300
chr11	62079151	62080450
chr11	62098201	62099750
chr11	62114801	62116400
chr11	62122901	62124200
chr11	62145701	62147000
chr11	62176851	62178100
chr11	62194801	62196250
chr11	62202451	62203950
chr11	62251951	62253600
chr11	62285051	62286350
chr11	62315501	62316800
chr11	62330401	62331850
chr11	62414601	62416200
chr11	62668801	62670300
chr11	63029051	63030850
chr11	63034401	63036100
chr11	63301851	63303250
chr11	63319951	63321250
chr11	63391951	63393400
chr11	63393201	63394600
chr11	63426151	63427600
chr11	63430801	63432100
chr11	63440951	63442450
chr11	63497951	63499250
chr11	63525651	63527000
chr11	63618801	63620050
chr11	63729851	63731350
chr11	63730951	63732850
chr11	63793401	63794850
chr11	63840951	63842500
chr11	63919451	63921150
chr11	63972051	63973300
chr11	64135301	64136850
chr11	64268651	64270050
chr11	64302551	64304050
chr11	64325251	64326600
chr11	64326951	64328300
chr11	64513651	64515050
chr11	64619501	64620850
chr11	64641101	64642450
chr11	64658051	64659350
chr11	64745901	64747350
chr11	64814251	64815750
chr11	64880601	64882050
chr11	64905951	64907800
chr11	64907851	64909250
chr11	64942301	64943950
chr11	64943451	64944850
chr11	64944601	64946100
chr11	64945351	64946600
chr11	64946001	64947350
chr11	65022301	65023850
chr11	65032051	65033300
chr11	65097901	65099300
chr11	65134901	65136500
chr11	65163651	65165000
chr11	65235251	65236800
chr11	65327251	65328500
chr11	65383801	65385100
chr11	65394251	65395500
chr11	65415151	65416650
chr11	65525501	65527150
chr11	65539051	65540350
chr11	65555451	65556750
chr11	65737851	65739300
chr11	65780651	65781900
chr11	65841401	65842700
chr11	65852001	65853350
chr11	65871501	65872850
chr11	65895801	65897100
chr11	66003851	66005250
chr11	66140851	66142150
chr11	66162551	66163800
chr11	66250751	66252300
chr11	66379351	66380850
chr11	66475601	66476950
chr11	66491251	66493250
chr11	66511351	66512700
chr11	66600501	66601800
chr11	66763101	66764350
chr11	66763601	66764850
chr11	66786201	66787750
chr11	66793601	66795350
chr11	66795251	66796550
chr11	66800951	66802450
chr11	66811801	66813150
chr11	66925601	66926900
chr11	67006501	67007900
chr11	67645701	67647200
chr11	67776901	67778350
chr11	67851801	67853150
chr11	67897501	67899200
chr11	67903801	67905300
chr11	67960901	67962250
chr11	68230451	68232000
chr11	68362501	68364050
chr11	68363551	68364850
chr11	68379301	68380550
chr11	68654101	68655550
chr11	68820501	68822650
chr11	68835251	68837000
chr11	69061851	69064200
chr11	69145401	69146850
chr11	69509651	69511050
chr11	69540351	69541600
chr11	69595551	69597000
chr11	69596151	69597800
chr11	69597001	69598500
chr11	69619051	69620350
chr11	69651401	69652950
chr11	69890251	69891650
chr11	70193751	70195150
chr11	70349601	70350950
chr11	70629301	70630850
chr11	70726601	70728050
chr11	70774501	70775800
chr11	70778951	70780400
chr11	70840351	70841950
chr11	71386851	71388250
chr11	71393501	71394750
chr11	71468701	71470350
chr11	71500801	71502250
chr11	71611551	71612800
chr11	72110201	72111800
chr11	72124601	72125900
chr11	72124951	72126200
chr11	72530551	72531800
chr11	72531251	72532500
chr11	72538001	72539550
chr11	72555851	72557200
chr11	72617851	72619100
chr11	72676901	72678150
chr11	72680601	72682100
chr11	72776751	72778300
chr11	73053451	73054850
chr11	73175951	73177200
chr11	73558901	73560600
chr11	73709851	73711350
chr11	73817601	73818900
chr11	73856651	73858100
chr11	73874951	73876350
chr11	74059901	74061200
chr11	74531251	74532800
chr11	74548501	74549950
chr11	74549651	74550900
chr11	74583401	74585000
chr11	74725451	74726800
chr11	74728751	74730400
chr11	74744851	74746300
chr11	74787451	74788850
chr11	74862551	74864050
chr11	74864051	74865300
chr11	74946451	74947950
chr11	74947201	74948600
chr11	74950651	74952800
chr11	74970651	74972000
chr11	75623901	75625200
chr11	75626051	75627300
chr11	75644451	75645800
chr11	75727401	75728900
chr11	75796601	75798100
chr11	75965351	75966600
chr11	75966551	75968100
chr11	75976251	75978200
chr11	76017651	76019050
chr11	76156651	76158600
chr11	76170951	76172350
chr11	76195051	76196350
chr11	76211901	76213150
chr11	76273551	76275000
chr11	76455451	76456800
chr11	76461751	76463200
chr11	76520151	76521400
chr11	76555651	76557100
chr11	76563901	76565350
chr11	76735301	76736750
chr11	76765851	76767400
chr11	76890101	76891350
chr11	77025851	77027200
chr11	77208901	77210200
chr11	77352751	77354050
chr11	77382601	77384400
chr11	77428101	77429650
chr11	77739001	77740250
chr11	77808451	77810300
chr11	78174201	78175650
chr11	78189551	78190900
chr11	78197001	78198550
chr11	78432551	78433800
chr11	80410701	80412200
chr11	81392201	81393550
chr11	82138901	82140350
chr11	82272001	82273450
chr11	82289701	82291200
chr11	82396101	82397500
chr11	82581601	82583100
chr11	82582201	82583450
chr11	82582501	82583850
chr11	82673801	82675350
chr11	82674551	82675850
chr11	83060201	83061500
chr11	83122351	83123800
chr11	83135301	83136650
chr11	83214101	83215600
chr11	83716401	83717650
chr11	84331351	84332750
chr11	85016351	85017650
chr11	85243201	85244700
chr11	85376601	85378000
chr11	85456151	85457650
chr11	85457101	85458600
chr11	85539701	85541250
chr11	85632701	85634250
chr11	85690151	85691650
chr11	85776201	85777650
chr11	85849501	85850950
chr11	85903901	85905250
chr11	86344101	86345650
chr11	86583301	86584750
chr11	86742051	86743550
chr11	86754701	86756000
chr11	86756901	86758500
chr11	87064001	87065250
chr11	87510751	87512000
chr11	87710051	87711300
chr11	87710601	87712000
chr11	88107701	88109150
chr11	88815051	88816500
chr11	89506651	89508000
chr11	89595151	89596800
chr11	89622051	89623350
chr11	90767001	90768250
chr11	90874251	90875700
chr11	91500901	91502150
chr11	91958001	91959400
chr11	92138101	92139950
chr11	92213301	92214550
chr11	92350951	92352500
chr11	92651101	92652500
chr11	92901201	92902600
chr11	92901751	92903150
chr11	92915751	92917200
chr11	92958001	92959400
chr11	93034351	93035600
chr11	93113301	93114550
chr11	93113651	93114900
chr11	93114001	93115300
chr11	93156301	93157700
chr11	93500501	93502300
chr11	93916151	93917500
chr11	94024501	94025900
chr11	94039551	94041000
chr11	94104851	94106450
chr11	94106801	94108300
chr11	94148951	94150300
chr11	94157801	94159300
chr11	94298801	94300450
chr11	94307051	94308550
chr11	94310901	94312150
chr11	94345901	94347350
chr11	94447251	94448600
chr11	94480451	94482050
chr11	94708351	94709800
chr11	94709651	94711300
chr11	95161901	95163350
chr11	95296151	95297650
chr11	95434701	95435950
chr11	95448651	95449900
chr11	95528151	95529650
chr11	95533751	95535050
chr11	95535151	95536500
chr11	95615201	95616900
chr11	95679901	95681150
chr11	95686951	95688200
chr11	95761451	95763100
chr11	96946301	96947600
chr11	98331251	98332600
chr11	98692101	98693550
chr11	99470001	99471450
chr11	99600751	99602150
chr11	100317551	100318900
chr11	100324951	100326400
chr11	100910601	100911850
chr11	101422501	101423750
chr11	101424501	101425750
chr11	101485701	101487150
chr11	101486651	101488450
chr11	101722001	101724100
chr11	101828251	101829800
chr11	102016351	102017850
chr11	102105901	102107150
chr11	102297251	102298700
chr11	102346801	102348250
chr11	102371751	102373050
chr11	102433051	102434300
chr11	102467401	102468950
chr11	102484851	102486300
chr11	103012151	103013400
chr11	103539151	103540600
chr11	104104351	104105650
chr11	104532101	104533600
chr11	104978051	104979350
chr11	105196801	105198250
chr11	105311201	105312650
chr11	106052551	106053800
chr11	106332501	106334000
chr11	106833101	106834600
chr11	106940601	106942350
chr11	107001701	107003250
chr11	107232201	107234000
chr11	107597551	107599200
chr11	107598301	107599800
chr11	107842551	107844100
chr11	107872951	107874500
chr11	108722601	108724300
chr11	108956501	108957900
chr11	108962151	108963650
chr11	109071651	109072900
chr11	109220901	109222150
chr11	109319301	109320700
chr11	109346601	109348000
chr11	109444701	109446200
chr11	109451701	109453000
chr11	109452051	109453450
chr11	109550951	109552200
chr11	109671001	109672250
chr11	109730101	109731650
chr11	109738601	109740100
chr11	109773351	109774700
chr11	109783301	109784550
chr11	109897651	109899050
chr11	110033301	110034550
chr11	110053951	110055200
chr11	110088351	110089650
chr11	110088751	110090150
chr11	110153251	110154650
chr11	110249601	110251100
chr11	110258901	110260550
chr11	110351101	110352550
chr11	110605851	110607100
chr11	110728401	110729650
chr11	110821851	110823400
chr11	110831401	110832650
chr11	110917151	110918850
chr11	111021201	111022450
chr11	111141901	111143300
chr11	111254601	111255850
chr11	111294101	111295650
chr11	111449351	111450850
chr11	111461851	111463500
chr11	111503751	111505550
chr11	111510051	111511300
chr11	111601401	111602750
chr11	111667551	111668950
chr11	111709751	111711500
chr11	111874701	111876300
chr11	111954551	111956000
chr11	112160651	112161900
chr11	112209651	112211000
chr11	112211501	112212800
chr11	112336851	112338150
chr11	112420501	112422100
chr11	112618551	112619950
chr11	112757101	112758450
chr11	112759951	112761300
chr11	113081301	113082750
chr11	113153551	113154950
chr11	113253051	113254550
chr11	113350101	113351350
chr11	113367801	113369050
chr11	113377001	113378250
chr11	113451451	113452850
chr11	113466951	113468250
chr11	113514451	113516400
chr11	113523501	113525050
chr11	113535301	113536850
chr11	113538151	113539650
chr11	113543501	113545000
chr11	113546901	113548650
chr11	113682951	113684200
chr11	113715901	113717450
chr11	113775601	113777000
chr11	113776151	113777400
chr11	114250951	114252200
chr11	114666351	114667800
chr11	114880151	114881400
chr11	114998451	114999750
chr11	115502201	115503600
chr11	115512351	115513900
chr11	116094351	116095800
chr11	116227601	116229100
chr11	116245601	116247050
chr11	116276051	116277300
chr11	116391651	116393050
chr11	116519251	116520750
chr11	116555151	116556450
chr11	116919201	116921000
chr11	117346201	117347550
chr11	117573901	117575150
chr11	117627351	117628900
chr11	117734651	117736300
chr11	117776651	117778550
chr11	117811401	117812800
chr11	117980851	117982100
chr11	118166551	118168250
chr11	118315651	118317100
chr11	118393551	118395150
chr11	118460551	118461850
chr11	118477151	118479000
chr11	118690851	118692250
chr11	118797651	118799200
chr11	118798851	118800150
chr11	118823001	118824350
chr11	118935401	118936700
chr11	119443601	119444850
chr11	119553351	119554600
chr11	119561601	119563100
chr11	119572851	119574300
chr11	119711301	119712850
chr11	119712301	119714050
chr11	120069901	120071500
chr11	120332401	120334050
chr11	120613001	120614500
chr11	120852201	120853450
chr11	120857851	120859200
chr11	120993201	120994550
chr11	121001551	121003000
chr11	121031251	121032700
chr11	121072101	121073550
chr11	121097601	121100150
chr11	121152551	121153800
chr11	121156201	121157650
chr11	121261601	121263150
chr11	121304351	121306400
chr11	121305501	121307100
chr11	121477301	121478600
chr11	121555851	121557300
chr11	121604951	121606400
chr11	121605451	121606700
chr11	121816051	121817600
chr11	121899651	121900900
chr11	121956301	121957550
chr11	122009951	122011200
chr11	122063551	122064800
chr11	122091251	122092700
chr11	122102701	122104150
chr11	122117701	122119150
chr11	122133401	122135100
chr11	122257851	122259250
chr11	122258351	122260000
chr11	122274101	122275550
chr11	122437251	122438700
chr11	122437951	122439350
chr11	122512801	122514700
chr11	122525651	122527100
chr11	122586751	122588200
chr11	122588751	122590100
chr11	122660801	122662050
chr11	122680501	122681950
chr11	122736001	122737400
chr11	122782651	122784050
chr11	122805651	122806900
chr11	123030251	123031650
chr11	123105051	123106300
chr11	123116551	123117800
chr11	123490651	123492100
chr11	123856201	123857650
chr11	123997151	123998650
chr11	124099651	124101650
chr11	124106801	124108300
chr11	124175201	124176700
chr11	124251001	124252250
chr11	124273301	124274850
chr11	124328251	124329800
chr11	124549651	124551100
chr11	124550751	124552400
chr11	124566751	124568200
chr11	124576101	124577700
chr11	124633101	124634400
chr11	124655001	124656400
chr11	124661901	124663500
chr11	124672101	124673550
chr11	124721151	124722650
chr11	124891801	124893050
chr11	124966751	124968200
chr11	124967501	124968800
chr11	125000251	125001600
chr11	125000851	125002200
chr11	125119401	125120650
chr11	125262101	125263600
chr11	125396551	125397900
chr11	125425051	125426350
chr11	125489701	125491100
chr11	125508601	125510050
chr11	125515101	125516700
chr11	125529401	125530800
chr11	125549951	125551300
chr11	125643301	125644600
chr11	125715651	125717950
chr11	125840401	125841950
chr11	125842501	125844250
chr11	125855251	125856700
chr11	125918851	125920400
chr11	125960601	125961900
chr11	126089101	126090500
chr11	126106401	126107800
chr11	127405401	127406900
chr11	127427301	127428700
chr11	127701501	127702750
chr11	127896501	127897800
chr11	128052601	128054000
chr11	128068351	128069850
chr11	128132451	128134150
chr11	128142451	128144150
chr11	128147151	128148800
chr11	128156451	128157900
chr11	128164801	128166150
chr11	128179701	128181300
chr11	128181501	128183100
chr11	128183501	128184950
chr11	128184801	128186850
chr11	128279501	128280800
chr11	128293801	128295350
chr11	128675851	128677350
chr11	128749151	128750400
chr11	128918301	128919750
chr11	128949001	128950500
chr11	129075101	129076600
chr11	129085101	129086650
chr11	129285801	129287200
chr11	129378051	129379500
chr11	129803151	129804450
chr11	129855401	129856750
chr11	131107901	131109250
chr11	131134901	131136650
chr11	131190101	131191750
chr11	131262851	131264400
chr11	131274551	131276000
chr11	131279251	131280700
chr11	131332601	131333850
chr11	131350201	131351950
chr11	131372401	131374300
chr11	132048701	132050200
chr11	132368701	132369950
chr11	132374301	132375700
chr11	133361051	133362550
chr11	133361701	133362950
chr11	133408351	133409800
chr11	133411901	133413450
chr11	133435201	133436700
chr11	133437651	133439000
chr11	133598801	133600050
chr11	133641051	133642600
chr11	133736301	133737550
chr11	133761551	133763050
chr11	133882401	133883700
chr11	133884551	133885800
chr11	134176051	134177400
chr11	134221951	134223200
chr11	134280801	134282050
chr11	134362001	134363500
chr11	134405251	134406700
chr12	231501	232850
chr12	367951	369800
chr12	488351	489850
chr12	517501	518900
chr12	576901	578300
chr12	586451	588100
chr12	697951	699300
chr12	730201	731500
chr12	1191451	1192900
chr12	1502551	1503900
chr12	1554551	1556050
chr12	1598451	1599850
chr12	1669651	1670900
chr12	1830301	1831750
chr12	1903801	1905150
chr12	1983501	1984800
chr12	2014101	2015400
chr12	2073501	2074750
chr12	2133151	2134400
chr12	2147701	2149150
chr12	2151551	2153250
chr12	2262801	2265000
chr12	2271651	2273050
chr12	2303501	2304800
chr12	2304601	2306050
chr12	2312101	2313650
chr12	2313901	2315600
chr12	2458751	2460100
chr12	2465601	2467050
chr12	2480851	2482350
chr12	2517101	2518400
chr12	2520651	2522250
chr12	2530001	2531950
chr12	2532601	2534100
chr12	2604051	2605600
chr12	2791701	2793050
chr12	2937501	2938900
chr12	3011751	3013200
chr12	3029101	3030500
chr12	3033451	3034900
chr12	3076301	3077800
chr12	3084101	3085450
chr12	3095901	3097500
chr12	3116401	3117950
chr12	3118001	3119350
chr12	3129951	3131200
chr12	3158101	3159350
chr12	3197201	3198900
chr12	3204451	3205800
chr12	3228001	3229500
chr12	3584001	3585350
chr12	3907851	3909150
chr12	4113951	4115250
chr12	4248301	4249800
chr12	4249751	4251000
chr12	4393951	4395550
chr12	4416101	4417600
chr12	4420451	4421950
chr12	4517251	4518850
chr12	4888951	4890250
chr12	6053801	6055050
chr12	6300851	6302350
chr12	6302501	6304250
chr12	6315001	6316750
chr12	6320851	6322100
chr12	6351351	6352850
chr12	6402451	6403850
chr12	6430401	6431950
chr12	6442051	6443600
chr12	6472101	6473600
chr12	6514001	6515600
chr12	6533701	6535200
chr12	6611201	6612600
chr12	6623101	6624550
chr12	6641751	6643500
chr12	6667551	6669100
chr12	6668151	6669950
chr12	6702701	6704200
chr12	6870351	6871600
chr12	6907601	6908850
chr12	6917001	6918250
chr12	6922651	6924200
chr12	6938001	6939450
chr12	6940851	6942300
chr12	6949451	6951200
chr12	8013851	8015500
chr12	8033251	8034800
chr12	8070151	8071450
chr12	8125351	8126600
chr12	8740501	8741900
chr12	8884201	8885450
chr12	8957451	8958700
chr12	8992851	8994250
chr12	9210751	9212100
chr12	9227251	9228700
chr12	9326901	9328150
chr12	9690951	9692500
chr12	9790651	9792050
chr12	10111301	10112750
chr12	10112551	10113900
chr12	10142151	10143600
chr12	10255901	10257150
chr12	10256351	10257600
chr12	10407901	10409250
chr12	10656601	10658200
chr12	10717301	10718800
chr12	10760151	10761450
chr12	10765301	10766950
chr12	11245801	11247250
chr12	11552951	11554400
chr12	11589051	11590950
chr12	11692251	11694150
chr12	11693751	11695000
chr12	11763201	11765000
chr12	11802551	11804300
chr12	11809651	11811650
chr12	11842601	11844000
chr12	11845501	11847000
chr12	11856401	11858300
chr12	11899151	11900750
chr12	11905101	11906350
chr12	11907851	11909100
chr12	12008001	12009500
chr12	12011301	12012900
chr12	12076501	12078150
chr12	12293151	12294650
chr12	12371351	12372850
chr12	12446901	12448400
chr12	12487001	12488400
chr12	12525251	12526750
chr12	12550301	12551700
chr12	12655001	12656350
chr12	12655951	12657200
chr12	12708751	12710300
chr12	12728001	12729350
chr12	12749551	12750800
chr12	12760251	12761500
chr12	12769051	12770300
chr12	12769651	12771000
chr12	12851951	12853300
chr12	12883651	12884900
chr12	12947601	12949050
chr12	12953851	12955200
chr12	12955851	12957300
chr12	12960351	12961800
chr12	13141651	13143200
chr12	13142551	13144050
chr12	13144451	13146000
chr12	13158551	13159850
chr12	13188001	13189450
chr12	13189551	13191050
chr12	13223051	13224500
chr12	13273851	13275200
chr12	13299551	13300900
chr12	14237301	14238800
chr12	14283751	14285100
chr12	14284201	14285450
chr12	14303551	14305100
chr12	14304151	14305700
chr12	14478651	14480050
chr12	14687651	14689250
chr12	14813701	14815950
chr12	14819001	14820250
chr12	14958101	14959450
chr12	15004551	15006550
chr12	15314251	15315700
chr12	15322551	15324450
chr12	15440401	15441650
chr12	15649851	15651300
chr12	15925901	15927300
chr12	16113451	16115100
chr12	16219901	16221150
chr12	16392501	16393950
chr12	16649351	16650900
chr12	16650201	16651550
chr12	16769901	16771300
chr12	16822201	16823700
chr12	16937151	16938500
chr12	17063851	17065250
chr12	17141251	17142550
chr12	17415201	17416750
chr12	17993401	17994750
chr12	18138951	18140300
chr12	18400501	18401850
chr12	18434901	18436300
chr12	18796151	18797500
chr12	18891301	18892600
chr12	19172951	19174200
chr12	19436701	19438150
chr12	19619351	19620950
chr12	19632301	19633550
chr12	20067901	20069350
chr12	21481051	21482850
chr12	21544851	21546650
chr12	21701001	21702250
chr12	21984801	21986350
chr12	22145601	22147050
chr12	22204001	22205350
chr12	22218851	22220150
chr12	22588001	22589350
chr12	22669301	22670900
chr12	22960451	22961750
chr12	22978651	22980200
chr12	23574401	23575650
chr12	23949951	23951450
chr12	24089551	24090950
chr12	24241101	24242650
chr12	24351001	24352650
chr12	24383351	24384800
chr12	24385301	24386700
chr12	24784201	24785450
chr12	24809851	24811300
chr12	24867751	24869150
chr12	24895701	24897100
chr12	24992001	24993500
chr12	25238951	25240400
chr12	25429101	25430800
chr12	25692251	25693700
chr12	25697451	25698950
chr12	25733751	25735150
chr12	25819501	25821050
chr12	25828851	25830250
chr12	25873851	25875100
chr12	25968101	25969750
chr12	25984301	25985650
chr12	26158301	26159750
chr12	26281201	26282600
chr12	26496151	26497700
chr12	26563801	26565350
chr12	26661251	26662750
chr12	26784651	26786050
chr12	26875551	26876800
chr12	26875851	26877200
chr12	26981701	26983100
chr12	26982551	26983850
chr12	27044401	27045900
chr12	27057351	27058900
chr12	27058201	27059500
chr12	27287501	27288800
chr12	27445801	27447050
chr12	27463601	27464900
chr12	27564801	27566200
chr12	27567901	27569250
chr12	27608551	27609850
chr12	27754101	27755400
chr12	28133351	28134600
chr12	28174351	28175800
chr12	28221601	28222850
chr12	28234551	28235850
chr12	28395051	28396650
chr12	29192751	29194200
[truncated: 16,958 more rows]

## Sheet: HUVEC EWS-FLI
chr10	159454	159869
chr10	163752	164123
chr10	811945	812315
chr10	857153	857527
chr10	1100718	1101138
chr10	2889059	2889448
chr10	2929988	2930378
chr10	2947967	2948359
chr10	2957879	2958262
chr10	3272770	3273178
chr10	3296272	3296681
chr10	3310784	3311169
chr10	3315062	3315612
chr10	3360661	3361123
chr10	3423556	3424189
chr10	3456458	3457024
chr10	3458469	3459041
chr10	3487618	3488003
chr10	3787217	3787519
chr10	3792863	3793231
chr10	3814557	3815498
chr10	3838047	3838651
chr10	3956560	3956934
chr10	3961772	3962200
chr10	4000884	4001474
chr10	4076083	4076491
chr10	4162961	4163335
chr10	4487520	4487881
chr10	4724233	4724483
chr10	4736160	4736807
chr10	4802950	4803304
chr10	5073358	5073860
chr10	5677950	5678373
chr10	5684111	5684534
chr10	5686621	5686985
chr10	5697035	5697277
chr10	6024584	6024963
chr10	6027686	6028078
chr10	6053522	6053917
chr10	6135814	6136226
chr10	6168226	6168630
chr10	6252700	6253106
chr10	6253859	6254234
chr10	6321233	6321632
chr10	6327774	6328213
chr10	6329219	6329579
chr10	6389501	6389669
chr10	6491901	6492297
chr10	6753972	6754358
chr10	6804229	6804648
chr10	6948701	6949090
chr10	7603157	7603357
chr10	8051644	8052026
chr10	8145953	8146345
chr10	8147550	8148000
chr10	8312917	8313222
chr10	8327139	8327518
chr10	8451566	8451940
chr10	8534377	8534884
chr10	8595185	8595565
chr10	9868026	9868411
chr10	10873838	10874207
chr10	10995648	10996009
chr10	11117303	11117686
chr10	11227400	11227777
chr10	11260643	11261128
chr10	11292187	11292439
chr10	11485097	11485547
chr10	11736117	11736497
chr10	11744371	11745046
chr10	11755967	11756575
chr10	11761912	11762522
chr10	11770421	11770768
chr10	11880869	11881247
chr10	11895710	11896093
chr10	12172262	12172634
chr10	12268318	12268728
chr10	12530686	12531075
chr10	12623844	12624048
chr10	12696595	12696972
chr10	12789372	12789756
chr10	12801363	12801750
chr10	12917454	12918332
chr10	12931252	12931662
chr10	13439097	13439466
chr10	13795009	13795391
chr10	13856237	13856830
chr10	13869041	13869438
chr10	13948152	13948568
chr10	13960645	13961015
chr10	13963996	13964603
chr10	13976433	13976886
chr10	14027705	14028085
chr10	14066528	14066870
chr10	14072254	14072812
chr10	14193723	14194121
chr10	14263260	14263649
chr10	14409681	14410119
chr10	14491845	14492178
chr10	14571782	14572448
chr10	14589149	14589637
chr10	14660400	14660790
chr10	14691908	14692276
chr10	14699093	14699560
chr10	14864707	14865199
chr10	15218293	15218673
chr10	15228312	15228763
chr10	15277515	15278091
chr10	15395906	15396290
chr10	15407636	15408014
chr10	15521551	15521949
chr10	15610879	15611331
chr10	15670768	15671222
chr10	15709724	15709999
chr10	15712448	15712828
chr10	15724138	15724525
chr10	15739939	15740585
chr10	15754616	15754900
chr10	15761945	15762468
chr10	15808080	15808440
chr10	15942295	15942804
chr10	16824615	16824992
chr10	16859641	16860008
chr10	16910904	16911567
chr10	16914667	16915081
chr10	16936700	16936989
chr10	16938607	16938951
chr10	17001581	17001967
chr10	17048929	17049305
chr10	17050409	17050792
chr10	17078219	17078587
chr10	17085124	17085524
chr10	17111526	17111903
chr10	17370028	17370321
chr10	17507825	17508269
chr10	17519422	17519802
chr10	17817162	17817547
chr10	18465861	18466260
chr10	18516992	18517363
chr10	18980372	18980747
chr10	20260457	20260823
chr10	20262357	20263061
chr10	20332599	20333023
chr10	20343039	20343619
chr10	20372861	20373533
chr10	21572750	21573092
chr10	21659629	21659917
chr10	21699650	21700571
chr10	21752195	21752698
chr10	22239824	22240249
chr10	22558242	22558712
chr10	22591959	22592302
chr10	22935181	22935581
chr10	22950677	22951051
chr10	23001679	23002230
chr10	23082454	23082756
chr10	23145911	23146287
chr10	23429265	23429628
chr10	23778148	23778549
chr10	23804342	23804743
chr10	24663232	24663629
chr10	24719253	24719637
chr10	24885705	24886092
chr10	24974733	24975112
chr10	25096373	25096755
chr10	25250288	25250724
chr10	25352375	25352667
chr10	25391239	25391855
chr10	26073231	26073887
chr10	26350375	26350766
chr10	27004655	27005088
chr10	27571876	27572229
chr10	27775386	27775766
chr10	28336960	28337407
chr10	28823995	28824371
chr10	29046807	29047204
chr10	29068995	29069206
chr10	29235827	29236186
chr10	29531384	29531530
chr10	29673378	29673780
chr10	29759276	29759445
chr10	29988032	29988727
chr10	30020331	30021184
chr10	30053933	30054836
chr10	30075156	30075646
chr10	30086411	30086829
chr10	30112498	30112886
chr10	30113312	30113700
chr10	30132485	30132896
chr10	30178506	30178873
chr10	30251183	30251525
chr10	30257241	30257478
chr10	30312624	30313041
chr10	30336406	30336790
chr10	30356212	30356589
chr10	30370729	30371119
chr10	30378088	30378476
chr10	30386864	30387432
chr10	30399242	30399477
chr10	30402473	30402704
chr10	30484346	30484653
chr10	30544647	30544978
chr10	30549118	30549483
chr10	30782694	30783047
chr10	30785213	30785581
chr10	31048477	31049229
chr10	31142745	31143117
chr10	31328358	31328712
chr10	31333508	31333908
chr10	31340150	31340798
chr10	31342329	31342725
chr10	31395599	31396104
chr10	31481654	31482051
chr10	31571903	31572356
chr10	31644399	31644778
chr10	32026115	32027324
chr10	32029149	32029672
chr10	32036771	32036969
chr10	32090499	32090900
chr10	32269711	32270106
chr10	32468316	32468619
chr10	32569746	32570342
chr10	32729824	32730201
chr10	33310644	33311121
chr10	33382237	33382579
chr10	33398242	33398752
chr10	33455089	33455501
chr10	33578579	33579005
chr10	33593206	33593590
chr10	33596708	33597056
chr10	33615195	33615504
chr10	33631121	33631528
chr10	33694734	33695478
chr10	33990607	33991027
chr10	34061734	34062149
chr10	34259931	34260315
chr10	34433772	34434135
chr10	34471375	34471737
chr10	34583529	34583941
chr10	34759586	34759876
chr10	35045914	35046312
chr10	35098891	35099273
chr10	35109757	35110131
chr10	35251148	35251315
chr10	35385654	35386028
chr10	35387099	35387486
chr10	35554138	35554553
chr10	35598054	35598442
chr10	35708097	35708653
chr10	35903736	35904394
chr10	35924307	35924423
chr10	35981016	35981408
chr10	36050441	36050802
chr10	36088885	36089300
chr10	36172582	36173253
chr10	36199646	36200072
chr10	36201111	36201252
chr10	36218922	36219338
chr10	36288618	36288989
chr10	36323017	36323490
chr10	36502276	36502561
chr10	36596286	36596670
chr10	36653884	36654161
chr10	36696284	36696627
chr10	36863543	36863946
chr10	36867849	36868285
chr10	36963619	36963982
chr10	36965481	36965599
chr10	37433157	37433548
chr10	42465977	42466317
chr10	42686624	42687183
chr10	43233531	43233939
chr10	43509015	43509367
chr10	43661841	43662228
chr10	43673030	43673394
chr10	43714530	43715803
chr10	43725645	43726016
chr10	43764774	43765149
chr10	43776925	43777452
chr10	43780518	43780885
chr10	43795711	43796113
chr10	43823766	43824167
chr10	43862709	43863200
chr10	44465401	44465781
chr10	44673091	44673473
chr10	44772754	44773164
chr10	44811487	44811927
chr10	44874216	44874482
chr10	44951405	44951672
chr10	45051207	45051929
chr10	45234229	45234562
chr10	45286021	45286403
chr10	45372956	45373334
chr10	46394506	46394913
chr10	47058587	47058964
chr10	47946150	47946581
chr10	49348162	49348439
chr10	49387495	49388008
chr10	49430148	49430549
chr10	49484722	49485428
chr10	49678397	49678759
chr10	49898640	49899033
chr10	50061663	50062055
chr10	50132601	50132886
chr10	50150768	50151202
chr10	50168201	50168572
chr10	50213311	50213883
chr10	50473777	50474169
chr10	50484926	50485290
chr10	50525667	50526052
chr10	50534470	50534752
chr10	50709376	50709767
chr10	51168479	51168896
chr10	52855233	52855686
chr10	53045527	53046000
chr10	53074360	53074752
chr10	53161595	53162111
chr10	53348839	53349151
chr10	53460236	53460620
chr10	53646600	53646957
chr10	54008570	54008861
chr10	55009529	55009899
chr10	55926725	55927106
chr10	56127268	56127642
chr10	56343899	56344264
chr10	56507082	56507420
chr10	59609907	59610203
chr10	59705696	59706075
chr10	59865951	59866260
chr10	59897884	59898261
chr10	60606917	60607340
chr10	60796105	60796503
chr10	60861971	60862358
chr10	60892631	60893039
chr10	61172209	61172621
chr10	61605136	61605464
chr10	61743111	61743536
chr10	61876642	61877055
chr10	61884126	61884517
chr10	61951853	61952224
chr10	62036414	62036882
chr10	62197439	62197873
chr10	62249997	62250554
chr10	62257832	62258445
chr10	62272609	62272911
chr10	62409581	62409955
chr10	62565920	62566333
chr10	62726000	62726361
chr10	62781840	62782220
chr10	62907693	62908087
chr10	62921239	62921524
chr10	63051432	63051669
chr10	63187272	63187690
chr10	63519155	63519456
chr10	63560731	63561332
chr10	63625196	63625578
chr10	63673084	63673539
chr10	63807780	63808148
chr10	63873682	63874077
chr10	64012415	64012918
chr10	64046146	64046451
chr10	64048794	64049171
chr10	64113214	64113422
chr10	64119484	64119890
chr10	64122775	64123112
chr10	64158828	64159206
chr10	64190253	64190655
chr10	64335515	64335917
chr10	64636969	64637302
chr10	64671643	64672021
chr10	64862030	64862405
chr10	65057532	65057907
chr10	65071840	65071958
chr10	65100073	65100518
chr10	65102113	65102501
chr10	65120748	65120920
chr10	65141647	65141975
chr10	65143026	65143427
chr10	65152361	65152708
chr10	65228979	65229347
chr10	66039370	66039770
chr10	66719821	66720203
chr10	66771929	66772366
chr10	67437375	67437736
chr10	69205007	69205407
chr10	69249358	69249743
chr10	69548489	69548875
chr10	69614151	69615069
chr10	70051832	70051985
chr10	70385637	70386052
chr10	70442597	70443035
chr10	70490900	70491786
chr10	70654980	70655360
chr10	70766900	70767284
chr10	70775497	70776349
chr10	71080756	71081206
chr10	71249485	71249863
chr10	71259583	71259958
chr10	71277550	71277960
chr10	71294313	71294701
chr10	71298967	71299402
chr10	71341897	71342338
chr10	71365923	71366079
chr10	71406702	71407099
chr10	71417512	71417770
chr10	71470902	71471283
chr10	71761408	71761803
chr10	71929119	71929507
chr10	71930480	71930877
chr10	71938663	71938971
chr10	72006252	72007120
chr10	72445467	72445915
chr10	72475318	72475691
chr10	72670191	72670571
chr10	72854796	72855437
chr10	72866297	72866678
chr10	72934788	72935150
chr10	72949805	72950344
chr10	73030673	73031047
chr10	73178527	73179133
chr10	73227532	73227949
chr10	73474007	73474396
chr10	73600864	73601265
chr10	73672360	73672738
chr10	73678540	73678904
chr10	73698637	73698851
chr10	73726979	73727362
chr10	73749124	73749506
chr10	73764673	73765082
chr10	74316983	74317357
chr10	74613660	74614038
chr10	74618537	74618645
chr10	75245872	75246258
chr10	75324306	75324747
chr10	75329120	75329563
chr10	75729896	75730102
chr10	75932912	75933421
chr10	76132064	76132393
chr10	76168760	76169144
chr10	76499816	76500046
chr10	76898941	76899517
chr10	76977108	76977501
chr10	77144425	77145104
chr10	77153145	77153553
chr10	77712037	77712461
chr10	77782076	77782444
chr10	78398864	78399209
chr10	78471377	78471754
chr10	78606795	78607112
chr10	78804566	78804807
chr10	78816559	78816935
chr10	78822609	78822930
chr10	79050543	79050949
chr10	79080119	79080442
chr10	79274832	79275281
chr10	79306320	79306692
chr10	79307563	79307989
chr10	79413498	79414175
chr10	79543149	79543549
chr10	79567277	79567644
chr10	79705940	79706304
chr10	79765343	79765622
chr10	79792171	79792551
chr10	80042818	80043230
chr10	80130272	80130489
chr10	80184568	80184942
chr10	80186595	80186982
chr10	80382858	80383280
chr10	80404000	80404268
chr10	80430751	80431302
chr10	80514038	80514422
chr10	80532922	80533292
chr10	80671823	80672244
chr10	80676451	80676990
chr10	80716177	80716826
chr10	80763723	80764182
chr10	80843013	80843403
chr10	80874125	80874519
chr10	81675322	81675693
chr10	81688614	81688985
chr10	81849058	81849423
chr10	81908377	81908758
chr10	81949580	81950036
chr10	82162244	82162681
chr10	82247338	82247820
chr10	82249809	82250144
chr10	82259435	82259910
chr10	82822931	82823316
chr10	83616481	83616783
chr10	84030801	84031469
chr10	84047798	84048182
chr10	84127287	84127665
chr10	84492232	84492664
chr10	85158150	85158286
chr10	86046239	86046604
chr10	86047497	86047831
chr10	86058448	86059093
chr10	86925413	86925808
chr10	87277326	87277687
chr10	87294362	87295073
chr10	88161204	88161658
chr10	88497488	88497883
chr10	88618044	88618580
chr10	88622562	88622978
chr10	88705259	88705653
chr10	88707216	88707902
chr10	89407146	89407515
chr10	89902480	89902996
chr10	90232488	90232892
chr10	90396727	90397245
chr10	90453053	90453425
chr10	90533465	90533831
chr10	90630226	90630690
chr10	90632248	90632678
chr10	90732910	90733373
chr10	90736264	90736657
chr10	90739648	90740506
chr10	90740783	90741181
chr10	90781297	90782422
chr10	90957489	90957860
chr10	91029107	91029828
chr10	91077898	91078275
chr10	91204615	91205028
chr10	91219262	91219662
chr10	91253365	91253759
chr10	91303735	91304262
chr10	92201181	92201594
chr10	92670893	92671522
chr10	92680803	92681208
chr10	92783814	92784279
chr10	93422019	93422415
chr10	93826531	93826894
chr10	94440416	94440812
chr10	94449408	94449713
chr10	94505969	94506375
chr10	94565799	94566151
chr10	94571699	94572062
chr10	94580589	94581283
chr10	95086467	95086782
chr10	95212648	95213045
chr10	95323318	95323686
chr10	95661687	95661865
chr10	95954177	95954793
chr10	95960188	95960830
chr10	96037086	96037397
chr10	97084052	97084651
chr10	97197360	97197882
chr10	97229856	97230229
chr10	97265211	97265577
chr10	97267246	97267659
chr10	97281787	97282203
chr10	97479015	97479383
chr10	97491603	97491973
chr10	97563696	97564105
chr10	97925413	97925802
chr10	98508191	98508574
chr10	98551422	98551745
chr10	98662272	98662571
chr10	99105258	99105638
chr10	99249924	99250179
chr10	99267688	99268385
chr10	99292847	99293250
chr10	99346517	99346866
chr10	99392314	99393311
chr10	99625050	99625430
chr10	99645727	99646099
chr10	99828524	99828880
chr10	100066443	100066792
chr10	100083272	100083670
chr10	100094207	100094502
chr10	100099251	100099619
chr10	100102795	100103229
chr10	100135959	100136270
chr10	100278088	100278676
chr10	101217286	101217672
chr10	101221196	101221305
chr10	101531700	101531848
chr10	101716065	101716466
chr10	101733022	101733412
chr10	102690487	102690817
chr10	102837490	102838005
chr10	102913235	102913362
chr10	103066604	103066989
chr10	103576173	103576581
chr10	103598024	103598576
chr10	103687964	103688474
chr10	103975244	103975635
chr10	104030373	104030753
chr10	104349478	104349983
chr10	104354114	104354572
chr10	104362550	104363070
chr10	104382976	104383407
chr10	104532390	104532792
chr10	104535502	104535955
chr10	104551684	104552075
chr10	104559971	104560395
chr10	104564229	104564622
chr10	104639214	104639431
chr10	105249016	105249347
chr10	105482900	105483274
chr10	105509214	105509636
chr10	105513503	105513883
chr10	105545595	105545869
chr10	105560790	105560968
chr10	105562213	105562629
chr10	105602715	105603092
chr10	105658026	105658442
chr10	105665570	105665966
chr10	105771785	105772186
chr10	105799181	105799462
chr10	105804974	105805246
chr10	106075834	106076247
chr10	111668427	111668754
chr10	111684927	111685330
chr10	111692116	111692312
chr10	111715122	111715627
chr10	111717068	111717528
chr10	111831688	111832096
chr10	112060525	112060901
chr10	112125964	112126486
chr10	112129657	112129865
chr10	112138101	112138491
chr10	112148965	112149549
chr10	112196779	112197132
chr10	112209839	112210224
chr10	112238770	112239176
chr10	112255169	112255523
chr10	112261727	112262114
chr10	112275019	112275445
chr10	112277417	112278000
chr10	112283079	112283392
chr10	112285927	112286177
chr10	113637647	113638184
chr10	113830748	113831114
chr10	114063297	114064230
chr10	114067171	114067344
chr10	114093137	114093544
chr10	114111606	114111944
chr10	114138984	114139579
chr10	114196596	114196988
chr10	114491717	114492025
chr10	114606890	114607294
chr10	114652476	114652853
chr10	114823425	114823949
chr10	114837133	114837617
chr10	114843437	114844032
chr10	114971343	114971966
chr10	114973488	114973897
chr10	115131574	115131940
chr10	115276981	115277304
chr10	115300099	115300499
chr10	115593976	115594343
chr10	115735552	115735839
chr10	115846434	115846956
chr10	115850486	115850925
chr10	115899391	115899748
chr10	116121906	116122385
chr10	116262622	116262809
chr10	116389024	116389397
chr10	116656196	116656578
chr10	116675503	116675905
chr10	116817345	116817879
chr10	117688686	117689034
chr10	117691671	117692245
chr10	118812628	118813012
chr10	118840085	118840398
chr10	118884288	118884639
chr10	118924281	118924860
chr10	119204055	119204456
chr10	119205941	119206325
chr10	119226316	119226642
chr10	119997750	119998101
chr10	120447913	120448349
chr10	120619952	120620449
chr10	120668205	120668620
chr10	120777978	120778262
chr10	120952455	120952838
chr10	120955686	120956083
chr10	121030118	121030485
chr10	121055635	121056000
chr10	121094238	121094421
chr10	121120380	121120753
chr10	121159413	121159816
chr10	121238968	121239399
chr10	121271369	121271763
chr10	121289567	121289982
chr10	121429591	121429981
chr10	121436188	121436767
chr10	121442753	121443134
chr10	121519469	121519851
chr10	121536945	121537351
chr10	121621403	121621777
chr10	121797589	121797966
chr10	122210313	122210701
chr10	122385462	122385875
chr10	122391177	122391597
chr10	122433708	122434287
chr10	123396097	123396309
chr10	123801279	123801582
chr10	123803982	123804341
chr10	124060207	124060454
chr10	124199812	124200196
chr10	124224053	124224399
chr10	124279723	124280127
chr10	124565032	124565421
chr10	125541880	125542259
chr10	125558394	125558771
chr10	125663416	125663923
chr10	125789082	125789616
chr10	125803494	125803871
chr10	126059557	126059849
chr10	126134972	126135379
chr10	126654699	126655059
chr10	126888037	126888455
chr10	127228909	127229452
chr10	127233425	127233861
chr10	127285003	127285384
chr10	127305286	127305686
chr10	127306932	127307284
chr10	127363134	127363574
chr10	127571006	127571369
chr10	127728396	127728786
chr10	127739115	127739523
chr10	127915084	127915308
chr10	128660785	128661337
chr10	128665441	128666010
chr10	128770033	128770689
chr10	128813785	128813992
chr10	128942549	128942938
chr10	128958581	128958971
chr10	129568714	129569238
chr10	129577907	129578332
chr10	129607553	129608165
chr10	129665842	129666213
chr10	129667275	129667642
chr10	129751261	129751645
chr10	129896672	129897054
chr10	129909490	129909803
chr10	130719775	130720223
chr10	130723613	130723976
chr10	130727523	130727904
chr10	130734419	130734944
chr10	130854042	130854613
chr10	130982334	130982703
chr10	130993265	130993724
chr10	131030706	131031078
chr10	131074404	131074991
chr10	131137547	131137929
chr10	131638262	131638701
chr10	131664455	131664977
chr10	133611488	133611719
chr10	133705490	133705893
chr10	134251875	134252269
chr10	134756146	134756547
chr10	134774119	134774481
chr10	134922675	134923089
chr11	522267	522638
chr11	921380	921760
chr11	922477	922869
chr11	1034279	1034655
chr11	1523259	1523650
chr11	1567173	1567437
chr11	1632442	1632833
chr11	2084124	2084596
chr11	2377940	2378373
chr11	2876508	2876881
chr11	3073472	3074194
chr11	3843540	3844094
chr11	3858593	3858972
chr11	3924873	3925235
chr11	4075890	4076225
chr11	5533092	5533461
chr11	6008148	6008535
chr11	6356064	6356296
chr11	6362992	6363443
chr11	6595203	6595601
chr11	6613433	6613645
chr11	6706319	6706710
chr11	7449870	7450015
chr11	7555649	7556031
chr11	8591040	8591429
chr11	8666888	8667302
chr11	8995480	8995708
chr11	9134841	9135220
chr11	9147725	9148234
chr11	9334032	9334395
chr11	9342220	9342631
chr11	9455117	9455506
chr11	9604944	9605158
chr11	9617282	9617694
chr11	9630353	9630811
chr11	9733647	9734280
chr11	9736650	9737287
chr11	9743702	9744102
chr11	9999686	10000066
chr11	10286185	10286598
chr11	10387477	10387874
chr11	10392748	10393004
chr11	10468642	10468984
chr11	10483790	10484181
chr11	10534827	10535009
chr11	10559639	10560098
chr11	10584233	10584608
chr11	10585619	10586060
chr11	10637847	10638280
chr11	11328096	11328467
chr11	11556932	11557308
chr11	11663191	11663606
chr11	11725840	11726087
chr11	11955395	11955817
chr11	11966340	11966728
chr11	12064132	12065029
chr11	12068094	12068804
chr11	12069750	12070154
chr11	12102829	12103329
chr11	12145239	12145666
chr11	12179287	12179727
chr11	12264151	12264525
chr11	12576688	12577101
chr11	12671828	12672209
chr11	12694017	12694393
chr11	12701540	12701832
chr11	12703822	12704104
chr11	12765929	12766274
chr11	12793056	12793578
chr11	13083465	13083842
chr11	13088921	13089699
chr11	13096310	13096549
chr11	13113876	13114282
chr11	13723289	13723682
chr11	14092448	14092856
chr11	14400352	14400825
chr11	14556615	14557026
chr11	14869097	14869460
chr11	14913325	14914000
chr11	15211671	15212075
chr11	15832349	15832768
chr11	15980089	15980445
chr11	16000346	16000686
chr11	16025118	16025570
chr11	16103804	16104185
chr11	16327636	16328002
chr11	16351949	16352161
chr11	16872277	16872672
chr11	16884215	16884596
chr11	17218932	17219416
chr11	17331838	17332064
chr11	17591430	17591661
chr11	18058559	18058971
chr11	18243164	18243638
chr11	18504861	18505231
chr11	18755922	18756295
chr11	18780052	18780422
chr11	18787325	18787601
chr11	19003895	19004263
chr11	19038760	19039131
chr11	19056059	19056473
chr11	19065784	19066204
chr11	19178010	19178413
chr11	19358468	19358877
chr11	19425318	19425683
chr11	19486246	19486613
chr11	19592675	19593079
chr11	19606128	19606521
chr11	19839330	19839715
chr11	19935942	19936251
chr11	20075570	20076048
chr11	20077706	20078088
chr11	22437214	22437624
chr11	22807986	22808381
chr11	22910723	22911080
chr11	23547577	23548205
chr11	24280273	24280680
chr11	24290459	24290878
chr11	24714439	24714806
chr11	24811789	24812065
chr11	26704118	26704495
chr11	27189887	27190294
chr11	27194250	27194683
chr11	27214041	27214250
chr11	27260463	27260822
chr11	27324466	27324837
chr11	27440693	27441082
chr11	27946592	27946948
chr11	28680196	28680576
chr11	28811756	28812162
chr11	29096696	29096838
chr11	29098114	29098504
chr11	30690800	30691417
chr11	30736145	30736523
chr11	30790949	30791321
chr11	32029272	32029643
chr11	32034560	32034960
chr11	32081183	32081710
chr11	32095951	32096062
chr11	32303250	32303784
chr11	32348271	32348653
chr11	32370084	32370712
chr11	32398893	32399338
chr11	32489933	32490403
chr11	32508244	32508441
chr11	32609538	32609884
chr11	33178894	33179264
chr11	33347045	33347459
chr11	33349558	33349978
chr11	33350643	33351013
chr11	33407986	33408189
chr11	33423901	33424227
chr11	33430923	33431280
chr11	33578498	33578869
chr11	33608971	33609370
chr11	33668454	33669139
chr11	33815616	33815822
chr11	33871747	33872131
chr11	33908433	33908832
chr11	33910951	33911269
chr11	33915370	33915861
chr11	33919638	33920085
chr11	34024230	34024442
chr11	34577765	34578171
chr11	34787721	34788092
chr11	35013999	35014519
chr11	35065853	35066304
chr11	35089774	35090161
chr11	35170620	35170824
chr11	35774524	35774972
chr11	35830261	35830687
chr11	36035893	36036159
chr11	36069304	36069748
chr11	36094317	36094718
chr11	36127782	36128161
chr11	36143953	36144357
chr11	36239642	36240006
chr11	36323109	36323526
chr11	36327438	36327821
chr11	36341506	36341946
chr11	36352060	36352271
chr11	36354009	36354339
chr11	36387223	36387634
chr11	36425649	36426058
chr11	39519959	39520554
chr11	40307339	40307728
chr11	40330130	40330475
chr11	41830311	41830679
chr11	42289664	42290048
chr11	42511199	42511584
chr11	43876741	43876998
chr11	43908967	43909375
chr11	44052565	44052941
chr11	44068736	44069079
chr11	44164943	44165222
chr11	44247803	44248191
chr11	44271121	44271497
chr11	44300965	44301475
chr11	44547289	44547689
chr11	44601493	44601885
chr11	44651950	44652173
chr11	44688112	44688503
chr11	44726741	44727128
chr11	44744338	44744821
chr11	44796270	44796707
chr11	44802458	44802917
chr11	44933096	44933694
chr11	44958755	44959201
chr11	45004184	45004664
chr11	45024029	45024676
chr11	45026431	45026887
chr11	45072872	45073233
chr11	45446455	45446825
chr11	45459624	45460086
chr11	45582109	45582517
chr11	45620056	45620444
chr11	45621421	45622223
chr11	45636526	45637099
chr11	45707211	45707398
chr11	45721267	45721782
chr11	46678572	46679456
chr11	46882945	46883431
chr11	47372861	47373243
chr11	47883377	47884276
chr11	47893543	47893937
chr11	47991416	47991813
chr11	49211966	49212283
chr11	56440592	56441046
chr11	56647615	56648047
chr11	56649067	56649488
chr11	56673270	56673637
chr11	56746279	56746660
chr11	56768907	56769362
chr11	56812865	56813248
chr11	56930562	56930967
chr11	56940526	56940883
chr11	56948804	56949160
chr11	57005441	57005833
chr11	57033701	57033850
chr11	57062265	57062651
chr11	57147194	57147637
chr11	57299586	57299972
chr11	57302565	57303019
chr11	57527057	57527649
chr11	57528686	57529068
chr11	57548611	57548989
chr11	57558623	57559002
chr11	58101575	58101954
chr11	58714035	58714402
chr11	58741870	58742516
chr11	58987251	58987692
chr11	59074545	59075227
chr11	59081440	59081800
chr11	59152353	59152755
chr11	59230972	59231303
chr11	59685160	59685537
chr11	59693390	59693775
chr11	59809949	59810129
chr11	60415127	60415493
chr11	60872023	60872439
chr11	61435708	61436091
chr11	61446485	61447034
chr11	61468273	61468373
chr11	61502674	61503088
chr11	61528525	61528919
chr11	61557523	61558048
chr11	61988828	61989257
chr11	62036893	62037148
chr11	62064803	62065255
chr11	62077305	62077692
chr11	62080662	62080982
chr11	62101087	62101933
chr11	62146030	62146419
chr11	62162477	62162868
chr11	62413943	62414344
chr11	62541726	62542123
chr11	62669384	62669804
chr11	62689713	62690121
chr11	63045907	63046284
chr11	63106256	63106591
chr11	63526168	63526571
chr11	63731864	63732300
chr11	64266276	64266684
chr11	64325744	64326145
chr11	64379030	64379281
chr11	64393353	64393670
chr11	64514178	64514571
chr11	64754113	64754241
chr11	64804224	64804571
chr11	64814928	64815270
chr11	64841116	64841516
chr11	65135506	65135883
chr11	65164080	65164514
chr11	65415720	65416173
chr11	65539441	65539847
chr11	66491722	66492354
chr11	66600899	66601233
chr11	67124419	67124792
chr11	67624680	67625055
chr11	67852342	67852709
chr11	67855555	67855973
chr11	67904404	67904811
chr11	68027296	68027659
chr11	68074468	68074837
chr11	68273091	68273500
chr11	68730443	68730825
chr11	68791345	68791860
chr11	68821102	68821771
chr11	68835978	68836414
chr11	68876681	68877060
chr11	68973730	68974103
chr11	69018329	69018607
chr11	69032896	69033326
chr11	69062530	69062914
chr11	69135627	69135847
chr11	69146097	69146271
chr11	69512577	69513039
chr11	69541053	69541419
chr11	69597530	69597915
chr11	69652006	69652375
chr11	69710093	69710303
chr11	69790993	69791485
chr11	70312019	70312387
chr11	70779517	70779681
chr11	71596019	71596156
chr11	71872354	71872798
chr11	71958675	71959060
chr11	72013559	72013858
chr11	72021082	72021461
chr11	72538560	72538892
chr11	72556193	72556608
chr11	72566088	72566472
chr11	72677368	72677757
chr11	72710423	72710841
chr11	72755552	72756013
chr11	73818137	73818296
chr11	73857368	73857484
chr11	73875616	73875837
chr11	73877643	73877998
chr11	73909605	73910024
chr11	73948252	73948631
chr11	74085794	74086209
chr11	74172228	74172469
chr11	74207120	74207703
chr11	74294013	74294379
chr11	74318118	74318545
chr11	74326773	74327216
chr11	74550186	74550599
chr11	74681650	74682039
chr11	74725921	74726263
chr11	74729343	74729722
chr11	74745320	74745740
chr11	74852039	74852416
chr11	74854873	74855238
chr11	74951820	74952211
chr11	74971095	74971503
chr11	75626628	75626913
chr11	75630086	75630486
chr11	75883246	75883390
chr11	75948911	75949300
chr11	75967150	75967551
chr11	75976847	75977680
chr11	76059616	76060050
chr11	76088804	76089578
chr11	76157245	76157479
chr11	76195540	76195935
chr11	76212309	76212702
chr11	76237575	76237874
chr11	76274055	76274459
chr11	76556253	76556661
chr11	76796284	76796677
chr11	76935785	76936419
chr11	77032728	77033235
chr11	77094174	77094645
chr11	77428677	77429080
chr11	77804879	77805291
chr11	77808723	77809923
chr11	77985145	77985560
chr11	78185724	78186086
chr11	78189899	78190343
chr11	78197522	78197902
chr11	78349848	78350441
chr11	78406983	78407527
chr11	78538979	78539421
chr11	79982601	79982930
chr11	80088087	80088523
chr11	80411386	80411662
chr11	82262607	82263009
chr11	82272511	82272892
chr11	82278432	82278785
chr11	82396612	82397036
chr11	82403361	82403803
chr11	82881780	82882226
chr11	83122906	83123137
chr11	83135787	83136193
chr11	85141614	85141944
chr11	85202163	85202542
chr11	85458428	85458821
chr11	85540231	85540712
chr11	85759978	85760346
chr11	85776710	85777054
chr11	85848487	85848965
chr11	85955731	85956041
chr11	86021389	86021864
chr11	86304566	86304988
chr11	86320675	86321038
chr11	86328220	86328592
chr11	86330271	86331218
chr11	86336205	86336577
chr11	86344715	86345108
chr11	86583909	86584296
chr11	86741721	86742104
chr11	86755079	86755484
chr11	86757607	86758032
chr11	87288951	87289554
chr11	87305574	87305991
chr11	87774886	87775268
chr11	88815609	88815994
chr11	88979750	88980109
chr11	89623980	89624174
chr11	90874790	90875200
chr11	90998432	90998759
chr11	91665705	91665932
chr11	92138812	92139282
chr11	92958443	92958843
chr11	92976025	92976375
chr11	93515087	93515454
chr11	93772907	93773309
chr11	94003065	94003463
chr11	94105488	94105876
chr11	94167590	94167974
chr11	94299439	94299830
chr11	94306561	94306936
chr11	94311260	94311653
chr11	94481031	94481425
chr11	94517140	94517538
chr11	94520271	94520670
chr11	94789750	94790120
chr11	94792794	94793173
chr11	94802240	94802626
chr11	94805927	94806308
chr11	94823204	94824042
chr11	95088627	95089042
chr11	95106835	95107190
chr11	95455181	95455594
chr11	95529677	95530063
chr11	95580544	95580926
chr11	95588227	95588620
chr11	95593079	95593448
chr11	95626950	95627333
chr11	97342028	97342413
chr11	97554276	97554875
chr11	99942498	99942829
chr11	99995407	99995778
chr11	100022302	100022613
chr11	100169524	100169787
chr11	100325452	100325868
chr11	101166109	101166489
chr11	101721773	101722324
chr11	101920513	101920933
chr11	101991320	101991814
chr11	102134079	102134422
chr11	102175943	102176171
chr11	102297621	102298088
chr11	102300789	102301023
chr11	102306641	102306904
chr11	102372199	102372605
chr11	102926058	102926852
chr11	103000946	103001329
chr11	103075500	103075890
chr11	103088724	103089095
chr11	103173950	103174329
chr11	103176240	103176681
chr11	103510660	103511053
chr11	103539815	103540226
chr11	103614886	103615261
chr11	104081747	104082125
chr11	104148638	104149418
chr11	104486309	104487008
chr11	105060919	105061304
chr11	105311750	105312143
chr11	105847184	105847569
chr11	107000806	107001270
chr11	107216658	107217036
chr11	107232662	107233557
chr11	108282213	108282590
chr11	109290730	109291166
chr11	109319870	109320197
chr11	109347242	109347369
chr11	109399830	109400202
chr11	109445415	109445735
chr11	109695490	109695834
chr11	109704075	109704439
chr11	109730644	109731006
chr11	109733181	109733569
chr11	109738834	109739122
chr11	109773988	109774329
chr11	109898470	109898817
chr11	110033676	110034042
chr11	110088748	110089243
chr11	110169491	110169893
chr11	110177232	110177673
chr11	110213671	110214058
chr11	110259571	110260004
chr11	110347033	110347513
chr11	110348589	110348914
chr11	110349525	110349950
chr11	110351654	110352025
chr11	110729745	110730039
chr11	110822417	110822815
chr11	111195036	111195412
chr11	111668094	111668469
chr11	111986784	111987332
chr11	112680839	112681501
chr11	112757569	112757936
chr11	112760457	112760859
chr11	112828199	112828558
chr11	112923037	112923430
chr11	113253583	113253992
chr11	113409007	113409415
chr11	113515135	113515452
chr11	113524138	113524311
chr11	113535898	113536293
chr11	113670798	113671391
chr11	113683563	113683867
chr11	113716474	113716890
chr11	114115143	114115556
chr11	114156194	114156609
chr11	114169885	114170261
chr11	114173036	114173209
chr11	114666716	114667319
chr11	115736432	115736805
chr11	115743104	115743549
chr11	115749546	115749912
chr11	115934457	115934837
chr11	116227578	116227953
chr11	116392091	116392511
chr11	116953243	116953596
chr11	117157873	117158317
chr11	117199926	117200307
chr11	117237554	117237992
chr11	117250103	117250641
chr11	117348559	117349031
chr11	117424674	117424911
chr11	117617008	117617474
chr11	117627828	117628531
chr11	117988328	117988855
chr11	118288768	118289134
chr11	118506634	118507023
chr11	118694610	118695146
chr11	118695589	118696049
chr11	118991425	118991904
chr11	119060248	119060640
chr11	119356668	119357051
chr11	119553818	119554212
chr11	119600761	119601150
chr11	119649972	119650245
chr11	119713124	119713574
chr11	119720273	119720648
chr11	119722880	119723269
chr11	119780391	119780764
chr11	119942065	119942471
chr11	120149350	120149663
chr11	120493675	120494059
chr11	120852393	120853006
chr11	120858278	120858685
chr11	120990588	120990990
chr11	121005934	121006321
chr11	121103035	121103473
chr11	121156778	121156935
chr11	121176212	121176633
chr11	121204969	121205395
chr11	121340390	121340803
chr11	121341207	121341579
chr11	121515014	121515518
chr11	121572878	121573307
chr11	121605234	121605859
chr11	121606254	121607005
chr11	121618671	121618932
chr11	121685470	121685938
chr11	121867426	121867806
chr11	121976814	121977142
chr11	121991268	121991619
chr11	122008163	122008536
chr11	122018345	122018772
chr11	122023496	122024155
chr11	122029808	122030222
chr11	122129736	122130319
chr11	122184440	122184828
chr11	122526392	122526910
chr11	122659929	122660307
chr11	122736566	122736760
chr11	122783074	122783465
chr11	122830088	122830528
chr11	122889254	122889650
chr11	123005237	123005644
chr11	123035278	123035703
chr11	123057575	123058026
chr11	123216990	123217485
chr11	123491133	123491638
chr11	123512492	123512838
chr11	123651249	123651647
chr11	123735320	123735577
chr11	123837649	123838139
chr11	124123624	124124011
chr11	124134846	124135081
chr11	124273851	124274258
chr11	124275579	124275945
chr11	124550160	124550534
chr11	124551351	124551792
chr11	124567305	124567697
chr11	124576641	124577074
chr11	124578354	124578753
chr11	124672599	124673072
chr11	124721704	124722106
chr11	124765919	124766457
chr11	125105145	125105582
chr11	125152147	125152681
chr11	125711664	125712090
chr11	125843112	125843754
chr11	125885355	125885720
chr11	126192214	126192615
chr11	127108686	127109066
chr11	127254461	127254679
chr11	127401721	127402098
chr11	127406061	127406192
chr11	127412616	127412943
chr11	127414690	127415193
chr11	127427935	127428347
chr11	127527808	127528175
chr11	127528743	127529101
chr11	127555498	127556259
chr11	127570234	127570603
chr11	127704029	127704410
chr11	127709691	127710122
chr11	127718062	127718364
chr11	127853561	127853720
chr11	127923760	127924139
chr11	127951025	127951444
chr11	127960398	127960619
chr11	128020981	128021396
chr11	128053146	128053530
chr11	128068519	128069522
chr11	128080647	128081042
chr11	128084483	128084857
chr11	128185325	128186291
chr11	128211250	128211544
chr11	128212788	128213177
chr11	128283968	128284429
chr11	128339573	128340136
chr11	128676544	128676738
chr11	129021142	129021517
chr11	129325907	129326271
chr11	129378565	129378829
chr11	129398339	129398781
chr11	129436087	129436483
chr11	129494142	129494527
chr11	129497115	129497752
chr11	129855915	129856339
chr11	129902705	129903113
chr11	129936485	129936861
chr11	130101513	130101894
chr11	130112492	130112911
chr11	130261845	130262239
chr11	130284796	130285150
chr11	130321026	130321443
chr11	130324355	130324703
chr11	131024921	131025313
chr11	131044230	131044595
chr11	131108443	131108651
chr11	131120515	131120883
chr11	131124114	131124545
chr11	131179742	131180195
chr11	131186505	131186824
chr11	131214378	131214748
chr11	131244185	131244618
chr11	131351097	131351316
chr11	131381804	131382159
chr11	131429893	131430278
chr11	131447068	131447464
chr11	131479210	131479658
chr11	131664722	131665358
chr11	131799591	131799932
chr11	131827442	131827866
chr11	132049240	132049616
chr11	132060414	132060794
chr11	132415289	132415501
chr11	133435387	133435769
chr11	133438166	133438564
chr11	133496294	133496691
chr11	133736831	133736947
chr11	133911835	133912216
chr11	134324068	134324569
chr11	134362650	134363002
chr11	134391428	134391712
chr11	134405741	134406200
chr11	134445165	134445536
chr12	488926	489287
chr12	518024	518404
chr12	524060	524710
chr12	532974	533381
chr12	587160	587450
chr12	589659	590046
chr12	595041	595452
chr12	1453622	1453936
chr12	1643070	1643507
chr12	1648185	1648596
chr12	1740176	1740569
chr12	1791086	1791456
chr12	1792350	1792728
chr12	2312664	2313171
chr12	2314508	2314790
chr12	2315753	2316251
chr12	2358099	2358401
chr12	2521326	2521681
chr12	2910321	2910706
chr12	3029688	3030078
chr12	3034009	3034390
chr12	3076849	3077262
chr12	3096490	3096884
chr12	3102304	3102703
chr12	3108790	3109137
chr12	3132407	3132792
chr12	3204857	3205230
chr12	3225722	3226116
chr12	3228535	3228907
chr12	3326023	3326408
chr12	3620932	3621414
chr12	3928086	3928474
chr12	4075486	4075900
chr12	4552121	4552511
chr12	4559120	4559501
chr12	4806294	4806849
chr12	5018269	5018701
chr12	5565665	5566053
chr12	6054292	6054709
chr12	6096088	6096505
chr12	6120536	6120752
chr12	6147146	6147607
chr12	6151009	6151399
chr12	6159648	6160050
chr12	6273451	6273791
chr12	6315947	6316250
chr12	6441246	6441661
chr12	6527390	6527832
chr12	6618585	6618967
chr12	6668912	6669398
chr12	6923251	6923640
chr12	7024875	7025113
chr12	7167966	7168377
chr12	7194281	7194680
chr12	7232680	7233047
chr12	7439861	7440490
chr12	7477128	7477611
chr12	7739052	7739402
chr12	8033981	8034195
chr12	8070099	8070541
chr12	8110020	8110503
chr12	8725194	8725571
chr12	8884681	8885060
chr12	9040781	9041221
chr12	9211169	9211580
chr12	9213851	9214258
chr12	9546019	9546418
chr12	9691544	9691950
chr12	9694561	9694982
chr12	9791014	9791626
chr12	9808656	9809035
chr12	10111944	10112226
chr12	10283146	10283491
chr12	10685620	10686012
chr12	10717821	10718243
chr12	10765934	10766083
chr12	10930066	10930471
chr12	11059640	11060398
chr12	11246358	11246744
chr12	11554842	11555222
chr12	11589629	11590017
chr12	11625555	11625949
chr12	11718204	11718574
chr12	11763966	11764446
chr12	11782224	11782582
chr12	11790375	11790752
chr12	11810295	11810654
chr12	11814357	11814924
chr12	11843076	11843458
chr12	11846025	11846510
chr12	11905725	11906104
chr12	11908337	11908663
chr12	11929485	11929962
chr12	12008492	12008891
chr12	12011882	12012264
chr12	12020247	12020618
chr12	12076934	12077695
chr12	12139282	12139661
chr12	12293740	12294125
chr12	12338800	12339193
chr12	12447479	12447880
chr12	12483791	12484167
chr12	12884163	12884531
chr12	12916278	12916652
chr12	12960862	12961239
chr12	12988854	12989063
chr12	13123623	13123997
chr12	13142184	13142663
chr12	13143267	13143550
chr12	13145061	13145445
chr12	13169355	13169759
chr12	13188511	13188897
chr12	13209055	13209447
chr12	13243038	13243705
chr12	13250469	13250911
chr12	14479128	14479499
chr12	14687470	14687854
chr12	15005694	15006114
chr12	15323467	15323855
chr12	15644023	15644363
chr12	15844619	15845005
chr12	19318183	19318532
chr12	19619986	19620372
chr12	19674988	19675179
chr12	19727825	19728190
chr12	19982267	19982721
chr12	20195027	20195393
chr12	21391728	21392094
chr12	21598315	21598650
chr12	21761929	21762250
chr12	22036936	22037421
chr12	22219404	22219748
chr12	22327486	22327866
chr12	22334666	22335047
chr12	22895629	22896020
chr12	24064780	24065128
chr12	24090079	24090469
chr12	24098680	24099019
chr12	24271113	24271549
chr12	24351512	24351864
chr12	24645160	24645542
chr12	24810394	24810829
chr12	24842581	24843013
chr12	24847798	24848101
chr12	24868263	24868639
chr12	24945281	24945561
chr12	25502495	25502862
chr12	25698045	25698441
chr12	25820187	25820576
chr12	25829379	25829759
chr12	25860856	25861403
chr12	25873449	25873840
chr12	25968697	25969075
chr12	26218549	26218748
chr12	26292140	26292664
chr12	26318951	26319356
chr12	26319995	26320405
chr12	26422940	26423543
chr12	26496753	26497127
chr12	26564368	26564760
chr12	26661792	26662172
chr12	26726209	26726568
chr12	26741525	26741993
chr12	26876045	26876451
chr12	26901654	26902024
chr12	27229660	27230064
chr12	27504859	27505254
chr12	27593659	27594292
chr12	27618284	27618588
chr12	27622966	27623646
chr12	27866141	27866566
chr12	27902713	27903289
chr12	28072207	28072608
chr12	28133695	28134070
chr12	28138186	28138610
chr12	28174920	28175278
chr12	28814584	28814963
chr12	28826494	28826882
chr12	29287255	29287734
chr12	29329485	29330047
chr12	29606386	29606760
chr12	29965517	29965892
chr12	30150372	30150764
chr12	30491284	30491689
chr12	30839262	30839530
chr12	30914207	30914598
chr12	30946387	30946790
chr12	30959440	30959823
chr12	30974574	30974969
chr12	31001933	31002242
chr12	31776066	31776426
chr12	31793337	31793730
chr12	31805013	31805310
chr12	31811865	31812255
chr12	31919266	31919900
chr12	31940741	31941138
chr12	32075278	32075670
chr12	32159886	32160269
chr12	32242572	32243149
chr12	32284415	32284628
chr12	32490422	32491405
chr12	32631754	32632231
chr12	32694690	32695070
chr12	32816015	32816457
chr12	37803669	37804051
chr12	37879112	37879470
chr12	38512465	38512852
chr12	38668711	38668941
chr12	39128530	39128926
chr12	39755612	39755979
chr12	40165288	40165668
chr12	40192594	40192974
chr12	40474491	40474891
chr12	40481262	40481602
chr12	40500112	40500481
chr12	40612284	40613216
chr12	40675182	40675542
chr12	40701651	40702042
chr12	40950806	40951037
chr12	40957933	40958304
chr12	40979180	40979512
chr12	41126851	41127224
chr12	41267223	41267568
chr12	41376785	41377185
chr12	41470792	41471177
chr12	41649395	41649779
chr12	41918329	41918785
chr12	41947859	41948245
chr12	41972699	41973149
chr12	41984261	41984676
chr12	41985414	41985666
chr12	42519165	42519586
chr12	42680017	42680383
chr12	42965447	42965854
chr12	43374749	43375423
chr12	43527982	43528521
chr12	43565986	43566360
chr12	43940318	43940794
chr12	43948628	43949217
chr12	44241540	44241914
chr12	44295370	44295793
chr12	44889940	44890351
chr12	44980959	44981358
chr12	45053770	45054141
chr12	45111905	45112320
chr12	45131313	45131682
chr12	45153682	45154059
chr12	45292415	45292789
chr12	45431110	45431497
chr12	45760459	45760757
chr12	45765803	45766191
chr12	45887390	45887843
chr12	45996572	45997214
chr12	46040744	46041120
chr12	46268400	46268779
chr12	46439064	46439621
chr12	46496740	46497631
chr12	46500475	46500948
chr12	46501572	46501893
chr12	46539710	46540176
chr12	46561750	46562142
chr12	46605428	46605822
chr12	46796025	46796429
chr12	46947283	46947679
chr12	47526774	47527138
chr12	47641516	47641867
chr12	47771722	47772106
chr12	47921576	47921892
chr12	48183767	48184032
chr12	48335475	48335971
chr12	48343038	48343418
chr12	48351531	48351943
chr12	48385580	48386011
chr12	48461007	48461357
chr12	48463843	48464132
chr12	48705556	48705973
chr12	48866017	48866386
chr12	48892180	48892559
chr12	48955663	48956035
chr12	49269941	49270353
chr12	49926308	49926693
chr12	49948435	49948830
chr12	49993104	49993483
chr12	50048940	50049364
chr12	50054385	50054808
chr12	50074288	50074693
chr12	50396985	50397373
chr12	50424428	50424541
chr12	50530239	50531208
chr12	50565956	50566335
chr12	50585782	50586128
chr12	50606050	50606452
chr12	50652865	50653247
chr12	50654758	50655138
chr12	50806884	50807269
chr12	50872284	50872747
chr12	51515989	51516370
chr12	51605127	51605518
chr12	51653762	51654199
chr12	51784068	51784468
chr12	52025789	52026179
chr12	52035171	52035565
chr12	52369767	52369906
chr12	53093354	53093752
chr12	53108046	53108460
chr12	53112208	53112619
chr12	53112924	53113434
chr12	53182603	53182974
chr12	53304799	53305173
chr12	54065864	54066273
chr12	54521429	54521587
chr12	54840483	54840882
chr12	55054802	55055064
chr12	55245585	55246010
chr12	55261894	55262215
chr12	55812102	55812474
chr12	56425021	56425573
chr12	56516866	56517267
chr12	56772716	56773243
chr12	56773812	56774228
chr12	56883347	56883699
chr12	56932440	56932832
chr12	56948166	56948541
chr12	57288406	57288779
chr12	57427087	57427325
chr12	58512018	58512296
chr12	58519575	58520005
chr12	58530256	58530664
chr12	59102022	59102411
chr12	60808500	60808880
chr12	61382563	61383032
chr12	61465899	61466284
chr12	62090117	62090754
chr12	62444509	62444888
chr12	62578073	62578478
chr12	62625021	62625171
chr12	62857031	62857464
chr12	62861034	62861406
chr12	62885517	62885941
chr12	63297704	63298128
chr12	63305371	63305766
chr12	63349630	63350024
chr12	63352926	63353296
chr12	63359763	63360184
chr12	63432973	63433201
chr12	63986748	63987087
chr12	63988523	63988966
chr12	64203510	64203894
chr12	64242081	64242402
chr12	64283395	64284078
chr12	64375668	64376048
chr12	64459112	64459514
chr12	64548357	64548761
chr12	64572920	64573309
chr12	64610514	64610896
chr12	64716382	64716900
chr12	64741606	64741844
chr12	64746990	64747192
chr12	64867599	64867918
chr12	64959624	64959984
chr12	66310789	66311167
chr12	66349864	66350415
chr12	67045230	67045742
chr12	67086194	67086619
chr12	67135578	67136400
chr12	67355488	67355873
chr12	67356573	67356938
chr12	67467496	67467972
chr12	67661518	67662185
chr12	67748428	67748861
chr12	67750866	67751268
chr12	68369118	68369518
chr12	68501926	68502259
chr12	69325958	69326221
chr12	69375407	69375799
chr12	69401994	69402407
chr12	69410859	69411362
chr12	69725923	69726318
chr12	69870757	69871410
chr12	69872971	69873356
chr12	70262868	70263251
chr12	70519547	70519923
chr12	70557423	70557618
chr12	72997673	72997895
chr12	73316742	73317142
chr12	74303584	74303980
chr12	74385998	74386375
chr12	74657953	74658329
chr12	74706816	74707204
chr12	75042280	75042433
chr12	75154530	75154963
chr12	75177546	75177918
chr12	75195356	75195738
chr12	75437460	75437828
chr12	75583480	75583858
chr12	75615733	75616150
chr12	76008046	76008423
chr12	76034114	76034519
chr12	76131298	76131676
chr12	77657558	77657954
chr12	77803098	77803324
chr12	78101647	78102069
chr12	78161641	78162038
chr12	78220402	78220798
chr12	78762508	78762909
chr12	78896696	78897072
chr12	79105738	79106121
chr12	79143911	79144151
chr12	79525197	79525567
chr12	79759137	79759527
chr12	79996757	79997137
chr12	80122030	80122386
chr12	80126029	80126462
chr12	80212177	80212575
chr12	80250025	80250425
chr12	80283734	80284123
chr12	81422107	81422771
chr12	81462371	81462665
chr12	81472561	81472793
chr12	81884070	81884446
chr12	81899526	81899670
chr12	83229047	83229405
chr12	83912944	83913321
chr12	84276838	84277225
chr12	84498474	84498847
chr12	84544376	84544751
chr12	84587263	84587638
chr12	85148187	85148972
chr12	85165933	85166307
chr12	85632594	85632988
chr12	87227190	87227554
chr12	87633584	87633971
chr12	87815529	87816095
chr12	87986541	87986899
chr12	88003346	88003741
chr12	88019306	88019814
chr12	88035365	88035930
chr12	88063146	88063514
chr12	88074876	88075263
chr12	88078615	88078947
chr12	88080657	88081048
chr12	88081886	88082261
chr12	88153595	88153974
chr12	88156476	88156855
chr12	88196563	88196942
chr12	88226769	88226981
chr12	88251532	88251636
chr12	88264223	88264655
chr12	88270377	88270781
chr12	88271901	88272322
chr12	88288706	88289121
chr12	88293366	88293703
chr12	88308665	88309188
chr12	88330583	88330954
chr12	88369744	88370206
chr12	88372070	88372420
chr12	88462679	88463179
chr12	88917707	88918086
chr12	89152110	89152491
chr12	89168652	89169064
chr12	89171660	89172047
chr12	89559159	89559671
chr12	89688725	89689124
chr12	89773361	89773732
chr12	90318181	90318560
chr12	90455502	90456595
chr12	90905913	90906293
chr12	90952718	90953313
chr12	91245732	91246121
chr12	91299807	91300084
chr12	91457161	91457546
chr12	91461775	91462155
chr12	91511741	91512150
chr12	91655488	91655864
chr12	91664086	91664466
chr12	91672200	91672605
chr12	91886314	91886713
chr12	91938582	91938981
chr12	91950729	91951114
chr12	91998924	91999398
chr12	92008125	92008449
chr12	92048226	92048611
chr12	92087226	92087603
chr12	92120564	92120949
chr12	92465920	92466116
chr12	92695223	92695603
chr12	92703128	92703487
chr12	92708721	92709102
chr12	92931770	92932165
chr12	93018209	93018508
chr12	93200604	93200975
chr12	93488260	93488553
chr12	93561893	93563166
chr12	93593823	93594232
chr12	93619619	93619994
chr12	93695864	93696243
chr12	93697406	93697796
chr12	93861625	93862044
chr12	94087252	94087627
chr12	94157764	94158160
chr12	94180705	94181094
chr12	94240863	94241986
chr12	94276065	94276473
chr12	94548373	94548723
chr12	94745814	94746191
chr12	94756025	94756540
chr12	94834206	94834506
chr12	94971682	94972119
chr12	94982245	94982627
chr12	95026221	95026615
chr12	95061359	95061709
chr12	95083106	95083500
chr12	95094949	95095426
chr12	95104544	95104912
chr12	95112229	95112599
chr12	95113455	95113820
chr12	95129890	95130280
chr12	95345132	95345638
chr12	95363674	95364054
chr12	95413010	95413279
chr12	95418964	95419350
chr12	95764048	95764436
chr12	96057878	96058249
chr12	96161521	96161898
chr12	96584323	96584550
chr12	96955475	96955846
chr12	97044475	97044981
chr12	97289323	97289705
chr12	97317474	97317858
chr12	97319412	97319811
chr12	97357434	97357915
chr12	97421735	97422120
chr12	97438138	97438460
chr12	97732208	97732619
chr12	97761051	97761459
chr12	99353982	99354407
chr12	99431527	99431907
chr12	99888443	99888624
chr12	100373703	100374045
chr12	100807319	100807701
chr12	100809388	100809842
chr12	101333297	101333666
chr12	101354744	101355184
chr12	101454064	101454371
chr12	101622002	101622405
chr12	101704739	101705150
chr12	102497982	102498362
[truncated: 11,878 more rows]

## Sheet: HUVEC FLI1
chr10	163734	164110
chr10	333034	333471
chr10	359609	360224
chr10	432797	433041
chr10	456658	456919
chr10	494283	494904
chr10	521365	521740
chr10	536665	537212
chr10	546985	547416
chr10	590433	591000
chr10	811941	812181
chr10	882003	882739
chr10	966493	966915
chr10	980440	980829
chr10	1024151	1024632
chr10	1079335	1079716
chr10	1092381	1092937
chr10	1093327	1093709
chr10	1100632	1101096
chr10	1146030	1146422
chr10	1272236	1272890
chr10	1280332	1280705
chr10	2930013	2930369
chr10	2947970	2948394
chr10	2957873	2958254
chr10	3017850	3018241
chr10	3086307	3087014
chr10	3100401	3101279
chr10	3103659	3104043
chr10	3119476	3119704
chr10	3123397	3123754
chr10	3127833	3128256
chr10	3225378	3225839
chr10	3229270	3229729
chr10	3229546	3230393
chr10	3253139	3253638
chr10	3265766	3266145
chr10	3272775	3273158
chr10	3290674	3291085
chr10	3295361	3295704
chr10	3296203	3296691
chr10	3304316	3304921
chr10	3310772	3311165
chr10	3371851	3372326
chr10	3389960	3390379
chr10	3430780	3431957
chr10	3431657	3431957
chr10	3432617	3432996
chr10	3456401	3457056
chr10	3458516	3458964
chr10	3484377	3484873
chr10	3487764	3487993
chr10	3497520	3498240
chr10	3499509	3500238
chr10	3571307	3571695
chr10	3779568	3780073
chr10	3787210	3787566
chr10	3813121	3814328
chr10	3815089	3815251
chr10	3838078	3838680
chr10	3838774	3839030
chr10	3842294	3842705
chr10	3853316	3853684
chr10	3867965	3868389
chr10	3918655	3919242
chr10	3920017	3920407
chr10	3927514	3927886
chr10	3951782	3952392
chr10	3956594	3956971
chr10	3961769	3962149
chr10	3963378	3963896
chr10	3974370	3974684
chr10	4000966	4001367
chr10	4005246	4005621
chr10	4076107	4076484
chr10	4099845	4100284
chr10	4101635	4102115
chr10	4106093	4106540
chr10	4118148	4118454
chr10	4140799	4141232
chr10	4144468	4145006
chr10	4160183	4160562
chr10	4162924	4163322
chr10	4274769	4275248
chr10	4320058	4320432
chr10	4369781	4370137
chr10	4482833	4483585
chr10	4573432	4573803
chr10	4666006	4666296
chr10	4724174	4724523
chr10	4736156	4736785
chr10	4740508	4740843
chr10	4803900	4804238
chr10	4812835	4813297
chr10	4879906	4880255
chr10	4881721	4882506
chr10	4899786	4900174
chr10	5126378	5126765
chr10	5323459	5323981
chr10	5325535	5326700
chr10	5329399	5329833
chr10	5349611	5350155
chr10	5436604	5436981
chr10	5494250	5494613
chr10	5533917	5534430
chr10	5577954	5578349
chr10	5579492	5580620
chr10	5580529	5580936
chr10	5586252	5586838
chr10	5619106	5619547
chr10	5677944	5678450
chr10	5686520	5687006
chr10	5697054	5697268
chr10	5725701	5726183
chr10	5894566	5895015
chr10	5895397	5895801
chr10	5928195	5928560
chr10	6024597	6024973
chr10	6026385	6026752
chr10	6027663	6028065
chr10	6028857	6029367
chr10	6032341	6032752
chr10	6053491	6053882
chr10	6058586	6059240
chr10	6098693	6099531
chr10	6135815	6136227
chr10	6168152	6168558
chr10	6173564	6174030
chr10	6211806	6212421
chr10	6222409	6222953
chr10	6233071	6234050
chr10	6239289	6239667
chr10	6245854	6246085
chr10	6252788	6253081
chr10	6253846	6254234
chr10	6321220	6321600
chr10	6327659	6328254
chr10	6329239	6329609
chr10	6357183	6357582
chr10	6419250	6419649
chr10	6463976	6464301
chr10	6481336	6481808
chr10	6483749	6484172
chr10	6491868	6492281
chr10	6752394	6752799
chr10	6753970	6754349
chr10	6804302	6804639
chr10	6811898	6812292
chr10	6820158	6820533
chr10	7077845	7078217
chr10	7158016	7158429
chr10	7346438	7346831
chr10	7419478	7419750
chr10	7539282	7539721
chr10	7855787	7856247
chr10	7869669	7870078
chr10	7900158	7900534
chr10	7995005	7995462
chr10	8030795	8031657
chr10	8051687	8051881
chr10	8080830	8081189
chr10	8121506	8121860
chr10	8124418	8124828
chr10	8134165	8135013
chr10	8135448	8136114
chr10	8139635	8139909
chr10	8140767	8141205
chr10	8141768	8142443
chr10	8145968	8146363
chr10	8147289	8147921
chr10	8155701	8156221
chr10	8312965	8313345
chr10	8354713	8355115
chr10	8405189	8405849
chr10	8451676	8452166
chr10	8460479	8460887
chr10	8475616	8475996
chr10	8482085	8482497
chr10	8534161	8534842
chr10	9149347	9150052
chr10	9257011	9257614
chr10	9659734	9660137
chr10	9868059	9868489
chr10	9868317	9868489
chr10	10867968	10868335
chr10	10873823	10874193
chr10	10878934	10879368
chr10	10878952	10879361
chr10	10913116	10913590
chr10	10995750	10996116
chr10	11117260	11117669
chr10	11227404	11227780
chr10	11260589	11261150
chr10	11286585	11286958
chr10	11292194	11292549
chr10	11399753	11399939
chr10	11418823	11419234
chr10	11427599	11428099
chr10	11446290	11446677
chr10	11475546	11475970
chr10	11485106	11485530
chr10	11736120	11736503
chr10	11755394	11756113
chr10	11761652	11762586
chr10	11766641	11767189
chr10	11767817	11768239
chr10	11839867	11840271
chr10	11880873	11881253
chr10	11896000	11896504
chr10	11953458	11953914
chr10	11966773	11967183
chr10	12004006	12004440
chr10	12124885	12125249
chr10	12133266	12133958
chr10	12150513	12150920
chr10	12172222	12172955
chr10	12189834	12190203
chr10	12268339	12268719
chr10	12277567	12278422
chr10	12690939	12691331
chr10	12696596	12697007
chr10	12781287	12781747
chr10	12789354	12789725
chr10	12794078	12794720
chr10	12801428	12801772
chr10	12864484	12864953
chr10	12883855	12884103
chr10	12912733	12913121
chr10	12917522	12918187
chr10	12927002	12927515
chr10	12931256	12931632
chr10	12987916	12988900
chr10	13098382	13098780
chr10	13181773	13182116
chr10	13182608	13182945
chr10	13242993	13243784
chr10	13383958	13384475
chr10	13430937	13431370
chr10	13464662	13465129
chr10	13473238	13473578
chr10	13618743	13619205
chr10	13668621	13669281
chr10	13756799	13757209
chr10	13766236	13766909
chr10	13768300	13768705
chr10	13777828	13778360
chr10	13783654	13784019
chr10	13789417	13789880
chr10	13794775	13795372
chr10	13856368	13856892
chr10	13857438	13857955
chr10	13869035	13869407
chr10	13871117	13871484
chr10	13883303	13883591
chr10	13903058	13903458
chr10	13913596	13914012
chr10	13916821	13917360
chr10	13929213	13929680
chr10	13939461	13939871
chr10	13948196	13948595
chr10	13960650	13961053
chr10	13964034	13964617
chr10	13976432	13976898
chr10	14027706	14028087
chr10	14032514	14032920
chr10	14042083	14042300
chr10	14066670	14067027
chr10	14069448	14069861
chr10	14072242	14072842
chr10	14091353	14091807
chr10	14097979	14098311
chr10	14114628	14115009
chr10	14118325	14118661
chr10	14409519	14410081
chr10	14541676	14541963
chr10	14589059	14589680
chr10	14627854	14628123
chr10	14660416	14660821
chr10	14669999	14670423
chr10	14687455	14688165
chr10	14691932	14692159
chr10	14699002	14699443
chr10	14750566	14750971
chr10	14831000	14831613
chr10	14863821	14864202
chr10	14864668	14865177
chr10	14883660	14884089
chr10	14959779	14960784
chr10	15036064	15036418
chr10	15041598	15042320
chr10	15117270	15117663
chr10	15122385	15122768
chr10	15218265	15218767
chr10	15228316	15228740
chr10	15277984	15278316
chr10	15338685	15339033
chr10	15362406	15362792
chr10	15367024	15367414
chr10	15395799	15396245
chr10	15399090	15399449
chr10	15407590	15407873
chr10	15444968	15445385
chr10	15467944	15468347
chr10	15473435	15473959
chr10	15521522	15521926
chr10	15543027	15544238
chr10	15667340	15667745
chr10	15670886	15671259
chr10	15685532	15685913
chr10	15687667	15688071
chr10	15709671	15710112
chr10	15712419	15712800
chr10	15724130	15724525
chr10	15754473	15754834
chr10	15761836	15762253
chr10	15782156	15782589
chr10	15942245	15942807
chr10	16091795	16092238
chr10	16552810	16553179
chr10	16592060	16592444
chr10	16647590	16647973
chr10	16824611	16824972
chr10	16859788	16860011
chr10	16899599	16900128
chr10	16910702	16911143
chr10	16914621	16915106
chr10	16936718	16937098
chr10	16938662	16939051
chr10	16973285	16973667
chr10	16992734	16993257
chr10	17001660	17001902
chr10	17034152	17034568
chr10	17035579	17036148
chr10	17036648	17037030
chr10	17048886	17049295
chr10	17050524	17050806
chr10	17074800	17075216
chr10	17078673	17079058
chr10	17088896	17089096
chr10	17089398	17089911
chr10	17105886	17106274
chr10	17107617	17108331
chr10	17111523	17111891
chr10	17144455	17145661
chr10	17182646	17182895
chr10	17282833	17283427
chr10	17283375	17284115
chr10	17310331	17310584
chr10	17312089	17312437
chr10	17312086	17312496
chr10	17370021	17370413
chr10	17507844	17508263
chr10	17513807	17514221
chr10	17527503	17528070
chr10	17557585	17558159
chr10	17601437	17601931
chr10	17660488	17661017
chr10	17817092	17817505
chr10	18334625	18335013
chr10	18939396	18939902
chr10	18980376	18980797
chr10	18987912	18988450
chr10	20251250	20251642
chr10	20260495	20260891
chr10	20332676	20333044
chr10	21278864	21279259
chr10	21298845	21299373
chr10	21331348	21331678
chr10	21398645	21399320
chr10	21429851	21430332
chr10	21499047	21499676
chr10	21659533	21659914
chr10	21693398	21693806
chr10	21698818	21699119
chr10	21752331	21752906
chr10	21773215	21773650
chr10	21823849	21824145
chr10	21824846	21825200
chr10	21824844	21825288
chr10	21854457	21854823
chr10	21855818	21856233
chr10	21862401	21863082
chr10	22036935	22037314
chr10	22056648	22057036
chr10	22127002	22127274
chr10	22239824	22240309
chr10	22290644	22291192
chr10	22331710	22332102
chr10	22343783	22344268
chr10	22371439	22371853
chr10	22384042	22384480
chr10	22462474	22462977
chr10	22558097	22558549
chr10	22580962	22581460
chr10	22645258	22645827
chr10	22654537	22655115
chr10	22664235	22664690
chr10	22669245	22669651
chr10	22703436	22704122
chr10	22765747	22766287
chr10	22811079	22811521
chr10	22897939	22898501
chr10	22935140	22935577
chr10	22950729	22951099
chr10	22976827	22977196
chr10	22978301	22978791
chr10	22982097	22982461
chr10	23001779	23002296
chr10	23004571	23004925
chr10	23041465	23042304
chr10	23082432	23082744
chr10	23145188	23145608
chr10	23145899	23146284
chr10	23153819	23154288
chr10	23256249	23256995
chr10	23423910	23424423
chr10	23425002	23425377
chr10	23429248	23429662
chr10	23778118	23778469
chr10	23869342	23869791
chr10	24363528	24363979
chr10	24444314	24444690
chr10	24447044	24447628
chr10	24536591	24536968
chr10	24538788	24539497
chr10	24712562	24713059
chr10	24761705	24762066
chr10	24786549	24786959
chr10	24792702	24793542
chr10	24885707	24886079
chr10	24908803	24909151
chr10	24974714	24974969
chr10	25051019	25051750
chr10	25053146	25053650
chr10	25122944	25123305
chr10	25140947	25141347
chr10	25226325	25226700
chr10	25230711	25231067
chr10	25250342	25250725
chr10	25318032	25318459
chr10	25352157	25352712
chr10	25352500	25352660
chr10	25386875	25387254
chr10	25388849	25389377
chr10	25391173	25391907
chr10	25397160	25397547
chr10	25876248	25876774
chr10	25885355	25885863
chr10	25886045	25886413
chr10	27026314	27026672
chr10	27189581	27189994
chr10	27216407	27216842
chr10	27352066	27352783
chr10	27369855	27370512
chr10	27483158	27483558
chr10	27570924	27571406
chr10	27571882	27572104
chr10	27574709	27575161
chr10	27648766	27649215
chr10	27713019	27713464
chr10	27775436	27775832
chr10	27832983	27833519
chr10	28016202	28016728
chr10	28120080	28120631
chr10	28155461	28155870
chr10	28337035	28337412
chr10	28459129	28459596
chr10	28468062	28468359
chr10	28577035	28577677
chr10	28823935	28824455
chr10	28861774	28862017
chr10	28955532	28956288
chr10	29235875	29236270
chr10	29243729	29244048
chr10	29301594	29302246
chr10	29313319	29313704
chr10	29646010	29646353
chr10	29673081	29673482
chr10	29675178	29676113
chr10	29699901	29700299
chr10	29738154	29738964
chr10	29778057	29778231
chr10	29975481	29975988
chr10	29988173	29988567
chr10	29990250	29990723
chr10	29998098	29998521
chr10	30020834	30021122
chr10	30054040	30054973
chr10	30057372	30057803
chr10	30075134	30075655
chr10	30086399	30086812
chr10	30101275	30101778
chr10	30112504	30112894
chr10	30113279	30113715
chr10	30124771	30125480
chr10	30128029	30128387
chr10	30132519	30132912
chr10	30155547	30155997
chr10	30157327	30157745
chr10	30178499	30178714
chr10	30180199	30180591
chr10	30187222	30187788
chr10	30224397	30224760
chr10	30251081	30251571
chr10	30254980	30255169
chr10	30280311	30280661
chr10	30297300	30297728
chr10	30336401	30336789
chr10	30356241	30356641
chr10	30356965	30357409
chr10	30369003	30369321
chr10	30370727	30371099
chr10	30372347	30372731
chr10	30378080	30378471
chr10	30386790	30387445
chr10	30392081	30392461
chr10	30399140	30399533
chr10	30432914	30433291
chr10	30453645	30454231
chr10	30463474	30463963
chr10	30484349	30484723
chr10	30515356	30515721
chr10	30517065	30517435
chr10	30528264	30528594
chr10	30544578	30544970
chr10	30548791	30549350
chr10	30567722	30568155
chr10	30678166	30678814
chr10	30782343	30782962
chr10	30785185	30785579
chr10	30912685	30913168
chr10	30970745	30971142
chr10	30973664	30973863
chr10	31048688	31049257
chr10	31053097	31053393
chr10	31055706	31056133
chr10	31080760	31081186
chr10	31117215	31117597
chr10	31132956	31133416
chr10	31141335	31141570
chr10	31141428	31141878
chr10	31142736	31143119
chr10	31146879	31147313
chr10	31187218	31187928
chr10	31212048	31212427
chr10	31269199	31269639
chr10	31293312	31293578
chr10	31328284	31328669
chr10	31333278	31333914
chr10	31339983	31340674
chr10	31342326	31342708
chr10	31365037	31365632
chr10	31380890	31381340
chr10	31388297	31388693
chr10	31395579	31396053
chr10	31398933	31399435
chr10	31407367	31407763
chr10	31430007	31430470
chr10	31481633	31482064
chr10	31572046	31572353
chr10	31607529	31607917
chr10	31644413	31644793
chr10	31647118	31647566
chr10	31855608	31856199
chr10	31949207	31949617
chr10	31978827	31979196
chr10	32026128	32027162
chr10	32029185	32029666
chr10	32029455	32029675
chr10	32034753	32035130
chr10	32036618	32037020
chr10	32074540	32075035
chr10	32080419	32080789
chr10	32193697	32194178
chr10	32225967	32226677
chr10	32258694	32259064
chr10	32269714	32270114
chr10	32285127	32285523
chr10	32468243	32468634
chr10	32729744	32730154
chr10	32775168	32775441
chr10	32775107	32775669
chr10	33267334	33267850
chr10	33268733	33269107
chr10	33287184	33287590
chr10	33289023	33289388
chr10	33290859	33291278
chr10	33309335	33310037
chr10	33310644	33310959
chr10	33312185	33313044
chr10	33324140	33325075
chr10	33334002	33335150
chr10	33382289	33382668
chr10	33395552	33395903
chr10	33454915	33455499
chr10	33493059	33493792
chr10	33501897	33502268
chr10	33522300	33522700
chr10	33524473	33525015
chr10	33525812	33526241
chr10	33543230	33543631
chr10	33562050	33562482
chr10	33578542	33578935
chr10	33582007	33582494
chr10	33592412	33592795
chr10	33593205	33593590
chr10	33615261	33615491
chr10	33631094	33631500
chr10	33659791	33660185
chr10	33663197	33663452
chr10	33663693	33664155
chr10	33694970	33695339
chr10	33742053	33742478
chr10	33748309	33748702
chr10	33986520	33986881
chr10	33990715	33991010
chr10	34003983	34004683
chr10	34005401	34005952
chr10	34101943	34102347
chr10	34279142	34279575
chr10	34431100	34431531
chr10	34433781	34434162
chr10	34442414	34442863
chr10	34471409	34471796
chr10	34583477	34583794
chr10	34588198	34588594
chr10	34609449	34609865
chr10	34642530	34642920
chr10	34666985	34667353
chr10	34759595	34759965
chr10	34967307	34967724
chr10	35087268	35087646
chr10	35098869	35099236
chr10	35109761	35110197
chr10	35153000	35153491
chr10	35158996	35159846
chr10	35219897	35220267
chr10	35323545	35323959
chr10	35350348	35350682
chr10	35370201	35370710
chr10	35385658	35386044
chr10	35387076	35387428
chr10	35419312	35419752
chr10	35501467	35501843
chr10	35520354	35520942
chr10	35524636	35525197
chr10	35554170	35554560
chr10	35598042	35598480
chr10	35701427	35701752
chr10	35708101	35708529
chr10	35715689	35716078
chr10	35750444	35750837
chr10	35776538	35777516
chr10	35815459	35816024
chr10	35824423	35824903
chr10	35893324	35894102
chr10	35904059	35904430
chr10	35972257	35973323
chr10	36088947	36089333
chr10	36093806	36094623
chr10	36107304	36107692
chr10	36124245	36124567
chr10	36199707	36200115
chr10	36201011	36201399
chr10	36218920	36219331
chr10	36235252	36235444
chr10	36247668	36248086
chr10	36254451	36254828
chr10	36288039	36289065
chr10	36323020	36323472
chr10	36388544	36388976
chr10	36422938	36423323
chr10	36470735	36471149
chr10	36501605	36501891
chr10	36502303	36502688
chr10	36653751	36654120
chr10	36696273	36696619
chr10	36738557	36739040
chr10	36863580	36863974
chr10	36867848	36868213
chr10	36909263	36909668
chr10	36963650	36964227
chr10	36965387	36965771
chr10	37433157	37433550
chr10	38339072	38339950
chr10	42453798	42454086
chr10	42453798	42454086
chr10	42465878	42466243
chr10	42559168	42559540
chr10	42569026	42569421
chr10	42597745	42598432
chr10	42633804	42634203
chr10	42686634	42687155
chr10	42691194	42691560
chr10	42907189	42907543
chr10	43102793	43103154
chr10	43212586	43212977
chr10	43224344	43224747
chr10	43233534	43233920
chr10	43267190	43267593
chr10	43270690	43271032
chr10	43373320	43373695
chr10	43383190	43383635
chr10	43389784	43390276
chr10	43411158	43412206
chr10	43421650	43422085
chr10	43464357	43464736
chr10	43505438	43505785
chr10	43508997	43509348
chr10	43513578	43513996
chr10	43597500	43597874
chr10	43661817	43662248
chr10	43662102	43662256
chr10	43673052	43673437
chr10	43679283	43679736
chr10	43683131	43683604
chr10	43715315	43715793
chr10	43725672	43726025
chr10	43746817	43747165
chr10	43764761	43765136
chr10	43780555	43780719
chr10	43780508	43780868
chr10	43786260	43786677
chr10	43795750	43796169
chr10	43823737	43824127
chr10	43826458	43826867
chr10	43862745	43862939
chr10	43862742	43863193
chr10	44665901	44666307
chr10	44672984	44673601
chr10	44751096	44751983
chr10	44772667	44773094
chr10	44783146	44784097
chr10	44796573	44796881
chr10	44811578	44812012
chr10	44816057	44816588
chr10	44816615	44817341
chr10	44874086	44874414
chr10	44911594	44912024
chr10	44951319	44951685
chr10	45024537	45024931
chr10	45051541	45052027
chr10	45054426	45054792
chr10	45234087	45234493
chr10	45235791	45236324
chr10	45240238	45240909
chr10	45347815	45348313
chr10	45372959	45373343
chr10	46394505	46394938
chr10	46469866	46470220
chr10	46478340	46478749
chr10	46549128	46549809
chr10	46549826	46550358
chr10	47058596	47058955
chr10	47097253	47097656
chr10	47133419	47134146
chr10	47945349	47945843
chr10	47946133	47946625
chr10	47956190	47956591
chr10	48028946	48029323
chr10	48081416	48081833
chr10	48094045	48094438
chr10	48207135	48207525
chr10	48212287	48212803
chr10	49131963	49132388
chr10	49348163	49348804
chr10	49375236	49376015
chr10	49387642	49388047
chr10	49428122	49428539
chr10	49430179	49430574
chr10	49467098	49467472
chr10	49484535	49485438
chr10	49501683	49501892
chr10	49502942	49503386
chr10	49505102	49505462
chr10	49533150	49533305
chr10	49534387	49534793
chr10	49570210	49570615
chr10	49678273	49678731
chr10	49779644	49780118
chr10	49823463	49823827
chr10	49824855	49825286
chr10	49828330	49828836
chr10	49846315	49846765
chr10	50055430	50055967
chr10	50061698	50061923
chr10	50066302	50066721
chr10	50072271	50072617
chr10	50237888	50238268
chr10	50416774	50417091
chr10	50417502	50418053
chr10	50472626	50473132
chr10	50473762	50474146
chr10	50484935	50485331
chr10	50695898	50696268
chr10	50709385	50709867
chr10	50719915	50720308
chr10	51168486	51168843
chr10	51229327	51229521
chr10	51231716	51232328
chr10	51235150	51236017
chr10	51245608	51246003
chr10	51246795	51247159
chr10	51756581	51756989
chr10	51847993	51848388
chr10	51968881	51969243
chr10	52016372	52016665
chr10	52054619	52055212
chr10	52083015	52083394
chr10	52169379	52169990
chr10	52359461	52359836
chr10	52827423	52827777
chr10	53045620	53046159
chr10	53074370	53074760
chr10	53129081	53129972
chr10	53348753	53349135
chr10	53357226	53357616
chr10	53460214	53460607
chr10	53646648	53647094
chr10	53659001	53659576
chr10	53747902	53748318
chr10	53764967	53765125
chr10	53817593	53817976
chr10	53909351	53909753
chr10	54008577	54009225
chr10	54133697	54134097
chr10	54189031	54189491
chr10	54833519	54834160
chr10	54974636	54974996
chr10	55009491	55009924
chr10	55265959	55266377
chr10	55408026	55408501
chr10	56127212	56127599
chr10	56226662	56227058
chr10	56343863	56344260
chr10	56628508	56628928
chr10	56803824	56804215
chr10	56840355	56840792
chr10	57060788	57061373
chr10	59499370	59499793
chr10	59670870	59671190
chr10	59699145	59699607
chr10	59705693	59706067
chr10	59712324	59712702
chr10	59815027	59815448
chr10	59905374	59905989
chr10	60247195	60247617
chr10	60412294	60412675
chr10	60551603	60551991
chr10	60796101	60796481
chr10	60797049	60797789
chr10	60966356	60966761
chr10	61125647	61126055
chr10	61605128	61605599
chr10	61743106	61743495
chr10	61814441	61814918
chr10	61818554	61818899
chr10	61876740	61877027
chr10	61884081	61884518
chr10	61885855	61886286
chr10	61951857	61952232
chr10	62036333	62036871
chr10	62197524	62197896
chr10	62207600	62208479
chr10	62250013	62250391
chr10	62258138	62258437
chr10	62275872	62276425
chr10	62372528	62373024
chr10	62409573	62409955
chr10	62419108	62419780
chr10	62482203	62482557
chr10	62565932	62566339
chr10	62569182	62569697
chr10	62840792	62841155
chr10	62890591	62890976
chr10	62902014	62902428
chr10	62917419	62917806
chr10	62928327	62928819
chr10	63019641	63020025
chr10	63051306	63051696
chr10	63187271	63187661
chr10	63259958	63260318
chr10	63264878	63265183
chr10	63330869	63331239
chr10	63478662	63479232
chr10	63512449	63512919
chr10	63538130	63538699
chr10	63557628	63558060
chr10	63560672	63561068
chr10	63625167	63625578
chr10	63736408	63736910
chr10	63807756	63808178
chr10	63873713	63874111
chr10	64012351	64012944
chr10	64023839	64024186
chr10	64048815	64049261
chr10	64061794	64062270
chr10	64067584	64068463
chr10	64076955	64077518
chr10	64113177	64113552
chr10	64119640	64119824
chr10	64158649	64159050
chr10	64184605	64185299
chr10	64190245	64190666
chr10	64233921	64234739
chr10	64246276	64246783
chr10	64290628	64291106
chr10	64315640	64316134
chr10	64636688	64637406
chr10	64671647	64671999
chr10	64698471	64699197
chr10	64861973	64862412
chr10	64914483	64914902
chr10	64950157	64951053
chr10	65024646	65025199
chr10	65057570	65057933
chr10	65058479	65058843
chr10	65060327	65060650
chr10	65071489	65072029
chr10	65100038	65100484
chr10	65102094	65102486
chr10	65120704	65121055
chr10	65141780	65141891
chr10	65143032	65143567
chr10	65152315	65152719
chr10	65228982	65229340
chr10	66192858	66193128
chr10	66719797	66720212
chr10	66748951	66749338
chr10	66771280	66771728
chr10	66771883	66772458
chr10	67532654	67533117
chr10	69194174	69194530
chr10	69205031	69205364
chr10	69241802	69242164
chr10	69249408	69249855
chr10	69279060	69279472
chr10	69281790	69282250
chr10	69281790	69282343
chr10	69504821	69505099
chr10	69572563	69572960
chr10	69595860	69596174
chr10	69614279	69614860
chr10	69632740	69633114
chr10	69761194	69761748
chr10	69762291	69762792
chr10	70024130	70024692
chr10	70029702	70030769
chr10	70258003	70258985
chr10	70330890	70331296
chr10	70385628	70386112
chr10	70442581	70443005
chr10	70478559	70479002
chr10	70487037	70487434
chr10	70491395	70491777
chr10	70515760	70516304
chr10	70519732	70520094
chr10	70553431	70553836
chr10	70645228	70645584
chr10	70655020	70655367
chr10	70667308	70667804
chr10	70669620	70670014
chr10	70707736	70708116
chr10	70708320	70708634
chr10	70746090	70746537
chr10	70749138	70749558
chr10	70751653	70752095
chr10	70757136	70758006
chr10	70766969	70767352
chr10	70775956	70776172
chr10	70778637	70779174
chr10	70792163	70792723
chr10	70806879	70807446
chr10	70807763	70808140
chr10	70876188	70876856
chr10	70879357	70879747
chr10	70891041	70891320
chr10	70894077	70894800
chr10	70904456	70904857
chr10	70908610	70909508
chr10	70909880	70910248
chr10	70910677	70911385
chr10	70927790	70928182
chr10	71080772	71081198
chr10	71114010	71115085
chr10	71122093	71122546
chr10	71151701	71152098
chr10	71157910	71158431
chr10	71204290	71204677
chr10	71246207	71246685
chr10	71249517	71249902
chr10	71259554	71259955
chr10	71275572	71276032
chr10	71277540	71277968
chr10	71294352	71294765
chr10	71296115	71297034
chr10	71298931	71299407
chr10	71300419	71300745
chr10	71341868	71342325
chr10	71365724	71366076
chr10	71406697	71407110
chr10	71506550	71506977
chr10	71545583	71545998
chr10	71562487	71562907
chr10	71603921	71604372
chr10	71661753	71662463
chr10	71726269	71726711
chr10	71761267	71761805
chr10	71794229	71794621
chr10	71893347	71893727
chr10	71904132	71904491
chr10	71907499	71907860
chr10	71909894	71910399
chr10	71929109	71929503
chr10	71930467	71930981
chr10	71938582	71939129
chr10	71956450	71956895
chr10	71964999	71965173
chr10	72086123	72086620
chr10	72128052	72128495
chr10	72152642	72153025
chr10	72314669	72315494
chr10	72316022	72316425
chr10	72445502	72445876
chr10	72475246	72475780
chr10	72562440	72562730
chr10	72648002	72648489
chr10	72670154	72670563
chr10	72674156	72674957
chr10	72676113	72676588
chr10	72683847	72684680
chr10	72685557	72685755
chr10	72701374	72701778
chr10	72702269	72702693
chr10	72704846	72705394
chr10	72777559	72777996
chr10	72784526	72784953
chr10	72796918	72797306
chr10	72866002	72866754
chr10	72869882	72870196
chr10	72934764	72935124
chr10	72949783	72950211
chr10	73030695	73031088
chr10	73053066	73053475
chr10	73067803	73068131
chr10	73096062	73096475
chr10	73108905	73109699
chr10	73143248	73143779
chr10	73178468	73178968
chr10	73197400	73197789
chr10	73212745	73213251
chr10	73227549	73227998
chr10	73318171	73318984
chr10	73368390	73368776
chr10	73386228	73386807
chr10	73394476	73395355
chr10	73408544	73408957
chr10	73450875	73451540
chr10	73473992	73474373
chr10	73600879	73601299
chr10	73616382	73616787
chr10	73645207	73645785
chr10	73672357	73672799
chr10	73678500	73679037
chr10	73698641	73698781
chr10	73726975	73727355
chr10	73738148	73738544
chr10	73749059	73749450
chr10	73750374	73750784
chr10	73755080	73755555
chr10	73784685	73785107
chr10	74222103	74222472
chr10	74316952	74317327
chr10	74365175	74365544
chr10	74457445	74457801
chr10	74525584	74526308
chr10	74540047	74540455
chr10	74597570	74598038
chr10	74613436	74614081
chr10	74618460	74618729
chr10	74682113	74682489
chr10	74842801	74843912
chr10	74926716	74927193
chr10	75031270	75031859
chr10	75160003	75160343
chr10	75173569	75173944
chr10	75215053	75215525
chr10	75245869	75246267
chr10	75249552	75250254
chr10	75266857	75267278
chr10	75270254	75270626
chr10	75295423	75295777
chr10	75309403	75309773
chr10	75316913	75317302
chr10	75324354	75324767
chr10	75329128	75329564
chr10	75335168	75335781
chr10	75337460	75337814
chr10	75338693	75339095
chr10	75362100	75362485
chr10	75367435	75367869
chr10	75395748	75396151
chr10	75428612	75429339
chr10	75487837	75488285
chr10	75619949	75620332
chr10	75933067	75933382
chr10	76015802	76016209
chr10	76132126	76132498
chr10	76168720	76169200
chr10	76357304	76357702
chr10	76452153	76452433
chr10	76454658	76455053
chr10	76463502	76463928
chr10	76499761	76499976
chr10	76617664	76617994
chr10	76702594	76702952
chr10	76723728	76724215
chr10	76830507	76831106
chr10	76831785	76832850
chr10	76859857	76860301
chr10	76899020	76899396
chr10	77021670	77022540
chr10	77022642	77023031
chr10	77084103	77084507
chr10	77153135	77153541
chr10	77163914	77164302
chr10	77203030	77203573
chr10	77212144	77212547
chr10	77275135	77275708
chr10	77351551	77352070
chr10	77354237	77354457
chr10	77463434	77464027
chr10	77532977	77533453
chr10	77681260	77681680
chr10	77782090	77782458
chr10	77973454	77973858
chr10	78471362	78471757
chr10	78593808	78594166
chr10	78608931	78609526
chr10	78617303	78617769
chr10	78634449	78634839
chr10	78801693	78802207
chr10	78804459	78804892
chr10	78806820	78807456
chr10	78809916	78810328
chr10	78816532	78816909
chr10	78822514	78822920
chr10	78835432	78835906
chr10	78961492	78961907
chr10	78966781	78967347
chr10	78979035	78979460
chr10	79008543	79009215
chr10	79050614	79050883
chr10	79168316	79168842
chr10	79266108	79266649
chr10	79274876	79275255
chr10	79307510	79307878
chr10	79366863	79367371
chr10	79373177	79373697
chr10	79413663	79413798
chr10	79455179	79456253
chr10	79459134	79459399
chr10	79482982	79483376
chr10	79567227	79567495
chr10	79599692	79600051
chr10	79600252	79600683
chr10	79605483	79605861
chr10	79663661	79664047
chr10	79679962	79680354
chr10	79685752	79686214
chr10	79729572	79729966
chr10	79742167	79742511
chr10	79765331	79765726
chr10	79792146	79792555
chr10	79846228	79846590
chr10	79867168	79867556
chr10	79868137	79868445
chr10	79950757	79951148
chr10	80005969	80006413
chr10	80022515	80022836
chr10	80085970	80086377
chr10	80130277	80130520
chr10	80168020	80168410
chr10	80181932	80182418
chr10	80184599	80184994
chr10	80186585	80186967
chr10	80292017	80292375
chr10	80306202	80307233
chr10	80346616	80347079
chr10	80361589	80361967
chr10	80367785	80368203
chr10	80399120	80399684
chr10	80403852	80403968
chr10	80403848	80404167
chr10	80405645	80406065
chr10	80430748	80431355
chr10	80477945	80478363
chr10	80502055	80502899
chr10	80514027	80514494
chr10	80532904	80533342
chr10	80557247	80557617
chr10	80559069	80560033
chr10	80574446	80575105
chr10	80576291	80576745
chr10	80578140	80578536
chr10	80584998	80585233
chr10	80584959	80585576
chr10	80588931	80589446
chr10	80606787	80607237
chr10	80608242	80608674
chr10	80651578	80651972
chr10	80671834	80672330
chr10	80676407	80677018
chr10	80696303	80696719
chr10	80723724	80724441
chr10	80747543	80747901
chr10	80832869	80833803
chr10	80843077	80843415
chr10	80850598	80851298
chr10	80874104	80874480
chr10	81654242	81655213
chr10	81675326	81675748
chr10	81688604	81688983
chr10	81796596	81796983
chr10	81828678	81828860
chr10	81828978	81829346
chr10	81895664	81896058
chr10	81908344	81908733
chr10	81913396	81913980
chr10	81915656	81915819
chr10	81915956	81916162
chr10	81949557	81949986
chr10	81955223	81955674
chr10	82073810	82074209
chr10	82156106	82156477
chr10	82161001	82161404
chr10	82162202	82162641
chr10	82163784	82164246
chr10	82214346	82214706
chr10	82217717	82218122
chr10	82221923	82222295
chr10	82235981	82236487
chr10	82247264	82247823
chr10	82248565	82248958
chr10	82249751	82249967
chr10	82255181	82255884
chr10	82257216	82257601
chr10	82259452	82259569
chr10	82259439	82259840
chr10	82290963	82291345
chr10	82292390	82292802
chr10	83556483	83556954
chr10	83613466	83613913
chr10	83616370	83616799
chr10	83626123	83626530
chr10	83627329	83627673
chr10	83777449	83777751
chr10	83886019	83886436
chr10	84030804	84031564
chr10	84047779	84048207
chr10	84127218	84127618
chr10	84261088	84261586
chr10	84492258	84492671
chr10	84897755	84898371
chr10	84985016	84985440
chr10	85295825	85296172
chr10	85302415	85302840
chr10	85353555	85353781
chr10	85396587	85397391
chr10	85469332	85469746
chr10	85474702	85475037
chr10	85733360	85733797
chr10	85779476	85779953
chr10	85889047	85889542
chr10	86017272	86017664
chr10	86046239	86046683
chr10	86047412	86047770
chr10	86058425	86058951
chr10	86174471	86174853
chr10	86272858	86273229
chr10	86274681	86275082
chr10	86925406	86925799
chr10	87277693	87278061
chr10	87294599	87295034
chr10	87295672	87296054
chr10	87343977	87344343
chr10	87373237	87373481
chr10	87391929	87392398
chr10	87398106	87398461
chr10	88161227	88161677
chr10	88270426	88271033
chr10	88407155	88407681
chr10	88497494	88497906
chr10	88618043	88618613
chr10	88622553	88622975
chr10	88689186	88689632
chr10	88704121	88704507
chr10	88705267	88705642
chr10	88707245	88708040
chr10	88708829	88709120
chr10	88717167	88717591
chr10	88719021	88719397
chr10	88720997	88721462
chr10	88953549	88953911
chr10	89254284	89254812
chr10	89385469	89385854
chr10	89407110	89407550
chr10	89412183	89412422
chr10	89463037	89463465
chr10	89466064	89466435
chr10	89509916	89510383
chr10	89567815	89568130
chr10	89600482	89600914
chr10	89604503	89605032
chr10	89611808	89612334
chr10	89612646	89613179
chr10	89672819	89673267
chr10	89812507	89812982
chr10	89817447	89817840
chr10	89902539	89902914
chr10	89912635	89913390
chr10	89994060	89994398
chr10	90029081	90029447
chr10	90332565	90333141
chr10	90396661	90397139
chr10	90410830	90411208
chr10	90453026	90453431
chr10	90630217	90630653
chr10	90736331	90736601
chr10	90739628	90740809
chr10	90740799	90741187
chr10	90759610	90759999
chr10	90781323	90782200
chr10	90802023	90802365
chr10	90812659	90813057
chr10	90829784	90830166
chr10	90829784	90830166
chr10	90868060	90868594
chr10	90872500	90872852
chr10	90894467	90894958
chr10	90957488	90957872
chr10	90968063	90968714
chr10	90974803	90975229
chr10	91027901	91028323
chr10	91029133	91029762
chr10	91033288	91033787
chr10	91052455	91052818
chr10	91077920	91078280
chr10	91096353	91096753
chr10	91123967	91124240
chr10	91201430	91201831
chr10	91836858	91837284
chr10	92024562	92025256
chr10	92068378	92068772
chr10	92179950	92180418
chr10	92336602	92336985
chr10	92524918	92525473
chr10	92527461	92527843
chr10	92655842	92656186
chr10	92670615	92671734
chr10	92680813	92681204
chr10	92783776	92784145
chr10	92823059	92823465
chr10	92826834	92827226
chr10	92908648	92909036
chr10	93048031	93048535
chr10	93090774	93091049
chr10	93152129	93152551
chr10	93159136	93159670
chr10	93346462	93346968
chr10	93348348	93348726
chr10	93363459	93363865
chr10	93421889	93422480
chr10	93452176	93452727
chr10	93548435	93549079
chr10	93555583	93555882
chr10	93641319	93641833
chr10	93673336	93673761
chr10	93826470	93826859
chr10	93990226	93990642
chr10	94040542	94040914
chr10	94180388	94180829
chr10	94182356	94182871
chr10	94340992	94341678
chr10	94342525	94342869
chr10	94440431	94440820
chr10	94449326	94449735
chr10	94505899	94506501
chr10	94506926	94507386
chr10	94561627	94562264
chr10	94565788	94566175
chr10	94572056	94572440
chr10	94580649	94581180
chr10	94588907	94589201
chr10	94592741	94593124
chr10	94721719	94722179
chr10	94818828	94819077
chr10	94831129	94831560
chr10	94948896	94949298
chr10	95086432	95086950
chr10	95096366	95096844
chr10	95129491	95129882
chr10	95162901	95163611
chr10	95171928	95172282
chr10	95188516	95188798
chr10	95212662	95213069
chr10	95215452	95215907
chr10	95231917	95232349
chr10	95292107	95292559
chr10	95452167	95452622
chr10	95604761	95605247
chr10	95661601	95661903
chr10	95847377	95848101
chr10	96037111	96037485
chr10	96056829	96057558
chr10	96112535	96112973
chr10	96153277	96153783
chr10	96294978	96295513
chr10	96381264	96381678
chr10	96883100	96883445
chr10	96933319	96933663
chr10	96933319	96933663
chr10	96999096	96999936
chr10	97018187	97018612
chr10	97023106	97023573
chr10	97044468	97045591
chr10	97080783	97081308
chr10	97084223	97084600
chr10	97110846	97111224
chr10	97184372	97184757
chr10	97197496	97197809
chr10	97216963	97217425
chr10	97228712	97229128
chr10	97229808	97230197
chr10	97243017	97243606
chr10	97263860	97264250
chr10	97265217	97265595
chr10	97267328	97267708
chr10	97281751	97282224
chr10	97283241	97283861
chr10	97311218	97311628
chr10	97443825	97444198
chr10	97478995	97479438
chr10	97491972	97492343
chr10	97508301	97508815
chr10	97542518	97542948
chr10	97544327	97544793
chr10	97563707	97563973
chr10	97565610	97566011
chr10	97568338	97568750
chr10	97571433	97571963
chr10	97788784	97789178
chr10	97822463	97822822
chr10	97839772	97840264
chr10	97879460	97879973
chr10	98130502	98131304
chr10	98247025	98247398
chr10	98336149	98336497
chr10	98336990	98337359
chr10	98414345	98414840
chr10	98497998	98498400
chr10	98508223	98508595
chr10	98541132	98541578
chr10	98551085	98551748
chr10	98773447	98773866
chr10	98967589	98968086
chr10	99041733	99042162
chr10	99071021	99071549
chr10	99082440	99083021
chr10	99105232	99105611
chr10	99115175	99115608
chr10	99150827	99151334
chr10	99166221	99166740
chr10	99249928	99250307
chr10	99267713	99268368
chr10	99291931	99292337
chr10	99292855	99293251
chr10	99324262	99324784
chr10	99346446	99346811
chr10	99392262	99392753
chr10	99486802	99487169
chr10	99589838	99590291
chr10	99607704	99608110
chr10	99619199	99619506
chr10	99623098	99623530
chr10	99625073	99625464
chr10	99645729	99645930
chr10	99828626	99828915
chr10	99884224	99884685
chr10	99884476	99885593
chr10	99975422	99975943
chr10	100022392	100023381
chr10	100066452	100066879
chr10	100094234	100094501
chr10	100102855	100103264
chr10	100210472	100210849
chr10	100217226	100217668
chr10	100219369	100219749
chr10	100278264	100278666
chr10	100305800	100306183
chr10	100318270	100318663
chr10	101124640	101125002
chr10	101145484	101145895
chr10	101153473	101153859
chr10	101217309	101217643
chr10	101481472	101481924
chr10	101529148	101529590
chr10	101531540	101531934
chr10	101553620	101554023
chr10	101594320	101594731
chr10	101595052	101596215
chr10	101629951	101630280
chr10	101663197	101663651
chr10	101670521	101671165
chr10	101671689	101672117
chr10	101676660	101677049
chr10	101693752	101694042
chr10	101716087	101716462
chr10	101733026	101733389
chr10	101754993	101755684
chr10	101755998	101756789
chr10	101793713	101794081
chr10	101850422	101851024
chr10	101935795	101936437
chr10	101979196	101979630
chr10	102108772	102109167
chr10	102123607	102124052
chr10	102285459	102285931
chr10	102632507	102632890
chr10	102640392	102640866
chr10	102751147	102751614
chr10	102762933	102763351
chr10	102782004	102782814
chr10	102810117	102810822
chr10	102817595	102817971
chr10	102837411	102838015
chr10	102885058	102885339
chr10	102939516	102940313
chr10	103074301	103074714
chr10	103103422	103103850
chr10	103239796	103240190
chr10	103285781	103286143
chr10	103312737	103313191
chr10	103444423	103444870
chr10	103567862	103568391
chr10	103576156	103576546
chr10	103598138	103598569
chr10	103606354	103606742
chr10	103688033	103688459
chr10	103852048	103852543
chr10	103854141	103854640
chr10	103863028	103863549
chr10	103865219	103865893
chr10	103975371	103975625
chr10	103995080	103995939
chr10	104030359	104030807
chr10	104030607	104030851
chr10	104097013	104097525
chr10	104143795	104144104
chr10	104328994	104329511
chr10	104346867	104347276
chr10	104347992	104348370
chr10	104349478	104350048
chr10	104354119	104354531
chr10	104362535	104363024
chr10	104370958	104371674
chr10	104383078	104383425
chr10	104385169	104385556
chr10	104395157	104395538
chr10	104395979	104396261
chr10	104407757	104408136
chr10	104423542	104424147
chr10	104488534	104488904
chr10	104493554	104493956
chr10	104532376	104532759
chr10	104550324	104550900
chr10	104551701	104552116
chr10	104552855	104553266
chr10	104564236	104564621
chr10	104565481	104565926
chr10	104603751	104604056
chr10	104639226	104639635
chr10	104942244	104942803
chr10	104946874	104947289
chr10	105028424	105028852
chr10	105117411	105117851
chr10	105146159	105146614
chr10	105193511	105193899
chr10	105195904	105196343
chr10	105199478	105200144
chr10	105200759	105201161
chr10	105254111	105254519
chr10	105264892	105265292
chr10	105327021	105327355
chr10	105347205	105347687
chr10	105394885	105395273
chr10	105406820	105407168
chr10	105482832	105483260
chr10	105490420	105490786
chr10	105507469	105507876
chr10	105508609	105509018
chr10	105513500	105513883
chr10	105514883	105515281
chr10	105545364	105546087
chr10	105560756	105561100
chr10	105560673	105561127
chr10	105562211	105562609
chr10	105595800	105596193
chr10	105599924	105600505
chr10	105602673	105602957
chr10	105604016	105604656
chr10	105640084	105640514
chr10	105645169	105645678
chr10	105657929	105658411
chr10	105665532	105665918
chr10	105667578	105668132
chr10	105733211	105733358
chr10	105771734	105772193
chr10	105774023	105774466
chr10	105799210	105799618
chr10	105801445	105801852
chr10	105804057	105804759
chr10	105805010	105805247
chr10	105871112	105871756
chr10	106004520	106004743
chr10	106005434	106005845
chr10	106049754	106050180
chr10	106075832	106076263
chr10	106077726	106078138
chr10	106081135	106081717
chr10	106087287	106087745
chr10	106088184	106088659
chr10	106089090	106089339
chr10	106089886	106090431
chr10	106095743	106096154
chr10	106330472	106330896
chr10	110005075	110005429
chr10	111523137	111523712
chr10	111584964	111585344
chr10	111585916	111586296
chr10	111595451	111595924
chr10	111601519	111601927
chr10	111633908	111634744
chr10	111672575	111673158
chr10	111684966	111685318
chr10	111715091	111715555
chr10	111717079	111717541
chr10	111791934	111792326
chr10	111831636	111832029
chr10	111890891	111891330
chr10	111891546	111892099
chr10	111925968	111926381
chr10	111957603	111958274
chr10	111958772	111959306
chr10	112054669	112055068
chr10	112060532	112060718
chr10	112103003	112103462
chr10	112125941	112126441
chr10	112127820	112128164
chr10	112137446	112138127
chr10	112138147	112138544
chr10	112141534	112142657
chr10	112142548	112142912
chr10	112148227	112148645
chr10	112148846	112149767
chr10	112151497	112151871
chr10	112158082	112158404
chr10	112160155	112160543
chr10	112164176	112164659
chr10	112196694	112197503
chr10	112205772	112206181
chr10	112209805	112210350
chr10	112237026	112237477
chr10	112237803	112238193
chr10	112238834	112239217
chr10	112249179	112249626
chr10	112251048	112251412
chr10	112252336	112253153
chr10	112254079	112254580
chr10	112255304	112255620
chr10	112256022	112256919
chr10	112261733	112262123
chr10	112275137	112275427
chr10	112277408	112277894
chr10	112279276	112279652
chr10	112282913	112283389
chr10	112283520	112283881
chr10	112285834	112286271
chr10	112292872	112293177
chr10	112293594	112293975
chr10	112422082	112422581
chr10	112497864	112498395
chr10	112508776	112509063
chr10	112553463	112554290
chr10	112596818	112597190
chr10	112668365	112668751
chr10	113407832	113408346
chr10	113482158	113482743
chr10	114063382	114063832
chr10	114066987	114067353
chr10	114092809	114093614
chr10	114111607	114112095
chr10	114129735	114130140
chr10	114132994	114133332
chr10	114138877	114139560
chr10	114143781	114144984
chr10	114196391	114196822
chr10	114196632	114197072
chr10	114205119	114205624
chr10	114286388	114286757
chr10	114491669	114492081
chr10	114565346	114565853
chr10	114589702	114590092
chr10	114661320	114661775
chr10	114661938	114662803
chr10	114699432	114699845
chr10	114701551	114701982
chr10	114770745	114771122
chr10	114777245	114777861
chr10	114785572	114786055
chr10	114786897	114787341
chr10	114803642	114804028
chr10	114808587	114808971
chr10	114810154	114810703
chr10	114821101	114821504
chr10	114823486	114823962
chr10	114837246	114837630
chr10	114843480	114844008
chr10	114910116	114911010
chr10	114971385	114971833
chr10	114973505	114973894
chr10	115022918	115023897
chr10	115051057	115051469
chr10	115075887	115076327
chr10	115131601	115131978
chr10	115164231	115164676
chr10	115274631	115274736
chr10	115276823	115277378
chr10	115278697	115278967
chr10	115300089	115300508
chr10	115307223	115307605
chr10	115430141	115431007
chr10	115456381	115456740
chr10	115604296	115605272
chr10	115735636	115735966
chr10	115749186	115749668
chr10	115776489	115776917
chr10	115846529	115846973
chr10	115850940	115851426
chr10	115888320	115888700
chr10	115899391	115899703
chr10	115923301	115923633
chr10	115924246	115924825
chr10	115949050	115949418
chr10	116038209	116038521
chr10	116121954	116122365
chr10	116143129	116143759
chr10	116158981	116159134
chr10	116162810	116163209
chr10	116221108	116221506
chr10	116239192	116239492
chr10	116261576	116262050
chr10	116262438	116262765
chr10	116275986	116276689
chr10	116296632	116297245
chr10	116373646	116374398
chr10	116399324	116399733
chr10	116402659	116403042
chr10	116403682	116404091
chr10	116431234	116431784
chr10	116434080	116434507
chr10	116446682	116447086
chr10	116465134	116465518
chr10	116530130	116530600
chr10	116572465	116572756
chr10	116656210	116656600
chr10	116660886	116661245
chr10	116675500	116676022
chr10	117688669	117688988
chr10	117691660	117692084
chr10	118216226	118216614
chr10	118431792	118432176
chr10	118520863	118521257
chr10	118537396	118537900
chr10	118546367	118546784
chr10	118642539	118642988
chr10	118696609	118697041
chr10	118812582	118812964
chr10	118884169	118884552
chr10	118887706	118888382
chr10	118924385	118924697
chr10	118932867	118933241
chr10	119156196	119156608
chr10	119167649	119168030
chr10	119169384	119169777
chr10	119192454	119192889
chr10	119203927	119204402
chr10	119205948	119206321
chr10	119211329	119211713
chr10	119226195	119226470
chr10	119259303	119259652
chr10	119307741	119308319
chr10	119374393	119374757
chr10	119433809	119434546
chr10	119580285	119580727
chr10	119784267	119784787
chr10	119795375	119795873
chr10	120008775	120009178
chr10	120035559	120036006
chr10	120089990	120090391
chr10	120091536	120091913
chr10	120155502	120155902
chr10	120253858	120254594
chr10	120307513	120307901
chr10	120447899	120448307
chr10	120458146	120458526
chr10	120587922	120588319
chr10	120589139	120589948
chr10	120619736	120620435
chr10	120636127	120636515
chr10	120660843	120661244
chr10	120668300	120668538
chr10	120676882	120677264
chr10	120699964	120700302
chr10	120850295	120850638
chr10	120915981	120916424
chr10	120947454	120947981
chr10	120952432	120952824
chr10	120955667	120956077
chr10	120957735	120958161
chr10	120982882	120983244
chr10	120986991	120988216
chr10	121000759	121001196
chr10	121008028	121008462
chr10	121013756	121014190
chr10	121018636	121019067
chr10	121020514	121020892
chr10	121030165	121030482
chr10	121055302	121055663
chr10	121085550	121085972
chr10	121094224	121094454
chr10	121110154	121110678
chr10	121120361	121120751
chr10	121144860	121145164
chr10	121151378	121151830
chr10	121154476	121155298
chr10	121158359	121158795
chr10	121159390	121159805
chr10	121266919	121267274
chr10	121271370	121271786
chr10	121288291	121288728
chr10	121345545	121345823
chr10	121370188	121370661
chr10	121400251	121400733
chr10	121403914	121404492
chr10	121404952	121405552
chr10	121429627	121430010
chr10	121429859	121430011
chr10	121435978	121436893
chr10	121442866	121443207
chr10	121536960	121537361
chr10	121621349	121621711
chr10	121641833	121642116
chr10	122051710	122052124
chr10	122051752	122052124
chr10	122143918	122144785
chr10	122173653	122174000
chr10	122175905	122176120
chr10	122210308	122210669
chr10	122362322	122362721
chr10	122385456	122385745
chr10	122391305	122391546
chr10	122416846	122417207
chr10	122433713	122434308
chr10	122485921	122486450
chr10	122541187	122542082
chr10	122559893	122560310
chr10	122600561	122601115
chr10	122692288	122692713
chr10	123062122	123062311
chr10	123486082	123486468
chr10	123541470	123542217
chr10	123676714	123677253
chr10	123677634	123677958
chr10	123692309	123692708
chr10	123697451	123697809
chr10	123734081	123734488
chr10	123783756	123784202
chr10	123801159	123801574
chr10	123804033	123804568
chr10	123812752	123812960
chr10	123861470	123862313
chr10	123890356	123890794
chr10	123897976	123898409
chr10	123932705	123933083
chr10	124016755	124017155
chr10	124043973	124044401
chr10	124057423	124057728
chr10	124059921	124060098
chr10	124060203	124060600
chr10	124199969	124200213
chr10	124218725	124219108
chr10	124223568	124223960
chr10	124225023	124225454
chr10	124235270	124235636
chr10	124244331	124244809
chr10	124275329	124275597
chr10	124279740	124280145
chr10	124437790	124438533
chr10	124599488	124600192
chr10	124611297	124611721
chr10	124703540	124703943
chr10	124874220	124874573
chr10	124882059	124882833
chr10	124903494	124903872
chr10	124991301	124991726
chr10	125190064	125190472
chr10	125436602	125436990
chr10	125534062	125534739
chr10	125541703	125542393
chr10	125549842	125550294
chr10	125558428	125558660
chr10	125605209	125605603
chr10	125662966	125663864
chr10	125789028	125789601
chr10	125789908	125790409
chr10	125803475	125803871
chr10	125911619	125912017
chr10	125924328	125924784
chr10	125929386	125929752
chr10	126033334	126033907
chr10	126059362	126059774
chr10	126134943	126135407
chr10	126229176	126229496
chr10	126269393	126269779
chr10	126326369	126326768
chr10	126347338	126347707
chr10	126380019	126380434
chr10	126392263	126392660
chr10	126396711	126397086
chr10	126398016	126398421
chr10	126654345	126654712
chr10	126661817	126662455
chr10	126700859	126701285
chr10	126726477	126727096
chr10	126736040	126736252
chr10	126743831	126744124
chr10	126755423	126755750
chr10	126762696	126763051
chr10	126763760	126764075
chr10	126816235	126816632
chr10	126837080	126837608
chr10	126871162	126871593
chr10	126888127	126888440
chr10	127048566	127048868
chr10	127055900	127056307
chr10	127091340	127091722
chr10	127157615	127157911
chr10	127229031	127229521
chr10	127233379	127233817
chr10	127285122	127285230
chr10	127286426	127286831
chr10	127305286	127305674
chr10	127309125	127309564
chr10	127357766	127358509
chr10	127358212	127358542
chr10	127363129	127363534
chr10	127501784	127502184
chr10	127567969	127568447
chr10	127570937	127571359
chr10	127574148	127574545
chr10	127634291	127634927
chr10	127720285	127720709
chr10	127728406	127728784
chr10	127739127	127739524
chr10	127741019	127741421
chr10	127759474	127760016
chr10	127766723	127767132
chr10	127814490	127815154
chr10	127834520	127834903
chr10	127907653	127907983
chr10	127914999	127915518
chr10	127929472	127930023
chr10	127944786	127945063
chr10	127996505	127997001
chr10	128029052	128029490
chr10	128069678	128070045
chr10	128138741	128139106
chr10	128512060	128512584
chr10	128665482	128665870
chr10	128770039	128770393
chr10	128813603	128813977
chr10	128833471	128833815
chr10	128903366	128903777
chr10	128942521	128942853
chr10	128958580	128958965
chr10	129568793	129569214
chr10	129575950	129576329
chr10	129577938	129578372
chr10	129596099	129596493
[truncated: 37,439 more rows]
