# Supplementary material for: Tumor-specific retargeting of an oncogenic transcription factor chimera results in dysregulation of chromatin and transcription
Source: HighWire-hosted journal article supplement (doi:10.1101/gr.125666.111), 2011-11-15
Supplement: PatelSimon_TableS3.xlsx [file PatelSimon_TableS3.xlsx]

## Sheet: Legend
Patel and Simon Supplementary Table 3. Significantly Differentially Expressed Genes
Experiment Name	Cell Type	Comparison Made
EWS502 EWS-FLI vs Knockdown	EWS502	EWS-FLI knockdown only vs. EWS-FLI knockdown+EWS-FLI expression
EWS502 FLI1 vs Knockdown	EWS502	EWS-FLI knockdown only vs. EWS-FLI knockdown+FLI1 expression
HUVEC EWS-FLI vs Knockdown	HUVEC	FLI1 knockdown only vs. FLI1 knockdown+EWS-FLI expression
HUVEC FLI1 vs Knockdown	HUVEC	FLI1 knockdown only vs. FLI1 knockdown+FLI1 expression

## Sheet: EWS502 EWS-FLI vs Knockdown
Gene Symbol	RefSeq	p-value	Fold-Change
COLEC12	NM_130386	0.000189062	-8.99069
ARHGAP29	NM_004815	0.000313337	-8.80004
SLC26A7	NM_052832	0.000313973	-7.69626
FIGF	NM_004469	0.00184021	-6.7791
PGM5	NM_021965	0.000101869	-6.69362
TGFBI	NM_000358	0.00157703	-6.68206
PRRX1	NM_006902	8.04e-05	-6.61538
THBS1	NM_003246	0.00112349	-6.59282
ANGPT1	NM_001146	0.000853508	-6.51329
SPARCL1	NM_004684	0.00274788	-6.48621
SERPINB7	NM_003784	0.00181534	-6.44533
HIST1H2BD	NM_138720	0.0198193	-6.34665
ASPN	NM_017680	0.0024763	-6.07018
ACTC1	NM_005159	0.000517809	-5.95217
TGFB2	NM_003238	0.000319949	-5.70598
LAMA4	NM_001105206	0.000119613	-5.6264
DKK1	NM_012242	0.00335634	-5.53256
RARB	NM_000965	0.00264228	-5.53016
EFEMP1	NM_004105	0.00100246	-5.48269
OLFML2B	NM_015441	9.45e-05	-5.33914
CALB2	NM_001740	0.00337803	-5.23475
ADAMTS5	NM_007038	0.00016115	-5.0877
SULF2	NM_018837	0.000204158	-5.06029
CCDC80	NM_199511	0.00147896	-4.97513
POSTN	NM_006475	0.000984626	-4.94582
AKR1C2	NM_205845	0.000354981	-4.93205
LRRTM4	NM_024993	0.000781246	-4.78625
FLJ45803	NM_207429	8.35e-05	-4.71899
C7	NM_000587	0.00290676	-4.68185
ISLR	NM_005545	0.00238285	-4.6508
hCG_2033039	NM_138378	0.00188013	-4.64888
SEPP1	NM_001093726	0.00250071	-4.64071
CXCL14	NM_004887	0.00271019	-4.58092
TCP11L2	NM_152772	0.000527822	-4.3874
CAPN6	NM_014289	0.000907069	-4.34399
MSTN	NM_005259	0.0274019	-4.28386
SLC18A3	NM_003055	0.0058437	-4.2497
ADAMTS9	NM_182920	0.00211017	-4.12555
SLC16A4	NM_004696	9.68e-05	-4.10757
PDE5A	NM_001083	0.000784309	-4.08935
GAS2	NM_177553	0.000138773	-4.03537
CYR61	NM_001554	0.00231808	-4.01658
DCN	NM_001920	0.00783995	-3.92254
MTUS1	NM_001001924	0.00277895	-3.86084
HGF	NM_000601	0.00295359	-3.85949
DCLK1	NM_004734	2.91e-05	-3.81857
PLCB1	NM_182734	0.00505816	-3.74093
DYNC1I1	NM_004411	0.000662765	-3.70662
EMCN	NM_016242	0.0253714	-3.68921
FBXO32	NM_058229	0.0102961	-3.68663
ATP8B1	NM_005603	0.003686	-3.67265
IL13RA1	NM_001560	0.000792118	-3.6088
HMGCS2	NM_005518	0.00294673	-3.58071
ACRBP	NM_032489	6.38e-06	-3.57611
ENPP2	NM_006209	0.0015738	-3.54744
S1PR1	NM_001400	0.0242394	-3.50759
IL12A	NM_000882	0.000133254	-3.50411
LGI2	NM_018176	0.000212975	-3.50287
FAM46C	NM_017709	0.00121792	-3.48763
BDH2	NM_020139	0.017972	-3.45652
ARHGAP28	NM_001010000	0.0003118	-3.44115
NEFL	NM_006158	7.62e-05	-3.42909
OSBPL10	NM_017784	0.004757	-3.41714
MGP	NM_000900	0.00211095	-3.39642
TOX	NM_014729	0.000295488	-3.37327
NAV3	NM_014903	0.000162494	-3.36046
RAB6C	NM_032144	0.0222885	-3.35695
LRRN3	NM_001099660	0.000603057	-3.35201
SOX5	NM_152989	0.000413607	-3.31587
CYP1B1	NM_000104	0.00142745	-3.29568
PCDH18	NM_019035	0.000444997	-3.2948
CDH3	NM_001793	0.000115712	-3.28052
ABCA1	NM_005502	0.00372687	-3.27801
TMEM133	NM_032021	0.00567779	-3.24102
AQP1	NM_198098	0.000317823	-3.22896
TNC	NM_002160	0.00224769	-3.21447
NRP1	NM_003873	0.000326585	-3.19536
TAGLN	NM_001001522	0.00587361	-3.1917
LOX	NM_002317	0.0189414	-3.1895
ITGA4	NM_000885	0.00128688	-3.18366
COL3A1	NM_000090	0.00168941	-3.18274
MYST4	NM_012330	0.00118731	-3.15162
MFAP4	NM_002404	0.0025167	-3.13233
GAB2	NM_080491	0.000186614	-3.12814
LRIG3	NM_153377	0.000320893	-3.12364
PRSS23	NM_007173	0.00820929	-3.11299
EPAS1	NM_001430	0.00533721	-3.10672
RGS5	NM_003617	0.0107928	-3.10344
DACH1	NM_080759	0.0017962	-3.08515
SRPX2	NM_014467	0.000163098	-3.03258
SNCAIP	NM_005460	0.000320118	-3.02964
CTGF	NM_001901	0.00736644	-3.01734
CCDC3	NM_031455	0.00122062	-3.00046
GSN	NM_000177	0.00114024	-2.99962
SFRP1	NM_003012	0.00244913	-2.98965
CDH6	NM_004932	0.000922709	-2.9826
PHLDA1	NM_007350	0.00047805	-2.98219
AKR1C3	NM_003739	0.0143055	-2.97518
SELENBP1	NM_003944	0.00174307	-2.96614
ZFP36L1	NM_004926	0.000706369	-2.9581
NT5E	NM_002526	0.00552829	-2.95253
ACSF2	NM_025149	0.00279502	-2.94492
CADM1	NM_014333	0.000343789	-2.94406
GJA5	NM_005266	0.02255	-2.94113
TP53INP1	NM_033285	5.52e-05	-2.94108
FAP	NM_004460	0.015515	-2.93679
EYA1	NM_000503	0.000321241	-2.927
FREM1	NM_144966	0.00132774	-2.91821
OSR2	NM_053001	0.00135033	-2.91259
ADAMTSL1	NM_001040272	0.000140358	-2.90419
C1QTNF3	NM_181435	0.000609547	-2.8912
GRPR	NM_005314	0.000778695	-2.88843
ZNF521	NM_015461	0.000712182	-2.88809
SOSTDC1	NM_015464	0.00251259	-2.87115
OGN	NM_033014	0.00254239	-2.86788
SRGAP1	NM_020762	7.37e-05	-2.84358
SLC40A1	NM_014585	0.00458541	-2.84214
HAS2	NM_005328	0.0100423	-2.83639
TGFBR3	NM_003243	0.0020882	-2.83522
CALCOCO1	NM_020898	0.000765386	-2.8279
DTNA	NM_001390	0.00242574	-2.8199
PLSCR4	NM_020353	0.00355918	-2.81461
MPPED2	NM_001584	0.000589752	-2.80268
SESN3	NM_144665	0.00274771	-2.80187
GNAI1	NM_002069	0.00497474	-2.79769
CXCL12	NM_000609	0.000157324	-2.79014
SNAI2	NM_003068	0.0019114	-2.77397
PDE7B	NM_018945	0.00388345	-2.77303
HSD17B14	NM_016246	0.0025725	-2.76316
PCDHB3	NM_018937	0.0090789	-2.7419
CXCR4	NM_001008540	0.00282924	-2.74001
RIMS2	NM_001100117	0.00326053	-2.73515
MSC	NM_005098	0.00130344	-2.73243
RUNX1T1	NM_175636	0.00664806	-2.7256
SLC20A2	NM_006749	0.000537891	-2.72346
ZNF503	NM_032772	0.00185163	-2.72268
PXDNL	NM_144651	0.0107169	-2.71633
STC1	NM_003155	0.000310426	-2.71245
MMP2	NM_004530	0.000711696	-2.70911
TMEM88	NM_203411	0.00678005	-2.70845
SAT1	NM_002970	0.0284943	-2.70642
TEAD1	NM_021961	0.000196753	-2.69092
PLAU	NM_002658	0.00276039	-2.66988
TMEM159	NM_020422	0.00360464	-2.66044
RIMS3	NM_014747	0.000170879	-2.65158
SERPINF1	NM_002615	0.0174002	-2.64808
IL17RD	NM_017563	0.00152998	-2.64601
DAB2	NM_001343	0.00673387	-2.64462
PDGFD	NM_025208	0.00166568	-2.64171
SLC35D2	NM_007001	0.00127597	-2.6386
GLIPR1	NM_006851	0.011017	-2.62858
AMY2B	NM_020978	0.00968857	-2.59228
ECM2	NM_001393	0.00715086	-2.59188
ALPK2	NM_052947	0.0125371	-2.57481
LCE2D	NM_178430	0.0101949	-2.57182
PDZRN3	NM_015009	0.0216755	-2.56968
VASN	NM_138440	0.000653962	-2.56838
MAML2	NM_032427	1.06e-05	-2.56723
KAL1	NM_000216	0.000147627	-2.56426
ATP1B1	NM_001677	0.00289784	-2.5629
TGFBR2	NM_001024847	0.00375456	-2.56273
CCKAR	NM_000730	0.00502973	-2.55361
EGR1	NM_001964	3.39e-05	-2.5502
DHRS3	NM_004753	0.00139829	-2.54913
FZD5	NM_003468	0.0116854	-2.54366
ARPP-21	NM_016300	0.0165895	-2.53222
SATB1	NM_002971	0.00187128	-2.52941
ATXN1	NM_000332	0.00125212	-2.52121
NRCAM	NM_001037132	0.00218099	-2.51833
GAB1	NM_207123	0.000360267	-2.5144
TCF7L2	NM_030756	0.000431938	-2.50736
MBP	NM_001025100	0.00292945	-2.5051
LOC221091	NM_203422	0.0239459	-2.5
RSPO3	NM_032784	0.00113854	-2.49237
NID2	NM_007361	0.00696129	-2.48692
MATN2	NM_002380	0.00301878	-2.47676
BMP7	NM_001719	0.000720087	-2.46089
REPS2	NM_004726	0.00167245	-2.45741
CXXC4	NM_025212	0.0024417	-2.45676
MID2	NM_012216	0.00584565	-2.44787
NFKBIZ	NM_031419	0.00591	-2.4467
LRP10	NM_014045	0.00265026	-2.44286
PLCL1	NM_001114661	0.00478423	-2.4376
C9orf103	NM_001001551	0.0204362	-2.43182
ZDHHC2	NM_016353	0.000555143	-2.43014
CDC42EP3	NM_006449	0.043679	-2.42439
HAS3	NM_005329	0.000304989	-2.4205
FERMT2	NM_006832	0.00395935	-2.40786
FBN1	NM_000138	0.000448615	-2.40653
PBX3	NM_006195	0.00632986	-2.3932
RDH10	NM_172037	0.00649826	-2.39288
EFEMP2	NM_016938	0.000529691	-2.38711
ST6GAL2	NM_032528	0.00059882	-2.38444
C21orf7	NM_020152	0.000197842	-2.38336
TPP1	NM_000391	0.000568859	-2.36445
PTPRM	NM_001105244	0.000226984	-2.35354
C7orf41	NM_152793	0.000510749	-2.35326
ITGB8	NM_002214	0.0119055	-2.35129
GULP1	NM_016315	0.00648144	-2.34748
KCNAB1	NM_003471	0.00485897	-2.3452
TSPAN18	NM_130783	0.000997231	-2.34487
SCN9A	NM_002977	0.0184504	-2.34482
SHOX2	NM_006884	0.00060137	-2.34305
VCL	NM_014000	0.000312013	-2.34236
AMOT	NM_133265	0.00464161	-2.34007
CTSF	NM_003793	0.00383093	-2.3322
MEIS2	NM_172316	0.00513222	-2.31947
IRGC	NM_019612	0.0183057	-2.31372
ADCY6	NM_015270	0.000892424	-2.31263
ACSS3	NM_024560	0.00660289	-2.30983
FNDC5	NM_153756	0.00877051	-2.3049
ALDH1A3	NM_000693	0.000205745	-2.30268
GPR146	NM_138445	0.000909689	-2.30053
CDON	NM_016952	0.000308943	-2.29514
CDH10	NM_006727	0.0276735	-2.29191
FAM107A	NM_007177	0.00103625	-2.28767
MLC1	NM_015166	0.000406728	-2.28357
FGF5	NM_004464	0.0445369	-2.28177
CPE	NM_001873	0.00614769	-2.28026
IGFBP5	NM_000599	0.000481658	-2.27972
SYNGR4	NM_012451	0.0146526	-2.2761
PPM2C	NM_018444	0.000463014	-2.27541
ZNF491	NM_152356	0.0109065	-2.27328
CA14	NM_012113	0.000994702	-2.2705
GOLGA8B	NM_001023567	0.00337773	-2.26143
RASSF9	NM_005447	0.00430434	-2.24792
KIAA1305	NM_025081	0.00018322	-2.24774
IL11RA	NM_147162	0.00475416	-2.24274
PLAT	NM_000930	0.0161497	-2.24077
EBF1	NM_024007	0.000509503	-2.23646
PALLD	NM_016081	0.00291124	-2.23399
HIST1H4H	NM_003543	0.0302349	-2.23372
TLE1	NM_005077	0.00124649	-2.22919
ALDH1A1	NM_000689	0.000701332	-2.22828
BTBD8	NM_183242	0.0199959	-2.22581
CLIP3	NM_015526	0.000585461	-2.22156
OLIG3	NM_175747	0.0183687	-2.22116
KLHL4	NM_019117	0.000399355	-2.21542
BCHE	NM_000055	0.0275428	-2.21071
HBP1	NM_012257	0.00237909	-2.20973
KLHL24	NM_017644	8.8e-05	-2.20945
CD24	NM_013230	0.00427971	-2.2043
VCAM1	NM_001078	0.0397021	-2.20272
STAT2	NM_005419	0.000304377	-2.20252
BTG1	NM_001731	0.000357159	-2.19859
RIN2	NM_018993	0.00239975	-2.18979
SCHIP1	NM_014575	0.00182317	-2.18448
BCL2	NM_000633	0.00282364	-2.18091
SLC14A1	NM_015865	0.00079221	-2.17634
TXNDC13	NM_021156	0.00382654	-2.17433
LTBP1	NM_206943	0.0113182	-2.17297
ZNF436	NM_001077195	0.000150978	-2.17013
PBXIP1	NM_020524	0.000754013	-2.16623
MID1	NM_000381	6.36e-05	-2.16281
CDK6	NM_001259	0.0437605	-2.16262
AIG1	NM_016108	0.00263031	-2.15683
MAF	NM_001031804	0.000859009	-2.15072
NRIP1	NM_003489	0.0149873	-2.14961
IFIT2	NM_001547	0.00596204	-2.14697
SIDT2	NM_001040455	7.41e-05	-2.14427
DOCK9	NM_015296	0.00261388	-2.14385
NOPE	NM_020962	0.00306474	-2.14006
P2RY5	NM_005767	0.0322763	-2.13721
SLFN5	NM_144975	0.0154872	-2.13637
SORCS1	NM_052918	0.00162675	-2.13535
IKZF2	NM_001079526	0.0277652	-2.12656
ELL2	NM_012081	0.0372027	-2.12419
SPRED1	NM_152594	0.0047593	-2.12297
C18orf1	NM_181481	0.00674418	-2.12089
LIMA1	NM_001113546	0.000256843	-2.11612
ID3	NM_002167	0.013618	-2.11529
MPP4	NM_033066	0.00790104	-2.11372
SULF1	NM_015170	0.00811302	-2.11339
RIPK1	NM_003804	0.00135497	-2.10216
RBMS3	NM_001003793	0.00183419	-2.10169
SPRY1	NM_005841	0.0452896	-2.09901
GOLGA8A	NM_181077	0.00784858	-2.09811
MSRB3	NM_001031679	0.0308398	-2.09747
ING4	NM_016162	0.0387716	-2.09552
HEG1	NM_020733	0.0349413	-2.09452
YPEL3	NM_031477	0.00752104	-2.09418
KREMEN1	NM_001039570	0.013309	-2.09336
CTHRC1	NM_138455	0.0247431	-2.09218
SPOCK3	NM_001040159	0.0130749	-2.09054
TMTC2	NM_152588	0.00978055	-2.08838
ATP2B1	NM_001001323	0.0018956	-2.08665
HSN2	NM_213655	0.00429851	-2.08518
CD59	NM_203330	0.00624086	-2.08408
GRIA1	NM_000827	0.0149489	-2.0836
CREB3L1	NM_052854	0.0051294	-2.07846
C2orf67	NM_152519	0.0258847	-2.07234
DNAJC15	NM_013238	0.0153201	-2.07007
JRKL	NM_003772	0.00226196	-2.06718
TBC1D19	NM_018317	0.0208976	-2.06266
ADRA1A	NM_000680	0.00136324	-2.06254
GPM6A	NM_005277	0.00649358	-2.06071
QPRT	NM_014298	0.048228	-2.06063
SERTAD4	NM_019605	0.00606942	-2.0589
BAZ2B	NM_013450	0.010701	-2.0587
DSCAM	NM_001389	0.0086695	-2.05726
MAN2A1	NM_002372	0.00418346	-2.05496
BVES	NM_147147	0.00790502	-2.05237
ZNF423	NM_015069	6.05e-05	-2.05193
SH3BP5	NM_004844	0.00902164	-2.04824
NFIA	NM_005595	0.00186624	-2.04598
PGCP	NM_016134	0.0294087	-2.04551
ASAH1	NM_177924	0.0448156	-2.04084
NEFM	NM_005382	0.000175052	-2.04072
LRRC1	NM_018214	0.00399811	-2.03762
HIST4H4	NM_175054	0.00431895	-2.03729
ANKRD6	NM_014942	0.00104233	-2.03584
KCNJ8	NM_004982	0.0322205	-2.03538
C20orf79	NM_178483	0.00924714	-2.03482
WSB1	NM_015626	0.0032109	-2.03477
SVIL	NM_021738	0.00041317	-2.03417
OR1L1	NM_001005236	0.00295668	-2.03344
MAP2	NM_002374	0.00100463	-2.03148
TK2	NM_004614	0.00119332	-2.03147
TPM1	NM_000366	0.000963893	-2.02887
PLK2	NM_006622	0.00655628	-2.02778
TEAD1	NM_021961	0.00174794	-2.02749
SPATA20	NM_022827	9.22e-05	-2.02527
BACH1	NM_206866	0.00410925	-2.02151
C15orf52	NM_207380	0.00098128	-2.01893
DOK5	NM_018431	0.00634484	-2.01126
C1orf218	NM_019049	0.0303753	-2.01093
FRMD6	NM_001042481	0.000953701	-2.01008
CAPRIN2	NM_001002259	0.0385025	-2.00979
DAAM1	NM_014992	0.0192122	-2.00946
PLCD4	NM_032726	0.0119006	-2.00938
SLC7A8	NM_012244	0.00124312	-2.00581
FBP1	NM_000507	0.00365773	-2.005
LRMP	NM_006152	0.000509914	-2.0044
WDR78	NM_024763	0.0153953	-2.0029
EFCAB2	NM_032328	0.0181751	-2.00057
GNS	NM_002076	0.000828221	-1.99819
TBCEL	NM_152715	0.0050783	-1.9932
KBTBD10	NM_006063	0.00426249	-1.99275
DCX	NM_000555	0.0178863	-1.99209
PARP14	NM_017554	0.0098507	-1.99207
SSFA2	NM_006751	0.00599942	-1.99112
RP5-1022P6.2	NM_019593	0.000609266	-1.99009
C20orf19	NM_018474	0.0332554	-1.98881
DENND1B	NM_144977	0.0416349	-1.98595
HTR1D	NM_000864	0.0489314	-1.9856
SNX25	NM_031953	0.0273723	-1.98318
TFPI	NM_006287	0.0422802	-1.97999
SOCS1	NM_003745	0.0468997	-1.97859
CCDC50	NM_178335	0.0202368	-1.97827
TMEM155	NM_152399	0.0135342	-1.97734
PCDHB4	NM_018938	0.0440826	-1.97574
PPAP2A	NM_003711	0.0215943	-1.9757
GPM6B	NM_001001995	0.00341147	-1.97472
BNC2	NM_017637	0.00613377	-1.97163
RPH3A	NM_014954	0.00090471	-1.96974
ARMCX1	NM_016608	0.0175831	-1.96935
METTL7A	NM_014033	0.00179726	-1.96767
IGSF11	NM_001015887	0.00233255	-1.96655
HSPA12A	NM_025015	0.00139978	-1.9585
RPRM	NM_019845	0.00551062	-1.95736
TRAF3IP2	NM_147686	0.00584094	-1.95428
FOXO1	NM_002015	0.000878166	-1.94971
VCAN	NM_004385	0.0012481	-1.94575
AHSA2	NM_152392	0.00865123	-1.94531
FLJ20160	NM_017694	0.019083	-1.94025
PGPEP1	NM_017712	0.00186743	-1.93766
PYGL	NM_002863	0.00277442	-1.9371
CYP20A1	NM_177538	0.020206	-1.93628
BACH2	NM_021813	0.0218376	-1.93552
NCOA2	NM_006540	0.00114913	-1.93383
EPS8	NM_004447	0.00522538	-1.92715
PDZD2	NM_178140	0.0153563	-1.92473
MANBA	NM_005908	0.00819498	-1.92106
OLFML2A	NM_182487	0.0061776	-1.92101
SSBP2	NM_012446	0.0302559	-1.91715
CABLES1	NM_001100619	0.000202599	-1.91706
UBA7	NM_003335	0.00876106	-1.91695
PDGFRL	NM_006207	0.000114927	-1.91651
TTC18	NM_145170	0.00837976	-1.91598
MBNL3	NM_018388	0.00270548	-1.91457
HNMT	NM_006895	0.00658498	-1.91425
CLIP4	NM_024692	0.00254788	-1.91396
H2AFJ	NM_177925	0.0120013	-1.91135
AVIL	NM_006576	0.000136937	-1.91072
NOG	NM_005450	0.0209273	-1.90895
DPYS	NM_001385	0.0069503	-1.90788
HDAC5	NM_005474	0.0011913	-1.90694
MME	NM_007288	0.0258585	-1.90667
INHBA	NM_002192	0.0200368	-1.90633
RCBTB2	NM_001268	0.00115787	-1.90384
AGBL2	NM_024783	0.01	-1.90327
FREM2	NM_207361	0.000729365	-1.90319
SMAD9	NM_005905	0.001372	-1.90316
LEFTY2	NM_003240	0.0477229	-1.90135
DLC1	NM_182643	0.00606324	-1.90061
SGSH	NM_000199	0.00174009	-1.89831
JAG1	NM_000214	0.0219555	-1.89724
DCLK2	NM_001040260	0.00175201	-1.89672
YAP1	NM_006106	0.000328127	-1.8924
KANK1	NM_153186	0.0012383	-1.89038
C5orf13	NM_004772	0.00718769	-1.8887
SIPA1L2	NM_020808	0.0272948	-1.88789
ZNF827	NM_178835	0.00137267	-1.88615
HOXB5	NM_002147	0.00511596	-1.88367
CTSO	NM_001334	0.0238609	-1.88363
CREBL2	NM_001310	0.00805481	-1.88067
DENND4C	NM_017925	0.0437904	-1.88034
PAPSS2	NM_004670	0.00816944	-1.87991
AKTIP	NM_001012398	0.0202326	-1.87829
RANBP3L	NM_145000	0.0288221	-1.87824
SNTB1	NM_021021	0.010378	-1.87494
IGFBP4	NM_001552	0.00226286	-1.87452
IRF2	NM_002199	0.00997704	-1.87389
FLJ31818	NM_152556	0.0106176	-1.87354
EPHX2	NM_001979	0.0021093	-1.87229
TSHZ3	NM_020856	0.00432753	-1.87205
LAMB2	NM_002292	0.00505646	-1.87156
SAMD9	NM_017654	0.0238786	-1.87026
COBLL1	NM_014900	0.0106936	-1.87023
CALD1	NM_033138	0.0124129	-1.87023
NXPH4	NM_007224	0.00490072	-1.87004
SALL1	NM_002968	0.00337485	-1.86999
PPFIBP1	NM_003622	0.000652705	-1.8693
CYBRD1	NM_024843	0.0106997	-1.86831
BTN3A1	NM_007048	0.0435942	-1.86686
SNX33	NM_153271	0.0030012	-1.86647
SMARCA2	NM_003070	0.000770362	-1.86153
PCDHB10	NM_018930	0.0118286	-1.86074
PCTK2	NM_002595	0.0050043	-1.85853
DFNA5	NM_004403	0.00912689	-1.85851
DSEL	NM_032160	0.00184749	-1.85412
TSPAN5	NM_005723	0.000465008	-1.8524
SEMA6A	NM_020796	0.00687593	-1.84848
DDIT4L	NM_145244	0.0173359	-1.84829
MEF2C	NM_002397	0.0366646	-1.84824
PTGIR	NM_000960	0.0359291	-1.84342
LRP1	NM_002332	8.85e-05	-1.84217
GLRA2	NM_002063	0.0199126	-1.84165
RBMS1	NM_016839	0.00219331	-1.838
C1orf183	NM_019099	0.0309118	-1.83387
CFLAR	NM_003879	0.0158373	-1.82969
GLI3	NM_000168	0.00378261	-1.82967
LRRC17	NM_005824	0.00929537	-1.82947
ISYNA1	NM_016368	0.00377288	-1.82811
GSTM2	NM_000848	0.0288692	-1.8263
GYPE	NM_198682	0.0110745	-1.82592
GALT	NM_000155	0.000847669	-1.82387
SLC2A12	NM_145176	0.021065	-1.82211
MGC24039	NM_144973	0.00681835	-1.82192
CDH11	NM_001797	0.00577598	-1.82057
TGFBR1	NM_004612	6.73e-06	-1.81989
SKIL	NM_005414	0.0101371	-1.8198
VLDLR	NM_003383	0.000247782	-1.81954
C10orf10	NM_007021	0.00536009	-1.81894
HIST2H2BF	NM_001024599	0.0440421	-1.81768
ELK3	NM_005230	0.000963244	-1.817
METTL7B	NM_152637	0.0046016	-1.81674
CACNA2D1	NM_000722	0.0346576	-1.81407
ENOX1	NM_017993	0.015617	-1.81158
JMJD1C	NM_032776	0.0217089	-1.81011
COPZ2	NM_016429	0.00922603	-1.80765
PPAP2B	NM_003713	0.000799466	-1.80546
RNF146	NM_030963	0.028053	-1.80542
ADAMTS1	NM_006988	0.000152129	-1.80498
C1R	NM_001733	0.00815399	-1.80492
SAMD8	NM_144660	0.00191322	-1.8041
FGD6	NM_018351	0.018422	-1.80274
APOBEC3F	NM_145298	0.0191046	-1.80033
FHL1	NM_001449	0.00880268	-1.79926
GPR153	NM_207370	0.00651622	-1.79886
BMF	NM_001003940	0.0150958	-1.79673
ITM2B	NM_021999	0.0219934	-1.79533
PCDHB14	NM_018934	0.0479	-1.79487
CCDC128	NM_152994	0.0383706	-1.79477
MBNL2	NM_144778	0.000400202	-1.79409
ZFHX4	NM_024721	0.00507675	-1.79399
RGS8	NM_001102450	0.0374772	-1.79278
RRAGB	NM_016656	0.00439418	-1.78911
PCDHB13	NM_018933	0.0302695	-1.78721
FSTL4	NM_015082	0.0139722	-1.78601
C1RL	NM_016546	0.0058217	-1.78522
EPHA4	NM_004438	0.00177077	-1.7847
NEXN	NM_144573	0.0127654	-1.78031
SLC6A16	NM_014037	0.00636961	-1.77857
TRPA1	NM_007332	0.0311553	-1.77637
PHLDB1	NM_015157	0.00154406	-1.77587
ID1	NM_181353	0.0346436	-1.77426
MAPK10	NM_138980	0.0112327	-1.77411
MCOLN3	NM_018298	0.00957535	-1.77108
ADAMTSL1	NM_001040272	0.0107555	-1.77049
MGC16703	NR_003608	0.0411946	-1.77013
TFAP2A	NM_003220	0.00150886	-1.76838
ARPC4	NM_005718	0.00396441	-1.76837
CCDC25	NM_018246	0.00222548	-1.7662
TNS3	NM_022748	0.0100106	-1.76487
MALAT1	NR_002819	0.00423722	-1.76333
ARSJ	NM_024590	0.0188793	-1.76281
RGS2	NM_002923	7.75e-05	-1.76246
ITPR1	NM_001099952	0.0189464	-1.75813
RBMS2	NM_002898	0.00609213	-1.75541
BOC	NM_033254	0.00574876	-1.75455
CPA2	NM_001869	0.0271531	-1.7523
COL5A2	NM_000393	0.0146649	-1.75214
FAM101A	NM_181709	0.00759038	-1.75011
GLT8D2	NM_031302	0.0220564	-1.7494
BAI2	NM_001703	0.00807744	-1.74827
RHOBTB1	NM_014836	0.00980786	-1.74701
CHL1	NM_006614	0.000896917	-1.74668
GDF11	NM_005811	0.00286927	-1.74639
RHOC	NM_175744	0.00550416	-1.74624
VGLL3	NM_016206	0.00692431	-1.74622
GARNL3	NM_032293	0.0051234	-1.74461
GABPA	NM_002040	0.00760581	-1.74374
NRBP2	NM_178564	0.000600964	-1.74181
RASSF3	NM_178169	0.0122302	-1.73818
PERLD1	NM_033419	0.00394533	-1.73683
ITM2C	NM_030926	0.00983838	-1.73627
TRAK1	NM_001042646	0.00293355	-1.73495
PROX1	NM_002763	0.0166932	-1.73478
MCC	NM_001085377	0.0240507	-1.73311
CYGB	NM_134268	0.0429816	-1.73281
CD82	NM_002231	0.00719529	-1.73276
FLJ22662	NM_024829	0.00792713	-1.73134
TMEM55A	NM_018710	0.00552608	-1.73079
CHRDL1	NM_145234	0.0391765	-1.73013
REV3L	NM_002912	0.0282313	-1.72991
SYT11	NM_152280	0.000910224	-1.72966
CRABP1	NM_004378	0.000530535	-1.72932
DHRS7	NM_016029	0.00971548	-1.72748
CRB1	NM_201253	0.000644256	-1.72648
BLNK	NM_013314	0.0162573	-1.72216
SIM2	NM_009586	0.001473	-1.72154
CD200	NM_001004196	0.031256	-1.72091
RERG	NM_032918	0.0486148	-1.71929
TJP1	NM_003257	0.0134925	-1.71788
GAS1	NM_002048	0.0189195	-1.71785
PARVA	NM_018222	0.00133558	-1.71757
LAYN	NM_178834	0.0192316	-1.71753
FBLN5	NM_006329	0.0178583	-1.71746
ANGPTL2	NM_012098	0.0136451	-1.71711
DACT1	NM_016651	0.00484899	-1.71679
APOBEC3G	NM_021822	0.016621	-1.71669
TNFRSF25	NM_148965	0.0122497	-1.71556
SPG11	NM_025137	0.0399168	-1.71195
ZYX	NM_003461	0.0100954	-1.71175
GBE1	NM_000158	0.0243872	-1.71128
CACNA1C	NM_000719	0.00359321	-1.71091
ZNF768	NM_024671	0.0255745	-1.70955
SYK	NM_003177	0.00514119	-1.70923
RAB38	NM_022337	0.0419774	-1.70882
TRPC1	NM_003304	0.0174088	-1.70881
PCAF	NM_003884	0.0394753	-1.70764
TMEM63A	NM_014698	0.00486472	-1.7067
FAM12B	NM_022360	0.0197917	-1.70557
VPREB3	NM_013378	0.0321465	-1.70364
ZEB1	NM_030751	0.00198722	-1.7019
JUB	NM_032876	0.00489163	-1.70158
SLC44A1	NM_080546	0.00832289	-1.69943
LPIN2	NM_014646	0.000144983	-1.69837
PDE3A	NM_000921	0.0180571	-1.69789
MUM1	NM_032853	5.97e-05	-1.69623
BCAS3	NM_001099432	0.00426613	-1.69526
PTPRG	NM_002841	0.00350982	-1.69423
SEC31B	NM_015490	0.00175827	-1.69412
MED13L	NM_015335	0.00146856	-1.69397
TUBG2	NM_016437	0.00264943	-1.69394
GPRC5B	NM_016235	0.00319501	-1.6921
MAGI2	NM_012301	0.00328072	-1.69146
SLC26A10	NM_133489	0.00207219	-1.69085
SLC26A11	NM_173626	0.00492011	-1.69077
TLE4	NM_007005	0.000541004	-1.68757
ABHD2	NM_007011	0.0221382	-1.68725
TUFT1	NM_020127	0.0173869	-1.6872
SH3RF1	NM_020870	0.00458655	-1.68661
CTDSP2	NM_005730	0.000886283	-1.68477
H1F0	NM_005318	0.0142651	-1.68443
TES	NM_015641	0.0125248	-1.68443
CARD6	NM_032587	0.0208415	-1.68346
PHYH	NM_006214	0.00741039	-1.68244
KLF7	NM_003709	0.035026	-1.68115
MMP11	NM_005940	0.0337676	-1.68099
CYLD	NM_015247	0.00140788	-1.68053
CASD1	NM_022900	0.035451	-1.67877
HIF3A	NM_152794	0.00898497	-1.67825
GPC6	NM_005708	0.0149459	-1.67789
GALNT5	NM_014568	0.0116577	-1.67781
IMMP2L	NM_032549	0.0180113	-1.67746
KLHDC8B	NM_173546	0.00398246	-1.67654
SLC46A3	NM_181785	0.00229557	-1.67572
LAMB1	NM_002291	0.0011205	-1.67539
PAX9	NM_006194	0.0440517	-1.67485
HDAC11	NM_024827	0.0235583	-1.67444
TMOD1	NM_003275	0.0345882	-1.67413
GRN	NM_002087	0.0015902	-1.67404
PCMTD2	NM_018257	0.0225835	-1.67388
MTMR10	NM_017762	0.00208475	-1.67291
ORAI3	NM_152288	0.0248057	-1.67245
CCDC82	NM_024725	0.00646512	-1.67121
AXL	NM_021913	0.0143422	-1.67086
RND3	NM_005168	0.0334094	-1.66982
CMTM5	NM_138460	0.0130579	-1.66919
ARHGEF17	NM_014786	0.00273755	-1.66855
SHISA4	NM_198149	0.00626862	-1.66842
MAML3	NM_018717	0.00340813	-1.66764
THBS3	NM_007112	0.00582247	-1.66613
RAB26	NM_014353	0.0031502	-1.66561
GUSBL2	NR_003660	0.0015892	-1.66559
PABPC5	NM_080832	0.0301646	-1.66557
MET	NM_000245	0.00187885	-1.66534
APOL4	NM_030643	0.00585233	-1.66511
GSDML	NM_001042471	0.0163678	-1.66494
ZFYVE1	NM_021260	0.0020818	-1.66494
GALNT10	NM_198321	0.0182515	-1.66315
DDR1	NM_013993	0.00896533	-1.6622
AMBN	NM_016519	0.0410646	-1.6617
EFNB3	NM_001406	0.0416899	-1.6616
FOXN3	NM_001085471	0.00104203	-1.6611
IRF6	NM_006147	0.0162051	-1.66068
PLEKHG5	NM_198681	0.00252584	-1.66052
CLCN4	NM_001830	0.0151295	-1.65913
C20orf165	NM_080608	0.0403749	-1.65904
EYA4	NM_004100	0.0046143	-1.65791
SPEG	NM_005876	0.0437826	-1.656
NFIB	NM_005596	0.025003	-1.65486
TCEAL4	NM_024863	0.0150764	-1.65453
PARP12	NM_022750	0.0442722	-1.65368
ELF1	NM_172373	0.0209794	-1.65322
TMEM26	NM_178505	0.0384237	-1.65293
PCDHB7	NM_018940	0.0122935	-1.65282
PLEKHH2	NM_172069	0.0426523	-1.65252
PTHLH	NM_198965	0.0455233	-1.65015
MYOM1	NM_003803	0.00356896	-1.64967
MAOB	NM_000898	0.0358127	-1.64716
RCAN1	NM_004414	0.0145502	-1.64714
HAND2	NM_021973	0.00335835	-1.64702
SLC4A3	NM_201574	0.00363183	-1.64694
TSPAN6	NM_003270	0.00146487	-1.64637
CRISPLD2	NM_031476	0.0148818	-1.64319
STK36	NM_015690	0.00354302	-1.64232
PLD1	NM_002662	0.00901216	-1.64214
ISLR2	NM_020851	0.0157976	-1.64113
SCN7A	NM_002976	0.00582168	-1.6406
ZNF425	NM_001001661	0.0217687	-1.63964
TTC12	NM_017868	0.000477989	-1.63947
PCTK3	NM_002596	0.00688038	-1.63918
TMEM62	NM_024956	0.0463491	-1.63891
SERPING1	NM_000062	0.0300902	-1.63701
CHPT1	NM_020244	0.0100569	-1.63639
PPP2R5C	NM_002719	0.00794981	-1.63629
ARSD	NM_001669	0.0221537	-1.63463
TMEM25	NM_032780	0.00483843	-1.63431
TRPS1	NM_014112	0.00242526	-1.63279
TSHZ1	NM_005786	0.000383809	-1.63248
LTBP3	NM_021070	0.00240978	-1.63234
PSD3	NM_015310	0.0367746	-1.63213
XPNPEP2	NM_003399	0.00265148	-1.63167
WBP5	NM_016303	0.0348515	-1.62889
BCL9L	NM_182557	0.00656749	-1.62639
ADAMTS10	NM_030957	0.000423959	-1.62618
EMP3	NM_001425	0.0437857	-1.62527
PCDHB15	NM_018935	0.0214712	-1.62437
FNDC3B	NM_022763	0.0160446	-1.62322
SERINC2	NM_178865	0.0373823	-1.6232
ERRFI1	NM_018948	0.0103537	-1.62099
ZNF323	NM_145909	0.0252341	-1.62019
SLC25A27	NM_004277	0.00569434	-1.62007
PJA2	NM_014819	0.0232796	-1.61895
EDNRA	NM_001957	0.00860479	-1.61885
TMEM207	NM_207316	0.0284965	-1.61811
NCOR2	NM_006312	0.000751062	-1.61803
LMO7	NM_005358	0.0165226	-1.61726
CD97	NM_078481	0.0353415	-1.61403
BCOR	NM_001123385	0.00334571	-1.61386
CDH1	NM_004360	0.0167483	-1.61367
PCDHB9	NM_019119	0.0239863	-1.6119
H3F3B	NM_005324	0.0419933	-1.61128
FOXD1	NM_004472	0.00756471	-1.61111
TENC1	NM_170754	0.0287674	-1.60977
NPHP3	NM_153240	0.0184367	-1.60947
OAS1	NM_016816	0.015573	-1.60946
ARRDC3	NM_020801	0.0033722	-1.60827
MAN1C1	NM_020379	0.0053581	-1.60786
GSTT1	NM_000853	0.0359124	-1.60753
MR1	NM_001531	0.0196003	-1.60514
SULT1B1	NM_014465	0.0189152	-1.6049
RNF19A	NM_183419	0.000116327	-1.60478
DTX3L	NM_138287	0.0127532	-1.60448
DNMBP	NM_015221	0.0140042	-1.60199
C1QTNF6	NM_031910	0.000908626	-1.60156
DNAJB2	NM_006736	0.0211553	-1.60063
PGAP1	NM_024989	0.0197834	-1.59928
KLHDC2	NM_014315	0.0285568	-1.59838
CSGALNACT1	NM_018371	0.00779104	-1.59765
TPD52L1	NM_001003395	0.0291378	-1.59756
PTGER4	NM_000958	0.00514442	-1.59613
GSTK1	NM_015917	0.00612102	-1.59605
TOM1L2	NM_001082968	0.00108714	-1.59586
TMEM16K	NM_018075	0.0371413	-1.59532
HOXD10	NM_002148	0.00146972	-1.5947
DGKA	NM_201444	0.00225115	-1.59468
LDB1	NM_001113407	0.00160727	-1.59464
STIM2	NM_020860	0.0103948	-1.59286
TPCN1	NM_017901	0.00810407	-1.59236
NKD1	NM_033119	0.000796443	-1.59229
LDOC1	NM_012317	0.00451303	-1.59225
TRIM62	NM_018207	0.0062993	-1.59218
MERTK	NM_006343	0.0305645	-1.59118
CPS1	NM_001122633	0.0141478	-1.58938
ZADH2	NM_175907	0.000132817	-1.58912
MDH1B	NM_001039845	0.0366089	-1.58888
AFF1	NM_005935	0.0119968	-1.58888
MYO1C	NM_001080779	0.00381027	-1.58677
EPB41L1	NM_012156	0.00974668	-1.58523
NDRG1	NM_006096	0.016159	-1.58422
RAB5B	NM_002868	0.0186272	-1.58371
SLC44A5	NM_152697	0.0190086	-1.5835
SIM1	NM_005068	0.0200599	-1.58303
CAPN5	NM_004055	0.000679522	-1.58236
ZNF226	NM_001032372	0.0213733	-1.58227
OBSL1	NM_015311	0.0135826	-1.58137
DOK4	NM_018110	0.0107871	-1.58071
VEGFC	NM_005429	0.0249331	-1.58034
INPP1	NM_002194	0.0270876	-1.57995
OS9	NM_006812	0.00190185	-1.57949
FLJ10357	NM_018071	0.00252008	-1.57899
NUMA1	NM_006185	0.0197447	-1.57879
RNASEL	NM_021133	0.00889625	-1.57813
TDO2	NM_005651	0.0279614	-1.5762
MPZL3	NM_198275	0.0108465	-1.575
CERCAM	NM_016174	0.00510379	-1.57495
DDAH1	NM_012137	0.0176416	-1.57421
COMMD6	NM_203497	0.0276468	-1.57393
HERC3	NM_014606	0.00585926	-1.57223
NFATC4	NM_004554	0.0171519	-1.57107
PBX1	NM_002585	0.000746245	-1.57096
PIGZ	NM_025163	0.00022288	-1.5707
PLD2	NM_002663	0.00602853	-1.56999
TMEM66	NM_016127	0.00198186	-1.56953
SAMD11	NM_152486	0.0490594	-1.56903
BBS1	NM_024649	0.00232292	-1.56871
MPDZ	NM_003829	0.017924	-1.56838
MSRB2	NM_012228	0.00712575	-1.56837
CPT1B	NM_152247	0.000650005	-1.56815
GPR98	NM_032119	0.019074	-1.56791
C16orf7	NM_004913	0.0320903	-1.5676
CRTC3	NM_022769	0.00189726	-1.56759
KIAA0913	NM_015037	0.000433785	-1.56732
ALDH9A1	NM_000696	0.0143423	-1.56654
CTTNBP2	NM_033427	0.00682651	-1.566
LMBR1L	NM_018113	0.000100414	-1.56394
GNPTG	NM_032520	0.00762267	-1.56152
PICALM	NM_007166	0.00122402	-1.56115
TRIM32	NM_012210	0.0177612	-1.56092
EXOC7	NM_001013839	0.00272599	-1.56054
LGALS3BP	NM_005567	0.0144403	-1.55999
WIPI1	NM_017983	0.0439459	-1.55948
MMP14	NM_004995	0.00187841	-1.55885
ACCS	NM_032592	3.55e-05	-1.55872
THRA	NM_003250	0.00483747	-1.55834
CCPG1	NM_004748	0.0310255	-1.5582
HSPA2	NM_021979	0.00386723	-1.55749
NEO1	NM_002499	0.00492532	-1.55734
TIPARP	NM_015508	0.0149866	-1.55642
IQWD1	NM_018442	0.0178407	-1.55608
TTLL6	NM_173623	0.00703561	-1.55582
FBXL20	NM_032875	8.83e-05	-1.55559
ORMDL3	NM_139280	0.0116658	-1.55531
NLGN3	NM_018977	0.0170257	-1.55509
ZNF192	NM_006298	0.00480715	-1.55499
MEGF9	NM_001080497	0.0015689	-1.55482
MAP3K12	NM_006301	0.00677002	-1.55383
CLK4	NM_020666	0.0478424	-1.5537
DNAJC18	NM_152686	0.0261503	-1.55332
CLU	NM_001831	0.0153592	-1.55314
VPS41	NM_014396	0.0176434	-1.55296
CA11	NM_001217	0.020058	-1.55185
ZBTB34	NM_001099270	0.0212906	-1.55182
MRC2	NM_006039	0.00273146	-1.55162
PPARA	NM_005036	0.0105005	-1.5511
ALDH6A1	NM_005589	0.0216891	-1.55061
CCNL2	NM_001039577	0.00341121	-1.55048
KANK2	NM_015493	0.00662455	-1.55026
TMBIM1	NM_022152	0.0251436	-1.54922
C15orf33	NM_152647	0.0180878	-1.54704
DEFB126	NM_030931	0.0250996	-1.54621
LASP1	NM_006148	0.00130215	-1.54482
AHDC1	NM_001029882	0.000322838	-1.54462
TSPAN9	NM_006675	0.0190236	-1.54411
BTBD7	NM_001002860	0.019235	-1.54395
NR2F1	NM_005654	0.0379611	-1.5405
HR	NM_005144	0.039833	-1.53945
MVP	NM_017458	0.0166755	-1.53936
ARHGAP1	NM_004308	0.0114232	-1.53853
AMT	NM_000481	0.00159434	-1.53848
PROS1	NM_000313	0.0149802	-1.53823
TCF4	NM_001083962	0.0358266	-1.53741
PDE11A	NM_001077197	0.0134348	-1.53652
MAP3K7IP3	NM_152787	0.0290964	-1.53606
C14orf4	NM_024496	0.00377021	-1.53491
KANK4	NM_181712	0.0162456	-1.5348
CYB5D2	NM_144611	0.0211041	-1.53305
CERK	NM_022766	0.0165525	-1.53171
SP110	NM_080424	0.0217027	-1.53134
COL4A5	NM_000495	0.0321528	-1.53089
IGBP1	NM_001551	0.0216397	-1.53081
CAPN3	NM_212464	0.0067366	-1.53062
ZNF395	NM_018660	0.004423	-1.53
PCOLCE	NM_002593	0.00175662	-1.52902
KIAA1217	NM_019590	0.0297374	-1.52794
VPS39	NM_015289	0.0107789	-1.52779
CD63	NM_001780	0.00180648	-1.52743
LOXL1	NM_005576	0.00454961	-1.52736
TSPYL5	NM_033512	0.0035805	-1.52725
NRN1	NM_016588	0.00811243	-1.52564
GPC4	NM_001448	0.0416497	-1.52563
RBM5	NM_005778	0.00297298	-1.52413
NAALADL2	NM_207015	0.0171268	-1.52407
MAGED2	NM_014599	0.00566734	-1.52406
HEXA	NM_000520	0.00152488	-1.52369
WDR22	NM_003861	0.00306831	-1.52368
ANKRD22	NM_144590	0.0290483	-1.52319
EBF4	NM_001110514	0.0486376	-1.52283
NFAT5	NM_138714	0.0296467	-1.52221
ACVR1	NM_001105	0.0297123	-1.52132
CD36	NM_001001548	0.0014491	-1.52091
SATB2	NM_015265	0.017565	-1.51942
C14orf159	NM_001102366	0.0135744	-1.51925
TRADD	NM_003789	0.00349585	-1.51826
PAG1	NM_018440	0.00547558	-1.51801
SH3BGRL	NM_003022	0.0178867	-1.51713
TMEM38A	NM_024074	0.0409331	-1.51522
KCNMB4	NM_014505	0.0186455	-1.51514
IDUA	NM_000203	0.0338531	-1.51238
SERINC3	NM_006811	0.0086517	-1.5117
CIRBP	NR_023312	0.00157322	-1.51101
MAP1LC3A	NM_032514	0.011253	-1.51096
C10orf58	NM_032333	0.00878063	-1.51066
ZBTB4	NM_020899	0.000786742	-1.51063
SLC2A5	NM_003039	0.00825443	-1.51061
CAPN1	NM_005186	0.0148586	-1.51028
USP30	NM_032663	0.0456221	-1.50966
LGALS1	NM_002305	0.0445612	-1.50959
MEF2D	NM_005920	0.0218004	-1.5095
DBX2	NM_001004329	0.0488028	-1.50897
SEC62	NM_003262	0.00197945	-1.50896
MFHAS1	NM_004225	0.0252444	-1.50892
FLCN	NM_144997	0.00132221	-1.50863
FN1	NM_212482	0.0117919	-1.5085
SPARC	NM_003118	0.0363622	-1.50795
PDK4	NM_002612	0.0216746	-1.50732
WDR31	NM_001012361	0.0200844	-1.50682
CYP2D7P1	NR_002570	0.0205997	-1.50486
ZFP106	NM_022473	0.0343363	-1.50444
TBC1D13	NM_018201	0.00054401	-1.50419
SERTAD3	NM_013368	0.000129818	-1.50407
REG3A	NM_138938	0.013473	-1.50406
SLC16A2	NM_006517	0.00921234	-1.50398
MIZF	NM_015517	0.00380448	-1.50363
ZMAT1	NM_001011657	0.045782	-1.50301
EFHB	NM_144715	0.00340959	-1.50276
ABL1	NM_007313	0.00309243	-1.50232
CDKN1A	NM_078467	0.0131421	-1.50176
PRDM8	NM_020226	0.0225087	-1.50155
TNFAIP3	NM_006290	0.0274708	-1.5015
SCARB2	NM_005506	0.0336528	-1.50096
TCF7L1	NM_031283	0.0231979	-1.50047
PLD3	NM_012268	0.0145475	-1.50035
TRIOBP	NM_001039141	0.0134037	-1.49952
GAL3ST4	NM_024637	0.00414491	-1.49825
TSGA10	NM_182911	0.0375881	-1.49751
RASSF8	NM_007211	0.0033896	-1.49747
HLA-E	NM_005516	0.00544886	-1.49719
RBKS	NM_022128	0.0235425	-1.4962
ATP6V0D1	NM_004691	0.000369027	-1.49514
CDKN1B	NM_004064	0.0170484	-1.49513
PSEN1	NM_000021	0.00549272	-1.49486
TSC1	NM_000368	0.000681456	-1.49429
HIVEP1	NM_002114	0.0310917	-1.49391
NPFF	NM_003717	0.00353903	-1.49369
MBD5	NM_018328	0.00758022	-1.49366
EML3	NM_153265	0.00201941	-1.49328
FBXO25	NM_183421	0.0478109	-1.49286
MCAM	NM_006500	0.0088265	-1.4927
CCS	NM_005125	0.0272389	-1.49197
RARA	NM_000964	0.00870084	-1.49191
MXD1	NM_002357	0.0392351	-1.49152
OAZ2	NM_002537	0.00127788	-1.49151
MAP3K8	NM_005204	0.0231213	-1.49074
CHRNB1	NM_000747	0.00691251	-1.49062
ALDH2	NM_000690	0.00295713	-1.49058
BCO2	NM_031938	0.048925	-1.49009
C1orf85	NM_144580	0.0111944	-1.49009
RHOB	NM_004040	0.0297848	-1.48909
OSBPL2	NM_144498	0.0016227	-1.48812
PRKAR1A	NM_212472	0.00440703	-1.48719
ST6GALNAC2	NM_006456	0.027972	-1.48633
TSPAN9	NM_006675	0.00919659	-1.48452
ITGAV	NM_002210	0.005363	-1.48445
CLCN3	NM_173872	0.0476575	-1.48431
LCAT	NM_000229	0.00815318	-1.48376
VPS11	NM_021729	0.0113402	-1.48376
SCUBE3	NM_152753	0.030137	-1.48305
CLSTN3	NM_014718	0.0053521	-1.48265
ERBB2	NM_001005862	0.00311079	-1.48223
KIAA0182	NM_014615	0.00113339	-1.48183
MLL5	NM_182931	0.0122529	-1.47997
PLXNA3	NM_017514	0.00107104	-1.47965
TBR1	NM_006593	0.00640562	-1.47963
MICALCL	NM_032867	0.0327372	-1.47915
CASC1	NM_001082972	0.0450575	-1.47758
DISC1	NM_018662	0.0216371	-1.47698
NMT2	NM_004808	0.0382361	-1.47637
ZFX	NM_003410	0.00415452	-1.47614
HERPUD2	NM_022373	0.0204742	-1.47585
SEPT9	NM_006640	0.0324828	-1.47485
TIRAP	NM_001039661	0.00437836	-1.47267
SERPINB6	NM_004568	0.00362129	-1.47181
RAB22A	NM_020673	0.00796912	-1.47141
HERC6	NM_017912	0.049311	-1.46977
PPP2R3A	NM_002718	0.00752358	-1.46832
VGLL4	NM_014667	0.0465762	-1.46796
KLHL28	NM_017658	0.00418625	-1.46779
TTC23	NM_001040655	0.00503851	-1.46666
MSRA	NM_012331	0.0454438	-1.46505
ZER1	NM_006336	0.00436478	-1.46485
LOC285908	NM_181722	0.00146998	-1.46459
C10orf30	NM_152751	0.00520523	-1.46326
CAT	NM_001752	0.0021736	-1.46283
SLITRK1	NM_052910	0.0329798	-1.46209
RP11-35N6.1	NM_207299	0.0273742	-1.46105
NAB2	NM_005967	0.0411759	-1.46068
APPL2	NM_018171	0.00835291	-1.45976
FAM110B	NM_147189	0.0168395	-1.45965
NCOA1	NM_147223	0.0202651	-1.45962
LTBP4	NM_001042544	0.00688347	-1.45935
TOM1	NM_005488	0.0142527	-1.45902
MXD4	NM_006454	0.0180757	-1.45858
NTF4	NM_006179	0.0219197	-1.45801
TCEA2	NM_198723	0.00195015	-1.45654
CACHD1	NM_020925	0.0256559	-1.45632
KIAA0355	NM_014686	0.00976821	-1.45625
ZFHX3	NM_006885	0.000317967	-1.45528
APBB3	NM_133174	0.0397913	-1.4547
RARG	NM_000966	0.00279479	-1.45404
GEM	NM_005261	0.0311185	-1.4535
SLC26A4	NM_000441	0.0136592	-1.45332
PITX2	NM_153426	0.0255684	-1.45308
ACCN4	NM_018674	0.0376793	-1.45203
ANK3	NM_020987	0.0415913	-1.4518
WDR26	NM_025160	0.0139465	-1.45136
KIAA1033	NM_015275	0.0267923	-1.4509
TWSG1	NM_020648	0.000127591	-1.45056
IRF9	NM_006084	0.00346849	-1.44958
POU4F1	NM_006237	0.0199232	-1.44889
ARFIP1	NM_001025595	0.0185215	-1.44844
PLCD1	NM_006225	0.0157432	-1.4477
MGC13379	NM_016499	0.00108174	-1.44683
MAGED1	NM_001005333	0.00247122	-1.44672
SGPL1	NM_003901	0.0177929	-1.44649
NOTCH2	NM_024408	0.00340499	-1.44572
BCL2L11	NM_138621	0.0240779	-1.44555
ABI3BP	NM_015429	0.011119	-1.44554
THSD4	NM_024817	0.0290792	-1.44546
DLG5	NM_004747	0.00238483	-1.4453
ARHGEF3	NM_019555	0.0398569	-1.44483
ARMC2	NM_032131	0.0248859	-1.44481
SRPX	NM_006307	0.0130248	-1.44459
OGDHL	NM_018245	0.0447612	-1.44454
SLC25A18	NM_031481	0.0480284	-1.44435
STIM1	NM_003156	0.00191436	-1.44423
TOB1	NM_005749	0.0117015	-1.44337
ERCC6	NM_000124	0.0254342	-1.44301
FBXL3	NM_012158	0.0458767	-1.44276
TRIM21	NM_003141	0.0474194	-1.44235
MOV10L1	NM_018995	0.0272521	-1.4419
CPLX4	NM_181654	0.0216466	-1.44167
FLJ41603	NM_001001669	0.0333817	-1.44102
CTSA	NM_000308	0.00256842	-1.44099
HOXC6	NM_004503	0.0185969	-1.44033
ZBTB43	NM_014007	0.0204794	-1.43977
PLAG1	NM_002655	0.00340006	-1.43943
ERMAP	NM_001017922	0.0441806	-1.43937
SLC22A23	NM_015482	0.0224417	-1.43821
CPXM1	NM_019609	0.0156173	-1.43795
PARD3	NM_019619	0.0292397	-1.43752
FRMD4A	NM_018027	0.00134812	-1.43659
BMP5	NM_021073	0.0305367	-1.43641
GDPD3	NM_024307	0.00723311	-1.43592
RRAGC	NM_022157	0.018692	-1.43565
KIAA0430	NM_014647	0.0145353	-1.43534
PARP6	NM_020214	0.0034626	-1.43508
TMEM9B	NM_020644	0.00554167	-1.43471
CCDC149	NM_173463	0.0191999	-1.43418
ROGDI	NM_024589	0.010754	-1.4338
PIGA	NM_002641	0.0171995	-1.43258
NFIX	NM_002501	0.00179961	-1.43257
NKAIN3	NM_173688	0.0402922	-1.43254
ANKRD10	NM_017664	0.00172545	-1.43247
MARCKS	NM_002356	0.0416635	-1.43204
BHLHB9	NM_030639	0.0497785	-1.43202
NCSTN	NM_015331	0.0272585	-1.43192
AUH	NM_001698	0.0233423	-1.4317
TMC1	NM_138691	0.0117849	-1.43127
ZNF396	NM_145756	0.017382	-1.43058
ASPH	NM_004318	0.0116546	-1.42937
SEZ6L2	NM_012410	0.0270859	-1.42934
TSPYL2	NM_022117	0.0182555	-1.42933
DUSP16	NM_030640	0.0112678	-1.42889
TTC30A	NM_152275	0.0470679	-1.42889
MARCH8	NM_001002265	0.0497449	-1.42871
TCTN1	NM_001082538	0.00457494	-1.42799
SPTAN1	NM_003127	0.00577358	-1.42739
BLCAP	NM_006698	0.0151667	-1.42688
SFRS6	NM_006275	0.0152062	-1.42627
PACS1	NM_018026	0.0030834	-1.42566
GM2A	NM_000405	0.0315732	-1.42557
ABCA4	NM_000350	0.0309421	-1.42551
CTSB	NM_147780	0.0260472	-1.42529
SOCS6	NM_004232	0.00211671	-1.4251
SLC38A7	NM_018231	0.00225583	-1.42353
MFSD1	NM_022736	0.0203657	-1.42335
PARD3B	NM_152526	0.00254382	-1.42267
IFIT1	NM_001548	0.0428117	-1.42265
PARD6G	NM_032510	0.017951	-1.42241
FLRT1	NM_013280	0.0293551	-1.42225
VPS13B	NM_017890	0.0365275	-1.42153
APOLD1	NM_030817	0.00322032	-1.4213
ARL2BP	NM_012106	0.0436927	-1.42105
JUP	NM_002230	0.0142178	-1.42035
MB	NM_203377	0.0312703	-1.42021
NFKBIA	NM_020529	0.00958007	-1.41966
HMGCL	NM_000191	0.0232177	-1.41914
SHC1	NM_003029	0.0207887	-1.41905
SALL4	NM_020436	0.0307641	-1.41887
PSCD3	NM_004227	0.0349417	-1.41805
CTNNB1	NM_001904	0.0168856	-1.41725
HHAT	NM_018194	0.0160543	-1.41657
TPRG1L	NM_182752	0.0125837	-1.41616
NISCH	NM_007184	0.000481578	-1.41571
ST5	NM_005418	0.0154085	-1.41554
ACBD4	NM_024722	0.0219688	-1.41531
ECH1	NM_001398	0.0218069	-1.41526
CD248	NM_020404	0.0174804	-1.41482
NEDD4L	NM_015277	0.0106621	-1.41468
AMACR	NM_014324	0.044021	-1.41362
UBL3	NM_007106	0.0466679	-1.4129
LOC100137047-PLA2G4B	NR_015346	0.00857926	-1.41245
IVD	NM_002225	0.0221137	-1.41219
DCP1B	NM_152640	0.0284372	-1.41178
MFGE8	NM_005928	0.0214549	-1.41156
GGT7	NM_178026	0.029709	-1.41099
RUFY3	NM_001037442	0.0300284	-1.41005
ACP2	NM_001610	0.00842944	-1.40963
KLC4	NM_201523	0.00900181	-1.40793
COL14A1	NM_021110	0.0450135	-1.40693
TM9SF1	NM_006405	0.00782762	-1.40645
DYRK1B	NM_004714	0.0490348	-1.40618
ZFYVE26	NM_015346	0.0040766	-1.40529
F8	NM_000132	0.0228008	-1.40477
FRS2	NM_006654	0.0346752	-1.40459
CCDC102A	NM_033212	0.0191946	-1.40413
GEFT	NM_001111270	0.00251635	-1.404
RAB11B	NM_004218	0.0181925	-1.40395
CRIP1	NM_001311	0.035683	-1.40382
PEX11A	NM_003847	0.0143907	-1.40373
CPEB3	NM_014912	0.00182725	-1.4026
SPIN3	NM_001010862	0.00168193	-1.40218
GLIS2	NM_032575	0.0358504	-1.40212
PTPN3	NM_002829	0.0388333	-1.40163
MPG	NM_002434	0.0032319	-1.40146
CDC14B	NM_001077181	0.0130359	-1.40101
TP73	NM_005427	0.0132499	-1.40051
SCP2	NM_002979	0.0356074	-1.40038
NTN2L	NM_006181	0.0269691	-1.39996
DCUN1D3	NM_173475	0.018679	-1.39972
CUL7	NM_014780	0.0070011	-1.39801
DYX1C1	NM_130810	0.001719	-1.3979
IER5	NM_016545	0.0190699	-1.39767
DHRS1	NM_138452	0.0193366	-1.39742
SNTB2	NM_006750	0.00357228	-1.39689
SMCR8	NM_144775	0.0277843	-1.39576
TAPBP	NM_172208	0.0233058	-1.3953
UBXD1	NM_025241	0.00428501	-1.39517
CLUL1	NM_014410	0.0240541	-1.39416
FLJ13236	NM_024902	0.015885	-1.39379
STOM	NM_004099	0.000492173	-1.3933
GUCY1A3	NM_000856	0.0282132	-1.39325
RAB3D	NM_004283	0.0133314	-1.39243
PPP1R3C	NM_005398	0.0289115	-1.39202
NBR2	NR_003108	0.0118479	-1.39199
SMAD2	NM_005901	0.0216093	-1.39178
GPR176	NM_007223	0.049264	-1.3916
PRR16	NM_016644	0.03436	-1.39142
CHPF	NM_024536	0.0287757	-1.39132
INPPL1	NM_001567	0.00246594	-1.39013
KCNH2	NM_000238	0.0211801	-1.38927
HDAC7	NM_015401	0.00869188	-1.38901
TDRD7	NM_014290	0.0107851	-1.38841
PIK3IP1	NM_052880	0.0352093	-1.38832
POLL	NM_013274	0.00127621	-1.38826
ABHD2	NM_007011	0.0495531	-1.3874
ZNF652	NM_014897	0.0465687	-1.38727
TUG1	NR_002323	0.0436017	-1.38678
MAPK12	NM_002969	0.0207406	-1.38661
AGER	NM_001136	0.00204166	-1.3866
MAGEF1	NM_022149	0.0178757	-1.38549
MFAP2	NM_002403	0.0262761	-1.38502
RHOBTB2	NM_015178	0.0308693	-1.38413
NCAM1	NM_181351	0.00548005	-1.38353
FAM118A	NM_001104595	0.00287209	-1.38345
PSAP	NM_002778	0.00182189	-1.38315
SHB	NM_003028	0.00780835	-1.38246
BBS2	NM_031885	0.0127762	-1.3822
IGSF2	NM_004258	0.0207887	-1.3821
SLC22A17	NM_016609	0.00289535	-1.38197
COL4A3BP	NM_005713	0.0357429	-1.3819
PKNOX2	NM_022062	0.000308278	-1.38112
C20orf108	NM_080821	0.0143382	-1.38103
AP1G2	NM_080545	0.0118511	-1.38088
JARID1B	NM_006618	0.0209198	-1.38068
PRICKLE1	NM_153026	0.0238313	-1.38066
NPR2	NM_003995	0.0181422	-1.3794
LENG8	NM_052925	0.0123122	-1.37924
PAK3	NM_002578	0.0205624	-1.37834
SLC22A4	NM_003059	0.00311919	-1.37823
ABHD4	NM_022060	0.00212085	-1.37786
FLJ11286	NM_018381	0.0161946	-1.37649
ANKRD13A	NM_033121	0.0169442	-1.37629
ADC	NM_052998	0.00162264	-1.37626
ADARB1	NM_001033049	0.000854908	-1.37513
ZNF548	NM_152909	0.0253534	-1.37503
DNASE1L1	NM_001009932	0.00142637	-1.37478
WDR66	NM_144668	0.00312599	-1.37433
EDEM1	NM_014674	0.012389	-1.37407
KLF5	NM_001730	0.0181846	-1.37392
ATP1B2	NM_001678	0.00860718	-1.37388
NPTN	NM_012428	0.00506231	-1.37339
STX16	NM_001001433	0.0379509	-1.37265
TRPC4AP	NM_015638	0.0118968	-1.37207
PPP1R3B	NM_024607	0.0447249	-1.37166
ARHGAP20	NM_020809	0.0112833	-1.3708
GPR107	NM_020960	0.0323398	-1.37073
ARFGEF1	NM_006421	0.0482342	-1.36992
SEC23A	NM_006364	0.0329928	-1.36991
CCNL2	NM_001039577	0.0211964	-1.36953
HTR7	NM_019859	0.0366405	-1.36928
GPR108	NM_001080452	0.0260841	-1.369
MTMR3	NM_021090	0.00747659	-1.36886
FLJ44968	NM_198537	0.0488082	-1.36793
LMX1B	NM_002316	0.00256119	-1.36757
UBP1	NM_014517	0.0156021	-1.36657
KIF26B	NM_018012	0.0486716	-1.3665
SETD4	NM_017438	0.00767502	-1.3664
HYI	NM_031207	0.0109503	-1.36621
ELP2	NM_018255	0.0345691	-1.36588
STARD10	NM_006645	0.0212459	-1.36536
EFCAB6	NM_022785	0.00313002	-1.36523
SEMA4B	NM_020210	0.0428549	-1.36512
GAA	NM_000152	0.00925113	-1.36476
SNX21	NM_033421	0.0143356	-1.36448
SLC27A1	NM_198580	0.0456567	-1.36448
ZNF580	NM_016202	0.0039715	-1.36408
SERTAD2	NM_014755	0.0442591	-1.364
TCF25	NM_014972	0.00740575	-1.36382
ACTA2	NM_001613	0.00517395	-1.36327
TOX4	NM_014828	0.00177271	-1.36261
TSC2	NM_000548	0.00266968	-1.36244
ABCA12	NM_173076	0.00536807	-1.36218
TNRC6B	NM_001024843	0.0028464	-1.36208
SLC24A1	NM_004727	0.00288116	-1.36198
C14orf101	NM_017799	0.0112741	-1.36159
RRAGA	NM_006570	0.034338	-1.36078
UNC50	NM_014044	0.0241941	-1.35945
HDAC9	NM_178423	0.00962295	-1.35928
MPHOSPH8	NM_017520	0.0453665	-1.35909
PCNXL2	NM_014801	0.0270557	-1.35836
PDGFRA	NM_006206	0.0474307	-1.35656
ZNF174	NM_003450	0.0252531	-1.35511
NOTCH3	NM_000435	0.00860664	-1.35507
BIRC2	NM_001166	0.0474551	-1.35497
DAB2IP	NM_032552	0.00667084	-1.35482
CLCN7	NM_001287	0.00407071	-1.35458
CSNK1D	NM_139062	0.0273986	-1.35436
RCOR2	NM_173587	0.0310962	-1.35313
EPHB3	NM_004443	0.0166214	-1.35309
HIVEP2	NM_006734	0.0181493	-1.3508
TEAD3	NM_003214	0.0125801	-1.34905
RGAG1	NM_020769	0.00942799	-1.34851
ATP6AP2	NM_005765	0.0215507	-1.34848
ASB7	NM_198243	0.0187174	-1.34763
RAB40B	NM_006822	0.00631885	-1.34752
CYP3A5	NM_000777	0.0160941	-1.34742
GOLSYN	NM_001099744	0.0319395	-1.34716
CFI	NM_000204	0.0372219	-1.3455
C15orf27	NM_152335	0.0233364	-1.34525
HEXIM1	NM_006460	0.0376508	-1.34481
PLXNB1	NM_002673	0.014667	-1.34478
RNF38	NM_194328	0.014904	-1.34441
LOC338799	NR_002809	0.0477912	-1.34425
POMT1	NM_007171	0.00228254	-1.34408
DSP	NM_004415	0.0486621	-1.34283
FAM13A1	NM_001015045	0.00876396	-1.34243
ACOX1	NM_004035	0.00363899	-1.34209
LRRC27	NM_030626	0.0378101	-1.34192
PTK2B	NM_173174	0.00731781	-1.34174
ZNF516	NM_014643	0.00178616	-1.34169
NFE2L1	NM_003204	1.18e-05	-1.34156
PACS2	NM_001100913	0.0309598	-1.34154
SLC2A11	NM_030807	0.0185021	-1.33996
PLEKHG2	NM_022835	0.00270777	-1.33918
KIAA0892	NM_015329	0.0098043	-1.33864
ALS2CR12	NM_139163	0.0451195	-1.33772
RBCK1	NM_031229	0.0111805	-1.33712
ANXA1	NM_000700	0.0406815	-1.33694
MKL1	NM_020831	0.00400736	-1.33661
GPR173	NM_018969	0.00719842	-1.33578
WDR93	NM_020212	0.0230067	-1.33439
CASP9	NM_001229	0.0230924	-1.33361
PDLIM5	NM_006457	0.0330114	-1.33298
BST2	NM_004335	0.0286675	-1.33262
TOLLIP	NM_019009	0.00479348	-1.33146
CUEDC1	NM_017949	0.0408975	-1.33141
VPS4B	NM_004869	0.014771	-1.33031
ARRDC1	NM_152285	0.0111438	-1.32974
C8orf79	NM_001099677	0.0143052	-1.32864
GATAD1	NM_021167	0.00193278	-1.32853
ARSB	NM_000046	0.0384901	-1.3276
VAMP1	NM_199245	0.00309621	-1.32732
RTKN	NM_033046	0.0248782	-1.32618
TTBK2	NM_173500	0.0070201	-1.32615
CHD6	NM_032221	0.0445414	-1.32589
ACADVL	NM_000018	0.0054671	-1.32585
NQO1	NM_000903	0.018871	-1.32585
WWTR1	NM_015472	0.0372538	-1.32579
ZNF217	NM_006526	0.0348174	-1.32563
ATF7	NM_006856	0.000806057	-1.3254
PTPRO	NM_030667	0.030681	-1.32388
DDX26B	NM_182540	0.045122	-1.32386
ACTN1	NM_001102	0.00698842	-1.32357
SETBP1	NM_015559	0.00814216	-1.32343
SHROOM2	NM_001649	0.0372103	-1.3228
PRKG2	NM_006259	0.033183	-1.32264
SMCR7	NM_148886	0.0367497	-1.32256
HSD11B1L	NM_198706	0.0222507	-1.32138
CD99L2	NM_031462	0.00742005	-1.32128
ETV6	NM_001987	0.0238004	-1.32125
KIAA0368	NM_001080398	0.0022282	-1.32112
MDK	NM_001012334	0.0208799	-1.3211
TPM2	NM_003289	0.0328264	-1.32081
TOB2	NM_016272	0.0329829	-1.32071
PCDHB16	NM_020957	0.0309831	-1.31949
ZNF148	NM_021964	0.0268302	-1.31933
ATN1	NM_001007026	0.00657119	-1.31876
TRO	NM_001039705	0.0404237	-1.31809
DPYSL3	NM_001387	0.0381811	-1.31744
DNASE2	NM_001375	0.0399233	-1.31663
SRGAP3	NM_014850	0.015979	-1.31619
PLXNC1	NM_005761	0.0458727	-1.31613
C10orf140	NM_207371	0.0215916	-1.31608
TP53INP2	NM_021202	0.0106499	-1.3158
SLC4A8	NM_001039960	0.00486581	-1.31559
SHISA2	NM_001007538	0.0385906	-1.31547
FANK1	NM_145235	0.000622959	-1.31507
TMEM150	NM_001031738	0.0424327	-1.3147
ANKRD44	NM_153697	0.00828861	-1.31461
SMAD3	NM_005902	0.00360402	-1.31302
HEMK1	NM_016173	0.000514405	-1.31292
SPAG16	NM_024532	0.037145	-1.3127
TMUB2	NM_177441	0.0139802	-1.31226
PLS3	NM_005032	0.0119901	-1.31221
EVI1	NM_001105078	0.0478488	-1.31145
DNAJC4	NM_005528	0.0125104	-1.31104
CAPN9	NM_006615	0.00422479	-1.30807
RAB27B	NM_004163	0.0488438	-1.3078
FAM80B	NM_020734	0.0132692	-1.30747
TRAFD1	NM_006700	0.0219603	-1.30719
CACNB3	NM_000725	0.00461831	-1.30717
CIC	NM_015125	0.00104008	-1.30717
SLC38A2	NM_018976	0.0366379	-1.30714
TSC22D2	NM_014779	0.00506187	-1.30566
NDP	NM_000266	0.00667492	-1.3053
RELA	NM_021975	0.010391	-1.30395
CPT1C	NM_152359	0.0310921	-1.30381
FLJ37464	NM_173815	0.00955684	-1.30359
TM7SF2	NM_003273	0.0393977	-1.30303
RTDR1	NM_014433	0.0164274	-1.30273
WDR42A	NM_015726	0.0275228	-1.30272
LAT	NM_014387	0.0286805	-1.30189
NR3C1	NM_000176	0.00781406	-1.3018
ABHD7	NM_173567	0.0102875	-1.30162
THAP8	NM_152658	0.00462059	-1.30139
C8orf42	NM_175075	0.0221611	-1.30096
NCOA3	NM_181659	0.041715	-1.30092
ABCD1	NM_000033	0.0287616	-1.30079
COL24A1	NM_152890	0.0245757	-1.29931
CYP26B1	NM_019885	0.0341649	-1.2991
VAMP5	NM_006634	0.045024	-1.2984
MGRN1	NM_015246	0.00156826	-1.29832
UBE2Z	NM_023079	0.0396333	-1.29769
CDAN1	NM_138477	0.00314159	-1.29748
CORO1B	NM_020441	0.00668709	-1.29739
PLXDC2	NM_032812	0.0268614	-1.29739
CNTNAP1	NM_003632	0.0212736	-1.29711
ZNF600	NM_198457	0.0446722	-1.29682
SH3PXD2A	NM_014631	0.0469223	-1.29651
KLHL3	NM_017415	0.0189796	-1.29607
RFFL	NM_057178	0.020422	-1.29563
CSAD	NM_015989	0.027131	-1.29512
TP53BP2	NM_005426	0.00665467	-1.29498
HS1BP3	NM_022460	0.0265651	-1.29405
RAI16	NM_022749	0.0240893	-1.29384
YIPF6	NM_173834	0.00163925	-1.29225
C20orf132	NM_152503	0.0137301	-1.2919
ACTR10	NM_018477	0.000508076	-1.29136
FBXL7	NM_012304	0.0498024	-1.28987
KIAA0195	NM_014738	0.0037593	-1.28977
DIP2B	NM_173602	0.00452338	-1.28969
MED12	NM_005120	0.00804117	-1.28967
CENTD2	NM_139181	0.00593274	-1.2894
HOXC13	NM_017410	0.000252868	-1.28876
SQSTM1	NM_003900	0.0123238	-1.2884
EXOC3	NM_007277	0.000924362	-1.28827
MAPK8IP3	NM_015133	0.00918365	-1.28819
MTHFR	NM_005957	0.027277	-1.28818
BTBD9	NM_052893	0.04779	-1.28784
CRAT	NM_000755	0.0109328	-1.28754
RBM4B	NM_031492	0.00755847	-1.28718
TUBA4A	NM_006000	0.045883	-1.28685
ST7	NM_021908	0.0342304	-1.28637
S100A13	NM_001024210	0.0215236	-1.28624
ZNF624	NM_020787	0.0384908	-1.28615
DSE	NM_013352	0.0355991	-1.28613
ZRSR2	NM_005089	0.042528	-1.28594
PTP4A2	NM_080391	0.0304647	-1.28593
CREB3	NM_006368	0.0259661	-1.28549
BSDC1	NM_018045	0.018596	-1.28535
SEC14L1	NM_003003	0.00634995	-1.2841
CAPNS1	NM_001749	0.0135453	-1.28387
GIT2	NM_057169	0.0243698	-1.28378
CEP68	NM_015147	0.0287943	-1.28342
ARHGEF2	NM_004723	0.0317408	-1.28341
TIMP2	NM_003255	0.0184735	-1.28335
PLEKHM1	NM_014798	0.000900214	-1.28234
CTTNBP2NL	NM_018704	0.0462043	-1.28209
VEGFB	NM_003377	0.0267939	-1.28118
PRDM2	NM_012231	0.0440839	-1.28118
ZNF19	NM_006961	0.0273784	-1.28107
STK3	NM_006281	0.0443449	-1.28071
TAS2R50	NM_176890	0.043426	-1.27959
DDEFL1	NM_017707	0.0270391	-1.27954
TNFSF12-TNFSF13	NM_172089	0.0339281	-1.27906
CHMP1B	NM_020412	0.00852733	-1.27833
TRIP4	NM_016213	0.0209055	-1.27829
ASAM	NM_024769	0.0111343	-1.27826
KIAA1609	NM_020947	0.00447075	-1.27761
SLC44A2	NM_020428	0.0271218	-1.27655
ZNF428	NM_182498	0.0201725	-1.27557
MED15	NM_001003891	0.0206396	-1.2749
STX4	NM_004604	0.0243318	-1.27434
CCDC6	NM_005436	0.0443368	-1.2736
TEP1	NM_007110	0.00280517	-1.27345
GBA2	NM_020944	0.00117859	-1.27311
FLOT2	NM_004475	0.0406206	-1.27212
POMT2	NM_013382	0.025452	-1.27171
GPRASP1	NM_014710	0.0282037	-1.27129
TRIM13	NM_213590	0.0424982	-1.27047
SNX19	NM_014758	0.0260657	-1.27037
COL19A1	NM_001858	0.0226555	-1.26982
MLXIP	NM_014938	0.0247198	-1.26912
RAB36	NM_004914	0.0496092	-1.26791
FKBP10	NM_021939	0.0217059	-1.26767
KEAP1	NM_203500	0.0473352	-1.26703
AFTPH	NM_203437	0.00963797	-1.26697
STX5	NM_003164	0.0193513	-1.26654
DIP2B	NM_173602	0.00414861	-1.26629
ZNF193	NM_006299	0.00131402	-1.26626
MYADM	NM_001020818	0.0358091	-1.26609
STAT6	NM_003153	0.0134406	-1.26456
HDAC6	NM_006044	0.00852588	-1.26447
SMARCE1	NM_003079	0.0115141	-1.26381
PGPEP1	NM_017712	0.040533	-1.26341
PRMT2	NM_206962	0.00018818	-1.26232
CLTCL1	NM_007098	0.0178221	-1.26211
SOX17	NM_022454	0.0242741	-1.26122
KIF13B	NM_015254	0.00370389	-1.26061
FLJ36031	NM_175884	0.0230731	-1.2605
ADAM32	NM_145004	0.028742	-1.25967
KIAA0174	NM_014761	0.0239567	-1.25946
PPP1R3D	NM_006242	0.00146461	-1.2594
CDK3	NM_001258	0.0078651	-1.25769
PTPRS	NM_002850	0.0154583	-1.25752
ADAMTS6	NM_197941	0.0331819	-1.25726
CCDC69	NM_015621	0.0222785	-1.25683
SLC37A1	NM_018964	0.00896071	-1.25621
ZSWIM2	NM_182521	0.0207254	-1.2549
RNF185	NM_152267	0.0469852	-1.25385
HPS1	NM_000195	0.0262001	-1.25262
LAMP1	NM_005561	0.0499947	-1.25206
PML	NM_033240	0.0218033	-1.25149
RNF41	NM_194358	0.0070236	-1.25146
CREBBP	NM_004380	0.0213279	-1.25087
CBFB	NM_001755	0.0330405	-1.2503
LARP5	NM_015155	0.0267042	-1.25022
NADSYN1	NM_018161	0.00255427	-1.24998
ATP6AP1	NM_001183	0.00641233	-1.24933
SCD5	NM_001037582	0.0119116	-1.24898
FURIN	NM_002569	0.0356448	-1.24894
LL22NC03-5H6.5	NM_017931	0.0215171	-1.24829
GRINA	NM_000837	0.0109994	-1.24693
TNRC6C	NM_018996	0.00820852	-1.24647
CDC42EP4	NM_012121	0.0036333	-1.24585
C10orf76	NM_024541	0.0158718	-1.24535
FAM40A	NM_033088	0.0418695	-1.24344
GRK4	NM_182982	0.0029713	-1.24342
ZNF687	NM_020832	0.0246128	-1.24282
PHC2	NM_198040	0.0161027	-1.24109
NEU1	NM_000434	0.033028	-1.24071
ZNF460	NM_006635	0.0433778	-1.24056
PEPD	NM_000285	0.00738874	-1.24054
TIMP1	NM_003254	0.0396473	-1.24041
ERC1	NM_178037	0.0350144	-1.24028
FBXO44	NM_001014765	0.00942174	-1.23973
FBXW4	NM_022039	0.0134216	-1.23914
AMFR	NM_001144	0.0105642	-1.23784
CDKL1	NM_004196	0.00185561	-1.23752
JARID2	NM_004973	0.0201741	-1.23737
ZNF132	NM_003433	0.0400495	-1.23731
BECN1	NM_003766	0.00543771	-1.23638
GFER	NM_005262	0.049766	-1.23612
WDR6	NM_018031	0.0326033	-1.23608
ADD1	NM_176801	0.0107125	-1.23436
CRNKL1	NM_016652	0.039607	-1.23349
ERGIC3	NM_198398	0.0196784	-1.23266
BACE1	NM_012104	0.00350497	-1.23236
DPH1	NM_001383	0.0144558	-1.23232
SETDB1	NM_012432	0.0430416	-1.23231
LRRK1	NM_024652	0.00591911	-1.23009
RSBN1L	NM_198467	0.0220414	-1.22991
ZNF462	NM_021224	0.0327917	-1.22954
ATP9B	NM_198531	0.00960756	-1.22884
TSPYL1	NM_003309	0.0229372	-1.22873
TSC22D1	NM_183422	0.0227964	-1.22789
C6orf142	NM_138569	0.0193346	-1.2261
KIAA1267	NM_015443	0.0275302	-1.22584
ZNF333	NM_032433	0.0201452	-1.22577
BCL9	NM_004326	0.0208819	-1.22513
USP20	NM_006676	0.0113965	-1.22506
RP11-16L6.1	NM_203451	0.0185566	-1.22475
C9orf3	NM_032823	0.0183028	-1.22425
FGF2	NM_002006	0.0462748	-1.22361
ADCY9	NM_001116	0.0486935	-1.22316
ARHGEF11	NM_198236	0.00730572	-1.22314
KLF13	NM_015995	0.0349644	-1.22168
KIAA1632	NM_020964	0.0165345	-1.21951
ZNF70	NM_021916	0.0121918	-1.21887
PDPK1	NM_002613	0.0311604	-1.21871
FTO	NM_001080432	0.0146539	-1.21769
ZNF740	NM_001004304	0.0357251	-1.21683
FARP1	NM_005766	0.0367979	-1.21672
ZNRF1	NM_032268	0.0278582	-1.21631
TMCO3	NM_017905	0.0254151	-1.2159
PIP4K2C	NM_024779	0.0311494	-1.21538
SIN3B	NM_015260	0.0418419	-1.2152
BCL2L1	NM_138578	0.0037715	-1.21482
PHF12	NM_001033561	0.0109168	-1.2142
CIZ1	NM_012127	0.0256108	-1.21416
PIP4K2B	NM_003559	0.0122388	-1.2126
MOBKL2A	NM_130807	0.0326571	-1.21186
DALRD3	NM_001009996	0.00315444	-1.21161
NDST2	NM_003635	0.0129114	-1.21115
CDIPT	NM_006319	0.0447658	-1.20962
IFT140	NM_014714	0.00825478	-1.20926
ABR	NM_021962	0.0272675	-1.20827
CTSD	NM_001909	0.000714448	-1.20712
NIBP	NM_031466	0.0486115	-1.20628
C11orf49	NM_001003676	0.00384256	-1.2039
ASXL1	NM_015338	0.0196884	-1.20337
CTDSP1	NM_021198	0.0242646	-1.20256
IKBKB	NM_001556	0.0120534	-1.20249
SCPEP1	NM_021626	0.0417776	-1.20072
ALDH5A1	NM_170740	0.0265134	-1.20058
ANXA11	NM_145869	0.0296681	-1.19991
SDF2	NM_006923	0.0373228	-1.19856
GJA3	NM_021954	0.0371982	-1.19763
CD151	NM_004357	0.0373365	-1.19751
AGPAT3	NM_020132	0.0262963	-1.19716
SPAG7	NM_004890	0.00760524	-1.19677
ERCC2	NM_000400	0.0234735	-1.19492
RNF19B	NM_153341	0.0274218	-1.19462
HIP1R	NM_003959	0.0217219	-1.19441
CTNS	NM_004937	0.0288919	-1.19101
RXRB	NM_021976	0.0374338	-1.19045
USF2	NM_003367	0.0486713	-1.18815
IGFBP2	NM_000597	0.00696703	-1.18754
VPS18	NM_020857	0.0357923	-1.18712
RBM9	NM_001082578	0.00481564	-1.18505
DCBLD2	NM_080927	0.0205199	-1.18481
TAOK2	NM_016151	0.0413297	-1.18326
SUPT6H	NM_003170	0.0235811	-1.18233
TTYH2	NM_032646	0.0369958	-1.18221
WIPI2	NM_015610	0.0345296	-1.17958
ZNF490	NM_020714	0.0482236	-1.17876
VCPIP1	NM_025054	0.0318991	-1.17833
MAN2A2	NM_006122	0.0305925	-1.17814
C20orf11	NM_017896	0.0360853	-1.17794
FGFR1	NM_023110	0.0147347	-1.17773
ARL5B	NM_178815	0.00975421	-1.17511
M-RIP	NM_201274	0.045627	-1.17231
ACSF3	NM_174917	0.0435983	-1.17148
PDPN	NM_006474	0.0093312	-1.17127
RRBP1	NM_001042576	0.0418601	-1.16988
BMPR1B	NM_001203	0.0238339	-1.16885
CCDC97	NM_052848	0.0160868	-1.16883
PTGFRN	NM_020440	0.019429	-1.16719
SPG7	NM_003119	0.0174737	-1.16304
GOLM1	NM_016548	0.0424362	-1.15973
LPXN	NM_004811	0.0390729	-1.15881
N-PAC	NM_032569	0.0175278	-1.15823
INTS3	NM_023015	0.0393048	-1.15669
ABCA2	NM_001606	0.0420449	-1.1557
ITFG3	NM_032039	0.0452453	-1.14446
JARID1C	NM_004187	0.024875	-1.1426
CNDP2	NM_018235	0.0365902	-1.14253
CTTN	NM_005231	0.00988889	-1.14147
ZNF785	NM_152458	0.0195274	-1.14003
PTGIS	NM_000961	0.0281541	-1.13498
CCDC32	NM_001080791	0.00995786	-1.13274
CCRK	NM_178432	0.00708316	-1.13203
SMO	NM_005631	0.0365056	-1.13198
VRK3	NM_016440	0.0470602	-1.12998
MBD1	NM_015846	0.0171561	-1.12673
PRPF40B	NM_012272	0.0486231	-1.11397
IQCH	NM_001031715	0.0466174	-1.1123
GBF1	NM_004193	0.00199271	-1.10724
ATG9A	NM_001077198	0.0225729	-1.10326
PGS1	NM_024419	0.0366569	-1.10263
SP2	NM_003110	0.0467447	-1.10249
MEX3C	NM_016626	0.0308965	-1.10239
SUSD1	NM_022486	0.0301946	-1.09737
AP3D1	NM_003938	0.0355704	-1.09646
FGD1	NM_004463	0.0486959	-1.0938
NCDN	NM_014284	0.041828	-1.09279
POLR2A	NM_000937	0.0288424	-1.09027
TLN1	NM_006289	0.0338827	-1.08335
ENTPD7	NM_020354	0.0476812	-1.07229
PQLC1	NM_025078	0.03977	1.05951
SLC15A4	NM_145648	0.0199994	1.09149
TMED2	NM_006815	0.0167681	1.10865
SLC25A17	NM_006358	0.0461231	1.1172
MTCP1	NM_014221	0.031987	1.11891
ENTPD1	NM_001776	0.0240437	1.12245
STARD7	NM_020151	0.024999	1.12455
CELSR2	NM_001408	0.0046473	1.12782
TEX2	NM_018469	0.0393604	1.1297
RCC2	NM_018715	0.0428079	1.13143
BICD2	NM_001003800	0.0354438	1.13612
SAP130	NM_024545	0.00652291	1.13703
C11orf17	NM_182901	0.0157999	1.13815
BAT2	NM_080686	0.0205375	1.14148
DUSP3	NM_004090	0.0287026	1.1423
PHKG2	NM_000294	0.0422391	1.14322
MRPL32	NM_031903	0.046583	1.14594
PORCN	NM_022825	0.0489312	1.14639
KLHDC3	NM_057161	0.0398589	1.14911
CCDC12	NM_144716	0.0401194	1.15839
IDH3B	NM_174856	0.0372941	1.15872
L3MBTL2	NM_031488	0.0408955	1.15997
PPP1R8	NM_138558	0.0443684	1.16017
EIF2B2	NM_014239	0.0395217	1.16124
NRF1	NM_005011	0.00347698	1.16133
HAGH	NM_001040427	0.0369231	1.17034
RNF8	NM_003958	0.0275065	1.1734
B3GALT6	NM_080605	0.0338552	1.17424
BTBD12	NM_032444	0.0379535	1.17582
RPS6KB2	NM_003952	0.00215498	1.17687
UBXD5	NM_183008	0.0489236	1.17704
SHANK1	NM_016148	0.0401179	1.17711
APOA1BP	NM_144772	0.0425198	1.17977
MLX	NM_170607	0.0120999	1.1798
COX18	NM_173827	0.0154597	1.18135
TUFM	NM_003321	0.035186	1.18508
DFFA	NM_213566	0.00931561	1.18511
POLG	NM_002693	0.0300072	1.18551
SH3BP4	NM_014521	0.0143588	1.18631
PAK4	NM_001014831	0.0304952	1.18868
UQCR	NM_006830	0.0319984	1.19027
DAGLB	NM_139179	0.0390424	1.19075
SIPA1	NM_153253	0.0149879	1.19147
NEIL2	NM_145043	0.0293325	1.19184
KIF3C	NM_002254	0.0159118	1.19301
ANP32C	NM_012403	0.0426527	1.19345
ACTR1A	NM_005736	0.0392273	1.19381
TOR3A	NM_022371	0.0144322	1.19445
KPTN	NM_007059	0.018941	1.1949
YWHAG	NM_012479	0.0106841	1.19492
FLJ22167	NM_001077419	0.0222211	1.19498
MCOLN1	NM_020533	0.0292025	1.19613
NDUFV1	NM_007103	0.00740487	1.19622
ENO1	NM_001428	0.00813163	1.19677
ALG12	NM_024105	0.0162224	1.19687
SH3GLB2	NM_020145	0.0437639	1.20176
CEP250	NM_007186	0.0410153	1.20205
MRPS11	NM_022839	0.0298944	1.20313
SLC25A25	NM_001006641	0.0157759	1.2036
CSDA	NM_003651	0.0130051	1.20483
EDARADD	NM_080738	0.0335302	1.20689
SELS	NM_203472	0.0448865	1.20692
POR	NM_000941	0.0206128	1.20804
MAT2A	NM_005911	0.044127	1.20828
PTBP1	NM_002819	0.0257967	1.21095
ADAM15	NM_207196	0.0298497	1.21258
SCAP	NM_012235	0.0140139	1.21271
NAP1L4	NM_005969	0.0396686	1.21305
GPR4	NM_005282	0.0325447	1.21491
DPM2	NM_003863	0.0400747	1.21595
CENTG2	NM_001037131	0.0251111	1.21708
PGD	NM_002631	0.0268212	1.21753
SPECC1	NM_001033553	0.0306547	1.21772
TIMM17B	NM_005834	0.0403966	1.21921
SLC7A7	NM_003982	0.0469688	1.21954
PFKFB4	NM_004567	0.0118503	1.22044
INHBC	NM_005538	0.00395889	1.22053
KRI1	NM_023008	0.0100471	1.22112
CAMK1	NM_003656	0.0105104	1.22179
DHX34	NM_014681	0.044259	1.22188
ASTE1	NM_014065	0.0245543	1.22228
AP4M1	NM_004722	0.0100124	1.22254
KLHL21	NM_014851	0.0141129	1.22302
ZNF672	NM_024836	0.0304353	1.22347
PPTC7	NM_139283	0.0283025	1.22429
IRS2	NM_003749	0.0378839	1.22494
PSMD2	NM_002808	0.0273007	1.22579
HSD11B2	NM_000196	0.0437268	1.22989
FAM82C	NM_018145	0.008692	1.23033
TRMT12	NM_017956	0.0272199	1.23095
TOMM34	NM_006809	0.0194478	1.23235
ERAL1	NM_005702	0.0420743	1.23247
MBD3	NM_003926	0.041366	1.2329
HCFC1	NM_005334	0.0152228	1.23393
ETS2	NM_005239	0.0152343	1.23524
MRPL46	NM_022163	0.0282015	1.2359
PRPF4	NM_004697	0.0433106	1.23604
RAG1AP1	NM_018845	0.0490865	1.23621
RNF34	NM_194271	0.0189135	1.23622
HIRA	NM_003325	0.0456213	1.23805
TIAM1	NM_003253	0.0498967	1.23854
C9orf114	NM_016390	0.0480497	1.23901
NR2F2	NM_021005	0.00262409	1.23945
TRIM27	NM_006510	0.00256563	1.24051
PISD	NM_014338	0.0205358	1.24052
DPYSL2	NM_001386	0.0259526	1.24101
EIF3K	NM_013234	0.0261199	1.2416
ALG14	NM_144988	0.0450592	1.24173
CAGE1	NM_205864	0.0342675	1.2423
HLA-DMA	NM_006120	0.00338534	1.24257
DDX54	NM_001111322	0.0410519	1.24275
RAD54L2	NM_015106	0.0119278	1.24319
ATP2B4	NM_001001396	0.0249151	1.24354
MED9	NM_018019	0.00102615	1.24359
PDAP1	NM_014891	0.0087204	1.24399
LRRFIP1	NM_004735	0.0424051	1.24421
SYNGR2	NM_004710	0.0231815	1.24448
DUS1L	NM_022156	0.0295122	1.24468
BAZ1B	NM_032408	0.0478611	1.24537
SF3A3	NM_006802	0.0074175	1.24617
TCEB1	NM_005648	0.00600961	1.24666
SMPD2	NM_003080	0.0203789	1.24731
RDH11	NM_016026	0.0114212	1.24733
ABCF1	NM_001025091	0.0260217	1.2477
PPT1	NM_000310	0.0376194	1.24804
C11orf80	NM_024650	0.0446056	1.2481
STIP1	NM_006819	0.0148008	1.24812
DUS3L	NM_020175	0.0454914	1.24863
UBAC1	NM_016172	0.0411161	1.24897
SNAP25	NM_003081	0.0479799	1.24908
ILKAP	NM_030768	0.0296432	1.24944
UHMK1	NM_175866	0.0453648	1.24978
MRPL4	NM_146388	0.0261684	1.2498
ADCY3	NM_004036	0.0208262	1.24982
DAPK2	NM_014326	0.0284451	1.25016
GADD45A	NM_001924	0.0446396	1.25051
JTB	NM_006694	0.00944623	1.2507
GPR172A	NM_024531	0.0408539	1.25073
MAPK6	NM_002748	0.0383141	1.25117
PRMT1	NM_198319	0.0457943	1.25137
PPP1R15B	NM_032833	0.0316971	1.25214
HSPBAP1	NM_024610	0.0406143	1.2528
WARS	NM_004184	0.0356039	1.25305
USP36	NM_025090	0.0446452	1.25332
LAP3	NM_015907	0.0115871	1.25417
ST3GAL4	NM_006278	0.0254027	1.25536
PANK4	NM_018216	0.0284976	1.25597
TBL3	NM_006453	0.0179961	1.25658
SFXN2	NM_178858	0.0242101	1.25662
FBF1	NM_001080542	0.0413881	1.25802
FKSG24	NM_032683	0.00630035	1.25855
MED20	NM_004275	0.015418	1.25865
RHBDD1	NM_032276	0.0291164	1.25872
PPAN	NM_020230	0.0458817	1.25899
FEZ1	NM_005103	0.0401874	1.2611
SLC16A1	NM_003051	0.0194079	1.26162
IFT122	NM_052985	0.0201434	1.26207
PSMD13	NM_002817	0.0416265	1.26268
ASB13	NM_024701	0.015804	1.26331
NHP2L1	NM_005008	0.0122675	1.26348
POLE4	NM_019896	0.0305754	1.26364
CDH7	NM_033646	0.00528272	1.26372
C19orf10	NM_019107	0.00592455	1.26426
DDX56	NM_019082	0.0189141	1.26453
BAG3	NM_004281	0.00617927	1.26517
DAP	NM_004394	0.0245014	1.26599
TP53I11	NM_001076787	0.02465	1.26615
KIAA0841	NM_015302	0.00413196	1.26697
RAB4B	NM_016154	0.0258087	1.26698
PREX1	NM_020820	0.0314034	1.26713
PIM2	NM_006875	0.0138726	1.26731
BOLA1	NM_016074	0.0438114	1.26742
LOC26010	NM_001100422	0.0261694	1.26813
ATRIP	NM_130384	0.0102742	1.26816
DLK2	NM_023932	0.00747162	1.26837
TRPM8	NM_024080	0.0270088	1.27031
UBE2L6	NM_004223	0.0190636	1.27059
GMEB1	NM_006582	0.0368389	1.27114
POP5	NM_015918	0.014381	1.27143
PSMC4	NM_006503	0.0163898	1.27169
PRKAR2A	NM_004157	0.0279484	1.27205
FAM57A	NM_024792	0.0124438	1.27235
PPA2	NM_176869	0.0305703	1.27287
SCNM1	NM_024041	0.048059	1.27308
SPTBN2	NM_006946	0.00915397	1.27447
AHSA1	NM_012111	0.0198624	1.27568
PTGES2	NM_025072	0.0255592	1.27584
SMG5	NM_015327	0.00978761	1.276
SPATA5L1	NM_024063	0.00828521	1.27759
HTRA2	NM_013247	0.0304215	1.27774
TUBB	NM_178014	0.0403212	1.27828
MRPL15	NM_014175	0.0342634	1.27836
DFFB	NM_004402	0.023705	1.27856
C2orf40	NM_032411	0.025607	1.27878
BUD31	NM_003910	0.0166828	1.28026
QTRT1	NM_031209	0.0395464	1.28053
GMDS	NM_001500	0.000363063	1.28092
C16orf57	NM_024598	0.0411864	1.28101
EIF2B5	NM_003907	0.0231916	1.28113
PSMA7	NM_002792	0.00118847	1.28156
TRIM9	NM_052978	0.046619	1.28187
RAD9A	NM_004584	0.0358251	1.28218
COX5B	NM_001862	0.0263904	1.28269
RP3-402G11.5	NM_031454	0.0181609	1.28347
TMED8	NM_213601	0.00438057	1.2841
SHPK	NM_013276	0.024509	1.28452
RASSF1	NM_007182	0.0268762	1.28625
PIN1	NM_006221	0.0419378	1.28643
TRAF2	NM_021138	0.0384149	1.2874
RPUSD2	NM_152260	0.00861842	1.28753
ARID3B	NM_006465	0.00929733	1.28764
SRF	NM_003131	0.0114106	1.28771
C1orf174	NM_207356	0.0365221	1.28788
NR1H3	NM_005693	0.0313383	1.28805
SCN2A	NM_021007	0.027982	1.28865
RAVER1	NM_133452	0.0238303	1.28963
MGC3207	NM_001031727	0.0353515	1.29017
AHCTF1	NM_015446	0.0224322	1.2905
TMEM110	NM_198563	0.0469049	1.2906
NME2	NM_001018137	0.0465453	1.29081
ZP3	NM_001110354	0.00202032	1.29153
KALRN	NM_007064	0.0350871	1.29161
TALDO1	NM_006755	0.0163516	1.29162
DHODH	NM_001361	0.0461607	1.29183
CAV1	NM_001753	0.0070311	1.29204
CHCHD3	NM_017812	0.0475175	1.29258
PDE1B	NM_000924	0.0303599	1.29271
TXNDC5	NM_022085	0.00471407	1.29311
COX8A	NM_004074	0.0458305	1.29438
TSR2	NM_058163	0.0122595	1.29489
PTPN18	NM_014369	0.047665	1.29602
C6orf108	NM_199184	0.0373728	1.29603
NT5DC2	NM_022908	0.0416734	1.29655
PPFIA3	NM_003660	0.0168833	1.29734
PA2G4	NM_006191	0.0215974	1.29771
EIF3B	NM_001037283	0.000470038	1.298
SCAMP3	NM_005698	0.00608655	1.29855
RBM38	NM_017495	0.0233524	1.29907
KBTBD6	NM_152903	0.0450009	1.29995
NUP62	NM_153719	0.0394914	1.30139
NQO2	NM_000904	0.00946226	1.3021
CABP7	NM_182527	0.0316491	1.30275
SSB	NM_003142	0.0279226	1.30324
HSPC159	NM_014181	0.0112732	1.30336
SCRIB	NM_182706	0.0334469	1.30353
SS18L2	NM_016305	0.0298958	1.30358
CAMKK2	NM_006549	0.00604932	1.30497
DDX49	NM_019070	0.0340977	1.30555
TSPAN7	NM_004615	0.00741615	1.30649
NDUFA7	NM_005001	0.0475789	1.30669
LRWD1	NM_152892	0.0178593	1.30734
IFNA7	NM_021057	0.00303631	1.30745
ACO2	NM_001098	0.0220403	1.30794
TMUB1	NM_031434	0.00126018	1.30905
BAX	NM_138764	0.0357708	1.30906
ARS2	NM_015908	0.000489886	1.3093
PRSS7	NM_002772	0.0165592	1.30951
TEX261	NM_144582	0.0445433	1.30971
HDGF	NM_004494	0.0210262	1.30996
NFATC2IP	NM_032815	0.0270987	1.31018
ENTPD6	NM_001247	0.0335565	1.31065
NANS	NM_018946	0.0111437	1.31158
ATP6V0E2	NM_145230	0.0377594	1.3122
C1QBP	NM_001212	0.010892	1.31225
LDHA	NM_005566	0.00155066	1.31236
SUMO3	NM_006936	0.0472794	1.31335
C1orf2	NM_006589	0.00297621	1.31337
DIRC2	NM_032839	0.0394035	1.31355
ZXDC	NM_025112	0.0154116	1.31367
PCNT	NM_006031	0.023911	1.31497
SLC16A13	NM_201566	0.0383757	1.31562
AP2S1	NM_004069	0.0245787	1.31567
HSD17B10	NM_004493	0.00735064	1.31589
C19orf61	NM_019108	0.00759838	1.31602
CLEC11A	NM_002975	0.0236464	1.3162
HSPB1	NM_001540	0.00609291	1.31655
RQCD1	NM_005444	0.0212349	1.31719
USP31	NM_020718	0.0311315	1.31794
BRD9	NM_023924	0.00846902	1.31794
ATP5I	NM_007100	0.0064605	1.31862
FICD	NM_007076	0.00893649	1.31868
ZNF331	NM_018555	0.041177	1.31871
ADPRHL2	NM_017825	0.0325691	1.32009
C14orf169	NM_024644	0.0343882	1.3202
EIF1AD	NM_032325	0.00561776	1.32067
RUSC1	NM_001105203	0.00915668	1.32129
TNFSF9	NM_003811	0.0280287	1.32142
MAD2L1BP	NM_001003690	0.00210345	1.3217
DCPS	NM_014026	0.021606	1.32182
TMEM206	NM_018252	0.0164762	1.32196
SNX8	NM_013321	0.0315168	1.322
POLS	NM_006999	0.0185649	1.32261
PSMB2	NM_002794	0.0205573	1.32356
PSMG3	NM_032302	0.026752	1.32361
ARPC5L	NM_030978	0.0124428	1.32376
IMMT	NM_006839	0.0202558	1.32378
AAAS	NM_015665	0.0479105	1.32485
SLC35C1	NM_018389	0.0177732	1.32485
CCDC90A	NM_001031713	0.00285546	1.32493
AKR1B1	NM_001628	0.00208913	1.32498
HSPA9	NM_004134	0.000268731	1.32498
SLC25A39	NM_016016	0.0458266	1.32539
POLR1A	NM_015425	0.027848	1.32677
KIAA0859	NM_015935	0.0321544	1.32735
RBM35A	NM_017697	0.0438047	1.32788
NIP7	NM_016101	0.00930984	1.32842
PXMP4	NM_007238	0.0430882	1.33075
APEX2	NM_014481	0.0314648	1.3309
NRM	NM_007243	0.00275523	1.33112
PRPS2	NM_001039091	0.0250791	1.3313
THOC6	NM_024339	0.0175767	1.33141
SLC25A37	NM_016612	0.0463031	1.33176
SOX1	NM_005986	0.0400328	1.332
MRPS18B	NM_014046	0.0294522	1.33358
HLF	NM_002126	0.0400607	1.33396
KIAA0664	NM_015229	0.028257	1.3341
RPUSD3	NM_173659	0.0285784	1.33418
NEK5	NM_199289	0.0473059	1.33476
LINGO1	NM_032808	0.0202777	1.33483
COTL1	NM_021149	0.0144115	1.33486
RCE1	NM_005133	0.000823928	1.3349
OGDH	NM_002541	0.00145882	1.33496
WHSC1	NM_133330	0.0128957	1.3359
NKX6-1	NM_006168	0.0434865	1.33595
GNA12	NM_007353	0.00695892	1.33633
APRT	NM_000485	0.0403679	1.33639
CACNA1A	NM_000068	0.0164022	1.33641
TCP1	NM_030752	0.00313574	1.33655
PBRM1	NM_018165	0.0453712	1.33657
ZDHHC18	NM_032283	0.0048277	1.33659
BRPF1	NM_001003694	0.0092703	1.33666
POGK	NM_017542	0.0466372	1.33668
DYNC1H1	NM_001376	0.0109601	1.33731
ZNF593	NM_015871	0.000323908	1.33734
GRM8	NM_000845	0.038107	1.33746
MN1	NM_002430	0.0250595	1.33861
BAK1	NM_001188	0.0165495	1.33953
ELAC2	NM_018127	0.00403517	1.33971
C15orf39	NM_015492	0.0152748	1.34014
SCARNA8	NR_003009	0.0177303	1.34038
SARS2	NM_017827	0.0111595	1.34043
SEC16B	NM_033127	0.0133236	1.34128
C20orf27	NM_001039140	0.0490692	1.34179
CASP7	NM_033338	0.0383444	1.34182
NHEDC2	NM_178833	0.0118955	1.34185
PARP1	NM_001618	0.0139031	1.34199
ABCB8	NM_007188	0.0285861	1.34221
FLAD1	NM_025207	0.0227517	1.34246
IMPDH2	NM_000884	0.0341654	1.34316
PNPLA3	NM_025225	0.0081702	1.34322
GNL3L	NM_019067	0.0133292	1.34377
LAS1L	NM_031206	0.0182973	1.344
SLC35A4	NM_080670	0.0115637	1.34436
NDUFA2	NM_002488	0.0295365	1.34482
CTSL2	NM_001333	0.002382	1.34488
MRPS5	NM_031902	1.62e-05	1.34501
BDH1	NM_203314	0.00280541	1.34671
DBF4B	NM_145663	0.0294551	1.34683
LPCAT1	NM_024830	0.000956968	1.34687
SMPD4	NM_017951	0.0236248	1.34691
ICMT	NM_012405	0.00835358	1.34699
MEA1	NM_014623	0.00417289	1.3472
TOMM40L	NM_032174	0.00633647	1.34754
TOP3A	NM_004618	0.0416415	1.34761
SLC23A2	NM_005116	0.0229967	1.34793
GTPBP4	NM_012341	0.010656	1.34834
FBXO10	NM_012166	0.0150128	1.34853
NCAPH2	NM_152299	0.0132883	1.34865
BID	NM_197966	0.0268491	1.34885
ANAPC11	NM_001002244	0.0291651	1.34912
TRAPPC4	NM_016146	0.0452712	1.34927
PHF5A	NM_032758	0.0383497	1.34944
WDR46	NM_005452	0.00796964	1.34951
VASH2	NM_024749	0.0317638	1.34951
CCT7	NM_006429	0.0228152	1.34972
NOL12	NM_024313	0.00362928	1.35074
THOP1	NM_003249	0.0245378	1.35142
POLR3D	NM_001722	0.00889614	1.35171
CNBP	NM_003418	0.0156554	1.35176
RECQL	NM_002907	0.0441706	1.35245
EFHD1	NM_025202	0.0494851	1.35278
BAT4	NM_033177	0.0118321	1.35282
CCDC75	NM_174931	0.0299327	1.35294
PSMC3	NM_002804	0.022294	1.35315
FTSJ1	NM_177439	0.0196489	1.35453
CACNB2	NM_201571	0.0304776	1.35541
CCDC95	NM_173618	0.0187998	1.35564
KARS	NM_005548	0.00890574	1.35583
CACNA1I	NM_021096	0.0159821	1.3559
SSRP1	NM_003146	0.0382753	1.35619
NDUFB9	NM_005005	0.0157141	1.35648
MMD	NM_012329	0.0202028	1.35663
TMEM147	NM_032635	0.0113902	1.35706
NUP160	NM_015231	0.0398114	1.35741
RPL35A	NM_000996	0.0290146	1.35795
PCSK2	NM_002594	0.03844	1.35807
ABHD6	NM_020676	0.0407774	1.35854
PREB	NM_013388	0.00116924	1.35973
CYP27C1	NM_001001665	0.0295612	1.35984
MAP4K2	NM_004579	0.0135982	1.36125
CA13	NM_198584	0.0290686	1.36138
ISOC1	NM_016048	0.00393862	1.36143
MYCN	NM_005378	0.0170394	1.36208
PKN3	NM_013355	0.00668723	1.36267
DOT1L	NM_032482	0.0368446	1.3628
POLR2H	NM_006232	0.0495909	1.363
SLC24A3	NM_020689	0.00860319	1.36326
C18orf8	NM_013326	0.017465	1.36329
KRTAP4-5	NM_033188	0.00295275	1.36349
SUCLG1	NM_003849	0.00331526	1.36361
ADRM1	NM_007002	0.0068072	1.36409
GUSB	NM_000181	0.0215842	1.36479
ADD2	NM_017488	0.00364508	1.36501
HMOX2	NM_002134	0.0070599	1.36536
ZNF326	NM_182976	0.0402699	1.36608
C6orf136	NM_001109938	0.00324673	1.36634
RPN1	NM_002950	0.0290827	1.36658
NCLN	NM_020170	0.0170094	1.36673
TKT	NM_001064	0.00864802	1.36739
ELOVL5	NM_021814	0.00199705	1.36751
NDE1	NM_017668	0.0398929	1.36795
HSPA1B	NM_005346	0.0103924	1.36819
GPR77	NM_018485	0.0391751	1.36829
BCL2L12	NM_138639	0.0401799	1.36963
DNMT3B	NM_006892	0.00897622	1.37026
ETF1	NM_004730	0.030077	1.37027
DDX18	NM_006773	0.0169548	1.3706
PIH1D1	NM_017916	0.039452	1.37085
OSTalpha	NM_152672	0.0112971	1.37105
RABEPK	NM_005833	0.000944256	1.37115
SENP3	NM_015670	0.0376875	1.37135
NPTXR	NM_014293	0.0169559	1.37156
CDC42SE2	NM_020240	0.00359328	1.37205
POLR1C	NM_203290	0.0104806	1.37205
FANCE	NM_021922	0.0222796	1.37275
NVL	NM_002533	0.029265	1.37362
SREBF2	NM_004599	0.0065188	1.37456
ANKRD39	NM_016466	0.0204772	1.37531
ELAVL1	NM_001419	0.0072845	1.37544
BCS1L	NM_004328	0.0271584	1.37602
RPL12	NM_000976	0.00959837	1.37609
PFDN6	NM_014260	0.00341892	1.37641
BCL7B	NM_001707	0.00601149	1.37724
SLC27A4	NM_005094	0.00795465	1.37801
DDEF2	NM_003887	0.00674776	1.37881
TRPM4	NM_017636	0.000869803	1.37897
GADL1	NM_207359	0.048589	1.37952
RNF126	NM_194460	0.00599205	1.37955
DPAGT1	NM_001382	0.0110714	1.37988
RPIA	NM_144563	0.01579	1.38067
MIF	NM_002415	0.0221473	1.38139
ABCB6	NM_005689	0.0147047	1.38154
NUP93	NM_014669	0.00768696	1.38231
ABCF2	NM_007189	0.00858334	1.38331
[truncated: 1,085 more rows]

## Sheet: EWS502 FLI1 vs Knockdown
Gene Symbol	RefSeq	p-value	Fold-Change
ACSM2B	NM_182617	0.0379216	-3.02989
HIST1H4L	NM_003546	0.00293182	-2.8179
TMSL8	NM_021992	0.0092453	-2.81457
LCE3D	NM_032563	0.0359941	-2.77754
LCE2D	NM_178430	0.0110063	-2.52571
CCKAR	NM_000730	0.00671391	-2.39855
RHOXF2	NM_032498	0.0276507	-2.30262
SERPINB7	NM_003784	0.0444174	-2.28344
OR1L1	NM_001005236	0.00248148	-2.09307
DPY19L2	NM_173812	0.0367432	-2.04732
OR5M1	NM_001004740	0.0108053	-2.02736
UTS2	NM_021995	0.0337245	-1.98595
PANX3	NM_052959	0.0167821	-1.93277
C20orf79	NM_178483	0.0129481	-1.91997
HIST1H3G	NM_003534	0.0218451	-1.84519
STC1	NM_003155	0.00319086	-1.821
IL3	NM_000588	0.0265072	-1.81306
DCX	NM_000555	0.0308103	-1.80785
HOXD12	NM_021193	0.00528739	-1.80376
OGN	NM_033014	0.0271589	-1.79165
RSPO3	NM_032784	0.00888212	-1.76484
LSM14B	NM_144703	0.0278968	-1.75181
EGR2	NM_000399	0.0361932	-1.74826
DNAJC9	NM_015190	0.00372749	-1.74761
NXPH2	NM_007226	0.0116654	-1.73726
IMPA2	NM_014214	0.0392759	-1.72945
CA14	NM_012113	0.00594634	-1.7266
VGLL3	NM_016206	0.00796537	-1.71378
KBTBD10	NM_006063	0.0124384	-1.70019
C3orf24	NM_173472	0.0316581	-1.69946
DEFB126	NM_030931	0.0137999	-1.66898
DBC1	NM_014618	0.0175595	-1.66759
EYA1	NM_000503	0.00901556	-1.66075
TEAD1	NM_021961	0.00433158	-1.65419
OSR2	NM_053001	0.0291655	-1.65409
MS4A8B	NM_031457	0.0362686	-1.64313
NDP	NM_000266	0.000443439	-1.63134
RND2	NM_005440	0.041907	-1.62756
NEFM	NM_005382	0.0010827	-1.62242
ANAPC11	NM_001002244	0.00477736	-1.61164
HIST1H2BO	NM_003527	0.0325049	-1.60926
UBE2C	NM_181802	0.00491238	-1.60517
UGT2B15	NM_001076	0.0229193	-1.59185
CDCA4	NM_017955	0.0272478	-1.58929
CD24	NM_013230	0.0345153	-1.58413
FAM19A2	NM_178539	0.0335706	-1.58326
CBS	NM_000071	0.0160482	-1.58004
OCA2	NM_000275	0.012538	-1.57734
NTF4	NM_006179	0.0108548	-1.57438
MPPED2	NM_001584	0.0197663	-1.57124
ACTG2	NM_001615	0.0174887	-1.55539
LRRN3	NM_001099660	0.0384594	-1.55329
UGT2B4	NM_021139	0.0251512	-1.55266
ADAMTSL1	NM_001040272	0.0077539	-1.55189
HPDL	NM_032756	0.033705	-1.54826
GMCL1L	NR_003281	0.049273	-1.54634
OR4E2	NM_001001912	0.0429299	-1.54455
FLRT3	NM_198391	0.00158733	-1.54432
ZNF503	NM_032772	0.0487364	-1.54178
EIF1AX	NM_001412	0.00426883	-1.53605
NPFF	NM_003717	0.00266941	-1.5343
IL12A	NM_000882	0.0159824	-1.53031
BMPER	NM_133468	0.0219399	-1.52461
C14orf24	NM_001079519	0.0302351	-1.52167
FAM19A1	NM_213609	0.0379463	-1.52105
GPX6	NM_182701	0.0126384	-1.51956
FAM84B	NM_174911	0.00566239	-1.51177
LCP1	NM_002298	0.0400389	-1.50718
SCD	NM_005063	0.00321008	-1.50701
CLDN1	NM_021101	0.0319505	-1.50677
MGC72080	NR_002822	0.000599089	-1.50493
DOC2B	NM_003585	0.0263651	-1.50188
CTSL2	NM_001333	0.000564767	-1.50138
ELOVL6	NM_024090	0.0138078	-1.49942
PRKG2	NM_006259	0.00830794	-1.49926
GPSN2	NM_138501	0.00692237	-1.49721
UCP2	NM_003355	0.0479026	-1.49507
ROGDI	NM_024589	0.00691962	-1.49467
KIAA1975	NM_133447	0.0490726	-1.49456
GPR173	NM_018969	0.00178285	-1.49226
E2F2	NM_004091	0.0232464	-1.48747
OIP5	NM_007280	0.0278352	-1.48594
CKB	NM_001823	0.0200968	-1.48528
DUPD1	NM_001003892	0.0340314	-1.48315
EME1	NM_152463	0.0252126	-1.47824
HYI	NM_031207	0.00435018	-1.4778
WNT5A	NM_003392	0.0274245	-1.47716
GNG4	NM_001098722	0.013681	-1.47595
NACA	NM_001113203	0.00685784	-1.47077
CFHR4	NM_006684	0.0276264	-1.4665
DKFZP564O0823	NM_015393	0.0479493	-1.46196
C9orf19	NM_022343	0.0161856	-1.45887
HIST1H4A	NM_003538	0.0426026	-1.45878
NAB2	NM_005967	0.041739	-1.45837
PTN	NM_002825	0.0309243	-1.45599
LOC348840	NR_003291	0.0434005	-1.45288
FAM83D	NM_030919	0.00482536	-1.4523
FAM3B	NM_058186	0.00401512	-1.45175
APLP1	NM_001024807	0.0287268	-1.45069
RABL2B	NM_001003789	0.0146947	-1.45038
PIGA	NM_002641	0.0154931	-1.44712
KLHL25	NM_022480	0.0141312	-1.44607
SFXN2	NM_178858	0.00361573	-1.44559
TLCD1	NM_138463	0.0456414	-1.44388
VTCN1	NM_024626	0.0366286	-1.44185
COIL	NM_004645	0.00511164	-1.44116
ELAC1	NM_018696	0.0480451	-1.43639
FHL2	NM_201555	0.0181841	-1.43426
KRT25	NM_181534	0.0266365	-1.433
PENK	NM_006211	0.0419559	-1.43132
OR11H6	NM_001004480	0.0219299	-1.43099
SLMO1	NM_006553	0.0454358	-1.42884
BHLHB5	NM_152414	0.0232948	-1.42753
LSS	NM_002340	0.0119589	-1.42505
DPH3	NM_206831	0.0334076	-1.42408
DSEL	NM_032160	0.0186939	-1.42292
ADAMTS6	NM_197941	0.00664531	-1.41926
WDR34	NM_052844	0.00576417	-1.41907
ZNF600	NM_198457	0.0158702	-1.4181
ARL3	NM_004311	0.0465878	-1.41511
GUCY1A3	NM_000856	0.024297	-1.41339
SLC26A10	NM_133489	0.0120494	-1.4127
OR10R2	NM_001004472	0.0222084	-1.41237
EGR1	NM_001964	0.00365001	-1.4113
MTCP1	NM_014221	0.000282923	-1.40922
DGAT2	NM_032564	0.0164607	-1.40744
MYOT	NM_006790	0.0159445	-1.40665
NSUN5	NM_018044	0.00400322	-1.40624
TTLL12	NM_015140	0.0472348	-1.40232
POP5	NM_015918	0.00358431	-1.40112
PMCH	NM_002674	0.0289326	-1.39775
NACAP1	NR_002182	0.0359574	-1.39755
FAM19A3	NM_001004440	0.040864	-1.39727
RUFY3	NM_001037442	0.0332415	-1.39592
SLC29A3	NM_018344	0.0336723	-1.39534
TMEM97	NM_014573	0.049661	-1.39276
NTRK3	NM_001007156	0.036392	-1.39169
APCDD1	NM_153000	0.00702859	-1.39146
LRAT	NM_004744	0.0088063	-1.39118
DVL2	NM_004422	0.0152169	-1.39092
SLC3A2	NM_001012661	0.00911393	-1.38859
CADPS2	NM_017954	0.0373645	-1.38775
PPP1R1A	NM_006741	0.0432858	-1.38645
PHKA2	NM_000292	0.0449525	-1.38348
ARX	NM_139058	0.038334	-1.37667
NT5DC2	NM_022908	0.0203684	-1.37637
GEFT	NM_001111270	0.003353	-1.37406
STRAP	NM_007178	0.0484577	-1.3735
TTC12	NM_017868	0.00357641	-1.37294
SLC6A9	NM_201649	0.0122434	-1.37215
SETD6	NM_024860	0.038943	-1.37208
SERTAD3	NM_013368	0.000444837	-1.37051
CDKN1B	NM_004064	0.0402424	-1.3703
SOX17	NM_022454	0.00756493	-1.36941
TMEM186	NM_015421	0.0378539	-1.36759
HIST1H2AG	NM_021064	0.0259457	-1.36759
ADRB3	NM_000025	0.0145244	-1.36655
PITX2	NM_153426	0.0469042	-1.36597
BMP6	NM_001718	0.0464362	-1.35956
ZNF414	NM_032370	0.0324193	-1.35763
BNIP3	NM_004052	0.0330437	-1.35668
SLC25A27	NM_004277	0.033854	-1.35278
TUBA1A	NM_006009	0.0417015	-1.35228
CENPM	NM_024053	0.028381	-1.35178
SCN7A	NM_002976	0.0380204	-1.35127
CBLN2	NM_182511	0.00157786	-1.34942
TSPYL2	NM_022117	0.0343408	-1.34838
PTPRM	NM_001105244	0.02175	-1.34804
TMEM38B	NM_018112	0.0269078	-1.34596
NRBP2	NM_178564	0.00968452	-1.342
EPR1	NR_002219	0.0205801	-1.3399
TAF15	NM_139215	0.00693221	-1.33951
PNPLA3	NM_025225	0.00850919	-1.33927
ICT1	NM_001545	0.0285138	-1.33856
SOX12	NM_006943	0.04443	-1.33731
RBM3	NM_006743	0.0493767	-1.33619
NKD1	NM_033119	0.00647557	-1.3354
PHGDH	NM_006623	0.0351808	-1.33406
PELI3	NM_145065	0.0284258	-1.33403
LRRC47	NM_020710	0.0161177	-1.3323
SLC47A1	NM_018242	0.0331394	-1.33145
TMEM54	NM_033504	0.0320609	-1.32915
DCLK2	NM_001040260	0.0441123	-1.3258
C21orf66	NM_016631	0.0233901	-1.32555
HDAC9	NM_178423	0.013991	-1.32183
NDUFAF1	NM_016013	0.032792	-1.32149
OPRS1	NM_005866	0.0469554	-1.32087
DYNLL2	NM_080677	0.0138532	-1.32021
OPN3	NM_014322	0.032387	-1.3186
CECR5	NM_033070	0.0391667	-1.31597
FKBP2	NM_004470	0.0200956	-1.31559
FLJ37464	NM_173815	0.00848459	-1.31401
ZNF286A	NM_020652	0.0138794	-1.31194
C9orf100	NM_032818	0.0429901	-1.31101
LMX1B	NM_002316	0.00486315	-1.30978
C10orf58	NM_032333	0.0415533	-1.30977
C22orf9	NM_001009880	0.0236445	-1.30965
NCAM1	NM_181351	0.0116869	-1.30921
ADCK1	NM_020421	0.0150649	-1.30829
ATP6V1E2	NM_080653	0.0467955	-1.30767
CUTC	NM_015960	0.0264899	-1.30468
TBX5	NM_181486	0.0320995	-1.30296
PPAN	NM_020230	0.0289592	-1.30276
FLJ90650	NM_173800	0.0477944	-1.30053
GSR	NM_000637	0.00410415	-1.29969
LOC400566	NM_001013672	0.0176491	-1.29915
STX2	NM_194356	0.027505	-1.29798
C8orf79	NM_001099677	0.0199602	-1.29696
HDHD1A	NM_012080	0.0397763	-1.29656
HOXD10	NM_002148	0.0170768	-1.29643
MPND	NM_032868	0.0260502	-1.29608
CRTC3	NM_022769	0.0184641	-1.2959
DUSP5P	NR_002834	0.0403154	-1.29574
KLC2	NM_022822	0.0279659	-1.29568
OTP	NM_032109	0.0314266	-1.29335
C20orf30	NM_001009924	0.0440456	-1.29325
STK3	NM_006281	0.0391316	-1.29323
DHODH	NM_001361	0.0456023	-1.2931
PIM2	NM_006875	0.0100954	-1.29297
PRPS2	NM_001039091	0.0363801	-1.29285
FUS	NM_004960	0.00601652	-1.29108
SPIN3	NM_001010862	0.0057063	-1.29078
FEM1A	NM_018708	0.0498826	-1.29028
SOCS6	NM_004232	0.00869596	-1.2894
YAP1	NM_006106	0.0180287	-1.28801
SLC25A22	NM_024698	0.0271803	-1.28723
PC	NM_001040716	0.0401442	-1.28651
C14orf169	NM_024644	0.0478209	-1.28539
C6orf182	NM_001083535	0.0297661	-1.28474
ZNF777	NM_015694	0.0419608	-1.28273
CDON	NM_016952	0.0456101	-1.28265
MUM1	NM_032853	0.00205807	-1.28258
DPM2	NM_003863	0.0172338	-1.28223
HOXC13	NM_017410	0.00028206	-1.28136
MCM7	NM_005916	0.0492426	-1.28104
DAK	NM_015533	0.0126252	-1.28087
NLN	NM_020726	0.0288973	-1.27839
PLAG1	NM_002655	0.0174308	-1.27573
PIP4K2C	NM_024779	0.0140659	-1.27467
GPR156	NM_153002	0.0318772	-1.27429
CDO1	NM_001801	0.0251975	-1.27242
SNAPC3	NM_001039697	0.0404135	-1.27153
DCI	NM_001919	0.0440275	-1.27141
FUZ	NM_025129	0.026265	-1.2706
HSPB8	NM_014365	0.00541885	-1.27043
THOC6	NM_024339	0.0338134	-1.26895
LRRC23	NM_201650	0.0280357	-1.26869
SH3RF2	NM_152550	0.0411974	-1.26733
GRAMD4	NM_015124	0.0330471	-1.26692
SMUG1	NM_014311	0.0434431	-1.26654
WWOX	NM_016373	0.0470522	-1.26643
MCTS1	NM_014060	0.0440912	-1.26486
FBXO10	NM_012166	0.0361188	-1.26364
SLC25A29	NM_001039355	0.0391363	-1.26334
CLN6	NM_017882	0.0239433	-1.26273
ICMT	NM_012405	0.021841	-1.26116
AARS	NM_001605	0.0476914	-1.26083
GRK4	NM_182982	0.00226556	-1.26076
PARD6B	NM_032521	0.0280353	-1.26054
EID2	NM_153232	0.0461043	-1.25849
MTMR4	NM_004687	0.048012	-1.25832
EFNB1	NM_004429	0.0427312	-1.25789
FOLH1	NM_004476	0.0377985	-1.25771
TIMM17B	NM_005834	0.0251756	-1.25571
SMAD1	NM_005900	0.0183263	-1.25493
LRMP	NM_006152	0.0490027	-1.25421
CLCN2	NM_004366	0.00985813	-1.25353
THAP8	NM_152658	0.00872996	-1.25351
FBXW4	NM_022039	0.0110791	-1.2526
ALKBH5	NM_017758	0.00345304	-1.25105
ABHD4	NM_022060	0.00968888	-1.25104
CPSF4	NM_006693	0.0451821	-1.25069
ZBTB3	NM_024784	0.0148252	-1.25011
ABCA12	NM_173076	0.0196335	-1.24946
TMEM66	NM_016127	0.0333077	-1.24896
PFKFB4	NM_004567	0.00765062	-1.24886
TBCD	NM_005993	0.0226098	-1.24822
DCK	NM_000788	0.0140159	-1.24684
TRADD	NM_003789	0.0408155	-1.24658
IRS2	NM_003749	0.0290794	-1.2453
TMEM147	NM_032635	0.0381328	-1.24467
MAPK7	NM_139033	0.0367802	-1.24448
ZNF154	NM_001085384	0.0452521	-1.24417
TCF3	NM_003200	0.031252	-1.24323
TSR2	NM_058163	0.0234867	-1.24267
NTHL1	NM_002528	0.0192573	-1.24232
PCDH10	NM_032961	0.0290838	-1.2423
RAB40B	NM_006822	0.021941	-1.24207
DPH1	NM_001383	0.0132472	-1.23825
ZIC2	NM_007129	0.0393502	-1.23719
ZNF230	NM_006300	0.0233093	-1.23405
ERCC2	NM_000400	0.0128669	-1.23265
PAQR4	NM_152341	0.0205171	-1.23242
G6PD	NM_000402	0.042868	-1.2319
VEGFB	NM_003377	0.0483335	-1.23068
RUVBL2	NM_006666	0.0305714	-1.23038
FBXW8	NM_153348	0.0195918	-1.23023
ARFIP2	NM_012402	0.000569709	-1.23021
UBE2CBP	NM_198920	0.00158828	-1.22917
DDX28	NM_018380	0.0484463	-1.2288
PKN3	NM_013355	0.0319291	-1.22745
C14orf101	NM_017799	0.0491793	-1.22618
ZNF193	NM_006299	0.0026157	-1.22432
PHB	NM_002634	0.0221178	-1.22271
ACTA2	NM_001613	0.0277326	-1.22267
RABEPK	NM_005833	0.00687523	-1.22227
PHPT1	NM_014172	0.0498034	-1.22017
RP2	NM_006915	0.0456872	-1.21904
TWSG1	NM_020648	0.00239615	-1.21901
CCDC12	NM_144716	0.0141506	-1.21772
CDKL1	NM_004196	0.00263698	-1.2176
HOXD11	NM_021192	0.0373727	-1.21637
PIGZ	NM_025163	0.00947682	-1.21537
BTBD14B	NM_052876	0.0174864	-1.21424
DERA	NM_015954	0.0241151	-1.21363
PEX26	NM_017929	0.0363919	-1.21254
CIRBP	NR_023312	0.0339789	-1.21193
INPPL1	NM_001567	0.0220073	-1.21175
EIF1AD	NM_032325	0.0241873	-1.21079
MID1	NM_000381	0.0290897	-1.20979
PAX3	NM_181458	0.0285329	-1.2092
C20orf11	NM_017896	0.0218031	-1.20834
GNG10	NM_001017998	0.00644208	-1.20757
TOMM34	NM_006809	0.0282559	-1.20714
TBC1D16	NM_019020	0.0358893	-1.20643
DAGLA	NM_006133	0.0488275	-1.20584
LOC339123	NM_001005920	0.0419727	-1.20554
GJA3	NM_021954	0.0332996	-1.2049
CCDC57	NM_198082	0.0389259	-1.20322
AKT1S1	NM_032375	0.0334555	-1.20268
BLOC1S2	NM_001001342	0.0459813	-1.2024
MCRS1	NM_006337	0.0407742	-1.20196
BECN1	NM_003766	0.00989443	-1.20122
ACCN2	NM_020039	0.0447513	-1.20086
PICALM	NM_007166	0.0431993	-1.20016
CNTROB	NM_001037144	0.0325199	-1.19915
WASF3	NM_006646	0.0374315	-1.19679
LOC285908	NM_181722	0.0311088	-1.19677
CCDC71	NM_022903	0.00910637	-1.1961
GOLM1	NM_016548	0.0227724	-1.19454
ANKRD44	NM_153697	0.0406003	-1.19441
PXMP2	NM_018663	0.0476252	-1.19408
POLL	NM_013274	0.01693	-1.19399
SLC37A4	NM_001467	0.0461245	-1.1927
FBXO31	NM_024735	0.0231055	-1.19218
SLC25A46	NM_138773	0.0470695	-1.19199
GLUL	NM_002065	0.0204734	-1.19159
SLC16A10	NM_018593	0.0194933	-1.19082
TMEM65	NM_194291	0.0251493	-1.18993
NDUFV1	NM_007103	0.00863258	-1.18831
HDAC6	NM_006044	0.0275182	-1.18789
SPATA5L1	NM_024063	0.0326971	-1.18504
IRS1	NM_005544	0.0336299	-1.18483
MUS81	NM_025128	0.0177334	-1.18455
CXXC1	NM_001101654	0.00692919	-1.1841
LUC7L	NM_018032	0.048746	-1.18109
SMAD3	NM_005902	0.025512	-1.18082
CCRK	NM_178432	0.00201615	-1.18076
CCDC97	NM_052848	0.012672	-1.1806
KLHL21	NM_014851	0.0288387	-1.18012
STARD7	NM_020151	0.00667909	-1.17971
SPNS1	NM_032038	0.0151385	-1.17971
PPM1B	NM_177968	0.0488879	-1.17932
PLXNA3	NM_017514	0.0388349	-1.17474
L3MBTL2	NM_031488	0.0318004	-1.17353
FBXO44	NM_001014765	0.0288074	-1.17296
C19orf55	NM_001039887	0.0485867	-1.17201
FBXO18	NM_032807	0.0219726	-1.17116
MGC13379	NM_016499	0.0356436	-1.169
YWHAQ	NM_006826	0.0354597	-1.16848
NEIL2	NM_145043	0.0437854	-1.16842
CYBASC3	NM_153611	0.0300041	-1.16817
TM2D3	NM_078474	0.0180339	-1.16727
B3GNTL1	NM_001009905	0.0326883	-1.16723
AKR1B1	NM_001628	0.0239978	-1.16683
POLD2	NM_006230	0.0342012	-1.16242
PLEKHM1	NM_014798	0.00814769	-1.16199
SLC15A4	NM_145648	0.00220146	-1.16189
C11orf65	NM_152587	0.0361978	-1.15981
FLJ11506	NM_024666	0.0440239	-1.15899
N-PAC	NM_032569	0.0172484	-1.15896
ARL5B	NM_178815	0.0149237	-1.1557
PEPD	NM_000285	0.0341181	-1.15422
KLHL22	NM_032775	0.0396077	-1.15414
CAD	NM_004341	0.0360832	-1.1527
PHF13	NM_153812	0.0340717	-1.15061
CRKL	NM_005207	0.00846887	-1.14775
ALG12	NM_024105	0.0437271	-1.14498
ATXN7L2	NM_153340	0.000245468	-1.14384
METTL9	NM_016025	0.033276	-1.13813
UBAP2	NM_018449	0.0299468	-1.13672
C21orf51	NM_058182	0.0450631	-1.13309
SLC25A17	NM_006358	0.0324996	-1.13119
C11orf49	NM_001003676	0.0207952	-1.12939
SYMPK	NM_004819	0.0379542	-1.12584
RIC8A	NM_021932	0.00311409	-1.12516
GBA2	NM_020944	0.0237054	-1.12412
PSMA7	NM_002792	0.0291339	-1.12029
C19orf44	NM_032207	0.0347602	-1.11959
PDPN	NM_006474	0.0334835	-1.11857
PER1	NM_002616	0.0480471	-1.11843
METTL3	NM_019852	0.0258482	-1.11737
MBD1	NM_015846	0.0229877	-1.11649
HEMK1	NM_016173	0.0242172	-1.11585
WFDC12	NM_080869	0.0348798	-1.11329
CCDC32	NM_001080791	0.020967	-1.10802
ACAD8	NM_014384	0.0497365	-1.10774
PPP1R3D	NM_006242	0.0405912	-1.10538
PRMT2	NM_206962	0.00839794	-1.10527
C19orf6	NM_001033026	0.049459	-1.10169
VHL	NM_000551	0.0489644	-1.09605
TMED2	NM_006815	0.0449766	-1.0808
ADO	NM_032804	0.0375231	-1.06508
MRPS5	NM_031902	0.00785806	1.08134
POLR2A	NM_000937	0.0277507	1.09132
TBC1D9B	NM_198868	0.0451879	1.1007
CCDC85B	NM_006848	0.0180631	1.1079
PQLC1	NM_025078	0.00343942	1.11523
BACE1	NM_012104	0.0409368	1.11655
GIT1	NM_001085454	0.00644928	1.12959
AMPD2	NM_004037	0.0455678	1.13111
CLIP2	NM_003388	0.0166608	1.1381
EVC2	NM_147127	0.0194348	1.1424
PLCB3	NM_000932	0.0271663	1.14425
MAP2K3	NM_002756	0.0148372	1.14666
MECR	NM_001024732	0.00748002	1.14789
C11orf17	NM_182901	0.0103991	1.15504
PFKP	NM_002627	0.0466721	1.16738
MSL2L1	NM_018133	0.0254193	1.16857
RNF135	NM_032322	0.0359901	1.17257
RANBP10	NM_020850	0.0274728	1.17284
PRKCI	NM_002740	0.0209912	1.17404
DIP2B	NM_173602	0.0188072	1.17581
TEP1	NM_007110	0.0143642	1.17673
TLN1	NM_006289	0.00191976	1.17859
CTDSP1	NM_021198	0.0301534	1.18931
MADD	NM_003682	0.0159173	1.19573
BIN3	NM_018688	0.0393566	1.19576
TLE4	NM_007005	0.0429992	1.19707
TSPAN14	NM_030927	0.00672223	1.19927
CYP7B1	NM_004820	0.037479	1.20015
APOLD1	NM_030817	0.0403125	1.20056
GMDS	NM_001500	0.00145841	1.20125
C1QTNF6	NM_031910	0.0411913	1.20135
LOC401152	NM_001001701	0.00259631	1.20169
TOMM40L	NM_032174	0.0385427	1.20244
BRD9	NM_023924	0.0361602	1.20526
RRBP1	NM_001042576	0.0224919	1.20691
IL17RA	NM_014339	0.0251717	1.20805
TGFBRAP1	NM_004257	0.0175759	1.20972
VLDLR	NM_003383	0.0317521	1.21055
MAP3K3	NM_203351	0.0166564	1.213
EML3	NM_153265	0.0364495	1.21327
CAPN5	NM_004055	0.0251597	1.21414
FAM65A	NM_024519	0.0278882	1.21634
GOLPH3	NM_022130	0.0498441	1.21753
CNPY3	NM_006586	0.0154574	1.21788
PPP1R9B	NM_032595	0.0232434	1.21916
DUSP3	NM_004090	0.0061037	1.22031
PCDH20	NM_022843	0.0374742	1.22122
ADFP	NM_001122	0.0377707	1.22477
RAP1GAP	NM_002885	0.0233107	1.226
SNRK	NM_017719	0.0355353	1.22756
FGFR1	NM_023110	0.00582199	1.22909
PLSCR3	NM_020360	0.0429911	1.23045
TNFAIP1	NM_021137	0.0399446	1.23397
NOTCH2	NM_024408	0.0300655	1.23595
SPECC1	NM_001033553	0.0234452	1.23689
HDAC7	NM_015401	0.0425331	1.23721
MYADM	NM_001020818	0.0497388	1.23755
GRN	NM_002087	0.049033	1.2397
CDC42SE1	NM_001038707	0.00832917	1.24471
TRIB1	NM_025195	0.0236579	1.24918
MTMR14	NM_001077525	0.0270004	1.25179
MED12	NM_005120	0.0130535	1.25253
ARHGEF11	NM_198236	0.00457156	1.25275
LRRFIP1	NM_004735	0.0383033	1.25284
BCORL1	NM_021946	0.0116454	1.25306
GNA12	NM_007353	0.0182547	1.25455
ACTN4	NM_004924	0.02007	1.25583
LINGO1	NM_032808	0.0455017	1.25631
EXTL3	NM_001440	0.0493387	1.25822
COTL1	NM_021149	0.0325704	1.25934
KIAA1430	NM_020827	0.0357142	1.25985
ATP2B4	NM_001001396	0.0198809	1.26113
ERN1	NM_001433	0.0123664	1.26207
KLF3	NM_016531	0.0288541	1.26246
BMPR1B	NM_001203	0.00470738	1.2657
MAP3K15	NM_001001671	0.011496	1.26678
SKI	NM_003036	0.0127391	1.26685
RAG1AP1	NM_018845	0.0343192	1.2671
ITGAV	NM_002210	0.0373625	1.2672
CUX1	NM_181552	0.0249434	1.26723
SERPINB6	NM_004568	0.0244184	1.27007
STK40	NM_032017	0.0257303	1.27355
NANS	NM_018946	0.0170038	1.2751
CPD	NM_001304	0.0392285	1.27529
DUSP1	NM_004417	0.00915246	1.27543
CNN3	NM_001839	0.0369365	1.27549
S100G	NM_004057	0.0295651	1.28008
AP2S1	NM_004069	0.0349413	1.28124
ARPC5L	NM_030978	0.019084	1.28478
ABCD2	NM_005164	0.0239818	1.28602
ARHGAP4	NM_001666	0.0443012	1.28708
TEAD3	NM_003214	0.023496	1.28834
GPR4	NM_005282	0.0120387	1.29096
FAM129A	NM_052966	0.0367453	1.29138
PDE1B	NM_000924	0.0307007	1.29164
DNHL1	NM_173645	0.03597	1.29485
SCAMP3	NM_005698	0.006064	1.29885
SH3KBP1	NM_031892	0.0172255	1.30149
TRIM6-TRIM34	NM_001003819	0.0407176	1.30152
ARHGEF2	NM_004723	0.0259961	1.3025
ARD1A	NM_003491	0.0471925	1.30358
CPNE7	NM_014427	0.0412976	1.30364
DNASE1	NM_005223	0.0366728	1.30547
WDR26	NM_025160	0.0452172	1.30593
CMIP	NM_198390	0.0113514	1.31243
FAM62A	NM_015292	0.0229603	1.31293
CA13	NM_198584	0.0427982	1.31632
OSBPL3	NM_015550	0.029394	1.31743
EXOC7	NM_001013839	0.0188332	1.31917
TACC1	NM_006283	0.0341906	1.32394
SRGAP3	NM_014850	0.0145402	1.32531
NECAP2	NM_018090	0.0254906	1.32781
KCNN1	NM_002248	0.0316708	1.32852
SLC22A4	NM_003059	0.00520901	1.32926
ANXA6	NM_001155	0.0446235	1.32945
LENG9	NM_198988	0.0499182	1.32969
PTPRF	NM_002840	0.00208693	1.33265
STAT4	NM_003151	0.0289254	1.33642
CMTM7	NM_138410	0.0456069	1.33714
PCDHB16	NM_020957	0.0262227	1.33759
FSCN1	NM_003088	0.0303496	1.33865
HIP1R	NM_003959	0.00293748	1.33875
SPTAN1	NM_003127	0.0127407	1.33976
CABLES1	NM_001100619	0.00742998	1.33995
B4GALT3	NM_003779	0.0169141	1.34056
TBC1D2	NM_018421	0.00997956	1.34104
KIF13B	NM_015254	0.00125697	1.34376
DENND3	NM_014957	0.0319261	1.34387
UGCG	NM_003358	0.0207036	1.34393
OR52A5	NM_001005160	0.0331795	1.34427
BRPF1	NM_001003694	0.00854077	1.34465
ANKS1B	NM_152788	0.0134954	1.34467
COL25A1	NM_198721	0.0275273	1.34607
TTL	NM_153712	0.0299605	1.34737
TGFB1	NM_000660	0.00240199	1.3488
PRR16	NM_016644	0.0469391	1.35017
APAF1	NM_181861	0.0296889	1.35059
TSC22D4	NM_030935	0.0106127	1.35497
TBC1D4	NM_014832	0.0146731	1.35751
FZD8	NM_031866	0.0258383	1.36064
UBE2E2	NM_152653	0.0478067	1.36112
RCP9	NM_014478	0.0298511	1.36452
ATP8B2	NM_020452	0.0210848	1.36587
PALM2-AKAP2	NM_007203	0.0202326	1.36675
STOM	NM_004099	0.000649966	1.36685
PFDN5	NM_002624	0.0460203	1.36811
LMO2	NM_005574	0.0414173	1.36815
APOBEC3D	NM_152426	0.0423806	1.37333
CCDC93	NM_019044	0.0145616	1.37387
DSP	NM_004415	0.037955	1.37494
RHOC	NM_175744	0.0442476	1.37609
C1QTNF7	NM_031911	0.0096834	1.37681
DHRS7B	NM_015510	0.000613864	1.37789
SLC24A6	NM_024959	0.00886137	1.37796
ITPKB	NM_002221	0.0192363	1.37869
PPFIBP1	NM_003622	0.0116035	1.38053
KCND1	NM_004979	0.0389161	1.38107
BIN1	NM_139343	0.0247614	1.3825
RASA3	NM_007368	0.0113567	1.38348
ROR1	NM_005012	0.0191876	1.38412
FZD4	NM_012193	0.0439969	1.38496
NPTN	NM_012428	0.00451512	1.38537
PITPNC1	NM_181671	0.0239828	1.38606
HIP1	NM_005338	0.0211492	1.38689
PRSS7	NM_002772	0.0076423	1.38859
OR13C2	NM_001004481	0.0360513	1.38967
PTPRJ	NM_002843	0.0414676	1.39455
GPR18	NM_005292	0.015309	1.39724
MAP3K5	NM_005923	0.0428096	1.3973
PAG1	NM_018440	0.01321	1.3988
CCDC149	NM_173463	0.0243269	1.40192
IWS1	NM_017969	0.0307644	1.40201
SPTLC2	NM_004863	0.0104276	1.40206
CREB3L2	NM_194071	0.0193597	1.40354
PRICKLE1	NM_153026	0.0197946	1.40423
APBB2	NM_173075	0.00653767	1.4047
CD79A	NM_001783	0.0237245	1.40646
TCEB1	NM_005648	0.000869684	1.40732
SCN8A	NM_014191	0.0043452	1.41015
RPGR	NM_000328	0.0403588	1.41038
SLC12A6	NM_001042496	0.0260565	1.41131
PLEKHO2	NM_025201	0.0319086	1.41196
BNC1	NM_001717	0.0139858	1.41522
NR3C1	NM_000176	0.00241031	1.41578
GPR124	NM_032777	0.00641023	1.41795
TCFL5	NM_006602	0.0131387	1.41867
DYNLT1	NM_006519	0.0317758	1.42025
P2RY1	NM_002563	0.0266606	1.42277
ITPR3	NM_002224	0.022944	1.42309
ARRDC2	NM_015683	0.0378778	1.42528
F2R	NM_001992	0.0183619	1.42607
MTP18	NM_016498	0.00704226	1.42737
CNRIP1	NM_015463	0.0343401	1.4305
CEP68	NM_015147	0.00707682	1.43424
PIK3C2B	NM_002646	0.00470298	1.43727
ARSB	NM_000046	0.0155278	1.44177
ANXA1	NM_000700	0.0179511	1.44323
FYB	NM_001465	0.0399088	1.44414
KALRN	NM_007064	0.0090907	1.44551
GRIK5	NM_002088	0.00930448	1.44831
EFCAB5	NM_198529	0.0254915	1.45252
LMO7	NM_005358	0.039502	1.45576
HIVEP2	NM_006734	0.0075129	1.45752
LAMA2	NM_000426	0.0465788	1.45807
MDFI	NM_005586	0.000267929	1.45853
COL4A1	NM_001845	0.0116081	1.46116
REG3G	NM_001008387	0.00808409	1.4616
TMPRSS2	NM_005656	0.0326813	1.46179
SPI1	NM_001080547	0.0118488	1.46343
NEK11	NM_024800	0.0293697	1.46357
SIRPA	NM_001040022	0.0407126	1.46359
AK7	NM_152327	0.0471611	1.46919
PRKD2	NM_016457	0.0048212	1.47059
CUBN	NM_001081	0.0264864	1.47082
SPRED2	NM_181784	0.00134144	1.47215
SH3GL1	NM_003025	0.0139736	1.47431
ULK4	NM_017886	0.0258683	1.47548
ADRBK1	NM_001619	0.00210342	1.48015
HCLS1	NM_005335	0.0273389	1.48159
GNG7	NM_052847	0.029607	1.48239
C8orf58	NM_001013842	0.0168185	1.48959
FER1L3	NM_013451	0.040552	1.49093
CNTNAP1	NM_003632	0.00377884	1.49298
BANF1	NM_003860	0.0380612	1.49347
PPM1F	NM_014634	0.0137244	1.49405
AEBP1	NM_001129	0.0482497	1.49613
ITGA5	NM_002205	0.000563602	1.49617
SERTAD1	NM_013376	0.043473	1.49621
ANPEP	NM_001150	0.0398052	1.49796
PKP4	NM_003628	0.0117823	1.49829
TFAP2C	NM_003222	0.00609763	1.50341
OR10A5	NM_178168	0.00603479	1.50669
TMEM173	NM_198282	0.0336433	1.50893
APOL4	NM_030643	0.0138477	1.50908
ITGA6	NM_000210	0.039911	1.50939
THSD3	NM_199265	0.00813609	1.50944
SLC2A5	NM_003039	0.00829426	1.50987
DGKH	NM_178009	0.0475824	1.51071
UBE2J1	NM_016021	0.040294	1.51119
RECK	NM_021111	0.0417502	1.5137
SLC27A2	NM_003645	0.0150922	1.51423
NCKAP1L	NM_005337	0.0239759	1.51829
MTSS1	NM_014751	0.0313166	1.5194
JAK1	NM_002227	0.0129164	1.52098
BCAM	NM_005581	0.0145964	1.52263
TNFRSF1A	NM_001065	0.0088757	1.52303
SYNJ1	NM_003895	0.046718	1.52388
ARHGAP26	NM_015071	0.0159647	1.52442
PLCB4	NM_000933	0.00572732	1.52589
SLC16A4	NM_004696	0.0199311	1.52632
DUSP7	NM_001947	0.00384589	1.53038
PDE3A	NM_000921	0.0385913	1.53185
ENTPD1	NM_001776	7.5e-05	1.5349
GBP3	NM_018284	0.0369197	1.53633
MMRN1	NM_007351	0.0282081	1.53753
HLA-E	NM_005516	0.00413275	1.53847
IL27RA	NM_004843	0.0111134	1.54188
ENG	NM_000118	0.00457188	1.54426
ZNFX1	NM_021035	0.00232703	1.54428
CMTM3	NM_144601	0.00601078	1.54712
LMCD1	NM_014583	0.0407835	1.54828
C2orf40	NM_032411	0.00246996	1.55239
IRF1	NM_002198	0.0328906	1.55453
KRT2	NM_000423	0.0358826	1.55948
QSOX1	NM_002826	0.0275484	1.56152
RASSF4	NM_032023	0.0153442	1.56243
ATP13A4	NM_032279	0.034267	1.564
SLC4A1	NM_000342	0.0464505	1.56875
PTPN14	NM_005401	0.00208359	1.56973
SLC7A11	NM_014331	0.034907	1.57023
KIF9	NM_182902	0.0108926	1.57066
CRYL1	NM_015974	0.0380232	1.57159
FRMD6	NM_001042481	0.00637188	1.57329
LAMC1	NM_002293	0.00461601	1.57486
ORAI1	NM_032790	0.00384002	1.57652
SAMD4A	NM_015589	0.0185786	1.5768
NUCB2	NM_005013	0.0260958	1.58156
NGFR	NM_002507	0.0246932	1.58553
CLIC1	NM_001288	0.000423515	1.58611
PEA15	NM_003768	0.0223311	1.5955
JAK3	NM_000215	0.0369833	1.59563
SLC44A2	NM_020428	0.00195144	1.5969
ARPC1B	NM_005720	0.036667	1.59872
CRIP2	NM_001312	0.0273428	1.60037
GNB4	NM_021629	0.0136204	1.60316
FAM130A2	NM_024969	0.020226	1.60511
MMP3	NM_002422	0.0444998	1.60575
UACA	NM_018003	0.0126367	1.60775
OR4D2	NM_001004707	0.0117953	1.6082
PRKAA2	NM_006252	0.00296718	1.60874
ETV6	NM_001987	0.00275168	1.61005
FAM110A	NM_001042353	0.00272274	1.61027
CSMD3	NM_198123	0.0239702	1.61093
SSH2	NM_033389	0.0326917	1.61108
COCH	NM_004086	0.00876977	1.62093
KIAA1161	NM_020702	0.000893769	1.62243
GLT8D2	NM_031302	0.0363794	1.62309
LUZP1	NM_033631	0.0139867	1.62394
SLC17A7	NM_020309	0.00480948	1.62546
THY1	NM_006288	0.000959079	1.62686
HSPG2	NM_005529	0.0211738	1.62762
FCHSD2	NM_014824	0.0371889	1.6283
VMO1	NM_182566	0.0327272	1.6374
GBE1	NM_000158	0.0328365	1.63762
PTHLH	NM_198965	0.0475534	1.63889
ARHGEF10	NM_014629	0.00554474	1.63968
TNIK	NM_015028	0.0426387	1.64007
CDS1	NM_001263	0.0339328	1.64061
MS4A6A	NM_152852	0.0316864	1.64104
TNFRSF10D	NM_003840	0.0100304	1.64187
NLRP1	NM_033004	0.0199421	1.64256
FCGBP	NM_003890	0.0207989	1.64593
IKZF1	NM_006060	0.00407536	1.64697
NPY5R	NM_006174	0.0194706	1.64866
CAMK2N1	NM_018584	0.0284803	1.64882
CARD6	NM_032587	0.0236594	1.65352
RGL2	NM_004761	0.0189558	1.65617
GREB1	NM_014668	0.00355853	1.65972
PCDHB15	NM_018935	0.0178779	1.66507
CALML4	NM_033429	0.0277594	1.66911
NR4A3	NM_173198	0.00911022	1.67131
PLK2	NM_006622	0.0223925	1.67444
TSPAN18	NM_130783	0.00868773	1.67837
TMC6	NM_007267	0.0298011	1.67894
MYH9	NM_002473	0.00105344	1.6797
CD97	NM_078481	0.0268519	1.67973
APOL6	NM_030641	0.00461234	1.68301
PIK3CD	NM_005026	0.0260242	1.68477
AADACL1	NM_020792	0.0029964	1.68833
ADORA2B	NM_000676	0.04857	1.69155
C3orf64	NM_173654	0.0483982	1.69636
PTPN5	NM_006906	0.0210308	1.69976
SPARC	NM_003118	0.0144774	1.7006
RASD2	NM_014310	0.00521403	1.70288
BAI3	NM_001704	0.0166111	1.70345
RGL1	NM_015149	0.0326287	1.70565
DOCK10	NM_014689	0.0117914	1.70834
ST6GAL1	NM_173216	0.0105201	1.70951
SAMD9L	NM_152703	0.0037036	1.71093
SRGN	NM_002727	0.0258441	1.71284
TBXAS1	NM_001061	0.0344459	1.71359
GRAMD3	NM_023927	0.0453198	1.71381
KCNN3	NM_002249	0.00988692	1.71884
ICA1	NM_004968	0.0360892	1.71955
ALOX5AP	NM_001629	0.0358266	1.72173
TGFBR3	NM_003243	0.0284708	1.72344
FGD3	NM_001083536	0.0296231	1.72464
DAAM2	NM_015345	0.000846115	1.7253
RNASE6	NM_005615	0.00113332	1.72637
ARHGAP9	NM_032496	0.0065623	1.72911
GRIA1	NM_000827	0.041939	1.73036
PLXND1	NM_015103	0.0257686	1.7358
PTP4A3	NM_032611	0.00829648	1.74267
NAV1	NM_020443	0.0136218	1.74524
KIAA1949	NM_133471	0.00763262	1.74649
KLF10	NM_005655	0.0152591	1.74797
IER2	NM_004907	0.00113914	1.75135
OSMR	NM_003999	0.0138744	1.75232
PDE4B	NM_002600	0.013298	1.75336
SGK3	NM_013257	0.0166592	1.7628
DPEP1	NM_004413	0.00316161	1.76444
ACSL5	NM_016234	0.0295973	1.77694
FYN	NM_002037	0.0147984	1.7816
SERINC5	NM_178276	0.00292292	1.7872
SV2B	NM_014848	0.013718	1.78843
GRAMD1C	NM_017577	0.0124642	1.79061
WASF2	NM_006990	0.0258381	1.79316
RPS6KA2	NM_021135	0.016724	1.79673
IL2RG	NM_000206	0.00691015	1.80117
FZD7	NM_003507	0.017573	1.80815
GPR21	NM_005294	0.0472068	1.81372
MMRN2	NM_024756	0.045951	1.81404
CAMK2D	NM_172127	0.0346247	1.8205
FXYD5	NM_144779	0.00438326	1.82752
WWC2	NM_024949	0.00876698	1.83113
OAS2	NM_002535	0.0373033	1.83243
B3GNT3	NM_014256	0.0457288	1.83637
MERTK	NM_006343	0.0111989	1.83931
BHLHB2	NM_003670	0.0198349	1.85083
PHLDB2	NM_145753	0.0267162	1.8567
RAB8B	NM_016530	0.0428433	1.85949
TNS1	NM_022648	0.00254668	1.86023
CCR10	NM_016602	0.0207304	1.86247
HAP1	NM_003949	0.0115761	1.8632
ZNF654	NM_018293	0.0343761	1.87445
BCAR3	NM_003567	0.033684	1.8841
CRIM1	NM_016441	0.0382941	1.88971
SEMA3F	NM_004186	0.010685	1.89314
INPP5D	NM_001017915	0.00703208	1.89816
MAP3K11	NM_002419	0.00265651	1.90977
ST3GAL5	NM_003896	0.0151425	1.91414
GRAP	NM_006613	0.0288847	1.9146
SLC43A1	NM_003627	0.00755147	1.91745
KIAA0746	NM_015187	0.00709903	1.92167
PARP14	NM_017554	0.0120427	1.92512
MAMLD1	NM_005491	0.0222863	1.92612
TMEM144	NM_018342	0.0322048	1.92661
CORO2B	NM_006091	0.034771	1.9298
TP53I3	NM_004881	0.0423803	1.93142
SLC2A3	NM_006931	0.00179878	1.93149
UTRN	NM_007124	0.00345387	1.9323
FBN2	NM_001999	0.0466768	1.93254
CYP1B1	NM_000104	0.0170542	1.93364
GBP4	NM_052941	0.0382164	1.93492
LHX9	NM_020204	0.0116109	1.94242
FLT1	NM_002019	0.0112367	1.9425
C4orf32	NM_152400	0.00763543	1.94408
ERAP1	NM_001040458	0.00814262	1.94442
TSPAN15	NM_012339	0.00223968	1.94572
SYNJ2	NM_003898	0.0183101	1.94641
DOCK4	NM_014705	0.00544063	1.95262
CAMK1D	NM_153498	0.00188942	1.95494
ZC3HAV1	NM_020119	0.00510905	1.95542
P4HA3	NM_182904	0.0351186	1.96081
PHACTR2	NM_001100164	0.0111945	1.96197
CLCA2	NM_006536	0.0331833	1.96381
GIMAP5	NM_018384	0.0348678	1.9752
WIPF1	NM_003387	0.0120785	1.9765
FLRT2	NM_013231	0.0276529	1.9805
C21orf29	NM_144991	0.00355641	1.98167
CTSK	NM_000396	0.0231587	1.98754
ELK3	NM_005230	0.000479275	2.00174
RAB43	NM_198490	0.000321382	2.00272
CLSTN2	NM_022131	0.00427211	2.00391
ELF4	NM_001421	0.00083934	2.01125
ACPP	NM_001099	0.00212879	2.01355
MAPK11	NM_002751	0.0165269	2.01784
TMOD1	NM_003275	0.0111365	2.01798
MAS1	NM_002377	0.0454596	2.0217
HSPA6	NM_002155	0.0325596	2.0303
F11R	NM_016946	0.0018549	2.03943
TMEM71	NM_144649	0.0326418	2.05393
TGFA	NM_003236	0.0498539	2.05765
TRAM2	NM_012288	0.00967079	2.07995
RUNDC3B	NM_138290	0.0438751	2.09854
VAMP5	NM_006634	0.000643605	2.10115
PPP1R13B	NM_015316	0.00169592	2.11399
LRRC4	NM_022143	0.00607825	2.11574
PRKCH	NM_006255	0.00682456	2.12371
ATP8B1	NM_005603	0.0302321	2.13886
CD226	NM_006566	0.0070388	2.14705
CD3E	NM_000733	0.0161503	2.16725
TNFSF10	NM_003810	0.00323401	2.17337
PLD1	NM_002662	0.00130482	2.17423
CDH2	NM_001792	0.00576894	2.1876
SLC2A9	NM_001001290	0.00887497	2.19627
SEMA3D	NM_152754	0.00610194	2.20268
SAMD9	NM_017654	0.00984423	2.20543
PCDHB17	NR_001280	0.0136291	2.20619
GALNT14	NM_024572	0.024046	2.21291
SEMA3A	NM_006080	0.0175643	2.21581
TNFRSF11A	NM_003839	0.009655	2.22695
AIF1	NM_001623	0.0151225	2.23962
COP1	NM_052889	0.0217604	2.24804
SOX18	NM_018419	0.021976	2.25375
PAPSS2	NM_004670	0.00278824	2.25659
RASGRP3	NM_170672	0.0390997	2.25681
RAMP2	NM_005854	0.00371957	2.26449
PTPRB	NM_001109754	0.00312992	2.28236
PRKCZ	NM_001033582	0.0321714	2.28463
SQRDL	NM_021199	0.00460609	2.29988
SLIT2	NM_004787	0.011959	2.30265
GIMAP1	NM_130759	0.00509514	2.31591
SGK1	NM_005627	0.00597647	2.3179
CD70	NM_001252	0.0432076	2.3288
LIMCH1	NM_014988	0.0120894	2.33448
PROM1	NM_006017	0.0375269	2.33589
QPCT	NM_012413	0.00544874	2.33854
AKAP5	NM_004857	0.0169877	2.35691
FATE1	NM_033085	0.0340355	2.37245
CD34	NM_001773	0.00936984	2.38251
ZNF792	NM_175872	0.00253709	2.39477
SPOCK2	NM_014767	0.0282095	2.39685
SERPINI1	NM_001122752	0.0495869	2.40375
ARRB1	NM_004041	0.00147484	2.43036
RGS4	NM_001102445	0.00183755	2.4423
NOS3	NM_000603	0.00872918	2.4492
PCDH12	NM_016580	0.00865778	2.45079
FHOD1	NM_013241	0.000374795	2.51611
UBASH3B	NM_032873	0.00809696	2.52233
CD69	NM_001781	0.0174423	2.54886
GNG12	NM_018841	0.00937653	2.56284
SCARF1	NM_145351	0.0122427	2.5789
RNF125	NM_017831	0.0279965	2.59047
FCGR2B	NM_004001	0.0251191	2.59436
LPHN2	NM_012302	0.00461673	2.60156
RNF144B	NM_182757	0.0023736	2.61665
GFPT2	NM_005110	0.0363506	2.6409
HAPLN3	NM_178232	0.0156881	2.6444
IFI16	NM_005531	0.0330714	2.64469
RASAL2	NM_170692	0.00292449	2.67529
EPHA2	NM_004431	0.00305698	2.69381
LEMD1	NM_001001552	0.0159415	2.69504
TLR1	NM_003263	0.00473279	2.72447
SEMA6D	NM_153618	0.00192436	2.73805
FUCA1	NM_000147	0.00910639	2.74108
HBEGF	NM_001945	0.0158913	2.75331
EXOC3L	NM_178516	0.000828154	2.77925
CALCRL	NM_005795	0.0169392	2.78352
SCN3B	NM_018400	0.00916984	2.79349
EPAS1	NM_001430	0.0079811	2.79692
PECAM1	NM_000442	0.00478802	2.82573
PROCR	NM_006404	0.00102771	2.86451
GPR126	NM_020455	0.0284653	2.8736
EFNA1	NM_004428	0.0177558	2.91819
SH2D3C	NM_170600	0.0078932	2.92369
HSD17B2	NM_002153	0.00944682	2.92867
LGR5	NM_003667	0.00572667	2.94541
EMB	NM_198449	0.00258754	2.95326
GCH1	NM_000161	0.000471973	2.95999
B4GALT6	NM_004775	0.00524349	2.9601
CLDN5	NM_003277	0.0211143	3.01146
TMEM87B	NM_032824	0.00170251	3.038
MLKL	NM_152649	0.00305058	3.0386
GNG11	NM_004126	0.0128781	3.04964
RPL24	NM_000986	0.00558998	3.05145
CASP4	NM_033306	0.0188581	3.07419
GPR116	NM_015234	0.00365618	3.0861
MLSTD1	NM_018099	0.00362681	3.10263
NPR1	NM_000906	0.0197883	3.14804
RAI14	NM_015577	0.000444478	3.17006
CPNE8	NM_153634	0.0112544	3.1707
PI15	NM_015886	0.0409889	3.17155
TFPI	NM_006287	0.00594435	3.17286
LGALS12	NM_033101	0.00209887	3.20758
RASIP1	NM_017805	0.000948898	3.24913
ADCY4	NM_139247	0.00387763	3.32062
ADAMTSL5	NM_213604	0.0111716	3.348
SLC5A4	NM_014227	0.00400646	3.3609
CTSL1	NM_001912	0.000480638	3.38972
VAV3	NM_006113	0.00324488	3.41063
SH2D1A	NM_002351	0.00178173	3.44184
FERMT3	NM_178443	0.000549046	3.4464
SCAMP5	NM_138967	0.00041289	3.47314
EMCN	NM_016242	0.0277676	3.56928
CXCL11	NM_005409	0.023152	3.59714
TM4SF1	NM_014220	0.00019318	3.65243
PLEK	NM_002664	0.00150246	3.68468
PIK3CG	NM_002649	0.000894363	3.69986
CEACAM1	NM_001712	0.00585375	3.74197
APLN	NM_017413	0.00759387	3.7963
RHOJ	NM_020663	0.000826599	3.87901
TFPI2	NM_006528	0.00286578	3.94324
BGN	NM_001711	0.00505446	4.01053
KDR	NM_002253	0.00355025	4.01367
SLC27A3	NM_024330	0.0010757	4.02805
TSPAN8	NM_004616	0.0076199	4.08323
GIMAP2	NM_015660	0.00470562	4.11384
G0S2	NM_015714	0.000196108	4.15133
ICAM1	NM_000201	0.00173157	4.20206
HLA-DMB	NM_002118	0.00803463	4.29806
CCL2	NM_002982	0.00914794	4.36467
RNASE1	NM_198232	0.0155288	4.43803
SLC15A2	NM_021082	0.000733701	4.4794
FOXJ1	NM_001454	0.00383558	4.53394
THSD1	NM_018676	0.00165377	4.53527
LSDP5	NM_001013706	0.00166343	4.56963
VAV1	NM_005428	0.00143238	4.58864
TIE1	NM_005424	0.00326928	4.64663
FCGR2A	NM_021642	0.000756346	4.82349
CARTPT	NM_004291	0.0212449	4.86443
ICAM2	NM_001099786	0.0077497	5.11337
TNFRSF10C	NM_003841	0.00276232	5.20692
C3AR1	NM_004054	0.000369522	5.25684
PTGS2	NM_000963	0.00382869	5.40311
DPP4	NM_001935	0.00960232	5.54918
CLEC1A	NM_016511	0.00167646	5.73831
ASB9	NM_024087	3.88e-05	5.85664
GIMAP4	NM_018326	0.000819971	5.87742
ADAMTS4	NM_005099	0.000434225	6.73826
GIMAP8	NM_175571	0.0029161	6.80464
LOC57228	NM_001033873	7.35e-05	7.03974
LAPTM5	NM_006762	0.00011831	7.08889
CACNA2D2	NM_001005505	0.00325965	7.36836
GMFG	NM_004877	0.00128892	7.42214
TM4SF18	NM_138786	0.00167554	7.81121
SILV	NM_006928	0.00330693	8.39645
CSF3R	NM_156039	0.00247429	8.57003
PLVAP	NM_031310	0.0012822	8.75728
FLI1	NM_002017	0.000503712	10.4167
SMR3B	NM_006685	0.00196785	10.5274
ZP2	NM_003460	0.00320129	10.5714

## Sheet: HUVEC EWS-FLI vs Knockdown
Gene Symbol	RefSeq	p-value	Fold-Change
KCNAB1	NM_003471	0.0490107	-4.14029
OSAP	NM_032623	0.0470175	-3.31969
TSPAN8	NM_004616	0.00798159	-3.25757
ART4	NM_021071	0.0121569	-2.64227
IL6	NM_000600	0.0279245	-2.61044
IL7R	NM_002185	0.0134914	-2.42451
FAM101A	NM_181709	0.044551	-2.38857
FST	NM_006350	0.00922279	-2.3317
S100A7	NM_002963	0.0254417	-2.29477
ITGB8	NM_002214	0.0211049	-2.21268
HIST1H3J	NM_003535	0.00242169	-2.18794
HYI	NM_031207	0.0262528	-2.13717
HIST1H4D	NM_003539	0.0355183	-2.12334
AMPH	NM_001635	0.00910683	-2.03925
ANKRD55	NM_024669	0.025843	-2.0002
HIST1H2AL	NM_003511	0.00442813	-1.97135
MRFAP1L1	NM_152301	0.0376964	-1.95713
LEPREL1	NM_018192	0.0435037	-1.92197
GPR39	NM_001508	0.00869886	-1.91611
TNIK	NM_015028	0.0145122	-1.91153
GABPB2	NM_005254	0.0431344	-1.90588
SGOL1	NM_001012410	0.0235076	-1.90349
FAM69A	NM_001006605	0.027557	-1.88495
KRT7	NM_005556	0.032985	-1.88313
MAL2	NM_052886	0.0265302	-1.85628
CDKN1B	NM_004064	0.0143622	-1.84748
UTS2D	NM_198152	0.0396052	-1.83748
CYP27A1	NM_000784	0.00307851	-1.82829
MBOAT1	NM_001080480	0.0104175	-1.8271
TAGLN	NM_001001522	0.0128719	-1.80325
LONRF3	NM_001031855	0.0263363	-1.79342
C18orf24	NM_001039535	0.0399501	-1.7929
HJURP	NM_018410	0.0143969	-1.79269
HIST1H3C	NM_003531	0.0210596	-1.78914
HIST1H1A	NM_005325	0.0464955	-1.78128
COL3A1	NM_000090	0.0363013	-1.77208
LRRC16A	NM_017640	0.0484412	-1.76737
TUBA4A	NM_006000	0.00782002	-1.76245
TACC3	NM_006342	0.0388604	-1.75761
HIST1H4F	NM_003540	0.035711	-1.7506
CDC20	NM_001255	0.00585945	-1.7487
ADAMTS6	NM_197941	0.0395265	-1.73933
C10orf96	NM_198515	0.0447623	-1.73682
PCDH18	NM_019035	0.0154577	-1.73077
FLJ25371	NM_152543	0.0460172	-1.73075
RPL5	NM_000969	0.0386311	-1.72934
FHL2	NM_201555	0.0379811	-1.72514
MEOX2	NM_005924	0.0080511	-1.71103
SAFB	NM_002967	0.0331213	-1.71046
PLS1	NM_002670	0.0371227	-1.70077
SLC7A14	NM_020949	0.0335521	-1.69696
STX11	NM_003764	0.0279321	-1.68778
KAL1	NM_000216	0.0126765	-1.68471
PRC1	NM_003981	0.0364973	-1.67693
HNRNPD	NM_031370	0.0130131	-1.67635
DIRAS3	NM_004675	0.049022	-1.66921
OR10A5	NM_178168	0.0147816	-1.65817
NCAPH	NM_015341	0.0446442	-1.64969
ALOX5AP	NM_001629	0.0423617	-1.64371
TNFRSF1B	NM_001066	0.0284917	-1.63871
NPAL1	NM_207330	0.0476707	-1.63288
AXL	NM_021913	0.0364838	-1.63153
FILIP1	NM_015687	0.0377992	-1.62984
RAB43	NM_198490	0.00030922	-1.62792
HNF4G	NM_004133	0.0436048	-1.62623
NEIL3	NM_018248	0.0382291	-1.62279
OIP5	NM_007280	0.0320038	-1.6168
ORC6L	NM_014321	0.00361916	-1.61469
CDKN2C	NM_001262	0.0461871	-1.60017
HIST1H3F	NM_021018	0.0208285	-1.59637
PHGDH	NM_006623	0.0411056	-1.59115
HIST2H2AB	NM_175065	0.0449433	-1.58099
CCNB1	NM_031966	0.00975197	-1.5772
YAP1	NM_006106	0.0439162	-1.57651
PHF19	NM_015651	0.0498937	-1.57608
PSRC1	NM_001032290	0.00293592	-1.56561
CDC6	NM_001254	0.0255154	-1.56532
SLCO2A1	NM_005630	0.032568	-1.55879
HTR1D	NM_000864	0.0234294	-1.55824
INPP4B	NM_003866	0.0252453	-1.55396
SMAD3	NM_005902	0.0486089	-1.55213
HSPC159	NM_014181	0.000569904	-1.54616
TOE1	NM_025077	0.0309189	-1.54412
RBP1	NM_002899	0.036846	-1.53884
CYSLTR2	NM_020377	0.0196003	-1.5386
ZWINT	NM_032997	0.0209985	-1.53561
PHF17	NM_199320	0.0239137	-1.52753
IQGAP3	NM_178229	0.0200735	-1.52615
AEBP1	NM_001129	0.0442411	-1.5246
DPYSL3	NM_001387	0.0261857	-1.51969
ZC3H12A	NM_025079	0.00600744	-1.51967
PLK1	NM_005030	0.040924	-1.51499
SPOCD1	NM_144569	0.043009	-1.5135
IL1RAPL1	NM_014271	0.0307054	-1.51108
ASB7	NM_198243	0.0272265	-1.50627
ZNF189	NM_003452	0.0114213	-1.50401
ANXA2P1	NR_001562	0.0313454	-1.49525
EGFR	NM_005228	0.00504768	-1.49439
AK5	NM_174858	0.00358151	-1.49205
CYorf15A	NM_001005852	0.0353832	-1.49195
CST1	NM_001898	0.0441261	-1.48501
NY-SAR-48	NM_033417	0.0107017	-1.48279
RTN4IP1	NM_032730	0.0282738	-1.48144
OR51F2	NM_001004753	0.0358825	-1.4799
HIST1H4B	NM_003544	0.0210536	-1.47941
MEST	NM_002402	0.0456712	-1.47535
D4S234E	NM_014392	0.00583607	-1.46858
CENPI	NM_006733	0.0308578	-1.4679
PPARD	NM_006238	0.0479151	-1.46716
MBL1P1	NR_002724	0.0124118	-1.4527
ATF4	NM_001675	0.0174492	-1.45233
COX18	NM_173827	0.0100533	-1.4488
DIXDC1	NM_001037954	0.0276422	-1.44814
ADAT3	NM_138422	0.047271	-1.4457
PLCD4	NM_032726	0.00446095	-1.44365
LOC150763	NM_207328	0.041533	-1.44327
CENPA	NM_001809	0.00557374	-1.44117
HIST1H2AK	NM_003510	0.0212554	-1.44078
CCDC43	NM_144609	0.0487856	-1.43404
THTPA	NM_024328	0.0232392	-1.4267
IGFBP7	NM_001553	0.0355673	-1.41906
SKIV2L2	NM_015360	0.0353146	-1.417
C4orf32	NM_152400	0.00684731	-1.41518
BARD1	NM_000465	0.0317429	-1.40546
ANK3	NM_020987	0.0201252	-1.40351
PSMC3IP	NM_013290	0.0038006	-1.39699
ORC1L	NM_004153	0.0102589	-1.39571
MICB	NM_005931	0.0354763	-1.3946
CDC45L	NM_003504	0.0422894	-1.39253
TK1	NM_003258	0.0394646	-1.39251
KIF4A	NM_012310	0.0482154	-1.39214
HEMGN	NM_018437	0.036523	-1.38979
KLF9	NM_001206	0.0191742	-1.38921
SPTLC3	NM_018327	0.0320827	-1.38725
IER3	NM_003897	0.0195676	-1.38469
IRF2BP2	NM_182972	0.00362417	-1.38086
E2F7	NM_203394	0.0192512	-1.37166
EHD4	NM_139265	0.0247735	-1.36857
NRM	NM_007243	0.0279605	-1.36131
RPS6KA1	NM_002953	0.0316522	-1.36026
CKS2	NM_001827	0.0273233	-1.36007
TMEM18	NM_152834	0.0240696	-1.358
SMAD7	NM_005904	0.00844494	-1.35341
ARL4D	NM_001661	0.0070999	-1.34971
RBM44	NM_001080504	0.0468158	-1.34815
LRRC7	NM_020794	0.0249151	-1.34444
PTGER4	NM_000958	0.000473041	-1.34265
MTUS1	NM_001001924	0.0272666	-1.34156
MED21	NM_004264	0.0348519	-1.34113
DNAH8	NM_001371	0.0132588	-1.3395
TCF19	NM_007109	0.022284	-1.33883
NR5A2	NM_205860	0.0483795	-1.33715
GINS3	NM_001126129	0.00964336	-1.32942
C14orf138	NM_024558	0.0459587	-1.32536
CDCA5	NM_080668	0.047505	-1.32367
RARRES1	NM_206963	0.0282383	-1.32043
GCNT1	NM_001097634	0.0417782	-1.31965
NR2C2AP	NM_176880	0.0158184	-1.31954
HOMER3	NM_004838	0.0393	-1.3151
C1R	NM_001733	0.0236778	-1.31423
FANCE	NM_021922	0.020306	-1.31328
PYCARD	NM_013258	0.00211003	-1.31087
ZCCHC10	NM_017665	0.036738	-1.30991
MON1B	NM_014940	0.0429147	-1.30944
POF1B	NM_024921	0.0111965	-1.30936
KYNU	NM_003937	0.0486603	-1.30889
ZNF396	NM_145756	0.044956	-1.30573
DGUOK	NM_080916	0.0178513	-1.29849
TUBB2C	NM_006088	0.0240751	-1.29418
DAPK3	NM_001348	0.038976	-1.29154
ZNF511	NM_145806	0.0180264	-1.28927
ISOC1	NM_016048	0.021851	-1.2879
C1orf168	NM_001004303	0.0273224	-1.28763
SOX17	NM_022454	0.00863352	-1.28658
RDH14	NM_020905	0.00288314	-1.28536
VEGFC	NM_005429	0.034966	-1.2838
FASTK	NM_006712	0.0470414	-1.28136
ACTR3B	NM_020445	0.0255278	-1.28034
EXOSC2	NM_014285	0.0255177	-1.2795
C7orf20	NM_015949	0.0122491	-1.27426
KLHDC4	NM_017566	0.00747164	-1.27388
MAP3K7IP1	NM_006116	0.0194932	-1.27387
GPSN2	NM_138501	0.033898	-1.27083
SH3RF1	NM_020870	0.03144	-1.27037
FAM129B	NM_022833	0.0253234	-1.26678
HIST1H2AG	NM_021064	0.0439831	-1.26539
MYO19	NM_025109	0.0116321	-1.2628
PKM2	NM_182470	0.0324276	-1.25992
RND2	NM_005440	0.0490212	-1.25926
ARL5B	NM_178815	0.037074	-1.25882
TIMM13	NM_012458	0.0368836	-1.25615
GPN2	NM_018066	0.0151196	-1.25446
MICAL2	NM_014632	0.0237839	-1.25264
TRAIP	NM_005879	0.0050798	-1.25177
RCC1	NM_001048194	0.00930033	-1.24486
ACTR10	NM_018477	0.00627483	-1.2414
PIGO	NM_032634	0.0302498	-1.24084
NRG1	NM_013960	0.0226505	-1.23407
TMEM186	NM_015421	0.0229554	-1.23006
SCO1	NM_004589	0.0390057	-1.2294
PTPN18	NM_014369	0.0456299	-1.22877
SHMT2	NM_005412	0.0192878	-1.22738
ARL6IP4	NM_001002252	0.0273727	-1.22603
RANGAP1	NM_002883	0.0220848	-1.22468
B3GALNT2	NM_152490	0.0108245	-1.22414
PPAP2C	NM_003712	0.0376151	-1.2211
NUBP1	NM_002484	0.0153371	-1.22028
RAB34	NM_031934	0.00159697	-1.21953
CNNM4	NM_020184	0.0278545	-1.21841
A26A1	NM_001005365	0.0304852	-1.21686
PGRMC1	NM_006667	0.0206165	-1.21363
DHX38	NM_014003	0.0499239	-1.21297
RRAS	NM_006270	0.0384642	-1.21128
DHPS	NM_001930	0.0380966	-1.2096
ADPRHL2	NM_017825	0.0258908	-1.20856
MCM8	NM_032485	0.0128305	-1.20479
TMCO6	NM_018502	0.0173786	-1.20214
RNASEH2A	NM_006397	0.0240228	-1.19939
ZNF672	NM_024836	0.0135911	-1.19916
GRWD1	NM_031485	0.0488905	-1.19861
PREB	NM_013388	0.042958	-1.19838
SUV39H1	NM_003173	0.00751082	-1.19626
CDK2	NM_001798	0.0170906	-1.19591
RPP21	NM_024839	0.00445709	-1.19525
SURF6	NM_006753	0.0238536	-1.18844
ZNF823	NM_001080493	0.00646067	-1.18368
IK	NM_006083	0.0221642	-1.18278
ABHD13	NM_032859	0.0385312	-1.18132
TNK2	NM_005781	0.0211091	-1.17971
ZNF76	NM_003427	0.0220102	-1.17773
STBD1	NM_003943	0.0345957	-1.17555
ZNF212	NM_012256	0.0306034	-1.17534
PTRF	NM_012232	0.0129322	-1.1736
ATRIP	NM_130384	0.0419372	-1.16934
ZNF32	NM_006973	0.0324977	-1.16815
HSPBAP1	NM_024610	0.0458706	-1.1604
APEX2	NM_014481	0.0164218	-1.15959
WWC3	NM_015691	0.0313099	-1.15147
LEMD3	NM_014319	0.0233182	-1.14482
MED24	NM_014815	0.0416989	-1.14269
MITF	NM_006722	0.0248404	-1.14264
PSMC3	NM_002804	0.0138659	-1.13866
CDH10	NM_006727	0.0459182	-1.1336
TOP3B	NM_003935	0.00216038	-1.1317
GSG2	NM_031965	0.0489406	-1.13073
PLK3	NM_004073	0.00271093	-1.12073
MAPK12	NM_002969	0.0423411	-1.11765
SHISA4	NM_198149	0.0320686	-1.11687
CEP250	NM_007186	0.0311642	-1.11108
SEH1L	NM_031216	0.00411256	-1.1102
RARA	NM_000964	0.0346542	-1.10839
MYH9	NM_002473	0.0309414	-1.10195
FTSJ3	NM_017647	0.0364603	-1.09626
AMPD2	NM_004037	0.0468268	-1.09374
PER2	NM_022817	0.0465106	-1.09362
YY1	NM_003403	0.0361307	-1.09347
PRPF4	NM_004697	0.0180735	-1.09328
KLC4	NM_201523	0.0251192	-1.09009
GAK	NM_005255	0.00717028	-1.07487
COPE	NM_007263	0.0445058	-1.06725
RBED1	NM_032213	0.0102776	-1.05824
UBA1	NM_003334	0.0279196	1.07176
SMURF2	NM_022739	0.0287844	1.07997
PCNXL2	NM_014801	0.0102997	1.08214
TMEM98	NM_015544	0.0184366	1.08719
DPYSL4	NM_006426	0.0244396	1.08868
CHFR	NM_018223	0.0322472	1.09233
ENTPD4	NM_004901	0.019665	1.09399
AMBRA1	NM_017749	0.0103185	1.1
NCOA3	NM_181659	0.0301634	1.10173
EXOSC5	NM_020158	0.0331154	1.10725
AMFR	NM_001144	0.0469809	1.11106
MCAM	NM_006500	0.0399821	1.11259
PPFIA1	NM_003626	0.0408471	1.11499
GIT2	NM_057169	0.0492098	1.1178
TRIM68	NM_018073	0.0265846	1.11864
G6PC3	NM_138387	0.014192	1.12034
RAB6IP1	NM_015213	0.0458814	1.1212
SPECC1L	NM_015330	0.041979	1.12329
NMRAL1	NM_020677	0.0407842	1.12437
PPFIBP1	NM_003622	0.0368332	1.12547
C14orf101	NM_017799	0.04751	1.12936
FLJ14154	NM_024845	0.0176805	1.12993
EPS15L1	NM_021235	0.00680336	1.1364
EML1	NM_001008707	0.0451231	1.13964
SAMD8	NM_144660	0.0379611	1.14159
PIP4K2B	NM_003559	0.0367993	1.14906
PI4KA	NM_058004	0.00477506	1.15062
ACAD10	NM_025247	0.016032	1.15136
NDUFV3	NM_021075	0.0252625	1.15155
ZDHHC5	NM_015457	0.0098109	1.15412
NPC1	NM_000271	0.0404912	1.15494
CYFIP1	NM_014608	0.0425239	1.15957
M-RIP	NM_201274	0.00239468	1.16022
ZDHHC9	NM_016032	0.0206052	1.16412
SERGEF	NM_012139	0.0374692	1.16548
RAB5C	NM_201434	0.0382892	1.16743
CLCN7	NM_001287	0.0254705	1.16838
UBE2E1	NM_003341	0.04906	1.16909
MINK1	NM_153827	0.0289413	1.17073
TMEM104	NM_017728	0.0391507	1.17088
TMEM173	NM_198282	0.0195351	1.17122
SMCR7L	NM_019008	0.0307395	1.17168
TSC22D3	NM_198057	0.0420057	1.17988
MR1	NM_001531	0.0359956	1.1814
AGPAT3	NM_020132	0.0355276	1.18359
DOK4	NM_018110	0.0189448	1.19033
CBL	NM_005188	0.023809	1.19061
AP2A2	NM_012305	0.0187417	1.19081
KIAA1161	NM_020702	0.0484969	1.19235
CD99L2	NM_031462	0.00426884	1.19363
PDE8A	NM_002605	0.042868	1.19471
NDUFB10	NM_004548	0.0054769	1.19496
CCNE1	NM_001238	0.0053151	1.19867
C12orf5	NM_020375	0.0203234	1.19967
LRRC23	NM_201650	0.043068	1.19998
BTRC	NM_033637	0.0376686	1.20014
SEC31B	NM_015490	0.0384668	1.20283
BACE1	NM_012104	0.0121044	1.20819
CENTD2	NM_139181	0.0276145	1.20852
FCER1G	NM_004106	0.0251637	1.20886
CTSD	NM_001909	0.0180866	1.20909
SPATA20	NM_022827	0.0442615	1.20916
GSDML	NM_001042471	0.0336765	1.21062
HECA	NM_016217	0.0358341	1.21063
UROS	NM_000375	0.0296761	1.21447
CHMP1B	NM_020412	0.00831827	1.21495
ABHD14A	NM_015407	0.00274139	1.21572
GFER	NM_005262	0.0321348	1.21789
PML	NM_033240	0.0256626	1.22107
FOXJ2	NM_018416	0.0436177	1.22202
TIAL1	NM_001033925	0.00577739	1.22251
AP1B1	NM_001127	0.0328828	1.22276
SLC38A1	NM_030674	0.0237408	1.22601
ZMAT3	NM_022470	0.0436165	1.22739
PCTP	NM_001102402	0.0301394	1.23971
BRAP	NM_006768	0.0229322	1.23985
MIPEP	NM_005932	0.00734033	1.24048
FEZ1	NM_005103	0.00957834	1.24152
WDR37	NM_014023	0.0171551	1.24968
C14orf143	NM_145231	0.0418585	1.25271
FOXO4	NM_005938	0.0485969	1.25276
TTLL1	NM_001008572	0.023403	1.25351
ZNF559	NM_032497	0.0131994	1.2551
SOX18	NM_018419	0.0201839	1.25675
HPS1	NM_000195	0.0458752	1.25812
CCDC67	NM_181645	0.00932408	1.2612
HRAS	NM_176795	0.0165854	1.26469
MTMR15	NM_014967	0.00587502	1.26788
PNPO	NM_018129	0.00852617	1.26979
FGF14	NM_175929	0.0125577	1.26988
YWHAH	NM_003405	0.0178746	1.27039
ASB17	NM_080868	0.0404439	1.2718
STIM1	NM_003156	0.0239888	1.27738
SLC23A2	NM_005116	0.0260665	1.27823
DHTKD1	NM_018706	0.0266887	1.28124
CYP4V2	NM_207352	0.0256323	1.28705
ARMC2	NM_032131	0.0170872	1.29115
ZNHIT4	NM_031288	0.0183098	1.29198
PTPRS	NM_002850	0.0120453	1.29333
OTUB2	NM_023112	0.0287954	1.29396
CD93	NM_012072	0.0136919	1.29476
SRrp35	NM_080743	0.0144383	1.29609
ETS2	NM_005239	0.031547	1.29616
OSBPL1A	NM_080597	0.0315235	1.29665
ZFYVE21	NM_024071	0.00150942	1.30036
NDRG3	NM_032013	0.000154449	1.30387
PGPEP1	NM_017712	9.75e-05	1.30427
ZNF577	NM_032679	0.0271743	1.30602
FLT4	NM_182925	0.0316765	1.30718
RECK	NM_021111	0.0121714	1.31224
PIK3C2A	NM_002645	0.0225062	1.31333
NADSYN1	NM_018161	0.0244933	1.31333
PI4K2A	NM_018425	0.00134553	1.31353
BCL2L1	NM_138578	0.0434402	1.31459
USP54	NM_152586	0.00722775	1.31641
NUMB	NM_001005743	0.0118311	1.31663
BCL7C	NM_004765	0.00277051	1.31875
SYNE1	NM_182961	0.0367193	1.32779
NAP5	NM_207363	0.0489935	1.32798
AMMECR1	NM_015365	0.0175967	1.33016
TRIM8	NM_030912	0.0370588	1.33625
CCDC6	NM_005436	0.00618745	1.33849
ZNF385D	NM_024697	0.0217789	1.33891
MARK4	NM_031417	0.0313707	1.34196
ICEBERG	NM_021571	0.0117049	1.3437
LRP6	NM_002336	0.0324854	1.34522
GCH1	NM_000161	0.0334364	1.34894
CCDC113	NM_014157	0.00791897	1.35188
ZNF329	NM_024620	0.0247204	1.35411
PGM2L1	NM_173582	0.0107482	1.35934
TRIM35	NM_171982	0.0352581	1.3597
FAM53B	NM_014661	0.0274809	1.35987
RHOBTB1	NM_014836	0.0324354	1.36036
FZD4	NM_012193	0.00797154	1.36183
TRIM69	NM_182985	0.0221192	1.36442
ZADH1	NM_152444	0.0460751	1.36554
FDXR	NM_024417	0.00535609	1.37067
MMP24	NM_006690	0.0426685	1.37672
RPS14	NM_005617	0.0158814	1.37953
ATP1B3	NM_001679	0.0417468	1.38147
MAP3K8	NM_005204	0.0332447	1.38164
CBR3	NM_001236	0.00579057	1.38315
LRRC32	NM_005512	0.0141804	1.38508
CNNM2	NM_017649	0.0327017	1.38763
ARSE	NM_000047	0.0165057	1.38791
PANK1	NM_148977	0.00173876	1.39069
STS	NM_000351	0.00297665	1.39588
RPL24	NM_000986	0.0342609	1.3971
P4HA1	NM_000917	0.0494919	1.40831
TNRC6B	NM_001024843	0.00794248	1.4146
CMTM3	NM_144601	0.0224047	1.41762
TPP1	NM_000391	0.0321803	1.41952
YPEL1	NM_013313	0.0121899	1.41983
PORCN	NM_022825	0.0273245	1.42244
PPM1F	NM_014634	0.00391982	1.42263
ZNF195	NM_007152	0.0117238	1.42289
OR52I2	NM_001005170	0.0171395	1.42907
TSKU	NM_015516	0.0126994	1.43018
SCAMP5	NM_138967	0.0340331	1.43267
AKAP13	NM_006738	0.0409382	1.43873
EXT2	NM_000401	0.00176467	1.44955
WDFY2	NM_052950	0.0375749	1.45135
PROM1	NM_006017	0.0332257	1.45456
CASP12	NR_000035	0.0332739	1.45889
NOSTRIN	NM_001039724	0.0130224	1.46158
ECD	NM_007265	0.0127099	1.462
RIN2	NM_018993	0.01337	1.4647
GNPTAB	NM_024312	0.024096	1.46634
GPR37L1	NM_004767	0.0450507	1.47452
AMOTL1	NM_130847	0.0437911	1.47461
GAMT	NM_138924	0.00288608	1.47466
CYB561	NM_001915	0.0293535	1.47663
LRRC6	NM_012472	0.0373369	1.48175
ERN1	NM_001433	0.0102049	1.48383
FREM1	NM_144966	0.0491914	1.48777
TTC12	NM_017868	0.0198852	1.49179
NCOA2	NM_006540	0.0212728	1.49378
ACYP2	NM_138448	0.0114466	1.494
SH3KBP1	NM_031892	0.00627087	1.49586
GDPD5	NM_030792	0.00601708	1.49592
ZNF667	NM_022103	0.00343878	1.49859
CDR1	NM_004065	0.0346374	1.50837
LIMK2	NM_016733	0.0220819	1.52027
WDR21C	NM_152418	0.0136987	1.52346
IL17RA	NM_014339	0.0403788	1.52756
GRAMD4	NM_015124	0.0437055	1.53151
CDA	NM_001785	0.0483091	1.53553
ARMCX3	NM_016607	0.0128719	1.53879
FOS	NM_005252	0.0379297	1.53944
LPIN2	NM_014646	0.0217377	1.54065
RIOK3	NM_003831	0.0063685	1.54804
KALRN	NM_007064	0.0495344	1.5515
KRTAP4-5	NM_033188	0.047497	1.55288
ADRA2A	NM_000681	0.0258793	1.55797
PPARA	NM_005036	0.0348731	1.5603
C12orf51	NM_001109662	0.0272316	1.56694
ZNF705A	NM_001004328	0.0341039	1.5721
CLCA2	NM_006536	0.0253862	1.57257
CSGALNACT1	NM_018371	0.0259374	1.57472
ARMCX6	NM_019007	0.010833	1.58416
CD82	NM_002231	0.0100161	1.5844
ANKRD46	NM_198401	0.00285789	1.58955
IGFBP3	NM_001013398	0.0241593	1.5914
NOV	NM_002514	0.0470017	1.59556
TCTN1	NM_001082538	0.0119318	1.59984
HOXB7	NM_004502	0.0164603	1.60291
CLDN5	NM_003277	0.0127358	1.60577
ARRB1	NM_004041	0.00549201	1.61382
LOC283514	NM_198849	0.0032469	1.62122
TGFA	NM_003236	0.032947	1.62144
SPZ1	NM_032567	0.000749035	1.62299
CLIC5	NM_001114086	0.0105734	1.62769
TMEM51	NM_018022	0.0228466	1.63023
MTSS1	NM_014751	0.0141008	1.63038
MMP1	NM_002421	0.0292931	1.64013
APOBEC3C	NM_014508	0.0145625	1.64053
PITPNC1	NM_181671	0.00681563	1.64102
LALBA	NM_002289	0.00893664	1.64122
SLC44A2	NM_020428	0.0307546	1.6506
PREX1	NM_020820	0.0455093	1.66694
Gcom1	NM_001018090	0.0229138	1.68214
SLC29A3	NM_018344	0.000920142	1.68681
SLC2A13	NM_052885	0.00949147	1.70033
ST3GAL1	NM_003033	0.0279425	1.70709
C21orf63	NM_058187	0.00795258	1.71027
CTSL1	NM_001912	0.0219456	1.71637
LOC57228	NM_001033873	0.0450018	1.71879
VASH1	NM_014909	0.00122317	1.72871
CETP	NM_000078	0.0298713	1.73708
BCL2A1	NM_001114735	0.0234597	1.73915
RAI2	NM_021785	0.0141607	1.74371
KLHDC7B	NM_138433	0.0131284	1.7449
FDX1	NM_004109	0.0495625	1.74818
SLC9A3R2	NM_004785	0.0360054	1.75921
TAF7L	NM_024885	0.00589589	1.77091
SERPINI1	NM_001122752	0.0354998	1.77375
CYYR1	NM_052954	0.0152319	1.79136
PCDHB14	NM_018934	0.0499399	1.80701
OR1Q1	NM_012364	0.00957976	1.8121
CCDC103	NM_213607	0.0157664	1.82974
ASAH1	NM_177924	0.0371709	1.84653
ABHD3	NM_138340	0.0341509	1.84689
OR2H1	NM_030883	0.0493483	1.84905
CLSTN3	NM_014718	0.00116781	1.8493
ERAF	NM_016633	0.0454589	1.84949
CXCL16	NM_022059	0.0134556	1.85292
HSN2	NM_213655	0.0400651	1.85917
C9orf96	NM_153710	0.045718	1.86617
OR4N5	NM_001004724	0.0407505	1.88248
TMOD2	NM_014548	0.0290686	1.89317
MAP7D2	NM_152780	0.00507564	1.89485
KRTAP26-1	NM_203405	0.0374719	1.89552
ARMCX2	NM_177949	0.018451	1.91695
IFIT3	NM_001031683	0.0312821	1.92271
C18orf17	NM_153211	0.0249595	1.94838
P2RY1	NM_002563	0.0240475	1.949
PTPRM	NM_001105244	0.0104778	1.96754
F3	NM_001993	0.0467158	2.00216
ZDHHC23	NM_173570	0.00975087	2.00909
FLVCR2	NM_017791	0.0395174	2.0182
TMEM117	NM_032256	0.00787165	2.03921
KRTAP4-1	NM_033060	0.0260904	2.05061
FCHSD2	NM_014824	0.0497805	2.05995
KALRN	NM_003947	0.0132681	2.06656
FAM107A	NM_007177	0.0338969	2.08947
ACBD7	NM_001039844	0.00835178	2.09223
RIPK3	NM_006871	0.0320624	2.09874
IGFBP4	NM_001552	0.0289141	2.10648
MTRF1L	NM_019041	0.0253183	2.1171
SSH1	NM_018984	0.0310205	2.18157
GIMAP5	NM_018384	0.0433285	2.20418
SCN3B	NM_018400	0.0258221	2.22104
CFP	NM_002621	0.0263942	2.25354
RHOH	NM_004310	0.0298218	2.27199
LAIR2	NM_002288	0.0153057	2.36882
OR4C12	NM_001005270	0.00741327	2.38538
LRRC4	NM_022143	0.0124094	2.41022
NGFR	NM_002507	0.0244058	2.41517
CCDC144A	NM_014695	0.0109266	2.41641
KITLG	NM_000899	0.0452862	2.44599
MYLK	NM_053025	0.0439442	2.4984
SLITRK6	NM_032229	0.0362588	2.53504
BHLHB3	NM_030762	0.041292	2.57617
FLJ14213	NM_024841	0.0218876	2.58531
WNT11	NM_004626	0.0377639	2.70129
GNA14	NM_004297	0.0461714	2.73775
hCG_1640171	NR_003671	0.00295037	2.7581
NOG	NM_005450	0.0379171	2.77617
ACTA2	NM_001613	0.0139484	2.81983
FAS	NM_000043	0.0148835	2.93169
EXOC3L2	NM_138568	0.0292567	2.94124
HS3ST3B1	NM_006041	0.0200006	3.06089
MYCN	NM_005378	0.0488677	3.18046
GCNT4	NM_016591	0.0258515	3.1828
LGR4	NM_018490	0.0206015	3.31411
AMELY	NM_001143	0.00127913	3.35609
SH3PXD2A	NM_014631	0.038052	3.37492
VAV3	NM_006113	0.0457007	3.50468
IGF1	NM_001111283	0.0389822	3.70596
GABRQ	NM_018558	0.0336621	4.50146
SH3PXD2A	NM_014631	0.0101232	4.52596
LYVE1	NM_006691	0.0199643	4.98819
FLRT3	NM_198391	0.0168845	5.0225
ITGA8	NM_003638	0.0216221	5.02608
IGFBP5	NM_000599	0.00771395	5.05837
DKK2	NM_014421	0.0468693	5.72658
PLVAP	NM_031310	0.0133202	6.08812
LBH	NM_030915	0.0482147	6.91179
HAP1	NM_003949	0.0444485	6.94354
KCNE3	NM_005472	0.0407304	7.92818
SERPINE2	NM_006216	0.0388387	8.40514

## Sheet: HUVEC FLI1 vs Knockdown
Gene Symbol	RefSeq	p-value	Fold-Change
PI4KA	NM_058004	0.000661843	1.26774
M-RIP	NM_201274	0.000698669	1.22809
ENTPD4	NM_004901	0.00117079	1.21782
STS	NM_000351	0.0013605	1.50805
PYCARD	NM_013258	0.00137574	-1.35412
SMURF2	NM_022739	0.00175344	1.18649
CBR3	NM_001236	0.00179713	1.56113
ZDHHC5	NM_015457	0.0018277	1.25543
RPA3	NM_002947	0.00186378	-1.16944
SLC38A1	NM_030674	0.00195942	1.51235
NCOA3	NM_181659	0.00212538	1.23088
BCL7C	NM_004765	0.00216019	1.34414
PI4K2A	NM_018425	0.0023423	1.26547
NFE2L1	NM_003204	0.00238953	1.22699
EED	NM_152991	0.00261861	1.21411
PGPEP1	NM_017712	0.00268708	1.11915
MCAM	NM_006500	0.00272344	1.26486
CD93	NM_012072	0.00292941	1.48928
MFSD9	NM_032718	0.00293508	-1.442
PTGER4	NM_000958	0.00296087	-1.19961
CHFR	NM_018223	0.00301505	1.19266
TIAL1	NM_001033925	0.0033681	1.26236
OTUB2	NM_023112	0.00338837	1.61639
TMEM173	NM_198282	0.00366591	1.29075
HOXB7	NM_004502	0.00382178	2.04445
OR4D10	NM_001004705	0.00382745	-2.08456
C2CD2	NM_015500	0.00385089	1.30295
RND2	NM_005440	0.00399461	-1.63378
GALNT17	NM_001034845	0.00403328	-1.35479
RBED1	NM_032213	0.00413051	1.07585
C1orf177	NM_152607	0.0044696	-1.22548
CLSTN3	NM_014718	0.00499995	1.51626
FEZ1	NM_005103	0.00510751	1.29466
MBL1P1	NR_002724	0.00525624	-1.61094
NPC1	NM_000271	0.00534096	1.30362
PTPRA	NM_002836	0.00543653	1.06653
USP54	NM_152586	0.00564241	1.34264
IDE	NM_004969	0.00573041	1.2254
NDUFB10	NM_004548	0.0058745	1.19086
C12orf5	NM_020375	0.0060361	1.29613
RAB43	NM_198490	0.00609641	-1.24782
SYNJ1	NM_003895	0.00638783	1.63818
SYNGR2	NM_004710	0.00663674	1.57739
PNPO	NM_018129	0.00688782	1.28882
DLAT	NM_001931	0.00697089	1.10387
VPS25	NM_032353	0.00704345	-1.42598
OGFOD1	NM_018233	0.00705497	1.20893
ZSCAN21	NM_145914	0.00705786	-1.31903
B4GALT5	NM_004776	0.007117	1.20524
ARRB1	NM_004041	0.00728627	1.55613
FLJ14154	NM_024845	0.00740704	1.17056
UBA1	NM_003334	0.00748777	1.10814
VASH1	NM_014909	0.00753985	1.39717
NDRG3	NM_032013	0.00758278	1.09963
FGF14	NM_175929	0.00758889	1.31814
POFUT1	NM_015352	0.00795124	1.20625
PITPNC1	NM_181671	0.00809587	1.60289
PPFIBP1	NM_003622	0.00810476	1.2062
PSRC1	NM_001032290	0.00823202	-1.40095
ANKRD46	NM_198401	0.00835846	1.41134
C12orf40	NM_001031748	0.00863326	-1.28698
GPAM	NM_020918	0.00868056	1.22987
MCTS1	NM_014060	0.00874967	-1.19017
TUBGCP2	NM_006659	0.00882408	1.12459
EXT2	NM_000401	0.00887175	1.26942
RIOK3	NM_003831	0.00899074	1.48642
DNAJC5	NM_025219	0.00901419	1.41151
AGPAT3	NM_020132	0.0092788	1.28936
SH3KBP1	NM_031892	0.00929376	1.43369
CD99L2	NM_031462	0.00935225	1.15269
ZNF823	NM_001080493	0.00944752	-1.16347
MTMR15	NM_014967	0.00945343	1.23058
CEP250	NM_007186	0.00949859	-1.16312
ZDHHC9	NM_016032	0.00953696	1.21051
LEAP2	NM_052971	0.0101278	2.64819
NAT2	NM_000015	0.0101316	-1.45402
TRAIP	NM_005879	0.0102062	-1.20253
PIK3C2A	NM_002645	0.0102522	1.41184
CXCL16	NM_022059	0.0102768	1.94895
ORC6L	NM_014321	0.0104242	-1.42818
GIT2	NM_057169	0.0104734	1.19866
ZFYVE21	NM_024071	0.0105001	1.16681
CCDC68	NM_025214	0.0106052	2.39913
SAMD8	NM_144660	0.0111099	1.21383
PPFIA1	NM_003626	0.011143	1.17719
GCH1	NM_000161	0.0112272	1.51993
FZD4	NM_012193	0.0112796	1.32248
SFXN3	NM_030971	0.011586	1.2944
SPATA20	NM_022827	0.0116112	1.33517
OR10A5	NM_178168	0.0117574	-1.7178
TAF7L	NM_024885	0.0121279	1.59238
WDR37	NM_014023	0.0122909	1.27908
RRN3	NM_018427	0.0124614	1.35389
hCG_1640171	NR_003671	0.0125097	1.96808
ZNF777	NM_015694	0.0126654	1.11139
RAB6IP1	NM_015213	0.0128464	1.18666
MITF	NM_006722	0.0128504	-1.17696
CDKN1B	NM_004064	0.0128873	-1.88479
RCAN3	NM_013441	0.0129123	1.29499
SLC31A2	NM_001860	0.0130505	1.34978
DCLRE1C	NM_001033858	0.013087	1.2647
VTI1A	NM_145206	0.0131054	1.42489
SMAD7	NM_005904	0.013241	-1.30428
DNAH8	NM_001371	0.0132946	-1.33919
TOB2	NM_016272	0.0134961	1.25678
ARFGEF2	NM_006420	0.0135513	1.21941
MIPEP	NM_005932	0.0137574	1.19692
RECK	NM_021111	0.0138464	1.29901
AK5	NM_174858	0.0140047	-1.31287
SIPA1	NM_153253	0.0142082	1.24801
PSMF1	NM_178578	0.0143135	1.07285
DOPEY2	NM_005128	0.0143352	1.17007
ABHD14A	NM_015407	0.0145262	1.13007
PKD1L1	NM_138295	0.0146782	1.38187
PPAP2C	NM_003712	0.0147536	-1.30744
SNIP1	NM_024700	0.0148695	-1.17836
DPYSL4	NM_006426	0.0150073	-1.10367
NRIP1	NM_003489	0.0153428	1.35319
DDX53	NM_182699	0.0153667	-1.80594
C14orf143	NM_145231	0.0154784	1.36211
STBD1	NM_003943	0.0157313	-1.23009
LMF2	NM_033200	0.0157494	1.07355
ZNF195	NM_007152	0.0159168	1.38012
TRPV4	NM_021625	0.0160121	1.39014
MAP3K7IP1	NM_006116	0.0160737	-1.29259
DNASE2B	NM_021233	0.0163065	-1.4981
ATP9B	NM_198531	0.0165241	1.25773
MARK2	NM_017490	0.0166279	1.19472
GZMA	NM_006144	0.0167236	1.43791
DNMBP	NM_015221	0.0168041	1.18582
ATL3	NM_015459	0.0168154	1.30739
TBC1D10B	NM_015527	0.0169523	1.34403
RPS14	NM_005617	0.0169659	-1.37082
GPR87	NM_023915	0.0169839	-1.46794
FCGR1A	NM_000566	0.016996	-1.53591
CYSLTR2	NM_020377	0.0170312	-1.56784
PPP1R15A	NM_014330	0.0171034	1.22906
ORC1L	NM_004153	0.0171509	-1.3317
BRAP	NM_006768	0.0177278	1.26202
OR4C15	NM_001001920	0.0180297	3.73112
GDPD5	NM_030792	0.0181358	1.33968
HNRNPD	NM_031370	0.0182995	-1.59439
IL28A	NM_172138	0.0186834	-1.88594
STIM1	NM_003156	0.0188394	1.30191
OR2M7	NM_001004691	0.0191881	-1.6194
AP2A2	NM_012305	0.0192041	1.18927
FAM104A	NM_001098832	0.0192696	1.16439
C21orf63	NM_058187	0.0193285	1.51187
ENG	NM_000118	0.0194733	1.20529
PPM1J	NM_005167	0.0196717	-1.34739
SEC23IP	NM_007190	0.019911	1.16142
OSBPL1A	NM_080597	0.0199758	1.34996
GSS	NM_000178	0.0201698	1.21002
PCDH18	NM_019035	0.0203452	-1.65645
THOC6	NM_024339	0.0208196	-1.33459
ZNF804B	NM_181646	0.0209477	-1.13161
ATG4A	NM_052936	0.0209738	1.68435
RPL24	NM_000986	0.0210049	1.47824
CCNE1	NM_001238	0.0211903	1.12884
KRT84	NM_033045	0.0214028	-1.36227
SMARCA2	NM_003070	0.0215121	1.13333
DMXL2	NM_015263	0.0216898	1.33716
DGKH	NM_178009	0.0217441	1.32736
NLRP11	NM_145007	0.0219205	-1.37387
CRISP1	NM_001131	0.0219279	-1.5516
RAB34	NM_031934	0.0219629	-1.09953
TSR1	NM_018128	0.0220345	1.09481
BACE1	NM_012104	0.0220684	1.17096
ENPEP	NM_001977	0.0221168	-1.4605
CYP27A1	NM_000784	0.0221428	-1.40895
UGT2B7	NM_001074	0.0221892	-2.13431
EEFSEC	NM_021937	0.0222114	-1.18324
NUMB	NM_001005743	0.0222513	1.25537
AMFR	NM_001144	0.0223632	1.14378
NUBP1	NM_002484	0.0224842	-1.19381
LZTR1	NM_006767	0.0225113	1.18764
ZNF470	NM_001001668	0.0225209	1.21193
PTK2	NM_153831	0.0226052	1.18564
CBL	NM_005188	0.0226243	1.19395
ZNF362	NM_152493	0.0226872	-1.26149
SPZ1	NM_032567	0.0229069	1.20613
FAM62A	NM_015292	0.0229991	1.21938
PIP4K2A	NM_005028	0.0230852	1.32891
GSTM5	NM_000851	0.0230977	1.22291
C14orf101	NM_017799	0.0232343	1.16642
GSDML	NM_001042471	0.0233234	1.23989
CIDEA	NM_001279	0.0234831	-1.42217
TRIM35	NM_171982	0.0237907	1.41732
FLJ10490	NM_018111	0.0238521	-1.64068
NOSTRIN	NM_001039724	0.0239253	1.37096
P4HA1	NM_000917	0.0240353	1.54476
HSD17B2	NM_002153	0.0241383	3.27512
CNGA1	NM_000087	0.0241662	-1.38145
EPS15L1	NM_021235	0.0243075	1.09173
TRIP4	NM_016213	0.0244196	1.14317
PML	NM_033240	0.0244289	1.2249
CHMP1B	NM_020412	0.0244981	1.15156
MT1DP	NR_003658	0.024569	-1.6394
ATP8B4	NM_024837	0.0246722	1.95255
HRAS	NM_176795	0.0247918	1.23057
NDNL2	NM_138704	0.0247964	1.4491
CD59	NM_203330	0.0250537	1.25804
CYFIP1	NM_014608	0.0251866	1.19219
PDE8A	NM_002605	0.0253148	1.23551
SLC2A13	NM_052885	0.0254476	1.48404
GFER	NM_005262	0.0255734	1.23631
AP2S1	NM_004069	0.0256882	1.30058
PGM2L1	NM_173582	0.0259533	1.26515
LALBA	NM_002289	0.0260125	1.4328
FLJ25371	NM_152543	0.0260492	-1.93905
SETD4	NM_017438	0.0260713	1.48323
KYNU	NM_003937	0.0261568	-1.39222
PLCD4	NM_032726	0.0262027	-1.24472
PPM1F	NM_014634	0.0263297	1.22451
CLEC9A	NM_207345	0.0263334	-1.26936
PPFIBP2	NM_003621	0.0263357	-1.55878
KIF13B	NM_015254	0.0263904	1.13019
CNKSR3	NM_173515	0.0266648	1.22786
TRIM48	NM_024114	0.0267214	1.5728
PDZD8	NM_173791	0.0271604	1.25529
CCDC6	NM_005436	0.0273565	1.20648
ERN1	NM_001433	0.0275195	1.33951
NPR1	NM_000906	0.0275431	2.58184
AMELY	NM_001143	0.0276542	1.6615
HOXB13	NM_006361	0.0276641	-2.40798
CXorf40A	NM_178124	0.0276851	1.23145
FAS	NM_000043	0.0277442	2.42944
CETP	NM_000078	0.0277952	1.75971
C16orf80	NM_013242	0.0279312	1.14079
AMPD2	NM_004037	0.02794	-1.11228
C12orf51	NM_001109662	0.0279542	1.56109
FAM9C	NM_174901	0.0279642	-1.88659
NLGN4Y	NM_014893	0.0280496	-1.35248
RANGAP1	NM_002883	0.0280587	-1.20675
ASCL3	NM_020646	0.0281625	-1.91978
ZFP28	NM_020828	0.028474	1.27994
EXOSC5	NM_020158	0.0286947	1.11264
UROS	NM_000375	0.0288314	1.21668
GLRA3	NM_006529	0.0288571	-1.2185
LRRC32	NM_005512	0.0288909	1.29898
TOB1	NM_005749	0.0290522	1.41874
ATP1B3	NM_001679	0.0290606	1.4395
ZNF625	NM_145233	0.0290876	1.72549
WFDC13	NM_172005	0.0292147	-1.70114
MED18	NM_017638	0.0293241	-1.32601
TRIM8	NM_030912	0.0294291	1.36703
ZNF695	NM_020394	0.0297117	-1.26408
CHN2	NM_004067	0.0297218	-1.21884
PLEKHM1	NM_014798	0.0297879	1.36579
MOCOS	NM_017947	0.0305976	-1.17697
NDST2	NM_003635	0.0310066	1.15825
LRRC7	NM_020794	0.0310436	-1.31766
IGF2	NM_000612	0.0311549	1.29181
PORCN	NM_022825	0.0313098	1.40109
RABL5	NM_022777	0.0314184	-1.17266
RDH14	NM_020905	0.0314598	-1.13352
TMEM65	NM_194291	0.0316523	-1.24954
SCARB1	NM_005505	0.0318176	1.24519
TNFRSF10B	NM_003842	0.0318809	1.20886
CASP12	NR_000035	0.0318895	1.46662
LOC283767	NM_001001413	0.0319091	-1.99388
SOX17	NM_022454	0.0320626	-1.18452
HSPB1	NM_001540	0.0323412	-1.15351
DOK4	NM_018110	0.0323734	1.1585
PTPRM	NM_001105244	0.0326068	1.61313
CDKN2C	NM_001262	0.0326363	-1.69624
C20orf142	NM_001080472	0.032812	1.46669
SELM	NM_080430	0.0329146	1.51421
MTUS1	NM_001001924	0.0329394	-1.31839
PAFAH1B2	NM_002572	0.0332335	1.11025
ASCC2	NM_032204	0.0334221	1.2042
RPS6KA1	NM_002953	0.0334802	-1.35266
TSPAN8	NM_004616	0.033897	-2.14265
DDR2	NM_001014796	0.033966	1.57844
ACOX1	NM_004035	0.0342706	1.2423
NR2C2AP	NM_176880	0.0344055	-1.24273
SUPV3L1	NM_003171	0.034479	1.25595
HMGA2	NM_003483	0.0346426	-1.52728
CLCN5	NM_000084	0.0348139	1.26416
BFAR	NM_016561	0.0348646	1.19228
NPTN	NM_012428	0.0350044	1.36675
MLZE	NM_031415	0.0351341	1.57017
LOC150763	NM_207328	0.0353792	-1.47287
GOSR2	NM_004287	0.0353902	1.36076
TNKS2	NM_025235	0.0358351	1.34356
TRIM21	NM_003141	0.0358494	1.35116
SBNO1	NM_018183	0.036038	1.32371
GPRC6A	NM_148963	0.0360749	-1.66344
AP1B1	NM_001127	0.0361963	1.21511
C10orf137	NM_015608	0.0362812	1.10291
BST1	NM_004334	0.0363382	2.01586
FRMD4A	NM_018027	0.0365248	1.1678
FAM119B	NM_206914	0.0365565	1.28734
ERO1L	NM_014584	0.0366783	1.21471
NDUFV1	NM_007103	0.0368069	-1.09533
HEMGN	NM_018437	0.0368887	-1.38828
DDX3Y	NM_001122665	0.0369391	1.20849
PIP4K2B	NM_003559	0.0369456	1.14885
ZNFX1	NM_021035	0.0371502	1.30301
NT5DC3	NM_016575	0.0372497	1.21624
APOBEC3F	NM_145298	0.0373888	1.28692
CUGBP1	NM_006560	0.0374753	1.09232
PHYH	NM_006214	0.0375682	1.38416
CDK9	NM_001261	0.0376511	1.1502
RAB6B	NM_016577	0.0377303	1.11319
C1R	NM_001733	0.0377591	-1.26484
C1orf62	NM_152763	0.038044	-1.59711
ZBED4	NM_014838	0.0381076	1.17049
THNSL1	NM_024838	0.0381569	1.35084
MINK1	NM_153827	0.03824	1.1547
TMEM186	NM_015421	0.0382917	-1.19184
FOXJ2	NM_018416	0.0383078	1.23311
SLC23A2	NM_005116	0.0383521	1.24163
HIRA	NM_003325	0.0384416	1.16265
USP5	NM_001098536	0.0387536	1.1486
NMB	NM_021077	0.0388081	-1.73843
MUC15	NM_145650	0.0388468	-1.62454
RRM2B	NM_015713	0.0389502	1.31203
DOCK8	NM_203447	0.0389837	1.78165
SLC29A3	NM_018344	0.0390152	1.19682
PLCXD2	NM_153268	0.0390204	-1.55577
CTSD	NM_001909	0.0390251	1.16018
CCDC144A	NM_014695	0.0390369	1.81195
ARSE	NM_000047	0.0392209	1.28285
HSPC159	NM_014181	0.0393884	-1.14091
FKBP2	NM_004470	0.0396969	-1.20975
APCS	NM_001639	0.0398065	-1.38986
VPS53	NM_018289	0.0400831	1.13076
RPP21	NM_024839	0.0402477	1.09677
LRRC6	NM_012472	0.0405304	1.46596
SPECC1L	NM_015330	0.0405888	1.1248
USP49	NM_018561	0.0406124	-1.14503
ZNF366	NM_152625	0.0406354	1.32436
KIAA1161	NM_020702	0.0407882	1.2053
WDR21A	NM_015604	0.0407948	1.30552
AKAP1	NM_003488	0.0410641	1.25871
RNF167	NM_015528	0.0412068	1.20098
Gcom1	NM_001018090	0.0412137	1.53683
GGA1	NM_013365	0.0413562	1.19046
CD40	NM_001250	0.0416158	1.49226
ATP6AP1	NM_001183	0.0416645	1.2426
STAC	NM_003149	0.0417286	-1.3241
OR6K2	NM_001005279	0.0419329	-1.85957
PRSS12	NM_003619	0.0419504	1.97216
HIST1H2AL	NM_003511	0.0419581	-1.41335
POMT2	NM_013382	0.0421786	1.15954
C4orf32	NM_152400	0.0422086	-1.22064
BICD1	NM_001714	0.0422405	-1.57923
NOC2L	NM_015658	0.0425025	1.14388
B3GALNT2	NM_152490	0.0425563	-1.14106
HERC4	NM_022079	0.0425795	1.20877
WDR34	NM_052844	0.0427395	-1.38745
ANKRD27	NM_032139	0.042864	1.26993
IER3	NM_003897	0.0428689	-1.28749
ARMCX3	NM_016607	0.0429007	1.34314
IRF2BP2	NM_182972	0.0430819	-1.16688
MYOZ2	NM_016599	0.043162	2.07009
PLXNA2	NM_025179	0.0433593	1.24603
ARHGAP21	NM_020824	0.0434018	1.80238
SRrp35	NM_080743	0.0435303	-1.2005
KLHDC7B	NM_138433	0.0435375	1.46425
SULF2	NM_018837	0.0436148	1.43067
TTC3	NM_003316	0.0436771	1.25639
LPIN2	NM_014646	0.0437163	1.41101
YY1	NM_003403	0.0437694	-1.08736
GNPTAB	NM_024312	0.0438824	1.36955
CASP5	NM_004347	0.0439148	1.37273
POF1B	NM_024921	0.0442508	-1.19154
UTP14A	NM_006649	0.0444756	1.30642
C1orf213	NM_138479	0.0447966	-1.15582
CTSA	NM_000308	0.0450714	1.23352
DGKE	NM_003647	0.0452061	1.41737
GAMT	NM_138924	0.045343	1.18721
TK1	NM_003258	0.0455635	-1.3706
RFFL	NM_057178	0.0455842	1.18811
TCTN3	NM_015631	0.0456007	1.39362
STYX	NM_145251	0.0456738	1.19472
HNF4G	NM_004133	0.0457353	-1.61338
CDH12	NM_004061	0.0458344	-1.34015
C12orf60	NM_175874	0.0459304	1.74382
IFIT3	NM_001031683	0.0462848	1.77392
ZNF660	NM_173658	0.0463484	-1.4762
IRAK4	NM_001114182	0.0464274	1.30268
COLEC10	NM_006438	0.0464741	1.43192
CPD	NM_001304	0.0465335	1.21216
HSN2	NM_213655	0.0466937	1.80116
BCL2A1	NM_001114735	0.0470421	1.55296
DUSP14	NM_007026	0.0471221	1.61147
TAOK3	NM_016281	0.0471802	1.22957
S100B	NM_006272	0.0476912	-1.70325
SEPT6	NM_145799	0.0479255	1.4728
IL17RA	NM_014339	0.0481806	1.48988
PRPF19	NM_014502	0.0486793	1.22821
CCDC113	NM_014157	0.0488062	1.18711
EEA1	NM_003566	0.0488398	1.42286
CHSY3	NM_175856	0.04905	1.63795
NDUFV3	NM_021075	0.0499348	1.11908
