# Supplementary material for: Tumor-specific retargeting of an oncogenic transcription factor chimera results in dysregulation of chromatin and transcription
Source: HighWire-hosted journal article supplement (doi:10.1101/gr.125666.111), 2011-11-15
Supplement: PatelSimon_TableS4.xlsx [file PatelSimon_TableS4.xlsx]

## Sheet: Legend
Patel and Simon Supplementary Table 4. Closest Differentially Expressed Genes to Binding Sites
Experiment Name	Cell Type	Factor Silenced	Factor Expressed
EWS502_EWS-FLI	EWS502	EWS-FLI	EWS-FLI
EWS502_FLI1	EWS502	EWS-FLI	FLI1
HUVEC_EWS-FLI	HUVEC	FLI1	EWS-FLI
HUVEC_FLI1	HUVEC	FLI1	FLI1

## Sheet: EWS502_EWS-FLI
Peak_chr	Peak_start	Peak_stop	Nearest_DifferentiallyExpressed_RefSeqID	Nearest_DifferentiallyExpressed_GeneSymbol	Nearest_DifferentiallyExpressed_RefSeq_chr	Nearest_DifferentiallyExpressed_RefSeq_TSS	Distance_PeakMidpoint_TSS_bp
chr10	159446	159692	NM_015155	LARP4B	chr10	921702	762133
chr10	168682	169113	NM_015155	LARP4B	chr10	921702	752804
chr10	362288	362681	NM_015155	LARP4B	chr10	921702	559217
chr10	811902	812151	NM_015155	LARP4B	chr10	921702	109675
chr10	1541000	1541813	NM_004508	IDI1	chr10	1085061	456346
chr10	1738929	1739278	NM_004508	IDI1	chr10	1085061	654043
chr10	1879852	1880251	NM_004508	IDI1	chr10	1085061	794991
chr10	1923147	1923522	NM_004508	IDI1	chr10	1085061	838274
chr10	2051459	2051660	NM_004508	IDI1	chr10	1085061	966499
chr10	2175352	2176067	NM_002627	PFKP	chr10	3099751	924041
chr10	2210975	2211339	NM_002627	PFKP	chr10	3099751	888594
chr10	2634128	2634503	NM_002627	PFKP	chr10	3099751	465435
chr10	2701956	2702086	NM_002627	PFKP	chr10	3099751	397730
chr10	2889029	2889443	NM_002627	PFKP	chr10	3099751	210515
chr10	2981327	2982162	NM_002627	PFKP	chr10	3099751	118006
chr10	3271611	3272520	NM_002627	PFKP	chr10	3099751	172315
chr10	3315326	3315704	NM_002627	PFKP	chr10	3099751	215764
chr10	3360582	3361119	NM_002627	PFKP	chr10	3099751	261100
chr10	3423563	3424154	NM_002627	PFKP	chr10	3099751	324108
chr10	3456515	3457008	NM_002627	PFKP	chr10	3099751	357011
chr10	3487647	3488066	NM_002627	PFKP	chr10	3099751	388106
chr10	3651593	3652119	NM_002627	PFKP	chr10	3099751	552105
chr10	3791505	3792033	NM_002627	PFKP	chr10	3099751	692018
chr10	3792877	3793233	NM_002627	PFKP	chr10	3099751	693304
chr10	4724250	4724638	NM_205845	AKR1C2	chr10	5050207	325763
chr10	5073334	5073744	NM_205845	AKR1C2	chr10	5050207	23332
chr10	5605152	5605558	NM_024701	ASB13	chr10	5748564	143209
chr10	5684133	5684562	NM_024701	ASB13	chr10	5748564	64216
chr10	5686639	5687005	NM_024701	ASB13	chr10	5748564	61742
chr10	6168172	6168726	NM_017782	C10orf18	chr10	5766806	401643
chr10	6170673	6171056	NM_017782	C10orf18	chr10	5766806	404059
chr10	6301159	6301502	NM_017782	C10orf18	chr10	5766806	534525
chr10	6361356	6361769	NM_017782	C10orf18	chr10	5766806	594757
chr10	6389296	6389666	NM_017782	C10orf18	chr10	5766806	622675
chr10	8378798	8379145	NM_017782	C10orf18	chr10	5766806	2612166
chr10	8427632	8428089	NM_017782	C10orf18	chr10	5766806	2661055
chr10	8564495	8564689	NM_017782	C10orf18	chr10	5766806	2797786
chr10	8595302	8595514	NM_017782	C10orf18	chr10	5766806	2828602
chr10	8607492	8607843	NM_017782	C10orf18	chr10	5766806	2840862
chr10	10995582	10996233	NM_031455	CCDC3	chr10	13083710	2087802
chr10	11736112	11736484	NM_031455	CCDC3	chr10	13083710	1347412
chr10	11744126	11744474	NM_031455	CCDC3	chr10	13083710	1339410
chr10	11745622	11746749	NM_031455	CCDC3	chr10	13083710	1337524
chr10	11762080	11762472	NM_031455	CCDC3	chr10	13083710	1321434
chr10	11880846	11881266	NM_031455	CCDC3	chr10	13083710	1202654
chr10	11896081	11896435	NM_031455	CCDC3	chr10	13083710	1187452
chr10	12172234	12172502	NM_031455	CCDC3	chr10	13083710	911342
chr10	12301765	12302824	NM_031455	CCDC3	chr10	13083710	781415
chr10	12623698	12624078	NM_031455	CCDC3	chr10	13083710	459822
chr10	13068989	13069356	NM_031455	CCDC3	chr10	13083710	14537
chr10	13439105	13439263	NM_012247	SEPHS1	chr10	13430286	8898
chr10	13960638	13961042	NM_152751	BEND7	chr10	13584982	375858
chr10	14491883	14492297	NM_018027	FRMD4A	chr10	14412872	79218
chr10	14698961	14699416	NM_024670	SUV39H2	chr10	14960904	261715
chr10	15467974	15468427	NM_004808	NMT2	chr10	15250701	217500
chr10	15942185	15942631	NM_004808	NMT2	chr10	15250701	691707
chr10	16824409	16825025	NM_014241	PTPLA	chr10	17699379	874662
chr10	16945000	16945376	NM_014241	PTPLA	chr10	17699379	754191
chr10	17111552	17111939	NM_014241	PTPLA	chr10	17699379	587633
chr10	18465986	18466205	NM_201571	CACNB2	chr10	18469747	3651
chr10	19246437	19246619	NM_178815	ARL5B	chr10	18988318	258210
chr10	19308977	19309513	NM_178815	ARL5B	chr10	18988318	320927
chr10	20260494	20261118	NM_032812	PLXDC2	chr10	20145377	115429
chr10	20262672	20262887	NM_032812	PLXDC2	chr10	20145377	117403
chr10	20343044	20343596	NM_032812	PLXDC2	chr10	20145377	197943
chr10	20372872	20373238	NM_032812	PLXDC2	chr10	20145377	227678
chr10	20475051	20475651	NM_032812	PLXDC2	chr10	20145377	329974
chr10	20490915	20491383	NM_032812	PLXDC2	chr10	20145377	345772
chr10	20557407	20557794	NM_032812	PLXDC2	chr10	20145377	412224
chr10	20738413	20738834	NM_032812	PLXDC2	chr10	20145377	593247
chr10	20772100	20772688	NM_032812	PLXDC2	chr10	20145377	627017
chr10	20933648	20934018	NM_032812	PLXDC2	chr10	20145377	788456
chr10	21454470	21455373	NM_207371	C10orf140	chr10	21854617	399695
chr10	21752331	21752714	NM_207371	C10orf140	chr10	21854617	102094
chr10	21773203	21773616	NM_207371	C10orf140	chr10	21854617	81207
chr10	22586951	22587855	NM_207371	C10orf140	chr10	21854617	732786
chr10	22591903	22592282	NM_207371	C10orf140	chr10	21854617	737476
chr10	22928751	22929132	NM_012228	MSRB2	chr10	23424432	495490
chr10	22946449	22946822	NM_012228	MSRB2	chr10	23424432	477796
chr10	23485634	23486183	NM_012228	MSRB2	chr10	23424432	61477
chr10	23778139	23778347	NM_012228	MSRB2	chr10	23424432	353811
chr10	23804335	23804718	NM_012228	MSRB2	chr10	23424432	380095
chr10	23847267	23847661	NM_012228	MSRB2	chr10	23424432	423032
chr10	23869344	23869760	NM_012228	MSRB2	chr10	23424432	445120
chr10	23986666	23986975	NM_019590	KIAA1217	chr10	24537725	550904
chr10	24663185	24663555	NM_019590	KIAA1217	chr10	24537725	125645
chr10	24719278	24719669	NM_019590	KIAA1217	chr10	24537725	181749
chr10	25458013	25458561	NM_019590	KIAA1217	chr10	24537725	920562
chr10	25572623	25572929	NM_019590	KIAA1217	chr10	24537725	1035051
chr10	25836622	25836995	NM_014317	PDSS1	chr10	27026600	1189791
chr10	26053286	26053646	NM_014317	PDSS1	chr10	27026600	973134
chr10	26073543	26073744	NM_014317	PDSS1	chr10	27026600	952956
chr10	26095520	26096113	NM_014317	PDSS1	chr10	27026600	930783
chr10	26177149	26177538	NM_014317	PDSS1	chr10	27026600	849256
chr10	26584422	26584833	NM_014317	PDSS1	chr10	27026600	441972
chr10	27004885	27005070	NM_014317	PDSS1	chr10	27026600	21622
chr10	27571820	27572543	NM_032844	MASTL	chr10	27483758	88424
chr10	27676060	27676419	NM_032844	MASTL	chr10	27483758	192482
chr10	27775393	27775766	NM_032844	MASTL	chr10	27483758	291822
chr10	28015130	28015535	NM_032844	MASTL	chr10	27483758	531575
chr10	28644086	28644467	NM_032844	MASTL	chr10	27483758	1160519
chr10	28821255	28821471	NM_021738	SVIL	chr10	29963907	1142544
chr10	28823953	28824333	NM_021738	SVIL	chr10	29963907	1139764
chr10	28826619	28826839	NM_021738	SVIL	chr10	29963907	1137178
chr10	29046798	29047179	NM_021738	SVIL	chr10	29963907	916918
chr10	29068945	29069320	NM_021738	SVIL	chr10	29963907	894774
chr10	29141609	29142022	NM_021738	SVIL	chr10	29963907	822091
chr10	29454460	29454830	NM_021738	SVIL	chr10	29963907	509262
chr10	29531096	29531513	NM_021738	SVIL	chr10	29963907	432602
chr10	29532443	29532828	NM_021738	SVIL	chr10	29963907	431271
chr10	29570617	29571011	NM_021738	SVIL	chr10	29963907	393093
chr10	29583475	29583877	NM_021738	SVIL	chr10	29963907	380231
chr10	29759838	29760162	NM_021738	SVIL	chr10	29963907	203907
chr10	30178300	30178836	NM_021738	SVIL	chr10	29963907	214661
chr10	30236237	30236805	NM_021738	SVIL	chr10	29963907	272614
chr10	30257114	30257454	NM_021738	SVIL	chr10	29963907	293377
chr10	30312684	30312989	NM_021738	SVIL	chr10	29963907	348930
chr10	30402455	30402673	NM_005204	MAP3K8	chr10	30762871	360307
chr10	30782557	30783267	NM_005204	MAP3K8	chr10	30762871	20041
chr10	30804456	30804816	NM_005204	MAP3K8	chr10	30762871	41765
chr10	32468221	32468595	NM_030751	ZEB1	chr10	31648106	820302
chr10	32569732	32570112	NM_030751	ZEB1	chr10	31648106	921816
chr10	32581314	32581707	NM_030751	ZEB1	chr10	31648106	933405
chr10	32729784	32730157	NM_003873	NRP1	chr10	33663839	933868
chr10	33353158	33353313	NM_003873	NRP1	chr10	33663839	310603
chr10	33525489	33525793	NM_003873	NRP1	chr10	33663839	138198
chr10	33642604	33642965	NM_003873	NRP1	chr10	33663839	21054
chr10	33690926	33691318	NM_003873	NRP1	chr10	33663839	27283
chr10	34061715	34062063	NM_003873	NRP1	chr10	33663839	398050
chr10	34246378	34246751	NM_003873	NRP1	chr10	33663839	582726
chr10	34259920	34260130	NM_003873	NRP1	chr10	33663839	596186
chr10	34965524	34965919	NM_019619	PARD3	chr10	35143929	178207
chr10	35109768	35110210	NM_019619	PARD3	chr10	35143929	33940
chr10	35242541	35242864	NM_019619	PARD3	chr10	35143929	98774
chr10	35251162	35251379	NM_019619	PARD3	chr10	35143929	107342
chr10	35350580	35350681	NM_019619	PARD3	chr10	35143929	206702
chr10	35598077	35598375	NM_031866	FZD8	chr10	35970368	372142
chr10	35924106	35924592	NM_031866	FZD8	chr10	35970368	46019
chr10	35981014	35981400	NM_031866	FZD8	chr10	35970368	10839
chr10	36050430	36050841	NM_031866	FZD8	chr10	35970368	80268
chr10	36158100	36158499	NM_031866	FZD8	chr10	35970368	187932
chr10	36200958	36201286	NM_031866	FZD8	chr10	35970368	230754
chr10	36288620	36289046	NM_031866	FZD8	chr10	35970368	318465
chr10	36322967	36323554	NM_031866	FZD8	chr10	35970368	352893
chr10	36540569	36540925	NM_031866	FZD8	chr10	35970368	570379
chr10	36596254	36596540	NM_031866	FZD8	chr10	35970368	626029
chr10	36963880	36964235	NM_031866	FZD8	chr10	35970368	993690
chr10	36965376	36965750	NM_031866	FZD8	chr10	35970368	995195
chr10	37054589	37055154	NM_031866	FZD8	chr10	35970368	1084504
chr10	37138219	37138623	NM_031866	FZD8	chr10	35970368	1168053
chr10	37433154	37433549	NM_031866	FZD8	chr10	35970368	1462984
chr10	38186181	38186612	NM_031866	FZD8	chr10	35970368	2216029
chr10	42834845	42835239	NM_000609	CXCL12	chr10	44200551	1365509
chr10	42860054	42860434	NM_000609	CXCL12	chr10	44200551	1340307
chr10	42909521	42909943	NM_000609	CXCL12	chr10	44200551	1290819
chr10	44465432	44465800	NM_000609	CXCL12	chr10	44200551	265065
chr10	44729229	44729626	NM_032023	RASSF4	chr10	44775224	45796
chr10	48184325	48184700	NM_000124	ERCC6	chr10	50417153	2232640
chr10	49898615	49898840	NM_000124	ERCC6	chr10	50417153	518425
chr10	50525648	50526097	NM_003055	SLC18A3	chr10	50488352	37521
chr10	54500786	54501793	NM_012242	DKK1	chr10	53744046	757244
chr10	56127366	56127575	NM_032997	ZWINT	chr10	57791040	1663569
chr10	56507103	56507313	NM_032997	ZWINT	chr10	57791040	1283832
chr10	57359042	57359564	NM_032997	ZWINT	chr10	57791040	431737
chr10	59609925	59610314	NM_005436	CCDC6	chr10	61336824	1726704
chr10	60672959	60673373	NM_005436	CCDC6	chr10	61336824	663658
chr10	60861980	60862407	NM_005436	CCDC6	chr10	61336824	474630
chr10	60892606	60892994	NM_005436	CCDC6	chr10	61336824	444024
chr10	61811018	61811470	NM_020987	ANK3	chr10	61819494	8250
chr10	62197470	62197866	NM_014836	RHOBTB1	chr10	62374039	176371
chr10	62272482	62273003	NM_014836	RHOBTB1	chr10	62374039	101296
chr10	62429574	62430206	NM_014836	RHOBTB1	chr10	62374039	55851
chr10	62602357	62602794	NM_014836	RHOBTB1	chr10	62374039	228537
chr10	62781806	62782200	NM_178505	TMEM26	chr10	62883214	101211
chr10	62820736	62821099	NM_178505	TMEM26	chr10	62883214	62296
chr10	62907620	62908004	NM_178505	TMEM26	chr10	62883214	24598
chr10	62921392	62921500	NM_178505	TMEM26	chr10	62883214	38232
chr10	63329852	63330238	NM_178505	TMEM26	chr10	62883214	446831
chr10	63519088	63519279	NM_178505	TMEM26	chr10	62883214	635970
chr10	63625180	63625573	NM_178505	TMEM26	chr10	62883214	742163
chr10	63873746	63874163	NM_178505	TMEM26	chr10	62883214	990741
chr10	64046061	64046453	NM_032776	JMJD1C	chr10	64895728	849471
chr10	64122817	64123199	NM_032776	JMJD1C	chr10	64895728	772720
chr10	64158813	64159252	NM_032776	JMJD1C	chr10	64895728	736695
chr10	64335573	64335920	NM_032776	JMJD1C	chr10	64895728	559981
chr10	64407479	64407728	NM_032776	JMJD1C	chr10	64895728	488124
chr10	65057559	65058016	NM_032776	JMJD1C	chr10	64895728	162060
chr10	65071787	65071973	NM_032776	JMJD1C	chr10	64895728	176152
chr10	65120726	65121066	NM_032776	JMJD1C	chr10	64895728	225168
chr10	66039340	66039724	NM_032776	JMJD1C	chr10	64895728	1143804
chr10	66719761	66720124	NM_032776	JMJD1C	chr10	64895728	1824215
chr10	67437431	67437814	NM_032578	MYPN	chr10	69539255	2101632
chr10	67695698	67696081	NM_032578	MYPN	chr10	69539255	1843365
chr10	69249359	69249734	NM_032578	MYPN	chr10	69539255	289708
chr10	69548492	69548878	NM_032578	MYPN	chr10	69539255	9430
chr10	70051795	70052169	NM_004728	DDX21	chr10	70385897	333915
chr10	71080736	71081147	NM_021129	PPA1	chr10	71663196	582254
chr10	71365895	71366123	NM_021129	PPA1	chr10	71663196	297187
chr10	71417398	71417765	NM_021129	PPA1	chr10	71663196	245614
chr10	71470831	71471216	NM_021129	PPA1	chr10	71663196	192172
chr10	71761197	71761687	NM_021129	PPA1	chr10	71663196	98246
chr10	72832925	72833284	NM_022124	CDH23	chr10	72826696	6409
chr10	72855027	72855455	NM_022124	CDH23	chr10	72826696	28545
chr10	72866297	72866770	NM_022124	CDH23	chr10	72826696	39838
chr10	73698594	73698965	NM_002778	PSAP	chr10	73281088	417692
chr10	74457472	74457804	NM_015190	DNAJC9	chr10	74677031	219393
chr10	74618434	74618743	NM_015190	DNAJC9	chr10	74677031	58442
chr10	75685572	75686256	NM_014000	VCL	chr10	75427877	258037
chr10	75729902	75730080	NM_014000	VCL	chr10	75427877	302114
chr10	75868825	75869434	NM_012330	MYST4	chr10	76256384	387254
chr10	76132213	76132311	NM_012330	MYST4	chr10	76256384	124122
chr10	76499698	76500060	NM_144660	SAMD8	chr10	76541472	41593
chr10	79307520	79307991	NM_004747	DLG5	chr10	79356354	48598
chr10	79543141	79543529	NM_004747	DLG5	chr10	79356354	186981
chr10	79567262	79567487	NM_004747	DLG5	chr10	79356354	211021
chr10	79706001	79706185	NM_004747	DLG5	chr10	79356354	349739
chr10	79707521	79707900	NM_004747	DLG5	chr10	79356354	351357
chr10	79831678	79832080	NM_004747	DLG5	chr10	79356354	475525
chr10	79981308	79981629	NM_004747	DLG5	chr10	79356354	625115
chr10	80042864	80043050	NM_004747	DLG5	chr10	79356354	686603
chr10	80426130	80426486	NM_005729	PPIF	chr10	80777225	350917
chr10	80532887	80533223	NM_005729	PPIF	chr10	80777225	244170
chr10	80544205	80544648	NM_005729	PPIF	chr10	80777225	232798
chr10	82821904	82822362	NM_032333	C10orf58	chr10	82158221	663912
chr10	82822949	82823332	NM_032333	C10orf58	chr10	82158221	664920
chr10	84047897	84048217	NM_032333	C10orf58	chr10	82158221	1889836
chr10	85158135	85158499	NM_032333	C10orf58	chr10	82158221	3000096
chr10	88497387	88497943	NM_004670	PAPSS2	chr10	89409455	911790
chr10	88807472	88808045	NM_004670	PAPSS2	chr10	89409455	601696
chr10	90631093	90631421	NM_144590	ANKRD22	chr10	90601712	29545
chr10	90701560	90701941	NM_001613	ACTA2	chr10	90702560	809
chr10	90736288	90736682	NM_000043	FAS	chr10	90740267	3782
chr10	91504832	91505311	NM_001548	IFIT1	chr10	91142301	362771
chr10	92886867	92887247	NR_002779	NUDT9P1	chr10	92902817	15760
chr10	94449308	94449736	NM_014912	CPEB3	chr10	94040824	408698
chr10	95954446	95954686	NM_001776	ENTPD1	chr10	97505662	1551096
chr10	97871157	97871501	NM_013314	BLNK	chr10	98021323	149994
chr10	97925455	97925841	NM_013314	BLNK	chr10	98021323	95675
chr10	98346843	98347233	NM_013314	BLNK	chr10	98021323	325715
chr10	98551128	98551551	NM_032900	ARHGAP19	chr10	99042403	491063
chr10	98662164	98662542	NM_032900	ARHGAP19	chr10	99042403	380050
chr10	100083336	100083742	NM_000195	HPS1	chr10	100196694	113155
chr10	100099335	100099664	NM_000195	HPS1	chr10	100196694	97194
chr10	100135905	100136279	NM_000195	HPS1	chr10	100196694	60602
chr10	100544609	100544923	NM_000195	HPS1	chr10	100196694	348072
chr10	101221194	101221542	NM_002079	GOT1	chr10	101180520	40848
chr10	102064368	102065102	NM_005063	SCD	chr10	102096761	32026
chr10	102071483	102071842	NM_005063	SCD	chr10	102096761	25098
chr10	102168170	102168508	NM_005063	SCD	chr10	102096761	71578
chr10	102636710	102637127	NM_021830	C10orf2	chr10	102737282	100363
chr10	102837564	102837978	NM_021830	C10orf2	chr10	102737282	100489
chr10	102913219	102913549	NM_021830	C10orf2	chr10	102737282	176102
chr10	102966138	102966460	NM_021830	C10orf2	chr10	102737282	229017
chr10	103066504	103066941	NM_013274	POLL	chr10	103337963	271240
chr10	103235711	103236418	NM_013274	POLL	chr10	103337963	101898
chr10	104361779	104361962	NM_178858	SFXN2	chr10	104464287	102416
chr10	104535584	104536007	NM_178858	SFXN2	chr10	104464287	71509
chr10	104551749	104552136	NM_178858	SFXN2	chr10	104464287	87656
chr10	104639202	104639430	NM_178858	SFXN2	chr10	104464287	175029
chr10	105545589	105545928	NM_014631	SH3PXD2A	chr10	105605154	59395
chr10	105755442	105755991	NM_014631	SH3PXD2A	chr10	105605154	150563
chr10	107614473	107614869	NM_052918	SORCS1	chr10	108914282	1299611
chr10	108300788	108301157	NM_052918	SORCS1	chr10	108914282	613309
chr10	108925787	108926163	NM_052918	SORCS1	chr10	108914282	11693
chr10	108981724	108982227	NM_052918	SORCS1	chr10	108914282	67694
chr10	109819778	109820152	NM_052918	SORCS1	chr10	108914282	905683
chr10	110271458	110271946	NM_052918	SORCS1	chr10	108914282	1357420
chr10	110344009	110344423	NM_052918	SORCS1	chr10	108914282	1429934
chr10	110941211	110941582	NM_052918	SORCS1	chr10	108914282	2027115
chr10	110990139	110990523	NM_052918	SORCS1	chr10	108914282	2076049
chr10	111136287	111136636	NM_052918	SORCS1	chr10	108914282	2222180
chr10	111668503	111668727	NM_052918	SORCS1	chr10	108914282	2754333
chr10	111692096	111692245	NM_052918	SORCS1	chr10	108914282	2777889
chr10	112283709	112283861	NM_030756	TCF7L2	chr10	114699998	2416213
chr10	112285766	112286188	NM_030756	TCF7L2	chr10	114699998	2414021
chr10	114138892	114139327	NM_030756	TCF7L2	chr10	114699998	560888
chr10	114196610	114196998	NM_030756	TCF7L2	chr10	114699998	503194
chr10	114652487	114652854	NM_030756	TCF7L2	chr10	114699998	47327
chr10	114843539	114843919	NM_030756	TCF7L2	chr10	114699998	143731
chr10	115276914	115277347	NM_033338	CASP7	chr10	115429415	152284
chr10	115735699	115735935	NM_033338	CASP7	chr10	115429415	306402
chr10	115899380	115899725	NM_033338	CASP7	chr10	115429415	470138
chr10	116262604	116262815	NM_033338	CASP7	chr10	115429415	833295
chr10	116467556	116468073	NM_033338	CASP7	chr10	115429415	1038400
chr10	116753907	116754753	NM_033338	CASP7	chr10	115429415	1324915
chr10	117123796	117124203	NM_025015	HSPA12A	chr10	118492075	1368075
chr10	117277455	117277733	NM_025015	HSPA12A	chr10	118492075	1214481
chr10	117688547	117689192	NM_025015	HSPA12A	chr10	118492075	803205
chr10	118322479	118322918	NM_025015	HSPA12A	chr10	118492075	169376
chr10	118821104	118821632	NM_025015	HSPA12A	chr10	118492075	329293
chr10	118840245	118840475	NM_025015	HSPA12A	chr10	118492075	348285
chr10	118884172	118884587	NM_025015	HSPA12A	chr10	118492075	392305
chr10	119226338	119226636	NM_025015	HSPA12A	chr10	118492075	734412
chr10	119252841	119253332	NM_025015	HSPA12A	chr10	118492075	761012
chr10	119269314	119269788	NM_025015	HSPA12A	chr10	118492075	777476
chr10	119580337	119580811	NM_025015	HSPA12A	chr10	118492075	1088499
chr10	119997877	119998094	NM_199461	NANOS1	chr10	120779217	781231
chr10	120119243	120119724	NM_199461	NANOS1	chr10	120779217	659733
chr10	120127966	120128351	NM_199461	NANOS1	chr10	120779217	651058
chr10	120131397	120131934	NM_199461	NANOS1	chr10	120779217	647551
chr10	120215108	120215408	NM_199461	NANOS1	chr10	120779217	563959
chr10	120778094	120778313	NM_199461	NANOS1	chr10	120779217	1013
chr10	121094213	121094443	NM_005308	GRK5	chr10	120957186	137142
chr10	121095859	121096241	NM_005308	GRK5	chr10	120957186	138864
chr10	121370243	121370658	NM_004281	BAG3	chr10	121400871	30420
chr10	121536923	121537432	NM_024834	C10orf119	chr10	121622384	85206
chr10	121702973	121703344	NM_024834	C10orf119	chr10	121622384	80775
chr10	122485858	122486442	NM_024834	C10orf119	chr10	121622384	863766
chr10	123396109	123396355	NM_017615	NSMCE4A	chr10	123724733	328501
chr10	126019540	126019956	NM_145235	FANK1	chr10	127575097	1555349
chr10	126033228	126034144	NM_145235	FANK1	chr10	127575097	1541411
chr10	127305337	127305722	NM_145235	FANK1	chr10	127575097	269567
chr10	127307016	127307448	NM_145235	FANK1	chr10	127575097	267865
chr10	127574133	127574515	NM_145235	FANK1	chr10	127575097	773
chr10	127575350	127575583	NM_145235	FANK1	chr10	127575097	370
chr10	127722153	127722375	NM_145235	FANK1	chr10	127575097	147167
chr10	127914997	127915392	NM_145235	FANK1	chr10	127575097	340098
chr10	130135418	130135786	NM_002417	MKI67	chr10	129814458	321144
chr10	130468994	130469585	NM_002417	MKI67	chr10	129814458	654832
chr10	130719783	130720255	NM_002417	MKI67	chr10	129814458	905561
chr10	130854010	130854457	NM_002417	MKI67	chr10	129814458	1039776
chr10	130856422	130857103	NM_002417	MKI67	chr10	129814458	1042305
chr10	130982343	130982717	NM_002417	MKI67	chr10	129814458	1168072
chr10	130993432	130993655	NM_002417	MKI67	chr10	129814458	1179086
chr10	131016760	131017435	NM_002417	MKI67	chr10	129814458	1202640
chr10	131030703	131031166	NM_002417	MKI67	chr10	129814458	1216477
chr10	131185327	131185661	NM_002417	MKI67	chr10	129814458	1371036
chr10	131348271	131348574	NM_002417	MKI67	chr10	129814458	1533965
chr10	131638334	131638795	NM_002417	MKI67	chr10	129814458	1824107
chr10	132236606	132236904	NM_030626	LRRC27	chr10	133995603	1758848
chr10	132445132	132445555	NM_030626	LRRC27	chr10	133995603	1550259
chr10	132546932	132547631	NM_030626	LRRC27	chr10	133995603	1448321
chr10	132659674	132660029	NM_030626	LRRC27	chr10	133995603	1335751
chr10	133705484	133705901	NM_030626	LRRC27	chr10	133995603	289910
chr10	134251699	134252241	NM_030626	LRRC27	chr10	133995603	256367
chr10	134330851	134331532	NM_030626	LRRC27	chr10	133995603	335589
chr10	134756083	134756384	NM_030626	LRRC27	chr10	133995603	760631
chr11	887131	887620	NM_004357	CD151	chr11	822951	64425
chr11	1034246	1034655	NM_004357	CD151	chr11	822951	211500
chr11	4075953	4076359	NM_001033	RRM1	chr11	4072499	3657
chr11	5202686	5202847	NM_001005173	OR52L1	chr11	5964791	762024
chr11	5533079	5533460	NM_001005173	OR52L1	chr11	5964791	431521
chr11	6362929	6363534	NM_000543	SMPD1	chr11	6368230	4998
chr11	7650380	7650677	NM_001004684	OR2D3	chr11	6898808	751721
chr11	7772960	7773554	NM_001004684	OR2D3	chr11	6898808	874449
chr11	8274344	8274691	NM_005418	ST5	chr11	8889074	614556
chr11	8666745	8667326	NM_005418	ST5	chr11	8889074	222038
chr11	8793066	8793408	NM_005418	ST5	chr11	8889074	95837
chr11	9134865	9135262	NM_020644	TMEM9B	chr11	8942565	192499
chr11	9455091	9455504	NM_020644	TMEM9B	chr11	8942565	512733
chr11	10390485	10391032	NM_020644	TMEM9B	chr11	8942565	1448194
chr11	10529991	10530343	NM_020644	TMEM9B	chr11	8942565	1587602
chr11	10534627	10535002	NM_020644	TMEM9B	chr11	8942565	1592250
chr11	10584198	10584570	NM_020644	TMEM9B	chr11	8942565	1641819
chr11	10658336	10658996	NM_032867	MICALCL	chr11	12265022	1606356
chr11	11258008	11258480	NM_032867	MICALCL	chr11	12265022	1006778
chr11	11725774	11726180	NM_032867	MICALCL	chr11	12265022	539045
chr11	12044842	12045364	NM_032867	MICALCL	chr11	12265022	219919
chr11	12303968	12304370	NM_032867	MICALCL	chr11	12265022	39147
chr11	12701524	12701932	NM_021961	TEAD1	chr11	12652544	49184
chr11	12820385	12820979	NM_021961	TEAD1	chr11	12652544	168138
chr11	14168472	14168848	NM_021961	TEAD1	chr11	12652544	1516116
chr11	14912937	14913294	NM_021961	TEAD1	chr11	12652544	2260572
chr11	15211666	15212039	NM_021961	TEAD1	chr11	12652544	2559309
chr11	15276829	15277203	NM_021961	TEAD1	chr11	12652544	2624472
chr11	15278442	15278790	NM_021961	TEAD1	chr11	12652544	2626072
chr11	15285622	15286277	NM_021961	TEAD1	chr11	12652544	2633406
chr11	15832486	15832897	NM_138421	SAAL1	chr11	18084214	2251522
chr11	15979695	15980289	NM_138421	SAAL1	chr11	18084214	2104222
chr11	16000308	16000499	NM_138421	SAAL1	chr11	18084214	2083810
chr11	16103790	16104174	NM_138421	SAAL1	chr11	18084214	1980232
chr11	16327782	16328038	NM_138421	SAAL1	chr11	18084214	1756304
chr11	16351921	16352056	NM_138421	SAAL1	chr11	18084214	1732225
chr11	16884250	16884431	NM_138421	SAAL1	chr11	18084214	1199873
chr11	17218916	17219201	NM_138421	SAAL1	chr11	18084214	865155
chr11	17331756	17332146	NM_138421	SAAL1	chr11	18084214	752263
chr11	17537466	17538278	NM_138421	SAAL1	chr11	18084214	546342
chr11	17591317	17591764	NM_138421	SAAL1	chr11	18084214	492673
chr11	18242856	18243677	NM_005566	LDHA	chr11	18372511	129244
chr11	18504749	18505362	NM_005566	LDHA	chr11	18372511	132545
chr11	18756018	18756376	NM_006906	PTPN5	chr11	18769965	13768
chr11	18787325	18787468	NM_006906	PTPN5	chr11	18769965	17432
chr11	21551708	21552129	NM_177553	GAS2	chr11	22646229	1094310
chr11	21886341	21886717	NM_177553	GAS2	chr11	22646229	759700
chr11	21888906	21889633	NM_177553	GAS2	chr11	22646229	756959
chr11	22720353	22720818	NM_177553	GAS2	chr11	22646229	74357
chr11	26438376	26438734	NM_177553	GAS2	chr11	22646229	3792326
chr11	26704122	26704505	NM_001584	MPPED2	chr11	30558616	3854302
chr11	27214057	27214258	NM_001584	MPPED2	chr11	30558616	3344458
chr11	27324483	27324613	NM_001584	MPPED2	chr11	30558616	3234068
chr11	27762018	27762398	NM_001584	MPPED2	chr11	30558616	2796408
chr11	28045467	28045952	NM_001584	MPPED2	chr11	30558616	2512906
chr11	30727356	30727786	NM_001584	MPPED2	chr11	30558616	168955
chr11	30790961	30791134	NM_001584	MPPED2	chr11	30558616	232432
chr11	30792003	30793626	NM_001584	MPPED2	chr11	30558616	234199
chr11	32029276	32029645	NM_001584	MPPED2	chr11	30558616	1470845
chr11	32095795	32096278	NM_001584	MPPED2	chr11	30558616	1537421
chr11	32310539	32310766	NM_203330	CD59	chr11	33714601	1403948
chr11	32348293	32348672	NM_203330	CD59	chr11	33714601	1366118
chr11	32370065	32370599	NM_203330	CD59	chr11	33714601	1344269
chr11	32508124	32508528	NM_203330	CD59	chr11	33714601	1206275
chr11	33178788	33179233	NM_203330	CD59	chr11	33714601	535590
chr11	33815559	33815805	NM_203330	CD59	chr11	33714601	101081
chr11	34024283	34024434	NM_203330	CD59	chr11	33714601	309758
chr11	36143886	36144271	NM_024841	PRR5L	chr11	36354110	210031
chr11	36352049	36352252	NM_024841	PRR5L	chr11	36354110	1959
chr11	36463456	36463835	NM_024841	PRR5L	chr11	36354110	109536
chr11	37254958	37255720	NM_024841	PRR5L	chr11	36354110	901229
chr11	37256177	37256547	NM_024841	PRR5L	chr11	36354110	902252
chr11	37538551	37538952	NM_024841	PRR5L	chr11	36354110	1184642
chr11	37574919	37575248	NM_024841	PRR5L	chr11	36354110	1220974
chr11	37779928	37780313	NM_024841	PRR5L	chr11	36354110	1426011
chr11	38380425	38380808	NM_024841	PRR5L	chr11	36354110	2026507
chr11	38966744	38967707	NM_024841	PRR5L	chr11	36354110	2613116
chr11	39002380	39002719	NM_024841	PRR5L	chr11	36354110	2648440
chr11	39198740	39199028	NM_024841	PRR5L	chr11	36354110	2844774
chr11	39436653	39437024	NM_024841	PRR5L	chr11	36354110	3082729
chr11	40330025	40330470	NM_032592	ACCS	chr11	44044387	3714139
chr11	40524027	40524405	NM_032592	ACCS	chr11	44044387	3520171
chr11	40938103	40938476	NM_032592	ACCS	chr11	44044387	3106097
chr11	41475931	41476532	NM_032592	ACCS	chr11	44044387	2568155
chr11	41830294	41830662	NM_032592	ACCS	chr11	44044387	2213909
chr11	42511194	42511577	NM_032592	ACCS	chr11	44044387	1533001
chr11	42986245	42986662	NM_032592	ACCS	chr11	44044387	1057933
chr11	43031949	43032231	NM_032592	ACCS	chr11	44044387	1012297
chr11	44164935	44165317	NM_032592	ACCS	chr11	44044387	120739
chr11	44169794	44170157	NM_032592	ACCS	chr11	44044387	125589
chr11	44268958	44269350	NM_032592	ACCS	chr11	44044387	224767
chr11	44271155	44271537	NM_032592	ACCS	chr11	44044387	226959
chr11	44292712	44293041	NM_032592	ACCS	chr11	44044387	248490
chr11	44300974	44301441	NM_002231	CD82	chr11	44543716	242508
chr11	44601458	44601822	NM_002231	CD82	chr11	44543716	57924
chr11	44870921	44872035	NM_001076787	TP53I11	chr11	44929184	57706
chr11	45661499	45661675	NM_018389	SLC35C1	chr11	45783216	121629
chr11	45721438	45721833	NM_018389	SLC35C1	chr11	45783216	61580
chr11	46678880	46679028	NM_004308	ARHGAP1	chr11	46678696	258
chr11	47030468	47030854	NM_001003676	C11orf49	chr11	46914826	115835
chr11	47033272	47033697	NM_001003676	C11orf49	chr11	46914826	118659
chr11	49294267	49294645	NM_015231	NUP160	chr11	47826633	1467823
chr11	54834909	54835327	NM_003146	SSRP1	chr11	56859927	2024809
chr11	54946119	54946442	NM_003146	SSRP1	chr11	56859927	1913646
chr11	54957954	54958327	NM_003146	SSRP1	chr11	56859927	1901786
chr11	55959212	55959792	NM_003146	SSRP1	chr11	56859927	900425
chr11	57005463	57005877	NM_003627	SLC43A1	chr11	57039735	34065
chr11	57033543	57033896	NM_003627	SLC43A1	chr11	57039735	6015
chr11	57147195	57147575	NM_000062	SERPING1	chr11	57121602	25783
chr11	57163379	57163829	NM_000062	SERPING1	chr11	57121602	42002
chr11	57558626	57559010	NM_000062	SERPING1	chr11	57121602	437216
chr11	58252765	58253156	NM_004811	LPXN	chr11	58099966	152995
chr11	59081284	59081876	NM_004811	LPXN	chr11	58099966	981614
chr11	59090051	59090373	NM_004811	LPXN	chr11	58099966	990246
chr11	59152391	59152766	NM_004811	LPXN	chr11	58099966	1052613
chr11	59214570	59214894	NM_004811	LPXN	chr11	58099966	1114766
chr11	61029600	61030078	NM_016499	TMEM216	chr11	60916440	113399
chr11	61377140	61377467	NM_004265	FADS2	chr11	61352288	25016
chr11	61446545	61446959	NM_004183	BEST1	chr11	61473931	27179
chr11	61468253	61468416	NM_004183	BEST1	chr11	61473931	5596
chr11	61474284	61474688	NM_004183	BEST1	chr11	61473931	555
chr11	62669258	62669831	NM_001012661	SLC3A2	chr11	62380093	289452
chr11	63731194	63731709	NM_006819	STIP1	chr11	63710162	21290
chr11	63920023	63920497	NM_003377	VEGFB	chr11	63758841	161419
chr11	64753986	64754329	NM_002689	POLA2	chr11	64786007	31849
chr11	65845322	65845686	NM_020404	CD248	chr11	65841091	4413
chr11	65914557	65914655	NM_001532	SLC29A2	chr11	65895867	18739
chr11	66560033	66560490	NM_005133	RCE1	chr11	66367458	192804
chr11	66601095	66601253	NM_005133	RCE1	chr11	66367458	233716
chr11	66812349	66812699	NM_004584	RAD9A	chr11	66915998	103474
chr11	68654768	68655055	NM_015973	GAL	chr11	68208558	446354
chr11	68730448	68730795	NM_015973	GAL	chr11	68208558	522064
chr11	68821069	68821621	NM_015973	GAL	chr11	68208558	612787
chr11	68835891	68836464	NM_015973	GAL	chr11	68208558	627620
chr11	69062540	69062935	NM_003626	PPFIA1	chr11	69794470	731732
chr11	69123338	69123947	NM_003626	PPFIA1	chr11	69794470	670827
chr11	69146109	69146275	NM_003626	PPFIA1	chr11	69794470	648278
chr11	69229509	69230056	NM_003626	PPFIA1	chr11	69794470	564687
chr11	69236088	69236646	NM_003626	PPFIA1	chr11	69794470	558103
chr11	69619133	69620163	NM_003626	PPFIA1	chr11	69794470	174822
chr11	69710073	69710322	NM_003626	PPFIA1	chr11	69794470	84272
chr11	69791211	69791586	NM_003626	PPFIA1	chr11	69794470	3071
chr11	70774938	70775311	NM_001360	DHCR7	chr11	70837125	62000
chr11	70779442	70779842	NM_001360	DHCR7	chr11	70837125	57483
chr11	71596020	71596178	NM_000803	FOLR2	chr11	71605466	9367
chr11	72538566	72538950	NM_014824	FCHSD2	chr11	72530791	7967
chr11	73818122	73818324	NM_005472	KCNE3	chr11	73856248	38025
chr11	73857181	73857549	NM_005472	KCNE3	chr11	73856248	1117
chr11	73859182	73859572	NM_005472	KCNE3	chr11	73856248	3129
chr11	74550218	74550612	NM_006591	POLD3	chr11	73981276	569139
chr11	75797232	75797686	NM_004055	CAPN5	chr11	76455639	658180
chr11	75883257	75883473	NM_004055	CAPN5	chr11	76455639	572274
chr11	77032791	77033216	NM_004055	CAPN5	chr11	76455639	577365
chr11	77211797	77212637	NM_080491	GAB2	chr11	77806516	594299
chr11	79471961	79472162	NM_080491	GAB2	chr11	77806516	1665546
chr11	80411376	80411543	NM_080491	GAB2	chr11	77806516	2604944
chr11	80610873	80611297	NM_080491	GAB2	chr11	77806516	2804569
chr11	80705935	80706291	NM_080491	GAB2	chr11	77806516	2899597
chr11	80876108	80876472	NM_080491	GAB2	chr11	77806516	3069774
chr11	81193400	81194340	NM_080491	GAB2	chr11	77806516	3387354
chr11	81251916	81252299	NM_080491	GAB2	chr11	77806516	3445592
chr11	82139442	82139886	NM_007166	PICALM	chr11	85457756	3318092
chr11	82881865	82882236	NM_007166	PICALM	chr11	85457756	2575705
chr11	83122920	83123274	NM_007166	PICALM	chr11	85457756	2334659
chr11	83135789	83136182	NM_007166	PICALM	chr11	85457756	2321770
chr11	83334520	83334849	NM_007166	PICALM	chr11	85457756	2123071
chr11	83547253	83547391	NM_007166	PICALM	chr11	85457756	1910434
chr11	83606901	83607371	NM_007166	PICALM	chr11	85457756	1850620
chr11	83716892	83717205	NM_007166	PICALM	chr11	85457756	1740707
chr11	85145344	85145801	NM_007166	PICALM	chr11	85457756	312183
chr11	86328111	86328458	NM_007173	PRSS23	chr11	86189138	139147
chr11	86583900	86584063	NM_007173	PRSS23	chr11	86189138	394844
chr11	86585353	86585501	NM_007173	PRSS23	chr11	86189138	396289
chr11	87143716	87144066	NM_022337	RAB38	chr11	87548247	404356
chr11	87289048	87289442	NM_022337	RAB38	chr11	87548247	259002
chr11	88808863	88809251	NM_001814	CTSC	chr11	87710589	1098468
chr11	89643884	89644361	NM_001814	CTSC	chr11	87710589	1933534
chr11	90210322	90210716	NM_001814	CTSC	chr11	87710589	2499930
chr11	90310812	90311221	NM_001814	CTSC	chr11	87710589	2600428
chr11	90874921	90875145	NM_020179	C11orf75	chr11	92916194	2041161
chr11	91665679	91665961	NM_020179	C11orf75	chr11	92916194	1250374
chr11	91808107	91808502	NM_020179	C11orf75	chr11	92916194	1107889
chr11	92138654	92139355	NM_020179	C11orf75	chr11	92916194	777189
chr11	92958515	92958735	NM_020179	C11orf75	chr11	92916194	42431
chr11	92976033	92976305	NM_020179	C11orf75	chr11	92916194	59975
chr11	94105443	94105819	NM_144665	SESN3	chr11	94603894	498263
chr11	94767267	94767830	NM_144665	SESN3	chr11	94603894	163655
chr11	94789786	94790031	NM_144665	SESN3	chr11	94603894	186015
chr11	95107369	95107754	NM_144665	SESN3	chr11	94603894	503668
chr11	95535652	95535961	NM_032427	MAML2	chr11	95715992	180185
chr11	95615920	95616271	NM_032427	MAML2	chr11	95715992	99896
chr11	96358611	96358969	NM_003772	JRKL	chr11	95762805	595985
chr11	96524647	96525047	NM_003772	JRKL	chr11	95762805	762042
chr11	98577292	98577510	NM_032021	TMEM133	chr11	100368020	1790619
chr11	98598147	98598538	NM_032021	TMEM133	chr11	100368020	1769677
chr11	98973915	98974543	NM_032021	TMEM133	chr11	100368020	1393791
chr11	99470546	99470922	NM_032021	TMEM133	chr11	100368020	897286
chr11	99479294	99479668	NM_032021	TMEM133	chr11	100368020	888539
chr11	99835760	99836149	NM_032021	TMEM133	chr11	100368020	532065
chr11	100022178	100022551	NM_032021	TMEM133	chr11	100368020	345655
chr11	100082283	100082995	NM_032021	TMEM133	chr11	100368020	285381
chr11	100325368	100325832	NM_032021	TMEM133	chr11	100368020	42420
chr11	100903082	100903933	NM_004621	TRPC6	chr11	100959869	56361
chr11	100910956	100911342	NM_004621	TRPC6	chr11	100959869	48720
chr11	101166099	101166482	NM_004621	TRPC6	chr11	100959869	206422
chr11	102222658	102222851	NM_002422	MMP3	chr11	102219552	3203
chr11	102297745	102298238	NM_002422	MMP3	chr11	102219552	78440
chr11	102306496	102306892	NM_002422	MMP3	chr11	102219552	87142
chr11	103075490	103075915	NM_025208	PDGFD	chr11	103540237	464534
chr11	103614855	103615231	NM_025208	PDGFD	chr11	103540237	74806
chr11	104486598	104487031	NM_025208	PDGFD	chr11	103540237	946578
chr11	104550308	104550860	NM_025208	PDGFD	chr11	103540237	1010347
chr11	104753866	104754237	NM_025208	PDGFD	chr11	103540237	1213815
chr11	106333038	106333517	NM_003063	SLN	chr11	107087997	754719
chr11	106818239	106819041	NM_003063	SLN	chr11	107087997	269357
chr11	107232588	107233189	NM_017515	SLC35F2	chr11	107235124	2235
chr11	108570301	108570724	NM_017516	RAB39	chr11	107304486	1266027
chr11	108723407	108723815	NM_020809	ARHGAP20	chr11	110088661	1365050
chr11	109221468	109221820	NM_020809	ARHGAP20	chr11	110088661	867017
chr11	109319809	109320228	NM_020809	ARHGAP20	chr11	110088661	768642
chr11	109399814	109400189	NM_020809	ARHGAP20	chr11	110088661	688659
chr11	109730652	109731020	NM_020809	ARHGAP20	chr11	110088661	357825
chr11	110033732	110034112	NM_020809	ARHGAP20	chr11	110088661	54739
chr11	110230377	110230793	NM_020809	ARHGAP20	chr11	110088661	141924
chr11	110351800	110352028	NM_020809	ARHGAP20	chr11	110088661	263253
chr11	110640641	110641048	NM_207429	C11orf92	chr11	110675749	34904
chr11	110728919	110729134	NM_207429	C11orf92	chr11	110675749	53278
chr11	111297407	111298005	NM_138378	FDXACB1	chr11	111255363	42343
chr11	111504631	111505007	NM_031938	BCO2	chr11	111551417	46598
chr11	111597083	111598366	NM_031938	BCO2	chr11	111551417	46308
chr11	111668060	111668442	NM_031938	BCO2	chr11	111551417	116834
chr11	111875547	111875899	NM_031938	BCO2	chr11	111551417	324306
chr11	112224917	112225286	NM_181351	NCAM1	chr11	112337204	112102
chr11	112268476	112268885	NM_181351	NCAM1	chr11	112337204	68523
chr11	112284888	112285250	NM_181351	NCAM1	chr11	112337204	52135
chr11	112387877	112388147	NM_181351	NCAM1	chr11	112337204	50808
chr11	112406425	112406816	NM_181351	NCAM1	chr11	112337204	69417
chr11	112680880	112681541	NM_017868	TTC12	chr11	112690460	9249
chr11	112698041	112698482	NM_017868	TTC12	chr11	112690460	7802
chr11	112757574	112757948	NM_017868	TTC12	chr11	112690460	67301
chr11	113003254	113003716	NM_006028	HTR3B	chr11	113280798	277313
chr11	113515046	113515418	NM_006006	ZBTB16	chr11	113435640	79592
chr11	113517953	113518674	NM_006006	ZBTB16	chr11	113435640	82674
chr11	113524096	113524472	NM_006006	ZBTB16	chr11	113435640	88644
chr11	114115110	114115473	NM_006006	ZBTB16	chr11	113435640	679652
chr11	116392145	116392516	NM_001040455	SIDT2	chr11	116555148	162817
chr11	116394962	116395346	NM_001040455	SIDT2	chr11	116555148	159994
chr11	116555662	116555892	NM_001040455	SIDT2	chr11	116555148	629
chr11	116883036	116884402	NM_012104	BACE1	chr11	116692182	191537
chr11	116953207	116953448	NM_012104	BACE1	chr11	116692182	261146
chr11	117424314	117424645	NM_198275	MPZL3	chr11	117628221	203741
chr11	119553868	119554235	NM_006288	THY1	chr11	118799456	754596
chr11	119649876	119650274	NM_152715	TBCEL	chr11	120400022	749947
chr11	121072549	121072915	NM_152715	TBCEL	chr11	120400022	672710
chr11	121098732	121099210	NM_152715	TBCEL	chr11	120400022	698949
chr11	121156796	121156947	NM_152715	TBCEL	chr11	120400022	756850
chr11	121305508	121305897	NM_152715	TBCEL	chr11	120400022	905681
chr11	121605107	121605614	NM_024769	ASAM	chr11	122571217	965856
chr11	121606442	121606708	NM_024769	ASAM	chr11	122571217	964642
chr11	121629070	121629775	NM_024769	ASAM	chr11	122571217	941794
chr11	121646734	121647651	NM_024769	ASAM	chr11	122571217	924024
chr11	121976780	121977066	NM_024769	ASAM	chr11	122571217	594294
chr11	121991333	121991657	NM_024769	ASAM	chr11	122571217	579722
chr11	122133918	122134733	NM_024769	ASAM	chr11	122571217	436891
chr11	122316557	122316966	NM_024769	ASAM	chr11	122571217	254455
chr11	122513423	122513844	NM_024769	ASAM	chr11	122571217	57583
chr11	122526406	122526751	NM_024769	ASAM	chr11	122571217	44638
chr11	122589156	122589665	NM_024769	ASAM	chr11	122571217	18194
chr11	122592181	122592523	NM_024769	ASAM	chr11	122571217	21135
chr11	122603375	122603762	NM_024769	ASAM	chr11	122571217	32352
chr11	122659913	122660349	NM_024769	ASAM	chr11	122571217	88914
chr11	122736540	122736727	NM_024769	ASAM	chr11	122571217	165417
chr11	122843449	122843913	NM_024769	ASAM	chr11	122571217	272464
chr11	122889359	122889523	NM_024769	ASAM	chr11	122571217	318224
chr11	123468908	123469079	NM_025004	CCDC15	chr11	124329226	860232
chr11	123512462	123512675	NM_025004	CCDC15	chr11	124329226	816657
chr11	124100541	124101069	NM_025004	CCDC15	chr11	124329226	228421
chr11	124550311	124550552	NM_022062	PKNOX2	chr11	124539768	10664
chr11	124551455	124551818	NM_022062	PKNOX2	chr11	124539768	11869
chr11	124552620	124553563	NM_022062	PKNOX2	chr11	124539768	13324
chr11	126004094	126004542	NM_006278	ST3GAL4	chr11	125731305	273013
chr11	126007479	126007883	NM_006278	ST3GAL4	chr11	125731305	276376
chr11	126604359	126604772	NM_006278	ST3GAL4	chr11	125731305	873261
chr11	127308522	127309337	NM_006278	ST3GAL4	chr11	125731305	1577625
chr11	127406032	127406253	NM_006278	ST3GAL4	chr11	125731305	1674838
chr11	127412629	127413009	NM_006278	ST3GAL4	chr11	125731305	1681514
chr11	127427807	127428253	NM_006278	ST3GAL4	chr11	125731305	1696725
chr11	127853208	127853721	NM_006278	ST3GAL4	chr11	125731305	2122160
chr11	128133031	128133591	NM_014758	SNX19	chr11	130291592	2158281
chr11	128143213	128143439	NM_014758	SNX19	chr11	130291592	2148266
chr11	128147712	128148315	NM_014758	SNX19	chr11	130291592	2143578
chr11	128157045	128157143	NM_014758	SNX19	chr11	130291592	2134498
chr11	128180454	128180552	NM_014758	SNX19	chr11	130291592	2111089
chr11	128182263	128182361	NM_014758	SNX19	chr11	130291592	2109280
chr11	128184236	128184334	NM_014758	SNX19	chr11	130291592	2107307
chr11	128185610	128186197	NM_014758	SNX19	chr11	130291592	2105688
chr11	128676400	128676817	NM_014758	SNX19	chr11	130291592	1614983
chr11	128918852	128919118	NM_014758	SNX19	chr11	130291592	1372607
chr11	129436213	129436438	NM_014758	SNX19	chr11	130291592	855266
chr11	129472497	129472861	NM_014758	SNX19	chr11	130291592	818913
chr11	129813447	129813838	NM_014758	SNX19	chr11	130291592	477949
chr11	131108415	131108592	NM_014758	SNX19	chr11	130291592	816912
chr11	131135287	131135972	NM_014758	SNX19	chr11	130291592	844038
chr11	131186386	131186741	NM_014758	SNX19	chr11	130291592	894972
chr11	131190819	131191135	NM_014758	SNX19	chr11	130291592	899385
chr11	131279907	131280149	NM_014758	SNX19	chr11	130291592	988436
chr11	131351085	131351474	NM_014758	SNX19	chr11	130291592	1059688
chr11	131373285	131373715	NM_014758	SNX19	chr11	130291592	1081908
chr11	131827374	131827769	NM_014758	SNX19	chr11	130291592	1535980
chr11	132390320	132390706	NM_015261	NCAPD3	chr11	133599636	1209123
chr11	134362645	134362978	NM_138342	GLB1L2	chr11	133706977	655835
chr11	134391423	134391627	NM_138342	GLB1L2	chr11	133706977	684548
chr11	134392420	134392842	NM_138342	GLB1L2	chr11	133706977	685654
chr12	2263977	2264354	NM_000719	CACNA1C	chr12	2032676	231490
chr12	2314618	2314880	NM_000719	CACNA1C	chr12	2032676	282073
chr12	2358041	2358575	NM_000719	CACNA1C	chr12	2032676	325632
chr12	3029742	3030105	NM_006675	TSPAN9	chr12	3056781	26857
chr12	3228560	3228926	NM_006675	TSPAN9	chr12	3056781	171962
chr12	3325927	3326365	NM_006675	TSPAN9	chr12	3056781	269365
chr12	3928109	3928465	NM_001759	CCND2	chr12	4253162	324875
chr12	4075489	4075710	NM_001759	CCND2	chr12	4253162	177562
chr12	4394656	4395031	NM_001759	CCND2	chr12	4253162	141682
chr12	4463754	4464291	NM_001759	CCND2	chr12	4253162	210861
chr12	6642329	6642963	NM_032489	ACRBP	chr12	6626841	15805
chr12	6668740	6669288	NM_016162	ING4	chr12	6642569	26445
chr12	6923220	6923780	NM_001007026	ATN1	chr12	6903886	19614
chr12	7656263	7656650	NM_014718	CLSTN3	chr12	7174233	482224
chr12	7870574	7870789	NM_014718	CLSTN3	chr12	7174233	696449
chr12	8637071	8637432	NM_020734	RIMKLB	chr12	8741784	104532
chr12	8884668	8885028	NM_020734	RIMKLB	chr12	8741784	143064
chr12	9791107	9791524	NM_018423	STYK1	chr12	10718158	926842
chr12	10283152	10283329	NM_018423	STYK1	chr12	10718158	434917
chr12	10292255	10292637	NM_018423	STYK1	chr12	10718158	425712
chr12	11246361	11246746	NM_176890	TAS2R50	chr12	11030778	215776
chr12	11640007	11640651	NM_001987	ETV6	chr12	11694054	53725
chr12	11644453	11644989	NM_001987	ETV6	chr12	11694054	49333
chr12	11803631	11804081	NM_001987	ETV6	chr12	11694054	109802
chr12	11810012	11810333	NM_001987	ETV6	chr12	11694054	116119
chr12	11899781	11900157	NM_001987	ETV6	chr12	11694054	205915
chr12	12292508	12292858	NM_030640	DUSP16	chr12	12606584	313901
chr12	12293816	12293941	NM_030640	DUSP16	chr12	12606584	312705
chr12	12988844	12989178	NM_018654	GPRC5D	chr12	12994585	5574
chr12	14237787	14238360	NM_024829	PLBD1	chr12	14612058	373984
chr12	14284306	14284673	NM_024829	PLBD1	chr12	14612058	327568
chr12	14479157	14479525	NM_024829	PLBD1	chr12	14612058	132717
chr12	14814673	14815059	NM_175054	HIST4H4	chr12	14815332	466
chr12	15005212	15005585	NM_000900	MGP	chr12	14930095	75304
chr12	15323417	15323946	NM_030667	PTPRO	chr12	15366753	43071
chr12	16156301	16156751	NM_004447	EPS8	chr12	15833777	322749
chr12	16672896	16673270	NM_004447	EPS8	chr12	15833777	839306
chr12	16770403	16770662	NM_004447	EPS8	chr12	15833777	936756
chr12	16822881	16823160	NM_004447	EPS8	chr12	15833777	989244
chr12	16857871	16858125	NM_004447	EPS8	chr12	15833777	1024221
chr12	17107412	17107796	NM_004447	EPS8	chr12	15833777	1273827
chr12	17415830	17416035	NM_004447	EPS8	chr12	15833777	1582156
chr12	18139416	18139796	NM_000921	PDE3A	chr12	20413463	2273857
chr12	19345389	19345840	NM_000921	PDE3A	chr12	20413463	1067848
chr12	19592341	19592836	NM_000921	PDE3A	chr12	20413463	820874
chr12	19674985	19675159	NM_000921	PDE3A	chr12	20413463	738391
chr12	19844284	19844880	NM_000921	PDE3A	chr12	20413463	568881
chr12	21391780	21392135	NM_002907	RECQL	chr12	21545870	153912
chr12	21598307	21598557	NM_002907	RECQL	chr12	21545870	52562
chr12	21761921	21762333	NM_004982	KCNJ8	chr12	21819014	56887
chr12	21972532	21972924	NM_004982	KCNJ8	chr12	21819014	153714
chr12	22076549	22077454	NM_004982	KCNJ8	chr12	21819014	257988
chr12	22219385	22219598	NM_004982	KCNJ8	chr12	21819014	400478
chr12	22248477	22249041	NM_004982	KCNJ8	chr12	21819014	429745
chr12	22895539	22895952	NM_004982	KCNJ8	chr12	21819014	1076732
chr12	22979214	22979668	NM_004982	KCNJ8	chr12	21819014	1160427
chr12	23366462	23366626	NM_152989	SOX5	chr12	24606647	1240103
chr12	23397753	23398322	NM_152989	SOX5	chr12	24606647	1208609
chr12	23608379	23608996	NM_152989	SOX5	chr12	24606647	997959
chr12	24351891	24352109	NM_152989	SOX5	chr12	24606647	254647
chr12	24422561	24423256	NM_152989	SOX5	chr12	24606647	183738
chr12	24810390	24810745	NM_152989	SOX5	chr12	24606647	203921
chr12	24868304	24868481	NM_006152	LRMP	chr12	25096507	228114
chr12	24881147	24881513	NM_006152	LRMP	chr12	25096507	215177
chr12	25969606	25970005	NM_007211	RASSF8	chr12	26003230	33424
chr12	26218539	26218919	NM_007211	RASSF8	chr12	26003230	215499
chr12	26292263	26292683	NM_007211	RASSF8	chr12	26003230	289243
chr12	26564375	26564813	NM_007211	RASSF8	chr12	26003230	561364
chr12	26661784	26662185	NM_007211	RASSF8	chr12	26003230	658755
chr12	26723175	26723566	NM_020183	ARNTL2	chr12	27377254	653883
chr12	27057936	27058324	NM_020183	ARNTL2	chr12	27377254	319124
chr12	28138343	28138515	NM_198965	PTHLH	chr12	28016183	122246
chr12	28395636	28396036	NM_198965	PTHLH	chr12	28016183	379653
chr12	28907602	28907986	NM_198965	PTHLH	chr12	28016183	891611
chr12	30914213	30914724	NM_001002259	CAPRIN2	chr12	30798715	115754
chr12	30946385	30946814	NM_001002259	CAPRIN2	chr12	30798715	147885
chr12	31001787	31002525	NM_001002259	CAPRIN2	chr12	30798715	203441
chr12	31300041	31300421	NM_144973	DENND5B	chr12	31635219	334988
chr12	31790883	31791279	NM_144973	DENND5B	chr12	31635219	155862
chr12	31804952	31805349	NM_144973	DENND5B	chr12	31635219	169932
chr12	31811894	31812242	NM_144973	DENND5B	chr12	31635219	176849
chr12	32631739	32632258	NM_004572	PKP2	chr12	32941047	309048
chr12	32815949	32816546	NM_004572	PKP2	chr12	32941047	124799
chr12	32948222	32948934	NM_004572	PKP2	chr12	32941047	7531
chr12	36735102	36735486	NM_004572	PKP2	chr12	32941047	3794247
chr12	38668573	38668963	NM_153026	PRICKLE1	chr12	41269839	2601071
chr12	38691836	38692221	NM_153026	PRICKLE1	chr12	41269839	2577810
chr12	39128564	39128926	NM_153026	PRICKLE1	chr12	41269839	2141094
chr12	39753424	39754624	NM_153026	PRICKLE1	chr12	41269839	1515815
chr12	39755628	39756010	NM_153026	PRICKLE1	chr12	41269839	1514020
chr12	40202057	40202577	NM_153026	PRICKLE1	chr12	41269839	1067522
chr12	40474454	40474929	NM_153026	PRICKLE1	chr12	41269839	795147
chr12	40481283	40481506	NM_153026	PRICKLE1	chr12	41269839	788444
chr12	40500121	40500321	NM_153026	PRICKLE1	chr12	41269839	769618
chr12	40675312	40675478	NM_153026	PRICKLE1	chr12	41269839	594444
chr12	40957914	40958290	NM_153026	PRICKLE1	chr12	41269839	311737
chr12	40979139	40979532	NM_153026	PRICKLE1	chr12	41269839	290503
chr12	41985275	41985648	NM_153026	PRICKLE1	chr12	41269839	715623
chr12	42648759	42649178	NM_001004329	DBX2	chr12	43731149	1082180
chr12	42737552	42738425	NM_001004329	DBX2	chr12	43731149	993160
chr12	43521992	43522314	NM_001004329	DBX2	chr12	43731149	208996
chr12	43565979	43566355	NM_001004329	DBX2	chr12	43731149	164982
chr12	43652710	43653074	NM_001004329	DBX2	chr12	43731149	78257
chr12	43904783	43905169	NM_001004329	DBX2	chr12	43731149	173827
chr12	44241541	44241684	NM_001004329	DBX2	chr12	43731149	510464
chr12	45131437	45131733	NM_018976	SLC38A2	chr12	45052912	78673
chr12	45292392	45292762	NM_018976	SLC38A2	chr12	45052912	239665
chr12	45431227	45431474	NM_018976	SLC38A2	chr12	45052912	378439
chr12	45553745	45554115	NM_018976	SLC38A2	chr12	45052912	501018
chr12	46032380	46032773	NM_015401	HDAC7	chr12	46500030	467453
chr12	46268378	46268645	NM_015401	HDAC7	chr12	46500030	231518
chr12	46271034	46271389	NM_015401	HDAC7	chr12	46500030	228818
chr12	46271829	46272427	NM_015401	HDAC7	chr12	46500030	227902
chr12	46503491	46503888	NM_015401	HDAC7	chr12	46500030	3660
chr12	46539815	46539946	NM_015401	HDAC7	chr12	46500030	39851
chr12	46588887	46589186	NM_001017535	VDR	chr12	46585081	3956
chr12	46947281	46947651	NM_012404	ANP32D	chr12	47152714	205248
chr12	48343011	48343387	NM_012272	PRPF40B	chr12	48303669	39530
chr12	48460981	48461361	NM_012272	PRPF40B	chr12	48303669	157502
chr12	48976666	48977053	NM_001113546	LIMA1	chr12	48963620	13240
chr12	49305073	49305676	NM_173602	DIP2B	chr12	49185034	120341
chr12	49927512	49927896	NM_001033873	SMAGP	chr12	49950261	22557
chr12	49948405	49948801	NM_001033873	SMAGP	chr12	49950261	1658
chr12	49950414	49950721	NM_001033873	SMAGP	chr12	49950261	307
chr12	49993069	49993438	NM_001033873	SMAGP	chr12	49950261	42993
chr12	51434402	51434569	NM_005554	KRT6A	chr12	51173448	261038
chr12	51653750	51654133	NM_170754	TENC1	chr12	51730101	76159
chr12	52025829	52026200	NM_015665	AAAS	chr12	52001679	24336
chr12	52312239	52312624	NM_006856	ATF7	chr12	52306466	5966
chr12	52369749	52369911	NM_020898	CALCOCO1	chr12	52407574	37744
chr12	52435970	52436425	NM_020898	CALCOCO1	chr12	52407574	28624
chr12	52732143	52732631	NM_004503	HOXC6	chr12	52708460	23927
chr12	52939488	52939897	NM_031157	HNRNPA1	chr12	52960754	21061
chr12	53093409	53093810	NM_005337	NCKAP1L	chr12	53177761	84151
chr12	53182546	53182938	NM_005337	NCKAP1L	chr12	53177761	4981
chr12	53302075	53303047	NM_006741	PPP1R1A	chr12	53268710	33851
chr12	53304807	53305210	NM_006741	PPP1R1A	chr12	53268710	36299
chr12	54521483	54521607	NM_002429	MMP19	chr12	54523002	1457
chr12	55348751	55349370	NM_000946	PRIM1	chr12	55432413	83352
chr12	56425099	56425522	NM_006812	OS9	chr12	56374004	51307
chr12	56516957	56517322	NM_005730	CTDSP2	chr12	56527014	9874
chr12	56932433	56932786	NM_005730	CTDSP2	chr12	56527014	405596
chr12	57288404	57288760	NM_153377	LRIG3	chr12	57600529	311947
chr12	57641853	57642288	NM_153377	LRIG3	chr12	57600529	41542
chr12	57829911	57830282	NM_153377	LRIG3	chr12	57600529	229568
chr12	58117022	58117410	NM_153377	LRIG3	chr12	57600529	516687
chr12	58512026	58512261	NM_153377	LRIG3	chr12	57600529	911615
chr12	59102004	59102405	NM_153377	LRIG3	chr12	57600529	1501676
chr12	59549629	59549801	NM_153377	LRIG3	chr12	57600529	1949186
chr12	59851316	59851678	NM_000706	AVPR1A	chr12	61832857	1981360
chr12	60386727	60387062	NM_000706	AVPR1A	chr12	61832857	1445962
chr12	60808630	60809110	NM_000706	AVPR1A	chr12	61832857	1023987
chr12	60901098	60901467	NM_000706	AVPR1A	chr12	61832857	931574
chr12	61817913	61818290	NM_000706	AVPR1A	chr12	61832857	14755
chr12	62445043	62445327	NM_020762	SRGAP1	chr12	62524807	79622
chr12	62453164	62453543	NM_020762	SRGAP1	chr12	62524807	71453
chr12	62595219	62595595	NM_020762	SRGAP1	chr12	62524807	70600
chr12	62624869	62625262	NM_020762	SRGAP1	chr12	62524807	100259
chr12	62885542	62885967	NM_020762	SRGAP1	chr12	62524807	360948
chr12	63352883	63353094	NM_178169	RASSF3	chr12	63290559	62430
chr12	63814123	63814576	NM_001031679	MSRB3	chr12	63958754	144404
chr12	63819397	63819863	NM_001031679	MSRB3	chr12	63958754	139124
chr12	64610102	64611090	NM_001031679	MSRB3	chr12	63958754	651842
chr12	64636329	64636940	NM_001031679	MSRB3	chr12	63958754	677881
chr12	64746956	64747329	NM_001031679	MSRB3	chr12	63958754	788389
chr12	64795041	64795504	NM_001031679	MSRB3	chr12	63958754	836519
chr12	65278012	65278480	NM_001031679	MSRB3	chr12	63958754	1319492
chr12	66215051	66216016	NM_006654	FRS2	chr12	68150395	1934861
chr12	66272446	66272599	NM_006654	FRS2	chr12	68150395	1877872
chr12	66310785	66311176	NM_006654	FRS2	chr12	68150395	1839414
chr12	67136063	67136419	NM_006654	FRS2	chr12	68150395	1014154
chr12	67356582	67356964	NM_006654	FRS2	chr12	68150395	793622
chr12	67515501	67515881	NM_006654	FRS2	chr12	68150395	634704
chr12	67546948	67547409	NM_006654	FRS2	chr12	68150395	603216
chr12	68311931	68312280	NM_006654	FRS2	chr12	68150395	161711
chr12	68380863	68380978	NM_006654	FRS2	chr12	68150395	230526
chr12	68627996	68628358	NM_014505	KCNMB4	chr12	69046328	418151
chr12	69411020	69411342	NM_014505	KCNMB4	chr12	69046328	364853
chr12	69870781	69871290	NM_014505	KCNMB4	chr12	69046328	824708
chr12	69872995	69873247	NM_014505	KCNMB4	chr12	69046328	826793
chr12	70173362	70174017	NM_014505	KCNMB4	chr12	69046328	1127362
chr12	70177324	70177629	NM_014505	KCNMB4	chr12	69046328	1131149
chr12	70262850	70263259	NM_014505	KCNMB4	chr12	69046328	1216727
chr12	70479244	70479682	NM_014505	KCNMB4	chr12	69046328	1433135
chr12	70557388	70557771	NM_014505	KCNMB4	chr12	69046328	1511252
chr12	70696650	70696992	NM_014505	KCNMB4	chr12	69046328	1650493
chr12	70759217	70759590	NM_014505	KCNMB4	chr12	69046328	1713076
chr12	70764732	70765108	NM_014505	KCNMB4	chr12	69046328	1718592
chr12	71060579	71060867	NM_014505	KCNMB4	chr12	69046328	2014395
chr12	71675550	71675852	NM_006851	GLIPR1	chr12	74160779	2485078
chr12	71779886	71780265	NM_006851	GLIPR1	chr12	74160779	2380703
chr12	72097482	72097744	NM_006851	GLIPR1	chr12	74160779	2063166
chr12	72997629	72997900	NM_006851	GLIPR1	chr12	74160779	1163014
chr12	73049573	73050401	NM_006851	GLIPR1	chr12	74160779	1110792
chr12	73189935	73190354	NM_006851	GLIPR1	chr12	74160779	970634
chr12	73316727	73317104	NM_006851	GLIPR1	chr12	74160779	843863
chr12	73343326	73343516	NM_006851	GLIPR1	chr12	74160779	817358
chr12	73502398	73502762	NM_006851	GLIPR1	chr12	74160779	658199
chr12	73614438	73614813	NM_006851	GLIPR1	chr12	74160779	546153
chr12	73656215	73656342	NM_006851	GLIPR1	chr12	74160779	504500
chr12	73658213	73658613	NM_006851	GLIPR1	chr12	74160779	502366
chr12	73660560	73661057	NM_006851	GLIPR1	chr12	74160779	499970
chr12	75562033	75562574	NM_203394	E2F7	chr12	75983491	421187
chr12	76007984	76008161	NM_203394	E2F7	chr12	75983491	24582
chr12	76131159	76131645	NM_203394	E2F7	chr12	75983491	147911
chr12	76150662	76151009	NM_203394	E2F7	chr12	75983491	167345
chr12	77657514	77657922	NM_014903	NAV3	chr12	76749199	908519
chr12	77803061	77803327	NM_014903	NAV3	chr12	76749199	1053995
chr12	77849278	77849524	NM_014903	NAV3	chr12	76749199	1100202
chr12	77856511	77857133	NM_014903	NAV3	chr12	76749199	1107623
chr12	78161662	78162025	NM_014903	NAV3	chr12	76749199	1412645
chr12	78896698	78897067	NM_024560	ACSS3	chr12	79995939	1099056
chr12	79516974	79517364	NM_024560	ACSS3	chr12	79995939	478770
chr12	79523837	79524121	NM_024560	ACSS3	chr12	79995939	471960
chr12	79525194	79525566	NM_024560	ACSS3	chr12	79995939	470559
chr12	79758968	79759537	NM_024560	ACSS3	chr12	79995939	236686
chr12	80122015	80122275	NM_024560	ACSS3	chr12	79995939	126206
chr12	80212179	80212563	NM_024560	ACSS3	chr12	79995939	216432
chr12	80283736	80284136	NM_024560	ACSS3	chr12	79995939	287997
chr12	80777312	80777970	NM_024560	ACSS3	chr12	79995939	781702
chr12	81462275	81462652	NM_152588	TMTC2	chr12	81605064	142600
chr12	81700922	81701345	NM_152588	TMTC2	chr12	81605064	96070
chr12	82543156	82543559	NM_152588	TMTC2	chr12	81605064	938294
chr12	83228998	83229382	NM_005447	RASSF9	chr12	84754449	1525259
chr12	83859338	83859669	NM_005447	RASSF9	chr12	84754449	894945
chr12	83912931	83913338	NM_005447	RASSF9	chr12	84754449	841314
chr12	84268200	84268701	NM_005447	RASSF9	chr12	84754449	485998
chr12	84274510	84274953	NM_005447	RASSF9	chr12	84754449	479717
chr12	84276806	84277195	NM_005447	RASSF9	chr12	84754449	477448
chr12	84587284	84587662	NM_005447	RASSF9	chr12	84754449	166976
chr12	85165958	85166143	NM_006183	NTS	chr12	84792205	373846
chr12	85632543	85632943	NM_013244	MGAT4C	chr12	85756812	124069
chr12	86301017	86301551	NM_013244	MGAT4C	chr12	85756812	544472
chr12	86467255	86467484	NM_013244	MGAT4C	chr12	85756812	710558
chr12	87132508	87132879	NM_013244	MGAT4C	chr12	85756812	1375882
chr12	87958070	87958471	NM_001001323	ATP2B1	chr12	88573975	615704
chr12	87986543	87986917	NM_001001323	ATP2B1	chr12	88573975	587245
chr12	88016431	88017091	NM_001001323	ATP2B1	chr12	88573975	557214
chr12	88063172	88063544	NM_001001323	ATP2B1	chr12	88573975	510617
chr12	88196723	88197163	NM_001001323	ATP2B1	chr12	88573975	377032
chr12	88226785	88226988	NM_001001323	ATP2B1	chr12	88573975	347088
chr12	88251409	88251792	NM_001001323	ATP2B1	chr12	88573975	322374
chr12	88264466	88264876	NM_001001323	ATP2B1	chr12	88573975	309304
chr12	88265456	88265986	NM_001001323	ATP2B1	chr12	88573975	308254
chr12	88270412	88270815	NM_001001323	ATP2B1	chr12	88573975	303361
chr12	88308101	88308931	NM_001001323	ATP2B1	chr12	88573975	265459
chr12	88330560	88330931	NM_001001323	ATP2B1	chr12	88573975	243229
chr12	88369908	88370173	NM_001001323	ATP2B1	chr12	88573975	203934
chr12	88895388	88895743	NM_001001323	ATP2B1	chr12	88573975	321591
chr12	88983231	88983676	NM_001001323	ATP2B1	chr12	88573975	409479
chr12	89007909	89008463	NM_001001323	ATP2B1	chr12	88573975	434211
chr12	89152078	89152461	NM_001001323	ATP2B1	chr12	88573975	578295
chr12	89559219	89559666	NM_001920	DCN	chr12	90100937	541494
chr12	89773492	89773726	NM_001920	DCN	chr12	90100937	327328
chr12	90047937	90048307	NM_001920	DCN	chr12	90100937	52815
chr12	90057124	90057728	NM_001920	DCN	chr12	90100937	43511
chr12	90496944	90497244	NM_001920	DCN	chr12	90100937	396157
chr12	90538328	90538659	NM_001920	DCN	chr12	90100937	437557
chr12	90637650	90637984	NM_001731	BTG1	chr12	91063804	425987
chr12	91245718	91246114	NM_001731	BTG1	chr12	91063804	182112
chr12	91299722	91300101	NM_001731	BTG1	chr12	91063804	236108
chr12	91583720	91584099	NM_001731	BTG1	chr12	91063804	520106
chr12	91585156	91585498	NM_001731	BTG1	chr12	91063804	521523
chr12	91655495	91655868	NM_001731	BTG1	chr12	91063804	591878
chr12	91886339	91886742	NM_001731	BTG1	chr12	91063804	822737
chr12	92087401	92087553	NM_005761	PLXNC1	chr12	93066629	979152
chr12	92120563	92120957	NM_005761	PLXNC1	chr12	93066629	945869
chr12	92377363	92377815	NM_005761	PLXNC1	chr12	93066629	689040
chr12	92465766	92466148	NM_005761	PLXNC1	chr12	93066629	600672
chr12	92532130	92532512	NM_005761	PLXNC1	chr12	93066629	534308
chr12	94157755	94158122	NM_018351	FGD6	chr12	94135371	22568
chr12	94240868	94241221	NM_018351	FGD6	chr12	94135371	105674
chr12	94745828	94746202	NM_021229	NTN4	chr12	94708667	37348
chr12	94834104	94834482	NM_021229	NTN4	chr12	94708667	125626
chr12	95029674	95029978	NM_005230	ELK3	chr12	95112337	82511
chr12	95112214	95112594	NM_002595	CDK17	chr12	95318436	206032
chr12	95113775	95114244	NM_005230	ELK3	chr12	95112337	1673
chr12	95129468	95130321	NM_005230	ELK3	chr12	95112337	17558
chr12	95157215	95157728	NM_005230	ELK3	chr12	95112337	45135
chr12	95327460	95328257	NM_002595	CDK17	chr12	95318436	9423
chr12	95413030	95413410	NM_002595	CDK17	chr12	95318436	94784
chr12	96955468	96955845	NM_002595	CDK17	chr12	95318436	1637221
chr12	97126900	97127242	NM_002595	CDK17	chr12	95318436	1808635
chr12	97421584	97422290	NM_152317	DEPDC4	chr12	99184988	1763051
chr12	97438138	97438289	NM_152317	DEPDC4	chr12	99184988	1746774
chr12	98298505	98298888	NM_152317	DEPDC4	chr12	99184988	886291
chr12	99046150	99046323	NM_152317	DEPDC4	chr12	99184988	138751
chr12	99358436	99358853	NM_152317	DEPDC4	chr12	99184988	173657
chr12	99431732	99431912	NM_152317	DEPDC4	chr12	99184988	246834
chr12	99888436	99888805	NM_152317	DEPDC4	chr12	99184988	703633
chr12	99899257	99899610	NM_152317	DEPDC4	chr12	99184988	714446
chr12	100567473	100567764	NM_020244	CHPT1	chr12	100615547	47928
chr12	100807290	100807651	NM_020244	CHPT1	chr12	100615547	191924
chr12	100809277	100810053	NM_020244	CHPT1	chr12	100615547	194118
chr12	101093275	101094206	NM_020244	CHPT1	chr12	100615547	478194
chr12	101333314	101333517	NM_020244	CHPT1	chr12	100615547	717869
chr12	101622085	101622396	NM_020244	CHPT1	chr12	100615547	1006694
chr12	103399513	103399900	NM_031302	GLT8D2	chr12	102968045	431662
chr12	103473331	103474030	NM_031302	GLT8D2	chr12	102968045	505636
chr12	104304253	104304693	NM_018171	APPL2	chr12	104154138	150335
chr12	105191794	105192215	NM_152772	TCP11L2	chr12	105220710	28705
chr12	107680017	107680402	NM_018984	SSH1	chr12	107775488	95278
chr12	107776997	107777350	NM_018984	SSH1	chr12	107775488	1686
chr12	107821032	107821430	NM_018984	SSH1	chr12	107775488	45743
chr12	107991357	107991727	NM_032663	USP30	chr12	107974762	16780
chr12	108062324	108062534	NM_003362	UNG	chr12	108020389	42040
chr12	108109058	108109552	NM_003362	UNG	chr12	108020389	88916
chr12	108110143	108110542	NM_003362	UNG	chr12	108020389	89954
chr12	109091170	109091385	NM_033121	ANKRD13A	chr12	108921617	169661
chr12	109372346	109372762	NM_016301	GPN3	chr12	109390472	17918
chr12	109436212	109436353	NM_013300	C12orf24	chr12	109390614	45669
chr12	109437024	109437377	NM_013300	C12orf24	chr12	109390614	46587
chr12	109746733	109747207	NM_001082538	TCTN1	chr12	109536262	210708
chr12	109782975	109783443	NM_001082538	TCTN1	chr12	109536262	246947
chr12	109793450	109793845	NM_001082538	TCTN1	chr12	109536262	257386
chr12	109810780	109811077	NM_001082538	TCTN1	chr12	109536262	274667
chr12	109940378	109940621	NM_005475	SH2B3	chr12	110328134	387634
chr12	109979421	109979788	NM_005475	SH2B3	chr12	110328134	348529
chr12	109992212	109992660	NM_005475	SH2B3	chr12	110328134	335698
chr12	110044688	110045435	NM_005475	SH2B3	chr12	110328134	283072
chr12	110103063	110103670	NM_005475	SH2B3	chr12	110328134	224767
chr12	110322091	110322314	NM_005475	SH2B3	chr12	110328134	5931
chr12	111245995	111246284	NM_006700	TRAFD1	chr12	111047731	198409
chr12	111459889	111460102	NM_014954	RPH3A	chr12	111713931	253935
chr12	111599363	111599773	NM_014954	RPH3A	chr12	111713931	114363
chr12	111720079	111720618	NM_014954	RPH3A	chr12	111713931	6418
chr12	111969509	111969971	NM_001111322	DDX54	chr12	112107667	137927
chr12	112167860	112168333	NM_017901	TPCN1	chr12	112143642	24455
chr12	112274660	112275063	NM_017901	TPCN1	chr12	112143642	131220
chr12	112278444	112278839	NM_017901	TPCN1	chr12	112143642	135000
chr12	112318725	112318878	NM_017901	TPCN1	chr12	112143642	175160
chr12	112399286	112399672	NM_017901	TPCN1	chr12	112143642	255837
chr12	112564532	112565014	NM_017901	TPCN1	chr12	112143642	421131
chr12	112571506	112572098	NM_017901	TPCN1	chr12	112143642	428160
chr12	112596234	112596420	NM_017901	TPCN1	chr12	112143642	452685
chr12	112605605	112605994	NM_017901	TPCN1	chr12	112143642	462158
chr12	112623942	112624331	NM_017901	TPCN1	chr12	112143642	480495
chr12	112646906	112647425	NM_017901	TPCN1	chr12	112143642	503524
chr12	113312635	113312792	NM_017901	TPCN1	chr12	112143642	1169072
chr12	113373820	113374451	NM_017901	TPCN1	chr12	112143642	1230494
chr12	113397183	113397415	NM_017901	TPCN1	chr12	112143642	1253657
chr12	113559829	113560205	NM_017901	TPCN1	chr12	112143642	1416375
chr12	113736084	113736394	NM_015335	MED13L	chr12	115199374	1463135
chr12	113800220	113800874	NM_015335	MED13L	chr12	115199374	1398827
chr12	113808599	113808962	NM_015335	MED13L	chr12	115199374	1390593
chr12	113924532	113925114	NM_015335	MED13L	chr12	115199374	1274551
chr12	113983028	113983499	NM_015335	MED13L	chr12	115199374	1216110
chr12	114268595	114268951	NM_015335	MED13L	chr12	115199374	930601
chr12	115402214	115402581	NM_015335	MED13L	chr12	115199374	203024
chr12	115659788	115660159	NM_015335	MED13L	chr12	115199374	460600
chr12	116264848	116265255	NM_007370	RFC5	chr12	116938890	673838
chr12	118035659	118036298	NM_007174	CIT	chr12	118799475	763496
chr12	118044297	118044557	NM_007174	CIT	chr12	118799475	755048
chr12	118518109	118518498	NM_007174	CIT	chr12	118799475	281171
chr12	118806153	118806336	NM_007174	CIT	chr12	118799475	6770
chr12	119189992	119190363	NM_001080855	PXN	chr12	119187946	2232
chr12	119190890	119191271	NM_001080855	PXN	chr12	119187946	3135
chr12	119196559	119196974	NM_001080855	PXN	chr12	119187946	8821
chr12	119204937	119205313	NM_001080855	PXN	chr12	119187946	17179
chr12	119311546	119311940	NM_001080855	PXN	chr12	119187946	123797
chr12	119345250	119345483	NM_001080855	PXN	chr12	119187946	157421
chr12	119958418	119958955	NM_006549	CAMKK2	chr12	120220494	261807
chr12	120017554	120018173	NM_006549	CAMKK2	chr12	120220494	202630
chr12	120043268	120043595	NM_006549	CAMKK2	chr12	120220494	177062
chr12	120846810	120847665	NM_144668	WDR66	chr12	120840862	6376
chr12	121463441	121464134	NM_003677	DENR	chr12	121803323	339535
chr12	121713553	121713840	NM_003677	DENR	chr12	121803323	89626
chr12	121722876	121723937	NM_003677	DENR	chr12	121803323	79916
chr12	121728720	121729064	NM_003677	DENR	chr12	121803323	74431
chr12	121802244	121802744	NM_003677	DENR	chr12	121803323	829
chr12	122068226	122068675	NM_003959	HIP1R	chr12	121885991	182460
chr12	122157529	122157915	NM_003959	HIP1R	chr12	121885991	271731
chr12	123513962	123514253	NM_006312	NCOR2	chr12	123586102	71994
chr12	123516751	123517105	NM_006312	NCOR2	chr12	123586102	69174
chr12	123771159	123771671	NM_005505	SCARB1	chr12	123914472	143057
chr12	123933336	123934298	NM_005505	SCARB1	chr12	123914472	19345
chr12	123990161	123990922	NM_080626	BRI3BP	chr12	124044146	53604
chr12	125022430	125022798	NM_080626	BRI3BP	chr12	124044146	978468
chr12	125151235	125151636	NM_080626	BRI3BP	chr12	124044146	1107290
chr12	125388838	125389236	NM_080626	BRI3BP	chr12	124044146	1344891
chr12	125505139	125505706	NM_080626	BRI3BP	chr12	124044146	1461277
chr12	125532993	125533284	NM_080626	BRI3BP	chr12	124044146	1488993
chr12	126017399	126017766	NM_145648	SLC15A4	chr12	127874494	1856911
chr12	126129331	126130037	NM_145648	SLC15A4	chr12	127874494	1744810
chr12	126334170	126334487	NM_145648	SLC15A4	chr12	127874494	1540165
chr12	126336906	126337745	NM_145648	SLC15A4	chr12	127874494	1537168
chr12	126556038	126556552	NM_145648	SLC15A4	chr12	127874494	1318199
chr12	126797785	126798253	NM_145648	SLC15A4	chr12	127874494	1076475
chr12	127125465	127125846	NM_145648	SLC15A4	chr12	127874494	748838
chr12	127647795	127648184	NM_145648	SLC15A4	chr12	127874494	226504
chr12	127656624	127656969	NM_145648	SLC15A4	chr12	127874494	217697
chr12	129804689	129805248	NM_024078	NOC4L	chr12	131194945	1389976
chr12	131505392	131505849	NM_006231	POLE	chr12	131774018	268397
chr12	131593322	131593718	NM_006231	POLE	chr12	131774018	180498
chr12	131820891	131821263	NM_006231	POLE	chr12	131774018	47059
chr13	18450483	18451099	NM_017520	MPHOSPH8	chr13	19105787	654996
chr13	18452687	18453279	NM_017520	MPHOSPH8	chr13	19105787	652804
chr13	18662037	18662368	NM_017520	MPHOSPH8	chr13	19105787	443584
chr13	18736769	18737121	NM_017520	MPHOSPH8	chr13	19105787	368842
chr13	18739067	18739506	NM_017520	MPHOSPH8	chr13	19105787	366500
chr13	19059027	19059414	NM_017520	MPHOSPH8	chr13	19105787	46566
chr13	20170290	20170717	NM_021954	GJA3	chr13	19633183	537321
chr13	20268885	20269274	NM_021954	GJA3	chr13	19633183	635897
chr13	20670088	20670383	NM_021954	GJA3	chr13	19633183	1037053
chr13	21353916	21354067	NM_021954	GJA3	chr13	19633183	1720809
chr13	23750854	23751108	NM_153023	SPATA13	chr13	23632860	118121
chr13	24646911	24647178	NM_152704	FAM123A	chr13	24643857	3188
chr13	24658822	24659192	NM_152704	FAM123A	chr13	24643857	15150
chr13	24996832	24997165	NM_152704	FAM123A	chr13	24643857	353142
chr13	25487299	25487725	NM_001007538	SHISA2	chr13	25523198	35686
chr13	26514999	26515911	NM_002097	GTF3A	chr13	26896680	381225
chr13	26931473	26932003	NM_002097	GTF3A	chr13	26896680	35058
chr13	27483597	27483981	NM_002097	GTF3A	chr13	26896680	587109
chr13	27509709	27510091	NM_002097	GTF3A	chr13	26896680	613220
chr13	28131069	28131496	NM_181785	SLC46A3	chr13	28191150	59867
chr13	29510955	29511486	NM_007106	UBL3	chr13	29322820	188401
chr13	29636269	29636658	NM_007106	UBL3	chr13	29322820	313644
chr13	29688274	29688631	NM_007106	UBL3	chr13	29322820	365633
chr13	29837066	29837437	NM_007106	UBL3	chr13	29322820	514432
chr13	29882761	29882955	NM_007106	UBL3	chr13	29322820	560038
chr13	30246465	30246926	NM_007106	UBL3	chr13	29322820	923876
chr13	30272398	30272569	NM_007106	UBL3	chr13	29322820	949664
chr13	30488918	30489323	NM_007106	UBL3	chr13	29322820	1166301
chr13	30494634	30495049	NM_007106	UBL3	chr13	29322820	1172022
chr13	30550335	30550738	NM_007106	UBL3	chr13	29322820	1227717
chr13	32042591	32042756	NM_000059	BRCA2	chr13	31787616	255058
chr13	32505143	32506073	NM_000059	BRCA2	chr13	31787616	717992
chr13	32649972	32650308	NM_002915	RFC3	chr13	33290205	640065
chr13	32906858	32907108	NM_002915	RFC3	chr13	33290205	383222
chr13	33001024	33001613	NM_002915	RFC3	chr13	33290205	288886
chr13	34559364	34560222	NM_004734	DCLK1	chr13	35603464	1043671
chr13	35024521	35025458	NM_004734	DCLK1	chr13	35603464	578474
chr13	35436374	35436828	NM_004734	DCLK1	chr13	35603464	166863
chr13	35629531	35629979	NM_004734	DCLK1	chr13	35603464	26291
chr13	35953014	35953408	NM_203451	C13orf36	chr13	36146048	192837
chr13	36312107	36312498	NM_005905	SMAD9	chr13	36392409	80106
chr13	36439146	36439834	NM_005905	SMAD9	chr13	36392409	47081
chr13	36483896	36484539	NM_005905	SMAD9	chr13	36392409	91809
chr13	36673159	36673562	NM_005905	SMAD9	chr13	36392409	280952
chr13	37414325	37414717	NM_016179	TRPC4	chr13	37341939	72582
chr13	37439316	37439767	NM_016179	TRPC4	chr13	37341939	97603
chr13	37457305	37457510	NM_016179	TRPC4	chr13	37341939	115469
chr13	37507122	37507926	NM_016179	TRPC4	chr13	37341939	165585
chr13	38008108	38008432	NM_207361	FREM2	chr13	38159172	150902
chr13	38632853	38633253	NM_207361	FREM2	chr13	38159172	473881
chr13	38841549	38841923	NM_207361	FREM2	chr13	38159172	682564
chr13	38979830	38980226	NM_207361	FREM2	chr13	38159172	820856
chr13	39105747	39106132	NM_207361	FREM2	chr13	38159172	946768
chr13	39424322	39424940	NM_002015	FOXO1	chr13	40138734	714103
chr13	39549205	39549572	NM_002015	FOXO1	chr13	40138734	589345
chr13	39865934	39866232	NM_002015	FOXO1	chr13	40138734	272651
chr13	41826419	41827051	NM_013238	DNAJC15	chr13	42495361	668626
chr13	42350589	42350994	NM_013238	DNAJC15	chr13	42495361	144569
chr13	43589402	43590120	NM_017993	ENOX1	chr13	43259106	330655
chr13	43830296	43830509	NM_183422	TSC22D1	chr13	44048701	218298
chr13	44640683	44640953	NM_183422	TSC22D1	chr13	44048701	592117
chr13	44791990	44792355	NM_183422	TSC22D1	chr13	44048701	743472
chr13	44801753	44802157	NM_183422	TSC22D1	chr13	44048701	753254
chr13	44912218	44912608	NM_183422	TSC22D1	chr13	44048701	863712
chr13	45150677	45151041	NM_025113	C13orf18	chr13	45859636	708777
chr13	45224573	45224996	NM_025113	C13orf18	chr13	45859636	634851
chr13	45254350	45254739	NM_025113	C13orf18	chr13	45859636	605091
chr13	45309415	45309926	NM_025113	C13orf18	chr13	45859636	549965
chr13	45367863	45368244	NM_025113	C13orf18	chr13	45859636	491582
chr13	45369237	45369429	NM_025113	C13orf18	chr13	45859636	490303
chr13	45371443	45372031	NM_025113	C13orf18	chr13	45859636	487899
chr13	45448058	45448499	NM_025113	C13orf18	chr13	45859636	411357
chr13	45588990	45589163	NM_025113	C13orf18	chr13	45859636	270559
chr13	45597665	45598252	NM_025113	C13orf18	chr13	45859636	261677
chr13	45860338	45860898	NM_025113	C13orf18	chr13	45859636	982
chr13	45862025	45862581	NM_025113	C13orf18	chr13	45859636	2667
chr13	45876755	45877092	NM_025113	C13orf18	chr13	45859636	17288
chr13	46138833	46139211	NM_025113	C13orf18	chr13	45859636	279386
chr13	47964614	47964976	NM_001268	RCBTB2	chr13	48005317	40522
chr13	48663080	48663633	NM_001268	RCBTB2	chr13	48005317	658040
chr13	49860487	49861092	NM_213590	TRIM13	chr13	49469143	391647
chr13	50620407	50620867	NM_199289	NEK5	chr13	51601215	980578
chr13	50973799	50974016	NM_199289	NEK5	chr13	51601215	627307
chr13	52240077	52240698	NM_018676	THSD1	chr13	51878630	361758
chr13	52241130	52241515	NM_018676	THSD1	chr13	51878630	362693
chr13	52271092	52271481	NM_018676	THSD1	chr13	51878630	392657
chr13	52630922	52631100	NM_018676	THSD1	chr13	51878630	752381
chr13	53489781	53490204	NM_018676	THSD1	chr13	51878630	1611363
chr13	54280199	54281115	NM_018676	THSD1	chr13	51878630	2402027
chr13	54588363	54588992	NM_001040429	PCDH17	chr13	57103789	2515111
chr13	54603557	54603961	NM_001040429	PCDH17	chr13	57103789	2500030
chr13	54916050	54916418	NM_001040429	PCDH17	chr13	57103789	2187555
chr13	54981392	54981615	NM_001040429	PCDH17	chr13	57103789	2122285
chr13	55236160	55236545	NM_001040429	PCDH17	chr13	57103789	1867436
chr13	55535263	55535633	NM_001040429	PCDH17	chr13	57103789	1568341
chr13	55749676	55750043	NM_001040429	PCDH17	chr13	57103789	1353929
chr13	56174095	56174394	NM_001040429	PCDH17	chr13	57103789	929544
chr13	56586712	56586883	NM_001040429	PCDH17	chr13	57103789	516991
chr13	57505176	57505687	NM_001040429	PCDH17	chr13	57103789	401643
chr13	57907899	57908281	NM_001040429	PCDH17	chr13	57103789	804301
chr13	57933798	57933999	NM_001040429	PCDH17	chr13	57103789	830110
chr13	58054548	58054779	NM_001040429	PCDH17	chr13	57103789	950875
chr13	58134840	58135244	NM_001040429	PCDH17	chr13	57103789	1031253
chr13	58692030	58692430	NM_001040429	PCDH17	chr13	57103789	1588441
chr13	59014366	59014777	NM_022843	PCDH20	chr13	60887656	1873084
chr13	59015788	59015907	NM_022843	PCDH20	chr13	60887656	1871808
chr13	59155539	59155932	NM_022843	PCDH20	chr13	60887656	1731920
chr13	59228415	59228799	NM_022843	PCDH20	chr13	60887656	1659049
chr13	59420836	59421207	NM_022843	PCDH20	chr13	60887656	1466634
chr13	59491271	59492036	NM_022843	PCDH20	chr13	60887656	1396002
chr13	59572025	59572260	NM_022843	PCDH20	chr13	60887656	1315513
chr13	60620677	60621452	NM_022843	PCDH20	chr13	60887656	266591
chr13	61056979	61057321	NM_022843	PCDH20	chr13	60887656	169494
chr13	62615090	62615461	NM_022843	PCDH20	chr13	60887656	1727620
chr13	62780658	62781039	NM_022843	PCDH20	chr13	60887656	1893193
chr13	62942059	62942438	NM_022843	PCDH20	chr13	60887656	2054593
chr13	63397563	63397948	NM_022843	PCDH20	chr13	60887656	2510100
chr13	63559729	63560109	NM_022843	PCDH20	chr13	60887656	2672263
chr13	63583250	63583623	NM_022843	PCDH20	chr13	60887656	2695781
chr13	63755482	63755994	NM_022843	PCDH20	chr13	60887656	2868082
chr13	64229153	64229548	NM_022843	PCDH20	chr13	60887656	3341695
chr13	65320423	65320810	NM_022843	PCDH20	chr13	60887656	4432961
chr13	65395306	65395670	NM_022843	PCDH20	chr13	60887656	4507832
chr13	66332331	66332707	NM_080759	DACH1	chr13	71339331	5006812
chr13	66946751	66947122	NM_080759	DACH1	chr13	71339331	4392394
chr13	68507823	68508259	NM_080759	DACH1	chr13	71339331	2831290
chr13	69911610	69912057	NM_080759	DACH1	chr13	71339331	1427497
chr13	70321124	70321506	NM_080759	DACH1	chr13	71339331	1018016
chr13	72807266	72807641	NM_001730	KLF5	chr13	72531142	276312
chr13	73238106	73238478	NM_001730	KLF5	chr13	72531142	707150
chr13	73277627	73278201	NM_001730	KLF5	chr13	72531142	746772
chr13	73615027	73615381	NM_001730	KLF5	chr13	72531142	1084062
chr13	73891280	73891659	NM_203497	COMMD6	chr13	75009992	1118522
chr13	73936810	73937188	NM_203497	COMMD6	chr13	75009992	1072993
chr13	74587617	74587976	NM_203497	COMMD6	chr13	75009992	422195
chr13	74799009	74799411	NM_203497	COMMD6	chr13	75009992	210782
chr13	74808817	74809183	NM_203497	COMMD6	chr13	75009992	200992
chr13	75238793	75239162	NM_005358	LMO7	chr13	75092570	146408
chr13	76868875	76869367	NM_001040153	SLAIN1	chr13	77170470	301349
chr13	76991660	76992015	NM_001040153	SLAIN1	chr13	77170470	178632
chr13	77165563	77165763	NM_001040153	SLAIN1	chr13	77170470	4807
chr13	77335400	77335738	NM_001040153	SLAIN1	chr13	77170470	165099
chr13	77855105	77855489	NM_006237	POU4F1	chr13	78075696	220399
chr13	77895993	77896494	NM_006237	POU4F1	chr13	78075696	179452
chr13	78131404	78131605	NM_006237	POU4F1	chr13	78075696	55809
chr13	78262677	78263057	NM_006237	POU4F1	chr13	78075696	187171
chr13	78763100	78763472	NM_006237	POU4F1	chr13	78075696	687590
chr13	78920558	78920946	NM_006237	POU4F1	chr13	78075696	845056
chr13	78922055	78922354	NM_006237	POU4F1	chr13	78075696	846509
chr13	79131268	79131686	NM_006237	POU4F1	chr13	78075696	1055781
chr13	79578264	79578577	NM_006237	POU4F1	chr13	78075696	1502725
chr13	79629960	79630332	NM_006237	POU4F1	chr13	78075696	1554450
chr13	79707329	79707743	NM_006237	POU4F1	chr13	78075696	1631840
chr13	79782021	79782396	NM_006237	POU4F1	chr13	78075696	1706513
chr13	79832025	79832391	NM_006237	POU4F1	chr13	78075696	1756512
chr13	79864490	79864853	NM_006237	POU4F1	chr13	78075696	1788976
chr13	79942624	79942827	NM_006237	POU4F1	chr13	78075696	1867030
chr13	80034323	80035168	NM_006237	POU4F1	chr13	78075696	1959050
chr13	80268357	80268744	NM_006237	POU4F1	chr13	78075696	2192855
chr13	80453225	80453628	NM_006237	POU4F1	chr13	78075696	2377731
chr13	80865501	80865867	NM_052910	SLITRK1	chr13	83354529	2488845
chr13	81437582	81438001	NM_052910	SLITRK1	chr13	83354529	1916737
chr13	82823825	82824190	NM_052910	SLITRK1	chr13	83354529	530521
chr13	82852622	82853016	NM_052910	SLITRK1	chr13	83354529	501710
chr13	83047148	83047488	NM_052910	SLITRK1	chr13	83354529	307211
chr13	83298419	83298808	NM_052910	SLITRK1	chr13	83354529	55915
chr13	83355054	83355477	NM_052910	SLITRK1	chr13	83354529	737
chr13	83576353	83576741	NM_052910	SLITRK1	chr13	83354529	222018
chr13	83666645	83666930	NM_052910	SLITRK1	chr13	83354529	312259
chr13	84217339	84217598	NM_052910	SLITRK1	chr13	83354529	862940
chr13	84623946	84624371	NM_032229	SLITRK6	chr13	85271484	647325
chr13	84806313	84806688	NM_032229	SLITRK6	chr13	85271484	464983
chr13	85023962	85024360	NM_032229	SLITRK6	chr13	85271484	247323
chr13	85129969	85130369	NM_032229	SLITRK6	chr13	85271484	141315
chr13	86660869	86661400	NM_032229	SLITRK6	chr13	85271484	1389651
chr13	86709497	86710309	NM_032229	SLITRK6	chr13	85271484	1438419
chr13	87309446	87310444	NM_032229	SLITRK6	chr13	85271484	2038461
chr13	88161421	88161837	NM_032229	SLITRK6	chr13	85271484	2890145
chr13	88388129	88388725	NM_032229	SLITRK6	chr13	85271484	3116943
chr13	88947486	88947880	NM_032229	SLITRK6	chr13	85271484	3676199
chr13	88964693	88964933	NM_032229	SLITRK6	chr13	85271484	3693329
chr13	88972082	88972485	NM_032229	SLITRK6	chr13	85271484	3700800
chr13	89519711	89520104	NM_005708	GPC6	chr13	92677078	3157170
chr13	89569380	89569790	NM_005708	GPC6	chr13	92677078	3107493
chr13	89700083	89700276	NM_005708	GPC6	chr13	92677078	2976898
chr13	90533887	90534302	NM_005708	GPC6	chr13	92677078	2142983
chr13	90570262	90570646	NM_005708	GPC6	chr13	92677078	2106624
chr13	90771236	90771659	NM_005708	GPC6	chr13	92677078	1905630
chr13	91310540	91310925	NM_005708	GPC6	chr13	92677078	1366345
chr13	92319503	92320035	NM_005708	GPC6	chr13	92677078	357309
chr13	92818554	92818839	NM_005708	GPC6	chr13	92677078	141619
chr13	93090858	93091265	NM_005708	GPC6	chr13	92677078	413984
chr13	93441033	93441406	NM_005708	GPC6	chr13	92677078	764142
chr13	93484292	93484707	NM_005708	GPC6	chr13	92677078	807422
chr13	94587837	94588064	NM_005845	ABCC4	chr13	94751688	163737
chr13	94596741	94597079	NM_005845	ABCC4	chr13	94751688	154778
chr13	94646694	94647151	NM_005845	ABCC4	chr13	94751688	104765
chr13	94694695	94695048	NM_005845	ABCC4	chr13	94751688	56816
chr13	94967015	94967357	NM_005845	ABCC4	chr13	94751688	215498
chr13	94980422	94980904	NM_005845	ABCC4	chr13	94751688	228975
chr13	96026372	96026775	NM_144778	MBNL2	chr13	96672574	646000
chr13	97019200	97019557	NM_144778	MBNL2	chr13	96672574	346805
chr13	97397143	97397354	NM_005766	FARP1	chr13	97593434	196185
chr13	97666552	97666955	NM_005766	FARP1	chr13	97593434	73320
chr13	98921833	98922241	NM_015296	DOCK9	chr13	98536661	385376
chr13	99038473	99038937	NM_015296	DOCK9	chr13	98536661	502044
chr13	99126343	99126667	NM_015296	DOCK9	chr13	98536661	589844
chr13	99684200	99684712	NM_015296	DOCK9	chr13	98536661	1147795
chr13	99685653	99686324	NM_015296	DOCK9	chr13	98536661	1149328
chr13	99748902	99749113	NM_015296	DOCK9	chr13	98536661	1212347
chr13	99842214	99842822	NM_015296	DOCK9	chr13	98536661	1305857
chr13	100750500	100750867	NM_015296	DOCK9	chr13	98536661	2214023
chr13	100833872	100834214	NM_015296	DOCK9	chr13	98536661	2297382
chr13	101776878	101777279	NM_015296	DOCK9	chr13	98536661	3240418
chr13	102367488	102367879	NM_015296	DOCK9	chr13	98536661	3831023
chr13	104107691	104108109	NM_003749	IRS2	chr13	109236915	5129015
chr13	104945967	104946346	NM_003749	IRS2	chr13	109236915	4290758
chr13	105095127	105095319	NM_003749	IRS2	chr13	109236915	4141692
chr13	105650480	105650604	NM_003749	IRS2	chr13	109236915	3586373
chr13	105741025	105741470	NM_003749	IRS2	chr13	109236915	3495667
chr13	105746361	105746745	NM_003749	IRS2	chr13	109236915	3490362
chr13	105823663	105824040	NM_003749	IRS2	chr13	109236915	3413063
chr13	105986689	105987048	NM_003749	IRS2	chr13	109236915	3250046
chr13	106369942	106370347	NM_003749	IRS2	chr13	109236915	2866770
chr13	106606182	106606930	NM_003749	IRS2	chr13	109236915	2630359
chr13	107716654	107717061	NM_003749	IRS2	chr13	109236915	1520057
chr13	107859028	107859455	NM_003749	IRS2	chr13	109236915	1377673
chr13	108016916	108017283	NM_003749	IRS2	chr13	109236915	1219815
chr13	108343519	108344147	NM_003749	IRS2	chr13	109236915	893082
chr13	108386267	108386642	NM_003749	IRS2	chr13	109236915	850460
chr13	108563534	108563932	NM_003749	IRS2	chr13	109236915	673182
chr13	108842902	108843356	NM_003749	IRS2	chr13	109236915	393786
chr13	108850529	108850943	NM_003749	IRS2	chr13	109236915	386179
chr13	108876730	108877009	NM_003749	IRS2	chr13	109236915	360045
chr13	109102874	109103322	NM_003749	IRS2	chr13	109236915	133817
chr13	109104878	109105818	NM_003749	IRS2	chr13	109236915	131567
chr13	109118110	109118499	NM_003749	IRS2	chr13	109236915	118610
chr13	109209053	109209648	NM_003749	IRS2	chr13	109236915	27564
chr13	109350161	109350388	NM_003749	IRS2	chr13	109236915	113360
chr13	109678552	109678968	NM_003749	IRS2	chr13	109236915	441845
chr13	111793038	111793248	NM_005986	SOX1	chr13	111769913	23230
chr13	111800109	111800513	NM_005986	SOX1	chr13	111769913	30398
chr13	112359655	112359993	NM_006322	TUBGCP3	chr13	112290482	69342
chr13	112375406	112375730	NM_006322	TUBGCP3	chr13	112290482	85086
chr13	112458319	112458423	NM_006322	TUBGCP3	chr13	112290482	167889
chr13	112461357	112461744	NM_006322	TUBGCP3	chr13	112290482	171069
chr13	113914556	113914963	NM_017905	TMCO3	chr13	113193308	721452
chr14	20028516	20028908	NM_000270	PNP	chr14	20007377	21335
chr14	20411683	20411973	NM_005615	RNASE6	chr14	20319049	92779
chr14	21195303	21195662	NM_014828	TOX4	chr14	21015174	180309
chr14	21262587	21262793	NM_014828	TOX4	chr14	21015174	247516
chr14	21513341	21513691	NM_014828	TOX4	chr14	21015174	498342
chr14	21954391	21954727	NM_022060	ABHD4	chr14	22136986	182427
chr14	22085120	22085564	NM_022060	ABHD4	chr14	22136986	51644
chr14	25216090	25216475	NM_025081	NYNRIN	chr14	23937831	1278452
chr14	25613892	25614247	NM_025081	NYNRIN	chr14	23937831	1676239
chr14	25644164	25644551	NM_025081	NYNRIN	chr14	23937831	1706527
chr14	25791130	25791529	NM_025081	NYNRIN	chr14	23937831	1853499
chr14	26102075	26102502	NM_025081	NYNRIN	chr14	23937831	2164458
chr14	27669576	27669950	NM_002742	PRKD1	chr14	29466650	1796887
chr14	27679477	27679754	NM_002742	PRKD1	chr14	29466650	1787034
chr14	27858378	27858733	NM_002742	PRKD1	chr14	29466650	1608094
chr14	29458860	29459279	NM_002742	PRKD1	chr14	29466650	7580
chr14	30578951	30579403	NM_002742	PRKD1	chr14	29466650	1112527
chr14	31015175	31015556	NM_002742	PRKD1	chr14	29466650	1548716
chr14	31426869	31427434	NM_002742	PRKD1	chr14	29466650	1960502
chr14	32263878	32265260	NM_020529	NFKBIA	chr14	34943711	2679142
chr14	32480076	32480447	NM_020529	NFKBIA	chr14	34943711	2463449
chr14	33304267	33304657	NM_020529	NFKBIA	chr14	34943711	1639249
chr14	34711254	34711637	NM_020529	NFKBIA	chr14	34943711	232265
chr14	35511018	35511397	NM_020529	NFKBIA	chr14	34943711	567497
chr14	36055417	36055796	NM_006194	PAX9	chr14	36196523	140916
chr14	36295178	36295535	NM_006194	PAX9	chr14	36196523	98834
chr14	36299140	36299508	NM_006194	PAX9	chr14	36196523	102801
chr14	38066008	38066395	NM_006364	SEC23A	chr14	38642188	575986
chr14	38092092	38093001	NM_006364	SEC23A	chr14	38642188	549641
chr14	38373891	38374587	NM_006364	SEC23A	chr14	38642188	267949
chr14	40428030	40428407	NM_152447	LRFN5	chr14	41146513	718294
chr14	40443415	40443859	NM_152447	LRFN5	chr14	41146513	702876
chr14	41347323	41347648	NM_152447	LRFN5	chr14	41146513	200973
chr14	41595556	41595924	NM_152447	LRFN5	chr14	41146513	449227
chr14	41838623	41839066	NM_152447	LRFN5	chr14	41146513	692332
chr14	42038042	42038520	NM_152447	LRFN5	chr14	41146513	891768
chr14	42561295	42561457	NM_152447	LRFN5	chr14	41146513	1414863
chr14	43047624	43047999	NM_017658	KLHL28	chr14	44500929	1453117
chr14	43324833	43325348	NM_017658	KLHL28	chr14	44500929	1175838
chr14	43633878	43634264	NM_017658	KLHL28	chr14	44500929	866858
chr14	43760237	43760350	NM_017658	KLHL28	chr14	44500929	740635
chr14	44152319	44152701	NM_017658	KLHL28	chr14	44500929	348419
chr14	44178968	44179392	NM_017658	KLHL28	chr14	44500929	321749
chr14	44507676	44508262	NM_017658	KLHL28	chr14	44500929	7040
chr14	44820168	44820565	NM_017658	KLHL28	chr14	44500929	319438
chr14	45643720	45644087	NM_017658	KLHL28	chr14	44500929	1142975
chr14	46857566	46857952	NM_152329	PPIL5	chr14	49135164	2277405
chr14	46998439	46998702	NM_152329	PPIL5	chr14	49135164	2136593
chr14	47974957	47975365	NM_152329	PPIL5	chr14	49135164	1160003
chr14	48369061	48369533	NM_152329	PPIL5	chr14	49135164	765867
chr14	48855158	48855516	NM_152329	PPIL5	chr14	49135164	279827
chr14	49398569	49398962	NM_014315	KLHDC2	chr14	49304536	94230
chr14	50565591	50565952	NM_052978	TRIM9	chr14	50632172	66400
chr14	51143972	51144440	NM_001042481	FRMD6	chr14	51025604	118602
chr14	51651306	51651425	NM_007361	NID2	chr14	51605696	45670
chr14	53039126	53039499	NM_006832	FERMT2	chr14	52487565	551748
chr14	53273888	53274271	NM_005192	CDKN3	chr14	53933422	659342
chr14	53392377	53392757	NM_005192	CDKN3	chr14	53933422	540855
chr14	53431199	53431695	NM_005192	CDKN3	chr14	53933422	501975
chr14	53436660	53436839	NM_005192	CDKN3	chr14	53933422	496672
chr14	54260340	54260550	NM_000161	GCH1	chr14	54439292	178847
chr14	54584179	54584606	NM_000161	GCH1	chr14	54439292	145101
chr14	54587632	54588067	NM_000161	GCH1	chr14	54439292	148558
chr14	55254313	55254494	NM_000161	GCH1	chr14	54439292	815112
chr14	55277975	55278190	NM_017799	C14orf101	chr14	56116263	838180
chr14	55592473	55592924	NM_017799	C14orf101	chr14	56116263	523564
chr14	55913504	55913878	NM_017799	C14orf101	chr14	56116263	202572
chr14	55949032	55949613	NM_017799	C14orf101	chr14	56116263	166940
chr14	56362581	56362957	NM_017799	C14orf101	chr14	56116263	246506
chr14	56512773	56513170	NM_017799	C14orf101	chr14	56116263	396709
chr14	56580824	56581091	NM_017799	C14orf101	chr14	56116263	464695
chr14	56917532	56917763	NM_017799	C14orf101	chr14	56116263	801385
chr14	57416340	57416724	NM_018477	ACTR10	chr14	57736585	320053
chr14	57461805	57462182	NM_018477	ACTR10	chr14	57736585	274591
chr14	57535070	57535435	NM_018477	ACTR10	chr14	57736585	201332
chr14	57834075	57835026	NM_018477	ACTR10	chr14	57736585	97966
chr14	58189132	58189363	NM_016651	DACT1	chr14	58174509	14739
chr14	58505384	58505536	NM_014992	DAAM1	chr14	58725151	219691
chr14	59122245	59122794	NM_014992	DAAM1	chr14	58725151	397369
chr14	59688256	59688719	NM_016029	DHRS7	chr14	59701964	13476
chr14	60237883	60238214	NM_016029	DHRS7	chr14	59701964	536085
chr14	60371209	60371600	NM_016029	DHRS7	chr14	59701964	669441
chr14	60616933	60617342	NM_016029	DHRS7	chr14	59701964	915174
chr14	60667634	60667860	NM_016029	DHRS7	chr14	59701964	965783
chr14	60719767	60720229	NM_016029	DHRS7	chr14	59701964	1018034
chr14	62136218	62136588	NM_182914	SYNE2	chr14	63389435	1253032
chr14	62671993	62672394	NM_182914	SYNE2	chr14	63389435	717241
chr14	62740351	62740901	NM_182914	SYNE2	chr14	63389435	648809
chr14	63376703	63377078	NM_182914	SYNE2	chr14	63389435	12544
chr14	65111855	65112330	NM_021979	HSPA2	chr14	64076938	1035155
chr14	65942799	65943322	NM_016026	RDH11	chr14	67232263	1289202
chr14	66817141	66817324	NM_016026	RDH11	chr14	67232263	415030
chr14	67470796	67471256	NM_015346	ZFYVE26	chr14	67353059	117967
chr14	68086460	68086817	NM_004926	ZFP36L1	chr14	68329538	242899
chr14	68205618	68205989	NM_004926	ZFP36L1	chr14	68329538	123734
chr14	68219045	68219410	NM_004926	ZFP36L1	chr14	68329538	110310
chr14	68221254	68221622	NM_004926	ZFP36L1	chr14	68329538	108100
chr14	69289874	69290242	NM_003861	DCAF5	chr14	68689667	600391
chr14	70396433	70396651	NM_003861	DCAF5	chr14	68689667	1706875
chr14	70398439	70398811	NM_003861	DCAF5	chr14	68689667	1708958
chr14	70419367	70419936	NM_003861	DCAF5	chr14	68689667	1729985
chr14	70854676	70854802	NM_012074	DPF3	chr14	72430562	1575823
chr14	71987749	71988225	NM_012074	DPF3	chr14	72430562	442575
chr14	72429281	72429666	NM_012074	DPF3	chr14	72430562	1088
chr14	72551716	72552404	NM_021260	ZFYVE1	chr14	72563592	11532
chr14	73676891	73677278	NM_005589	ALDH6A1	chr14	73620949	56136
chr14	74517044	74517417	NM_014239	EIF2B2	chr14	74539364	22133
chr14	74767136	74767322	NM_014239	EIF2B2	chr14	74539364	227865
chr14	74797691	74797885	NM_014239	EIF2B2	chr14	74539364	258424
chr14	75849401	75849835	NM_024496	C14orf4	chr14	76564787	715169
chr14	75872342	75872979	NM_024496	C14orf4	chr14	76564787	692126
chr14	75965871	75966265	NM_024496	C14orf4	chr14	76564787	598719
chr14	75983034	75983423	NM_024496	C14orf4	chr14	76564787	581558
chr14	76054430	76054806	NM_024496	C14orf4	chr14	76564787	510169
chr14	76067776	76068392	NM_024496	C14orf4	chr14	76564787	496703
chr14	76256355	76256748	NM_024496	C14orf4	chr14	76564787	308235
chr14	76456195	76456586	NM_024496	C14orf4	chr14	76564787	108396
chr14	76619633	76620085	NM_024496	C14orf4	chr14	76564787	55072
chr14	77006490	77006900	NM_012111	AHSA1	chr14	76994125	12570
chr14	77033664	77034023	NM_012111	AHSA1	chr14	76994125	39719
chr14	77184609	77184988	NM_012111	AHSA1	chr14	76994125	190674
chr14	77378485	77378786	NM_012111	AHSA1	chr14	76994125	384511
chr14	79892969	79893663	NM_152446	C14orf145	chr14	80475637	582321
chr14	81095411	81095881	NM_152446	C14orf145	chr14	80475637	620009
chr14	81603355	81603749	NM_152446	C14orf145	chr14	80475637	1127915
chr14	81605313	81605703	NM_152446	C14orf145	chr14	80475637	1129871
chr14	81726500	81727247	NM_152446	C14orf145	chr14	80475637	1251237
chr14	81795684	81796221	NM_152446	C14orf145	chr14	80475637	1320316
chr14	82346763	82347377	NM_152446	C14orf145	chr14	80475637	1871433
chr14	82368953	82369390	NM_152446	C14orf145	chr14	80475637	1893535
chr14	82636563	82637465	NM_152446	C14orf145	chr14	80475637	2161377
chr14	82830114	82830488	NM_152446	C14orf145	chr14	80475637	2354664
chr14	82832655	82833005	NM_152446	C14orf145	chr14	80475637	2357193
chr14	83127951	83128323	NM_152446	C14orf145	chr14	80475637	2652500
chr14	83488891	83489258	NM_152446	C14orf145	chr14	80475637	3013438
chr14	83559947	83560361	NM_152446	C14orf145	chr14	80475637	3084517
chr14	83564194	83564805	NM_152446	C14orf145	chr14	80475637	3088863
chr14	83786962	83787338	NM_152446	C14orf145	chr14	80475637	3311513
chr14	83809094	83809668	NM_152446	C14orf145	chr14	80475637	3333744
chr14	83812709	83813062	NM_152446	C14orf145	chr14	80475637	3337249
chr14	84350656	84350776	NM_152446	C14orf145	chr14	80475637	3875079
chr14	84846875	84847476	NM_001085471	FOXN3	chr14	89155247	4308071
chr14	84989330	84989702	NM_001085471	FOXN3	chr14	89155247	4165731
chr14	85067999	85068347	NM_001085471	FOXN3	chr14	89155247	4087074
chr14	85607715	85608078	NM_001085471	FOXN3	chr14	89155247	3547350
chr14	85678060	85678479	NM_001085471	FOXN3	chr14	89155247	3476977
chr14	85721900	85722259	NM_001085471	FOXN3	chr14	89155247	3433167
chr14	85863649	85864153	NM_001085471	FOXN3	chr14	89155247	3291346
chr14	85902242	85902624	NM_001085471	FOXN3	chr14	89155247	3252814
chr14	86001522	86001905	NM_001085471	FOXN3	chr14	89155247	3153533
chr14	86049567	86049941	NM_001085471	FOXN3	chr14	89155247	3105493
chr14	86051106	86051455	NM_001085471	FOXN3	chr14	89155247	3103966
chr14	86202114	86202302	NM_001085471	FOXN3	chr14	89155247	2953039
chr14	86479759	86480052	NM_001085471	FOXN3	chr14	89155247	2675341
chr14	86847176	86847445	NM_001085471	FOXN3	chr14	89155247	2307936
chr14	86854031	86854634	NM_001085471	FOXN3	chr14	89155247	2300914
chr14	87307346	87307444	NM_001085471	FOXN3	chr14	89155247	1847852
chr14	88347867	88348229	NM_001085471	FOXN3	chr14	89155247	807199
chr14	89308678	89309049	NM_001085471	FOXN3	chr14	89155247	153617
chr14	89980660	89981052	NM_018319	TDP1	chr14	89491998	488858
chr14	89994561	89995413	NM_018319	TDP1	chr14	89491998	502989
chr14	90164629	90164998	NM_001102366	C14orf159	chr14	90650109	485295
chr14	90234694	90235027	NM_001102366	C14orf159	chr14	90650109	415248
chr14	90620619	90621039	NM_001102366	C14orf159	chr14	90650109	29280
chr14	90651632	90652199	NM_001102366	C14orf159	chr14	90650109	1807
chr14	90678392	90678766	NM_001102366	C14orf159	chr14	90650109	28470
chr14	90680998	90681259	NM_001102366	C14orf159	chr14	90650109	31020
chr14	90893919	90894220	NM_001102366	C14orf159	chr14	90650109	243961
chr14	90895540	90895879	NM_001102366	C14orf159	chr14	90650109	245601
chr14	91455282	91455652	NM_006329	FBLN5	chr14	91483799	28332
chr14	91715104	91715707	NM_006329	FBLN5	chr14	91483799	231607
chr14	93015140	93015337	NM_001002860	BTBD7	chr14	92869138	146101
chr14	93017848	93018209	NM_001002860	BTBD7	chr14	92869138	148891
chr14	93293292	93293535	NM_001002860	BTBD7	chr14	92869138	424276
chr14	93416163	93416517	NM_001002860	BTBD7	chr14	92869138	547202
chr14	95160103	95160416	NM_152327	AK7	chr14	95928200	767940
chr14	95274817	95275530	NM_152327	AK7	chr14	95928200	653026
chr14	95662277	95662671	NM_152327	AK7	chr14	95928200	265726
chr14	95793480	95794313	NM_152327	AK7	chr14	95928200	134303
chr14	96014126	96014527	NM_152327	AK7	chr14	95928200	86127
chr14	96041845	96042187	NM_152327	AK7	chr14	95928200	113816
chr14	96169333	96169826	NM_152327	AK7	chr14	95928200	241380
chr14	96196763	96197120	NM_152327	AK7	chr14	95928200	268742
chr14	96540974	96541277	NM_152327	AK7	chr14	95928200	612926
chr14	96601994	96602210	NM_152327	AK7	chr14	95928200	673902
chr14	96690232	96690505	NM_152327	AK7	chr14	95928200	762169
chr14	96751500	96751819	NM_152327	AK7	chr14	95928200	823460
chr14	96754446	96754855	NM_152327	AK7	chr14	95928200	826451
chr14	96771560	96771943	NM_152327	AK7	chr14	95928200	843552
chr14	96995009	96995370	NM_152327	AK7	chr14	95928200	1066990
chr14	97050190	97050717	NM_152327	AK7	chr14	95928200	1122254
chr14	97247799	97248193	NM_152327	AK7	chr14	95928200	1319796
chr14	97378451	97378918	NM_152327	AK7	chr14	95928200	1450485
chr14	97380761	97381145	NM_152327	AK7	chr14	95928200	1452753
chr14	97466355	97466687	NM_152327	AK7	chr14	95928200	1538321
chr14	98034761	98035134	NM_004184	WARS	chr14	99911680	1876732
chr14	99152943	99153345	NM_004184	WARS	chr14	99911680	758536
chr14	99155877	99156258	NM_004184	WARS	chr14	99911680	755612
chr14	99197355	99197749	NM_004184	WARS	chr14	99911680	714128
chr14	99604813	99604996	NM_004184	WARS	chr14	99911680	306775
chr14	99758187	99758526	NM_004184	WARS	chr14	99911680	153323
chr14	100225583	100225940	NM_004184	WARS	chr14	99911680	314082
chr14	101120199	101120563	NM_002719	PPP2R5C	chr14	101345892	225511
chr14	101132128	101132699	NM_002719	PPP2R5C	chr14	101345892	213478
chr14	101163075	101163281	NM_002719	PPP2R5C	chr14	101345892	182714
chr14	102059609	102059803	NM_152326	ANKRD9	chr14	102045881	13825
chr14	102061602	102061806	NM_152326	ANKRD9	chr14	102045881	15823
chr14	102228669	102228879	NM_152326	ANKRD9	chr14	102045881	182893
chr14	102614133	102614604	NM_152326	ANKRD9	chr14	102045881	568488
chr14	102806720	102807093	NM_001100119	XRCC3	chr14	103251576	444669
chr14	102844974	102845362	NM_001100119	XRCC3	chr14	103251576	406408
chr14	102918183	102918495	NM_001100119	XRCC3	chr14	103251576	333237
chr14	103143144	103143652	NM_001100119	XRCC3	chr14	103251576	108178
chr14	103161532	103161870	NM_001100119	XRCC3	chr14	103251576	89875
chr14	103312086	103312467	NM_001100119	XRCC3	chr14	103251576	60701
chr14	103395349	103395894	NM_001100119	XRCC3	chr14	103251576	144046
chr14	103760235	103760643	NM_001100119	XRCC3	chr14	103251576	508863
chr14	103763084	103763515	NM_001100119	XRCC3	chr14	103251576	511724
chr14	103771436	103771859	NM_001100119	XRCC3	chr14	103251576	520072
chr14	105167996	105168348	NM_001311	CRIP1	chr14	105024301	143871
chr14	105286666	105287082	NM_001311	CRIP1	chr14	105024301	262573
chr14	106027706	106027918	NM_001311	CRIP1	chr14	105024301	1003511
chr14	106083026	106083352	NM_001311	CRIP1	chr14	105024301	1058888
chr15	23742604	23742953	NM_003257	TJP1	chr15	27901998	4159219
chr15	23927917	23928311	NM_003257	TJP1	chr15	27901998	3973884
chr15	27633699	27634008	NM_003257	TJP1	chr15	27901998	268144
chr15	32414809	32415093	NM_181077	GOLGA8A	chr15	32469293	54342
chr15	32422264	32423010	NM_181077	GOLGA8A	chr15	32469293	46656
chr15	32670872	32671421	NM_001023567	GOLGA8B	chr15	32615514	55633
chr15	34973147	34973475	NM_172316	MEIS2	chr15	35178889	205578
chr15	35179555	35180141	NM_172316	MEIS2	chr15	35178889	959
chr15	35261512	35261884	NM_172316	MEIS2	chr15	35178889	82809
chr15	35830936	35831110	NM_152594	SPRED1	chr15	36332343	501320
chr15	35845268	35845726	NM_152594	SPRED1	chr15	36332343	486846
chr15	36148475	36149105	NM_152594	SPRED1	chr15	36332343	183553
chr15	36210346	36210685	NM_152594	SPRED1	chr15	36332343	121827
chr15	36326681	36327208	NM_152594	SPRED1	chr15	36332343	5398
chr15	36831567	36831964	NM_152594	SPRED1	chr15	36332343	499423
chr15	38156763	38157064	NM_001003940	BMF	chr15	38188367	31453
chr15	38171830	38172102	NM_001003940	BMF	chr15	38188367	16401
chr15	38172820	38173187	NM_001003940	BMF	chr15	38188367	15363
chr15	38986361	38986799	NM_020857	VPS18	chr15	38973919	12661
chr15	39258915	39259323	NM_007280	OIP5	chr15	39412111	152992
chr15	39340361	39340758	NM_007280	OIP5	chr15	39412111	71551
chr15	42284403	42284588	NM_032892	FRMD5	chr15	42274721	9775
chr15	42814717	42815235	NM_025137	SPG11	chr15	42743168	71808
chr15	42990594	42990960	NM_003104	SORD	chr15	43102632	111855
chr15	43117455	43117716	NM_003104	SORD	chr15	43102632	14954
chr15	43222228	43222483	NM_003104	SORD	chr15	43102632	119724
chr15	43350913	43351146	NM_001482	GATM	chr15	43458272	107242
chr15	43605592	43605947	NM_024063	SPATA5L1	chr15	43481810	123960
chr15	45442856	45443439	NM_205850	SLC24A5	chr15	46200460	757312
chr15	45501508	45501887	NM_205850	SLC24A5	chr15	46200460	698762
chr15	45804826	45805209	NM_205850	SLC24A5	chr15	46200460	395442
chr15	46026240	46026616	NM_205850	SLC24A5	chr15	46200460	174032
chr15	46199254	46199653	NM_205850	SLC24A5	chr15	46200460	1006
chr15	46496840	46497146	NM_000138	FBN1	chr15	46725277	228284
chr15	48434176	48434481	NM_003645	SLC27A2	chr15	48261684	172645
chr15	48448374	48449234	NM_003645	SLC27A2	chr15	48261684	187120
chr15	48886687	48886858	NM_003645	SLC27A2	chr15	48261684	625089
chr15	49531068	49531770	NM_002748	MAPK6	chr15	50098702	567283
chr15	53106174	53106624	NM_004748	CCPG1	chr15	53487834	381435
chr15	53818115	53818486	NM_130810	DYX1C1	chr15	53587724	230577
chr15	53850289	53850712	NM_130810	DYX1C1	chr15	53587724	262777
chr15	53865288	53865765	NM_130810	DYX1C1	chr15	53587724	277803
chr15	54536614	54536989	NM_130810	DYX1C1	chr15	53587724	949078
chr15	54981597	54981743	NM_130810	DYX1C1	chr15	53587724	1393946
chr15	55086969	55087570	NM_130810	DYX1C1	chr15	53587724	1499546
chr15	55214257	55214639	NM_130810	DYX1C1	chr15	53587724	1626724
chr15	55230210	55230438	NM_130810	DYX1C1	chr15	53587724	1642600
chr15	55310813	55311764	NM_130810	DYX1C1	chr15	53587724	1723565
chr15	55538025	55538435	NM_130810	DYX1C1	chr15	53587724	1950506
chr15	55617745	55618230	NM_130810	DYX1C1	chr15	53587724	2030264
chr15	55756176	55756591	NM_130810	DYX1C1	chr15	53587724	2168660
chr15	56411367	56411774	NM_130810	DYX1C1	chr15	53587724	2823847
chr15	56552531	56553158	NM_130810	DYX1C1	chr15	53587724	2965121
chr15	57526154	57526552	NM_000366	TPM1	chr15	61121890	3595537
chr15	57689592	57689786	NM_000366	TPM1	chr15	61121890	3432201
chr15	58653526	58653925	NM_000366	TPM1	chr15	61121890	2468164
chr15	59266960	59267122	NM_000366	TPM1	chr15	61121890	1854849
chr15	59528528	59528875	NM_000366	TPM1	chr15	61121890	1593188
chr15	59686583	59686952	NM_000366	TPM1	chr15	61121890	1435122
chr15	60805928	60806259	NM_000366	TPM1	chr15	61121890	315796
chr15	61549940	61550069	NM_000366	TPM1	chr15	61121890	428115
chr15	61689635	61690048	NM_014326	DAPK2	chr15	62125574	435732
chr15	61812340	61812592	NM_014326	DAPK2	chr15	62125574	313108
chr15	61860373	61860603	NM_014326	DAPK2	chr15	62125574	265086
chr15	62073561	62073910	NM_014326	DAPK2	chr15	62125574	51838
chr15	62095875	62096265	NM_014326	DAPK2	chr15	62125574	29504
chr15	62112384	62112638	NM_014326	DAPK2	chr15	62125574	13063
chr15	62724153	62724352	NM_002537	OAZ2	chr15	62782515	58262
chr15	63411685	63412047	NM_020962	IGDCC4	chr15	63502463	90597
chr15	64209940	64210323	NM_017858	TIPIN	chr15	64436108	225976
chr15	64229894	64230217	NM_017858	TIPIN	chr15	64436108	206052
chr15	64737496	64737877	NR_003105	ZWILCH	chr15	64584484	153203
chr15	64795140	64795528	NR_003105	ZWILCH	chr15	64584484	210850
chr15	65072504	65072924	NM_005902	SMAD3	chr15	65145248	72534
chr15	65236865	65237472	NM_005902	SMAD3	chr15	65145248	91921
chr15	65628282	65628716	NM_001031715	IQCH	chr15	65334191	294308
chr15	67163926	67164313	NM_001104554	PAQR5	chr15	67393795	229675
chr15	67610635	67611018	NM_001104554	PAQR5	chr15	67393795	217032
chr15	67936976	67937335	NM_001104554	PAQR5	chr15	67393795	543361
chr15	68262997	68263332	NM_001104554	PAQR5	chr15	67393795	869370
chr15	68388427	68388867	NM_024817	THSD4	chr15	69220841	832194
chr15	68613801	68614046	NM_024817	THSD4	chr15	69220841	606917
chr15	68849927	68851059	NM_024817	THSD4	chr15	69220841	370348
chr15	69027016	69027683	NM_024817	THSD4	chr15	69220841	193491
chr15	69038756	69039113	NM_024817	THSD4	chr15	69220841	181906
chr15	70754132	70754428	NM_000520	HEXA	chr15	70455574	298706
chr15	70758696	70759071	NM_000520	HEXA	chr15	70455574	303310
chr15	70765358	70765753	NM_000520	HEXA	chr15	70455574	309982
chr15	71132590	71132981	NM_002499	NEO1	chr15	71131877	909
chr15	71471959	71472389	NM_012428	NPTN	chr15	71712806	240632
chr15	71776426	71776831	NM_012428	NPTN	chr15	71712806	63823
chr15	72215995	72216514	NM_020851	ISLR2	chr15	72209795	6460
chr15	72307995	72308388	NM_005545	ISLR	chr15	72253139	55053
chr15	72822545	72822918	NM_006465	ARID3B	chr15	72620600	202132
chr15	72856501	72857044	NM_017793	RPP25	chr15	73036828	180055
chr15	74219411	74219814	NM_152335	C15orf27	chr15	74139353	80260
chr15	74952677	74952901	NM_032808	LINGO1	chr15	75711764	758975
chr15	75500242	75500819	NM_032808	LINGO1	chr15	75711764	211233
chr15	75796542	75796937	NM_032808	LINGO1	chr15	75711764	84976
chr15	75818195	75818370	NM_032808	LINGO1	chr15	75711764	106519
chr15	75855686	75855925	NM_032808	LINGO1	chr15	75711764	144042
chr15	75879796	75880172	NM_032808	LINGO1	chr15	75711764	168220
chr15	76582849	76583262	NM_004378	CRABP1	chr15	76419720	163336
chr15	76750913	76751438	NM_004378	CRABP1	chr15	76419720	331456
chr15	77242766	77243236	NM_004378	CRABP1	chr15	76419720	823281
chr15	77264608	77264920	NM_004378	CRABP1	chr15	76419720	845044
chr15	77774415	77774827	NM_022566	MESDC1	chr15	79080349	1305728
chr15	78008857	78009258	NM_022566	MESDC1	chr15	79080349	1071291
chr15	79376137	79376421	NM_022566	MESDC1	chr15	79080349	295930
chr15	81768628	81768996	NM_003027	SH3GL3	chr15	81907094	138282
chr15	81854006	81854277	NM_003027	SH3GL3	chr15	81907094	52952
chr15	81919668	81920061	NM_003027	SH3GL3	chr15	81907094	12771
chr15	82350302	82350791	NM_003027	SH3GL3	chr15	81907094	443453
chr15	82363813	82364122	NM_003027	SH3GL3	chr15	81907094	456874
chr15	83233529	83234184	NR_003246	GOLGA6L5	chr15	82861082	372775
chr15	83244039	83244429	NR_003246	GOLGA6L5	chr15	82861082	383152
chr15	83244940	83245220	NR_003246	GOLGA6L5	chr15	82861082	383998
chr15	83250686	83251058	NR_003246	GOLGA6L5	chr15	82861082	389790
chr15	83699180	83699473	NR_003246	GOLGA6L5	chr15	82861082	838245
chr15	83715637	83716018	NR_003246	GOLGA6L5	chr15	82861082	854746
chr15	84210021	84210189	NR_003246	GOLGA6L5	chr15	82861082	1349023
chr15	85132075	85132697	NM_022163	MRPL46	chr15	86811637	1679251
chr15	85558607	85558982	NM_022163	MRPL46	chr15	86811637	1252842
chr15	86740558	86741056	NM_022163	MRPL46	chr15	86811637	70830
chr15	87818829	87819196	NM_152259	C15orf42	chr15	87919821	100808
chr15	88203298	88203566	NM_020212	WDR93	chr15	88035031	168401
chr15	88378530	88378955	NM_002168	IDH2	chr15	88446712	67969
chr15	89007360	89007978	NM_000057	BLM	chr15	89061582	53913
chr15	89017647	89017829	NM_000057	BLM	chr15	89061582	43844
chr15	89391923	89392298	NM_003981	PRC1	chr15	89338808	53303
chr15	89399213	89399614	NM_003981	PRC1	chr15	89338808	60606
chr15	89425139	89425506	NM_003981	PRC1	chr15	89338808	86515
chr15	89468424	89468822	NM_003981	PRC1	chr15	89338808	129815
chr15	89934413	89934792	NM_003981	PRC1	chr15	89338808	595795
chr15	90149627	90149985	NM_003981	PRC1	chr15	89338808	810998
chr15	90152501	90153003	NM_003981	PRC1	chr15	89338808	813944
chr15	90640180	90640525	NM_003981	PRC1	chr15	89338808	1301545
chr15	90673239	90673599	NM_003981	PRC1	chr15	89338808	1334611
chr15	90869879	90870283	NM_003981	PRC1	chr15	89338808	1531273
chr15	92951458	92951838	NM_021005	NR2F2	chr15	94675114	1723466
chr15	93774142	93774344	NM_021005	NR2F2	chr15	94675114	900871
chr15	93778831	93779213	NM_021005	NR2F2	chr15	94675114	896092
chr15	93791033	93791446	NM_021005	NR2F2	chr15	94675114	883874
chr15	93948003	93948836	NM_021005	NR2F2	chr15	94675114	726694
chr15	94314254	94314723	NM_021005	NR2F2	chr15	94675114	360625
chr15	94332451	94332878	NM_021005	NR2F2	chr15	94675114	342449
chr15	94504505	94504898	NM_021005	NR2F2	chr15	94675114	170412
chr15	94514826	94515212	NM_021005	NR2F2	chr15	94675114	160095
chr15	94687347	94687990	NM_021005	NR2F2	chr15	94675114	12555
chr15	94953840	94954691	NM_021005	NR2F2	chr15	94675114	279152
chr15	95181679	95182056	NM_021005	NR2F2	chr15	94675114	506754
chr15	95411759	95412140	NM_021005	NR2F2	chr15	94675114	736836
chr15	96773403	96773766	NM_001040655	TTC23	chr15	97607338	833753
chr15	96893883	96894606	NM_001040655	TTC23	chr15	97607338	713093
chr15	97160201	97160755	NM_001040655	TTC23	chr15	97607338	446860
chr15	97377820	97378076	NM_001040655	TTC23	chr15	97607338	229390
chr15	97606945	97607424	NM_198243	ASB7	chr15	98960277	1353092
chr15	98145823	98146359	NM_001040655	TTC23	chr15	97607338	538753
chr15	98270025	98270389	NM_001040655	TTC23	chr15	97607338	662869
chr15	99485315	99485537	NM_203472	SELS	chr15	99635223	149797
chr15	99692117	99692272	NM_203472	SELS	chr15	99635223	56972
chr15	100142084	100143055	NM_203472	SELS	chr15	99635223	507347
chr15	100160342	100160714	NM_203472	SELS	chr15	99635223	525305
chr16	914753	915366	NM_022092	CHTF18	chr16	778622	136438
chr16	1236892	1237196	NM_032520	GNPTG	chr16	1341900	104856
chr16	3024475	3024854	NM_024339	THOC6	chr16	3014032	10633
chr16	3149131	3149507	NM_024339	THOC6	chr16	3014032	135287
chr16	3178097	3178478	NM_024339	THOC6	chr16	3014032	164256
chr16	3879270	3879560	NM_004380	CREBBP	chr16	3870122	9293
chr16	3920684	3921109	NM_004380	CREBBP	chr16	3870122	50775
chr16	4043730	4044416	NM_001116	ADCY9	chr16	4106187	62114
chr16	4172812	4173217	NM_001116	ADCY9	chr16	4106187	66828
chr16	8510767	8511132	NM_000833	GRIN2A	chr16	10184112	1673162
chr16	8566714	8566935	NM_000833	GRIN2A	chr16	10184112	1617287
chr16	9034946	9035328	NM_000833	GRIN2A	chr16	10184112	1148975
chr16	9186921	9187345	NM_000833	GRIN2A	chr16	10184112	996979
chr16	9200687	9201060	NM_000833	GRIN2A	chr16	10184112	983238
chr16	9394311	9394747	NM_000833	GRIN2A	chr16	10184112	789583
chr16	9395635	9396093	NM_000833	GRIN2A	chr16	10184112	788248
chr16	9569015	9569528	NM_000833	GRIN2A	chr16	10184112	614840
chr16	10519848	10520367	NM_001424	EMP2	chr16	10582040	61932
chr16	10616108	10616489	NM_001424	EMP2	chr16	10582040	34259
chr16	10914013	10914372	NM_001424	EMP2	chr16	10582040	332153
chr16	11081105	11081498	NM_003745	SOCS1	chr16	11257540	176238
chr16	11363297	11363728	NM_003745	SOCS1	chr16	11257540	105973
chr16	11589970	11590355	NM_003745	SOCS1	chr16	11257540	332623
chr16	11604529	11605206	NM_003745	SOCS1	chr16	11257540	347328
chr16	11919421	11919817	NM_003745	SOCS1	chr16	11257540	662079
chr16	12093159	12093843	NM_003745	SOCS1	chr16	11257540	835961
chr16	12106289	12106747	NM_003745	SOCS1	chr16	11257540	848978
chr16	12407359	12407775	NM_003745	SOCS1	chr16	11257540	1150027
chr16	12711103	12711559	NM_003745	SOCS1	chr16	11257540	1453791
chr16	12880284	12880650	NM_003745	SOCS1	chr16	11257540	1622927
chr16	13140593	13141206	NM_003745	SOCS1	chr16	11257540	1883360
chr16	13263840	13264164	NM_003745	SOCS1	chr16	11257540	2006462
chr16	13459179	13459515	NM_014647	KIAA0430	chr16	15644510	2185163
chr16	13799228	13799613	NM_014647	KIAA0430	chr16	15644510	1845089
chr16	13855505	13855864	NM_014647	KIAA0430	chr16	15644510	1788825
chr16	15892755	15893258	NM_017668	NDE1	chr16	15651583	241424
chr16	17401824	17402190	NM_024847	TMC7	chr16	18902756	1500749
chr16	17561873	17562225	NM_024847	TMC7	chr16	18902756	1340707
chr16	17748152	17749251	NM_024847	TMC7	chr16	18902756	1154054
chr16	19383774	19383940	NM_001105248	TMC5	chr16	19329557	54300
chr16	19409418	19409785	NM_001105248	TMC5	chr16	19329557	80045
chr16	19696463	19696796	NM_016235	GPRC5B	chr16	19803652	107022
chr16	20725039	20725448	NM_173475	DCUN1D3	chr16	20819062	93818
chr16	21050158	21050484	NM_020422	TMEM159	chr16	21077412	27091
chr16	21483231	21483608	NM_020422	TMEM159	chr16	21077412	406008
chr16	22034589	22034968	NM_020422	TMEM159	chr16	21077412	957367
chr16	22874241	22874645	NM_020718	USP31	chr16	23068092	193649
chr16	23087890	23088271	NM_001039	SCNN1G	chr16	23101540	13459
chr16	23100485	23100616	NM_001039	SCNN1G	chr16	23101540	989
chr16	23178941	23179325	NM_001039	SCNN1G	chr16	23101540	77593
chr16	23251991	23252143	NM_001039	SCNN1G	chr16	23101540	150527
chr16	23262210	23262318	NM_001039	SCNN1G	chr16	23101540	160724
chr16	23296056	23296652	NM_001039	SCNN1G	chr16	23101540	194814
chr16	23637384	23637752	NM_001039	SCNN1G	chr16	23101540	536028
chr16	23656192	23656545	NM_001039	SCNN1G	chr16	23101540	554829
chr16	23667915	23668020	NM_001039	SCNN1G	chr16	23101540	566428
chr16	23776273	23776827	NM_001039	SCNN1G	chr16	23101540	675010
chr16	23785554	23785955	NM_001039	SCNN1G	chr16	23101540	684215
chr16	23800499	23800990	NM_001039	SCNN1G	chr16	23101540	699205
chr16	23819967	23820618	NM_001039	SCNN1G	chr16	23101540	718753
chr16	23821448	23821615	NM_001039	SCNN1G	chr16	23101540	719992
chr16	23940127	23940296	NM_001039	SCNN1G	chr16	23101540	838672
chr16	24231871	24232096	NM_001006634	ARHGAP17	chr16	24934176	702192
chr16	24421861	24422053	NM_001006634	ARHGAP17	chr16	24934176	512219
chr16	24791860	24792243	NM_001006634	ARHGAP17	chr16	24934176	142124
chr16	24938987	24939222	NM_001006634	ARHGAP17	chr16	24934176	4929
chr16	25208116	25208548	NM_001006634	ARHGAP17	chr16	24934176	274156
chr16	25210564	25210949	NM_001006634	ARHGAP17	chr16	24934176	276581
chr16	25352511	25352998	NM_001006634	ARHGAP17	chr16	24934176	418579
chr16	25376504	25376693	NM_001006634	ARHGAP17	chr16	24934176	442423
chr16	25384037	25384605	NM_001006634	ARHGAP17	chr16	24934176	450145
chr16	25648977	25649310	NM_001006634	ARHGAP17	chr16	24934176	714968
chr16	25653129	25653531	NM_001006634	ARHGAP17	chr16	24934176	719154
chr16	25718716	25719095	NM_001006634	ARHGAP17	chr16	24934176	784730
chr16	25737973	25738531	NM_001006634	ARHGAP17	chr16	24934176	804076
chr16	25970702	25970897	NM_001006634	ARHGAP17	chr16	24934176	1036624
chr16	26290126	26290456	NM_001006634	ARHGAP17	chr16	24934176	1356115
chr16	26497705	26498191	NM_001006634	ARHGAP17	chr16	24934176	1563772
chr16	26628510	26629021	NM_001006634	ARHGAP17	chr16	24934176	1694590
chr16	26640827	26641058	NM_001006634	ARHGAP17	chr16	24934176	1706767
chr16	26646650	26647080	NM_001006634	ARHGAP17	chr16	24934176	1712689
chr16	26721902	26722321	NM_001006634	ARHGAP17	chr16	24934176	1787936
chr16	27245803	27246499	NM_003321	TUFM	chr16	28765230	1519079
chr16	27672374	27672699	NM_003321	TUFM	chr16	28765230	1092693
chr16	30566218	30566568	NM_152458	ZNF785	chr16	30504511	61882
chr16	30595995	30596540	NM_000294	PHKG2	chr16	30667120	70852
chr16	30617980	30618390	NM_000294	PHKG2	chr16	30667120	48935
chr16	30802973	30803564	NM_152288	ORAI3	chr16	30867905	64636
chr16	30822368	30822796	NM_152288	ORAI3	chr16	30867905	45323
chr16	31101139	31101672	NM_004604	STX4	chr16	30952403	149003
chr16	31102832	31103445	NM_004604	STX4	chr16	30952403	150736
chr16	31180928	31181333	NM_004604	STX4	chr16	30952403	228728
chr16	31188286	31188977	NM_004604	STX4	chr16	30952403	236229
chr16	45164645	45165208	NM_014321	ORC6L	chr16	45281058	116131
chr16	45227949	45228316	NM_014321	ORC6L	chr16	45281058	52925
chr16	45462328	45462648	NM_014321	ORC6L	chr16	45281058	181430
chr16	45618539	45618765	NM_014321	ORC6L	chr16	45281058	337594
chr16	46115130	46116499	NM_014321	ORC6L	chr16	45281058	834757
chr16	47305119	47305369	NM_015069	ZNF423	chr16	48418419	1113175
chr16	48292466	48292908	NM_015069	ZNF423	chr16	48418419	125732
chr16	48324497	48325336	NM_015069	ZNF423	chr16	48418419	93502
chr16	48433783	48433926	NM_015069	ZNF423	chr16	48418419	15436
chr16	50023149	50023515	NM_002968	SALL1	chr16	49742684	280648
chr16	50030371	50030753	NM_002968	SALL1	chr16	49742684	287878
chr16	50215717	50216090	NM_002968	SALL1	chr16	49742684	473220
chr16	50229039	50229438	NM_002968	SALL1	chr16	49742684	486555
chr16	50244998	50245400	NM_002968	SALL1	chr16	49742684	502515
chr16	50463067	50463546	NM_002968	SALL1	chr16	49742684	720623
chr16	50545799	50546195	NM_002968	SALL1	chr16	49742684	803313
chr16	50558928	50559727	NM_002968	SALL1	chr16	49742684	816644
chr16	50559845	50560953	NM_002968	SALL1	chr16	49742684	817715
chr16	51042060	51042420	NM_001012398	AKTIP	chr16	52094671	1052431
chr16	51633115	51633456	NM_001012398	AKTIP	chr16	52094671	461385
chr16	51685344	51685928	NM_001012398	AKTIP	chr16	52094671	409035
chr16	51688586	51688967	NM_001012398	AKTIP	chr16	52094671	405894
chr16	52439579	52439981	NM_001080432	FTO	chr16	52295375	144405
chr16	52642236	52642637	NM_001080432	FTO	chr16	52295375	347062
chr16	52746626	52746986	NM_001080432	FTO	chr16	52295375	451431
chr16	53047795	53048171	NM_001080432	FTO	chr16	52295375	752608
chr16	53066578	53066828	NM_001080432	FTO	chr16	52295375	771328
chr16	53095907	53096307	NM_001080432	FTO	chr16	52295375	800732
chr16	53213483	53214055	NM_004530	MMP2	chr16	54070581	856812
chr16	53320852	53321237	NM_004530	MMP2	chr16	54070581	749536
chr16	53916370	53916997	NM_004530	MMP2	chr16	54070581	153897
chr16	54040005	54040388	NM_004530	MMP2	chr16	54070581	30384
chr16	54353957	54354436	NM_004530	MMP2	chr16	54070581	283616
chr16	54422128	54422340	NM_004530	MMP2	chr16	54070581	351653
chr16	54426957	54427239	NM_004530	MMP2	chr16	54070581	356517
chr16	56014575	56014727	NM_018110	DOK4	chr16	56077886	63235
chr16	56429944	56430448	NM_024598	C16orf57	chr16	56592805	162609
chr16	56438524	56438934	NM_024598	C16orf57	chr16	56592805	154076
chr16	56440166	56440650	NM_024598	C16orf57	chr16	56592805	152397
chr16	56442143	56442542	NM_024598	C16orf57	chr16	56592805	150462
chr16	56922673	56923181	NM_001126129	GINS3	chr16	56983798	60871
chr16	57732381	57732744	NM_018231	SLC38A7	chr16	57276175	456388
chr16	58373620	58374188	NM_018231	SLC38A7	chr16	57276175	1097729
chr16	58800818	58801179	NM_018231	SLC38A7	chr16	57276175	1524824
chr16	58818705	58818910	NM_018231	SLC38A7	chr16	57276175	1542633
chr16	59231583	59232345	NM_001796	CDH8	chr16	60627537	1395573
chr16	59550648	59551015	NM_001796	CDH8	chr16	60627537	1076705
chr16	59615460	59616001	NM_001796	CDH8	chr16	60627537	1011806
chr16	60220442	60220810	NM_001796	CDH8	chr16	60627537	406911
chr16	60257146	60257383	NM_001796	CDH8	chr16	60627537	370272
chr16	60327363	60327652	NM_001796	CDH8	chr16	60627537	300029
chr16	60444141	60444348	NM_001796	CDH8	chr16	60627537	183292
chr16	60447154	60447580	NM_001796	CDH8	chr16	60627537	180170
chr16	60680465	60680707	NM_001796	CDH8	chr16	60627537	53049
chr16	60948690	60949123	NM_001796	CDH8	chr16	60627537	321370
chr16	60988310	60988886	NM_001796	CDH8	chr16	60627537	361061
chr16	61447116	61447481	NM_001796	CDH8	chr16	60627537	819762
chr16	61473228	61474056	NM_001796	CDH8	chr16	60627537	846105
chr16	61830100	61830477	NM_001796	CDH8	chr16	60627537	1202752
chr16	61914356	61915056	NM_001796	CDH8	chr16	60627537	1287169
chr16	61957101	61957605	NM_001796	CDH8	chr16	60627537	1329816
chr16	62932673	62933424	NM_001797	CDH11	chr16	63713420	780371
chr16	63253957	63254322	NM_001797	CDH11	chr16	63713420	459280
chr16	63278502	63278916	NM_001797	CDH11	chr16	63713420	434711
chr16	63288292	63288694	NM_001797	CDH11	chr16	63713420	424927
chr16	63465497	63465879	NM_001797	CDH11	chr16	63713420	247732
chr16	63562602	63563255	NM_001797	CDH11	chr16	63713420	150491
chr16	63584438	63584810	NM_001797	CDH11	chr16	63713420	128796
chr16	64133019	64133430	NM_001797	CDH11	chr16	63713420	419805
chr16	64135266	64135641	NM_001797	CDH11	chr16	63713420	422034
chr16	64141706	64142192	NM_001797	CDH11	chr16	63713420	428529
chr16	64424854	64425104	NM_001797	CDH11	chr16	63713420	711559
chr16	64514330	64514644	NM_004614	TK2	chr16	65141816	627329
chr16	64533409	64533804	NM_004614	TK2	chr16	65141816	608209
chr16	64616911	64617271	NM_004614	TK2	chr16	65141816	524725
chr16	64774843	64775198	NM_004614	TK2	chr16	65141816	366795
chr16	64939065	64939232	NM_004614	TK2	chr16	65141816	202667
chr16	64944791	64945237	NM_004614	TK2	chr16	65141816	196802
chr16	64954593	64955073	NM_004614	TK2	chr16	65141816	186983
chr16	65183556	65183965	NM_004614	TK2	chr16	65141816	41945
chr16	65616097	65616457	NM_001755	CBFB	chr16	65620550	4273
chr16	65899421	65899651	NM_000196	HSD11B2	chr16	66022536	123000
chr16	66601497	66601659	NM_018380	DDX28	chr16	66615271	13693
chr16	67483178	67483566	NM_004360	CDH1	chr16	67328695	154677
chr16	67531251	67532113	NM_005329	HAS3	chr16	67698943	167261
chr16	67771318	67771886	NM_006750	SNTB2	chr16	67778550	6948
chr16	68749961	68750348	NM_000903	NQO1	chr16	68318034	432121
chr16	69661562	69661870	NM_001740	CALB2	chr16	69950126	288410
chr16	71217220	71217585	NM_006885	ZFHX3	chr16	71639775	422372
chr16	72184805	72185179	NM_006885	ZFHX3	chr16	71639775	545217
chr16	73061479	73061907	NM_018124	RFWD3	chr16	73258280	196587
chr16	73134047	73134448	NM_018124	RFWD3	chr16	73258280	124032
chr16	73150212	73150975	NM_018124	RFWD3	chr16	73258280	107686
chr16	73152348	73152813	NM_018124	RFWD3	chr16	73258280	105699
chr16	73896621	73897046	NM_001077419	TMEM231	chr16	74147671	250837
chr16	73925078	73925677	NM_001077419	TMEM231	chr16	74147671	222293
chr16	73990509	73991524	NM_001077419	TMEM231	chr16	74147671	156654
chr16	75895169	75895529	NM_005548	KARS	chr16	74239086	1656263
chr16	76187368	76188376	NM_005548	KARS	chr16	74239086	1948786
chr16	76689668	76689895	NM_001031804	MAF	chr16	78192123	1502341
chr16	76960066	76960469	NM_001031804	MAF	chr16	78192123	1231855
chr16	77521480	77521678	NM_001031804	MAF	chr16	78192123	670544
chr16	77576136	77577105	NM_001031804	MAF	chr16	78192123	615502
chr16	78193116	78193497	NM_001031804	MAF	chr16	78192123	1184
chr16	78347723	78348113	NM_001031804	MAF	chr16	78192123	155795
chr16	79145443	79145871	NM_001031804	MAF	chr16	78192123	953534
chr16	79155454	79155896	NM_001031804	MAF	chr16	78192123	963552
chr16	79161205	79161588	NM_001031804	MAF	chr16	78192123	969274
chr16	79720139	79720581	NM_001031804	MAF	chr16	78192123	1528237
chr16	79965647	79965895	NM_001031804	MAF	chr16	78192123	1773648
chr16	80091187	80091417	NM_001031804	MAF	chr16	78192123	1899179
chr16	80319484	80319966	NM_001031804	MAF	chr16	78192123	2127602
chr16	80704326	80704678	NM_020947	KIAA1609	chr16	83095789	2391287
chr16	80736965	80737348	NM_020947	KIAA1609	chr16	83095789	2358632
chr16	80743908	80744308	NM_020947	KIAA1609	chr16	83095789	2351681
chr16	80794581	80794947	NM_020947	KIAA1609	chr16	83095789	2301025
chr16	80850935	80851543	NM_020947	KIAA1609	chr16	83095789	2244550
chr16	85184479	85184783	NM_014615	KIAA0182	chr16	84204424	980207
chr16	85867009	85867393	NM_020655	JPH3	chr16	86193999	326798
chr16	86183803	86184088	NM_020655	JPH3	chr16	86193999	10053
chr16	86371791	86372221	NM_003486	SLC7A5	chr16	86460601	88595
chr16	86463828	86464196	NM_003486	SLC7A5	chr16	86460601	3411
chr16	87910167	87910553	NM_003119	SPG7	chr16	88102305	191945
chr16	88210547	88210945	NM_153025	C16orf55	chr16	88251710	40964
chr17	231062	231445	NM_024792	FAM57A	chr17	582596	351342
chr17	2412211	2412604	NM_015229	KIAA0664	chr17	2561677	149269
chr17	3635400	3635791	NM_031965	GSG2	chr17	3573945	61651
chr17	3636772	3637118	NM_031965	GSG2	chr17	3573945	63000
chr17	4244524	4245003	NM_014520	MYBBP1A	chr17	4405430	160666
chr17	5561097	5561556	NM_001212	C1QBP	chr17	5283195	278132
chr17	5938181	5939000	NM_001212	C1QBP	chr17	5283195	655396
chr17	6340349	6340725	NM_017523	XAF1	chr17	6599879	259342
chr17	6962505	6962728	NM_201566	SLC16A13	chr17	6880117	82500
chr17	6976607	6977091	NM_000018	ACADVL	chr17	7063876	87027
chr17	7212492	7212869	NM_178518	TMEM102	chr17	7279485	66804
chr17	7268455	7268825	NM_178518	TMEM102	chr17	7279485	10845
chr17	7392071	7392431	NM_172089	TNFSF12-TNFSF13	chr17	7393139	888
chr17	7426124	7426470	NM_015670	SENP3	chr17	7406042	20255
chr17	7888017	7888176	NM_203411	TMEM88	chr17	7699108	188989
chr17	8030857	8031091	NM_012393	PFAS	chr17	8093320	62346
chr17	8233060	8233232	NM_012393	PFAS	chr17	8093320	139826
chr17	8262512	8262881	NM_012393	PFAS	chr17	8093320	169377
chr17	8504594	8504989	NM_012393	PFAS	chr17	8093320	411472
chr17	8569469	8569890	NM_012393	PFAS	chr17	8093320	476360
chr17	8923492	8924223	NM_012393	PFAS	chr17	8093320	830538
chr17	8950394	8950548	NM_012393	PFAS	chr17	8093320	857151
chr17	9055112	9055730	NM_012393	PFAS	chr17	8093320	962101
chr17	10583257	10583459	NM_018127	ELAC2	chr17	12862106	2278748
chr17	10616996	10617479	NM_018127	ELAC2	chr17	12862106	2244868
chr17	11089099	11089775	NM_018127	ELAC2	chr17	12862106	1772669
chr17	11359204	11359579	NM_018127	ELAC2	chr17	12862106	1502714
chr17	12011863	12011987	NM_018127	ELAC2	chr17	12862106	850181
chr17	12403013	12403468	NM_018127	ELAC2	chr17	12862106	458865
chr17	12771546	12771927	NM_018127	ELAC2	chr17	12862106	90369
chr17	13428477	13428855	NM_018127	ELAC2	chr17	12862106	566560
chr17	13892295	13892632	NM_018127	ELAC2	chr17	12862106	1030358
chr17	14259654	14260033	NM_000304	PMP22	chr17	15109369	849525
chr17	15112767	15113148	NM_000304	PMP22	chr17	15109369	3589
chr17	15228105	15228560	NM_000304	PMP22	chr17	15109369	118964
chr17	15782130	15782525	NM_181716	CENPV	chr17	16197537	415209
chr17	16164056	16164359	NM_181716	CENPV	chr17	16197537	33329
chr17	17427477	17428018	NM_018019	MED9	chr17	17321024	106724
chr17	17434604	17435493	NM_018019	MED9	chr17	17321024	114025
chr17	17628036	17628411	NM_001082968	TOM1L2	chr17	17816509	188285
chr17	17712904	17713287	NM_001082968	TOM1L2	chr17	17816509	103413
chr17	20097991	20098346	NM_001033553	CYTSB	chr17	19930926	167243
chr17	20101303	20101704	NM_001033553	CYTSB	chr17	19930926	170578
chr17	20451244	20451637	NM_015510	DHRS7B	chr17	20970849	519408
chr17	22699247	22699782	NM_015626	WSB1	chr17	22645232	54283
chr17	22706645	22706874	NM_015626	WSB1	chr17	22645232	61528
chr17	22758463	22758839	NM_015626	WSB1	chr17	22645232	113419
chr17	22791700	22792094	NM_015626	WSB1	chr17	22645232	146665
chr17	22902313	22902526	NM_015626	WSB1	chr17	22645232	257188
chr17	23700610	23701023	NM_014573	TMEM97	chr17	23670247	30570
chr17	24254693	24254849	NM_144683	DHRS13	chr17	24254215	556
chr17	24762995	24763351	NM_001033561	PHF12	chr17	24302634	460539
chr17	25130121	25130486	NM_001033561	PHF12	chr17	24302634	827670
chr17	25301232	25301625	NM_024857	ATAD5	chr17	26183148	881719
chr17	25386574	25386777	NM_024857	ATAD5	chr17	26183148	796472
chr17	25392239	25392454	NM_024857	ATAD5	chr17	26183148	790801
chr17	25406300	25406671	NM_024857	ATAD5	chr17	26183148	776662
chr17	26009778	26010164	NM_024857	ATAD5	chr17	26183148	173177
chr17	26228250	26228636	NM_024857	ATAD5	chr17	26183148	45295
chr17	27843829	27844185	NM_003885	CDK5R1	chr17	27838217	5790
chr17	28299084	28299376	NM_183377	ACCN1	chr17	28644119	344889
chr17	28503906	28504306	NM_183377	ACCN1	chr17	28644119	140013
chr17	28620551	28620984	NM_183377	ACCN1	chr17	28644119	23351
chr17	28624491	28624864	NM_183377	ACCN1	chr17	28644119	19441
chr17	29035191	29035666	NM_183377	ACCN1	chr17	28644119	391310
chr17	30697536	30697912	NM_144975	SLFN5	chr17	30594198	103526
chr17	30785495	30785929	NM_144975	SLFN5	chr17	30594198	191514
chr17	30827509	30827894	NM_144975	SLFN5	chr17	30594198	233504
chr17	32072719	32073084	NM_025109	MYO19	chr17	31965418	107484
chr17	32180020	32180729	NM_025109	MYO19	chr17	31965418	214957
chr17	32278333	32278683	NM_025109	MYO19	chr17	31965418	313090
chr17	32281134	32281694	NM_025109	MYO19	chr17	31965418	315996
chr17	32295849	32296236	NM_025109	MYO19	chr17	31965418	330625
chr17	32432665	32433035	NM_025109	MYO19	chr17	31965418	467432
chr17	33274949	33275323	NM_002795	PSMB3	chr17	34162527	887391
chr17	33800291	33800683	NM_002795	PSMB3	chr17	34162527	362040
chr17	33976451	33976902	NM_002795	PSMB3	chr17	34162527	185850
chr17	34161402	34161826	NM_002795	PSMB3	chr17	34162527	913
chr17	34435667	34436018	NM_006148	LASP1	chr17	34279637	156206
chr17	34436728	34437092	NM_006148	LASP1	chr17	34279637	157273
chr17	34527684	34528100	NM_006148	LASP1	chr17	34279637	248255
chr17	35732164	35733034	NM_000964	RARA	chr17	35718971	13628
chr17	35946515	35946909	NM_001552	IGFBP4	chr17	35853201	93511
chr17	35948788	35949170	NM_001552	IGFBP4	chr17	35853201	95778
chr17	36160080	36160568	NM_003079	SMARCE1	chr17	36057629	102695
chr17	36316869	36317267	NM_033188	KRTAP4-5	chr17	36559580	242512
chr17	36554771	36554964	NM_033188	KRTAP4-5	chr17	36559580	4712
chr17	36557437	36557828	NM_033188	KRTAP4-5	chr17	36559580	1947
chr17	36672849	36673236	NM_033188	KRTAP4-5	chr17	36559580	113463
chr17	36976909	36977562	NM_002230	JUP	chr17	37196490	219254
chr17	37146757	37147066	NM_002230	JUP	chr17	37196490	49578
chr17	37363058	37363434	NM_001096	ACLY	chr17	37328798	34448
chr17	37588621	37589162	NM_001096	ACLY	chr17	37328798	260094
chr17	38168717	38168943	NM_003766	BECN1	chr17	38229836	61006
chr17	38995480	38995896	NM_004090	DUSP3	chr17	39211894	216206
chr17	38996047	38996589	NM_004090	DUSP3	chr17	39211894	215576
chr17	39538857	39539109	NM_005474	HDAC5	chr17	39556540	17557
chr17	39569801	39570134	NM_005474	HDAC5	chr17	39556540	13428
chr17	39696314	39696871	NM_016016	SLC25A39	chr17	39757743	61150
chr17	39981651	39982056	NM_145663	DBF4B	chr17	40141501	159647
chr17	40075482	40075874	NM_145663	DBF4B	chr17	40141501	65823
chr17	40341766	40342158	NM_005497	GJC1	chr17	40263133	78829
chr17	40422576	40423266	NM_024722	ACBD4	chr17	40568539	145618
chr17	40424380	40424855	NM_024722	ACBD4	chr17	40568539	143921
[truncated: 5,173 more rows]

## Sheet: EWS502_FLI1
Peak_chr	Peak_start	Peak_stop	Nearest_DifferentiallyExpressed_RefSeqID	Nearest_DifferentiallyExpressed_GeneSymbol	Nearest_DifferentiallyExpressed_RefSeq_chr	Nearest_DifferentiallyExpressed_RefSeq_TSS	Distance_PeakMidpoint_TSS_bp
chr10	361601	363200	NM_002627	PFKP	chr10	3099751	2737350
chr10	546651	547900	NM_002627	PFKP	chr10	3099751	2552475
chr10	695251	696500	NM_002627	PFKP	chr10	3099751	2403875
chr10	735251	736550	NM_002627	PFKP	chr10	3099751	2363850
chr10	811451	812800	NM_002627	PFKP	chr10	3099751	2287625
chr10	979901	981400	NM_002627	PFKP	chr10	3099751	2119100
chr10	1004001	1005500	NM_002627	PFKP	chr10	3099751	2095000
chr10	1009701	1011000	NM_002627	PFKP	chr10	3099751	2089400
chr10	1078801	1080350	NM_002627	PFKP	chr10	3099751	2020175
chr10	1091951	1093500	NM_002627	PFKP	chr10	3099751	2007025
chr10	1092701	1094150	NM_002627	PFKP	chr10	3099751	2006325
chr10	1124751	1126300	NM_002627	PFKP	chr10	3099751	1974225
chr10	1145401	1146950	NM_002627	PFKP	chr10	3099751	1953575
chr10	1347651	1349200	NM_002627	PFKP	chr10	3099751	1751325
chr10	1348401	1349900	NM_002627	PFKP	chr10	3099751	1750600
chr10	1379851	1381100	NM_002627	PFKP	chr10	3099751	1719275
chr10	1443851	1445150	NM_002627	PFKP	chr10	3099751	1655250
chr10	1499301	1500600	NM_002627	PFKP	chr10	3099751	1599800
chr10	1540501	1541900	NM_002627	PFKP	chr10	3099751	1558550
chr10	1558151	1559550	NM_002627	PFKP	chr10	3099751	1540900
chr10	1691651	1693000	NM_002627	PFKP	chr10	3099751	1407425
chr10	1704301	1705700	NM_002627	PFKP	chr10	3099751	1394750
chr10	1738401	1739650	NM_002627	PFKP	chr10	3099751	1360725
chr10	1879301	1880800	NM_002627	PFKP	chr10	3099751	1219700
chr10	1890551	1891950	NM_002627	PFKP	chr10	3099751	1208500
chr10	1960001	1961550	NM_002627	PFKP	chr10	3099751	1138975
chr10	1974151	1975600	NM_002627	PFKP	chr10	3099751	1124875
chr10	2000251	2001800	NM_002627	PFKP	chr10	3099751	1098725
chr10	2256951	2258750	NM_002627	PFKP	chr10	3099751	841900
chr10	2532801	2534800	NM_002627	PFKP	chr10	3099751	565950
chr10	2558751	2560200	NM_002627	PFKP	chr10	3099751	540275
chr10	2701251	2702750	NM_002627	PFKP	chr10	3099751	397750
chr10	2742951	2744200	NM_002627	PFKP	chr10	3099751	356175
chr10	2762301	2763650	NM_002627	PFKP	chr10	3099751	336775
chr10	2888551	2889950	NM_002627	PFKP	chr10	3099751	210500
chr10	2957351	2958950	NM_002627	PFKP	chr10	3099751	141600
chr10	3040501	3042000	NM_002627	PFKP	chr10	3099751	58500
chr10	3099651	3101650	NM_032807	FBXO18	chr10	5976354	2875703
chr10	3224901	3226350	NM_002627	PFKP	chr10	3099751	125875
chr10	3267651	3269050	NM_002627	PFKP	chr10	3099751	168600
chr10	3271451	3272750	NM_002627	PFKP	chr10	3099751	172350
chr10	3272301	3273550	NM_002627	PFKP	chr10	3099751	173175
chr10	3371301	3372800	NM_002627	PFKP	chr10	3099751	272300
chr10	3455951	3457650	NM_002627	PFKP	chr10	3099751	357050
chr10	3462151	3463600	NM_002627	PFKP	chr10	3099751	363125
chr10	3486951	3488600	NM_002627	PFKP	chr10	3099751	388025
chr10	3497001	3498500	NM_002627	PFKP	chr10	3099751	398000
chr10	3585901	3587150	NM_002627	PFKP	chr10	3099751	486775
chr10	3781801	3783150	NM_002627	PFKP	chr10	3099751	682725
chr10	3792351	3793750	NM_002627	PFKP	chr10	3099751	693300
chr10	3815151	3816500	NM_002627	PFKP	chr10	3099751	716075
chr10	3837551	3838800	NM_002627	PFKP	chr10	3099751	738425
chr10	3839601	3840850	NM_002627	PFKP	chr10	3099751	740475
chr10	3867501	3868850	NM_002627	PFKP	chr10	3099751	768425
chr10	3961301	3962700	NM_002627	PFKP	chr10	3099751	862250
chr10	4723801	4725150	NM_032807	FBXO18	chr10	5976354	1251878
chr10	5072801	5074300	NM_032807	FBXO18	chr10	5976354	902803
chr10	5325001	5326800	NM_032807	FBXO18	chr10	5976354	650453
chr10	5585751	5587050	NM_032807	FBXO18	chr10	5976354	389953
chr10	5595051	5596300	NM_032807	FBXO18	chr10	5976354	380678
chr10	5618601	5620100	NM_032807	FBXO18	chr10	5976354	357003
chr10	5677501	5679000	NM_032807	FBXO18	chr10	5976354	298103
chr10	6135301	6136750	NM_032807	FBXO18	chr10	5976354	159672
chr10	6167601	6169150	NM_032807	FBXO18	chr10	5976354	192022
chr10	6170101	6171500	NM_032807	FBXO18	chr10	5976354	194447
chr10	6206251	6207600	NM_032807	FBXO18	chr10	5976354	230572
chr10	6210151	6211700	NM_032807	FBXO18	chr10	5976354	234572
chr10	6245301	6246650	NM_032807	FBXO18	chr10	5976354	269622
chr10	6252001	6253500	NM_032807	FBXO18	chr10	5976354	276397
chr10	6254701	6256050	NM_032807	FBXO18	chr10	5976354	279022
chr10	6258301	6259650	NM_032807	FBXO18	chr10	5976354	282622
chr10	6300551	6302100	NM_032807	FBXO18	chr10	5976354	324972
chr10	6356651	6358200	NM_032807	FBXO18	chr10	5976354	381072
chr10	6360801	6362400	NM_032807	FBXO18	chr10	5976354	385247
chr10	6388851	6390150	NM_032807	FBXO18	chr10	5976354	413147
chr10	6394701	6395950	NM_032807	FBXO18	chr10	5976354	418972
chr10	6619201	6620700	NM_032807	FBXO18	chr10	5976354	643597
chr10	7869201	7870600	NM_032807	FBXO18	chr10	5976354	1893547
chr10	7899651	7900950	NM_032807	FBXO18	chr10	5976354	1923947
chr10	7994701	7996000	NM_032807	FBXO18	chr10	5976354	2018997
chr10	8051101	8052600	NM_032807	FBXO18	chr10	5976354	2075497
chr10	8271001	8272300	NM_032807	FBXO18	chr10	5976354	2295297
chr10	8533851	8535250	NM_032807	FBXO18	chr10	5976354	2558197
chr10	8594601	8596050	NM_032807	FBXO18	chr10	5976354	2618972
chr10	11441851	11443250	NM_153498	CAMK1D	chr10	12431588	989037
chr10	11484601	11486000	NM_153498	CAMK1D	chr10	12431588	946287
chr10	11839501	11840750	NM_153498	CAMK1D	chr10	12431588	591462
chr10	11880351	11881950	NM_153498	CAMK1D	chr10	12431588	550437
chr10	11881201	11882650	NM_153498	CAMK1D	chr10	12431588	549662
chr10	11895451	11897050	NM_153498	CAMK1D	chr10	12431588	535337
chr10	11983151	11984400	NM_153498	CAMK1D	chr10	12431588	447812
chr10	12124351	12126100	NM_153498	CAMK1D	chr10	12431588	306362
chr10	12267801	12269250	NM_153498	CAMK1D	chr10	12431588	163062
chr10	12276951	12279200	NM_153498	CAMK1D	chr10	12431588	153512
chr10	12432101	12433350	NM_153498	CAMK1D	chr10	12431588	1138
chr10	12565451	12567100	NM_153498	CAMK1D	chr10	12431588	134688
chr10	12623151	12624600	NM_153498	CAMK1D	chr10	12431588	192288
chr10	12628601	12630050	NM_153498	CAMK1D	chr10	12431588	197738
chr10	12916951	12918650	NM_153498	CAMK1D	chr10	12431588	486213
chr10	13001101	13002450	NM_153498	CAMK1D	chr10	12431588	570188
chr10	13002501	13004150	NM_153498	CAMK1D	chr10	12431588	571738
chr10	13003851	13005500	NM_153498	CAMK1D	chr10	12431588	573088
chr10	13097951	13099300	NM_153498	CAMK1D	chr10	12431588	667038
chr10	13181001	13182400	NM_153498	CAMK1D	chr10	12431588	750113
chr10	13242751	13244000	NM_153498	CAMK1D	chr10	12431588	811788
chr10	13383401	13384950	NM_153498	CAMK1D	chr10	12431588	952588
chr10	13472601	13474150	NM_153498	CAMK1D	chr10	12431588	1041788
chr10	13668151	13669700	NM_153498	CAMK1D	chr10	12431588	1237338
chr10	13765751	13767450	NM_153498	CAMK1D	chr10	12431588	1335013
chr10	13788951	13790350	NM_153498	CAMK1D	chr10	12431588	1358063
chr10	13794251	13795800	NM_153498	CAMK1D	chr10	12431588	1363438
chr10	13824601	13825950	NM_153498	CAMK1D	chr10	12431588	1393688
chr10	13868501	13869900	NM_153498	CAMK1D	chr10	12431588	1437613
chr10	13928851	13930100	NM_153498	CAMK1D	chr10	12431588	1497888
chr10	14009951	14011500	NM_153498	CAMK1D	chr10	12431588	1579138
chr10	14027201	14028600	NM_153498	CAMK1D	chr10	12431588	1596313
chr10	14071701	14073250	NM_153498	CAMK1D	chr10	12431588	1640888
chr10	14091451	14092750	NM_153498	CAMK1D	chr10	12431588	1660513
chr10	14255051	14256400	NM_153498	CAMK1D	chr10	12431588	1824138
chr10	14409201	14410600	NM_153498	CAMK1D	chr10	12431588	1978313
chr10	14530101	14531550	NM_153498	CAMK1D	chr10	12431588	2099238
chr10	14698301	14699900	NM_153498	CAMK1D	chr10	12431588	2267513
chr10	14830851	14832100	NM_001081	CUBN	chr10	17211822	2380346
chr10	14863301	14864750	NM_001081	CUBN	chr10	17211822	2347796
chr10	14864201	14865550	NM_001081	CUBN	chr10	17211822	2346946
chr10	15035451	15037200	NM_001081	CUBN	chr10	17211822	2175496
chr10	15041101	15042800	NM_001081	CUBN	chr10	17211822	2169871
chr10	15217851	15219150	NM_001081	CUBN	chr10	17211822	1993321
chr10	15366501	15367950	NM_001081	CUBN	chr10	17211822	1844596
chr10	15395401	15396750	NM_001081	CUBN	chr10	17211822	1815746
chr10	15467451	15468900	NM_001081	CUBN	chr10	17211822	1743646
chr10	15520801	15522500	NM_001081	CUBN	chr10	17211822	1690171
chr10	15666851	15668250	NM_001081	CUBN	chr10	17211822	1544271
chr10	15873551	15874900	NM_001081	CUBN	chr10	17211822	1337596
chr10	15941601	15943400	NM_001081	CUBN	chr10	17211822	1269321
chr10	16091301	16092800	NM_001081	CUBN	chr10	17211822	1119771
chr10	16412701	16413950	NM_001081	CUBN	chr10	17211822	798496
chr10	16518351	16520250	NM_001081	CUBN	chr10	17211822	692521
chr10	16899101	16900550	NM_001081	CUBN	chr10	17211822	311996
chr10	16914201	16915650	NM_001081	CUBN	chr10	17211822	296896
chr10	17001201	17002450	NM_001081	CUBN	chr10	17211822	209996
chr10	17050001	17051400	NM_001081	CUBN	chr10	17211822	161121
chr10	17107151	17108600	NM_001081	CUBN	chr10	17211822	103946
chr10	17111051	17112350	NM_001081	CUBN	chr10	17211822	100121
chr10	17282501	17283850	NM_001081	CUBN	chr10	17211822	71354
chr10	17283301	17284550	NM_001081	CUBN	chr10	17211822	72104
chr10	17309601	17310850	NM_001081	CUBN	chr10	17211822	98404
chr10	17311601	17312950	NM_001081	CUBN	chr10	17211822	100454
chr10	17725201	17726600	NM_001081	CUBN	chr10	17211822	514079
chr10	18465351	18466750	NM_178815	ARL5B	chr10	18988318	522267
chr10	18516451	18517900	NM_178815	ARL5B	chr10	18988318	471142
chr10	18979801	18981450	NM_178815	ARL5B	chr10	18988318	7692
chr10	18987401	18988900	NM_001081	CUBN	chr10	17211822	1776329
chr10	19308551	19309950	NM_178815	ARL5B	chr10	18988318	320933
chr10	19817501	19818750	NM_178815	ARL5B	chr10	18988318	829808
chr10	20111001	20112350	NM_178815	ARL5B	chr10	18988318	1123358
chr10	20144601	20146050	NM_178815	ARL5B	chr10	18988318	1157008
chr10	20242351	20243750	NM_178815	ARL5B	chr10	18988318	1254733
chr10	20260151	20261600	NM_178815	ARL5B	chr10	18988318	1272558
chr10	20556851	20558300	NM_178815	ARL5B	chr10	18988318	1569258
chr10	20738001	20739350	NM_178815	ARL5B	chr10	18988318	1750358
chr10	21621301	21622700	NM_178815	ARL5B	chr10	18988318	2633683
chr10	21701501	21702850	NM_178815	ARL5B	chr10	18988318	2713858
chr10	21751851	21753100	NM_178815	ARL5B	chr10	18988318	2764158
chr10	21772751	21774200	NM_178815	ARL5B	chr10	18988318	2785158
chr10	21824351	21825650	NM_178815	ARL5B	chr10	18988318	2836683
chr10	21853951	21855400	NM_178815	ARL5B	chr10	18988318	2866358
chr10	21854651	21856000	NM_178815	ARL5B	chr10	18988318	2867008
chr10	21855101	21856750	NM_178815	ARL5B	chr10	18988318	2867608
chr10	21861801	21863350	NM_178815	ARL5B	chr10	18988318	2874258
chr10	22060601	22062050	NM_178815	ARL5B	chr10	18988318	3073008
chr10	22239351	22240700	NM_178815	ARL5B	chr10	18988318	3251708
chr10	22332101	22333550	NM_178815	ARL5B	chr10	18988318	3344508
chr10	22343301	22344550	NM_178815	ARL5B	chr10	18988318	3355608
chr10	22351151	22352400	NM_178815	ARL5B	chr10	18988318	3363458
chr10	22557751	22559200	NM_178815	ARL5B	chr10	18988318	3570158
chr10	22580351	22581850	NM_178815	ARL5B	chr10	18988318	3592783
chr10	22591501	22592750	NM_178815	ARL5B	chr10	18988318	3603808
chr10	22644951	22646350	NM_178815	ARL5B	chr10	18988318	3657333
chr10	22654151	22655700	NM_178815	ARL5B	chr10	18988318	3666608
chr10	22668751	22670000	NM_178815	ARL5B	chr10	18988318	3681058
chr10	22765201	22766750	NM_178815	ARL5B	chr10	18988318	3777658
chr10	22834451	22835900	NM_178815	ARL5B	chr10	18988318	3846858
chr10	22928201	22929650	NM_178815	ARL5B	chr10	18988318	3940608
chr10	22945901	22947300	NM_178815	ARL5B	chr10	18988318	3958283
chr10	22977801	22979200	NM_178815	ARL5B	chr10	18988318	3990183
chr10	22981551	22982950	NM_178815	ARL5B	chr10	18988318	3993933
chr10	23423401	23424950	NM_178815	ARL5B	chr10	18988318	4435858
chr10	23424601	23425850	NM_178815	ARL5B	chr10	18988318	4436908
chr10	23441551	23442800	NM_178815	ARL5B	chr10	18988318	4453858
chr10	23777551	23779000	NM_178815	ARL5B	chr10	18988318	4789958
chr10	23868851	23870250	NM_178815	ARL5B	chr10	18988318	4881233
chr10	24329101	24330400	NM_178815	ARL5B	chr10	18988318	5341433
chr10	24362951	24364450	NM_178815	ARL5B	chr10	18988318	5375383
chr10	24537001	24538350	NM_178815	ARL5B	chr10	18988318	5549358
chr10	24538401	24539700	NM_178815	ARL5B	chr10	18988318	5550733
chr10	24718701	24720200	NM_178815	ARL5B	chr10	18988318	5731133
chr10	25052651	25054150	NM_178815	ARL5B	chr10	18988318	6065083
chr10	25390951	25392250	NM_178815	ARL5B	chr10	18988318	6403283
chr10	26072901	26074300	NM_178815	ARL5B	chr10	18988318	7085283
chr10	26528401	26529800	NM_178815	ARL5B	chr10	18988318	7540783
chr10	26565451	26566700	NM_178815	ARL5B	chr10	18988318	7577758
chr10	26671551	26672900	NM_178815	ARL5B	chr10	18988318	7683908
chr10	27004151	27005650	NM_178815	ARL5B	chr10	18988318	8016583
chr10	27025451	27027100	NM_178815	ARL5B	chr10	18988318	8037958
chr10	27351701	27353000	NM_178815	ARL5B	chr10	18988318	8364033
chr10	27482501	27484200	NM_031866	FZD8	chr10	35970368	8487017
chr10	27570201	27572000	NM_031866	FZD8	chr10	35970368	8399267
chr10	27571201	27572800	NM_031866	FZD8	chr10	35970368	8398367
chr10	27832401	27833750	NM_031866	FZD8	chr10	35970368	8137292
chr10	27953401	27954650	NM_031866	FZD8	chr10	35970368	8016342
chr10	28155001	28156300	NM_031866	FZD8	chr10	35970368	7814717
chr10	28573001	28574450	NM_031866	FZD8	chr10	35970368	7396642
chr10	28576601	28578150	NM_031866	FZD8	chr10	35970368	7392992
chr10	28661801	28663100	NM_031866	FZD8	chr10	35970368	7307917
chr10	28662201	28663450	NM_031866	FZD8	chr10	35970368	7307542
chr10	28665801	28667100	NM_031866	FZD8	chr10	35970368	7303917
chr10	28823451	28825200	NM_031866	FZD8	chr10	35970368	7146042
chr10	28860551	28861850	NM_031866	FZD8	chr10	35970368	7109167
chr10	28861001	28862600	NM_031866	FZD8	chr10	35970368	7108567
chr10	29136301	29137900	NM_031866	FZD8	chr10	35970368	6833267
chr10	29140951	29142550	NM_031866	FZD8	chr10	35970368	6828617
chr10	29267901	29269500	NM_031866	FZD8	chr10	35970368	6701667
chr10	29312751	29314300	NM_031866	FZD8	chr10	35970368	6656842
chr10	29356851	29358150	NM_031866	FZD8	chr10	35970368	6612867
chr10	29359301	29360600	NM_031866	FZD8	chr10	35970368	6610417
chr10	29430751	29432200	NM_031866	FZD8	chr10	35970368	6538892
chr10	29530551	29532500	NM_031866	FZD8	chr10	35970368	6438842
chr10	29582851	29584450	NM_031866	FZD8	chr10	35970368	6386717
chr10	29591801	29593050	NM_031866	FZD8	chr10	35970368	6377942
chr10	29672501	29673900	NM_031866	FZD8	chr10	35970368	6297167
chr10	29674651	29676050	NM_031866	FZD8	chr10	35970368	6295017
chr10	29737701	29739000	NM_031866	FZD8	chr10	35970368	6232017
chr10	29987701	29989050	NM_031866	FZD8	chr10	35970368	5981992
chr10	30085901	30087150	NM_031866	FZD8	chr10	35970368	5883842
chr10	30127651	30129000	NM_031866	FZD8	chr10	35970368	5842042
chr10	30132601	30134000	NM_031866	FZD8	chr10	35970368	5837067
chr10	30155151	30156500	NM_031866	FZD8	chr10	35970368	5814542
chr10	30335901	30337300	NM_031866	FZD8	chr10	35970368	5633767
chr10	30370201	30371550	NM_031866	FZD8	chr10	35970368	5599492
chr10	30371801	30373200	NM_031866	FZD8	chr10	35970368	5597867
chr10	30401901	30403350	NM_031866	FZD8	chr10	35970368	5567742
chr10	30544051	30545600	NM_031866	FZD8	chr10	35970368	5425542
chr10	30826201	30827550	NM_031866	FZD8	chr10	35970368	5143492
chr10	30882301	30883750	NM_031866	FZD8	chr10	35970368	5087342
chr10	31063351	31064700	NM_031866	FZD8	chr10	35970368	4906342
chr10	31113101	31114450	NM_031866	FZD8	chr10	35970368	4856592
chr10	31394951	31396550	NM_031866	FZD8	chr10	35970368	4574617
chr10	31398451	31399950	NM_031866	FZD8	chr10	35970368	4571167
chr10	31399301	31400600	NM_031866	FZD8	chr10	35970368	4570417
chr10	31571401	31572800	NM_031866	FZD8	chr10	35970368	4398267
chr10	31646751	31648050	NM_031866	FZD8	chr10	35970368	4322967
chr10	31977351	31978650	NM_031866	FZD8	chr10	35970368	3992367
chr10	32025651	32027150	NM_031866	FZD8	chr10	35970368	3943967
chr10	32028801	32030050	NM_031866	FZD8	chr10	35970368	3940942
chr10	32029301	32030600	NM_031866	FZD8	chr10	35970368	3940417
chr10	32036101	32037650	NM_031866	FZD8	chr10	35970368	3933492
chr10	32079901	32081150	NM_031866	FZD8	chr10	35970368	3889842
chr10	32088751	32090100	NM_031866	FZD8	chr10	35970368	3880942
chr10	32383801	32385050	NM_031866	FZD8	chr10	35970368	3585942
chr10	32467651	32469150	NM_031866	FZD8	chr10	35970368	3501967
chr10	32729251	32730750	NM_031866	FZD8	chr10	35970368	3240367
chr10	32774201	32776200	NM_031866	FZD8	chr10	35970368	3195167
chr10	33286651	33288150	NM_031866	FZD8	chr10	35970368	2682967
chr10	33308801	33310600	NM_031866	FZD8	chr10	35970368	2660667
chr10	33310001	33311550	NM_031866	FZD8	chr10	35970368	2659592
chr10	33663051	33664750	NM_031866	FZD8	chr10	35970368	2306467
chr10	33747801	33749150	NM_031866	FZD8	chr10	35970368	2221892
chr10	33990051	33991800	NM_031866	FZD8	chr10	35970368	1979442
chr10	34259401	34260700	NM_031866	FZD8	chr10	35970368	1710317
chr10	34353351	34354900	NM_031866	FZD8	chr10	35970368	1616242
chr10	34430551	34432100	NM_031866	FZD8	chr10	35970368	1539042
chr10	34441801	34443150	NM_031866	FZD8	chr10	35970368	1527892
chr10	34510601	34511850	NM_031866	FZD8	chr10	35970368	1459142
chr10	34569001	34570400	NM_031866	FZD8	chr10	35970368	1400667
chr10	34965001	34966500	NM_031866	FZD8	chr10	35970368	1004617
chr10	34966851	34968250	NM_031866	FZD8	chr10	35970368	1002817
chr10	35109151	35110800	NM_031866	FZD8	chr10	35970368	860392
chr10	35219351	35220850	NM_031866	FZD8	chr10	35970368	750267
chr10	35250601	35251900	NM_031866	FZD8	chr10	35970368	719117
chr10	35418801	35420350	NM_031866	FZD8	chr10	35970368	550792
chr10	35519901	35521300	NM_031866	FZD8	chr10	35970368	449767
chr10	35597501	35599000	NM_031866	FZD8	chr10	35970368	372117
chr10	35707551	35709100	NM_031866	FZD8	chr10	35970368	262042
chr10	35715201	35716600	NM_031866	FZD8	chr10	35970368	254467
chr10	35792101	35793700	NM_031866	FZD8	chr10	35970368	177467
chr10	35846051	35847350	NM_031866	FZD8	chr10	35970368	123667
chr10	35970501	35971750	NM_031866	FZD8	chr10	35970368	758
chr10	35972851	35974100	NM_031866	FZD8	chr10	35970368	3108
chr10	35980501	35981900	NM_031866	FZD8	chr10	35970368	10833
chr10	36200601	36201850	NM_031866	FZD8	chr10	35970368	230858
chr10	36218451	36219950	NM_031866	FZD8	chr10	35970368	248833
chr10	36227451	36228950	NM_031866	FZD8	chr10	35970368	257833
chr10	36322601	36324050	NM_031866	FZD8	chr10	35970368	352958
chr10	36470251	36471600	NM_031866	FZD8	chr10	35970368	500558
chr10	36500951	36502400	NM_031866	FZD8	chr10	35970368	531308
chr10	36695701	36697250	NM_031866	FZD8	chr10	35970368	726108
chr10	36867351	36868850	NM_031866	FZD8	chr10	35970368	897733
chr10	36908751	36910200	NM_031866	FZD8	chr10	35970368	939108
chr10	36964751	36966300	NM_031866	FZD8	chr10	35970368	995158
chr10	37130751	37132000	NM_031866	FZD8	chr10	35970368	1161008
chr10	37432701	37434300	NM_031866	FZD8	chr10	35970368	1463133
chr10	38338651	38340100	NM_031866	FZD8	chr10	35970368	2369008
chr10	42290451	42291900	NM_032023	RASSF4	chr10	44775224	2484048
chr10	42597251	42598950	NM_032023	RASSF4	chr10	44775224	2177123
chr10	42598101	42599550	NM_032023	RASSF4	chr10	44775224	2176398
chr10	42645201	42646450	NM_032023	RASSF4	chr10	44775224	2129398
chr10	42690401	42692250	NM_032023	RASSF4	chr10	44775224	2083898
chr10	42859551	42861000	NM_032023	RASSF4	chr10	44775224	1914948
chr10	42897651	42899150	NM_032023	RASSF4	chr10	44775224	1876823
chr10	42898701	42899950	NM_032023	RASSF4	chr10	44775224	1875898
chr10	42909001	42910450	NM_032023	RASSF4	chr10	44775224	1865498
chr10	43065901	43067250	NM_032023	RASSF4	chr10	44775224	1708648
chr10	43212151	43213650	NM_032023	RASSF4	chr10	44775224	1562323
chr10	43223851	43225200	NM_032023	RASSF4	chr10	44775224	1550698
chr10	43270251	43271500	NM_032023	RASSF4	chr10	44775224	1504348
chr10	43389351	43390850	NM_032023	RASSF4	chr10	44775224	1385123
chr10	43464001	43465400	NM_032023	RASSF4	chr10	44775224	1310523
chr10	43661201	43662750	NM_032023	RASSF4	chr10	44775224	1113248
chr10	43725151	43726700	NM_032023	RASSF4	chr10	44775224	1049298
chr10	43759451	43760900	NM_032023	RASSF4	chr10	44775224	1015048
chr10	43780001	43781350	NM_032023	RASSF4	chr10	44775224	994548
chr10	43783801	43785250	NM_032023	RASSF4	chr10	44775224	990698
chr10	44463151	44464600	NM_032023	RASSF4	chr10	44775224	311348
chr10	44464901	44466350	NM_032023	RASSF4	chr10	44775224	309598
chr10	44672601	44673950	NM_032023	RASSF4	chr10	44775224	101948
chr10	44717801	44719300	NM_032023	RASSF4	chr10	44775224	56673
chr10	44728201	44729600	NM_032023	RASSF4	chr10	44775224	46323
chr10	44728701	44730100	NM_032023	RASSF4	chr10	44775224	45823
chr10	44793751	44795000	NM_032023	RASSF4	chr10	44775224	19152
chr10	44816401	44817800	NM_032023	RASSF4	chr10	44775224	41877
chr10	44873551	44874800	NM_032023	RASSF4	chr10	44775224	98952
chr10	44906901	44908250	NM_032023	RASSF4	chr10	44775224	132352
chr10	44911051	44912500	NM_032023	RASSF4	chr10	44775224	136552
chr10	45235301	45236900	NM_032023	RASSF4	chr10	44775224	460877
chr10	46371151	46372550	NM_032023	RASSF4	chr10	44775224	1596627
chr10	46394051	46395500	NM_032023	RASSF4	chr10	44775224	1619552
chr10	46549551	46550800	NM_032023	RASSF4	chr10	44775224	1774952
chr10	48061951	48063400	NM_032023	RASSF4	chr10	44775224	3287452
chr10	48069801	48071100	NM_032023	RASSF4	chr10	44775224	3295227
chr10	48182801	48184150	NM_032023	RASSF4	chr10	44775224	3408252
chr10	48183801	48185100	NM_032023	RASSF4	chr10	44775224	3409227
chr10	48192551	48194050	NM_032023	RASSF4	chr10	44775224	3418077
chr10	49109901	49111200	NM_032023	RASSF4	chr10	44775224	4335327
chr10	49269201	49270450	NM_032023	RASSF4	chr10	44775224	4494602
chr10	49387001	49388600	NM_032023	RASSF4	chr10	44775224	4612577
chr10	49677801	49679300	NM_032023	RASSF4	chr10	44775224	4903327
chr10	49777851	49779250	NM_032023	RASSF4	chr10	44775224	5003327
chr10	49845851	49847100	NM_032023	RASSF4	chr10	44775224	5071252
chr10	49916751	49918150	NM_032023	RASSF4	chr10	44775224	5142227
chr10	50065751	50067250	NM_032023	RASSF4	chr10	44775224	5291277
chr10	50132101	50133550	NM_032023	RASSF4	chr10	44775224	5357602
chr10	50205901	50207250	NM_032023	RASSF4	chr10	44775224	5431352
chr10	50417001	50418400	NM_032023	RASSF4	chr10	44775224	5642477
chr10	50473201	50474700	NM_032023	RASSF4	chr10	44775224	5698727
chr10	50484301	50485800	NM_032023	RASSF4	chr10	44775224	5709827
chr10	50525101	50526550	NM_032023	RASSF4	chr10	44775224	5750602
chr10	50719401	50720800	NM_032023	RASSF4	chr10	44775224	5944877
chr10	51167951	51169400	NM_032023	RASSF4	chr10	44775224	6393452
chr10	51234901	51236350	NM_032023	RASSF4	chr10	44775224	6460402
chr10	51733901	51735250	NM_032023	RASSF4	chr10	44775224	6959352
chr10	52053601	52054850	NM_032023	RASSF4	chr10	44775224	7279002
chr10	52168901	52170750	NM_032023	RASSF4	chr10	44775224	7394602
chr10	52745951	52747200	NM_032023	RASSF4	chr10	44775224	7971352
chr10	53128501	53130300	NM_032023	RASSF4	chr10	44775224	8354177
chr10	53161301	53162550	NM_032023	RASSF4	chr10	44775224	8386702
chr10	53737551	53738800	NM_032023	RASSF4	chr10	44775224	8962952
chr10	53895801	53897050	NM_032023	RASSF4	chr10	44775224	9121202
chr10	54500351	54501800	NM_032023	RASSF4	chr10	44775224	9725852
chr10	54556051	54557300	NM_032804	ADO	chr10	64234521	9677845
chr10	55365201	55366500	NM_032804	ADO	chr10	64234521	8868670
chr10	58580401	58581650	NM_032804	ADO	chr10	64234521	5653495
chr10	59053651	59055000	NM_032804	ADO	chr10	64234521	5180195
chr10	59494801	59496050	NM_032804	ADO	chr10	64234521	4739095
chr10	59696301	59697600	NM_032804	ADO	chr10	64234521	4537570
chr10	59814601	59815900	NM_032804	ADO	chr10	64234521	4419270
chr10	60606401	60607750	NM_032804	ADO	chr10	64234521	3627445
chr10	60861401	60862850	NM_032804	ADO	chr10	64234521	3372395
chr10	61336201	61337500	NM_032804	ADO	chr10	64234521	2897670
chr10	61604751	61606000	NM_032804	ADO	chr10	64234521	2629145
chr10	61779851	61781200	NM_032804	ADO	chr10	64234521	2453995
chr10	61795701	61797100	NM_032804	ADO	chr10	64234521	2438120
chr10	61814001	61815500	NM_032804	ADO	chr10	64234521	2419770
chr10	61876101	61877500	NM_032804	ADO	chr10	64234521	2357720
chr10	62196901	62198400	NM_032804	ADO	chr10	64234521	2036870
chr10	62207351	62208600	NM_032804	ADO	chr10	64234521	2026545
chr10	62272001	62273500	NM_032804	ADO	chr10	64234521	1961770
chr10	62781301	62782600	NM_032804	ADO	chr10	64234521	1452570
chr10	62826901	62828150	NM_032804	ADO	chr10	64234521	1406995
chr10	62901601	62902950	NM_032804	ADO	chr10	64234521	1332245
chr10	62907001	62908600	NM_032804	ADO	chr10	64234521	1326720
chr10	62928051	62929300	NM_032804	ADO	chr10	64234521	1305845
chr10	63091801	63093200	NM_032804	ADO	chr10	64234521	1142020
chr10	63259451	63260850	NM_032804	ADO	chr10	64234521	974370
chr10	63329451	63330900	NM_032804	ADO	chr10	64234521	904345
chr10	63333101	63334600	NM_032804	ADO	chr10	64234521	900670
chr10	63584601	63586000	NM_032804	ADO	chr10	64234521	649220
chr10	63624601	63626150	NM_032804	ADO	chr10	64234521	609145
chr10	63873151	63874700	NM_032804	ADO	chr10	64234521	360595
chr10	63984851	63986150	NM_032804	ADO	chr10	64234521	249020
chr10	64011951	64013450	NM_032804	ADO	chr10	64234521	221820
chr10	64119051	64120400	NM_032804	ADO	chr10	64234521	114795
chr10	64189701	64191150	NM_032804	ADO	chr10	64234521	44095
chr10	64233601	64235050	NM_000399	EGR2	chr10	64246132	11806
chr10	64387951	64389200	NM_000399	EGR2	chr10	64246132	142444
chr10	64406951	64408250	NM_000399	EGR2	chr10	64246132	161469
chr10	64690051	64691400	NM_000399	EGR2	chr10	64246132	444594
chr10	64702851	64704150	NM_000399	EGR2	chr10	64246132	457369
chr10	64950151	64951400	NM_000399	EGR2	chr10	64246132	704644
chr10	65057001	65058500	NM_000399	EGR2	chr10	64246132	811619
chr10	65057951	65059300	NM_000399	EGR2	chr10	64246132	812494
chr10	65058551	65060100	NM_000399	EGR2	chr10	64246132	813194
chr10	65071201	65072600	NM_000399	EGR2	chr10	64246132	825769
chr10	65099601	65100900	NM_000399	EGR2	chr10	64246132	854119
chr10	65101651	65103100	NM_000399	EGR2	chr10	64246132	856244
chr10	65120151	65121500	NM_000399	EGR2	chr10	64246132	874694
chr10	65141651	65142950	NM_000399	EGR2	chr10	64246132	896169
chr10	65142601	65143850	NM_000399	EGR2	chr10	64246132	897094
chr10	65466201	65467700	NM_000399	EGR2	chr10	64246132	1220819
chr10	66038801	66040200	NM_000399	EGR2	chr10	64246132	1793369
chr10	66719251	66720750	NM_000399	EGR2	chr10	64246132	2473869
chr10	66999551	67001400	NM_000399	EGR2	chr10	64246132	2754344
chr10	67340751	67342150	NM_000399	EGR2	chr10	64246132	3095319
chr10	67436951	67438400	NM_002727	SRGN	chr10	70517833	3080157
chr10	67518551	67519800	NM_002727	SRGN	chr10	70517833	2998657
chr10	67695201	67696550	NM_002727	SRGN	chr10	70517833	2821957
chr10	68418051	68419350	NM_002727	SRGN	chr10	70517833	2099132
chr10	68536951	68538250	NM_002727	SRGN	chr10	70517833	1980232
chr10	69193451	69195000	NM_002727	SRGN	chr10	70517833	1323607
chr10	69278551	69280200	NM_002727	SRGN	chr10	70517833	1238457
chr10	69504301	69505550	NM_002727	SRGN	chr10	70517833	1012907
chr10	69516901	69518350	NM_002727	SRGN	chr10	70517833	1000207
chr10	69761801	69763300	NM_002727	SRGN	chr10	70517833	755282
chr10	69956801	69958100	NM_002727	SRGN	chr10	70517833	560382
chr10	70029351	70030700	NM_002727	SRGN	chr10	70517833	487807
chr10	70330201	70331800	NM_002727	SRGN	chr10	70517833	186832
chr10	70385051	70386650	NM_002727	SRGN	chr10	70517833	131982
chr10	70552801	70554350	NM_002727	SRGN	chr10	70517833	35743
chr10	70654601	70655900	NM_002727	SRGN	chr10	70517833	137418
chr10	70713751	70715000	NM_012339	TSPAN15	chr10	70881231	166855
chr10	70748651	70750000	NM_012339	TSPAN15	chr10	70881231	131905
chr10	70765001	70766250	NM_012339	TSPAN15	chr10	70881231	115605
chr10	70778601	70779950	NM_012339	TSPAN15	chr10	70881231	101955
chr10	70835401	70837150	NM_012339	TSPAN15	chr10	70881231	44955
chr10	70890651	70891900	NM_012339	TSPAN15	chr10	70881231	10045
chr10	70909151	70910750	NM_012339	TSPAN15	chr10	70881231	28720
chr10	70927351	70928650	NM_012339	TSPAN15	chr10	70881231	46770
chr10	71080201	71081800	NM_012339	TSPAN15	chr10	70881231	199770
chr10	71121551	71122900	NM_012339	TSPAN15	chr10	70881231	240995
chr10	71151201	71152650	NM_012339	TSPAN15	chr10	70881231	270695
chr10	71187001	71188700	NM_012339	TSPAN15	chr10	70881231	306620
chr10	71203601	71205100	NM_012339	TSPAN15	chr10	70881231	323120
chr10	71230651	71232100	NM_012339	TSPAN15	chr10	70881231	350145
chr10	71251301	71252800	NM_012339	TSPAN15	chr10	70881231	370820
chr10	71298501	71299900	NM_012339	TSPAN15	chr10	70881231	417970
chr10	71337351	71338650	NM_012339	TSPAN15	chr10	70881231	456770
chr10	71470351	71471750	NM_012339	TSPAN15	chr10	70881231	589820
chr10	71506051	71507500	NM_012339	TSPAN15	chr10	70881231	625545
chr10	71725801	71727200	NM_012339	TSPAN15	chr10	70881231	845270
chr10	71760751	71762300	NM_012339	TSPAN15	chr10	70881231	880295
chr10	71793651	71795150	NM_012339	TSPAN15	chr10	70881231	913170
chr10	71906901	71908200	NM_018344	SLC29A3	chr10	72749015	841464
chr10	71907501	71909000	NM_018344	SLC29A3	chr10	72749015	840764
chr10	71909451	71910900	NM_018344	SLC29A3	chr10	72749015	838839
chr10	71911451	71912850	NM_018344	SLC29A3	chr10	72749015	836864
chr10	71955901	71957300	NM_018344	SLC29A3	chr10	72749015	792414
chr10	72045501	72046800	NM_018344	SLC29A3	chr10	72749015	702864
chr10	72120001	72121250	NM_018344	SLC29A3	chr10	72749015	628389
chr10	72122051	72123500	NM_018344	SLC29A3	chr10	72749015	626239
chr10	72127401	72129050	NM_018344	SLC29A3	chr10	72749015	620789
chr10	72315501	72316950	NM_018344	SLC29A3	chr10	72749015	432789
chr10	72359551	72360800	NM_018344	SLC29A3	chr10	72749015	388839
chr10	72361601	72363150	NM_018344	SLC29A3	chr10	72749015	386639
chr10	72438451	72439700	NM_018344	SLC29A3	chr10	72749015	309939
chr10	72444801	72446300	NM_018344	SLC29A3	chr10	72749015	303464
chr10	72646301	72647800	NM_018344	SLC29A3	chr10	72749015	101964
chr10	72646851	72648100	NM_018344	SLC29A3	chr10	72749015	101539
chr10	72665451	72667000	NM_018344	SLC29A3	chr10	72749015	82789
chr10	72691251	72692700	NM_018344	SLC29A3	chr10	72749015	57039
chr10	72854301	72855950	NM_018344	SLC29A3	chr10	72749015	106111
chr10	72864701	72866250	NM_018344	SLC29A3	chr10	72749015	116461
chr10	72904401	72906050	NM_018344	SLC29A3	chr10	72749015	156211
chr10	72950701	72952000	NM_018344	SLC29A3	chr10	72749015	202336
chr10	72990551	72991800	NM_018344	SLC29A3	chr10	72749015	242161
chr10	72993751	72995050	NM_018344	SLC29A3	chr10	72749015	245386
chr10	73014751	73016250	NM_018344	SLC29A3	chr10	72749015	266486
chr10	73095501	73097050	NM_018344	SLC29A3	chr10	72749015	347261
chr10	73178151	73179400	NM_014767	SPOCK2	chr10	73518796	340020
chr10	73318051	73319300	NM_014767	SPOCK2	chr10	73518796	200120
chr10	73394401	73395950	NM_014767	SPOCK2	chr10	73518796	123620
chr10	73408051	73409400	NM_014767	SPOCK2	chr10	73518796	110070
chr10	73438701	73440100	NM_014767	SPOCK2	chr10	73518796	79395
chr10	73473451	73474800	NM_014767	SPOCK2	chr10	73518796	44670
chr10	73488251	73489800	NM_014767	SPOCK2	chr10	73518796	29770
chr10	73499451	73501050	NM_014767	SPOCK2	chr10	73518796	18545
chr10	73677601	73679300	NM_014767	SPOCK2	chr10	73518796	159655
chr10	73726301	73728150	NM_014767	SPOCK2	chr10	73518796	208430
chr10	73737601	73739100	NM_014767	SPOCK2	chr10	73518796	219555
chr10	73748501	73749900	NM_014767	SPOCK2	chr10	73518796	230405
chr10	73793551	73794950	NM_014767	SPOCK2	chr10	73518796	275455
chr10	74121901	74123350	NM_015190	DNAJC9	chr10	74677031	554405
chr10	74316251	74317900	NM_015190	DNAJC9	chr10	74677031	359955
chr10	74525101	74526600	NM_015190	DNAJC9	chr10	74677031	151180
chr10	74597001	74598500	NM_015190	DNAJC9	chr10	74677031	79280
chr10	74617801	74619250	NM_015190	DNAJC9	chr10	74677031	58505
chr10	74681701	74683150	NM_015190	DNAJC9	chr10	74677031	5395
chr10	74843451	74844750	NM_015190	DNAJC9	chr10	74677031	167070
chr10	75159451	75161000	NM_015190	DNAJC9	chr10	74677031	483195
chr10	75173051	75174900	NM_015190	DNAJC9	chr10	74677031	496945
chr10	75211351	75212800	NM_015190	DNAJC9	chr10	74677031	535045
chr10	75214551	75215950	NM_015190	DNAJC9	chr10	74677031	538220
chr10	75395451	75396700	NM_015190	DNAJC9	chr10	74677031	719045
chr10	75428401	75429650	NM_015190	DNAJC9	chr10	74677031	751995
chr10	76168251	76169700	NM_001003892	DUPD1	chr10	76488278	319302
chr10	76335851	76337350	NM_001003892	DUPD1	chr10	76488278	151677
chr10	76710551	76711900	NM_032772	ZNF503	chr10	76831519	120293
chr10	76723151	76725400	NM_032772	ZNF503	chr10	76831519	107243
chr10	77647301	77648750	NM_032772	ZNF503	chr10	76831519	816507
chr10	77681301	77682650	NM_032772	ZNF503	chr10	76831519	850457
chr10	77738451	77739700	NM_032772	ZNF503	chr10	76831519	907557
chr10	78470801	78472250	NM_032772	ZNF503	chr10	76831519	1640007
chr10	78780051	78781300	NM_032772	ZNF503	chr10	76831519	1949157
chr10	78822151	78823400	NM_032772	ZNF503	chr10	76831519	1991257
chr10	78961001	78962350	NM_032772	ZNF503	chr10	76831519	2130157
chr10	79032251	79033700	NM_032772	ZNF503	chr10	76831519	2201457
chr10	79265551	79267000	NM_032772	ZNF503	chr10	76831519	2434757
chr10	79305851	79307200	NM_032772	ZNF503	chr10	76831519	2475007
chr10	79306951	79308600	NM_032772	ZNF503	chr10	76831519	2476257
chr10	79458601	79460150	NM_032772	ZNF503	chr10	76831519	2627857
chr10	79482401	79483850	NM_032772	ZNF503	chr10	76831519	2651607
chr10	79482951	79484300	NM_032772	ZNF503	chr10	76831519	2652107
chr10	79604951	79606400	NM_032333	C10orf58	chr10	82158221	2552545
chr10	79921201	79922450	NM_032333	C10orf58	chr10	82158221	2236395
chr10	80129601	80131050	NM_032333	C10orf58	chr10	82158221	2027895
chr10	80184151	80185400	NM_032333	C10orf58	chr10	82158221	1973445
chr10	80186051	80187300	NM_032333	C10orf58	chr10	82158221	1971545
chr10	80403251	80404900	NM_032333	C10orf58	chr10	82158221	1754145
chr10	80481501	80482750	NM_032333	C10orf58	chr10	82158221	1676095
chr10	80532351	80533850	NM_032333	C10orf58	chr10	82158221	1625120
chr10	80607801	80609200	NM_032333	C10orf58	chr10	82158221	1549720
chr10	80667051	80668400	NM_032333	C10orf58	chr10	82158221	1490495
chr10	80671101	80673250	NM_032333	C10orf58	chr10	82158221	1486045
chr10	80832851	80834250	NM_032333	C10orf58	chr10	82158221	1324670
chr10	80833451	80835000	NM_032333	C10orf58	chr10	82158221	1323995
chr10	80873601	80874850	NM_032333	C10orf58	chr10	82158221	1283995
chr10	81654001	81655350	NM_032333	C10orf58	chr10	82158221	503545
chr10	81796051	81797400	NM_032333	C10orf58	chr10	82158221	361495
chr10	81907801	81909300	NM_032333	C10orf58	chr10	82158221	249670
chr10	81954801	81956300	NM_032333	C10orf58	chr10	82158221	202670
chr10	82162551	82163850	NM_032333	C10orf58	chr10	82158221	4980
chr10	82258901	82260350	NM_030927	TSPAN14	chr10	82204017	55609
chr10	82276001	82277500	NM_030927	TSPAN14	chr10	82204017	72734
chr10	82278751	82280200	NM_030927	TSPAN14	chr10	82204017	75459
chr10	82291951	82293350	NM_030927	TSPAN14	chr10	82204017	88634
chr10	82411901	82413400	NM_030927	TSPAN14	chr10	82204017	208634
chr10	82413351	82414600	NM_030927	TSPAN14	chr10	82204017	209959
chr10	82518951	82520250	NM_030927	TSPAN14	chr10	82204017	315584
chr10	82821551	82822800	NM_030927	TSPAN14	chr10	82204017	618159
chr10	82822401	82823800	NM_030927	TSPAN14	chr10	82204017	619084
chr10	84359051	84360500	NM_030927	TSPAN14	chr10	82204017	2155759
chr10	85157601	85159000	NM_030927	TSPAN14	chr10	82204017	2954284
chr10	85732801	85734250	NM_024756	MMRN2	chr10	88707405	2973879
chr10	86014001	86015250	NM_024756	MMRN2	chr10	88707405	2692779
chr10	86016801	86018200	NM_024756	MMRN2	chr10	88707405	2689904
chr10	86045701	86047300	NM_024756	MMRN2	chr10	88707405	2660904
chr10	86058051	86059300	NM_024756	MMRN2	chr10	88707405	2648729
chr10	86173851	86175400	NM_024756	MMRN2	chr10	88707405	2532779
chr10	86924851	86926350	NM_024756	MMRN2	chr10	88707405	1781804
chr10	86994051	86995450	NM_024756	MMRN2	chr10	88707405	1712654
chr10	88160551	88162100	NM_024756	MMRN2	chr10	88707405	546079
chr10	88270201	88271450	NM_024756	MMRN2	chr10	88707405	436579
chr10	88460201	88461500	NM_024756	MMRN2	chr10	88707405	246554
chr10	88497051	88498300	NM_024756	MMRN2	chr10	88707405	209729
chr10	88617501	88619150	NM_024756	MMRN2	chr10	88707405	89079
chr10	88622151	88623400	NM_024756	MMRN2	chr10	88707405	84629
chr10	88703501	88705050	NM_024756	MMRN2	chr10	88707405	3129
chr10	88704651	88706200	NM_024756	MMRN2	chr10	88707405	1979
chr10	88807201	88808650	NM_133447	AGAP11	chr10	88720477	87449
chr10	89462451	89463900	NM_004670	PAPSS2	chr10	89409455	53721
chr10	89567151	89568700	NM_004670	PAPSS2	chr10	89409455	158471
chr10	89604051	89605450	NM_004670	PAPSS2	chr10	89409455	195296
chr10	90629151	90630600	NM_001613	ACTA2	chr10	90702560	72684
chr10	90629651	90631350	NM_001613	ACTA2	chr10	90702560	72059
chr10	90630451	90631850	NM_001613	ACTA2	chr10	90702560	71409
chr10	90701001	90702500	NM_001613	ACTA2	chr10	90702560	809
chr10	90735751	90737200	NM_001613	ACTA2	chr10	90702560	33916
chr10	90739551	90741050	NM_001613	ACTA2	chr10	90702560	37741
chr10	90740351	90741900	NM_001613	ACTA2	chr10	90702560	38566
chr10	90836101	90837600	NM_001613	ACTA2	chr10	90702560	134291
chr10	90974301	90975750	NM_001613	ACTA2	chr10	90702560	272466
chr10	91077101	91078800	NM_001613	ACTA2	chr10	90702560	375391
chr10	91097251	91098500	NM_001613	ACTA2	chr10	90702560	395316
chr10	91268601	91270150	NM_001613	ACTA2	chr10	90702560	566816
chr10	91394651	91396000	NM_001613	ACTA2	chr10	90702560	692766
chr10	92680201	92681750	NM_001613	ACTA2	chr10	90702560	1978416
chr10	92781901	92783150	NM_001613	ACTA2	chr10	90702560	2079966
chr10	92783251	92784600	NM_001613	ACTA2	chr10	90702560	2081366
chr10	92783951	92785450	NM_001613	ACTA2	chr10	90702560	2082141
chr10	92827101	92828350	NM_001613	ACTA2	chr10	90702560	2125166
chr10	93087351	93088750	NM_013451	MYOF	chr10	95232064	2144013
chr10	93090051	93091650	NM_013451	MYOF	chr10	95232064	2141213
chr10	93158501	93160100	NM_013451	MYOF	chr10	95232064	2072763
chr10	93357801	93359250	NM_013451	MYOF	chr10	95232064	1873538
chr10	93421601	93423000	NM_013451	MYOF	chr10	95232064	1809763
chr10	93672701	93674150	NM_013451	MYOF	chr10	95232064	1558638
chr10	94040001	94041450	NM_013451	MYOF	chr10	95232064	1191338
chr10	94180201	94181650	NM_013451	MYOF	chr10	95232064	1051138
chr10	94439851	94441450	NM_013451	MYOF	chr10	95232064	791413
chr10	94448751	94450300	NM_013451	MYOF	chr10	95232064	782538
chr10	94580101	94581700	NM_013451	MYOF	chr10	95232064	651163
chr10	94887401	94888850	NM_013451	MYOF	chr10	95232064	343938
chr10	94948351	94949800	NM_013451	MYOF	chr10	95232064	282988
chr10	95080251	95082050	NM_013451	MYOF	chr10	95232064	150913
chr10	95161851	95163450	NM_013451	MYOF	chr10	95232064	69413
chr10	95162501	95164000	NM_013451	MYOF	chr10	95232064	68813
chr10	95212051	95213700	NM_013451	MYOF	chr10	95232064	19188
chr10	95291701	95293050	NM_013451	MYOF	chr10	95232064	60312
chr10	95451751	95453200	NM_013451	MYOF	chr10	95232064	220412
chr10	95538451	95539750	NM_013451	MYOF	chr10	95232064	307037
chr10	95882501	95883900	NM_013451	MYOF	chr10	95232064	651137
chr10	95953901	95955200	NM_013451	MYOF	chr10	95232064	722487
chr10	96111951	96113450	NM_013451	MYOF	chr10	95232064	880637
chr10	97083751	97085100	NM_001776	ENTPD1	chr10	97505662	421236
chr10	97310901	97312150	NM_001776	ENTPD1	chr10	97505662	194136
chr10	97443301	97444750	NM_001776	ENTPD1	chr10	97505662	61636
chr10	97478501	97479950	NM_001776	ENTPD1	chr10	97505662	26436
chr10	97491451	97492900	NM_001776	ENTPD1	chr10	97505662	13486
chr10	97565001	97566550	NM_001776	ENTPD1	chr10	97505662	60114
chr10	97839151	97840750	NM_001776	ENTPD1	chr10	97505662	334289
chr10	97870601	97872000	NM_001776	ENTPD1	chr10	97505662	365639
chr10	97873801	97875200	NM_001776	ENTPD1	chr10	97505662	368839
chr10	97878901	97880900	NM_001776	ENTPD1	chr10	97505662	374239
chr10	98246501	98247950	NM_001776	ENTPD1	chr10	97505662	741564
chr10	98335301	98337000	NM_001776	ENTPD1	chr10	97505662	830489
chr10	98336501	98337850	NM_001776	ENTPD1	chr10	97505662	831514
chr10	98436801	98438350	NM_001776	ENTPD1	chr10	97505662	931914
chr10	98470101	98471450	NM_001776	ENTPD1	chr10	97505662	965114
chr10	98507851	98509100	NM_001776	ENTPD1	chr10	97505662	1002814
chr10	98550601	98552300	NM_001776	ENTPD1	chr10	97505662	1045789
chr10	98628701	98630150	NM_001776	ENTPD1	chr10	97505662	1123764
chr10	98845351	98846650	NM_001776	ENTPD1	chr10	97505662	1340339
chr10	99041301	99042650	NM_001776	ENTPD1	chr10	97505662	1536314
chr10	99082051	99083450	NM_001776	ENTPD1	chr10	97505662	1577089
chr10	99249351	99250750	NM_001776	ENTPD1	chr10	97505662	1744389
chr10	99291451	99292850	NM_001776	ENTPD1	chr10	97505662	1786489
chr10	99292301	99293800	NM_001776	ENTPD1	chr10	97505662	1787389
chr10	99390501	99391750	NM_001776	ENTPD1	chr10	97505662	1885464
chr10	99463851	99465300	NM_001776	ENTPD1	chr10	97505662	1958914
chr10	99618551	99620050	NM_015960	CUTC	chr10	101481947	1862646
chr10	99645101	99646650	NM_015960	CUTC	chr10	101481947	1836071
chr10	99690301	99691600	NM_015960	CUTC	chr10	101481947	1790996
chr10	99883801	99885650	NM_015960	CUTC	chr10	101481947	1597221
chr10	100098701	100100200	NM_015960	CUTC	chr10	101481947	1382496
chr10	100100551	100101950	NM_015960	CUTC	chr10	101481947	1380696
chr10	100102451	100103750	NM_015960	CUTC	chr10	101481947	1378846
chr10	100164401	100165650	NM_015960	CUTC	chr10	101481947	1316921
chr10	100216801	100218100	NM_015960	CUTC	chr10	101481947	1264496
chr10	100983551	100984800	NM_015960	CUTC	chr10	101481947	497771
chr10	101153051	101154350	NM_015960	CUTC	chr10	101481947	328246
chr10	101299901	101301250	NM_015960	CUTC	chr10	101481947	181371
chr10	101359751	101361000	NM_015960	CUTC	chr10	101481947	121571
chr10	101481051	101482350	NM_001001342	BLOC1S2	chr10	102036104	554403
chr10	101676201	101677550	NM_015960	CUTC	chr10	101481947	194929
chr10	101732601	101733900	NM_015960	CUTC	chr10	101481947	251304
chr10	101755751	101757050	NM_015960	CUTC	chr10	101481947	274454
chr10	101793051	101794400	NM_001001342	BLOC1S2	chr10	102036104	242378
chr10	101935351	101936850	NM_001001342	BLOC1S2	chr10	102036104	100003
chr10	101978801	101980250	NM_001001342	BLOC1S2	chr10	102036104	56578
chr10	102123001	102124450	NM_005063	SCD	chr10	102096761	26965
chr10	102284901	102286550	NM_005063	SCD	chr10	102096761	188965
chr10	102404801	102406350	NM_005063	SCD	chr10	102096761	308815
chr10	102430551	102431850	NM_005063	SCD	chr10	102096761	334440
chr10	102436801	102438200	NM_005063	SCD	chr10	102096761	340740
chr10	102481301	102482550	NM_005063	SCD	chr10	102096761	385165
chr10	102483401	102484700	NM_005063	SCD	chr10	102096761	387290
chr10	102486801	102488350	NM_005063	SCD	chr10	102096761	390815
chr10	102491001	102492250	NM_005063	SCD	chr10	102096761	394865
chr10	102563951	102565450	NM_005063	SCD	chr10	102096761	467940
chr10	102565851	102567350	NM_005063	SCD	chr10	102096761	469840
chr10	102575101	102576550	NM_005063	SCD	chr10	102096761	479065
chr10	102662051	102663300	NM_005063	SCD	chr10	102096761	565915
chr10	102810851	102812150	NM_013274	POLL	chr10	103337963	526462
chr10	102812651	102814300	NM_013274	POLL	chr10	103337963	524487
chr10	102817001	102818450	NM_013274	POLL	chr10	103337963	520237
chr10	102836901	102838700	NM_013274	POLL	chr10	103337963	500162
chr10	102884351	102885800	NM_013274	POLL	chr10	103337963	452887
chr10	102963051	102964300	NM_013274	POLL	chr10	103337963	374287
chr10	102965651	102966950	NM_013274	POLL	chr10	103337963	371662
chr10	103102901	103104400	NM_013274	POLL	chr10	103337963	234312
chr10	103235301	103236750	NM_013274	POLL	chr10	103337963	101937
chr10	103239301	103240600	NM_013274	POLL	chr10	103337963	98012
chr10	103307551	103308800	NM_013274	POLL	chr10	103337963	29787
chr10	103443951	103445350	NM_013274	POLL	chr10	103337963	106688
chr10	103567451	103568850	NM_022039	FBXW4	chr10	103444733	123418
chr10	103575601	103577050	NM_022039	FBXW4	chr10	103444733	131593
chr10	103597651	103599100	NM_022039	FBXW4	chr10	103444733	153643
chr10	103870351	103871600	NM_022039	FBXW4	chr10	103444733	426243
chr10	103901301	103902700	NM_022039	FBXW4	chr10	103444733	457268
chr10	103975051	103976400	NM_004311	ARL3	chr10	104464180	488454
chr10	104143101	104144550	NM_004311	ARL3	chr10	104464180	320354
chr10	104328501	104329950	NM_004311	ARL3	chr10	104464180	134954
chr10	104329651	104331100	NM_004311	ARL3	chr10	104464180	133804
chr10	104348951	104350500	NM_004311	ARL3	chr10	104464180	114454
chr10	104361201	104362700	NM_004311	ARL3	chr10	104464180	102229
chr10	104362201	104363450	NM_004311	ARL3	chr10	104464180	101354
chr10	104395451	104397050	NM_004311	ARL3	chr10	104464180	67929
chr10	104488051	104489300	NM_178858	SFXN2	chr10	104464287	24389
chr10	104493001	104494250	NM_178858	SFXN2	chr10	104464287	29339
chr10	104525101	104526550	NM_178858	SFXN2	chr10	104464287	61539
chr10	104552301	104553700	NM_178858	SFXN2	chr10	104464287	88714
chr10	104603251	104604850	NM_178858	SFXN2	chr10	104464287	139764
chr10	104638701	104640100	NM_178858	SFXN2	chr10	104464287	175114
chr10	104941551	104942950	NM_178858	SFXN2	chr10	104464287	477964
chr10	105145601	105147100	NM_178858	SFXN2	chr10	104464287	682064
chr10	105489801	105491350	NM_178858	SFXN2	chr10	104464287	1026289
chr10	105506951	105508250	NM_178858	SFXN2	chr10	104464287	1043314
chr10	105508101	105509650	NM_178858	SFXN2	chr10	104464287	1044589
chr10	105513001	105514400	NM_178858	SFXN2	chr10	104464287	1049414
chr10	105544951	105546400	NM_178858	SFXN2	chr10	104464287	1081389
chr10	105561651	105563200	NM_178858	SFXN2	chr10	104464287	1098139
chr10	105595201	105596700	NM_178858	SFXN2	chr10	104464287	1131664
chr10	105657451	105659000	NM_178858	SFXN2	chr10	104464287	1193939
chr10	105667101	105668550	NM_178858	SFXN2	chr10	104464287	1203539
chr10	105771251	105772700	NM_178858	SFXN2	chr10	104464287	1307689
chr10	105870751	105872100	NM_178858	SFXN2	chr10	104464287	1407139
chr10	105871401	105872650	NM_178858	SFXN2	chr10	104464287	1407739
chr10	106003851	106005300	NM_178858	SFXN2	chr10	104464287	1540289
chr10	106017801	106019400	NM_178858	SFXN2	chr10	104464287	1554314
chr10	106048251	106049500	NM_178858	SFXN2	chr10	104464287	1584589
chr10	106080551	106082200	NM_178858	SFXN2	chr10	104464287	1617089
chr10	106086701	106088300	NM_178858	SFXN2	chr10	104464287	1623214
chr10	106087551	106089250	NM_178858	SFXN2	chr10	104464287	1624114
chr10	106357201	106358750	NM_178858	SFXN2	chr10	104464287	1893689
chr10	108300251	108301650	NM_178858	SFXN2	chr10	104464287	3836664
chr10	108331501	108332850	NM_178858	SFXN2	chr10	104464287	3867889
chr10	108397751	108399100	NM_178858	SFXN2	chr10	104464287	3934139
chr10	108667151	108668450	NM_178858	SFXN2	chr10	104464287	4203514
chr10	108707851	108709100	NM_178858	SFXN2	chr10	104464287	4244189
chr10	108914301	108915650	NM_178858	SFXN2	chr10	104464287	4450689
chr10	109121201	109122600	NM_178858	SFXN2	chr10	104464287	4657614
chr10	109284501	109285800	NM_178858	SFXN2	chr10	104464287	4820864
chr10	110270901	110272450	NM_016234	ACSL5	chr10	114125945	3854269
chr10	110343451	110345050	NM_016234	ACSL5	chr10	114125945	3781694
chr10	110940701	110942150	NM_016234	ACSL5	chr10	114125945	3184519
chr10	111188701	111189950	NM_016234	ACSL5	chr10	114125945	2936619
chr10	111716551	111717800	NM_016234	ACSL5	chr10	114125945	2408769
chr10	111756051	111757300	NM_016234	ACSL5	chr10	114125945	2369269
chr10	111891251	111892750	NM_016234	ACSL5	chr10	114125945	2233944
chr10	111919801	111921300	NM_016234	ACSL5	chr10	114125945	2205394
chr10	111925601	111926900	NM_016234	ACSL5	chr10	114125945	2199694
chr10	112054101	112055800	NM_016234	ACSL5	chr10	114125945	2070994
chr10	112060051	112061300	NM_016234	ACSL5	chr10	114125945	2065269
chr10	112141501	112143650	NM_016234	ACSL5	chr10	114125945	1983369
chr10	112147651	112149150	NM_016234	ACSL5	chr10	114125945	1977544
chr10	112250451	112251750	NM_016234	ACSL5	chr10	114125945	1874844
chr10	112277101	112278350	NM_016234	ACSL5	chr10	114125945	1848219
chr10	112383951	112385400	NM_016234	ACSL5	chr10	114125945	1741269
chr10	112425351	112426700	NM_016234	ACSL5	chr10	114125945	1699919
chr10	112428701	112430150	NM_016234	ACSL5	chr10	114125945	1696519
chr10	112479901	112481350	NM_016234	ACSL5	chr10	114125945	1645319
chr10	112508151	112509500	NM_016234	ACSL5	chr10	114125945	1617119
chr10	112596351	112597600	NM_016234	ACSL5	chr10	114125945	1528969
chr10	112668301	112669750	NM_016234	ACSL5	chr10	114125945	1456919
chr10	113016901	113018300	NM_016234	ACSL5	chr10	114125945	1108344
chr10	113831351	113832900	NM_016234	ACSL5	chr10	114125945	293819
chr10	114111101	114112600	NM_016234	ACSL5	chr10	114125945	14094
chr10	114138501	114139750	NM_016234	ACSL5	chr10	114125945	13181
chr10	114195451	114197700	NM_016234	ACSL5	chr10	114125945	70631
chr10	114657701	114659250	NM_016234	ACSL5	chr10	114125945	532531
chr10	114660801	114662300	NM_016234	ACSL5	chr10	114125945	535606
chr10	114698901	114700300	NM_016234	ACSL5	chr10	114125945	573656
chr10	114701001	114702500	NM_016234	ACSL5	chr10	114125945	575806
chr10	114786351	114787750	NM_016234	ACSL5	chr10	114125945	661106
chr10	114808001	114809400	NM_016234	ACSL5	chr10	114125945	682756
chr10	114809801	114811250	NM_016234	ACSL5	chr10	114125945	684581
chr10	114842951	114844550	NM_016234	ACSL5	chr10	114125945	717806
chr10	114870401	114871650	NM_016234	ACSL5	chr10	114125945	745081
chr10	114970901	114972500	NM_016234	ACSL5	chr10	114125945	845756
chr10	115022401	115024200	NM_016234	ACSL5	chr10	114125945	897356
chr10	115272051	115273600	NM_016234	ACSL5	chr10	114125945	1146881
chr10	115276301	115277900	NM_016234	ACSL5	chr10	114125945	1151156
chr10	115288651	115289900	NM_016234	ACSL5	chr10	114125945	1163331
chr10	115429851	115431300	NM_016234	ACSL5	chr10	114125945	1304631
chr10	115460551	115462000	NM_016234	ACSL5	chr10	114125945	1335331
chr10	115603351	115604750	NM_016234	ACSL5	chr10	114125945	1478106
chr10	115603801	115605100	NM_016234	ACSL5	chr10	114125945	1478506
chr10	115735051	115736500	NM_016234	ACSL5	chr10	114125945	1609831
chr10	115748751	115750250	NM_016234	ACSL5	chr10	114125945	1623556
chr10	115752251	115753750	NM_016234	ACSL5	chr10	114125945	1627056
chr10	115792201	115793600	NM_016234	ACSL5	chr10	114125945	1666956
chr10	115993151	115994400	NM_016234	ACSL5	chr10	114125945	1867831
chr10	116056801	116058250	NM_016234	ACSL5	chr10	114125945	1931581
chr10	116275751	116277350	NM_016234	ACSL5	chr10	114125945	2150606
chr10	116402151	116403450	NM_016234	ACSL5	chr10	114125945	2276856
chr10	116433501	116435050	NM_016234	ACSL5	chr10	114125945	2308331
chr10	116624101	116625700	NM_016234	ACSL5	chr10	114125945	2498956
chr10	116753501	116754800	NM_016234	ACSL5	chr10	114125945	2628206
chr10	117688051	117689500	NM_016234	ACSL5	chr10	114125945	3562831
chr10	118431251	118432600	NM_016234	ACSL5	chr10	114125945	4305981
chr10	118440951	118442250	NM_016234	ACSL5	chr10	114125945	4315656
chr10	118536851	118538400	NM_016234	ACSL5	chr10	114125945	4411681
chr10	118545901	118547150	NM_016234	ACSL5	chr10	114125945	4420581
chr10	118642301	118643750	NM_016234	ACSL5	chr10	114125945	4517081
chr10	118839601	118841050	NM_016234	ACSL5	chr10	114125945	4714381
chr10	118845951	118847200	NM_016234	ACSL5	chr10	114125945	4720631
chr10	118881051	118882350	NM_016234	ACSL5	chr10	114125945	4755756
chr10	118881651	118883750	NM_016234	ACSL5	chr10	114125945	4756756
chr10	118883601	118885300	NM_016234	ACSL5	chr10	114125945	4758506
chr10	118885701	118887150	NM_016234	ACSL5	chr10	114125945	4760481
chr10	118923801	118925250	NM_016234	ACSL5	chr10	114125945	4798581
chr10	118943401	118944650	NM_016234	ACSL5	chr10	114125945	4818081
chr10	119191251	119192550	NM_016234	ACSL5	chr10	114125945	5065956
chr10	119225701	119227150	NM_016234	ACSL5	chr10	114125945	5100481
chr10	119307301	119308850	NM_016234	ACSL5	chr10	114125945	5182131
chr10	119318901	119320400	NM_016234	ACSL5	chr10	114125945	5193706
chr10	119545251	119546550	NM_016234	ACSL5	chr10	114125945	5419956
chr10	119579801	119581350	NM_016234	ACSL5	chr10	114125945	5454631
chr10	119629751	119631250	NM_016234	ACSL5	chr10	114125945	5504556
chr10	119865501	119867000	NM_016234	ACSL5	chr10	114125945	5740306
chr10	119876901	119878250	NM_016234	ACSL5	chr10	114125945	5751631
chr10	120090751	120092500	NM_016234	ACSL5	chr10	114125945	5965681
chr10	120127451	120128850	NM_016234	ACSL5	chr10	114125945	6002206
chr10	120280051	120281650	NM_016234	ACSL5	chr10	114125945	6154906
chr10	120581151	120582550	NM_016234	ACSL5	chr10	114125945	6455906
chr10	120913751	120915000	NM_016234	ACSL5	chr10	114125945	6788431
chr10	120955151	120956850	NM_016234	ACSL5	chr10	114125945	6830056
chr10	120957151	120958400	NM_016234	ACSL5	chr10	114125945	6831831
chr10	120986551	120988450	NM_016234	ACSL5	chr10	114125945	6861556
chr10	121070301	121071550	NM_016234	ACSL5	chr10	114125945	6944981
chr10	121085001	121086500	NM_016234	ACSL5	chr10	114125945	6959806
chr10	121093651	121095100	NM_016234	ACSL5	chr10	114125945	6968431
chr10	121095301	121096600	NM_016234	ACSL5	chr10	114125945	6970006
chr10	121154301	121155750	NM_016234	ACSL5	chr10	114125945	7029081
chr10	121369801	121371100	NM_016234	ACSL5	chr10	114125945	7244506
chr10	121399801	121401050	NM_016234	ACSL5	chr10	114125945	7274481
chr10	121536401	121537950	NM_016234	ACSL5	chr10	114125945	7411231
chr10	121641151	121642950	NM_016234	ACSL5	chr10	114125945	7516106
chr10	122600001	122601750	NM_016234	ACSL5	chr10	114125945	8474931
chr10	122692051	122693300	NM_016234	ACSL5	chr10	114125945	8566731
chr10	123677101	123678400	NM_016234	ACSL5	chr10	114125945	9551806
chr10	123897501	123898800	NM_004052	BNIP3	chr10	133645425	9747274
chr10	124043551	124044800	NM_004052	BNIP3	chr10	133645425	9601249
chr10	124090351	124091700	NM_004052	BNIP3	chr10	133645425	9554399
chr10	124223001	124224500	NM_004052	BNIP3	chr10	133645425	9421674
chr10	124628101	124629500	NM_004052	BNIP3	chr10	133645425	9016624
chr10	124703001	124704500	NM_004052	BNIP3	chr10	133645425	8941674
chr10	124881851	124883100	NM_004052	BNIP3	chr10	133645425	8762949
chr10	124903101	124904350	NM_004052	BNIP3	chr10	133645425	8741699
chr10	124990851	124992200	NM_004052	BNIP3	chr10	133645425	8653899
chr10	125803001	125804350	NM_004052	BNIP3	chr10	133645425	7841749
chr10	125911051	125912500	NM_004052	BNIP3	chr10	133645425	7733649
chr10	125945351	125946750	NM_004052	BNIP3	chr10	133645425	7699374
chr10	126019151	126020500	NM_004052	BNIP3	chr10	133645425	7625599
chr10	126032751	126034250	NM_004052	BNIP3	chr10	133645425	7611924
chr10	126400901	126402150	NM_004052	BNIP3	chr10	133645425	7243899
chr10	126588551	126589950	NM_004052	BNIP3	chr10	133645425	7056174
chr10	126836601	126837950	NM_004052	BNIP3	chr10	133645425	6808149
chr10	127304701	127306250	NM_004052	BNIP3	chr10	133645425	6339949
chr10	127362551	127364100	NM_004052	BNIP3	chr10	133645425	6282099
chr10	127501301	127502650	NM_004052	BNIP3	chr10	133645425	6143449
chr10	127573501	127575000	NM_004052	BNIP3	chr10	133645425	6071174
chr10	127574851	127576150	NM_004052	BNIP3	chr10	133645425	6069924
chr10	127719701	127721250	NM_004052	BNIP3	chr10	133645425	5924949
chr10	127721451	127723050	NM_004052	BNIP3	chr10	133645425	5923174
chr10	127795201	127796650	NM_004052	BNIP3	chr10	133645425	5849499
chr10	127834601	127836000	NM_004052	BNIP3	chr10	133645425	5810124
chr10	127914451	127916050	NM_004052	BNIP3	chr10	133645425	5730174
chr10	128141401	128142700	NM_004052	BNIP3	chr10	133645425	5503374
chr10	128769551	128771000	NM_004052	BNIP3	chr10	133645425	4875149
chr10	128813151	128814550	NM_004052	BNIP3	chr10	133645425	4831574
chr10	128958101	128959400	NM_004052	BNIP3	chr10	133645425	4686674
chr10	129674301	129675750	NM_004052	BNIP3	chr10	133645425	3970399
chr10	129675201	129676600	NM_004052	BNIP3	chr10	133645425	3969524
chr10	129750751	129752200	NM_004052	BNIP3	chr10	133645425	3893949
chr10	129962701	129964200	NM_004052	BNIP3	chr10	133645425	3681974
chr10	130025501	130026800	NM_004052	BNIP3	chr10	133645425	3619274
chr10	130214501	130215950	NM_004052	BNIP3	chr10	133645425	3430199
chr10	130227601	130229200	NM_004052	BNIP3	chr10	133645425	3417024
chr10	130294951	130296200	NM_004052	BNIP3	chr10	133645425	3349849
chr10	130719251	130720800	NM_004052	BNIP3	chr10	133645425	2925399
chr10	130730501	130731800	NM_004052	BNIP3	chr10	133645425	2914274
chr10	130828601	130829850	NM_004052	BNIP3	chr10	133645425	2816199
chr10	130853501	130855000	NM_004052	BNIP3	chr10	133645425	2791174
chr10	130959951	130961300	NM_004052	BNIP3	chr10	133645425	2684799
chr10	130981851	130983100	NM_004052	BNIP3	chr10	133645425	2662949
chr10	131019151	131020700	NM_004052	BNIP3	chr10	133645425	2625499
chr10	131184751	131186100	NM_004052	BNIP3	chr10	133645425	2459999
chr10	131316401	131318000	NM_004052	BNIP3	chr10	133645425	2328224
chr10	131637701	131639350	NM_004052	BNIP3	chr10	133645425	2006899
chr10	131638951	131640200	NM_004052	BNIP3	chr10	133645425	2005849
chr10	131646201	131647550	NM_004052	BNIP3	chr10	133645425	1998549
chr10	131647801	131649100	NM_004052	BNIP3	chr10	133645425	1996974
chr10	131658151	131659600	NM_004052	BNIP3	chr10	133645425	1986549
chr10	132112351	132113750	NM_004052	BNIP3	chr10	133645425	1532374
chr10	132236101	132237450	NM_004052	BNIP3	chr10	133645425	1408649
chr10	132254751	132256050	NM_004052	BNIP3	chr10	133645425	1390024
chr10	132293601	132295100	NM_004052	BNIP3	chr10	133645425	1351074
chr10	132319201	132320650	NM_004052	BNIP3	chr10	133645425	1325499
chr10	132444451	132446100	NM_004052	BNIP3	chr10	133645425	1200149
chr10	132556901	132558400	NM_004052	BNIP3	chr10	133645425	1087774
chr10	132723751	132725100	NM_004052	BNIP3	chr10	133645425	920999
chr10	132998251	132999700	NM_004052	BNIP3	chr10	133645425	646449
chr10	133009051	133010400	NM_004052	BNIP3	chr10	133645425	635699
chr10	133011451	133013050	NM_004052	BNIP3	chr10	133645425	633174
chr10	133370451	133371950	NM_004052	BNIP3	chr10	133645425	274224
chr10	133388301	133389800	NM_004052	BNIP3	chr10	133645425	256374
chr10	133624751	133626150	NM_004052	BNIP3	chr10	133645425	19974
chr10	133635651	133637000	NM_004052	BNIP3	chr10	133645425	9099
chr10	133686051	133687350	NM_004052	BNIP3	chr10	133645425	41276
chr10	133705001	133706350	NM_004052	BNIP3	chr10	133645425	60251
chr10	133795301	133796700	NM_004052	BNIP3	chr10	133645425	150576
chr10	133992801	133994250	NM_004052	BNIP3	chr10	133645425	348101
chr10	134074451	134076150	NM_004052	BNIP3	chr10	133645425	429876
chr10	134197651	134198900	NM_004052	BNIP3	chr10	133645425	552851
chr10	134251201	134252900	NM_004052	BNIP3	chr10	133645425	606626
chr10	134330351	134331750	NM_004052	BNIP3	chr10	133645425	685626
chr10	134363351	134364900	NM_004052	BNIP3	chr10	133645425	718701
chr10	134456751	134458200	NM_004052	BNIP3	chr10	133645425	812051
chr10	134542151	134543450	NM_004052	BNIP3	chr10	133645425	897376
chr10	134685701	134687100	NM_004052	BNIP3	chr10	133645425	1040976
chr10	134755551	134757000	NM_004052	BNIP3	chr10	133645425	1110851
chr11	226301	227700	NM_021932	RIC8A	chr11	198529	28472
chr11	297551	298800	NM_021932	RIC8A	chr11	198529	99647
chr11	316501	317800	NM_021932	RIC8A	chr11	198529	118622
chr11	404451	405900	NM_021932	RIC8A	chr11	198529	206647
chr11	1280001	1281300	NM_024698	SLC25A22	chr11	786221	494430
chr11	1368751	1370200	NM_024698	SLC25A22	chr11	786221	583255
chr11	1439701	1441050	NM_024698	SLC25A22	chr11	786221	654155
chr11	1566451	1567700	NM_024698	SLC25A22	chr11	786221	780855
chr11	2377451	2379000	NM_024698	SLC25A22	chr11	786221	1592005
chr11	2789501	2791000	NM_024698	SLC25A22	chr11	786221	2004030
chr11	2875951	2877350	NM_024698	SLC25A22	chr11	786221	2090430
chr11	3029551	3030800	NM_001005160	OR52A5	chr11	5110448	2080272
chr11	3356301	3357600	NM_001005160	OR52A5	chr11	5110448	1753497
chr11	3781501	3782850	NM_001005160	OR52A5	chr11	5110448	1328272
chr11	3871501	3872800	NM_001005160	OR52A5	chr11	5110448	1238297
chr11	4075401	4076850	NM_001005160	OR52A5	chr11	5110448	1034322
chr11	6362501	6364050	NM_012402	ARFIP2	chr11	6459171	95895
chr11	6367101	6368500	NM_012402	ARFIP2	chr11	6459171	91370
chr11	6451451	6452750	NM_012402	ARFIP2	chr11	6459171	7070
chr11	6458651	6460100	NM_178168	OR10A5	chr11	6823489	364113
chr11	6545801	6547050	NM_012402	ARFIP2	chr11	6459171	87255
chr11	6554001	6555500	NM_012402	ARFIP2	chr11	6459171	95580
chr11	6589651	6590950	NM_012402	ARFIP2	chr11	6459171	131130
chr11	6612751	6614400	NM_012402	ARFIP2	chr11	6459171	154405
chr11	6624001	6625600	NM_012402	ARFIP2	chr11	6459171	165630
chr11	6624751	6626000	NM_012402	ARFIP2	chr11	6459171	166205
chr11	7555101	7556600	NM_178168	OR10A5	chr11	6823489	732362
chr11	7964551	7966000	NM_182901	C11orf17	chr11	8889377	924101
chr11	8185101	8186550	NM_182901	C11orf17	chr11	8889377	703551
chr11	8260601	8261850	NM_182901	C11orf17	chr11	8889377	628151
chr11	8260901	8262250	NM_182901	C11orf17	chr11	8889377	627801
chr11	8590551	8591850	NM_182901	C11orf17	chr11	8889377	298176
chr11	8666301	8667850	NM_182901	C11orf17	chr11	8889377	222301
chr11	8692951	8694300	NM_182901	C11orf17	chr11	8889377	195751
chr11	8792601	8793900	NM_182901	C11orf17	chr11	8889377	96126
chr11	8843151	8844400	NM_182901	C11orf17	chr11	8889377	45601
chr11	8891851	8893100	NM_182901	C11orf17	chr11	8889377	3099
chr11	9008201	9009700	NM_182901	C11orf17	chr11	8889377	119574
chr11	9098251	9099700	NM_182901	C11orf17	chr11	8889377	209599
chr11	9134251	9135750	NM_182901	C11orf17	chr11	8889377	245624
chr11	9292451	9293700	NM_182901	C11orf17	chr11	8889377	403699
chr11	9341601	9343250	NM_182901	C11orf17	chr11	8889377	453049
chr11	9438301	9439800	NM_182901	C11orf17	chr11	8889377	549674
chr11	10285801	10287050	NM_182901	C11orf17	chr11	8889377	1397049
chr11	10392201	10393650	NM_182901	C11orf17	chr11	8889377	1503549
chr11	10433501	10434800	NM_182901	C11orf17	chr11	8889377	1544774
chr11	10534101	10535600	NM_182901	C11orf17	chr11	8889377	1645474
chr11	10583601	10585150	NM_182901	C11orf17	chr11	8889377	1694999
chr11	10601101	10602550	NM_182901	C11orf17	chr11	8889377	1712449
chr11	10603001	10604450	NM_182901	C11orf17	chr11	8889377	1714349
chr11	10728601	10730000	NM_182901	C11orf17	chr11	8889377	1839924
chr11	10785251	10786750	NM_021961	TEAD1	chr11	12652544	1866543
chr11	10835351	10836700	NM_021961	TEAD1	chr11	12652544	1816518
chr11	11513251	11514700	NM_021961	TEAD1	chr11	12652544	1138568
chr11	11954851	11956300	NM_021961	TEAD1	chr11	12652544	696968
chr11	11957001	11958250	NM_021961	TEAD1	chr11	12652544	694918
chr11	12044251	12046000	NM_021961	TEAD1	chr11	12652544	607418
chr11	12163451	12164950	NM_021961	TEAD1	chr11	12652544	488343
chr11	12167101	12168600	NM_021961	TEAD1	chr11	12652544	484693
chr11	12355751	12357100	NM_021961	TEAD1	chr11	12652544	296118
chr11	12654751	12656200	NM_021961	TEAD1	chr11	12652544	2932
chr11	12671401	12672900	NM_021961	TEAD1	chr11	12652544	19607
chr11	12702051	12703350	NM_021961	TEAD1	chr11	12652544	50157
chr11	12805651	12806950	NM_021961	TEAD1	chr11	12652544	153757
chr11	12863401	12864800	NM_021961	TEAD1	chr11	12652544	211557
chr11	13440151	13441650	NM_021961	TEAD1	chr11	12652544	788357
chr11	13722751	13724150	NM_021961	TEAD1	chr11	12652544	1070907
chr11	14337351	14338600	NM_021961	TEAD1	chr11	12652544	1685432
chr11	14868651	14870100	NM_021961	TEAD1	chr11	12652544	2216832
chr11	15052101	15053550	NM_005013	NUCB2	chr11	17254861	2202035
chr11	15211101	15212550	NM_005013	NUCB2	chr11	17254861	2043035
chr11	15276351	15277750	NM_005013	NUCB2	chr11	17254861	1977810
chr11	15285151	15286750	NM_005013	NUCB2	chr11	17254861	1968910
chr11	15628851	15630100	NM_005013	NUCB2	chr11	17254861	1625385
chr11	15820851	15822450	NM_005013	NUCB2	chr11	17254861	1433210
chr11	16103301	16104650	NM_005013	NUCB2	chr11	17254861	1150885
chr11	16327101	16328600	NM_005013	NUCB2	chr11	17254861	927010
chr11	16351251	16352750	NM_005013	NUCB2	chr11	17254861	902860
chr11	16584201	16585550	NM_005013	NUCB2	chr11	17254861	669985
chr11	16591151	16592400	NM_005013	NUCB2	chr11	17254861	663085
chr11	17055101	17056500	NM_005013	NUCB2	chr11	17254861	199060
chr11	17135501	17136800	NM_005013	NUCB2	chr11	17254861	118710
chr11	17187001	17188400	NM_005013	NUCB2	chr11	17254861	67160
chr11	17254801	17256050	NM_006906	PTPN5	chr11	18769965	1514539
chr11	17699651	17701050	NM_005013	NUCB2	chr11	17254861	445490
chr11	17851201	17852650	NM_005013	NUCB2	chr11	17254861	597065
chr11	17990951	17992200	NM_005013	NUCB2	chr11	17254861	736715
chr11	18361001	18362350	NM_006906	PTPN5	chr11	18769965	408289
chr11	18373851	18375100	NM_006906	PTPN5	chr11	18769965	395489
chr11	18504301	18505900	NM_006906	PTPN5	chr11	18769965	264864
chr11	18566101	18567750	NM_006906	PTPN5	chr11	18769965	203039
chr11	18786651	18788150	NM_006906	PTPN5	chr11	18769965	17436
chr11	18949901	18951400	NM_006906	PTPN5	chr11	18769965	180686
chr11	19555051	19557000	NM_006906	PTPN5	chr11	18769965	786061
chr11	19573901	19575200	NM_006906	PTPN5	chr11	18769965	804586
chr11	20256101	20257450	NM_006906	PTPN5	chr11	18769965	1486811
chr11	22469601	22470850	NM_006906	PTPN5	chr11	18769965	3700261
chr11	22602551	22604150	NM_006906	PTPN5	chr11	18769965	3833386
chr11	22603251	22604600	NM_006906	PTPN5	chr11	18769965	3833961
chr11	22807551	22808950	NM_006906	PTPN5	chr11	18769965	4038286
chr11	23760501	23761750	NM_006906	PTPN5	chr11	18769965	4991161
chr11	25944751	25946000	NM_001584	MPPED2	chr11	30558616	4613240
chr11	27193301	27194650	NM_001584	MPPED2	chr11	30558616	3364640
chr11	27193801	27195250	NM_001584	MPPED2	chr11	30558616	3364090
chr11	27407451	27408700	NM_001584	MPPED2	chr11	30558616	3150540
chr11	27637101	27638450	NM_001584	MPPED2	chr11	30558616	2920840
chr11	28085601	28087050	NM_001584	MPPED2	chr11	30558616	2472290
chr11	30150401	30151950	NM_001584	MPPED2	chr11	30558616	407440
chr11	30300451	30301800	NM_001584	MPPED2	chr11	30558616	257490
chr11	30366051	30367600	NM_001584	MPPED2	chr11	30558616	191790
chr11	30542801	30544050	NM_001584	MPPED2	chr11	30558616	15190
chr11	30561801	30563250	NM_001584	MPPED2	chr11	30558616	3910
chr11	30790401	30791800	NM_001584	MPPED2	chr11	30558616	232485
chr11	31347251	31348750	NM_001584	MPPED2	chr11	30558616	789385
chr11	32398451	32399900	NM_005574	LMO2	chr11	33870412	1471236
chr11	32869851	32871150	NM_005574	LMO2	chr11	33870412	999911
chr11	33138951	33140200	NM_005574	LMO2	chr11	33870412	730836
chr11	33235851	33237450	NM_005574	LMO2	chr11	33870412	633761
chr11	33669551	33670900	NM_005574	LMO2	chr11	33870412	200186
chr11	33814901	33816400	NM_005574	LMO2	chr11	33870412	54761
chr11	33847451	33848950	NM_005574	LMO2	chr11	33870412	22211
chr11	33848351	33849650	NM_005574	LMO2	chr11	33870412	21411
chr11	33876951	33878200	NM_005574	LMO2	chr11	33870412	7164
chr11	33912051	33913550	NM_005574	LMO2	chr11	33870412	42389
chr11	33919151	33920500	NM_005574	LMO2	chr11	33870412	49414
chr11	34023651	34025100	NM_005574	LMO2	chr11	33870412	153964
chr11	34416051	34417300	NM_005574	LMO2	chr11	33870412	546264
chr11	34787301	34788550	NM_005574	LMO2	chr11	33870412	917514
chr11	35595351	35596700	NM_005574	LMO2	chr11	33870412	1725614
chr11	35773701	35775250	NM_005574	LMO2	chr11	33870412	1904064
chr11	35829651	35831200	NM_005574	LMO2	chr11	33870412	1960014
chr11	36143401	36144750	NM_005574	LMO2	chr11	33870412	2273664
chr11	36177151	36178400	NM_005574	LMO2	chr11	33870412	2307364
chr11	36326851	36328400	NM_005574	LMO2	chr11	33870412	2457214
chr11	36351451	36352900	NM_005574	LMO2	chr11	33870412	2481764
chr11	36728851	36730350	NM_005574	LMO2	chr11	33870412	2859189
chr11	36898901	36900150	NM_005574	LMO2	chr11	33870412	3029114
chr11	36926601	36927900	NM_005574	LMO2	chr11	33870412	3056839
chr11	36952301	36953900	NM_005574	LMO2	chr11	33870412	3082689
chr11	37255651	37257150	NM_005574	LMO2	chr11	33870412	3385989
chr11	38379851	38381350	NM_005574	LMO2	chr11	33870412	4510189
chr11	39436101	39437550	NM_130783	TSPAN18	chr11	44742551	5305725
chr11	40271501	40272800	NM_130783	TSPAN18	chr11	44742551	4470400
chr11	41475551	41477000	NM_130783	TSPAN18	chr11	44742551	3266275
chr11	41829801	41831250	NM_130783	TSPAN18	chr11	44742551	2912025
chr11	42384851	42386350	NM_130783	TSPAN18	chr11	44742551	2356950
chr11	42664851	42666250	NM_130783	TSPAN18	chr11	44742551	2077000
chr11	43336201	43337450	NM_130783	TSPAN18	chr11	44742551	1405725
chr11	43664951	43666450	NM_130783	TSPAN18	chr11	44742551	1076850
chr11	43766201	43767450	NM_130783	TSPAN18	chr11	44742551	975725
chr11	43858201	43859450	NM_130783	TSPAN18	chr11	44742551	883725
chr11	43966901	43968300	NM_130783	TSPAN18	chr11	44742551	774950
chr11	44043801	44045200	NM_130783	TSPAN18	chr11	44742551	698050
chr11	44164401	44165700	NM_130783	TSPAN18	chr11	44742551	577500
chr11	44268601	44269850	NM_130783	TSPAN18	chr11	44742551	473325
chr11	44270751	44272000	NM_130783	TSPAN18	chr11	44742551	471175
chr11	44300501	44301950	NM_130783	TSPAN18	chr11	44742551	441325
chr11	44301151	44302600	NM_130783	TSPAN18	chr11	44742551	440675
chr11	44359751	44361250	NM_130783	TSPAN18	chr11	44742551	382050
chr11	44487101	44488350	NM_130783	TSPAN18	chr11	44742551	254825
chr11	44502501	44503900	NM_130783	TSPAN18	chr11	44742551	239350
chr11	44546751	44548200	NM_130783	TSPAN18	chr11	44742551	195075
chr11	44580551	44582000	NM_130783	TSPAN18	chr11	44742551	161275
chr11	44600901	44602500	NM_130783	TSPAN18	chr11	44742551	140850
chr11	44629451	44630850	NM_130783	TSPAN18	chr11	44742551	112400
chr11	44678201	44679500	NM_130783	TSPAN18	chr11	44742551	63700
chr11	44687551	44689200	NM_130783	TSPAN18	chr11	44742551	54175
chr11	44702951	44704300	NM_130783	TSPAN18	chr11	44742551	38925
chr11	44766451	44767800	NM_130783	TSPAN18	chr11	44742551	24575
chr11	44824601	44826050	NM_130783	TSPAN18	chr11	44742551	82775
chr11	44932551	44934100	NM_130783	TSPAN18	chr11	44742551	190775
chr11	44955301	44956750	NM_130783	TSPAN18	chr11	44742551	213475
chr11	44958301	44959550	NM_130783	TSPAN18	chr11	44742551	216375
chr11	45023901	45025200	NM_130783	TSPAN18	chr11	44742551	282000
chr11	45057851	45059200	NM_130783	TSPAN18	chr11	44742551	315975
chr11	45187401	45189150	NM_130783	TSPAN18	chr11	44742551	445725
chr11	45213401	45214700	NM_130783	TSPAN18	chr11	44742551	471500
chr11	45332951	45334250	NM_130783	TSPAN18	chr11	44742551	591050
chr11	45538701	45539950	NM_130783	TSPAN18	chr11	44742551	796775
chr11	45581551	45583200	NM_130783	TSPAN18	chr11	44742551	839825
chr11	45660851	45662350	NM_130783	TSPAN18	chr11	44742551	919050
chr11	46097201	46098500	NM_001003676	C11orf49	chr11	46914826	816975
chr11	46098101	46099850	NM_001003676	C11orf49	chr11	46914826	815850
chr11	46257551	46258800	NM_001003676	C11orf49	chr11	46914826	656650
chr11	46316801	46318150	NM_001003676	C11orf49	chr11	46914826	597350
chr11	46319751	46321350	NM_001003676	C11orf49	chr11	46914826	594275
chr11	46594901	46596300	NM_001003676	C11orf49	chr11	46914826	319225
chr11	46654301	46655900	NM_001003676	C11orf49	chr11	46914826	259725
chr11	46677701	46679850	NM_001003676	C11orf49	chr11	46914826	236050
chr11	46882551	46883800	NM_001003676	C11orf49	chr11	46914826	31650
chr11	46890151	46891850	NM_001003676	C11orf49	chr11	46914826	23825
chr11	46894101	46895750	NM_001003676	C11orf49	chr11	46914826	19900
chr11	46896701	46898250	NM_001003676	C11orf49	chr11	46914826	17350
chr11	46914251	46915500	NM_003682	MADD	chr11	47247774	332898
chr11	47226351	47227800	NM_003682	MADD	chr11	47247774	20698
chr11	47232401	47233800	NM_003682	MADD	chr11	47247774	14673
chr11	47246351	47248200	NM_001080547	SPI1	chr11	47356703	109427
chr11	47393851	47395100	NM_001080547	SPI1	chr11	47356703	37773
chr11	47444201	47445800	NM_001080547	SPI1	chr11	47356703	88298
chr11	47556301	47557900	NM_001080547	SPI1	chr11	47356703	200398
chr11	47745951	47747350	NM_002843	PTPRJ	chr11	47958685	212034
chr11	47924601	47925850	NM_002843	PTPRJ	chr11	47958685	33459
chr11	48044601	48046200	NM_002843	PTPRJ	chr11	47958685	86716
chr11	48147201	48148550	NM_002843	PTPRJ	chr11	47958685	189191
chr11	49185601	49187550	NM_002843	PTPRJ	chr11	47958685	1227891
chr11	49244651	49245950	NM_004476	FOLH1	chr11	49186798	58503
chr11	54945351	54946900	NM_001004740	OR5M1	chr11	56137554	1191428
chr11	55570951	55572350	NM_001004740	OR5M1	chr11	56137554	565903
chr11	56647101	56648600	NM_003627	SLC43A1	chr11	57039735	391884
chr11	56737051	56738500	NM_003627	SLC43A1	chr11	57039735	301959
chr11	56768301	56769750	NM_003627	SLC43A1	chr11	57039735	270709
chr11	56793051	56794550	NM_003627	SLC43A1	chr11	57039735	245934
chr11	56839151	56840550	NM_003627	SLC43A1	chr11	57039735	199884
chr11	56892051	56893400	NM_003627	SLC43A1	chr11	57039735	147009
chr11	56899001	56900450	NM_003627	SLC43A1	chr11	57039735	140009
chr11	56930051	56931600	NM_003627	SLC43A1	chr11	57039735	108909
chr11	56948251	56950100	NM_003627	SLC43A1	chr11	57039735	90559
chr11	56997001	56998450	NM_003627	SLC43A1	chr11	57039735	42009
chr11	57004901	57006350	NM_003627	SLC43A1	chr11	57039735	34109
chr11	57033151	57034450	NM_003627	SLC43A1	chr11	57039735	5934
chr11	57054051	57055700	NM_003627	SLC43A1	chr11	57039735	15141
chr11	57061701	57063300	NM_003627	SLC43A1	chr11	57039735	22766
chr11	57162901	57164500	NM_003627	SLC43A1	chr11	57039735	123966
chr11	57180651	57182050	NM_003627	SLC43A1	chr11	57039735	141616
chr11	57181151	57182600	NM_003627	SLC43A1	chr11	57039735	142141
chr11	57190701	57192150	NM_003627	SLC43A1	chr11	57039735	151691
chr11	57264651	57266300	NM_003627	SLC43A1	chr11	57039735	225741
chr11	57302051	57303300	NM_003627	SLC43A1	chr11	57039735	262941
chr11	57315801	57317150	NM_003627	SLC43A1	chr11	57039735	276741
chr11	58101051	58102950	NM_003627	SLC43A1	chr11	57039735	1062266
chr11	58102001	58103300	NM_003627	SLC43A1	chr11	57039735	1062916
chr11	58103051	58104550	NM_003627	SLC43A1	chr11	57039735	1064066
chr11	58666201	58667550	NM_152852	MS4A6A	chr11	59707250	1040374
chr11	58721651	58723050	NM_152852	MS4A6A	chr11	59707250	984899
chr11	58998751	59000000	NM_152852	MS4A6A	chr11	59707250	707874
chr11	59060851	59062300	NM_152852	MS4A6A	chr11	59707250	645674
chr11	59073901	59075400	NM_152852	MS4A6A	chr11	59707250	632599
chr11	59080801	59082300	NM_152852	MS4A6A	chr11	59707250	625699
chr11	59089151	59090500	NM_152852	MS4A6A	chr11	59707250	617424
chr11	59089551	59091100	NM_152852	MS4A6A	chr11	59707250	616924
chr11	59125101	59126350	NM_152852	MS4A6A	chr11	59707250	581524
chr11	59192801	59194250	NM_152852	MS4A6A	chr11	59707250	513724
chr11	59277701	59279050	NM_152852	MS4A6A	chr11	59707250	428874
chr11	59334151	59335600	NM_152852	MS4A6A	chr11	59707250	372374
chr11	59469201	59470700	NM_152852	MS4A6A	chr11	59707250	237299
chr11	60428751	60430150	NM_031457	MS4A8B	chr11	60223622	205829
chr11	60430051	60431350	NM_031457	MS4A8B	chr11	60223622	207079
chr11	60546201	60547600	NM_015533	DAK	chr11	60857229	310328
chr11	60856851	60858200	NM_153611	CYBASC3	chr11	60886331	28805
chr11	60859701	60860950	NM_015533	DAK	chr11	60857229	3097
chr11	60885801	60887100	NM_015533	DAK	chr11	60857229	29222
chr11	60953501	60955000	NM_016499	TMEM216	chr11	60916440	37811
chr11	61029051	61030600	NM_016499	TMEM216	chr11	60916440	113386
chr11	61177801	61179300	NM_006133	DAGLA	chr11	61204485	25934
chr11	61316001	61317450	NM_006133	DAGLA	chr11	61204485	112241
chr11	61376701	61378250	NM_006133	DAGLA	chr11	61204485	172991
chr11	61445951	61447750	NM_006133	DAGLA	chr11	61204485	242366
chr11	61467501	61469000	NM_006133	DAGLA	chr11	61204485	263766
chr11	61474051	61475400	NM_006133	DAGLA	chr11	61204485	270241
chr11	61549301	61550600	NM_006133	DAGLA	chr11	61204485	345466
chr11	61556951	61558600	NM_006133	DAGLA	chr11	61204485	353291
chr11	61963651	61965050	NM_153265	EML3	chr11	62136813	172462
chr11	61967951	61969200	NM_153265	EML3	chr11	62136813	168237
chr11	62036251	62037750	NM_153265	EML3	chr11	62136813	99812
chr11	62068201	62069450	NM_153265	EML3	chr11	62136813	67987
chr11	62076851	62078300	NM_153265	EML3	chr11	62136813	59237
chr11	62079151	62080450	NM_153265	EML3	chr11	62136813	57012
chr11	62098201	62099750	NM_153265	EML3	chr11	62136813	37837
chr11	62114801	62116400	NM_153265	EML3	chr11	62136813	21212
chr11	62122901	62124200	NM_153265	EML3	chr11	62136813	13262
chr11	62145701	62147000	NM_153265	EML3	chr11	62136813	9538
chr11	62176851	62178100	NM_153265	EML3	chr11	62136813	40663
chr11	62194801	62196250	NM_153265	EML3	chr11	62136813	58713
chr11	62202451	62203950	NM_153265	EML3	chr11	62136813	66388
chr11	62251951	62253600	NM_024784	ZBTB3	chr11	62278232	25456
chr11	62285051	62286350	NM_024784	ZBTB3	chr11	62278232	7469
chr11	62315501	62316800	NM_024784	ZBTB3	chr11	62278232	37919
chr11	62330401	62331850	NM_001012661	SLC3A2	chr11	62380093	48967
chr11	62414601	62416200	NM_001012661	SLC3A2	chr11	62380093	35308
chr11	62668801	62670300	NM_001012661	SLC3A2	chr11	62380093	289458
chr11	63029051	63030850	NM_001012661	SLC3A2	chr11	62380093	649858
chr11	63034401	63036100	NM_033101	LGALS12	chr11	63030099	5152
chr11	63301851	63303250	NM_033101	LGALS12	chr11	63030099	272452
chr11	63319951	63321250	NM_033101	LGALS12	chr11	63030099	290502
chr11	63391951	63393400	NM_178443	FERMT3	chr11	63730727	338051
chr11	63393201	63394600	NM_178443	FERMT3	chr11	63730727	336826
chr11	63426151	63427600	NM_178443	FERMT3	chr11	63730727	303851
chr11	63430801	63432100	NM_178443	FERMT3	chr11	63730727	299276
chr11	63440951	63442450	NM_178443	FERMT3	chr11	63730727	289026
chr11	63497951	63499250	NM_178443	FERMT3	chr11	63730727	232126
chr11	63525651	63527000	NM_178443	FERMT3	chr11	63730727	204401
chr11	63618801	63620050	NM_178443	FERMT3	chr11	63730727	111301
chr11	63729851	63731350	NM_003377	VEGFB	chr11	63758841	28240
chr11	63730951	63732850	NM_178443	FERMT3	chr11	63730727	1174
chr11	63793401	63794850	NM_000932	PLCB3	chr11	63775697	18429
chr11	63840951	63842500	NM_000932	PLCB3	chr11	63775697	66029
chr11	63919451	63921150	NM_000932	PLCB3	chr11	63775697	144604
chr11	63972051	63973300	NM_000932	PLCB3	chr11	63775697	196979
chr11	64135301	64136850	NM_000932	PLCB3	chr11	63775697	360379
chr11	64268651	64270050	NM_000932	PLCB3	chr11	63775697	493654
chr11	64302551	64304050	NM_000932	PLCB3	chr11	63775697	527604
chr11	64325251	64326600	NM_000932	PLCB3	chr11	63775697	550229
chr11	64326951	64328300	NM_000932	PLCB3	chr11	63775697	551929
chr11	64513651	64515050	NM_002419	MAP3K11	chr11	65138296	623945
chr11	64619501	64620850	NM_002419	MAP3K11	chr11	65138296	518120
chr11	64641101	64642450	NM_002419	MAP3K11	chr11	65138296	496520
chr11	64658051	64659350	NM_002419	MAP3K11	chr11	65138296	479595
chr11	64745901	64747350	NM_002419	MAP3K11	chr11	65138296	391670
chr11	64814251	64815750	NM_002419	MAP3K11	chr11	65138296	323295
chr11	64880601	64882050	NM_002419	MAP3K11	chr11	65138296	256970
chr11	64905951	64907800	NM_002419	MAP3K11	chr11	65138296	231420
chr11	64907851	64909250	NM_002419	MAP3K11	chr11	65138296	229745
chr11	64942301	64943950	NM_002419	MAP3K11	chr11	65138296	195170
chr11	64943451	64944850	NM_002419	MAP3K11	chr11	65138296	194145
chr11	64944601	64946100	NM_002419	MAP3K11	chr11	65138296	192945
chr11	64945351	64946600	NM_002419	MAP3K11	chr11	65138296	192320
chr11	64946001	64947350	NM_002419	MAP3K11	chr11	65138296	191620
chr11	65022301	65023850	NM_002419	MAP3K11	chr11	65138296	115220
chr11	65032051	65033300	NM_002419	MAP3K11	chr11	65138296	105620
chr11	65097901	65099300	NM_002419	MAP3K11	chr11	65138296	39695
chr11	65134901	65136500	NM_002419	MAP3K11	chr11	65138296	2595
chr11	65163651	65165000	NM_002419	MAP3K11	chr11	65138296	26030
chr11	65235251	65236800	NM_002419	MAP3K11	chr11	65138296	97730
chr11	65327251	65328500	NM_025128	MUS81	chr11	65384447	56571
chr11	65383801	65385100	NM_006848	CCDC85B	chr11	65414450	29999
chr11	65394251	65395500	NM_025128	MUS81	chr11	65384447	10429
chr11	65415151	65416650	NM_006848	CCDC85B	chr11	65414450	1451
chr11	65525501	65527150	NM_006848	CCDC85B	chr11	65414450	111876
chr11	65539051	65540350	NM_032325	EIF1AD	chr11	65526154	13547
chr11	65555451	65556750	NM_032325	EIF1AD	chr11	65526154	29947
chr11	65737851	65739300	NM_022822	KLC2	chr11	65781749	43173
chr11	65780651	65781900	NM_145065	PELI3	chr11	65990911	209635
chr11	65841401	65842700	NM_022822	KLC2	chr11	65781749	60302
chr11	65852001	65853350	NM_022822	KLC2	chr11	65781749	70927
chr11	65871501	65872850	NM_022822	KLC2	chr11	65781749	90427
chr11	65895801	65897100	NM_145065	PELI3	chr11	65990911	94460
chr11	66003851	66005250	NM_145065	PELI3	chr11	65990911	13640
chr11	66140851	66142150	NM_145065	PELI3	chr11	65990911	150590
chr11	66162551	66163800	NM_145065	PELI3	chr11	65990911	172265
chr11	66250751	66252300	NM_001040716	PC	chr11	66482423	230897
chr11	66379351	66380850	NM_001040716	PC	chr11	66482423	102322
chr11	66475601	66476950	NM_001040716	PC	chr11	66482423	6147
chr11	66491251	66493250	NM_001040716	PC	chr11	66482423	9828
chr11	66511351	66512700	NM_001040716	PC	chr11	66482423	29603
chr11	66600501	66601800	NM_001040716	PC	chr11	66482423	118728
chr11	66763101	66764350	NM_001619	ADRBK1	chr11	66790480	26754
chr11	66763601	66764850	NM_001619	ADRBK1	chr11	66790480	26254
chr11	66786201	66787750	NM_001619	ADRBK1	chr11	66790480	3504
chr11	66793601	66795350	NM_001619	ADRBK1	chr11	66790480	3996
chr11	66795251	66796550	NM_001619	ADRBK1	chr11	66790480	5421
chr11	66800951	66802450	NM_001619	ADRBK1	chr11	66790480	11221
chr11	66811801	66813150	NM_001619	ADRBK1	chr11	66790480	21996
chr11	66925601	66926900	NM_001619	ADRBK1	chr11	66790480	135771
chr11	67006501	67007900	NM_007103	NDUFV1	chr11	67130898	123697
chr11	67645701	67647200	NM_007103	NDUFV1	chr11	67130898	515553
chr11	67776901	67778350	NM_007103	NDUFV1	chr11	67130898	646728
chr11	67851801	67853150	NM_007103	NDUFV1	chr11	67130898	721578
chr11	67897501	67899200	NM_007103	NDUFV1	chr11	67130898	767453
chr11	67903801	67905300	NM_007103	NDUFV1	chr11	67130898	773653
chr11	67960901	67962250	NM_007103	NDUFV1	chr11	67130898	830678
chr11	68230451	68232000	NM_007103	NDUFV1	chr11	67130898	1100328
chr11	68362501	68364050	NM_007103	NDUFV1	chr11	67130898	1232378
chr11	68363551	68364850	NM_007103	NDUFV1	chr11	67130898	1233303
chr11	68379301	68380550	NM_007103	NDUFV1	chr11	67130898	1249028
chr11	68654101	68655550	NM_007103	NDUFV1	chr11	67130898	1523928
chr11	68820501	68822650	NM_007103	NDUFV1	chr11	67130898	1690678
chr11	68835251	68837000	NM_007103	NDUFV1	chr11	67130898	1705228
chr11	69061851	69064200	NM_007103	NDUFV1	chr11	67130898	1932128
chr11	69145401	69146850	NM_007103	NDUFV1	chr11	67130898	2015228
chr11	69509651	69511050	NM_001567	INPPL1	chr11	71613529	2103178
chr11	69540351	69541600	NM_001567	INPPL1	chr11	71613529	2072553
chr11	69595551	69597000	NM_001567	INPPL1	chr11	71613529	2017253
chr11	69596151	69597800	NM_001567	INPPL1	chr11	71613529	2016553
chr11	69597001	69598500	NM_001567	INPPL1	chr11	71613529	2015778
chr11	69619051	69620350	NM_001567	INPPL1	chr11	71613529	1993828
chr11	69651401	69652950	NM_001567	INPPL1	chr11	71613529	1961353
chr11	69890251	69891650	NM_001567	INPPL1	chr11	71613529	1722578
chr11	70193751	70195150	NM_001567	INPPL1	chr11	71613529	1419078
chr11	70349601	70350950	NM_001567	INPPL1	chr11	71613529	1263253
chr11	70629301	70630850	NM_001567	INPPL1	chr11	71613529	983453
chr11	70726601	70728050	NM_001567	INPPL1	chr11	71613529	886203
chr11	70774501	70775800	NM_001567	INPPL1	chr11	71613529	838378
chr11	70778951	70780400	NM_001567	INPPL1	chr11	71613529	833853
chr11	70840351	70841950	NM_001567	INPPL1	chr11	71613529	772378
chr11	71386851	71388250	NM_001567	INPPL1	chr11	71613529	225978
chr11	71393501	71394750	NM_001567	INPPL1	chr11	71613529	219403
chr11	71468701	71470350	NM_001567	INPPL1	chr11	71613529	144003
chr11	71500801	71502250	NM_001567	INPPL1	chr11	71613529	112003
chr11	71611551	71612800	NM_001567	INPPL1	chr11	71613529	1353
chr11	72110201	72111800	NM_014824	FCHSD2	chr11	72530791	419790
chr11	72124601	72125900	NM_014824	FCHSD2	chr11	72530791	405540
chr11	72124951	72126200	NM_014824	FCHSD2	chr11	72530791	405215
chr11	72530551	72531800	NM_003355	UCP2	chr11	73371537	840361
chr11	72531251	72532500	NM_014824	FCHSD2	chr11	72530791	1085
chr11	72538001	72539550	NM_014824	FCHSD2	chr11	72530791	7985
chr11	72555851	72557200	NM_014824	FCHSD2	chr11	72530791	25735
chr11	72617851	72619100	NM_014824	FCHSD2	chr11	72530791	87685
chr11	72676901	72678150	NM_014824	FCHSD2	chr11	72530791	146735
chr11	72680601	72682100	NM_014824	FCHSD2	chr11	72530791	150560
chr11	72776751	72778300	NM_014824	FCHSD2	chr11	72530791	246735
chr11	73053451	73054850	NM_003355	UCP2	chr11	73371537	317386
chr11	73175951	73177200	NM_003355	UCP2	chr11	73371537	194961
chr11	73558901	73560600	NM_182904	P4HA3	chr11	73700347	140596
chr11	73709851	73711350	NM_182904	P4HA3	chr11	73700347	10254
chr11	73817601	73818900	NM_182904	P4HA3	chr11	73700347	117904
chr11	73856651	73858100	NM_182904	P4HA3	chr11	73700347	157029
chr11	73874951	73876350	NM_182904	P4HA3	chr11	73700347	175304
chr11	74059901	74061200	NM_182904	P4HA3	chr11	73700347	360204
chr11	74531251	74532800	NM_004041	ARRB1	chr11	74740521	208495
chr11	74548501	74549950	NM_004041	ARRB1	chr11	74740521	191295
chr11	74549651	74550900	NM_004041	ARRB1	chr11	74740521	190245
chr11	74583401	74585000	NM_004041	ARRB1	chr11	74740521	156320
chr11	74725451	74726800	NM_004041	ARRB1	chr11	74740521	14395
chr11	74728751	74730400	NM_004041	ARRB1	chr11	74740521	10945
chr11	74744851	74746300	NM_004041	ARRB1	chr11	74740521	5055
chr11	74787451	74788850	NM_004041	ARRB1	chr11	74740521	47630
chr11	74862551	74864050	NM_004041	ARRB1	chr11	74740521	122780
chr11	74864051	74865300	NM_004041	ARRB1	chr11	74740521	124155
chr11	74946451	74947950	NM_004041	ARRB1	chr11	74740521	206680
chr11	74947201	74948600	NM_004041	ARRB1	chr11	74740521	207380
chr11	74950651	74952800	NM_032564	DGAT2	chr11	75157425	205699
chr11	74970651	74972000	NM_032564	DGAT2	chr11	75157425	186099
chr11	75623901	75625200	NM_032564	DGAT2	chr11	75157425	467126
chr11	75626051	75627300	NM_032564	DGAT2	chr11	75157425	469251
chr11	75644451	75645800	NM_032564	DGAT2	chr11	75157425	487701
chr11	75727401	75728900	NM_032564	DGAT2	chr11	75157425	570726
chr11	75796601	75798100	NM_032564	DGAT2	chr11	75157425	639926
chr11	75965351	75966600	NM_004055	CAPN5	chr11	76455639	489663
chr11	75966551	75968100	NM_004055	CAPN5	chr11	76455639	488313
chr11	75976251	75978200	NM_004055	CAPN5	chr11	76455639	478413
chr11	76017651	76019050	NM_004055	CAPN5	chr11	76455639	437288
chr11	76156651	76158600	NM_004055	CAPN5	chr11	76455639	298013
chr11	76170951	76172350	NM_004055	CAPN5	chr11	76455639	283988
chr11	76195051	76196350	NM_004055	CAPN5	chr11	76455639	259938
chr11	76211901	76213150	NM_004055	CAPN5	chr11	76455639	243113
chr11	76273551	76275000	NM_004055	CAPN5	chr11	76455639	181363
chr11	76455451	76456800	NM_032564	DGAT2	chr11	75157425	1298701
chr11	76461751	76463200	NM_004055	CAPN5	chr11	76455639	6837
chr11	76520151	76521400	NM_004055	CAPN5	chr11	76455639	65137
chr11	76555651	76557100	NM_004055	CAPN5	chr11	76455639	100737
chr11	76563901	76565350	NM_004055	CAPN5	chr11	76455639	108987
chr11	76735301	76736750	NM_004055	CAPN5	chr11	76455639	280387
chr11	76765851	76767400	NM_004055	CAPN5	chr11	76455639	310987
chr11	76890101	76891350	NM_004055	CAPN5	chr11	76455639	435087
chr11	77025851	77027200	NM_004055	CAPN5	chr11	76455639	570887
chr11	77208901	77210200	NM_004055	CAPN5	chr11	76455639	753912
chr11	77352751	77354050	NM_004055	CAPN5	chr11	76455639	897762
chr11	77382601	77384400	NM_004055	CAPN5	chr11	76455639	927862
chr11	77428101	77429650	NM_004055	CAPN5	chr11	76455639	973237
chr11	77739001	77740250	NM_004055	CAPN5	chr11	76455639	1283987
chr11	77808451	77810300	NM_004055	CAPN5	chr11	76455639	1353737
chr11	78174201	78175650	NM_004055	CAPN5	chr11	76455639	1719287
chr11	78189551	78190900	NM_004055	CAPN5	chr11	76455639	1734587
chr11	78197001	78198550	NM_004055	CAPN5	chr11	76455639	1742137
chr11	78432551	78433800	NM_004055	CAPN5	chr11	76455639	1977537
chr11	80410701	80412200	NM_004055	CAPN5	chr11	76455639	3955812
chr11	81392201	81393550	NM_007166	PICALM	chr11	85457756	4064880
chr11	82138901	82140350	NM_007166	PICALM	chr11	85457756	3318130
chr11	82272001	82273450	NM_007166	PICALM	chr11	85457756	3185030
chr11	82289701	82291200	NM_007166	PICALM	chr11	85457756	3167305
chr11	82396101	82397500	NM_007166	PICALM	chr11	85457756	3060955
chr11	82581601	82583100	NM_007166	PICALM	chr11	85457756	2875405
chr11	82582201	82583450	NM_007166	PICALM	chr11	85457756	2874930
chr11	82582501	82583850	NM_007166	PICALM	chr11	85457756	2874580
chr11	82673801	82675350	NM_007166	PICALM	chr11	85457756	2783180
chr11	82674551	82675850	NM_007166	PICALM	chr11	85457756	2782555
chr11	83060201	83061500	NM_007166	PICALM	chr11	85457756	2396905
chr11	83122351	83123800	NM_007166	PICALM	chr11	85457756	2334680
chr11	83135301	83136650	NM_007166	PICALM	chr11	85457756	2321780
chr11	83214101	83215600	NM_007166	PICALM	chr11	85457756	2242905
chr11	83716401	83717650	NM_007166	PICALM	chr11	85457756	1740730
chr11	84331351	84332750	NM_007166	PICALM	chr11	85457756	1125705
chr11	85016351	85017650	NM_007166	PICALM	chr11	85457756	440755
chr11	85243201	85244700	NM_007166	PICALM	chr11	85457756	213805
chr11	85376601	85378000	NM_007166	PICALM	chr11	85457756	80455
chr11	85456151	85457650	NM_007166	PICALM	chr11	85457756	855
chr11	85457101	85458600	NM_012193	FZD4	chr11	86344081	886230
chr11	85539701	85541250	NM_007166	PICALM	chr11	85457756	82720
chr11	85632701	85634250	NM_007166	PICALM	chr11	85457756	175720
chr11	85690151	85691650	NM_007166	PICALM	chr11	85457756	233145
chr11	85776201	85777650	NM_007166	PICALM	chr11	85457756	319170
chr11	85849501	85850950	NM_007166	PICALM	chr11	85457756	392470
chr11	85903901	85905250	NM_012193	FZD4	chr11	86344081	439505
chr11	86344101	86345650	NM_012193	FZD4	chr11	86344081	795
chr11	86583301	86584750	NM_012193	FZD4	chr11	86344081	239945
chr11	86742051	86743550	NM_012193	FZD4	chr11	86344081	398720
chr11	86754701	86756000	NM_012193	FZD4	chr11	86344081	411270
chr11	86756901	86758500	NM_012193	FZD4	chr11	86344081	413620
chr11	87064001	87065250	NM_012193	FZD4	chr11	86344081	720545
chr11	87510751	87512000	NM_012193	FZD4	chr11	86344081	1167295
chr11	87710051	87711300	NM_012193	FZD4	chr11	86344081	1366595
chr11	87710601	87712000	NM_012193	FZD4	chr11	86344081	1367220
chr11	88107701	88109150	NM_012193	FZD4	chr11	86344081	1764345
chr11	88815051	88816500	NM_012193	FZD4	chr11	86344081	2471695
chr11	89506651	89508000	NM_012193	FZD4	chr11	86344081	3163245
chr11	89595151	89596800	NM_012193	FZD4	chr11	86344081	3251895
chr11	89622051	89623350	NM_012193	FZD4	chr11	86344081	3278620
chr11	90767001	90768250	NM_012193	FZD4	chr11	86344081	4423545
chr11	90874251	90875700	NM_012193	FZD4	chr11	86344081	4530895
chr11	91500901	91502150	NM_012193	FZD4	chr11	86344081	5157445
chr11	91958001	91959400	NM_012193	FZD4	chr11	86344081	5614620
chr11	92138101	92139950	NM_012193	FZD4	chr11	86344081	5794945
chr11	92213301	92214550	NM_012193	FZD4	chr11	86344081	5869845
chr11	92350951	92352500	NM_012193	FZD4	chr11	86344081	6007645
chr11	92651101	92652500	NM_012193	FZD4	chr11	86344081	6307720
chr11	92901201	92902600	NM_012193	FZD4	chr11	86344081	6557820
chr11	92901751	92903150	NM_012193	FZD4	chr11	86344081	6558370
chr11	92915751	92917200	NM_012193	FZD4	chr11	86344081	6572395
chr11	92958001	92959400	NM_012193	FZD4	chr11	86344081	6614620
chr11	93034351	93035600	NM_012193	FZD4	chr11	86344081	6690895
chr11	93113301	93114550	NM_012193	FZD4	chr11	86344081	6769845
chr11	93113651	93114900	NM_012193	FZD4	chr11	86344081	6770195
chr11	93114001	93115300	NM_012193	FZD4	chr11	86344081	6770570
chr11	93156301	93157700	NM_012193	FZD4	chr11	86344081	6812920
chr11	93500501	93502300	NM_012193	FZD4	chr11	86344081	7157320
chr11	93916151	93917500	NM_006106	YAP1	chr11	101486419	7569593
chr11	94024501	94025900	NM_006106	YAP1	chr11	101486419	7461218
chr11	94039551	94041000	NM_006106	YAP1	chr11	101486419	7446143
chr11	94104851	94106450	NM_006106	YAP1	chr11	101486419	7380768
chr11	94106801	94108300	NM_006106	YAP1	chr11	101486419	7378868
chr11	94148951	94150300	NM_006106	YAP1	chr11	101486419	7336793
chr11	94157801	94159300	NM_006106	YAP1	chr11	101486419	7327868
chr11	94298801	94300450	NM_006106	YAP1	chr11	101486419	7186793
chr11	94307051	94308550	NM_006106	YAP1	chr11	101486419	7178618
chr11	94310901	94312150	NM_006106	YAP1	chr11	101486419	7174893
chr11	94345901	94347350	NM_006106	YAP1	chr11	101486419	7139793
chr11	94447251	94448600	NM_006106	YAP1	chr11	101486419	7038493
chr11	94480451	94482050	NM_006106	YAP1	chr11	101486419	7005168
chr11	94708351	94709800	NM_006106	YAP1	chr11	101486419	6777343
chr11	94709651	94711300	NM_006106	YAP1	chr11	101486419	6775943
chr11	95161901	95163350	NM_006106	YAP1	chr11	101486419	6323793
chr11	95296151	95297650	NM_006106	YAP1	chr11	101486419	6189518
chr11	95434701	95435950	NM_006106	YAP1	chr11	101486419	6051093
chr11	95448651	95449900	NM_006106	YAP1	chr11	101486419	6037143
chr11	95528151	95529650	NM_006106	YAP1	chr11	101486419	5957518
chr11	95533751	95535050	NM_006106	YAP1	chr11	101486419	5952018
chr11	95535151	95536500	NM_006106	YAP1	chr11	101486419	5950593
chr11	95615201	95616900	NM_006106	YAP1	chr11	101486419	5870368
chr11	95679901	95681150	NM_006106	YAP1	chr11	101486419	5805893
chr11	95686951	95688200	NM_006106	YAP1	chr11	101486419	5798843
chr11	95761451	95763100	NM_006106	YAP1	chr11	101486419	5724143
chr11	96946301	96947600	NM_006106	YAP1	chr11	101486419	4539468
chr11	98331251	98332600	NM_006106	YAP1	chr11	101486419	3154493
chr11	98692101	98693550	NM_006106	YAP1	chr11	101486419	2793593
chr11	99470001	99471450	NM_006106	YAP1	chr11	101486419	2015693
chr11	99600751	99602150	NM_006106	YAP1	chr11	101486419	1884968
chr11	100317551	100318900	NM_006106	YAP1	chr11	101486419	1168193
chr11	100324951	100326400	NM_006106	YAP1	chr11	101486419	1160743
chr11	100910601	100911850	NM_006106	YAP1	chr11	101486419	575193
chr11	101422501	101423750	NM_006106	YAP1	chr11	101486419	63293
chr11	101424501	101425750	NM_006106	YAP1	chr11	101486419	61293
chr11	101485701	101487150	NM_002422	MMP3	chr11	102219552	733126
chr11	101486651	101488450	NM_006106	YAP1	chr11	101486419	1132
chr11	101722001	101724100	NM_006106	YAP1	chr11	101486419	236632
chr11	101828251	101829800	NM_006106	YAP1	chr11	101486419	342607
chr11	102016351	102017850	NM_002422	MMP3	chr11	102219552	202451
chr11	102105901	102107150	NM_002422	MMP3	chr11	102219552	113026
chr11	102297251	102298700	NM_002422	MMP3	chr11	102219552	78424
chr11	102346801	102348250	NM_002422	MMP3	chr11	102219552	127974
chr11	102371751	102373050	NM_002422	MMP3	chr11	102219552	152849
chr11	102433051	102434300	NM_002422	MMP3	chr11	102219552	214124
chr11	102467401	102468950	NM_002422	MMP3	chr11	102219552	248624
chr11	102484851	102486300	NM_002422	MMP3	chr11	102219552	266024
chr11	103012151	103013400	NM_002422	MMP3	chr11	102219552	793224
chr11	103539151	103540600	NM_033306	CASP4	chr11	104332632	792756
chr11	104104351	104105650	NM_033306	CASP4	chr11	104332632	227631
chr11	104532101	104533600	NM_052889	CARD16	chr11	104421261	111590
chr11	104978051	104979350	NM_052889	CARD16	chr11	104421261	557440
chr11	105196801	105198250	NM_052889	CARD16	chr11	104421261	776265
chr11	105311201	105312650	NM_052889	CARD16	chr11	104421261	890665
chr11	106052551	106053800	NM_052889	CARD16	chr11	104421261	1631915
chr11	106332501	106334000	NM_152587	C11orf65	chr11	107843468	1510217
chr11	106833101	106834600	NM_152587	C11orf65	chr11	107843468	1009617
chr11	106940601	106942350	NM_152587	C11orf65	chr11	107843468	901992
chr11	107001701	107003250	NM_152587	C11orf65	chr11	107843468	840992
chr11	107232201	107234000	NM_152587	C11orf65	chr11	107843468	610367
chr11	107597551	107599200	NM_152587	C11orf65	chr11	107843468	245092
chr11	107598301	107599800	NM_152587	C11orf65	chr11	107843468	244417
chr11	107842551	107844100	NM_052889	CARD16	chr11	104421261	3422065
chr11	107872951	107874500	NM_152587	C11orf65	chr11	107843468	30258
chr11	108722601	108724300	NM_152587	C11orf65	chr11	107843468	879983
chr11	108956501	108957900	NM_152587	C11orf65	chr11	107843468	1113733
chr11	108962151	108963650	NM_152587	C11orf65	chr11	107843468	1119433
chr11	109071651	109072900	NM_152587	C11orf65	chr11	107843468	1228808
chr11	109220901	109222150	NM_152587	C11orf65	chr11	107843468	1378058
chr11	109319301	109320700	NM_152587	C11orf65	chr11	107843468	1476533
chr11	109346601	109348000	NM_152587	C11orf65	chr11	107843468	1503833
chr11	109444701	109446200	NM_152587	C11orf65	chr11	107843468	1601983
chr11	109451701	109453000	NM_152587	C11orf65	chr11	107843468	1608883
chr11	109452051	109453450	NM_152587	C11orf65	chr11	107843468	1609283
chr11	109550951	109552200	NM_152587	C11orf65	chr11	107843468	1708108
chr11	109671001	109672250	NM_152587	C11orf65	chr11	107843468	1828158
chr11	109730101	109731650	NM_152587	C11orf65	chr11	107843468	1887408
chr11	109738601	109740100	NM_152587	C11orf65	chr11	107843468	1895883
chr11	109773351	109774700	NM_152587	C11orf65	chr11	107843468	1930558
chr11	109783301	109784550	NM_152587	C11orf65	chr11	107843468	1940458
chr11	109897651	109899050	NM_152587	C11orf65	chr11	107843468	2054883
chr11	110033301	110034550	NM_152587	C11orf65	chr11	107843468	2190458
chr11	110053951	110055200	NM_152587	C11orf65	chr11	107843468	2211108
chr11	110088351	110089650	NM_152587	C11orf65	chr11	107843468	2245533
chr11	110088751	110090150	NM_152587	C11orf65	chr11	107843468	2245983
chr11	110153251	110154650	NM_181351	NCAM1	chr11	112337204	2183253
chr11	110249601	110251100	NM_181351	NCAM1	chr11	112337204	2086853
chr11	110258901	110260550	NM_181351	NCAM1	chr11	112337204	2077478
chr11	110351101	110352550	NM_181351	NCAM1	chr11	112337204	1985378
chr11	110605851	110607100	NM_181351	NCAM1	chr11	112337204	1730728
chr11	110728401	110729650	NM_181351	NCAM1	chr11	112337204	1608178
chr11	110821851	110823400	NM_181351	NCAM1	chr11	112337204	1514578
chr11	110831401	110832650	NM_181351	NCAM1	chr11	112337204	1505178
chr11	110917151	110918850	NM_181351	NCAM1	chr11	112337204	1419203
chr11	111021201	111022450	NM_181351	NCAM1	chr11	112337204	1315378
chr11	111141901	111143300	NM_181351	NCAM1	chr11	112337204	1194603
chr11	111254601	111255850	NM_181351	NCAM1	chr11	112337204	1081978
chr11	111294101	111295650	NM_181351	NCAM1	chr11	112337204	1042328
chr11	111449351	111450850	NM_181351	NCAM1	chr11	112337204	887103
chr11	111461851	111463500	NM_181351	NCAM1	chr11	112337204	874528
chr11	111503751	111505550	NM_181351	NCAM1	chr11	112337204	832553
chr11	111510051	111511300	NM_181351	NCAM1	chr11	112337204	826528
chr11	111601401	111602750	NM_181351	NCAM1	chr11	112337204	735128
chr11	111667551	111668950	NM_181351	NCAM1	chr11	112337204	668953
chr11	111709751	111711500	NM_181351	NCAM1	chr11	112337204	626578
chr11	111874701	111876300	NM_181351	NCAM1	chr11	112337204	461703
chr11	111954551	111956000	NM_181351	NCAM1	chr11	112337204	381928
chr11	112160651	112161900	NM_181351	NCAM1	chr11	112337204	175928
chr11	112209651	112211000	NM_181351	NCAM1	chr11	112337204	126878
chr11	112211501	112212800	NM_181351	NCAM1	chr11	112337204	125053
chr11	112336851	112338150	NM_017868	TTC12	chr11	112690460	352959
chr11	112420501	112422100	NM_181351	NCAM1	chr11	112337204	84097
chr11	112618551	112619950	NM_017868	TTC12	chr11	112690460	71209
chr11	112757101	112758450	NM_017868	TTC12	chr11	112690460	67316
chr11	112759951	112761300	NM_017868	TTC12	chr11	112690460	70166
chr11	113081301	113082750	NM_017868	TTC12	chr11	112690460	391566
chr11	113153551	113154950	NM_017868	TTC12	chr11	112690460	463791
chr11	113253051	113254550	NM_017868	TTC12	chr11	112690460	563341
chr11	113350101	113351350	NM_017868	TTC12	chr11	112690460	660266
chr11	113367801	113369050	NM_017868	TTC12	chr11	112690460	677966
chr11	113377001	113378250	NM_017868	TTC12	chr11	112690460	687166
chr11	113451451	113452850	NM_017868	TTC12	chr11	112690460	761691
chr11	113466951	113468250	NM_017868	TTC12	chr11	112690460	777141
chr11	113514451	113516400	NM_017868	TTC12	chr11	112690460	824966
chr11	113523501	113525050	NM_017868	TTC12	chr11	112690460	833816
chr11	113535301	113536850	NM_017868	TTC12	chr11	112690460	845616
chr11	113538151	113539650	NM_017868	TTC12	chr11	112690460	848441
chr11	113543501	113545000	NM_017868	TTC12	chr11	112690460	853791
chr11	113546901	113548650	NM_017868	TTC12	chr11	112690460	857316
chr11	113682951	113684200	NM_017868	TTC12	chr11	112690460	993116
chr11	113715901	113717450	NM_017868	TTC12	chr11	112690460	1026216
chr11	113775601	113777000	NM_017868	TTC12	chr11	112690460	1085841
chr11	113776151	113777400	NM_017868	TTC12	chr11	112690460	1086316
chr11	114250951	114252200	NM_017868	TTC12	chr11	112690460	1561116
chr11	114666351	114667800	NM_017868	TTC12	chr11	112690460	1976616
chr11	114880151	114881400	NM_012104	BACE1	chr11	116692182	1811406
chr11	114998451	114999750	NM_012104	BACE1	chr11	116692182	1693081
chr11	115502201	115503600	NM_012104	BACE1	chr11	116692182	1189281
chr11	115512351	115513900	NM_012104	BACE1	chr11	116692182	1179056
chr11	116094351	116095800	NM_012104	BACE1	chr11	116692182	597106
chr11	116227601	116229100	NM_012104	BACE1	chr11	116692182	463831
chr11	116245601	116247050	NM_012104	BACE1	chr11	116692182	445856
chr11	116276051	116277300	NM_012104	BACE1	chr11	116692182	415506
chr11	116391651	116393050	NM_012104	BACE1	chr11	116692182	299831
chr11	116519251	116520750	NM_012104	BACE1	chr11	116692182	172181
chr11	116555151	116556450	NM_012104	BACE1	chr11	116692182	136381
chr11	116919201	116921000	NM_012104	BACE1	chr11	116692182	227919
chr11	117346201	117347550	NM_000733	CD3E	chr11	117680504	333628
chr11	117573901	117575150	NM_000733	CD3E	chr11	117680504	105978
chr11	117627351	117628900	NM_000733	CD3E	chr11	117680504	52378
chr11	117734651	117736300	NM_000733	CD3E	chr11	117680504	54972
chr11	117776651	117778550	NM_000733	CD3E	chr11	117680504	97097
chr11	117811401	117812800	NM_000733	CD3E	chr11	117680504	131597
chr11	117980851	117982100	NM_000733	CD3E	chr11	117680504	300972
chr11	118166551	118168250	NM_001467	SLC37A4	chr11	118406826	239425
chr11	118315651	118317100	NM_001467	SLC37A4	chr11	118406826	90450
chr11	118393551	118395150	NM_001467	SLC37A4	chr11	118406826	12475
chr11	118460551	118461850	NM_001467	SLC37A4	chr11	118406826	54375
chr11	118477151	118479000	NM_001467	SLC37A4	chr11	118406826	71250
chr11	118690851	118692250	NM_006288	THY1	chr11	118799456	107905
chr11	118797651	118799200	NM_006288	THY1	chr11	118799456	1030
chr11	118798851	118800150	NM_001467	SLC37A4	chr11	118406826	392675
chr11	118823001	118824350	NM_006288	THY1	chr11	118799456	24220
chr11	118935401	118936700	NM_006288	THY1	chr11	118799456	136595
chr11	119443601	119444850	NM_006288	THY1	chr11	118799456	644770
chr11	119553351	119554600	NM_006288	THY1	chr11	118799456	754520
chr11	119561601	119563100	NM_006288	THY1	chr11	118799456	762895
chr11	119572851	119574300	NM_006288	THY1	chr11	118799456	774120
chr11	119711301	119712850	NM_006288	THY1	chr11	118799456	912620
chr11	119712301	119714050	NM_006288	THY1	chr11	118799456	913720
chr11	120069901	120071500	NM_006288	THY1	chr11	118799456	1271245
chr11	120332401	120334050	NM_006288	THY1	chr11	118799456	1533770
chr11	120613001	120614500	NM_032873	UBASH3B	chr11	122031607	1417856
chr11	120852201	120853450	NM_032873	UBASH3B	chr11	122031607	1178781
chr11	120857851	120859200	NM_032873	UBASH3B	chr11	122031607	1173081
chr11	120993201	120994550	NM_032873	UBASH3B	chr11	122031607	1037731
chr11	121001551	121003000	NM_032873	UBASH3B	chr11	122031607	1029331
chr11	121031251	121032700	NM_032873	UBASH3B	chr11	122031607	999631
chr11	121072101	121073550	NM_032873	UBASH3B	chr11	122031607	958781
chr11	121097601	121100150	NM_032873	UBASH3B	chr11	122031607	932731
chr11	121152551	121153800	NM_032873	UBASH3B	chr11	122031607	878431
chr11	121156201	121157650	NM_032873	UBASH3B	chr11	122031607	874681
chr11	121261601	121263150	NM_032873	UBASH3B	chr11	122031607	769231
chr11	121304351	121306400	NM_032873	UBASH3B	chr11	122031607	726231
chr11	121305501	121307100	NM_032873	UBASH3B	chr11	122031607	725306
chr11	121477301	121478600	NM_032873	UBASH3B	chr11	122031607	553656
chr11	121555851	121557300	NM_032873	UBASH3B	chr11	122031607	475031
chr11	121604951	121606400	NM_032873	UBASH3B	chr11	122031607	425931
chr11	121605451	121606700	NM_032873	UBASH3B	chr11	122031607	425531
chr11	121816051	121817600	NM_032873	UBASH3B	chr11	122031607	214781
chr11	121899651	121900900	NM_032873	UBASH3B	chr11	122031607	131331
chr11	121956301	121957550	NM_032873	UBASH3B	chr11	122031607	74681
chr11	122009951	122011200	NM_032873	UBASH3B	chr11	122031607	21031
chr11	122063551	122064800	NM_032873	UBASH3B	chr11	122031607	32569
chr11	122091251	122092700	NM_032873	UBASH3B	chr11	122031607	60369
chr11	122102701	122104150	NM_032873	UBASH3B	chr11	122031607	71819
chr11	122117701	122119150	NM_032873	UBASH3B	chr11	122031607	86819
chr11	122133401	122135100	NM_032873	UBASH3B	chr11	122031607	102644
chr11	122257851	122259250	NM_032873	UBASH3B	chr11	122031607	226944
chr11	122258351	122260000	NM_032873	UBASH3B	chr11	122031607	227569
chr11	122274101	122275550	NM_032873	UBASH3B	chr11	122031607	243219
chr11	122437251	122438700	NM_032873	UBASH3B	chr11	122031607	406369
chr11	122437951	122439350	NM_032873	UBASH3B	chr11	122031607	407044
chr11	122512801	122514700	NM_032873	UBASH3B	chr11	122031607	482144
chr11	122525651	122527100	NM_032873	UBASH3B	chr11	122031607	494769
chr11	122586751	122588200	NM_018400	SCN3B	chr11	123030525	443049
chr11	122588751	122590100	NM_018400	SCN3B	chr11	123030525	441099
chr11	122660801	122662050	NM_018400	SCN3B	chr11	123030525	369099
chr11	122680501	122681950	NM_018400	SCN3B	chr11	123030525	349299
chr11	122736001	122737400	NM_018400	SCN3B	chr11	123030525	293824
chr11	122782651	122784050	NM_018400	SCN3B	chr11	123030525	247174
chr11	122805651	122806900	NM_018400	SCN3B	chr11	123030525	224249
chr11	123030251	123031650	NM_052959	PANX3	chr11	123986662	955711
chr11	123105051	123106300	NM_018400	SCN3B	chr11	123030525	75151
chr11	123116551	123117800	NM_018400	SCN3B	chr11	123030525	86651
chr11	123490651	123492100	NM_018400	SCN3B	chr11	123030525	460851
chr11	123856201	123857650	NM_052959	PANX3	chr11	123986662	129736
chr11	123997151	123998650	NM_052959	PANX3	chr11	123986662	11239
chr11	124099651	124101650	NM_052959	PANX3	chr11	123986662	113989
chr11	124106801	124108300	NM_052959	PANX3	chr11	123986662	120889
chr11	124175201	124176700	NM_052959	PANX3	chr11	123986662	189289
chr11	124251001	124252250	NM_052959	PANX3	chr11	123986662	264964
chr11	124273301	124274850	NM_052959	PANX3	chr11	123986662	287414
chr11	124328251	124329800	NM_052959	PANX3	chr11	123986662	342364
chr11	124549651	124551100	NM_052959	PANX3	chr11	123986662	563714
chr11	124550751	124552400	NM_052959	PANX3	chr11	123986662	564914
chr11	124566751	124568200	NM_052959	PANX3	chr11	123986662	580814
chr11	124576101	124577700	NM_052959	PANX3	chr11	123986662	590239
chr11	124633101	124634400	NM_052959	PANX3	chr11	123986662	647089
chr11	124655001	124656400	NM_052959	PANX3	chr11	123986662	669039
chr11	124661901	124663500	NM_052959	PANX3	chr11	123986662	676039
chr11	124672101	124673550	NM_052959	PANX3	chr11	123986662	686164
chr11	124721151	124722650	NM_016952	CDON	chr11	125438397	716496
chr11	124891801	124893050	NM_016952	CDON	chr11	125438397	545971
chr11	124966751	124968200	NM_016952	CDON	chr11	125438397	470921
chr11	124967501	124968800	NM_016952	CDON	chr11	125438397	470246
chr11	125000251	125001600	NM_016952	CDON	chr11	125438397	437471
chr11	125000851	125002200	NM_016952	CDON	chr11	125438397	436871
chr11	125119401	125120650	NM_016952	CDON	chr11	125438397	318371
chr11	125262101	125263600	NM_016952	CDON	chr11	125438397	175546
chr11	125396551	125397900	NM_016952	CDON	chr11	125438397	41171
chr11	125425051	125426350	NM_016952	CDON	chr11	125438397	12696
chr11	125489701	125491100	NM_016952	CDON	chr11	125438397	52004
chr11	125508601	125510050	NM_016952	CDON	chr11	125438397	70929
chr11	125515101	125516700	NM_016952	CDON	chr11	125438397	77504
chr11	125529401	125530800	NM_016952	CDON	chr11	125438397	91704
chr11	125549951	125551300	NM_016952	CDON	chr11	125438397	112229
chr11	125643301	125644600	NM_016952	CDON	chr11	125438397	205554
chr11	125715651	125717950	NM_016952	CDON	chr11	125438397	278404
chr11	125840401	125841950	NM_016952	CDON	chr11	125438397	402779
chr11	125842501	125844250	NM_016952	CDON	chr11	125438397	404979
chr11	125855251	125856700	NM_016952	CDON	chr11	125438397	417579
chr11	125918851	125920400	NM_016952	CDON	chr11	125438397	481229
chr11	125960601	125961900	NM_016952	CDON	chr11	125438397	522854
chr11	126089101	126090500	NM_016952	CDON	chr11	125438397	651404
chr11	126106401	126107800	NM_016952	CDON	chr11	125438397	668704
chr11	127405401	127406900	NM_002017	FLI1	chr11	128069022	662871
chr11	127427301	127428700	NM_002017	FLI1	chr11	128069022	641021
chr11	127701501	127702750	NM_002017	FLI1	chr11	128069022	366896
chr11	127896501	127897800	NM_002017	FLI1	chr11	128069022	171871
chr11	128052601	128054000	NM_002017	FLI1	chr11	128069022	15721
chr11	128068351	128069850	NM_016952	CDON	chr11	125438397	2630704
chr11	128132451	128134150	NM_002017	FLI1	chr11	128069022	64279
chr11	128142451	128144150	NM_002017	FLI1	chr11	128069022	74279
chr11	128147151	128148800	NM_002017	FLI1	chr11	128069022	78954
chr11	128156451	128157900	NM_002017	FLI1	chr11	128069022	88154
chr11	128164801	128166150	NM_002017	FLI1	chr11	128069022	96454
chr11	128179701	128181300	NM_002017	FLI1	chr11	128069022	111479
chr11	128181501	128183100	NM_002017	FLI1	chr11	128069022	113279
chr11	128183501	128184950	NM_002017	FLI1	chr11	128069022	115204
chr11	128184801	128186850	NM_002017	FLI1	chr11	128069022	116804
chr11	128279501	128280800	NM_002017	FLI1	chr11	128069022	211129
chr11	128293801	128295350	NM_002017	FLI1	chr11	128069022	225554
chr11	128675851	128677350	NM_002017	FLI1	chr11	128069022	607579
chr11	128749151	128750400	NM_002017	FLI1	chr11	128069022	680754
chr11	128918301	128919750	NM_002017	FLI1	chr11	128069022	850004
chr11	128949001	128950500	NM_002017	FLI1	chr11	128069022	880729
chr11	129075101	129076600	NM_002017	FLI1	chr11	128069022	1006829
chr11	129085101	129086650	NM_002017	FLI1	chr11	128069022	1016854
chr11	129285801	129287200	NM_002017	FLI1	chr11	128069022	1217479
chr11	129378051	129379500	NM_002017	FLI1	chr11	128069022	1309754
chr11	129803151	129804450	NM_002017	FLI1	chr11	128069022	1734779
chr11	129855401	129856750	NM_002017	FLI1	chr11	128069022	1787054
chr11	131107901	131109250	NM_014384	ACAD8	chr11	133628643	2520067
chr11	131134901	131136650	NM_014384	ACAD8	chr11	133628643	2492867
chr11	131190101	131191750	NM_014384	ACAD8	chr11	133628643	2437717
chr11	131262851	131264400	NM_014384	ACAD8	chr11	133628643	2365017
chr11	131274551	131276000	NM_014384	ACAD8	chr11	133628643	2353367
chr11	131279251	131280700	NM_014384	ACAD8	chr11	133628643	2348667
chr11	131332601	131333850	NM_014384	ACAD8	chr11	133628643	2295417
chr11	131350201	131351950	NM_014384	ACAD8	chr11	133628643	2277567
chr11	131372401	131374300	NM_014384	ACAD8	chr11	133628643	2255292
chr11	132048701	132050200	NM_014384	ACAD8	chr11	133628643	1579192
chr11	132368701	132369950	NM_014384	ACAD8	chr11	133628643	1259317
chr11	132374301	132375700	NM_014384	ACAD8	chr11	133628643	1253642
chr11	133361051	133362550	NM_014384	ACAD8	chr11	133628643	266842
chr11	133361701	133362950	NM_014384	ACAD8	chr11	133628643	266317
chr11	133408351	133409800	NM_014384	ACAD8	chr11	133628643	219567
chr11	133411901	133413450	NM_014384	ACAD8	chr11	133628643	215967
chr11	133435201	133436700	NM_014384	ACAD8	chr11	133628643	192692
chr11	133437651	133439000	NM_014384	ACAD8	chr11	133628643	190317
chr11	133598801	133600050	NM_014384	ACAD8	chr11	133628643	29217
chr11	133641051	133642600	NM_014384	ACAD8	chr11	133628643	13183
chr11	133736301	133737550	NM_014384	ACAD8	chr11	133628643	108283
chr11	133761551	133763050	NM_014384	ACAD8	chr11	133628643	133658
chr11	133882401	133883700	NM_014384	ACAD8	chr11	133628643	254408
chr11	133884551	133885800	NM_014384	ACAD8	chr11	133628643	256533
chr11	134176051	134177400	NM_014384	ACAD8	chr11	133628643	548083
chr11	134221951	134223200	NM_014384	ACAD8	chr11	133628643	593933
chr11	134280801	134282050	NM_014384	ACAD8	chr11	133628643	652783
chr11	134362001	134363500	NM_014384	ACAD8	chr11	133628643	734108
chr11	134405251	134406700	NM_014384	ACAD8	chr11	133628643	777333
chr12	231501	232850	NM_001065	TNFRSF1A	chr12	6321522	6089346
chr12	367951	369800	NM_001065	TNFRSF1A	chr12	6321522	5952646
chr12	488351	489850	NM_001065	TNFRSF1A	chr12	6321522	5832421
chr12	517501	518900	NM_001065	TNFRSF1A	chr12	6321522	5803321
chr12	576901	578300	NM_001065	TNFRSF1A	chr12	6321522	5743921
chr12	586451	588100	NM_001065	TNFRSF1A	chr12	6321522	5734246
chr12	697951	699300	NM_001065	TNFRSF1A	chr12	6321522	5622896
chr12	730201	731500	NM_001065	TNFRSF1A	chr12	6321522	5590671
chr12	1191451	1192900	NM_001065	TNFRSF1A	chr12	6321522	5129346
chr12	1502551	1503900	NM_001065	TNFRSF1A	chr12	6321522	4818296
chr12	1554551	1556050	NM_001065	TNFRSF1A	chr12	6321522	4766221
chr12	1598451	1599850	NM_001065	TNFRSF1A	chr12	6321522	4722371
chr12	1669651	1670900	NM_001065	TNFRSF1A	chr12	6321522	4651246
chr12	1830301	1831750	NM_001065	TNFRSF1A	chr12	6321522	4490496
chr12	1903801	1905150	NM_001065	TNFRSF1A	chr12	6321522	4417046
chr12	1983501	1984800	NM_001065	TNFRSF1A	chr12	6321522	4337371
chr12	2014101	2015400	NM_001065	TNFRSF1A	chr12	6321522	4306771
chr12	2073501	2074750	NM_001065	TNFRSF1A	chr12	6321522	4247396
chr12	2133151	2134400	NM_001065	TNFRSF1A	chr12	6321522	4187746
chr12	2147701	2149150	NM_001065	TNFRSF1A	chr12	6321522	4173096
chr12	2151551	2153250	NM_001065	TNFRSF1A	chr12	6321522	4169121
chr12	2262801	2265000	NM_001065	TNFRSF1A	chr12	6321522	4057621
chr12	2271651	2273050	NM_001065	TNFRSF1A	chr12	6321522	4049171
chr12	2303501	2304800	NM_001065	TNFRSF1A	chr12	6321522	4017371
chr12	2304601	2306050	NM_001065	TNFRSF1A	chr12	6321522	4016196
chr12	2312101	2313650	NM_001065	TNFRSF1A	chr12	6321522	4008646
chr12	2313901	2315600	NM_001065	TNFRSF1A	chr12	6321522	4006771
chr12	2458751	2460100	NM_001065	TNFRSF1A	chr12	6321522	3862096
chr12	2465601	2467050	NM_001065	TNFRSF1A	chr12	6321522	3855196
chr12	2480851	2482350	NM_001065	TNFRSF1A	chr12	6321522	3839921
chr12	2517101	2518400	NM_001065	TNFRSF1A	chr12	6321522	3803771
chr12	2520651	2522250	NM_001065	TNFRSF1A	chr12	6321522	3800071
chr12	2530001	2531950	NM_001065	TNFRSF1A	chr12	6321522	3790546
chr12	2532601	2534100	NM_001065	TNFRSF1A	chr12	6321522	3788171
chr12	2604051	2605600	NM_001065	TNFRSF1A	chr12	6321522	3716696
chr12	2791701	2793050	NM_001065	TNFRSF1A	chr12	6321522	3529146
chr12	2937501	2938900	NM_001065	TNFRSF1A	chr12	6321522	3383321
chr12	3011751	3013200	NM_001065	TNFRSF1A	chr12	6321522	3309046
chr12	3029101	3030500	NM_001065	TNFRSF1A	chr12	6321522	3291721
chr12	3033451	3034900	NM_001065	TNFRSF1A	chr12	6321522	3287346
chr12	3076301	3077800	NM_001065	TNFRSF1A	chr12	6321522	3244471
chr12	3084101	3085450	NM_001065	TNFRSF1A	chr12	6321522	3236746
chr12	3095901	3097500	NM_001065	TNFRSF1A	chr12	6321522	3224821
chr12	3116401	3117950	NM_001065	TNFRSF1A	chr12	6321522	3204346
chr12	3118001	3119350	NM_001065	TNFRSF1A	chr12	6321522	3202846
chr12	3129951	3131200	NM_001065	TNFRSF1A	chr12	6321522	3190946
chr12	3158101	3159350	NM_001065	TNFRSF1A	chr12	6321522	3162796
chr12	3197201	3198900	NM_001065	TNFRSF1A	chr12	6321522	3123471
chr12	3204451	3205800	NM_001065	TNFRSF1A	chr12	6321522	3116396
chr12	3228001	3229500	NM_001065	TNFRSF1A	chr12	6321522	3092771
chr12	3584001	3585350	NM_001065	TNFRSF1A	chr12	6321522	2736846
chr12	3907851	3909150	NM_001065	TNFRSF1A	chr12	6321522	2413021
chr12	4113951	4115250	NM_001065	TNFRSF1A	chr12	6321522	2206921
chr12	4248301	4249800	NM_001065	TNFRSF1A	chr12	6321522	2072471
chr12	4249751	4251000	NM_001065	TNFRSF1A	chr12	6321522	2071146
chr12	4393951	4395550	NM_001065	TNFRSF1A	chr12	6321522	1926771
chr12	4416101	4417600	NM_001065	TNFRSF1A	chr12	6321522	1904671
chr12	4420451	4421950	NM_001065	TNFRSF1A	chr12	6321522	1900321
chr12	4517251	4518850	NM_001065	TNFRSF1A	chr12	6321522	1803471
chr12	4888951	4890250	NM_001065	TNFRSF1A	chr12	6321522	1431921
chr12	6053801	6055050	NM_001065	TNFRSF1A	chr12	6321522	267096
chr12	6300851	6302350	NM_001065	TNFRSF1A	chr12	6321522	19921
chr12	6302501	6304250	NM_001065	TNFRSF1A	chr12	6321522	18146
chr12	6315001	6316750	NM_001065	TNFRSF1A	chr12	6321522	5646
chr12	6320851	6322100	NM_201650	LRRC23	chr12	6884157	562681
chr12	6351351	6352850	NM_001065	TNFRSF1A	chr12	6321522	30579
chr12	6402451	6403850	NM_001065	TNFRSF1A	chr12	6321522	81629
chr12	6430401	6431950	NM_001065	TNFRSF1A	chr12	6321522	109654
chr12	6442051	6443600	NM_001065	TNFRSF1A	chr12	6321522	121304
chr12	6472101	6473600	NM_001065	TNFRSF1A	chr12	6321522	151329
chr12	6514001	6515600	NM_001065	TNFRSF1A	chr12	6321522	193279
chr12	6533701	6535200	NM_001065	TNFRSF1A	chr12	6321522	212929
chr12	6611201	6612600	NM_201650	LRRC23	chr12	6884157	272256
chr12	6623101	6624550	NM_201650	LRRC23	chr12	6884157	260331
chr12	6641751	6643500	NM_201650	LRRC23	chr12	6884157	241531
chr12	6667551	6669100	NM_201650	LRRC23	chr12	6884157	215831
chr12	6668151	6669950	NM_201650	LRRC23	chr12	6884157	215106
chr12	6702701	6704200	NM_201650	LRRC23	chr12	6884157	180706
chr12	6870351	6871600	NM_201650	LRRC23	chr12	6884157	13181
chr12	6907601	6908850	NM_201650	LRRC23	chr12	6884157	24069
chr12	6917001	6918250	NM_201650	LRRC23	chr12	6884157	33469
chr12	6922651	6924200	NM_201650	LRRC23	chr12	6884157	39269
chr12	6938001	6939450	NM_201650	LRRC23	chr12	6884157	54569
chr12	6940851	6942300	NM_201650	LRRC23	chr12	6884157	57419
chr12	6949451	6951200	NM_201650	LRRC23	chr12	6884157	66169
chr12	8013851	8015500	NM_006931	SLC2A3	chr12	7980159	34517
chr12	8033251	8034800	NM_006931	SLC2A3	chr12	7980159	53867
chr12	8070151	8071450	NM_004054	C3AR1	chr12	8110222	39421
chr12	8125351	8126600	NM_004054	C3AR1	chr12	8110222	15754
chr12	8740501	8741900	NM_004054	C3AR1	chr12	8110222	630979
chr12	8884201	8885450	NM_004054	C3AR1	chr12	8110222	774604
chr12	8957451	8958700	NM_001781	CD69	chr12	9804764	846688
chr12	8992851	8994250	NM_001781	CD69	chr12	9804764	811213
chr12	9210751	9212100	NM_001781	CD69	chr12	9804764	593338
chr12	9227251	9228700	NM_001781	CD69	chr12	9804764	576788
chr12	9326901	9328150	NM_001781	CD69	chr12	9804764	477238
chr12	9690951	9692500	NM_001781	CD69	chr12	9804764	113038
chr12	9790651	9792050	NM_001781	CD69	chr12	9804764	13413
chr12	10111301	10112750	NM_016511	CLEC1A	chr12	10142872	30846
chr12	10112551	10113900	NM_016511	CLEC1A	chr12	10142872	29646
chr12	10142151	10143600	NM_001781	CD69	chr12	9804764	338112
chr12	10255901	10257150	NM_016511	CLEC1A	chr12	10142872	113654
chr12	10256351	10257600	NM_016511	CLEC1A	chr12	10142872	114104
chr12	10407901	10409250	NM_016511	CLEC1A	chr12	10142872	265704
chr12	10656601	10658200	NM_016511	CLEC1A	chr12	10142872	514529
chr12	10717301	10718800	NM_016511	CLEC1A	chr12	10142872	575179
chr12	10760151	10761450	NM_016511	CLEC1A	chr12	10142872	617929
chr12	10765301	10766950	NM_016511	CLEC1A	chr12	10142872	623254
chr12	11245801	11247250	NM_001987	ETV6	chr12	11694054	447528
chr12	11552951	11554400	NM_001987	ETV6	chr12	11694054	140378
chr12	11589051	11590950	NM_001987	ETV6	chr12	11694054	104053
chr12	11692251	11694150	NM_004064	CDKN1B	chr12	12761568	1068367
chr12	11693751	11695000	NM_004064	CDKN1B	chr12	12761568	1067192
chr12	11763201	11765000	NM_001987	ETV6	chr12	11694054	70047
chr12	11802551	11804300	NM_001987	ETV6	chr12	11694054	109372
chr12	11809651	11811650	NM_001987	ETV6	chr12	11694054	116597
chr12	11842601	11844000	NM_001987	ETV6	chr12	11694054	149247
chr12	11845501	11847000	NM_001987	ETV6	chr12	11694054	152197
chr12	11856401	11858300	NM_001987	ETV6	chr12	11694054	163297
chr12	11899151	11900750	NM_001987	ETV6	chr12	11694054	205897
chr12	11905101	11906350	NM_001987	ETV6	chr12	11694054	211672
chr12	11907851	11909100	NM_001987	ETV6	chr12	11694054	214422
chr12	12008001	12009500	NM_001987	ETV6	chr12	11694054	314697
chr12	12011301	12012900	NM_001987	ETV6	chr12	11694054	318047
chr12	12076501	12078150	NM_001987	ETV6	chr12	11694054	383272
chr12	12293151	12294650	NM_004064	CDKN1B	chr12	12761568	467667
chr12	12371351	12372850	NM_004064	CDKN1B	chr12	12761568	389467
chr12	12446901	12448400	NM_004064	CDKN1B	chr12	12761568	313917
chr12	12487001	12488400	NM_004064	CDKN1B	chr12	12761568	273867
chr12	12525251	12526750	NM_004064	CDKN1B	chr12	12761568	235567
chr12	12550301	12551700	NM_004064	CDKN1B	chr12	12761568	210567
chr12	12655001	12656350	NM_004064	CDKN1B	chr12	12761568	105892
chr12	12655951	12657200	NM_004064	CDKN1B	chr12	12761568	104992
chr12	12708751	12710300	NM_004064	CDKN1B	chr12	12761568	52042
chr12	12728001	12729350	NM_004064	CDKN1B	chr12	12761568	32892
chr12	12749551	12750800	NM_004064	CDKN1B	chr12	12761568	11392
chr12	12760251	12761500	NM_004064	CDKN1B	chr12	12761568	692
chr12	12769051	12770300	NM_004064	CDKN1B	chr12	12761568	8108
chr12	12769651	12771000	NM_004064	CDKN1B	chr12	12761568	8758
chr12	12851951	12853300	NM_030817	APOLD1	chr12	12829807	22819
chr12	12883651	12884900	NM_030817	APOLD1	chr12	12829807	54469
chr12	12947601	12949050	NM_030817	APOLD1	chr12	12829807	118519
chr12	12953851	12955200	NM_030817	APOLD1	chr12	12829807	124719
chr12	12955851	12957300	NM_030817	APOLD1	chr12	12829807	126769
chr12	12960351	12961800	NM_030817	APOLD1	chr12	12829807	131269
chr12	13141651	13143200	NM_030817	APOLD1	chr12	12829807	312619
chr12	13142551	13144050	NM_030817	APOLD1	chr12	12829807	313494
chr12	13144451	13146000	NM_030817	APOLD1	chr12	12829807	315419
chr12	13158551	13159850	NM_030817	APOLD1	chr12	12829807	329394
chr12	13188001	13189450	NM_030817	APOLD1	chr12	12829807	358919
chr12	13189551	13191050	NM_030817	APOLD1	chr12	12829807	360494
chr12	13223051	13224500	NM_030817	APOLD1	chr12	12829807	393969
chr12	13273851	13275200	NM_030817	APOLD1	chr12	12829807	444719
chr12	13299551	13300900	NM_030817	APOLD1	chr12	12829807	470419
chr12	14237301	14238800	NM_030817	APOLD1	chr12	12829807	1408244
chr12	14283751	14285100	NM_030817	APOLD1	chr12	12829807	1454619
chr12	14284201	14285450	NM_030817	APOLD1	chr12	12829807	1455019
chr12	14303551	14305100	NM_030817	APOLD1	chr12	12829807	1474519
chr12	14304151	14305700	NM_030817	APOLD1	chr12	12829807	1475119
chr12	14478651	14480050	NM_007178	STRAP	chr12	15926554	1447203
chr12	14687651	14689250	NM_007178	STRAP	chr12	15926554	1238103
chr12	14813701	14815950	NM_007178	STRAP	chr12	15926554	1111728
chr12	14819001	14820250	NM_007178	STRAP	chr12	15926554	1106928
chr12	14958101	14959450	NM_007178	STRAP	chr12	15926554	967778
chr12	15004551	15006550	NM_007178	STRAP	chr12	15926554	921003
chr12	15314251	15315700	NM_007178	STRAP	chr12	15926554	611578
chr12	15322551	15324450	NM_007178	STRAP	chr12	15926554	603053
chr12	15440401	15441650	NM_007178	STRAP	chr12	15926554	485528
chr12	15649851	15651300	NM_007178	STRAP	chr12	15926554	275978
chr12	15925901	15927300	NM_015954	DERA	chr12	15955452	28851
chr12	16113451	16115100	NM_015954	DERA	chr12	15955452	158824
chr12	16219901	16221150	NM_015954	DERA	chr12	15955452	265074
chr12	16392501	16393950	NM_015954	DERA	chr12	15955452	437774
chr12	16649351	16650900	NM_015954	DERA	chr12	15955452	694674
chr12	16650201	16651550	NM_015954	DERA	chr12	15955452	695424
chr12	16769901	16771300	NM_015954	DERA	chr12	15955452	815149
chr12	16822201	16823700	NM_015954	DERA	chr12	15955452	867499
chr12	16937151	16938500	NM_015954	DERA	chr12	15955452	982374
chr12	17063851	17065250	NM_015954	DERA	chr12	15955452	1109099
chr12	17141251	17142550	NM_015954	DERA	chr12	15955452	1186449
chr12	17415201	17416750	NM_015954	DERA	chr12	15955452	1460524
chr12	17993401	17994750	NM_015954	DERA	chr12	15955452	2038624
chr12	18138951	18140300	NM_015954	DERA	chr12	15955452	2184174
chr12	18400501	18401850	NM_000921	PDE3A	chr12	20413463	2012287
chr12	18434901	18436300	NM_000921	PDE3A	chr12	20413463	1977862
chr12	18796151	18797500	NM_000921	PDE3A	chr12	20413463	1616637
chr12	18891301	18892600	NM_000921	PDE3A	chr12	20413463	1521512
chr12	19172951	19174200	NM_000921	PDE3A	chr12	20413463	1239887
chr12	19436701	19438150	NM_000921	PDE3A	chr12	20413463	976037
chr12	19619351	19620950	NM_000921	PDE3A	chr12	20413463	793312
chr12	19632301	19633550	NM_000921	PDE3A	chr12	20413463	780537
chr12	20067901	20069350	NM_000921	PDE3A	chr12	20413463	344837
chr12	21481051	21482850	NM_000921	PDE3A	chr12	20413463	1068488
chr12	21544851	21546650	NM_000921	PDE3A	chr12	20413463	1132288
chr12	21701001	21702250	NM_000921	PDE3A	chr12	20413463	1288163
chr12	21984801	21986350	NM_000921	PDE3A	chr12	20413463	1572113
chr12	22145601	22147050	NM_000921	PDE3A	chr12	20413463	1732863
chr12	22204001	22205350	NM_000921	PDE3A	chr12	20413463	1791213
chr12	22218851	22220150	NM_000921	PDE3A	chr12	20413463	1806038
chr12	22588001	22589350	NM_000921	PDE3A	chr12	20413463	2175213
chr12	22669301	22670900	NM_000921	PDE3A	chr12	20413463	2256638
chr12	22960451	22961750	NM_006152	LRMP	chr12	25096507	2135406
chr12	22978651	22980200	NM_006152	LRMP	chr12	25096507	2117081
chr12	23574401	23575650	NM_006152	LRMP	chr12	25096507	1521481
chr12	23949951	23951450	NM_006152	LRMP	chr12	25096507	1145806
chr12	24089551	24090950	NM_006152	LRMP	chr12	25096507	1006256
chr12	24241101	24242650	NM_006152	LRMP	chr12	25096507	854631
chr12	24351001	24352650	NM_006152	LRMP	chr12	25096507	744681
chr12	24383351	24384800	NM_006152	LRMP	chr12	25096507	712431
chr12	24385301	24386700	NM_006152	LRMP	chr12	25096507	710506
chr12	24784201	24785450	NM_006152	LRMP	chr12	25096507	311681
chr12	24809851	24811300	NM_006152	LRMP	chr12	25096507	285931
chr12	24867751	24869150	NM_006152	LRMP	chr12	25096507	228056
chr12	24895701	24897100	NM_006152	LRMP	chr12	25096507	200106
chr12	24992001	24993500	NM_006152	LRMP	chr12	25096507	103756
chr12	25238951	25240400	NM_006152	LRMP	chr12	25096507	143169
chr12	25429101	25430800	NM_006152	LRMP	chr12	25096507	333444
chr12	25692251	25693700	NM_006152	LRMP	chr12	25096507	596469
chr12	25697451	25698950	NM_006152	LRMP	chr12	25096507	601694
chr12	25733751	25735150	NM_006152	LRMP	chr12	25096507	637944
chr12	25819501	25821050	NM_006152	LRMP	chr12	25096507	723769
chr12	25828851	25830250	NM_006152	LRMP	chr12	25096507	733044
chr12	25873851	25875100	NM_006152	LRMP	chr12	25096507	777969
chr12	25968101	25969750	NM_006152	LRMP	chr12	25096507	872419
chr12	25984301	25985650	NM_006152	LRMP	chr12	25096507	888469
chr12	26158301	26159750	NM_006152	LRMP	chr12	25096507	1062519
chr12	26281201	26282600	NM_006152	LRMP	chr12	25096507	1185394
chr12	26496151	26497700	NM_003622	PPFIBP1	chr12	27568311	1071385
chr12	26563801	26565350	NM_003622	PPFIBP1	chr12	27568311	1003735
chr12	26661251	26662750	NM_003622	PPFIBP1	chr12	27568311	906310
chr12	26784651	26786050	NM_003622	PPFIBP1	chr12	27568311	782960
chr12	26875551	26876800	NM_003622	PPFIBP1	chr12	27568311	692135
chr12	26875851	26877200	NM_003622	PPFIBP1	chr12	27568311	691785
chr12	26981701	26983100	NM_003622	PPFIBP1	chr12	27568311	585910
chr12	26982551	26983850	NM_003622	PPFIBP1	chr12	27568311	585110
chr12	27044401	27045900	NM_003622	PPFIBP1	chr12	27568311	523160
chr12	27057351	27058900	NM_003622	PPFIBP1	chr12	27568311	510185
chr12	27058201	27059500	NM_003622	PPFIBP1	chr12	27568311	509460
chr12	27287501	27288800	NM_003622	PPFIBP1	chr12	27568311	280160
chr12	27445801	27447050	NM_003622	PPFIBP1	chr12	27568311	121885
chr12	27463601	27464900	NM_003622	PPFIBP1	chr12	27568311	104060
chr12	27564801	27566200	NM_003622	PPFIBP1	chr12	27568311	2810
chr12	27567901	27569250	NM_198965	PTHLH	chr12	28016183	447607
chr12	27608551	27609850	NM_003622	PPFIBP1	chr12	27568311	40890
chr12	27754101	27755400	NM_003622	PPFIBP1	chr12	27568311	186440
chr12	28133351	28134600	NM_198965	PTHLH	chr12	28016183	117793
chr12	28174351	28175800	NM_198965	PTHLH	chr12	28016183	158893
chr12	28221601	28222850	NM_198965	PTHLH	chr12	28016183	206043
chr12	28234551	28235850	NM_198965	PTHLH	chr12	28016183	219018
chr12	28395051	28396650	NM_198965	PTHLH	chr12	28016183	379668
[truncated: 16,959 more rows]

## Sheet: HUVEC_EWS-FLI
Peak_chr	Peak_start	Peak_stop	Nearest_DifferentiallyExpressed_RefSeqID	Nearest_DifferentiallyExpressed_GeneSymbol	Nearest_DifferentiallyExpressed_RefSeq_chr	Nearest_DifferentiallyExpressed_RefSeq_TSS	Distance_PeakMidpoint_TSS_bp
chr10	90732910	90733373	NM_000043	FAS	chr10	90740267	7125
chr10	90736264	90736657	NM_000043	FAS	chr10	90740267	3806
chr10	90740783	90741181	NM_000043	FAS	chr10	90740267	715
chr10	90781297	90782422	NM_000043	FAS	chr10	90740267	41593
chrX	2745009	2745395	NM_000047	ARSE	chrX	2892494	147292
chrX	3071031	3071378	NM_000047	ARSE	chrX	2892494	178711
chrX	3199929	3200330	NM_000047	ARSE	chrX	2892494	307636
chrX	3474743	3475280	NM_000047	ARSE	chrX	2892494	582518
chrX	3649952	3650337	NM_000047	ARSE	chrX	2892494	757651
chr16	55731307	55731707	NM_000078	CETP	chr16	55553335	178172
chr16	55739002	55739407	NM_000078	CETP	chr16	55553335	185870
chr2	179727131	179727445	NM_000090	COL3A1	chr2	189547343	9820055
chr2	180984503	180985065	NM_000090	COL3A1	chr2	189547343	8562559
chr2	181045514	181045882	NM_000090	COL3A1	chr2	189547343	8501645
chr2	181132818	181133203	NM_000090	COL3A1	chr2	189547343	8414332
chr2	182029490	182029952	NM_000090	COL3A1	chr2	189547343	7517622
chr2	182222956	182223368	NM_000090	COL3A1	chr2	189547343	7324181
chr2	182258371	182258748	NM_000090	COL3A1	chr2	189547343	7288783
chr2	182352317	182352953	NM_000090	COL3A1	chr2	189547343	7194708
chr2	182383764	182384151	NM_000090	COL3A1	chr2	189547343	7163385
chr2	182465587	182465969	NM_000090	COL3A1	chr2	189547343	7081565
chr2	182619031	182619252	NM_000090	COL3A1	chr2	189547343	6928201
chr2	182755493	182755857	NM_000090	COL3A1	chr2	189547343	6791668
chr2	182853099	182853494	NM_000090	COL3A1	chr2	189547343	6694046
chr2	182931746	182932160	NM_000090	COL3A1	chr2	189547343	6615390
chr2	182945575	182946022	NM_000090	COL3A1	chr2	189547343	6601544
chr2	183079471	183079902	NM_000090	COL3A1	chr2	189547343	6467656
chr2	183150819	183151160	NM_000090	COL3A1	chr2	189547343	6396353
chr2	183162075	183162448	NM_000090	COL3A1	chr2	189547343	6385081
chr2	183189670	183190090	NM_000090	COL3A1	chr2	189547343	6357463
chr2	183485646	183486018	NM_000090	COL3A1	chr2	189547343	6061511
chr2	183582206	183582567	NM_000090	COL3A1	chr2	189547343	5964956
chr2	186702627	186703070	NM_000090	COL3A1	chr2	189547343	2844494
chr2	186931621	186931993	NM_000090	COL3A1	chr2	189547343	2615536
chr2	187321243	187321822	NM_000090	COL3A1	chr2	189547343	2225810
chr2	187457594	187457997	NM_000090	COL3A1	chr2	189547343	2089547
chr2	187709630	187709841	NM_000090	COL3A1	chr2	189547343	1837607
chr2	187778875	187779527	NM_000090	COL3A1	chr2	189547343	1768142
chr2	187805786	187806124	NM_000090	COL3A1	chr2	189547343	1741388
chr2	187830984	187831532	NM_000090	COL3A1	chr2	189547343	1716085
chr2	187836850	187837666	NM_000090	COL3A1	chr2	189547343	1710085
chr2	188054251	188054884	NM_000090	COL3A1	chr2	189547343	1492775
chr2	188077545	188077918	NM_000090	COL3A1	chr2	189547343	1469611
chr2	188100236	188100550	NM_000090	COL3A1	chr2	189547343	1446950
chr2	188114641	188115046	NM_000090	COL3A1	chr2	189547343	1432499
chr2	188127262	188127667	NM_000090	COL3A1	chr2	189547343	1419878
chr2	188535641	188536042	NM_000090	COL3A1	chr2	189547343	1011501
chr2	188565002	188565249	NM_000090	COL3A1	chr2	189547343	982217
chr2	189238760	189239163	NM_000090	COL3A1	chr2	189547343	308381
chr2	189302914	189303415	NM_000090	COL3A1	chr2	189547343	244178
chr2	189575040	189575414	NM_000090	COL3A1	chr2	189547343	27884
chr2	190132523	190132744	NM_000090	COL3A1	chr2	189547343	585291
chr2	190907434	190907848	NM_000090	COL3A1	chr2	189547343	1360298
chr2	190913291	190913673	NM_000090	COL3A1	chr2	189547343	1366139
chr2	190916202	190916665	NM_000090	COL3A1	chr2	189547343	1369091
chr2	191251325	191251792	NM_000090	COL3A1	chr2	189547343	1704216
chr2	191255144	191255526	NM_000090	COL3A1	chr2	189547343	1707992
chr2	191362501	191362947	NM_000090	COL3A1	chr2	189547343	1815381
chr2	191364568	191364948	NM_000090	COL3A1	chr2	189547343	1817415
chr2	191454780	191455256	NM_000090	COL3A1	chr2	189547343	1907675
chr2	191543862	191544406	NM_000090	COL3A1	chr2	189547343	1996791
chr2	191551262	191551716	NM_000090	COL3A1	chr2	189547343	2004146
chr2	191553274	191553608	NM_000090	COL3A1	chr2	189547343	2006098
chr2	191593167	191593550	NM_000090	COL3A1	chr2	189547343	2046016
chr2	191894827	191895641	NM_000090	COL3A1	chr2	189547343	2347891
chr2	191950223	191950596	NM_000090	COL3A1	chr2	189547343	2403067
chr2	191958836	191959325	NM_000090	COL3A1	chr2	189547343	2411738
chr2	192026054	192026846	NM_000090	COL3A1	chr2	189547343	2479107
chr2	192038695	192039083	NM_000090	COL3A1	chr2	189547343	2491546
chr2	192052239	192052648	NM_000090	COL3A1	chr2	189547343	2505101
chr2	192142783	192143226	NM_000090	COL3A1	chr2	189547343	2595662
chr2	192238176	192238631	NM_000090	COL3A1	chr2	189547343	2691061
chr2	192409802	192410154	NM_000090	COL3A1	chr2	189547343	2862635
chr2	192480615	192480987	NM_000090	COL3A1	chr2	189547343	2933458
chr2	192502395	192502673	NM_000090	COL3A1	chr2	189547343	2955191
chr2	192851211	192851580	NM_000090	COL3A1	chr2	189547343	3304053
chr2	192884373	192884872	NM_000090	COL3A1	chr2	189547343	3337280
chr2	193302255	193302624	NM_000090	COL3A1	chr2	189547343	3755097
chr2	193852456	193852843	NM_000090	COL3A1	chr2	189547343	4305307
chr2	196806030	196806414	NM_000090	COL3A1	chr2	189547343	7258879
chr2	196813160	196813530	NM_000090	COL3A1	chr2	189547343	7266002
chr2	196935050	196935369	NM_000090	COL3A1	chr2	189547343	7387867
chr2	197007160	197007546	NM_000090	COL3A1	chr2	189547343	7460010
chr2	197644850	197645236	NM_000090	COL3A1	chr2	189547343	8097700
chr2	197710784	197711190	NM_000090	COL3A1	chr2	189547343	8163644
chr2	198278754	198279152	NM_000090	COL3A1	chr2	189547343	8731610
chr2	198477417	198477797	NM_000090	COL3A1	chr2	189547343	8930264
chr2	198482274	198482704	NM_000090	COL3A1	chr2	189547343	8935146
chr2	198502268	198502627	NM_000090	COL3A1	chr2	189547343	8955105
chr2	200004567	200005444	NM_000090	COL3A1	chr2	189547343	10457663
chr2	200940145	200940522	NM_000090	COL3A1	chr2	189547343	11392991
chr2	200949455	200949836	NM_000090	COL3A1	chr2	189547343	11402303
chr2	200979016	200979327	NM_000090	COL3A1	chr2	189547343	11431829
chr2	201203359	201203725	NM_000090	COL3A1	chr2	189547343	11656199
chr2	201246557	201246979	NM_000090	COL3A1	chr2	189547343	11699425
chr2	201286045	201286461	NM_000090	COL3A1	chr2	189547343	11738910
chr2	201462118	201462525	NM_000090	COL3A1	chr2	189547343	11914979
chr2	201689532	201689957	NM_000090	COL3A1	chr2	189547343	12142402
chr2	201691199	201691608	NM_000090	COL3A1	chr2	189547343	12144061
chr2	201703747	201704140	NM_000090	COL3A1	chr2	189547343	12156601
chr2	201764301	201764882	NM_000090	COL3A1	chr2	189547343	12217249
chr2	202269028	202269687	NM_000090	COL3A1	chr2	189547343	12722015
chr2	202410391	202410624	NM_000090	COL3A1	chr2	189547343	12863165
chr14	52382816	52383266	NM_000161	GCH1	chr14	54439292	2056251
chr14	53039119	53039495	NM_000161	GCH1	chr14	54439292	1399985
chr14	53086424	53086798	NM_000161	GCH1	chr14	54439292	1352681
chr14	53273832	53274184	NM_000161	GCH1	chr14	54439292	1165284
chr14	53392395	53392788	NM_000161	GCH1	chr14	54439292	1046700
chr14	53427206	53427356	NM_000161	GCH1	chr14	54439292	1012011
chr14	53436660	53436837	NM_000161	GCH1	chr14	54439292	1002543
chr14	53683782	53684199	NM_000161	GCH1	chr14	54439292	755301
chr14	53703120	53703535	NM_000161	GCH1	chr14	54439292	735964
chr14	53705951	53706169	NM_000161	GCH1	chr14	54439292	733232
chr14	53716452	53716747	NM_000161	GCH1	chr14	54439292	722692
chr14	53846709	53847047	NM_000161	GCH1	chr14	54439292	592414
chr14	53848652	53849041	NM_000161	GCH1	chr14	54439292	590445
chr14	53867275	53867687	NM_000161	GCH1	chr14	54439292	571811
chr14	53901292	53901766	NM_000161	GCH1	chr14	54439292	537763
chr14	54174253	54175073	NM_000161	GCH1	chr14	54439292	264629
chr14	54190540	54190929	NM_000161	GCH1	chr14	54439292	248557
chr14	54199185	54199578	NM_000161	GCH1	chr14	54439292	239910
chr14	54260297	54260686	NM_000161	GCH1	chr14	54439292	178800
chr14	54281619	54281954	NM_000161	GCH1	chr14	54439292	157505
chr14	54293160	54293363	NM_000161	GCH1	chr14	54439292	146030
chr14	54309266	54310174	NM_000161	GCH1	chr14	54439292	129572
chr14	54587731	54588127	NM_000161	GCH1	chr14	54439292	148637
chr14	54954879	54955243	NM_000161	GCH1	chr14	54439292	515769
chr14	54984501	54984894	NM_000161	GCH1	chr14	54439292	545406
chr14	54987873	54988225	NM_000161	GCH1	chr14	54439292	548757
chr14	55257783	55258178	NM_000161	GCH1	chr14	54439292	818689
chr10	99828524	99828880	NM_000195	HPS1	chr10	100196694	367992
chr10	100066443	100066792	NM_000195	HPS1	chr10	100196694	130076
chr10	100083272	100083670	NM_000195	HPS1	chr10	100196694	113223
chr10	100094207	100094502	NM_000195	HPS1	chr10	100196694	102339
chr10	100099251	100099619	NM_000195	HPS1	chr10	100196694	97259
chr10	100102795	100103229	NM_000195	HPS1	chr10	100196694	93682
chr10	100135959	100136270	NM_000195	HPS1	chr10	100196694	60579
chr10	100278088	100278676	NM_000195	HPS1	chr10	100196694	81688
chr10	101217286	101217672	NM_000195	HPS1	chr10	100196694	1020785
chr10	101221196	101221305	NM_000195	HPS1	chr10	100196694	1024557
chrX	8155158	8155382	NM_000216	KAL1	chrX	8660227	504957
chrX	8473248	8473645	NM_000216	KAL1	chrX	8660227	186780
chrX	9091257	9092007	NM_000216	KAL1	chrX	8660227	431405
chrX	9213360	9213749	NM_000216	KAL1	chrX	8660227	553328
chrX	9246190	9246590	NM_000216	KAL1	chrX	8660227	586163
chr18	19503180	19503535	NM_000271	NPC1	chr18	19420579	82779
chrX	7011947	7012545	NM_000351	STS	chrX	7147471	135225
chrX	7037305	7037621	NM_000351	STS	chrX	7147471	110008
chrX	7050430	7050885	NM_000351	STS	chrX	7147471	96813
chrX	7139848	7140202	NM_000351	STS	chrX	7147471	7446
chr10	127228909	127229452	NM_000375	UROS	chr10	127501827	272646
chr10	127233425	127233861	NM_000375	UROS	chr10	127501827	268184
chr10	127285003	127285384	NM_000375	UROS	chr10	127501827	216633
chr10	127305286	127305686	NM_000375	UROS	chr10	127501827	196341
chr10	127306932	127307284	NM_000375	UROS	chr10	127501827	194719
chr10	127363134	127363574	NM_000375	UROS	chr10	127501827	138473
chr10	127571006	127571369	NM_000375	UROS	chr10	127501827	69361
chr10	127728396	127728786	NM_000375	UROS	chr10	127501827	226764
chr10	127739115	127739523	NM_000375	UROS	chr10	127501827	237492
chr10	127915084	127915308	NM_000375	UROS	chr10	127501827	413369
chr10	128660785	128661337	NM_000375	UROS	chr10	127501827	1159234
chr10	128665441	128666010	NM_000375	UROS	chr10	127501827	1163899
chr10	128770033	128770689	NM_000375	UROS	chr10	127501827	1268534
chr10	128813785	128813992	NM_000375	UROS	chr10	127501827	1312062
chr10	128942549	128942938	NM_000375	UROS	chr10	127501827	1440917
chr10	128958581	128958971	NM_000375	UROS	chr10	127501827	1456949
chr10	129568714	129569238	NM_000375	UROS	chr10	127501827	2067149
chr10	129577907	129578332	NM_000375	UROS	chr10	127501827	2076293
chr10	129607553	129608165	NM_000375	UROS	chr10	127501827	2106032
chr10	129665842	129666213	NM_000375	UROS	chr10	127501827	2164201
chr10	129667275	129667642	NM_000375	UROS	chr10	127501827	2165632
chr10	129751261	129751645	NM_000375	UROS	chr10	127501827	2249626
chr10	129896672	129897054	NM_000375	UROS	chr10	127501827	2395036
chr10	129909490	129909803	NM_000375	UROS	chr10	127501827	2407820
chr11	6008148	6008535	NM_000391	TPP1	chr11	6597268	588926
chr11	6356064	6356296	NM_000391	TPP1	chr11	6597268	241088
chr11	6362992	6363443	NM_000391	TPP1	chr11	6597268	234050
chr11	6595203	6595601	NM_000391	TPP1	chr11	6597268	1866
chr11	6613433	6613645	NM_000391	TPP1	chr11	6597268	16271
chr11	6706319	6706710	NM_000391	TPP1	chr11	6597268	109247
chr11	36354009	36354339	NM_000401	EXT2	chr11	44073674	7719500
chr11	40307339	40307728	NM_000401	EXT2	chr11	44073674	3766140
chr11	40330130	40330475	NM_000401	EXT2	chr11	44073674	3743371
chr11	41830311	41830679	NM_000401	EXT2	chr11	44073674	2243179
chr11	42289664	42290048	NM_000401	EXT2	chr11	44073674	1783818
chr11	42511199	42511584	NM_000401	EXT2	chr11	44073674	1562282
chr11	43876741	43876998	NM_000401	EXT2	chr11	44073674	196804
chr11	43908967	43909375	NM_000401	EXT2	chr11	44073674	164503
chr11	44052565	44052941	NM_000401	EXT2	chr11	44073674	20921
chr11	44068736	44069079	NM_000401	EXT2	chr11	44073674	4766
chr11	44164943	44165222	NM_000401	EXT2	chr11	44073674	91409
chr11	44247803	44248191	NM_000401	EXT2	chr11	44073674	174323
chr11	44271121	44271497	NM_000401	EXT2	chr11	44073674	197635
chr11	44300965	44301475	NM_000401	EXT2	chr11	44073674	227546
chr2	202677992	202678684	NM_000465	BARD1	chr2	215382673	12704335
chr2	202890410	202890721	NM_000465	BARD1	chr2	215382673	12492107
chr2	202908699	202909163	NM_000465	BARD1	chr2	215382673	12473742
chr2	202981570	202981943	NM_000465	BARD1	chr2	215382673	12400916
chr2	203476298	203476663	NM_000465	BARD1	chr2	215382673	11906192
chr2	204121885	204122257	NM_000465	BARD1	chr2	215382673	11260602
chr2	204156698	204157155	NM_000465	BARD1	chr2	215382673	11225746
chr2	204210413	204210826	NM_000465	BARD1	chr2	215382673	11172053
chr2	204264952	204265714	NM_000465	BARD1	chr2	215382673	11117340
chr2	204319449	204319705	NM_000465	BARD1	chr2	215382673	11063096
chr2	204377713	204378121	NM_000465	BARD1	chr2	215382673	11004756
chr2	204384466	204384902	NM_000465	BARD1	chr2	215382673	10997989
chr2	204425603	204426010	NM_000465	BARD1	chr2	215382673	10956866
chr2	204482247	204482640	NM_000465	BARD1	chr2	215382673	10900229
chr2	204683241	204683613	NM_000465	BARD1	chr2	215382673	10699246
chr2	204687166	204687809	NM_000465	BARD1	chr2	215382673	10695185
chr2	204750181	204750618	NM_000465	BARD1	chr2	215382673	10632273
chr2	204894957	204895364	NM_000465	BARD1	chr2	215382673	10487512
chr2	205111968	205112338	NM_000465	BARD1	chr2	215382673	10270520
chr2	205472059	205472441	NM_000465	BARD1	chr2	215382673	9910423
chr2	205712911	205713310	NM_000465	BARD1	chr2	215382673	9669562
chr2	205742465	205742857	NM_000465	BARD1	chr2	215382673	9640012
chr2	205893036	205893412	NM_000465	BARD1	chr2	215382673	9489449
chr2	205963868	205964301	NM_000465	BARD1	chr2	215382673	9418588
chr2	206163697	206164157	NM_000465	BARD1	chr2	215382673	9218746
chr2	206387131	206387570	NM_000465	BARD1	chr2	215382673	8995322
chr2	206462624	206462982	NM_000465	BARD1	chr2	215382673	8919870
chr2	206498303	206498617	NM_000465	BARD1	chr2	215382673	8884213
chr2	206503137	206503544	NM_000465	BARD1	chr2	215382673	8879332
chr2	206537345	206537750	NM_000465	BARD1	chr2	215382673	8845125
chr2	206997104	206997500	NM_000465	BARD1	chr2	215382673	8385371
chr2	207637208	207637645	NM_000465	BARD1	chr2	215382673	7745246
chr2	207640516	207640899	NM_000465	BARD1	chr2	215382673	7741965
chr2	207647089	207647741	NM_000465	BARD1	chr2	215382673	7735258
chr2	207648410	207648780	NM_000465	BARD1	chr2	215382673	7734078
chr2	207694792	207695171	NM_000465	BARD1	chr2	215382673	7687691
chr2	207799212	207799586	NM_000465	BARD1	chr2	215382673	7583274
chr2	207812084	207812468	NM_000465	BARD1	chr2	215382673	7570397
chr2	207907614	207908275	NM_000465	BARD1	chr2	215382673	7474728
chr2	208533088	208533479	NM_000465	BARD1	chr2	215382673	6849389
chr2	208666722	208667113	NM_000465	BARD1	chr2	215382673	6715755
chr2	208668736	208669388	NM_000465	BARD1	chr2	215382673	6713611
chr2	212625475	212625828	NM_000465	BARD1	chr2	215382673	2757021
chr2	212683263	212683621	NM_000465	BARD1	chr2	215382673	2699231
chr2	213475593	213475965	NM_000465	BARD1	chr2	215382673	1906894
chr2	214698782	214699690	NM_000465	BARD1	chr2	215382673	683437
chr2	215996187	215996700	NM_000465	BARD1	chr2	215382673	613771
chr2	216067210	216067638	NM_000465	BARD1	chr2	215382673	684751
chr2	216101537	216101902	NM_000465	BARD1	chr2	215382673	719047
chr2	216110844	216111063	NM_000465	BARD1	chr2	215382673	728281
chr2	216191969	216192506	NM_000465	BARD1	chr2	215382673	809565
chr2	216224345	216224678	NM_000465	BARD1	chr2	215382673	841839
chr2	216284338	216284893	NM_000465	BARD1	chr2	215382673	901943
chr2	216290654	216291414	NM_000465	BARD1	chr2	215382673	908361
chr2	216291998	216292309	NM_000465	BARD1	chr2	215382673	909481
chr2	216299023	216299398	NM_000465	BARD1	chr2	215382673	916538
chr2	216301430	216301816	NM_000465	BARD1	chr2	215382673	918950
chr2	216313457	216314194	NM_000465	BARD1	chr2	215382673	931153
chr2	216420796	216421178	NM_000599	IGFBP5	chr2	217268517	847530
chr2	216422836	216423195	NM_000599	IGFBP5	chr2	217268517	845501
chr2	216598538	216598957	NM_000599	IGFBP5	chr2	217268517	669769
chr2	216647285	216647656	NM_000599	IGFBP5	chr2	217268517	621046
chr2	216790540	216790873	NM_000599	IGFBP5	chr2	217268517	477810
chr2	216794706	216795259	NM_000599	IGFBP5	chr2	217268517	473534
chr2	217059599	217060220	NM_000599	IGFBP5	chr2	217268517	208607
chr2	217108383	217108976	NM_000599	IGFBP5	chr2	217268517	159837
chr2	217118465	217118870	NM_000599	IGFBP5	chr2	217268517	149849
chr2	217153472	217153840	NM_000599	IGFBP5	chr2	217268517	114861
chr2	217169115	217169742	NM_000599	IGFBP5	chr2	217268517	99088
chr2	217237547	217237958	NM_000599	IGFBP5	chr2	217268517	30764
chr2	217326096	217326458	NM_000599	IGFBP5	chr2	217268517	57760
chr2	217344279	217344710	NM_000599	IGFBP5	chr2	217268517	75978
chr2	217377175	217377661	NM_000599	IGFBP5	chr2	217268517	108901
chr2	217431210	217431643	NM_000599	IGFBP5	chr2	217268517	162910
chr2	217491054	217491461	NM_000599	IGFBP5	chr2	217268517	222741
chr2	217515530	217515956	NM_000599	IGFBP5	chr2	217268517	247226
chr2	217637142	217637582	NM_000599	IGFBP5	chr2	217268517	368845
chr2	217679019	217679462	NM_000599	IGFBP5	chr2	217268517	410724
chr2	217693425	217693853	NM_000599	IGFBP5	chr2	217268517	425122
chr2	217734288	217734761	NM_000599	IGFBP5	chr2	217268517	466008
chr2	217755754	217756146	NM_000599	IGFBP5	chr2	217268517	487433
chr2	217796487	217796853	NM_000599	IGFBP5	chr2	217268517	528153
chr2	217834383	217834757	NM_000599	IGFBP5	chr2	217268517	566053
chr2	217850552	217851022	NM_000599	IGFBP5	chr2	217268517	582270
chr2	217933781	217934144	NM_000599	IGFBP5	chr2	217268517	665446
chr2	217971878	217972105	NM_000599	IGFBP5	chr2	217268517	703475
chr7	22128231	22128611	NM_000600	IL6	chr7	22733290	604869
chr7	22220096	22220473	NM_000600	IL6	chr7	22733290	513005
chr7	22440121	22440545	NM_000600	IL6	chr7	22733290	292957
chr7	22449564	22449957	NM_000600	IL6	chr7	22733290	283529
chr7	22451652	22451989	NM_000600	IL6	chr7	22733290	281469
chr7	22567387	22568055	NM_000600	IL6	chr7	22733290	165569
chr7	22570854	22571243	NM_000600	IL6	chr7	22733290	162241
chr7	22583739	22584123	NM_000600	IL6	chr7	22733290	149359
chr7	22595951	22596366	NM_000600	IL6	chr7	22733290	137131
chr7	22682057	22682421	NM_000600	IL6	chr7	22733290	51051
chr7	23024943	23025329	NM_000600	IL6	chr7	22733290	291846
chr7	23889679	23890024	NM_000600	IL6	chr7	22733290	1156562
chr7	23906684	23907169	NM_000600	IL6	chr7	22733290	1173637
chr7	24463925	24464293	NM_000600	IL6	chr7	22733290	1730819
chr7	24735416	24735846	NM_000600	IL6	chr7	22733290	2002341
chr7	24780099	24780674	NM_000600	IL6	chr7	22733290	2047097
chr7	24897457	24897900	NM_000600	IL6	chr7	22733290	2164389
chr7	25384115	25384487	NM_000600	IL6	chr7	22733290	2651011
chr7	25545231	25545950	NM_000600	IL6	chr7	22733290	2812301
chr7	25833029	25833415	NM_000600	IL6	chr7	22733290	3099932
chr7	25850240	25850628	NM_000600	IL6	chr7	22733290	3117144
chr7	25865940	25866305	NM_000600	IL6	chr7	22733290	3132833
chr7	25901472	25901891	NM_000600	IL6	chr7	22733290	3168392
chr7	26376124	26376496	NM_000600	IL6	chr7	22733290	3643020
chr7	26424065	26424437	NM_000600	IL6	chr7	22733290	3690961
chr7	26463888	26464268	NM_000600	IL6	chr7	22733290	3730788
chr7	26555695	26556121	NM_000600	IL6	chr7	22733290	3822618
chr7	26681235	26681626	NM_000600	IL6	chr7	22733290	3948141
chr7	26689512	26689886	NM_000600	IL6	chr7	22733290	3956409
chr7	26695095	26695390	NM_000600	IL6	chr7	22733290	3961953
chr7	26697603	26697986	NM_000600	IL6	chr7	22733290	3964505
chr7	26947549	26947888	NM_000600	IL6	chr7	22733290	4214429
chr7	27117439	27117780	NM_000600	IL6	chr7	22733290	4384320
chr7	27119459	27119742	NM_000600	IL6	chr7	22733290	4386311
chr7	27173249	27173664	NM_000600	IL6	chr7	22733290	4440167
chr7	27177374	27177906	NM_000600	IL6	chr7	22733290	4444350
chr7	27236704	27237004	NM_000600	IL6	chr7	22733290	4503564
chr7	27306464	27307033	NM_000600	IL6	chr7	22733290	4573459
chr7	27378842	27379053	NM_000600	IL6	chr7	22733290	4645658
chr7	27424750	27425112	NM_000600	IL6	chr7	22733290	4691641
chr7	27880113	27880801	NM_000600	IL6	chr7	22733290	5147167
chr7	28004001	28004372	NM_000600	IL6	chr7	22733290	5270897
chr7	28087168	28087594	NM_000600	IL6	chr7	22733290	5354091
chr7	28239872	28240165	NM_000600	IL6	chr7	22733290	5506729
chr7	28536431	28536844	NM_000600	IL6	chr7	22733290	5803348
chr7	28611638	28612012	NM_000600	IL6	chr7	22733290	5878535
chr7	28638262	28638660	NM_000600	IL6	chr7	22733290	5905171
chr7	28680365	28680783	NM_000600	IL6	chr7	22733290	5947284
chr7	28700445	28700795	NM_000600	IL6	chr7	22733290	5967330
chr7	28705071	28705462	NM_000600	IL6	chr7	22733290	5971977
chr7	28724596	28725024	NM_000600	IL6	chr7	22733290	5991520
chr7	28847713	28848109	NM_000600	IL6	chr7	22733290	6114621
chr7	29041458	29041763	NM_000600	IL6	chr7	22733290	6308321
chr7	29184376	29184754	NM_000600	IL6	chr7	22733290	6451275
chr7	29190472	29190841	NM_000600	IL6	chr7	22733290	6457367
chr7	29271264	29271654	NM_000600	IL6	chr7	22733290	6538169
chr7	29310859	29311362	NM_000600	IL6	chr7	22733290	6577821
chr7	29343786	29344206	NM_000600	IL6	chr7	22733290	6610706
chr7	29380871	29381076	NM_000600	IL6	chr7	22733290	6647684
chr7	29382237	29382658	NM_000600	IL6	chr7	22733290	6649158
chr7	29631714	29632106	NM_000600	IL6	chr7	22733290	6898620
chr7	29754073	29754466	NM_000600	IL6	chr7	22733290	7020980
chr7	29872777	29873113	NM_000600	IL6	chr7	22733290	7139655
chr7	30169564	30170004	NM_000600	IL6	chr7	22733290	7436494
chr7	30568858	30569461	NM_000600	IL6	chr7	22733290	7835870
chr10	111668427	111668754	NM_000681	ADRA2A	chr10	112826779	1158188
chr10	111684927	111685330	NM_000681	ADRA2A	chr10	112826779	1141650
chr10	111692116	111692312	NM_000681	ADRA2A	chr10	112826779	1134565
chr10	111715122	111715627	NM_000681	ADRA2A	chr10	112826779	1111404
chr10	111717068	111717528	NM_000681	ADRA2A	chr10	112826779	1109481
chr10	111831688	111832096	NM_000681	ADRA2A	chr10	112826779	994887
chr10	112060525	112060901	NM_000681	ADRA2A	chr10	112826779	766066
chr10	112125964	112126486	NM_000681	ADRA2A	chr10	112826779	700554
chr10	112129657	112129865	NM_000681	ADRA2A	chr10	112826779	697018
chr10	112138101	112138491	NM_000681	ADRA2A	chr10	112826779	688483
chr10	112148965	112149549	NM_000681	ADRA2A	chr10	112826779	677522
chr10	112196779	112197132	NM_000681	ADRA2A	chr10	112826779	629823
chr10	112209839	112210224	NM_000681	ADRA2A	chr10	112826779	616747
chr10	112238770	112239176	NM_000681	ADRA2A	chr10	112826779	587806
chr10	112255169	112255523	NM_000681	ADRA2A	chr10	112826779	571433
chr10	112261727	112262114	NM_000681	ADRA2A	chr10	112826779	564858
chr10	112275019	112275445	NM_000681	ADRA2A	chr10	112826779	551547
chr10	112277417	112278000	NM_000681	ADRA2A	chr10	112826779	549070
chr10	112283079	112283392	NM_000681	ADRA2A	chr10	112826779	543543
chr10	112285927	112286177	NM_000681	ADRA2A	chr10	112826779	540727
chr10	113637647	113638184	NM_000681	ADRA2A	chr10	112826779	811137
chr10	113830748	113831114	NM_000681	ADRA2A	chr10	112826779	1004152
chr10	114063297	114064230	NM_000681	ADRA2A	chr10	112826779	1236985
chr10	114067171	114067344	NM_000681	ADRA2A	chr10	112826779	1240479
chr10	114093137	114093544	NM_000681	ADRA2A	chr10	112826779	1266562
chr10	114111606	114111944	NM_000681	ADRA2A	chr10	112826779	1284996
chr10	114138984	114139579	NM_000681	ADRA2A	chr10	112826779	1312503
chr10	114196596	114196988	NM_000681	ADRA2A	chr10	112826779	1370013
chr10	114491717	114492025	NM_000681	ADRA2A	chr10	112826779	1665092
chr10	114606890	114607294	NM_000681	ADRA2A	chr10	112826779	1780313
chr10	114652476	114652853	NM_000681	ADRA2A	chr10	112826779	1825886
chr10	114823425	114823949	NM_000681	ADRA2A	chr10	112826779	1996908
chr10	114837133	114837617	NM_000681	ADRA2A	chr10	112826779	2010596
chr10	114843437	114844032	NM_000681	ADRA2A	chr10	112826779	2016956
chr10	114971343	114971966	NM_000681	ADRA2A	chr10	112826779	2144876
chr10	114973488	114973897	NM_000681	ADRA2A	chr10	112826779	2146914
chr10	115131574	115131940	NM_000681	ADRA2A	chr10	112826779	2304978
chr10	115276981	115277304	NM_000681	ADRA2A	chr10	112826779	2450364
chr10	115300099	115300499	NM_000681	ADRA2A	chr10	112826779	2473520
chr2	219557244	219557681	NM_000784	CYP27A1	chr2	219354715	202748
chr2	219579752	219580181	NM_000784	CYP27A1	chr2	219354715	225252
chr1	22103926	22104442	NM_000864	HTR1D	chr1	23393809	1289625
chr1	22123679	22124096	NM_000864	HTR1D	chr1	23393809	1269921
chr1	22137882	22138272	NM_000864	HTR1D	chr1	23393809	1255732
chr1	22157375	22157758	NM_000864	HTR1D	chr1	23393809	1236242
chr1	22218083	22218458	NM_000864	HTR1D	chr1	23393809	1175538
chr1	22473130	22473433	NM_000864	HTR1D	chr1	23393809	920527
chr1	22559404	22559794	NM_000864	HTR1D	chr1	23393809	834210
chr1	22569189	22569553	NM_000864	HTR1D	chr1	23393809	824438
chr1	22611575	22611991	NM_000864	HTR1D	chr1	23393809	782026
chr1	22867989	22868310	NM_000864	HTR1D	chr1	23393809	525659
chr1	22876992	22877359	NM_000864	HTR1D	chr1	23393809	516633
chr1	22941490	22941755	NM_000864	HTR1D	chr1	23393809	452186
chr1	22945150	22945547	NM_000864	HTR1D	chr1	23393809	448460
chr1	22949463	22949810	NM_000864	HTR1D	chr1	23393809	444172
chr1	23074526	23074907	NM_000864	HTR1D	chr1	23393809	319092
chr1	23301257	23301647	NM_000864	HTR1D	chr1	23393809	92357
chr1	23424114	23424511	NM_000864	HTR1D	chr1	23393809	30504
chr1	23753553	23753930	NM_000864	HTR1D	chr1	23393809	359933
chr1	23833274	23833722	NM_000864	HTR1D	chr1	23393809	439689
chr1	24068135	24068507	NM_000864	HTR1D	chr1	23393809	674512
chr1	24093380	24093852	NM_000864	HTR1D	chr1	23393809	699807
chr1	24095660	24096019	NM_000864	HTR1D	chr1	23393809	702031
chr1	24482957	24483529	NM_000864	HTR1D	chr1	23393809	1089434
chr1	24493922	24494321	NM_000864	HTR1D	chr1	23393809	1100313
chr1	24894521	24894910	NM_000864	HTR1D	chr1	23393809	1500907
chr1	24919125	24919527	NM_000864	HTR1D	chr1	23393809	1525517
chr1	24923846	24924257	NM_000864	HTR1D	chr1	23393809	1530243
chr1	24953270	24953631	NM_000864	HTR1D	chr1	23393809	1559642
chr12	81884070	81884446	NM_000899	KITLG	chr12	87498369	5614111
chr12	81899526	81899670	NM_000899	KITLG	chr12	87498369	5598771
chr12	83229047	83229405	NM_000899	KITLG	chr12	87498369	4269143
chr12	83912944	83913321	NM_000899	KITLG	chr12	87498369	3585236
chr12	84276838	84277225	NM_000899	KITLG	chr12	87498369	3221337
chr12	84498474	84498847	NM_000899	KITLG	chr12	87498369	2999708
chr12	84544376	84544751	NM_000899	KITLG	chr12	87498369	2953805
chr12	84587263	84587638	NM_000899	KITLG	chr12	87498369	2910918
chr12	85148187	85148972	NM_000899	KITLG	chr12	87498369	2349789
chr12	85165933	85166307	NM_000899	KITLG	chr12	87498369	2332249
chr12	85632594	85632988	NM_000899	KITLG	chr12	87498369	1865578
chr12	87227190	87227554	NM_000899	KITLG	chr12	87498369	270997
chr12	87633584	87633971	NM_000899	KITLG	chr12	87498369	135409
chr12	87815529	87816095	NM_000899	KITLG	chr12	87498369	317443
chr12	87986541	87986899	NM_000899	KITLG	chr12	87498369	488351
chr12	88003346	88003741	NM_000899	KITLG	chr12	87498369	505175
chr12	88019306	88019814	NM_000899	KITLG	chr12	87498369	521191
chr12	88035365	88035930	NM_000899	KITLG	chr12	87498369	537279
chr12	88063146	88063514	NM_000899	KITLG	chr12	87498369	564961
chr12	88074876	88075263	NM_000899	KITLG	chr12	87498369	576701
chr12	88078615	88078947	NM_000899	KITLG	chr12	87498369	580412
chr12	88080657	88081048	NM_000899	KITLG	chr12	87498369	582484
chr12	88081886	88082261	NM_000899	KITLG	chr12	87498369	583705
chr12	88153595	88153974	NM_000899	KITLG	chr12	87498369	655416
chr12	88156476	88156855	NM_000899	KITLG	chr12	87498369	658297
chr12	88196563	88196942	NM_000899	KITLG	chr12	87498369	698384
chr12	88226769	88226981	NM_000899	KITLG	chr12	87498369	728506
chr12	88251532	88251636	NM_000899	KITLG	chr12	87498369	753215
chr12	88264223	88264655	NM_000899	KITLG	chr12	87498369	766070
chr12	88270377	88270781	NM_000899	KITLG	chr12	87498369	772210
chr12	88271901	88272322	NM_000899	KITLG	chr12	87498369	773743
chr12	88288706	88289121	NM_000899	KITLG	chr12	87498369	790545
chr12	88293366	88293703	NM_000899	KITLG	chr12	87498369	795166
chr12	88308665	88309188	NM_000899	KITLG	chr12	87498369	810558
chr12	88330583	88330954	NM_000899	KITLG	chr12	87498369	832400
chr12	88369744	88370206	NM_000899	KITLG	chr12	87498369	871606
chr12	88372070	88372420	NM_000899	KITLG	chr12	87498369	873876
chr12	88462679	88463179	NM_000899	KITLG	chr12	87498369	964560
chr12	88917707	88918086	NM_000899	KITLG	chr12	87498369	1419528
chr12	89152110	89152491	NM_000899	KITLG	chr12	87498369	1653932
chr12	89168652	89169064	NM_000899	KITLG	chr12	87498369	1670489
chr12	89171660	89172047	NM_000899	KITLG	chr12	87498369	1673485
chr12	89559159	89559671	NM_000899	KITLG	chr12	87498369	2061046
chr12	89688725	89689124	NM_000899	KITLG	chr12	87498369	2190556
chr12	89773361	89773732	NM_000899	KITLG	chr12	87498369	2275178
chr12	90318181	90318560	NM_000899	KITLG	chr12	87498369	2820002
chr12	90455502	90456595	NM_000899	KITLG	chr12	87498369	2957680
chr12	90905913	90906293	NM_000899	KITLG	chr12	87498369	3407734
chr12	90952718	90953313	NM_000899	KITLG	chr12	87498369	3454647
chr12	91245732	91246121	NM_000899	KITLG	chr12	87498369	3747558
chr12	91299807	91300084	NM_000899	KITLG	chr12	87498369	3801577
chr12	91457161	91457546	NM_000899	KITLG	chr12	87498369	3958985
chr12	91461775	91462155	NM_000899	KITLG	chr12	87498369	3963596
chr12	91511741	91512150	NM_000899	KITLG	chr12	87498369	4013577
chr12	91655488	91655864	NM_000899	KITLG	chr12	87498369	4157307
chr12	91664086	91664466	NM_000899	KITLG	chr12	87498369	4165907
chr12	91672200	91672605	NM_000899	KITLG	chr12	87498369	4174034
chr12	91886314	91886713	NM_000899	KITLG	chr12	87498369	4388145
chr12	91938582	91938981	NM_000899	KITLG	chr12	87498369	4440413
chr12	91950729	91951114	NM_000899	KITLG	chr12	87498369	4452553
chr12	91998924	91999398	NM_000899	KITLG	chr12	87498369	4500792
chr12	92008125	92008449	NM_000899	KITLG	chr12	87498369	4509918
chr12	92048226	92048611	NM_000899	KITLG	chr12	87498369	4550050
chr12	92087226	92087603	NM_000899	KITLG	chr12	87498369	4589046
chr12	92120564	92120949	NM_000899	KITLG	chr12	87498369	4622388
chr12	92465920	92466116	NM_000899	KITLG	chr12	87498369	4967649
chr12	92695223	92695603	NM_000899	KITLG	chr12	87498369	5197044
chr12	92703128	92703487	NM_000899	KITLG	chr12	87498369	5204939
chr12	92708721	92709102	NM_000899	KITLG	chr12	87498369	5210543
chr12	92931770	92932165	NM_000899	KITLG	chr12	87498369	5433599
chr12	93018209	93018508	NM_000899	KITLG	chr12	87498369	5519990
chr12	93200604	93200975	NM_000899	KITLG	chr12	87498369	5702421
chr12	93488260	93488553	NM_000899	KITLG	chr12	87498369	5990038
chr12	93561893	93563166	NM_000899	KITLG	chr12	87498369	6064161
chr12	93593823	93594232	NM_000899	KITLG	chr12	87498369	6095659
chr12	93619619	93619994	NM_000899	KITLG	chr12	87498369	6121438
chr12	93695864	93696243	NM_000899	KITLG	chr12	87498369	6197685
chr12	93697406	93697796	NM_000899	KITLG	chr12	87498369	6199232
chr12	93861625	93862044	NM_000899	KITLG	chr12	87498369	6363466
chr12	94087252	94087627	NM_000899	KITLG	chr12	87498369	6589071
chr10	73672360	73672738	NM_000917	P4HA1	chr10	74526738	854189
chr10	73678540	73678904	NM_000917	P4HA1	chr10	74526738	848016
chr10	73698637	73698851	NM_000917	P4HA1	chr10	74526738	827994
chr10	73726979	73727362	NM_000917	P4HA1	chr10	74526738	799567
chr10	73749124	73749506	NM_000917	P4HA1	chr10	74526738	777423
chr10	73764673	73765082	NM_000917	P4HA1	chr10	74526738	761860
chr10	74316983	74317357	NM_000917	P4HA1	chr10	74526738	209568
chr5	38469348	38469743	NM_000958	PTGER4	chr5	40715788	2246242
chr5	38503150	38503567	NM_000958	PTGER4	chr5	40715788	2212429
chr5	38686758	38687135	NM_000958	PTGER4	chr5	40715788	2028841
chr5	38755330	38755718	NM_000958	PTGER4	chr5	40715788	1960264
chr5	38832215	38832606	NM_000958	PTGER4	chr5	40715788	1883377
chr5	38843344	38843717	NM_000958	PTGER4	chr5	40715788	1872257
chr5	38907662	38908214	NM_000958	PTGER4	chr5	40715788	1807850
chr5	39230255	39230667	NM_000958	PTGER4	chr5	40715788	1485327
chr5	39561680	39562072	NM_000958	PTGER4	chr5	40715788	1153912
chr5	39562788	39563173	NM_000958	PTGER4	chr5	40715788	1152807
chr5	39628278	39628653	NM_000958	PTGER4	chr5	40715788	1087322
chr5	40298826	40299250	NM_000958	PTGER4	chr5	40715788	416750
chr5	40462135	40462508	NM_000958	PTGER4	chr5	40715788	253466
chr5	40465649	40466052	NM_000958	PTGER4	chr5	40715788	249937
chr5	40712897	40713298	NM_000958	PTGER4	chr5	40715788	2690
chr5	40770655	40771119	NM_000958	PTGER4	chr5	40715788	55099
chr5	40833285	40833667	NM_000958	PTGER4	chr5	40715788	117688
chr5	41348292	41348710	NM_000958	PTGER4	chr5	40715788	632713
chr5	42911575	42911970	NM_000958	PTGER4	chr5	40715788	2195985
chr5	42986502	42986899	NM_000958	PTGER4	chr5	40715788	2270913
chr5	43029046	43029298	NM_000958	PTGER4	chr5	40715788	2313384
chr5	43070511	43070801	NM_000958	PTGER4	chr5	40715788	2354868
chr5	43080067	43080451	NM_000958	PTGER4	chr5	40715788	2364471
chr5	43550887	43551283	NM_000958	PTGER4	chr5	40715788	2835297
chr5	44337912	44338287	NM_000958	PTGER4	chr5	40715788	3622312
chr5	44547425	44547757	NM_000958	PTGER4	chr5	40715788	3831803
chr5	45421537	45421910	NM_000958	PTGER4	chr5	40715788	4705936
chr5	45438604	45438882	NM_000958	PTGER4	chr5	40715788	4722955
chr17	35724389	35724769	NM_000964	RARA	chr17	35718971	5608
chr17	35732275	35732950	NM_000964	RARA	chr17	35718971	13642
chr17	35757407	35757849	NM_000964	RARA	chr17	35718971	38657
chr1	90146829	90147163	NM_000969	RPL5	chr1	93070181	2923185
chr1	90200217	90200525	NM_000969	RPL5	chr1	93070181	2869810
chr1	90306867	90307259	NM_000969	RPL5	chr1	93070181	2763118
chr1	90548970	90549495	NM_000969	RPL5	chr1	93070181	2520948
chr1	91799907	91800292	NM_000969	RPL5	chr1	93070181	1270081
chr1	91807853	91808178	NM_000969	RPL5	chr1	93070181	1262165
chr1	91820641	91821015	NM_000969	RPL5	chr1	93070181	1249353
chr1	91875623	91876031	NM_000969	RPL5	chr1	93070181	1194354
chr1	92130091	92130477	NM_000969	RPL5	chr1	93070181	939897
chr1	92269022	92269406	NM_000969	RPL5	chr1	93070181	800967
chr1	92733177	92733608	NM_000969	RPL5	chr1	93070181	336788
chr3	87403218	87403602	NM_000986	RPL24	chr3	102888253	15484843
chr3	87680139	87680511	NM_000986	RPL24	chr3	102888253	15207928
chr3	88129150	88129540	NM_000986	RPL24	chr3	102888253	14758908
chr3	88353803	88354198	NM_000986	RPL24	chr3	102888253	14534252
chr3	96996427	96996847	NM_000986	RPL24	chr3	102888253	5891616
chr3	97468948	97469555	NM_000986	RPL24	chr3	102888253	5419001
chr3	97619396	97619798	NM_000986	RPL24	chr3	102888253	5268656
chr3	97651290	97651687	NM_000986	RPL24	chr3	102888253	5236764
chr3	98980603	98981055	NM_000986	RPL24	chr3	102888253	3907424
chr3	99931857	99932249	NM_000986	RPL24	chr3	102888253	2956200
chr3	99964662	99965049	NM_000986	RPL24	chr3	102888253	2923397
chr3	100376936	100377356	NM_000986	RPL24	chr3	102888253	2511107
chr3	100390453	100390827	NM_000986	RPL24	chr3	102888253	2497613
chr3	100557027	100557418	NM_000986	RPL24	chr3	102888253	2331030
chr3	100686331	100686852	NM_000986	RPL24	chr3	102888253	2201661
chr3	100744787	100745004	NM_000986	RPL24	chr3	102888253	2143357
chr3	100746249	100746618	NM_000986	RPL24	chr3	102888253	2141819
chr3	100922217	100923101	NM_000986	RPL24	chr3	102888253	1965594
chr3	101275050	101275379	NM_000986	RPL24	chr3	102888253	1613038
chr3	101807247	101807420	NM_000986	RPL24	chr3	102888253	1080919
chr3	101812618	101812982	NM_000986	RPL24	chr3	102888253	1075453
chr3	102386680	102386986	NM_000986	RPL24	chr3	102888253	501420
chr3	102450243	102450785	NM_000986	RPL24	chr3	102888253	437739
chr3	102714783	102715085	NM_000986	RPL24	chr3	102888253	173319
chr3	102722963	102723395	NM_000986	RPL24	chr3	102888253	165074
chr3	102909009	102909525	NM_000986	RPL24	chr3	102888253	21014
chr3	103051837	103052280	NM_000986	RPL24	chr3	102888253	163806
chr3	103142128	103142528	NM_000986	RPL24	chr3	102888253	254075
chr3	103240458	103240638	NM_000986	RPL24	chr3	102888253	352295
chr3	103283472	103283911	NM_000986	RPL24	chr3	102888253	395439
chr3	103380935	103381256	NM_000986	RPL24	chr3	102888253	492843
chr3	103381700	103382111	NM_000986	RPL24	chr3	102888253	493653
chr3	103391115	103391480	NM_000986	RPL24	chr3	102888253	503045
chr3	103593847	103594259	NM_000986	RPL24	chr3	102888253	705800
chr3	104695975	104696338	NM_000986	RPL24	chr3	102888253	1807904
chr3	104947601	104948052	NM_000986	RPL24	chr3	102888253	2059574
chr3	106111279	106111590	NM_000986	RPL24	chr3	102888253	3223182
chr3	106740092	106740492	NM_000986	RPL24	chr3	102888253	3852039
chr3	107125400	107125542	NM_000986	RPL24	chr3	102888253	4237218
chr3	107285494	107285886	NM_000986	RPL24	chr3	102888253	4397437
chr3	107407689	107408107	NM_000986	RPL24	chr3	102888253	4519645
chr3	107773362	107773720	NM_000986	RPL24	chr3	102888253	4885288
chr3	107822143	107822512	NM_000986	RPL24	chr3	102888253	4934075
chr3	107918752	107919064	NM_000986	RPL24	chr3	102888253	5030655
chr3	107946924	107947331	NM_000986	RPL24	chr3	102888253	5058875
chr3	108266746	108267218	NM_000986	RPL24	chr3	102888253	5378729
chr3	108270472	108270858	NM_000986	RPL24	chr3	102888253	5382412
chr11	114666716	114667319	NM_001001522	TAGLN	chr11	116575249	1908231
chr11	115736432	115736805	NM_001001522	TAGLN	chr11	116575249	838630
chr11	115743104	115743549	NM_001001522	TAGLN	chr11	116575249	831922
chr11	115749546	115749912	NM_001001522	TAGLN	chr11	116575249	825520
chr11	115934457	115934837	NM_001001522	TAGLN	chr11	116575249	640602
chr11	116227578	116227953	NM_001001522	TAGLN	chr11	116575249	347483
chr11	116392091	116392511	NM_001001522	TAGLN	chr11	116575249	182948
chr8	218944	219404	NM_001001924	MTUS1	chr8	17702706	17483532
chr8	422054	422424	NM_001001924	MTUS1	chr8	17702706	17280467
chr8	514887	515273	NM_001001924	MTUS1	chr8	17702706	17187626
chr8	520105	520481	NM_001001924	MTUS1	chr8	17702706	17182413
chr8	595498	595875	NM_001001924	MTUS1	chr8	17702706	17107019
chr8	611882	612316	NM_001001924	MTUS1	chr8	17702706	17090607
chr8	810363	810766	NM_001001924	MTUS1	chr8	17702706	16892141
chr8	1681765	1682153	NM_001001924	MTUS1	chr8	17702706	16020747
chr8	1722064	1722475	NM_001001924	MTUS1	chr8	17702706	15980436
chr8	1749553	1749774	NM_001001924	MTUS1	chr8	17702706	15953042
chr8	1790461	1790832	NM_001001924	MTUS1	chr8	17702706	15912059
chr8	1827606	1827943	NM_001001924	MTUS1	chr8	17702706	15874931
chr8	1830531	1830903	NM_001001924	MTUS1	chr8	17702706	15871989
chr8	2010804	2011182	NM_001001924	MTUS1	chr8	17702706	15691713
chr8	2035136	2035535	NM_001001924	MTUS1	chr8	17702706	15667370
chr8	2037156	2037369	NM_001001924	MTUS1	chr8	17702706	15665443
chr8	2114029	2114439	NM_001001924	MTUS1	chr8	17702706	15588472
chr8	2346540	2346923	NM_001001924	MTUS1	chr8	17702706	15355974
chr8	2957728	2958450	NM_001001924	MTUS1	chr8	17702706	14744617
chr8	6373418	6373700	NM_001001924	MTUS1	chr8	17702706	11329147
chr8	6392526	6392931	NM_001001924	MTUS1	chr8	17702706	11309977
chr8	6402631	6403057	NM_001001924	MTUS1	chr8	17702706	11299862
chr8	6415255	6415630	NM_001001924	MTUS1	chr8	17702706	11287263
chr8	6664582	6664931	NM_001001924	MTUS1	chr8	17702706	11037949
chr8	8183365	8183880	NM_001001924	MTUS1	chr8	17702706	9519083
chr8	8439854	8440763	NM_001001924	MTUS1	chr8	17702706	9262397
chr8	8495620	8496070	NM_001001924	MTUS1	chr8	17702706	9206861
chr8	8522439	8522798	NM_001001924	MTUS1	chr8	17702706	9180087
chr8	8686043	8686410	NM_001001924	MTUS1	chr8	17702706	9016479
chr8	8889822	8890310	NM_001001924	MTUS1	chr8	17702706	8812640
chr8	8969708	8970308	NM_001001924	MTUS1	chr8	17702706	8732698
chr8	8977053	8977441	NM_001001924	MTUS1	chr8	17702706	8725459
chr8	9034820	9035361	NM_001001924	MTUS1	chr8	17702706	8667615
chr8	9242228	9242606	NM_001001924	MTUS1	chr8	17702706	8460289
chr8	9273233	9273476	NM_001001924	MTUS1	chr8	17702706	8429351
chr8	9315451	9315777	NM_001001924	MTUS1	chr8	17702706	8387092
chr8	9412488	9412886	NM_001001924	MTUS1	chr8	17702706	8290019
chr8	10047182	10047552	NM_001001924	MTUS1	chr8	17702706	7655339
chr8	10132870	10133270	NM_001001924	MTUS1	chr8	17702706	7569636
chr8	10526681	10527050	NM_001001924	MTUS1	chr8	17702706	7175840
chr8	10531365	10531746	NM_001001924	MTUS1	chr8	17702706	7171150
chr8	10605881	10606389	NM_001001924	MTUS1	chr8	17702706	7096571
chr8	10611187	10611477	NM_001001924	MTUS1	chr8	17702706	7091374
chr8	10623222	10623757	NM_001001924	MTUS1	chr8	17702706	7079216
chr8	10672202	10672431	NM_001001924	MTUS1	chr8	17702706	7030389
chr8	10683513	10684127	NM_001001924	MTUS1	chr8	17702706	7018886
chr8	10708631	10708999	NM_001001924	MTUS1	chr8	17702706	6993891
chr8	11179161	11179548	NM_001001924	MTUS1	chr8	17702706	6523351
chr8	11657194	11657604	NM_001001924	MTUS1	chr8	17702706	6045307
chr8	11846867	11847312	NM_001001924	MTUS1	chr8	17702706	5855616
chr8	12790625	12790995	NM_001001924	MTUS1	chr8	17702706	4911896
chr8	12792595	12793015	NM_001001924	MTUS1	chr8	17702706	4909901
chr8	12829643	12830004	NM_001001924	MTUS1	chr8	17702706	4872882
chr8	12945577	12945855	NM_001001924	MTUS1	chr8	17702706	4756990
chr8	12985455	12985828	NM_001001924	MTUS1	chr8	17702706	4717064
chr8	13033890	13034118	NM_001001924	MTUS1	chr8	17702706	4668702
chr8	13070619	13070941	NM_001001924	MTUS1	chr8	17702706	4631926
chr8	13095958	13096350	NM_001001924	MTUS1	chr8	17702706	4606552
chr8	13126307	13126741	NM_001001924	MTUS1	chr8	17702706	4576182
chr8	13178400	13178792	NM_001001924	MTUS1	chr8	17702706	4524110
chr8	13254881	13255222	NM_001001924	MTUS1	chr8	17702706	4447654
chr8	13264523	13264886	NM_001001924	MTUS1	chr8	17702706	4438001
chr8	13268613	13269000	NM_001001924	MTUS1	chr8	17702706	4433899
chr8	13284876	13285281	NM_001001924	MTUS1	chr8	17702706	4417627
chr8	13361410	13361673	NM_001001924	MTUS1	chr8	17702706	4341164
chr8	13531949	13532296	NM_001001924	MTUS1	chr8	17702706	4170583
chr8	13731614	13731984	NM_001001924	MTUS1	chr8	17702706	3970907
chr8	16469322	16469710	NM_001001924	MTUS1	chr8	17702706	1233190
chr8	17509566	17510447	NM_001001924	MTUS1	chr8	17702706	192699
chr8	17516021	17516410	NM_001001924	MTUS1	chr8	17702706	186490
chr8	17520537	17520913	NM_001001924	MTUS1	chr8	17702706	181981
chr8	17563430	17563859	NM_001001924	MTUS1	chr8	17702706	139061
chr8	17564875	17565220	NM_001001924	MTUS1	chr8	17702706	137658
chr8	17571786	17572192	NM_001001924	MTUS1	chr8	17702706	130717
chr8	17824304	17824596	NM_001001924	MTUS1	chr8	17702706	121744
chr12	116684370	116684753	NM_001002252	ARL6IP4	chr12	122030832	5346270
chr12	116691032	116691300	NM_001002252	ARL6IP4	chr12	122030832	5339666
chr12	116977536	116977907	NM_001002252	ARL6IP4	chr12	122030832	5053110
chr12	117091054	117091391	NM_001002252	ARL6IP4	chr12	122030832	4939609
chr12	117347334	117347726	NM_001002252	ARL6IP4	chr12	122030832	4683302
chr12	118044305	118044684	NM_001002252	ARL6IP4	chr12	122030832	3986337
chr12	118121759	118122098	NM_001002252	ARL6IP4	chr12	122030832	3908903
chr12	118177512	118177891	NM_001002252	ARL6IP4	chr12	122030832	3853130
chr12	118180220	118180660	NM_001002252	ARL6IP4	chr12	122030832	3850392
chr12	118181670	118182069	NM_001002252	ARL6IP4	chr12	122030832	3848962
chr12	118518233	118518456	NM_001002252	ARL6IP4	chr12	122030832	3512487
chr12	118595569	118596317	NM_001002252	ARL6IP4	chr12	122030832	3434889
chr12	118615138	118615530	NM_001002252	ARL6IP4	chr12	122030832	3415498
chr12	119048836	119049193	NM_001002252	ARL6IP4	chr12	122030832	2981817
chr12	119153629	119153992	NM_001002252	ARL6IP4	chr12	122030832	2877021
chr12	119160091	119160476	NM_001002252	ARL6IP4	chr12	122030832	2870548
chr12	119164378	119164779	NM_001002252	ARL6IP4	chr12	122030832	2866253
chr12	119177026	119177386	NM_001002252	ARL6IP4	chr12	122030832	2853626
chr12	119190098	119190348	NM_001002252	ARL6IP4	chr12	122030832	2840609
chr12	119190905	119191264	NM_001002252	ARL6IP4	chr12	122030832	2839747
chr12	119204934	119205308	NM_001002252	ARL6IP4	chr12	122030832	2825711
chr12	119345276	119345485	NM_001002252	ARL6IP4	chr12	122030832	2685451
chr12	119705537	119705891	NM_001002252	ARL6IP4	chr12	122030832	2325118
chr12	120017649	120018066	NM_001002252	ARL6IP4	chr12	122030832	2012974
chr12	120043225	120043603	NM_001002252	ARL6IP4	chr12	122030832	1987418
chr12	120046891	120047203	NM_001002252	ARL6IP4	chr12	122030832	1983785
chr12	120050406	120050839	NM_001002252	ARL6IP4	chr12	122030832	1980209
chr12	120093079	120093555	NM_001002252	ARL6IP4	chr12	122030832	1937515
chr12	120119103	120119483	NM_001002252	ARL6IP4	chr12	122030832	1911539
chr12	120126947	120127321	NM_001002252	ARL6IP4	chr12	122030832	1903698
chr12	120199192	120199574	NM_001002252	ARL6IP4	chr12	122030832	1831449
chr12	120201111	120201508	NM_001002252	ARL6IP4	chr12	122030832	1829522
chr12	120201912	120202175	NM_001002252	ARL6IP4	chr12	122030832	1828788
chr12	120374789	120375181	NM_001002252	ARL6IP4	chr12	122030832	1655847
chr12	120552053	120552444	NM_001002252	ARL6IP4	chr12	122030832	1478583
chr12	120631222	120631649	NM_001002252	ARL6IP4	chr12	122030832	1399396
chr12	120846952	120847339	NM_001002252	ARL6IP4	chr12	122030832	1183686
chr12	121230992	121231413	NM_001002252	ARL6IP4	chr12	122030832	799629
chr12	121378053	121378435	NM_001002252	ARL6IP4	chr12	122030832	652588
chr12	121591695	121591852	NM_001002252	ARL6IP4	chr12	122030832	439058
chr12	121713576	121713992	NM_001002252	ARL6IP4	chr12	122030832	317048
chr12	121728735	121729091	NM_001002252	ARL6IP4	chr12	122030832	301919
chr12	121802444	121802734	NM_001002252	ARL6IP4	chr12	122030832	228243
chr12	121886487	121887051	NM_001002252	ARL6IP4	chr12	122030832	144063
chr12	121993608	121993992	NM_001002252	ARL6IP4	chr12	122030832	37032
chr12	122068224	122068688	NM_001002252	ARL6IP4	chr12	122030832	37624
chr12	122140181	122140532	NM_001002252	ARL6IP4	chr12	122030832	109525
chr12	122434082	122434460	NM_001002252	ARL6IP4	chr12	122030832	403439
chr12	122441592	122441895	NM_001002252	ARL6IP4	chr12	122030832	410912
chr12	122582532	122582937	NM_001002252	ARL6IP4	chr12	122030832	551903
chr1	55174737	55175093	NM_001004303	C1orf168	chr1	57057957	1883042
chr1	55548884	55549279	NM_001004303	C1orf168	chr1	57057957	1508875
chr1	55556372	55556771	NM_001004303	C1orf168	chr1	57057957	1501385
chr1	55571241	55571644	NM_001004303	C1orf168	chr1	57057957	1486514
chr1	55667151	55667989	NM_001004303	C1orf168	chr1	57057957	1390387
chr1	55778500	55778888	NM_001004303	C1orf168	chr1	57057957	1279263
chr1	56318214	56318867	NM_001004303	C1orf168	chr1	57057957	739416
chr1	56650072	56650527	NM_001004303	C1orf168	chr1	57057957	407657
chr1	56656453	56656944	NM_001004303	C1orf168	chr1	57057957	401258
chr1	56695878	56696247	NM_001004303	C1orf168	chr1	57057957	361894
chr1	56721417	56721801	NM_001004303	C1orf168	chr1	57057957	336348
chr1	56744600	56745100	NM_001004303	C1orf168	chr1	57057957	313107
chr1	56751381	56751710	NM_001004303	C1orf168	chr1	57057957	306411
chr1	56763786	56764257	NM_001004303	C1orf168	chr1	57057957	293935
chr1	56882261	56882802	NM_001004303	C1orf168	chr1	57057957	175425
chr1	57854265	57854646	NM_001004303	C1orf168	chr1	57057957	796499
chr1	57962353	57962740	NM_001004303	C1orf168	chr1	57057957	904590
chr1	58538809	58539200	NM_001004303	C1orf168	chr1	57057957	1481048
chr1	58633627	58634003	NM_001004303	C1orf168	chr1	57057957	1575858
chr1	58822733	58823146	NM_001004303	C1orf168	chr1	57057957	1764983
chr1	58830812	58831188	NM_001004303	C1orf168	chr1	57057957	1773043
chr1	58856701	58857082	NM_001004303	C1orf168	chr1	57057957	1798935
chr1	58956782	58957165	NM_001004303	C1orf168	chr1	57057957	1899017
chr1	58993803	58994189	NM_001004303	C1orf168	chr1	57057957	1936039
chr1	59001472	59001744	NM_001004303	C1orf168	chr1	57057957	1943651
chr1	59037795	59038391	NM_001004303	C1orf168	chr1	57057957	1980136
chr1	59087445	59087798	NM_001004303	C1orf168	chr1	57057957	2029665
chr1	59093733	59094133	NM_001004303	C1orf168	chr1	57057957	2035976
chr1	59099415	59099828	NM_001004303	C1orf168	chr1	57057957	2041665
chr1	59119777	59120169	NM_001004303	C1orf168	chr1	57057957	2062016
chr1	59121551	59121983	NM_001004303	C1orf168	chr1	57057957	2063810
chr1	59131770	59132155	NM_001004303	C1orf168	chr1	57057957	2074006
chr1	59133788	59134224	NM_001004303	C1orf168	chr1	57057957	2076049
chr1	59137205	59137604	NM_001004303	C1orf168	chr1	57057957	2079448
chr1	59263358	59264039	NM_001004303	C1orf168	chr1	57057957	2205742
chr1	59301882	59302259	NM_001004303	C1orf168	chr1	57057957	2244114
chr1	59322246	59322861	NM_001004303	C1orf168	chr1	57057957	2264597
chr1	59370490	59371008	NM_001004303	C1orf168	chr1	57057957	2312792
chr1	59381291	59381715	NM_001004303	C1orf168	chr1	57057957	2323546
chr1	59510897	59511297	NM_001004303	C1orf168	chr1	57057957	2453140
chr1	59530834	59531266	NM_001004303	C1orf168	chr1	57057957	2473093
chr1	59571202	59571593	NM_001004303	C1orf168	chr1	57057957	2513441
chr1	59661146	59661515	NM_001004303	C1orf168	chr1	57057957	2603374
chr1	59729183	59729607	NM_001004303	C1orf168	chr1	57057957	2671438
chr1	59808769	59809155	NM_001004303	C1orf168	chr1	57057957	2751005
chr1	59834727	59835178	NM_001004303	C1orf168	chr1	57057957	2776996
chr1	59917209	59917516	NM_001004303	C1orf168	chr1	57057957	2859406
chr1	59944034	59944438	NM_001004303	C1orf168	chr1	57057957	2886279
chr1	60084654	60085029	NM_001004303	C1orf168	chr1	57057957	3026885
chr1	60096913	60097301	NM_001004303	C1orf168	chr1	57057957	3039150
chr1	60519479	60519863	NM_001004303	C1orf168	chr1	57057957	3461714
chr1	60626374	60626761	NM_001004303	C1orf168	chr1	57057957	3568611
chr1	60748402	60748811	NM_001004303	C1orf168	chr1	57057957	3690650
chr1	60858388	60858775	NM_001004303	C1orf168	chr1	57057957	3800625
chr1	60997557	60997947	NM_001004303	C1orf168	chr1	57057957	3939795
chr1	61150180	61150571	NM_001004303	C1orf168	chr1	57057957	4092419
chr1	61157964	61158393	NM_001004303	C1orf168	chr1	57057957	4100222
chr1	61187637	61188016	NM_001004303	C1orf168	chr1	57057957	4129870
chr1	61196369	61196733	NM_001004303	C1orf168	chr1	57057957	4138594
chr1	61199425	61199829	NM_001004303	C1orf168	chr1	57057957	4141670
chr1	61201285	61201880	NM_001004303	C1orf168	chr1	57057957	4143626
chr1	61548853	61549243	NM_001004303	C1orf168	chr1	57057957	4491091
chr1	61556493	61556880	NM_001004303	C1orf168	chr1	57057957	4498730
chr1	61559569	61559930	NM_001004303	C1orf168	chr1	57057957	4501793
chr1	61576090	61576422	NM_001004303	C1orf168	chr1	57057957	4518299
chr1	61591104	61591497	NM_001004303	C1orf168	chr1	57057957	4533344
chr1	61596927	61597277	NM_001004303	C1orf168	chr1	57057957	4539145
chr1	61674337	61674720	NM_001004303	C1orf168	chr1	57057957	4616572
chr12	8725194	8725571	NM_001004328	ZNF705A	chr12	8216416	508967
chr12	8884681	8885060	NM_001004328	ZNF705A	chr12	8216416	668455
chr12	9040781	9041221	NM_001004328	ZNF705A	chr12	8216416	824585
chr12	9211169	9211580	NM_001004328	ZNF705A	chr12	8216416	994959
chr12	9213851	9214258	NM_001004328	ZNF705A	chr12	8216416	997639
chr12	9546019	9546418	NM_001004328	ZNF705A	chr12	8216416	1329803
chr12	9691544	9691950	NM_001004328	ZNF705A	chr12	8216416	1475331
chr12	9694561	9694982	NM_001004328	ZNF705A	chr12	8216416	1478356
chr12	9791014	9791626	NM_001004328	ZNF705A	chr12	8216416	1574904
chr12	9808656	9809035	NM_001004328	ZNF705A	chr12	8216416	1592430
chr12	10111944	10112226	NM_001004328	ZNF705A	chr12	8216416	1895669
chr14	19896504	19896858	NM_001004724	OR4N5	chr14	19681734	214947
chr14	20015575	20015981	NM_001004724	OR4N5	chr14	19681734	334044
chr14	20028527	20028913	NM_001004724	OR4N5	chr14	19681734	346986
chr14	20033146	20033968	NM_001004724	OR4N5	chr14	19681734	351823
chr14	20054916	20055286	NM_001004724	OR4N5	chr14	19681734	373367
chr14	20338162	20338567	NM_001004724	OR4N5	chr14	19681734	656631
chr14	20411790	20412169	NM_001004724	OR4N5	chr14	19681734	730246
chr14	20582251	20582687	NM_001004724	OR4N5	chr14	19681734	900735
chr14	21190455	21190851	NM_001004724	OR4N5	chr14	19681734	1508919
chr14	21195061	21195611	NM_001004724	OR4N5	chr14	19681734	1513602
chr14	21262572	21262822	NM_001004724	OR4N5	chr14	19681734	1580963
chr11	5533092	5533461	NM_001004753	OR51F2	chr11	4799191	734086
chr11	49211966	49212283	NM_001005270	OR4C12	chr11	49960647	748522
chr8	40523253	40523641	NM_001005365	POTEA	chr8	43266741	2743294
chr8	40566441	40566833	NM_001005365	POTEA	chr8	43266741	2700104
chr8	40721638	40721846	NM_001005365	POTEA	chr8	43266741	2544999
chr8	40769059	40769469	NM_001005365	POTEA	chr8	43266741	2497477
chr8	40913310	40913477	NM_001005365	POTEA	chr8	43266741	2353347
chr8	41128313	41128820	NM_001005365	POTEA	chr8	43266741	2138174
chr8	41178188	41178560	NM_001005365	POTEA	chr8	43266741	2088367
chr8	41319692	41320311	NM_001005365	POTEA	chr8	43266741	1946739
chr8	41518118	41518584	NM_001005365	POTEA	chr8	43266741	1748390
chr8	41519916	41520341	NM_001005365	POTEA	chr8	43266741	1746612
chr8	41535501	41535874	NM_001005365	POTEA	chr8	43266741	1731053
chr8	41711662	41712055	NM_001005365	POTEA	chr8	43266741	1554882
chr8	41769080	41769451	NM_001005365	POTEA	chr8	43266741	1497475
chr8	41937844	41938192	NM_001005365	POTEA	chr8	43266741	1328723
chr8	42118151	42118532	NM_001005365	POTEA	chr8	43266741	1148399
chr8	42389459	42389852	NM_001005365	POTEA	chr8	43266741	877085
chr8	42405928	42406336	NM_001005365	POTEA	chr8	43266741	860609
chr8	42526926	42527292	NM_001005365	POTEA	chr8	43266741	739632
chr8	42817536	42818084	NM_001005365	POTEA	chr8	43266741	448931
chr8	42997614	42997917	NM_001005365	POTEA	chr8	43266741	268975
chr8	43014804	43015229	NM_001005365	POTEA	chr8	43266741	251724
chr8	48786805	48787172	NM_001005365	POTEA	chr8	43266741	5520248
chr8	48810026	48810203	NM_001005365	POTEA	chr8	43266741	5543374
chr14	65618589	65618895	NM_001005743	NUMB	chr14	72995039	7376297
chr14	65867456	65867785	NM_001005743	NUMB	chr14	72995039	7127418
chr14	66666128	66666512	NM_001005743	NUMB	chr14	72995039	6328719
chr14	66817155	66817380	NM_001005743	NUMB	chr14	72995039	6177771
chr14	66932280	66932669	NM_001005743	NUMB	chr14	72995039	6062564
chr14	66950606	66951003	NM_001005743	NUMB	chr14	72995039	6044234
chr14	67271185	67271522	NM_001005743	NUMB	chr14	72995039	5723685
chr14	67645682	67646359	NM_001005743	NUMB	chr14	72995039	5349018
chr14	67934248	67934653	NM_001005743	NUMB	chr14	72995039	5060588
chr14	67995417	67995917	NM_001005743	NUMB	chr14	72995039	4999372
chr14	68001182	68001588	NM_001005743	NUMB	chr14	72995039	4993654
chr14	68031637	68032281	NM_001005743	NUMB	chr14	72995039	4963080
chr14	68037570	68037916	NM_001005743	NUMB	chr14	72995039	4957296
chr14	68149154	68149548	NM_001005743	NUMB	chr14	72995039	4845688
chr14	68219273	68219646	NM_001005743	NUMB	chr14	72995039	4775579
chr14	68221277	68221651	NM_001005743	NUMB	chr14	72995039	4773575
chr14	68231702	68231981	NM_001005743	NUMB	chr14	72995039	4763197
chr14	68308163	68308551	NM_001005743	NUMB	chr14	72995039	4686682
chr14	68487460	68487877	NM_001005743	NUMB	chr14	72995039	4507370
chr14	68495024	68495390	NM_001005743	NUMB	chr14	72995039	4499832
chr14	68505623	68506024	NM_001005743	NUMB	chr14	72995039	4489215
chr14	68574760	68575138	NM_001005743	NUMB	chr14	72995039	4420090
chr14	68943605	68943968	NM_001005743	NUMB	chr14	72995039	4051252
chr14	69001257	69001658	NM_001005743	NUMB	chr14	72995039	3993581
chr14	69122888	69123259	NM_001005743	NUMB	chr14	72995039	3871965
chr14	69161874	69162290	NM_001005743	NUMB	chr14	72995039	3832957
chr14	69238314	69238744	NM_001005743	NUMB	chr14	72995039	3756510
chr14	69239538	69239911	NM_001005743	NUMB	chr14	72995039	3755314
chr14	69255937	69256312	NM_001005743	NUMB	chr14	72995039	3738914
chr14	69289886	69290200	NM_001005743	NUMB	chr14	72995039	3704996
chr14	69723423	69723693	NM_001005743	NUMB	chr14	72995039	3271481
chr14	70419516	70419934	NM_001005743	NUMB	chr14	72995039	2575314
chr14	70667043	70667485	NM_001005743	NUMB	chr14	72995039	2327775
chr14	70702098	70702569	NM_001005743	NUMB	chr14	72995039	2292705
chr14	70783068	70783405	NM_001005743	NUMB	chr14	72995039	2211802
chr14	70854571	70854799	NM_001005743	NUMB	chr14	72995039	2140354
chr14	70861266	70861662	NM_001005743	NUMB	chr14	72995039	2133575
chr14	71076078	71076844	NM_001005743	NUMB	chr14	72995039	1918578
chr14	71128388	71128776	NM_001005743	NUMB	chr14	72995039	1866457
chr14	71156865	71157234	NM_001005743	NUMB	chr14	72995039	1837989
chr14	71371308	71371733	NM_001005743	NUMB	chr14	72995039	1623518
chr14	71987033	71987448	NM_001005743	NUMB	chr14	72995039	1007798
chr14	72064975	72065362	NM_001005743	NUMB	chr14	72995039	929870
chr14	72152150	72152558	NM_001005743	NUMB	chr14	72995039	842685
chr14	72153753	72154177	NM_001005743	NUMB	chr14	72995039	841074
chr14	72168930	72169564	NM_001005743	NUMB	chr14	72995039	825792
chr14	72174390	72174907	NM_001005743	NUMB	chr14	72995039	820390
chr14	72179744	72180156	NM_001005743	NUMB	chr14	72995039	815089
chr14	72187522	72187826	NM_001005743	NUMB	chr14	72995039	807365
chr14	72278564	72278936	NM_001005743	NUMB	chr14	72995039	716289
chr14	72420482	72420749	NM_001005743	NUMB	chr14	72995039	574423
chr14	72429273	72429651	NM_001005743	NUMB	chr14	72995039	565577
chr14	72474093	72474357	NM_001005743	NUMB	chr14	72995039	520814
chr14	72551727	72552117	NM_001005743	NUMB	chr14	72995039	443117
chr14	72847896	72848076	NM_001005743	NUMB	chr14	72995039	147053
chr14	72999885	73000376	NM_001005743	NUMB	chr14	72995039	5092
chr14	73002543	73003016	NM_001005743	NUMB	chr14	72995039	7741
chrY	15434085	15434488	NM_001005852	CYorf15A	chrY	20188622	4754335
chrY	16923665	16924090	NM_001005852	CYorf15A	chrY	20188622	3264744
chrY	17690801	17692125	NM_001005852	CYorf15A	chrY	20188622	2497159
chrY	57436786	57437336	NM_001005852	CYorf15A	chrY	20188622	37248439
chr1	93792974	93793222	NM_001006605	FAM69A	chr1	93199667	593431
chr1	93863710	93864099	NM_001006605	FAM69A	chr1	93199667	664238
chr1	93904929	93905301	NM_001006605	FAM69A	chr1	93199667	705448
chr14	96447722	96448474	NM_001008707	EML1	chr14	99329497	2881399
chr14	99042354	99042732	NM_001008707	EML1	chr14	99329497	286954
chr14	99155900	99156309	NM_001008707	EML1	chr14	99329497	173392
chr14	99224234	99224675	NM_001008707	EML1	chr14	99329497	105042
chr14	99234880	99235424	NM_001008707	EML1	chr14	99329497	94345
chr14	99288653	99288881	NM_001008707	EML1	chr14	99329497	40730
chr3	1349005	1349388	NM_001012410	SGOL1	chr3	20202687	18853490
chr3	1635104	1635477	NM_001012410	SGOL1	chr3	20202687	18567396
chr3	1996772	1997144	NM_001012410	SGOL1	chr3	20202687	18205729
chr3	3190042	3190447	NM_001012410	SGOL1	chr3	20202687	17012442
chr3	3208657	3209029	NM_001012410	SGOL1	chr3	20202687	16993844
chr3	4353886	4354070	NM_001012410	SGOL1	chr3	20202687	15848709
chr3	4410870	4411093	NM_001012410	SGOL1	chr3	20202687	15791705
chr3	4433581	4434050	NM_001012410	SGOL1	chr3	20202687	15768871
chr3	4493198	4493661	NM_001012410	SGOL1	chr3	20202687	15709257
chr3	4550430	4550833	NM_001012410	SGOL1	chr3	20202687	15652055
chr3	4719630	4719963	NM_001012410	SGOL1	chr3	20202687	15482890
chr3	4724899	4725273	NM_001012410	SGOL1	chr3	20202687	15477601
chr3	4758098	4758677	NM_001012410	SGOL1	chr3	20202687	15444299
chr3	4761460	4761637	NM_001012410	SGOL1	chr3	20202687	15441138
chr3	4831013	4831545	NM_001012410	SGOL1	chr3	20202687	15371408
chr3	4847639	4848265	NM_001012410	SGOL1	chr3	20202687	15354735
chr3	4872442	4872778	NM_001012410	SGOL1	chr3	20202687	15330077
chr3	4993790	4994227	NM_001012410	SGOL1	chr3	20202687	15208678
chr3	5002382	5002796	NM_001012410	SGOL1	chr3	20202687	15200098
chr3	5047940	5048292	NM_001012410	SGOL1	chr3	20202687	15154571
chr3	5132424	5132831	NM_001012410	SGOL1	chr3	20202687	15070059
chr3	7307111	7307478	NM_001012410	SGOL1	chr3	20202687	12895392
chr3	7326346	7326743	NM_001012410	SGOL1	chr3	20202687	12876142
chr3	7723921	7724317	NM_001012410	SGOL1	chr3	20202687	12478568
chr3	7726398	7726780	NM_001012410	SGOL1	chr3	20202687	12476098
chr3	7893313	7893922	NM_001012410	SGOL1	chr3	20202687	12309069
chr3	8328125	8328466	NM_001012410	SGOL1	chr3	20202687	11874391
chr3	8373945	8374276	NM_001012410	SGOL1	chr3	20202687	11828576
chr3	8522318	8522719	NM_001012410	SGOL1	chr3	20202687	11680168
chr3	8557022	8557479	NM_001012410	SGOL1	chr3	20202687	11645436
chr3	8587956	8588365	NM_001012410	SGOL1	chr3	20202687	11614526
chr3	8747341	8747712	NM_001012410	SGOL1	chr3	20202687	11455160
chr3	8982228	8982677	NM_001012410	SGOL1	chr3	20202687	11220234
chr3	9379507	9379922	NM_001012410	SGOL1	chr3	20202687	10822972
chr3	9918684	9919078	NM_001012410	SGOL1	chr3	20202687	10283806
chr3	10206200	10206643	NM_001012410	SGOL1	chr3	20202687	9996265
chr3	10208467	10209244	NM_001012410	SGOL1	chr3	20202687	9993831
chr3	10241456	10241857	NM_001012410	SGOL1	chr3	20202687	9961030
chr3	10245263	10245639	NM_001012410	SGOL1	chr3	20202687	9957236
chr3	10326464	10326856	NM_001012410	SGOL1	chr3	20202687	9876027
chr3	10371027	10371371	NM_001012410	SGOL1	chr3	20202687	9831488
chr3	10453955	10454374	NM_001012410	SGOL1	chr3	20202687	9748522
chr3	10505041	10505643	NM_001012410	SGOL1	chr3	20202687	9697345
chr3	11033347	11033776	NM_001012410	SGOL1	chr3	20202687	9169125
chr3	11218328	11218686	NM_001012410	SGOL1	chr3	20202687	8984180
chr3	11383564	11383946	NM_001012410	SGOL1	chr3	20202687	8818932
chr3	11402405	11402796	NM_001012410	SGOL1	chr3	20202687	8800086
chr3	11512531	11512908	NM_001012410	SGOL1	chr3	20202687	8689967
chr3	11530754	11531150	NM_001012410	SGOL1	chr3	20202687	8671735
chr3	11659277	11659614	NM_001012410	SGOL1	chr3	20202687	8543241
chr3	11678065	11678758	NM_001012410	SGOL1	chr3	20202687	8524275
chr3	12194570	12194819	NM_001012410	SGOL1	chr3	20202687	8007992
chr3	12396512	12396872	NM_001012410	SGOL1	chr3	20202687	7805995
chr3	12422225	12422635	NM_001012410	SGOL1	chr3	20202687	7780257
chr3	13025823	13026214	NM_001012410	SGOL1	chr3	20202687	7176668
chr3	13147336	13147708	NM_001012410	SGOL1	chr3	20202687	7055165
chr3	13149229	13149583	NM_001012410	SGOL1	chr3	20202687	7053281
chr3	13313124	13313529	NM_001012410	SGOL1	chr3	20202687	6889360
chr3	13578472	13578858	NM_001012410	SGOL1	chr3	20202687	6624022
chr3	13762841	13763287	NM_001012410	SGOL1	chr3	20202687	6439623
chr3	14235086	14235543	NM_001012410	SGOL1	chr3	20202687	5967372
chr3	14241972	14242355	NM_001012410	SGOL1	chr3	20202687	5960523
chr3	14249375	14249660	NM_001012410	SGOL1	chr3	20202687	5953169
chr3	14397166	14397542	NM_001012410	SGOL1	chr3	20202687	5805333
chr3	14777805	14778226	NM_001012410	SGOL1	chr3	20202687	5424671
chr3	15308330	15309123	NM_001012410	SGOL1	chr3	20202687	4893960
chr3	15309434	15310189	NM_001012410	SGOL1	chr3	20202687	4892875
chr3	15316837	15317707	NM_001012410	SGOL1	chr3	20202687	4885415
chr3	15344501	15344770	NM_001012410	SGOL1	chr3	20202687	4858051
chr3	15385275	15385690	NM_001012410	SGOL1	chr3	20202687	4817204
chr3	15527166	15527539	NM_001012410	SGOL1	chr3	20202687	4675334
chr3	15652554	15653327	NM_001012410	SGOL1	chr3	20202687	4549746
chr3	15664079	15664429	NM_001012410	SGOL1	chr3	20202687	4538433
chr3	16067661	16067956	NM_001012410	SGOL1	chr3	20202687	4134878
chr3	16076825	16077230	NM_001012410	SGOL1	chr3	20202687	4125659
chr3	16126489	16126878	NM_001012410	SGOL1	chr3	20202687	4076003
chr3	16156906	16157364	NM_001012410	SGOL1	chr3	20202687	4045552
chr3	16511283	16511649	NM_001012410	SGOL1	chr3	20202687	3691221
chr3	16528539	16528960	NM_001012410	SGOL1	chr3	20202687	3673937
chr3	16855695	16856750	NM_001012410	SGOL1	chr3	20202687	3346464
chr3	16933344	16933760	NM_001012410	SGOL1	chr3	20202687	3269135
chr3	17012666	17013052	NM_001012410	SGOL1	chr3	20202687	3189828
chr3	20040313	20040687	NM_001012410	SGOL1	chr3	20202687	162187
chr7	45246338	45246689	NM_001013398	IGFBP3	chr7	45927396	680882
chr7	45250137	45250694	NM_001013398	IGFBP3	chr7	45927396	676980
chr7	45691344	45691836	NM_001013398	IGFBP3	chr7	45927396	235806
chr7	45695678	45695979	NM_001013398	IGFBP3	chr7	45927396	231567
chr7	45895674	45896078	NM_001013398	IGFBP3	chr7	45927396	31520
chr7	46351718	46352096	NM_001013398	IGFBP3	chr7	45927396	424511
chr7	46588235	46588615	NM_001013398	IGFBP3	chr7	45927396	661029
chr7	46723102	46723519	NM_001013398	IGFBP3	chr7	45927396	795915
chr7	46761249	46761629	NM_001013398	IGFBP3	chr7	45927396	834043
chr7	46770243	46770644	NM_001013398	IGFBP3	chr7	45927396	843048
chr7	46786382	46786759	NM_001013398	IGFBP3	chr7	45927396	859175
chr7	46866026	46866598	NM_001013398	IGFBP3	chr7	45927396	938916
chr7	47459412	47459768	NM_001013398	IGFBP3	chr7	45927396	1532194
chr7	47464294	47464692	NM_001013398	IGFBP3	chr7	45927396	1537097
chr7	47488406	47488911	NM_001013398	IGFBP3	chr7	45927396	1561263
chr7	47628585	47629024	NM_001013398	IGFBP3	chr7	45927396	1701409
chr7	47946603	47947001	NM_001013398	IGFBP3	chr7	45927396	2019406
chr7	47947626	47947990	NM_001013398	IGFBP3	chr7	45927396	2020412
chr7	47949741	47950141	NM_001013398	IGFBP3	chr7	45927396	2022545
chr7	47952913	47953281	NM_001013398	IGFBP3	chr7	45927396	2025701
chr7	48155116	48155516	NM_001013398	IGFBP3	chr7	45927396	2227920
chr7	48235115	48235496	NM_001013398	IGFBP3	chr7	45927396	2307910
chr7	48453784	48454261	NM_001013398	IGFBP3	chr7	45927396	2526627
chr15	53106332	53106709	NM_001018090	GCOM1	chr15	55671405	2564884
chr15	53816801	53817195	NM_001018090	GCOM1	chr15	55671405	1854407
chr15	53818147	53818558	NM_001018090	GCOM1	chr15	55671405	1853052
chr15	53865297	53865749	NM_001018090	GCOM1	chr15	55671405	1805882
chr15	53976571	53977534	NM_001018090	GCOM1	chr15	55671405	1694352
chr15	54894751	54895138	NM_001018090	GCOM1	chr15	55671405	776460
chr15	54981538	54981831	NM_001018090	GCOM1	chr15	55671405	689720
chr15	55230176	55230557	NM_001018090	GCOM1	chr15	55671405	441038
chr15	55413936	55414238	NM_001018090	GCOM1	chr15	55671405	257318
chr15	55415104	55415563	NM_001018090	GCOM1	chr15	55671405	256071
chr15	55417483	55417828	NM_001018090	GCOM1	chr15	55671405	253749
chr15	55537957	55538348	NM_001018090	GCOM1	chr15	55671405	133252
chr15	55631186	55631584	NM_001018090	GCOM1	chr15	55671405	40020
chr15	55657902	55658302	NM_001018090	GCOM1	chr15	55671405	13303
chr15	55713614	55714034	NM_001018090	GCOM1	chr15	55671405	42419
chr15	55868588	55868972	NM_001018090	GCOM1	chr15	55671405	197375
chr15	56259239	56259953	NM_001018090	GCOM1	chr15	55671405	588191
chr15	56411349	56412124	NM_001018090	GCOM1	chr15	55671405	740332
chr15	56456207	56456590	NM_001018090	GCOM1	chr15	55671405	784994
chr15	56552687	56553152	NM_001018090	GCOM1	chr15	55671405	881515
chr15	57054900	57055683	NM_001018090	GCOM1	chr15	55671405	1383887
chr15	57303948	57304348	NM_001018090	GCOM1	chr15	55671405	1632743
chr15	57833822	57834016	NM_001018090	GCOM1	chr15	55671405	2162514
chr15	58407356	58408325	NM_001018090	GCOM1	chr15	55671405	2736436
chr15	58449836	58450398	NM_001018090	GCOM1	chr15	55671405	2778712
chr15	58472444	58472966	NM_001018090	GCOM1	chr15	55671405	2801300
chr15	58685516	58685904	NM_001018090	GCOM1	chr15	55671405	3014305
chr15	58693609	58693967	NM_001018090	GCOM1	chr15	55671405	3022383
chr15	58831568	58831957	NM_001018090	GCOM1	chr15	55671405	3160358
chr15	59177391	59177809	NM_001018090	GCOM1	chr15	55671405	3506195
chr15	59235797	59236219	NM_001018090	GCOM1	chr15	55671405	3564603
chr15	59249453	59249795	NM_001018090	GCOM1	chr15	55671405	3578219
chr15	59253796	59254214	NM_001018090	GCOM1	chr15	55671405	3582600
chr15	59285021	59285276	NM_001018090	GCOM1	chr15	55671405	3613744
chr15	59528496	59528878	NM_001018090	GCOM1	chr15	55671405	3857282
chr15	59539537	59539920	NM_001018090	GCOM1	chr15	55671405	3868324
chr15	59554341	59554740	NM_001018090	GCOM1	chr15	55671405	3883136
chr15	59581312	59581682	NM_001018090	GCOM1	chr15	55671405	3910092
chr15	59608095	59608325	NM_001018090	GCOM1	chr15	55671405	3936805
chr15	59610313	59610741	NM_001018090	GCOM1	chr15	55671405	3939122
chr15	59686739	59686915	NM_001018090	GCOM1	chr15	55671405	4015422
chr15	59857897	59858330	NM_001018090	GCOM1	chr15	55671405	4186709
chr15	60203606	60204111	NM_001018090	GCOM1	chr15	55671405	4532454
chr15	60245633	60246040	NM_001018090	GCOM1	chr15	55671405	4574432
chr15	60252646	60253118	NM_001018090	GCOM1	chr15	55671405	4581477
chr22	38672577	38672983	NM_001024843	TNRC6B	chr22	38770766	97986
chr22	38847079	38847346	NM_001024843	TNRC6B	chr22	38770766	76447
chr22	38941227	38941607	NM_001024843	TNRC6B	chr22	38770766	170651
chr22	38965030	38965505	NM_001024843	TNRC6B	chr22	38770766	194502
chr22	38989132	38989519	NM_001024843	TNRC6B	chr22	38770766	218560
chr22	38991735	38992125	NM_001024843	TNRC6B	chr22	38770766	221164
chr10	90957489	90957860	NM_001031683	IFIT3	chr10	91082218	124543
chr10	91029107	91029828	NM_001031683	IFIT3	chr10	91082218	52750
chr10	91077898	91078275	NM_001031683	IFIT3	chr10	91082218	4131
chr10	91204615	91205028	NM_001031683	IFIT3	chr10	91082218	122604
chr10	91219262	91219662	NM_001031683	IFIT3	chr10	91082218	137244
chrX	114163901	114164316	NM_001031855	LONRF3	chrX	117992740	3828631
chrX	114170971	114171333	NM_001031855	LONRF3	chrX	117992740	3821588
chrX	114590785	114591178	NM_001031855	LONRF3	chrX	117992740	3401758
chrX	114599660	114599862	NM_001031855	LONRF3	chrX	117992740	3392979
chrX	115317609	115318025	NM_001031855	LONRF3	chrX	117992740	2674923
chrX	116948088	116948481	NM_001031855	LONRF3	chrX	117992740	1044455
chrX	117239308	117239678	NM_001031855	LONRF3	chrX	117992740	753247
chrX	117243193	117243548	NM_001031855	LONRF3	chrX	117992740	749369
chrX	117820830	117821248	NM_001031855	LONRF3	chrX	117992740	171701
chrX	117821676	117822066	NM_001031855	LONRF3	chrX	117992740	170869
chrX	117863285	117863671	NM_001031855	LONRF3	chrX	117992740	129262
chrX	118033437	118033767	NM_001031855	LONRF3	chrX	117992740	40862
chr12	48705556	48705973	NM_001033873	SMAGP	chr12	49950261	1244496
chr12	48866017	48866386	NM_001033873	SMAGP	chr12	49950261	1084059
chr12	48892180	48892559	NM_001033873	SMAGP	chr12	49950261	1057891
chr12	48955663	48956035	NM_001033873	SMAGP	chr12	49950261	994412
chr12	49269941	49270353	NM_001033873	SMAGP	chr12	49950261	680114
chr12	49926308	49926693	NM_001033873	SMAGP	chr12	49950261	23760
chr12	49948435	49948830	NM_001033873	SMAGP	chr12	49950261	1628
chr12	49993104	49993483	NM_001033873	SMAGP	chr12	49950261	43033
chr12	50048940	50049364	NM_001033873	SMAGP	chr12	49950261	98891
chr12	50054385	50054808	NM_001033873	SMAGP	chr12	49950261	104336
chr12	50074288	50074693	NM_001033873	SMAGP	chr12	49950261	124230
chr12	50396985	50397373	NM_001033873	SMAGP	chr12	49950261	446918
chr12	50424428	50424541	NM_001033873	SMAGP	chr12	49950261	474224
chr10	119997750	119998101	NM_001033925	TIAL1	chr10	121346531	1348605
chr10	120447913	120448349	NM_001033925	TIAL1	chr10	121346531	898400
chr10	120619952	120620449	NM_001033925	TIAL1	chr10	121346531	726330
chr10	120668205	120668620	NM_001033925	TIAL1	chr10	121346531	678118
chr10	120777978	120778262	NM_001033925	TIAL1	chr10	121346531	568411
chr10	120952455	120952838	NM_001033925	TIAL1	chr10	121346531	393884
chr10	120955686	120956083	NM_001033925	TIAL1	chr10	121346531	390646
chr10	121030118	121030485	NM_001033925	TIAL1	chr10	121346531	316229
chr10	121055635	121056000	NM_001033925	TIAL1	chr10	121346531	290713
chr10	121094238	121094421	NM_001033925	TIAL1	chr10	121346531	252201
chr10	121120380	121120753	NM_001033925	TIAL1	chr10	121346531	225964
chr10	121159413	121159816	NM_001033925	TIAL1	chr10	121346531	186916
chr10	121238968	121239399	NM_001033925	TIAL1	chr10	121346531	107347
chr10	121271369	121271763	NM_001033925	TIAL1	chr10	121346531	74965
chr10	121289567	121289982	NM_001033925	TIAL1	chr10	121346531	56756
chr10	121429591	121429981	NM_001033925	TIAL1	chr10	121346531	83255
chr10	121436188	121436767	NM_001033925	TIAL1	chr10	121346531	89947
chr10	121442753	121443134	NM_001033925	TIAL1	chr10	121346531	96413
chr10	121519469	121519851	NM_001033925	TIAL1	chr10	121346531	173129
chr10	121536945	121537351	NM_001033925	TIAL1	chr10	121346531	190617
chr10	121621403	121621777	NM_001033925	TIAL1	chr10	121346531	275059
chr10	121797589	121797966	NM_001033925	TIAL1	chr10	121346531	451247
chr10	122210313	122210701	NM_001033925	TIAL1	chr10	121346531	863976
chr10	122385462	122385875	NM_001033925	TIAL1	chr10	121346531	1039138
chr10	122391177	122391597	NM_001033925	TIAL1	chr10	121346531	1044856
chr10	122433708	122434287	NM_001033925	TIAL1	chr10	121346531	1087467
chr10	123396097	123396309	NM_001033925	TIAL1	chr10	121346531	2049672
chr10	123801279	123801582	NM_001033925	TIAL1	chr10	121346531	2454900
chr10	123803982	123804341	NM_001033925	TIAL1	chr10	121346531	2457631
chr11	110729745	110730039	NM_001037954	DIXDC1	chr11	111313136	583244
chr11	110822417	110822815	NM_001037954	DIXDC1	chr11	111313136	490520
chr11	111195036	111195412	NM_001037954	DIXDC1	chr11	111313136	117912
chr11	111668094	111668469	NM_001037954	DIXDC1	chr11	111313136	355146
chr11	111986784	111987332	NM_001037954	DIXDC1	chr11	111313136	673922
chr18	45465541	45466030	NM_001039535	SKA1	chr18	46155389	689603
chr18	45471601	45472005	NM_001039535	SKA1	chr18	46155389	683586
chr18	46887503	46888762	NM_001039535	SKA1	chr18	46155389	732744
chr18	46991957	46992327	NM_001039535	SKA1	chr18	46155389	836753
chr18	47107367	47107737	NM_001039535	SKA1	chr18	46155389	952163
chr18	47141898	47142279	NM_001039535	SKA1	chr18	46155389	986700
chr18	49905772	49906176	NM_001039535	SKA1	chr18	46155389	3750585
chr18	50169092	50169545	NM_001039535	SKA1	chr18	46155389	4013930
chr18	50560901	50561241	NM_001039535	SKA1	chr18	46155389	4405682
chr18	50624326	50624639	NM_001039535	SKA1	chr18	46155389	4469094
chr18	50723425	50723793	NM_001039535	SKA1	chr18	46155389	4568220
chr18	50748753	50749090	NM_001039535	SKA1	chr18	46155389	4593533
chr18	50750704	50751027	NM_001039535	SKA1	chr18	46155389	4595477
chr18	50764364	50764735	NM_001039535	SKA1	chr18	46155389	4609161
chr18	50808988	50809540	NM_001039535	SKA1	chr18	46155389	4653875
chr18	50915516	50916030	NM_001039535	SKA1	chr18	46155389	4760384
chr18	50928606	50928983	NM_001039535	SKA1	chr18	46155389	4773406
chr18	50937580	50937963	NM_001039535	SKA1	chr18	46155389	4782383
chr18	50957518	50957890	NM_001039535	SKA1	chr18	46155389	4802315
chr18	51052122	51052493	NM_001039535	SKA1	chr18	46155389	4896919
chr18	51084096	51084440	NM_001039535	SKA1	chr18	46155389	4928879
chr18	51180420	51180679	NM_001039535	SKA1	chr18	46155389	5025161
chr18	51219993	51220477	NM_001039535	SKA1	chr18	46155389	5064846
chr18	51231721	51232103	NM_001039535	SKA1	chr18	46155389	5076523
chr18	51329093	51329481	NM_001039535	SKA1	chr18	46155389	5173898
chr18	51586471	51586879	NM_001039535	SKA1	chr18	46155389	5431286
chr18	51838236	51838597	NM_001039535	SKA1	chr18	46155389	5683028
chr18	51901245	51901671	NM_001039535	SKA1	chr18	46155389	5746069
chr18	52149008	52149397	NM_001039535	SKA1	chr18	46155389	5993814
chr18	52261781	52262118	NM_001039535	SKA1	chr18	46155389	6106561
chr18	52277702	52278060	NM_001039535	SKA1	chr18	46155389	6122492
chr18	52607448	52607917	NM_001039535	SKA1	chr18	46155389	6452294
chr18	52908005	52908438	NM_001039535	SKA1	chr18	46155389	6752833
chr18	52914311	52914609	NM_001039535	SKA1	chr18	46155389	6759071
chr18	53486338	53486669	NM_001039535	SKA1	chr18	46155389	7331115
chr18	53493014	53493534	NM_001039535	SKA1	chr18	46155389	7337885
chr18	53546200	53546967	NM_001039535	SKA1	chr18	46155389	7391195
chr18	53598868	53599282	NM_001039535	SKA1	chr18	46155389	7443686
chr18	53602218	53602602	NM_001039535	SKA1	chr18	46155389	7447021
chr18	53638263	53638695	NM_001039535	SKA1	chr18	46155389	7483090
chr18	53643170	53643291	NM_001039535	SKA1	chr18	46155389	7487842
chr18	53675449	53675575	NM_001039535	SKA1	chr18	46155389	7520123
chr18	53734546	53734944	NM_001039535	SKA1	chr18	46155389	7579356
chr18	54042328	54042787	NM_001039535	SKA1	chr18	46155389	7887169
chr18	54133903	54134355	NM_001039535	SKA1	chr18	46155389	7978740
chr18	54607684	54608076	NM_001039535	SKA1	chr18	46155389	8452491
chr18	54671348	54671709	NM_001039535	SKA1	chr18	46155389	8516140
chr18	54705855	54706289	NM_001039535	SKA1	chr18	46155389	8550683
chr18	54760479	54760780	NM_001039535	SKA1	chr18	46155389	8605241
chr18	54814252	54814630	NM_001039535	SKA1	chr18	46155389	8659052
chr18	55063696	55064066	NM_001039535	SKA1	chr18	46155389	8908492
chr18	55673201	55673511	NM_001039535	SKA1	chr18	46155389	9517967
chr18	55700214	55700637	NM_001039535	SKA1	chr18	46155389	9545037
chr18	56572636	56573011	NM_001039535	SKA1	chr18	46155389	10417435
chr18	56796415	56797112	NM_001039535	SKA1	chr18	46155389	10641375
chr18	57424998	57425377	NM_001039535	SKA1	chr18	46155389	11269799
chr18	57537873	57538257	NM_001039535	SKA1	chr18	46155389	11382676
chr18	57567317	57567623	NM_001039535	SKA1	chr18	46155389	11412081
chr18	57649320	57649751	NM_001039535	SKA1	chr18	46155389	11494147
chr18	57651570	57651885	NM_001039535	SKA1	chr18	46155389	11496339
chr18	57924500	57924863	NM_001039535	SKA1	chr18	46155389	11769293
chr18	58149718	58150560	NM_001039535	SKA1	chr18	46155389	11994750
chr18	58152333	58152732	NM_001039535	SKA1	chr18	46155389	11997144
chr18	58269147	58269537	NM_001039535	SKA1	chr18	46155389	12113953
chr18	58827174	58827506	NM_001039535	SKA1	chr18	46155389	12671951
chr18	58930367	58930741	NM_001039535	SKA1	chr18	46155389	12775165
chr18	58956333	58956738	NM_001039535	SKA1	chr18	46155389	12801147
chr18	59116882	59117257	NM_001039535	SKA1	chr18	46155389	12961681
chr18	59121724	59122167	NM_001039535	SKA1	chr18	46155389	12966557
chr18	59195615	59195986	NM_001039535	SKA1	chr18	46155389	13040412
chr18	59409421	59409810	NM_001039535	SKA1	chr18	46155389	13254227
chr18	59500912	59501295	NM_001039535	SKA1	chr18	46155389	13345715
chr18	59563297	59564096	NM_001039535	SKA1	chr18	46155389	13408308
chr18	59606713	59607087	NM_001039535	SKA1	chr18	46155389	13451511
chr18	59700017	59700406	NM_001039535	SKA1	chr18	46155389	13544823
chr18	59715413	59715777	NM_001039535	SKA1	chr18	46155389	13560206
chr18	59754262	59754643	NM_001039535	SKA1	chr18	46155389	13599064
chr18	59781294	59781567	NM_001039535	SKA1	chr18	46155389	13626042
chr18	60094929	60095350	NM_001039535	SKA1	chr18	46155389	13939751
chr18	60183283	60183670	NM_001039535	SKA1	chr18	46155389	14028088
chr18	60263085	60263500	NM_001039535	SKA1	chr18	46155389	14107904
chr18	60447502	60447899	NM_001039535	SKA1	chr18	46155389	14292312
chr18	61193152	61193541	NM_001039535	SKA1	chr18	46155389	15037958
chr18	61808464	61808845	NM_001039535	SKA1	chr18	46155389	15653266
chr18	62501206	62501601	NM_001039535	SKA1	chr18	46155389	16346015
chr18	62695623	62696027	NM_001039535	SKA1	chr18	46155389	16540436
chr18	63013107	63013583	NM_001039535	SKA1	chr18	46155389	16857956
chr18	63083910	63084262	NM_001039535	SKA1	chr18	46155389	16928697
chr18	63394482	63395160	NM_001039535	SKA1	chr18	46155389	17239432
chr18	63481262	63481646	NM_001039535	SKA1	chr18	46155389	17326065
chr18	63588855	63589267	NM_001039535	SKA1	chr18	46155389	17433672
chr18	63656081	63656731	NM_001039535	SKA1	chr18	46155389	17501017
chr18	64254694	64255083	NM_001039535	SKA1	chr18	46155389	18099500
chr18	64322889	64323304	NM_001039535	SKA1	chr18	46155389	18167708
chr18	64349682	64350011	NM_001039535	SKA1	chr18	46155389	18194458
chr18	65234224	65234620	NM_001039535	SKA1	chr18	46155389	19079033
chr18	65498351	65498678	NM_001039535	SKA1	chr18	46155389	19343126
chr18	66114488	66114886	NM_001039535	SKA1	chr18	46155389	19959298
chr18	66240289	66240697	NM_001039535	SKA1	chr18	46155389	20085104
chr18	66799615	66800012	NM_001039535	SKA1	chr18	46155389	20644425
chr18	66814466	66814862	NM_001039535	SKA1	chr18	46155389	20659275
chr18	70169576	70169964	NM_001039535	SKA1	chr18	46155389	24014381
chr18	70207342	70207735	NM_001039535	SKA1	chr18	46155389	24052150
chr18	70243431	70243634	NM_001039535	SKA1	chr18	46155389	24088144
chr18	70472157	70472838	NM_001039535	SKA1	chr18	46155389	24317109
chr18	70681453	70681819	NM_001039535	SKA1	chr18	46155389	24526247
chr18	70698859	70699262	NM_001039535	SKA1	chr18	46155389	24543672
chr18	70739850	70740259	NM_001039535	SKA1	chr18	46155389	24584666
chr18	70911933	70912295	NM_001039535	SKA1	chr18	46155389	24756725
chr18	71071030	71071450	NM_001039535	SKA1	chr18	46155389	24915851
chr18	71079683	71080047	NM_001039535	SKA1	chr18	46155389	24924476
chr18	71121534	71121744	NM_001039535	SKA1	chr18	46155389	24966250
chr18	72896200	72896452	NM_001039535	SKA1	chr18	46155389	26740937
chr18	72955670	72956057	NM_001039535	SKA1	chr18	46155389	26800475
chr18	73782819	73783700	NM_001039535	SKA1	chr18	46155389	27627871
chr18	74722141	74722445	NM_001039535	SKA1	chr18	46155389	28566904
chr18	75462171	75462561	NM_001039535	SKA1	chr18	46155389	29306977
chr2	157054289	157054755	NM_001039724	NOSTRIN	chr2	169367345	12312823
chr2	157483725	157484129	NM_001039724	NOSTRIN	chr2	169367345	11883418
chr2	157747121	157747459	NM_001039724	NOSTRIN	chr2	169367345	11620055
chr2	158124521	158125042	NM_001039724	NOSTRIN	chr2	169367345	11242563
chr2	159164919	159165318	NM_001039724	NOSTRIN	chr2	169367345	10202226
chr2	159232340	159232669	NM_001039724	NOSTRIN	chr2	169367345	10134840
chr2	159280759	159281236	NM_001039724	NOSTRIN	chr2	169367345	10086347
chr2	159478854	159479233	NM_001039724	NOSTRIN	chr2	169367345	9888301
chr2	159501867	159502168	NM_001039724	NOSTRIN	chr2	169367345	9865327
chr2	159535265	159535734	NM_001039724	NOSTRIN	chr2	169367345	9831845
chr2	159595512	159595742	NM_001039724	NOSTRIN	chr2	169367345	9771718
chr2	159663939	159664192	NM_001039724	NOSTRIN	chr2	169367345	9703279
chr2	159690166	159690536	NM_001039724	NOSTRIN	chr2	169367345	9676994
chr2	159749855	159750272	NM_001039724	NOSTRIN	chr2	169367345	9617281
chr2	159753212	159753601	NM_001039724	NOSTRIN	chr2	169367345	9613938
chr2	160061966	160062357	NM_001039724	NOSTRIN	chr2	169367345	9305183
chr2	160468163	160468625	NM_001039724	NOSTRIN	chr2	169367345	8898951
chr2	160604283	160604678	NM_001039724	NOSTRIN	chr2	169367345	8762864
chr2	160772923	160773174	NM_001039724	NOSTRIN	chr2	169367345	8594296
chr2	160806250	160806989	NM_001039724	NOSTRIN	chr2	169367345	8560725
chr2	160897114	160897484	NM_001039724	NOSTRIN	chr2	169367345	8470046
chr2	160936352	160936745	NM_001039724	NOSTRIN	chr2	169367345	8430796
chr2	160940570	160940941	NM_001039724	NOSTRIN	chr2	169367345	8426589
chr2	160945351	160945739	NM_001039724	NOSTRIN	chr2	169367345	8421800
chr2	160990871	160991265	NM_001039724	NOSTRIN	chr2	169367345	8376277
chr2	160992860	160993248	NM_001039724	NOSTRIN	chr2	169367345	8374291
chr2	161196031	161196431	NM_001039724	NOSTRIN	chr2	169367345	8171114
chr2	161197391	161197720	NM_001039724	NOSTRIN	chr2	169367345	8169789
chr2	161519440	161519942	NM_001039724	NOSTRIN	chr2	169367345	7847654
chr2	161642042	161642817	NM_001039724	NOSTRIN	chr2	169367345	7724915
chr2	161725547	161725989	NM_001039724	NOSTRIN	chr2	169367345	7641577
chr2	161843671	161843836	NM_001039724	NOSTRIN	chr2	169367345	7523591
chr2	162053123	162053510	NM_001039724	NOSTRIN	chr2	169367345	7314028
chr2	162205242	162205446	NM_001039724	NOSTRIN	chr2	169367345	7162001
chr2	162537686	162538040	NM_001039724	NOSTRIN	chr2	169367345	6829482
chr2	162625427	162625950	NM_001039724	NOSTRIN	chr2	169367345	6741656
chr2	162635107	162635535	NM_001039724	NOSTRIN	chr2	169367345	6732024
chr2	162657623	162658036	NM_001039724	NOSTRIN	chr2	169367345	6709515
chr2	162690891	162691292	NM_001039724	NOSTRIN	chr2	169367345	6676253
chr2	162721568	162721990	NM_001039724	NOSTRIN	chr2	169367345	6645566
chr2	162826402	162826764	NM_001039724	NOSTRIN	chr2	169367345	6540762
chr2	163913801	163914184	NM_001039724	NOSTRIN	chr2	169367345	5453352
chr2	164232428	164232760	NM_001039724	NOSTRIN	chr2	169367345	5134751
chr2	164314418	164314798	NM_001039724	NOSTRIN	chr2	169367345	5052737
chr2	164597842	164598228	NM_001039724	NOSTRIN	chr2	169367345	4769310
chr2	164793414	164793624	NM_001039724	NOSTRIN	chr2	169367345	4573826
chr2	164809642	164809917	NM_001039724	NOSTRIN	chr2	169367345	4557565
chr2	164851552	164852218	NM_001039724	NOSTRIN	chr2	169367345	4515460
chr2	164953188	164953593	NM_001039724	NOSTRIN	chr2	169367345	4413954
chr2	165127979	165128349	NM_001039724	NOSTRIN	chr2	169367345	4239181
chr2	165162636	165163149	NM_001039724	NOSTRIN	chr2	169367345	4204452
chr2	165545329	165545713	NM_001039724	NOSTRIN	chr2	169367345	3821824
chr2	165972998	165973377	NM_001039724	NOSTRIN	chr2	169367345	3394157
chr2	166017137	166017333	NM_001039724	NOSTRIN	chr2	169367345	3350110
chr2	166101589	166101978	NM_001039724	NOSTRIN	chr2	169367345	3265561
chr2	166166226	166166627	NM_001039724	NOSTRIN	chr2	169367345	3200918
chr2	166175403	166175631	NM_001039724	NOSTRIN	chr2	169367345	3191828
chr2	166195159	166195519	NM_001039724	NOSTRIN	chr2	169367345	3172006
chr2	166255471	166255923	NM_001039724	NOSTRIN	chr2	169367345	3111648
chr2	166379130	166379571	NM_001039724	NOSTRIN	chr2	169367345	2987994
chr2	166518654	166519051	NM_001039724	NOSTRIN	chr2	169367345	2848492
chr2	166631948	166632352	NM_001039724	NOSTRIN	chr2	169367345	2735195
chr2	166637390	166637763	NM_001039724	NOSTRIN	chr2	169367345	2729768
chr2	166653384	166653747	NM_001039724	NOSTRIN	chr2	169367345	2713779
chr2	166953240	166953680	NM_001039724	NOSTRIN	chr2	169367345	2413885
chr2	167323649	167323911	NM_001039724	NOSTRIN	chr2	169367345	2043565
chr2	167687177	167687472	NM_001039724	NOSTRIN	chr2	169367345	1680020
chr2	167700355	167700911	NM_001039724	NOSTRIN	chr2	169367345	1666712
chr2	168678764	168679315	NM_001039724	NOSTRIN	chr2	169367345	688305
chr2	168757794	168758197	NM_001039724	NOSTRIN	chr2	169367345	609349
chr2	168774638	168774868	NM_001039724	NOSTRIN	chr2	169367345	592592
chr2	168935815	168936445	NM_001039724	NOSTRIN	chr2	169367345	431215
chr2	169004366	169004727	NM_001039724	NOSTRIN	chr2	169367345	362798
chr2	169135785	169136184	NM_001039724	NOSTRIN	chr2	169367345	231360
chr2	169287293	169287772	NM_001039724	NOSTRIN	chr2	169367345	79812
chr2	169321963	169322353	NM_001039724	NOSTRIN	chr2	169367345	45187
chr2	169361452	169361747	NM_001039724	NOSTRIN	chr2	169367345	5745
chr2	169363138	169363625	NM_001039724	NOSTRIN	chr2	169367345	3963
chr2	169558343	169558676	NM_001039724	NOSTRIN	chr2	169367345	191165
chr2	169675646	169676030	NM_001039724	NOSTRIN	chr2	169367345	308493
chr2	169681842	169682276	NM_001039724	NOSTRIN	chr2	169367345	314714
chr2	169898084	169898441	NM_001039724	NOSTRIN	chr2	169367345	530918
chr2	169984969	169985454	NM_001039724	NOSTRIN	chr2	169367345	617867
chr2	170638025	170638411	NM_001039724	NOSTRIN	chr2	169367345	1270873
chr2	170719896	170720268	NM_001039724	NOSTRIN	chr2	169367345	1352737
chr2	170812727	170813140	NM_001039724	NOSTRIN	chr2	169367345	1445589
chr2	170915659	170916051	NM_001039724	NOSTRIN	chr2	169367345	1548510
chr2	170919567	170919848	NM_001039724	NOSTRIN	chr2	169367345	1552363
chr2	171064497	171064873	NM_001039724	NOSTRIN	chr2	169367345	1697340
chr2	171068707	171069085	NM_001039724	NOSTRIN	chr2	169367345	1701551
chr2	171968997	171969388	NM_001039724	NOSTRIN	chr2	169367345	2601848
chr2	172198357	172198670	NM_001039724	NOSTRIN	chr2	169367345	2831169
chr2	172222123	172222507	NM_001039724	NOSTRIN	chr2	169367345	2854970
chr2	172236661	172237039	NM_001039724	NOSTRIN	chr2	169367345	2869505
chr2	172625217	172625703	NM_001039724	NOSTRIN	chr2	169367345	3258115
chr2	172826173	172826548	NM_001039724	NOSTRIN	chr2	169367345	3459016
chr2	172858660	172859129	NM_001039724	NOSTRIN	chr2	169367345	3491550
chr2	172860611	172861197	NM_001039724	NOSTRIN	chr2	169367345	3493559
chr2	172880863	172881276	NM_001039724	NOSTRIN	chr2	169367345	3513725
chr2	172884898	172885285	NM_001039724	NOSTRIN	chr2	169367345	3517747
chr2	172953472	172953884	NM_001039724	NOSTRIN	chr2	169367345	3586333
chr2	172968413	172968863	NM_001039724	NOSTRIN	chr2	169367345	3601293
chr2	173316168	173316551	NM_001039724	NOSTRIN	chr2	169367345	3949015
chr2	173409262	173409801	NM_001039724	NOSTRIN	chr2	169367345	4042187
chr2	173504475	173504865	NM_001039724	NOSTRIN	chr2	169367345	4137325
chr2	173535772	173536152	NM_001039724	NOSTRIN	chr2	169367345	4168617
chr2	174151393	174151759	NM_001039724	NOSTRIN	chr2	169367345	4784231
chr2	174161970	174162213	NM_001039724	NOSTRIN	chr2	169367345	4794747
chr2	174249431	174249801	NM_001039724	NOSTRIN	chr2	169367345	4882271
chr2	174251127	174251601	NM_001039724	NOSTRIN	chr2	169367345	4884019
chr2	174364540	174364938	NM_001039724	NOSTRIN	chr2	169367345	4997394
chr2	174612386	174613253	NM_001039724	NOSTRIN	chr2	169367345	5245475
chr2	174816800	174817216	NM_001039724	NOSTRIN	chr2	169367345	5449663
chr2	174929277	174929764	NM_001039724	NOSTRIN	chr2	169367345	5562176
chr2	175027203	175028121	NM_001039724	NOSTRIN	chr2	169367345	5660317
chr2	175166499	175166913	NM_001039724	NOSTRIN	chr2	169367345	5799361
chr2	175170500	175170954	NM_001039724	NOSTRIN	chr2	169367345	5803382
chr2	175259870	175260244	NM_001039724	NOSTRIN	chr2	169367345	5892712
chr2	175336413	175336792	NM_001039724	NOSTRIN	chr2	169367345	5969258
chr2	175571401	175571787	NM_001039724	NOSTRIN	chr2	169367345	6204249
chr2	175946206	175946603	NM_001039724	NOSTRIN	chr2	169367345	6579060
chr2	175949134	175949471	NM_001039724	NOSTRIN	chr2	169367345	6581958
chr2	175975992	175976507	NM_001039724	NOSTRIN	chr2	169367345	6608905
chr2	175976727	175977106	NM_001039724	NOSTRIN	chr2	169367345	6609572
chr2	176314013	176314377	NM_001039724	NOSTRIN	chr2	169367345	6946850
chr2	176817631	176818107	NM_001039724	NOSTRIN	chr2	169367345	7450524
chr2	176992553	176992938	NM_001039724	NOSTRIN	chr2	169367345	7625401
chr2	177028825	177029252	NM_001039724	NOSTRIN	chr2	169367345	7661694
chr2	177091759	177092090	NM_001039724	NOSTRIN	chr2	169367345	7724580
chr2	177106789	177107197	NM_001039724	NOSTRIN	chr2	169367345	7739648
chr2	177122573	177123139	NM_001039724	NOSTRIN	chr2	169367345	7755511
chr2	177139127	177139502	NM_001039724	NOSTRIN	chr2	169367345	7771970
chr2	177156495	177156965	NM_001039724	NOSTRIN	chr2	169367345	7789385
chr2	177216777	177217021	NM_001039724	NOSTRIN	chr2	169367345	7849554
chr2	177229368	177229493	NM_001039724	NOSTRIN	chr2	169367345	7862086
chr2	177282447	177282911	NM_001039724	NOSTRIN	chr2	169367345	7915334
chr2	177354537	177354940	NM_001039724	NOSTRIN	chr2	169367345	7987394
chr2	177716361	177716725	NM_001039724	NOSTRIN	chr2	169367345	8349198
chr2	177812862	177813568	NM_001039724	NOSTRIN	chr2	169367345	8445870
chr2	177886129	177886502	NM_001039724	NOSTRIN	chr2	169367345	8518971
chr2	178198699	178199082	NM_001039724	NOSTRIN	chr2	169367345	8831546
chr2	178287691	178288076	NM_001039724	NOSTRIN	chr2	169367345	8920539
chr2	178319264	178319681	NM_001039724	NOSTRIN	chr2	169367345	8952128
chr2	178324162	178324469	NM_001039724	NOSTRIN	chr2	169367345	8956971
chr2	178481060	178481456	NM_001039724	NOSTRIN	chr2	169367345	9113913
chr2	178512299	178512746	NM_001039724	NOSTRIN	chr2	169367345	9145178
chr2	178864531	178864887	NM_001039724	NOSTRIN	chr2	169367345	9497364
chr2	179443687	179444070	NM_001039724	NOSTRIN	chr2	169367345	10076534
chr2	179455684	179456096	NM_001039724	NOSTRIN	chr2	169367345	10088545
chr10	13795009	13795391	NM_001039844	ACBD7	chr10	15170781	1375581
chr10	13856237	13856830	NM_001039844	ACBD7	chr10	15170781	1314247
chr10	13869041	13869438	NM_001039844	ACBD7	chr10	15170781	1301541
chr10	13948152	13948568	NM_001039844	ACBD7	chr10	15170781	1222421
chr10	13960645	13961015	NM_001039844	ACBD7	chr10	15170781	1209951
chr10	13963996	13964603	NM_001039844	ACBD7	chr10	15170781	1206481
chr10	13976433	13976886	NM_001039844	ACBD7	chr10	15170781	1194121
chr10	14027705	14028085	NM_001039844	ACBD7	chr10	15170781	1142886
chr10	14066528	14066870	NM_001039844	ACBD7	chr10	15170781	1104082
chr10	14072254	14072812	NM_001039844	ACBD7	chr10	15170781	1098248
chr10	14193723	14194121	NM_001039844	ACBD7	chr10	15170781	976859
chr10	14263260	14263649	NM_001039844	ACBD7	chr10	15170781	907326
chr10	14409681	14410119	NM_001039844	ACBD7	chr10	15170781	760881
chr10	14491845	14492178	NM_001039844	ACBD7	chr10	15170781	678769
chr10	14571782	14572448	NM_001039844	ACBD7	chr10	15170781	598666
chr10	14589149	14589637	NM_001039844	ACBD7	chr10	15170781	581388
chr10	14660400	14660790	NM_001039844	ACBD7	chr10	15170781	510186
chr10	14691908	14692276	NM_001039844	ACBD7	chr10	15170781	478689
chr10	14699093	14699560	NM_001039844	ACBD7	chr10	15170781	471454
chr10	14864707	14865199	NM_001039844	ACBD7	chr10	15170781	305828
chr10	15218293	15218673	NM_001039844	ACBD7	chr10	15170781	47702
chr10	15228312	15228763	NM_001039844	ACBD7	chr10	15170781	57757
chr10	15277515	15278091	NM_001039844	ACBD7	chr10	15170781	107022
chr10	15395906	15396290	NM_001039844	ACBD7	chr10	15170781	225317
chr10	15407636	15408014	NM_001039844	ACBD7	chr10	15170781	237044
chr17	34908541	34908866	NM_001042471	GSDMB	chr17	35328429	419725
chr17	34951458	34951888	NM_001042471	GSDMB	chr17	35328429	376756
chr17	35190661	35191175	NM_001042471	GSDMB	chr17	35328429	137511
chr17	35214657	35215059	NM_001042471	GSDMB	chr17	35328429	113571
chr1	27988584	27988989	NM_001048194	RCC1	chr1	28717331	728544
chr1	28311714	28312128	NM_001048194	RCC1	chr1	28717331	405410
chr1	28360070	28360549	NM_001048194	RCC1	chr1	28717331	357021
chr1	28969797	28970180	NM_001048194	RCC1	chr1	28717331	252658
chr1	29189301	29189531	NM_001048194	RCC1	chr1	28717331	472085
chr1	29583112	29583509	NM_001048194	RCC1	chr1	28717331	865980
chr1	29594910	29595325	NM_001048194	RCC1	chr1	28717331	877787
chr1	29808990	29809384	NM_001048194	RCC1	chr1	28717331	1091856
chr1	29836262	29836629	NM_001048194	RCC1	chr1	28717331	1119115
chr1	29890027	29890524	NM_001048194	RCC1	chr1	28717331	1172945
chr1	29933966	29934405	NM_001048194	RCC1	chr1	28717331	1216855
chr1	29953777	29954065	NM_001048194	RCC1	chr1	28717331	1236590
chr1	29954876	29955269	NM_001048194	RCC1	chr1	28717331	1237742
chr1	29957323	29957806	NM_001048194	RCC1	chr1	28717331	1240234
chr1	30120895	30121271	NM_001048194	RCC1	chr1	28717331	1403752
chr1	1186102	1186494	NM_001066	TNFRSF1B	chr1	12149646	10963348
chr1	1701632	1701983	NM_001066	TNFRSF1B	chr1	12149646	10447838
chr1	1849460	1849585	NM_001066	TNFRSF1B	chr1	12149646	10300123
chr1	2069995	2070369	NM_001066	TNFRSF1B	chr1	12149646	10079464
chr1	2177010	2177360	NM_001066	TNFRSF1B	chr1	12149646	9972461
chr1	2503103	2503430	NM_001066	TNFRSF1B	chr1	12149646	9646379
chr1	3487711	3488120	NM_001066	TNFRSF1B	chr1	12149646	8661730
chr1	6475725	6476119	NM_001066	TNFRSF1B	chr1	12149646	5673724
chr1	6489709	6490136	NM_001066	TNFRSF1B	chr1	12149646	5659723
chr1	6889447	6889770	NM_001066	TNFRSF1B	chr1	12149646	5260037
chr1	6918149	6918407	NM_001066	TNFRSF1B	chr1	12149646	5231368
chr1	6978848	6979218	NM_001066	TNFRSF1B	chr1	12149646	5170613
chr1	7362007	7362416	NM_001066	TNFRSF1B	chr1	12149646	4787434
chr1	7531917	7532315	NM_001066	TNFRSF1B	chr1	12149646	4617530
chr1	7576825	7577155	NM_001066	TNFRSF1B	chr1	12149646	4572656
chr1	7709249	7709681	NM_001066	TNFRSF1B	chr1	12149646	4440181
chr1	7727502	7727896	NM_001066	TNFRSF1B	chr1	12149646	4421947
chr1	7839727	7839956	NM_001066	TNFRSF1B	chr1	12149646	4309804
chr1	7988198	7988462	NM_001066	TNFRSF1B	chr1	12149646	4161316
chr1	8015709	8016425	NM_001066	TNFRSF1B	chr1	12149646	4133579
chr1	8040379	8040818	NM_001066	TNFRSF1B	chr1	12149646	4109047
chr1	8059712	8060255	NM_001066	TNFRSF1B	chr1	12149646	4089662
chr1	8180301	8180684	NM_001066	TNFRSF1B	chr1	12149646	3969153
chr1	8194602	8195001	NM_001066	TNFRSF1B	chr1	12149646	3954844
chr1	8224390	8224709	NM_001066	TNFRSF1B	chr1	12149646	3925096
chr1	8243815	8244176	NM_001066	TNFRSF1B	chr1	12149646	3905650
chr1	8291168	8291470	NM_001066	TNFRSF1B	chr1	12149646	3858327
chr1	8297643	8298079	NM_001066	TNFRSF1B	chr1	12149646	3851785
chr1	8377632	8378034	NM_001066	TNFRSF1B	chr1	12149646	3771813
chr1	8587092	8587331	NM_001066	TNFRSF1B	chr1	12149646	3562434
chr1	8650868	8651242	NM_001066	TNFRSF1B	chr1	12149646	3498591
chr1	8805251	8805813	NM_001066	TNFRSF1B	chr1	12149646	3344114
chr1	8840713	8841120	NM_001066	TNFRSF1B	chr1	12149646	3308729
chr1	8929823	8930220	NM_001066	TNFRSF1B	chr1	12149646	3219624
chr1	8957352	8957737	NM_001066	TNFRSF1B	chr1	12149646	3192101
chr1	8999108	8999489	NM_001066	TNFRSF1B	chr1	12149646	3150347
chr1	9193923	9194172	NM_001066	TNFRSF1B	chr1	12149646	2955598
chr1	9222260	9222730	NM_001066	TNFRSF1B	chr1	12149646	2927151
chr1	9384546	9384784	NM_001066	TNFRSF1B	chr1	12149646	2764981
chr1	9873939	9874343	NM_001066	TNFRSF1B	chr1	12149646	2275505
chr1	10493528	10493856	NM_001066	TNFRSF1B	chr1	12149646	1655954
chr1	10952605	10952976	NM_001066	TNFRSF1B	chr1	12149646	1196855
chr1	10962140	10962478	NM_001066	TNFRSF1B	chr1	12149646	1187337
chr1	10963985	10964449	NM_001066	TNFRSF1B	chr1	12149646	1185429
chr1	10970521	10970935	NM_001066	TNFRSF1B	chr1	12149646	1178918
chr1	10974703	10974812	NM_001066	TNFRSF1B	chr1	12149646	1174888
chr1	11138937	11139357	NM_001066	TNFRSF1B	chr1	12149646	1010499
chr1	11332684	11333351	NM_001066	TNFRSF1B	chr1	12149646	816628
chr1	11615074	11615288	NM_001066	TNFRSF1B	chr1	12149646	534465
chr1	11712993	11713399	NM_001066	TNFRSF1B	chr1	12149646	436450
chr1	11723523	11723834	NM_001066	TNFRSF1B	chr1	12149646	425967
chr1	11968481	11969208	NM_001066	TNFRSF1B	chr1	12149646	180801
chr1	12126037	12126839	NM_001066	TNFRSF1B	chr1	12149646	23208
chr1	12158143	12158563	NM_001066	TNFRSF1B	chr1	12149646	8707
chr1	12293257	12293583	NM_001066	TNFRSF1B	chr1	12149646	143774
chr1	12463382	12463762	NM_001066	TNFRSF1B	chr1	12149646	313926
chr1	12493005	12493375	NM_001066	TNFRSF1B	chr1	12149646	343544
chr1	12527588	12527971	NM_001066	TNFRSF1B	chr1	12149646	378134
chr1	12586979	12587354	NM_001066	TNFRSF1B	chr1	12149646	437521
chr1	12630839	12631218	NM_001066	TNFRSF1B	chr1	12149646	481383
chr6	241692	242110	NM_001080480	MBOAT1	chr6	20320649	20078748
chr6	651160	651536	NM_001080480	MBOAT1	chr6	20320649	19669301
chr6	1041884	1042365	NM_001080480	MBOAT1	chr6	20320649	19278524
chr6	1778106	1778444	NM_001080480	MBOAT1	chr6	20320649	18542374
chr6	1849391	1850375	NM_001080480	MBOAT1	chr6	20320649	18470766
chr6	1973612	1974009	NM_001080480	MBOAT1	chr6	20320649	18346838
chr6	2467782	2468155	NM_001080480	MBOAT1	chr6	20320649	17852680
chr6	2479993	2480215	NM_001080480	MBOAT1	chr6	20320649	17840545
chr6	2550360	2550724	NM_001080480	MBOAT1	chr6	20320649	17770107
chr6	2799555	2800444	NM_001080480	MBOAT1	chr6	20320649	17520649
chr6	2888368	2888923	NM_001080480	MBOAT1	chr6	20320649	17432003
chr6	2941932	2942307	NM_001080480	MBOAT1	chr6	20320649	17378529
chr6	3226860	3227353	NM_001080480	MBOAT1	chr6	20320649	17093542
chr6	3269373	3269770	NM_001080480	MBOAT1	chr6	20320649	17051077
chr6	3758330	3758768	NM_001080480	MBOAT1	chr6	20320649	16562100
chr6	3771223	3771600	NM_001080480	MBOAT1	chr6	20320649	16549237
chr6	3829249	3829624	NM_001080480	MBOAT1	chr6	20320649	16491212
chr6	3908303	3908659	NM_001080480	MBOAT1	chr6	20320649	16412168
chr6	4004397	4004779	NM_001080480	MBOAT1	chr6	20320649	16316061
chr6	4073957	4074524	NM_001080480	MBOAT1	chr6	20320649	16246408
chr6	4198201	4198580	NM_001080480	MBOAT1	chr6	20320649	16122258
chr6	4203392	4203878	NM_001080480	MBOAT1	chr6	20320649	16117014
chr6	4262185	4262537	NM_001080480	MBOAT1	chr6	20320649	16058288
chr6	4302725	4303115	NM_001080480	MBOAT1	chr6	20320649	16017729
chr6	4326650	4327012	NM_001080480	MBOAT1	chr6	20320649	15993818
chr6	4404265	4404638	NM_001080480	MBOAT1	chr6	20320649	15916197
chr6	4428015	4428408	NM_001080480	MBOAT1	chr6	20320649	15892437
chr6	4655428	4655764	NM_001080480	MBOAT1	chr6	20320649	15665053
chr6	4797341	4797598	NM_001080480	MBOAT1	chr6	20320649	15523179
chr6	4999150	4999577	NM_001080480	MBOAT1	chr6	20320649	15321285
chr6	5577620	5577899	NM_001080480	MBOAT1	chr6	20320649	14742889
chr6	5687981	5688365	NM_001080480	MBOAT1	chr6	20320649	14632476
chr6	5748432	5748829	NM_001080480	MBOAT1	chr6	20320649	14572018
chr6	5754462	5754802	NM_001080480	MBOAT1	chr6	20320649	14566017
chr6	6266103	6266608	NM_001080480	MBOAT1	chr6	20320649	14054293
chr6	6515826	6516229	NM_001080480	MBOAT1	chr6	20320649	13804621
chr6	6622096	6622679	NM_001080480	MBOAT1	chr6	20320649	13698261
chr6	6632423	6632813	NM_001080480	MBOAT1	chr6	20320649	13688031
chr6	6669378	6669763	NM_001080480	MBOAT1	chr6	20320649	13651078
chr6	6697612	6697809	NM_001080480	MBOAT1	chr6	20320649	13622938
chr6	6771780	6772211	NM_001080480	MBOAT1	chr6	20320649	13548653
chr6	6782245	6782631	NM_001080480	MBOAT1	chr6	20320649	13538211
chr6	6987529	6987885	NM_001080480	MBOAT1	chr6	20320649	13332942
chr6	7676180	7676642	NM_001080480	MBOAT1	chr6	20320649	12644238
chr6	7920224	7920802	NM_001080480	MBOAT1	chr6	20320649	12400136
chr6	7945270	7945947	NM_001080480	MBOAT1	chr6	20320649	12375040
chr6	8234936	8235310	NM_001080480	MBOAT1	chr6	20320649	12085526
chr6	8267279	8267655	NM_001080480	MBOAT1	chr6	20320649	12053182
chr6	8268035	8268381	NM_001080480	MBOAT1	chr6	20320649	12052441
chr6	8803654	8804029	NM_001080480	MBOAT1	chr6	20320649	11516807
chr6	8996566	8996966	NM_001080480	MBOAT1	chr6	20320649	11323883
chr6	9904056	9904442	NM_001080480	MBOAT1	chr6	20320649	10416400
chr6	10005069	10005446	NM_001080480	MBOAT1	chr6	20320649	10315391
chr6	10628652	10629051	NM_001080480	MBOAT1	chr6	20320649	9691797
chr6	10678050	10678364	NM_001080480	MBOAT1	chr6	20320649	9642442
chr6	11220042	11220383	NM_001080480	MBOAT1	chr6	20320649	9100436
chr6	11326923	11327306	NM_001080480	MBOAT1	chr6	20320649	8993534
chr6	11344298	11345025	NM_001080480	MBOAT1	chr6	20320649	8975987
chr6	11404694	11405071	NM_001080480	MBOAT1	chr6	20320649	8915766
chr6	11424353	11424749	NM_001080480	MBOAT1	chr6	20320649	8896098
chr6	11429179	11429555	NM_001080480	MBOAT1	chr6	20320649	8891282
chr6	11498150	11498421	NM_001080480	MBOAT1	chr6	20320649	8822363
chr6	11519202	11519689	NM_001080480	MBOAT1	chr6	20320649	8801203
chr6	11532586	11532963	NM_001080480	MBOAT1	chr6	20320649	8787874
chr6	11717668	11718327	NM_001080480	MBOAT1	chr6	20320649	8602651
chr6	11722069	11722494	NM_001080480	MBOAT1	chr6	20320649	8598367
chr6	11758456	11758794	NM_001080480	MBOAT1	chr6	20320649	8562024
chr6	11761301	11761619	NM_001080480	MBOAT1	chr6	20320649	8559189
chr6	11801219	11801646	NM_001080480	MBOAT1	chr6	20320649	8519216
chr6	12039093	12039484	NM_001080480	MBOAT1	chr6	20320649	8281360
chr6	12046787	12047179	NM_001080480	MBOAT1	chr6	20320649	8273666
chr6	12382969	12383350	NM_001080480	MBOAT1	chr6	20320649	7937489
chr6	12392496	12392882	NM_001080480	MBOAT1	chr6	20320649	7927960
chr6	12398252	12398650	NM_001080480	MBOAT1	chr6	20320649	7922198
chr6	12592020	12592445	NM_001080480	MBOAT1	chr6	20320649	7728416
chr6	12645576	12646011	NM_001080480	MBOAT1	chr6	20320649	7674855
chr6	12675877	12676281	NM_001080480	MBOAT1	chr6	20320649	7644570
chr6	12693203	12693482	NM_001080480	MBOAT1	chr6	20320649	7627306
chr6	12736635	12737007	NM_001080480	MBOAT1	chr6	20320649	7583828
chr6	12785330	12785639	NM_001080480	MBOAT1	chr6	20320649	7535164
chr6	12813118	12813511	NM_001080480	MBOAT1	chr6	20320649	7507334
chr6	13071267	13071688	NM_001080480	MBOAT1	chr6	20320649	7249171
chr6	13108647	13109016	NM_001080480	MBOAT1	chr6	20320649	7211817
chr6	13392856	13393236	NM_001080480	MBOAT1	chr6	20320649	6927603
chr6	13443106	13443554	NM_001080480	MBOAT1	chr6	20320649	6877319
chr6	13498883	13499280	NM_001080480	MBOAT1	chr6	20320649	6821567
chr6	13503472	13503953	NM_001080480	MBOAT1	chr6	20320649	6816936
chr6	13556275	13556746	NM_001080480	MBOAT1	chr6	20320649	6764138
chr6	13634930	13635200	NM_001080480	MBOAT1	chr6	20320649	6685584
chr6	13642767	13643145	NM_001080480	MBOAT1	chr6	20320649	6677693
chr6	14015953	14016191	NM_001080480	MBOAT1	chr6	20320649	6304577
chr6	14021178	14021574	NM_001080480	MBOAT1	chr6	20320649	6299273
chr6	14044095	14044419	NM_001080480	MBOAT1	chr6	20320649	6276392
chr6	14134985	14135437	NM_001080480	MBOAT1	chr6	20320649	6185438
chr6	14259563	14259780	NM_001080480	MBOAT1	chr6	20320649	6060977
chr6	14265107	14265471	NM_001080480	MBOAT1	chr6	20320649	6055360
chr6	14907362	14907744	NM_001080480	MBOAT1	chr6	20320649	5413096
chr6	14922470	14922974	NM_001080480	MBOAT1	chr6	20320649	5397927
chr6	14985307	14985722	NM_001080480	MBOAT1	chr6	20320649	5335134
chr6	14988967	14989364	NM_001080480	MBOAT1	chr6	20320649	5331483
chr6	15175076	15175518	NM_001080480	MBOAT1	chr6	20320649	5145352
chr6	15216430	15216808	NM_001080480	MBOAT1	chr6	20320649	5104030
chr6	15219810	15220129	NM_001080480	MBOAT1	chr6	20320649	5100679
chr6	15417161	15417364	NM_001080480	MBOAT1	chr6	20320649	4903386
chr6	15541437	15541828	NM_001080480	MBOAT1	chr6	20320649	4779016
chr6	15659985	15660375	NM_001080480	MBOAT1	chr6	20320649	4660469
chr6	15716646	15717050	NM_001080480	MBOAT1	chr6	20320649	4603801
chr6	15818194	15818625	NM_001080480	MBOAT1	chr6	20320649	4502239
chr6	15988171	15988551	NM_001080480	MBOAT1	chr6	20320649	4332288
chr6	16005295	16005759	NM_001080480	MBOAT1	chr6	20320649	4315122
chr6	16014056	16014438	NM_001080480	MBOAT1	chr6	20320649	4306402
chr6	16030637	16031052	NM_001080480	MBOAT1	chr6	20320649	4289804
chr6	16070526	16070886	NM_001080480	MBOAT1	chr6	20320649	4249943
chr6	16171831	16172111	NM_001080480	MBOAT1	chr6	20320649	4148678
chr6	16173000	16173423	NM_001080480	MBOAT1	chr6	20320649	4147437
chr6	16323736	16324104	NM_001080480	MBOAT1	chr6	20320649	3996729
chr6	16966428	16966664	NM_001080480	MBOAT1	chr6	20320649	3354103
chr6	17016212	17016595	NM_001080480	MBOAT1	chr6	20320649	3304245
chr6	17069528	17070278	NM_001080480	MBOAT1	chr6	20320649	3250746
chr6	17080559	17080769	NM_001080480	MBOAT1	chr6	20320649	3239985
chr6	17544193	17544409	NM_001080480	MBOAT1	chr6	20320649	2776348
chr6	17600089	17600453	NM_001080480	MBOAT1	chr6	20320649	2720378
chr6	17955175	17955839	NM_001080480	MBOAT1	chr6	20320649	2365142
chr6	17977980	17978310	NM_001080480	MBOAT1	chr6	20320649	2342504
chr6	18153857	18154209	NM_001080480	MBOAT1	chr6	20320649	2166616
chr6	18508922	18509318	NM_001080480	MBOAT1	chr6	20320649	1811529
chr6	18693300	18693831	NM_001080480	MBOAT1	chr6	20320649	1627083
chr6	18778806	18779204	NM_001080480	MBOAT1	chr6	20320649	1541644
chr6	18842355	18842721	NM_001080480	MBOAT1	chr6	20320649	1478111
chr6	20605381	20606146	NM_001080480	MBOAT1	chr6	20320649	285115
chr6	20864929	20865333	NM_001080480	MBOAT1	chr6	20320649	544482
chr6	20985535	20985887	NM_001080480	MBOAT1	chr6	20320649	665062
chr6	20987799	20988185	NM_001080480	MBOAT1	chr6	20320649	667343
chr6	21273074	21273552	NM_001080480	MBOAT1	chr6	20320649	952664
chr6	21306471	21306860	NM_001080480	MBOAT1	chr6	20320649	986017
chr6	21724239	21724619	NM_001080480	MBOAT1	chr6	20320649	1403780
chr6	21785097	21785355	NM_001080480	MBOAT1	chr6	20320649	1464577
chr6	21850584	21850993	NM_001080480	MBOAT1	chr6	20320649	1530140
chr6	21900656	21901038	NM_001080480	MBOAT1	chr6	20320649	1580198
chr6	21940205	21940623	NM_001080480	MBOAT1	chr6	20320649	1619765
chr6	21948609	21948981	NM_001080480	MBOAT1	chr6	20320649	1628146
chr6	21955404	21955759	NM_001080480	MBOAT1	chr6	20320649	1634933
chr6	22056015	22056482	NM_001080480	MBOAT1	chr6	20320649	1735600
chr6	22061881	22062371	NM_001080480	MBOAT1	chr6	20320649	1741477
chr6	22095643	22096072	NM_001080480	MBOAT1	chr6	20320649	1775209
chr6	22133835	22134222	NM_001080480	MBOAT1	chr6	20320649	1813380
chr6	22249558	22250003	NM_001080480	MBOAT1	chr6	20320649	1929132
chr6	22356117	22356508	NM_001080480	MBOAT1	chr6	20320649	2035664
chr6	22401837	22402180	NM_001080480	MBOAT1	chr6	20320649	2081360
chr6	22556531	22556979	NM_001080480	MBOAT1	chr6	20320649	2236106
chr6	22579104	22579633	NM_001080480	MBOAT1	chr6	20320649	2258720
chr19	11224668	11225005	NM_001080493	ZNF823	chr19	11710760	485923
chr19	11240614	11241032	NM_001080493	ZNF823	chr19	11710760	469937
chr19	11245157	11245290	NM_001080493	ZNF823	chr19	11710760	465536
chr19	11258178	11258453	NM_001080493	ZNF823	chr19	11710760	452444
chr19	11265315	11265689	NM_001080493	ZNF823	chr19	11710760	445258
chr19	11295940	11296353	NM_001080493	ZNF823	chr19	11710760	414613
chr19	11356241	11356613	NM_001080493	ZNF823	chr19	11710760	354333
chr19	11568476	11568792	NM_001080493	ZNF823	chr19	11710760	142126
chr2	236681525	236681935	NM_001080504	RBM44	chr2	238372126	1690396
chr2	236774327	236774762	NM_001080504	RBM44	chr2	238372126	1597581
chr2	236873869	236874258	NM_001080504	RBM44	chr2	238372126	1498062
chr2	236911855	236912256	NM_001080504	RBM44	chr2	238372126	1460070
chr2	237108303	237108701	NM_001080504	RBM44	chr2	238372126	1263624
chr2	237139899	237140276	NM_001080504	RBM44	chr2	238372126	1232038
chr2	237406859	237407270	NM_001080504	RBM44	chr2	238372126	965061
chr2	237444900	237445377	NM_001080504	RBM44	chr2	238372126	926987
chr2	237462385	237462913	NM_001080504	RBM44	chr2	238372126	909477
chr2	237541436	237541807	NM_001080504	RBM44	chr2	238372126	830504
chr2	237800947	237801452	NM_001080504	RBM44	chr2	238372126	570926
chr2	238008274	238008672	NM_001080504	RBM44	chr2	238372126	363653
chr2	238022660	238023056	NM_001080504	RBM44	chr2	238372126	349268
chr2	238038927	238039327	NM_001080504	RBM44	chr2	238372126	332999
chr2	238074315	238074739	NM_001080504	RBM44	chr2	238372126	297599
chr2	238105673	238105972	NM_001080504	RBM44	chr2	238372126	266303
chr2	238177009	238177414	NM_001080504	RBM44	chr2	238372126	194914
chr2	238190409	238190713	NM_001080504	RBM44	chr2	238372126	181565
chr2	238466613	238467057	NM_001080504	RBM44	chr2	238372126	94709
chr2	238478639	238479081	NM_001080504	RBM44	chr2	238372126	106734
chr2	238515564	238515782	NM_001080504	RBM44	chr2	238372126	143547
chr2	238526057	238526449	NM_001080504	RBM44	chr2	238372126	154127
chr12	109235177	109235550	NM_001082538	TCTN1	chr12	109536262	300898
chr12	109276299	109276679	NM_001082538	TCTN1	chr12	109536262	259773
chr12	109436169	109436408	NM_001082538	TCTN1	chr12	109536262	99973
chr12	109467404	109467793	NM_001082538	TCTN1	chr12	109536262	68663
chr12	109507400	109507778	NM_001082538	TCTN1	chr12	109536262	28673
chr12	109620742	109621143	NM_001082538	TCTN1	chr12	109536262	84681
chr12	109793447	109793852	NM_001082538	TCTN1	chr12	109536262	257388
chr12	109810947	109811064	NM_001082538	TCTN1	chr12	109536262	274744
chr12	109817414	109817923	NM_001082538	TCTN1	chr12	109536262	281407
chr12	109902362	109902752	NM_001082538	TCTN1	chr12	109536262	366295
chr12	109978928	109979718	NM_001082538	TCTN1	chr12	109536262	443061
chr12	109992407	109992828	NM_001082538	TCTN1	chr12	109536262	456356
chr9	75674003	75674423	NM_001097634	GCNT1	chr9	78246401	2572188
chr9	76574243	76574936	NM_001097634	GCNT1	chr9	78246401	1671811
chr9	76913310	76913730	NM_001097634	GCNT1	chr9	78246401	1332881
chr9	76946971	76947338	NM_001097634	GCNT1	chr9	78246401	1299246
chr9	77705580	77705969	NM_001097634	GCNT1	chr9	78246401	540626
chr9	77904312	77904670	NM_001097634	GCNT1	chr9	78246401	341910
chr9	78021019	78021526	NM_001097634	GCNT1	chr9	78246401	225128
chr9	78179924	78180304	NM_001097634	GCNT1	chr9	78246401	66287
chr9	78260985	78261371	NM_001097634	GCNT1	chr9	78246401	14777
chr9	78459786	78460396	NM_001097634	GCNT1	chr9	78246401	213690
chr9	78482302	78482712	NM_001097634	GCNT1	chr9	78246401	236106
chr9	78492691	78493120	NM_001097634	GCNT1	chr9	78246401	246505
chr9	78671276	78671861	NM_001097634	GCNT1	chr9	78246401	425168
chr17	48768336	48769116	NM_001102402	PCTP	chr17	51183354	2414628
chr17	50609500	50610173	NM_001102402	PCTP	chr17	51183354	573517
chr17	50619887	50620108	NM_001102402	PCTP	chr17	51183354	563356
chr17	50640765	50641133	NM_001102402	PCTP	chr17	51183354	542405
chr17	51013991	51014328	NM_001102402	PCTP	chr17	51183354	169194
chr17	51016251	51016703	NM_001102402	PCTP	chr17	51183354	166877
chr17	51092574	51092976	NM_001102402	PCTP	chr17	51183354	90579
chr17	51196123	51196496	NM_001102402	PCTP	chr17	51183354	12956
chr18	5445605	5446062	NM_001105244	PTPRM	chr18	7557313	2111479
chr18	5453844	5454244	NM_001105244	PTPRM	chr18	7557313	2103269
chr18	5557470	5557845	NM_001105244	PTPRM	chr18	7557313	1999655
chr18	6494577	6495031	NM_001105244	PTPRM	chr18	7557313	1062509
chr18	7263378	7264005	NM_001105244	PTPRM	chr18	7557313	293621
chr18	7280727	7281377	NM_001105244	PTPRM	chr18	7557313	276261
chr18	7314215	7314529	NM_001105244	PTPRM	chr18	7557313	242941
chr18	7358980	7359437	NM_001105244	PTPRM	chr18	7557313	198104
chr18	7360877	7361268	NM_001105244	PTPRM	chr18	7557313	196240
chr18	7616898	7617398	NM_001105244	PTPRM	chr18	7557313	59835
chr18	7668807	7669198	NM_001105244	PTPRM	chr18	7557313	111690
chr18	7738640	7739008	NM_001105244	PTPRM	chr18	7557313	181511
chr18	7762319	7762702	NM_001105244	PTPRM	chr18	7557313	205198
chr18	8533052	8533162	NM_001105244	PTPRM	chr18	7557313	975794
chr18	8720387	8720757	NM_001105244	PTPRM	chr18	7557313	1163259
chr18	9012848	9013228	NM_001105244	PTPRM	chr18	7557313	1455725
chr18	9310974	9311342	NM_001105244	PTPRM	chr18	7557313	1753845
chr18	9394422	9394854	NM_001105244	PTPRM	chr18	7557313	1837325
chr18	9475911	9476519	NM_001105244	PTPRM	chr18	7557313	1918902
chr18	9561642	9562044	NM_001105244	PTPRM	chr18	7557313	2004530
chr18	9650674	9650865	NM_001105244	PTPRM	chr18	7557313	2093457
chr12	111245999	111246382	NM_001109662	C12orf51	chr12	111228421	17770
chr12	111459861	111460204	NM_001109662	C12orf51	chr12	111228421	231612
chr12	111549918	111550389	NM_001109662	C12orf51	chr12	111228421	321733
chr12	111720026	111720519	NM_001109662	C12orf51	chr12	111228421	491852
chr12	111761515	111761862	NM_001109662	C12orf51	chr12	111228421	533268
chr12	111824538	111824956	NM_001109662	C12orf51	chr12	111228421	596326
chr12	111893550	111893946	NM_001109662	C12orf51	chr12	111228421	665327
chr12	112137017	112137667	NM_001109662	C12orf51	chr12	111228421	908921
chr12	112160139	112160429	NM_001109662	C12orf51	chr12	111228421	931863
chr12	112251356	112251748	NM_001109662	C12orf51	chr12	111228421	1023131
chr12	112318722	112318879	NM_001109662	C12orf51	chr12	111228421	1090380
chr12	112596295	112596480	NM_001109662	C12orf51	chr12	111228421	1367967
chr12	112703762	112704270	NM_001109662	C12orf51	chr12	111228421	1475595
chr12	112710457	112710730	NM_001109662	C12orf51	chr12	111228421	1482173
chr12	113559807	113560171	NM_001109662	C12orf51	chr12	111228421	2331568
chr12	113578246	113578649	NM_001109662	C12orf51	chr12	111228421	2350027
chr12	115281315	115281679	NM_001109662	C12orf51	chr12	111228421	4053076
chr12	115402189	115402637	NM_001109662	C12orf51	chr12	111228421	4173992
chr12	115569070	115569342	NM_001109662	C12orf51	chr12	111228421	4340785
chr12	115648930	115649292	NM_001109662	C12orf51	chr12	111228421	4420690
chr12	115659477	115659999	NM_001109662	C12orf51	chr12	111228421	4431317
chr12	115992358	115992818	NM_001109662	C12orf51	chr12	111228421	4764167
chr12	116043647	116044032	NM_001109662	C12orf51	chr12	111228421	4815419
chr12	116264997	116265211	NM_001109662	C12orf51	chr12	111228421	5036683
chr12	116382377	116382988	NM_001109662	C12orf51	chr12	111228421	5154262
chr12	116584895	116585256	NM_001109662	C12orf51	chr12	111228421	5356655
chr12	116607234	116607751	NM_001109662	C12orf51	chr12	111228421	5379072
chr12	116609193	116609570	NM_001109662	C12orf51	chr12	111228421	5380961
chr12	101333297	101333666	NM_001111283	IGF1	chr12	101398508	65026
chr12	101354744	101355184	NM_001111283	IGF1	chr12	101398508	43544
chr12	101454064	101454371	NM_001111283	IGF1	chr12	101398508	55710
chr12	101622002	101622405	NM_001111283	IGF1	chr12	101398508	223696
chr12	101704739	101705150	NM_001111283	IGF1	chr12	101398508	306437
chr12	102497982	102498362	NM_001111283	IGF1	chr12	101398508	1099664
chr12	102798593	102799068	NM_001111283	IGF1	chr12	101398508	1400323
chr12	103137869	103138282	NM_001111283	IGF1	chr12	101398508	1739568
chr12	103398740	103399138	NM_001111283	IGF1	chr12	101398508	2000431
chr12	103437167	103437524	NM_001111283	IGF1	chr12	101398508	2038838
chr12	103452107	103452750	NM_001111283	IGF1	chr12	101398508	2053921
chr12	103521968	103522478	NM_001111283	IGF1	chr12	101398508	2123715
chr12	103589631	103589977	NM_001111283	IGF1	chr12	101398508	2191296
chr12	103647053	103647420	NM_001111283	IGF1	chr12	101398508	2248729
chr12	104027303	104028032	NM_001111283	IGF1	chr12	101398508	2629160
chr12	104154025	104154413	NM_001111283	IGF1	chr12	101398508	2755711
chr12	104304243	104304559	NM_001111283	IGF1	chr12	101398508	2905893
chr12	104327926	104328271	NM_001111283	IGF1	chr12	101398508	2929591
chr12	104403217	104403596	NM_001111283	IGF1	chr12	101398508	3004899
chr6	44765900	44766120	NM_001114086	CLIC5	chr6	46156044	1390034
chr6	44800824	44801204	NM_001114086	CLIC5	chr6	46156044	1355030
chr6	45521509	45521790	NM_001114086	CLIC5	chr6	46156044	634394
chr6	45726294	45726717	NM_001114086	CLIC5	chr6	46156044	429538
chr6	45753201	45753580	NM_001114086	CLIC5	chr6	46156044	402653
chr6	46120956	46121350	NM_001114086	CLIC5	chr6	46156044	34891
chr6	46391261	46391668	NM_001114086	CLIC5	chr6	46156044	235421
chr6	46951813	46952246	NM_001114086	CLIC5	chr6	46156044	795986
chr6	47011373	47011774	NM_001114086	CLIC5	chr6	46156044	855530
chr6	47023179	47023548	NM_001114086	CLIC5	chr6	46156044	867320
chr6	47024436	47024832	NM_001114086	CLIC5	chr6	46156044	868590
chr6	47123080	47123458	NM_001114086	CLIC5	chr6	46156044	967225
chr6	47137318	47137700	NM_001114086	CLIC5	chr6	46156044	981465
chr6	47210168	47210771	NM_001114086	CLIC5	chr6	46156044	1054426
chr6	47771612	47771993	NM_001114086	CLIC5	chr6	46156044	1615759
chr6	48009702	48010110	NM_001114086	CLIC5	chr6	46156044	1853862
chr6	48174582	48175200	NM_001114086	CLIC5	chr6	46156044	2018847
chr6	48611164	48611534	NM_001114086	CLIC5	chr6	46156044	2455305
chr6	49148429	49148802	NM_001114086	CLIC5	chr6	46156044	2992572
chr6	49641566	49641953	NM_001114086	CLIC5	chr6	46156044	3485716
chr6	49648163	49648363	NM_001114086	CLIC5	chr6	46156044	3492219
chr6	50977933	50978335	NM_001114086	CLIC5	chr6	46156044	4822090
chr6	51046474	51046912	NM_001114086	CLIC5	chr6	46156044	4890649
chr6	51104400	51104911	NM_001114086	CLIC5	chr6	46156044	4948612
chr6	51867108	51867417	NM_001114086	CLIC5	chr6	46156044	5711219
chr6	52036227	52037071	NM_001114086	CLIC5	chr6	46156044	5880605
chr6	52088343	52088712	NM_001114086	CLIC5	chr6	46156044	5932484
chr6	52128790	52129288	NM_001114086	CLIC5	chr6	46156044	5972995
chr6	52389646	52390077	NM_001114086	CLIC5	chr6	46156044	6233818
chr6	52392228	52392576	NM_001114086	CLIC5	chr6	46156044	6236358
chr6	52462518	52462955	NM_001114086	CLIC5	chr6	46156044	6306693
chr6	52495416	52495803	NM_001114086	CLIC5	chr6	46156044	6339566
chr6	52516786	52517128	NM_001114086	CLIC5	chr6	46156044	6360913
chr6	52541095	52541488	NM_001114086	CLIC5	chr6	46156044	6385248
chr6	53170278	53170903	NM_001114086	CLIC5	chr6	46156044	7014547
chr6	53679304	53679692	NM_001114086	CLIC5	chr6	46156044	7523454
chr6	53829984	53831053	NM_001114086	CLIC5	chr6	46156044	7674475
chr6	53956961	53957326	NM_001114086	CLIC5	chr6	46156044	7801100
chr6	54040638	54040837	NM_001114086	CLIC5	chr6	46156044	7884694
chr6	54227409	54227541	NM_001114086	CLIC5	chr6	46156044	8071431
chr6	54263924	54264314	NM_001114086	CLIC5	chr6	46156044	8108075
chr6	54308555	54308938	NM_001114086	CLIC5	chr6	46156044	8152703
chr6	54438519	54438775	NM_001114086	CLIC5	chr6	46156044	8282603
chr6	54620022	54620414	NM_001114086	CLIC5	chr6	46156044	8464174
chr6	55814736	55815713	NM_001114086	CLIC5	chr6	46156044	9659181
chr6	55921865	55922282	NM_001114086	CLIC5	chr6	46156044	9766030
chr6	55985294	55985949	NM_001114086	CLIC5	chr6	46156044	9829578
chr6	56019273	56019698	NM_001114086	CLIC5	chr6	46156044	9863442
chr6	56233268	56233644	NM_001114086	CLIC5	chr6	46156044	10077412
chr6	56265187	56265547	NM_001114086	CLIC5	chr6	46156044	10109323
chr6	56301904	56302581	NM_001114086	CLIC5	chr6	46156044	10146199
chr6	56334611	56334993	NM_001114086	CLIC5	chr6	46156044	10178758
chr6	56687767	56688151	NM_001114086	CLIC5	chr6	46156044	10531915
chr15	75575244	75575543	NM_001114735	BCL2A1	chr15	78050698	2475304
chr15	75585987	75586383	NM_001114735	BCL2A1	chr15	78050698	2464513
chr15	75588472	75588835	NM_001114735	BCL2A1	chr15	78050698	2462044
chr15	75816717	75817141	NM_001114735	BCL2A1	chr15	78050698	2233769
chr15	75818021	75818237	NM_001114735	BCL2A1	chr15	78050698	2232569
chr15	75855751	75855972	NM_001114735	BCL2A1	chr15	78050698	2194836
chr15	76069876	76070222	NM_001114735	BCL2A1	chr15	78050698	1980649
chr15	76114804	76115188	NM_001114735	BCL2A1	chr15	78050698	1935702
chr15	76144682	76145073	NM_001114735	BCL2A1	chr15	78050698	1905820
chr15	76183310	76183684	NM_001114735	BCL2A1	chr15	78050698	1867201
chr15	76185381	76185755	NM_001114735	BCL2A1	chr15	78050698	1865130
chr15	76835976	76836360	NM_001114735	BCL2A1	chr15	78050698	1214530
chr15	76840887	76841336	NM_001114735	BCL2A1	chr15	78050698	1209586
chr15	77016527	77016916	NM_001114735	BCL2A1	chr15	78050698	1033976
chr15	77083843	77084207	NM_001114735	BCL2A1	chr15	78050698	966673
chr15	77242845	77243262	NM_001114735	BCL2A1	chr15	78050698	807644
chr15	77402304	77402686	NM_001114735	BCL2A1	chr15	78050698	648203
chr15	77760126	77760492	NM_001114735	BCL2A1	chr15	78050698	290389
chr15	78008872	78009245	NM_001114735	BCL2A1	chr15	78050698	41639
chr15	78112951	78113325	NM_001114735	BCL2A1	chr15	78050698	62440
chr15	78121474	78121840	NM_001114735	BCL2A1	chr15	78050698	70959
chr15	78668151	78668642	NM_001114735	BCL2A1	chr15	78050698	617699
chr15	78688888	78689348	NM_001114735	BCL2A1	chr15	78050698	638420
chr15	79014013	79014422	NM_001114735	BCL2A1	chr15	78050698	963520
chr15	79118577	79119068	NM_001114735	BCL2A1	chr15	78050698	1068125
chr15	79164632	79165025	NM_001114735	BCL2A1	chr15	78050698	1114131
chr15	79171222	79172290	NM_001114735	BCL2A1	chr15	78050698	1121058
chr15	79178417	79178854	NM_001114735	BCL2A1	chr15	78050698	1127938
chr15	79373493	79373881	NM_001114735	BCL2A1	chr15	78050698	1322989
chr15	79375138	79375517	NM_001114735	BCL2A1	chr15	78050698	1324630
chr15	79376056	79376488	NM_001114735	BCL2A1	chr15	78050698	1325574
chr15	79417950	79418336	NM_001114735	BCL2A1	chr15	78050698	1367445
chr15	79565310	79565735	NM_001114735	BCL2A1	chr15	78050698	1514825
chr15	79610714	79611092	NM_001114735	BCL2A1	chr15	78050698	1560205
chr15	79981466	79981964	NM_001114735	BCL2A1	chr15	78050698	1931017
chr15	80026964	80027346	NM_001114735	BCL2A1	chr15	78050698	1976457
chr15	80127208	80127568	NM_001114735	BCL2A1	chr15	78050698	2076690
chr15	80144158	80144548	NM_001114735	BCL2A1	chr15	78050698	2093655
chr15	80173152	80173560	NM_001114735	BCL2A1	chr15	78050698	2122658
chr3	169025326	169025739	NM_001122752	SERPINI1	chr3	168936125	89408
chr3	169142056	169142445	NM_001122752	SERPINI1	chr3	168936125	206126
chr3	169225090	169225312	NM_001122752	SERPINI1	chr3	168936125	289076
chr3	169318393	169318785	NM_001122752	SERPINI1	chr3	168936125	382464
chr3	169658677	169659109	NM_001122752	SERPINI1	chr3	168936125	722768
chr3	169994908	169995297	NM_001122752	SERPINI1	chr3	168936125	1058978
chr16	57415964	57416362	NM_001126129	GINS3	chr16	56983798	432365
chr16	57640258	57640667	NM_001126129	GINS3	chr16	56983798	656665
chr16	57658664	57659074	NM_001126129	GINS3	chr16	56983798	675071
chr16	57732463	57732621	NM_001126129	GINS3	chr16	56983798	748744
chr16	57802215	57802876	NM_001126129	GINS3	chr16	56983798	818748
chr16	57977455	57977711	NM_001126129	GINS3	chr16	56983798	993785
chr16	57985541	57985893	NM_001126129	GINS3	chr16	56983798	1001919
chr16	58051110	58051624	NM_001126129	GINS3	chr16	56983798	1067569
chr16	58669294	58669773	NM_001126129	GINS3	chr16	56983798	1685736
chr16	58773663	58774026	NM_001126129	GINS3	chr16	56983798	1790047
chr22	25628302	25628702	NM_001127	AP1B1	chr22	28114572	2486070
chr22	25839173	25839570	NM_001127	AP1B1	chr22	28114572	2275200
chr22	25841893	25842257	NM_001127	AP1B1	chr22	28114572	2272497
chr22	25858423	25858814	NM_001127	AP1B1	chr22	28114572	2255953
chr22	25938426	25938845	NM_001127	AP1B1	chr22	28114572	2175936
chr22	25965068	25965488	NM_001127	AP1B1	chr22	28114572	2149294
chr22	25973516	25973926	NM_001127	AP1B1	chr22	28114572	2140851
chr22	26023695	26024081	NM_001127	AP1B1	chr22	28114572	2090684
chr22	26025059	26025459	NM_001127	AP1B1	chr22	28114572	2089313
chr22	26050137	26050522	NM_001127	AP1B1	chr22	28114572	2064242
chr22	26133924	26134416	NM_001127	AP1B1	chr22	28114572	1980402
chr22	26146654	26147037	NM_001127	AP1B1	chr22	28114572	1967726
chr22	26238172	26238935	NM_001127	AP1B1	chr22	28114572	1876018
chr22	26294247	26294404	NM_001127	AP1B1	chr22	28114572	1820246
chr22	26303092	26303644	NM_001127	AP1B1	chr22	28114572	1811204
chr22	26336867	26337076	NM_001127	AP1B1	chr22	28114572	1777600
chr22	26396393	26396737	NM_001127	AP1B1	chr22	28114572	1718007
chr22	26611815	26612286	NM_001127	AP1B1	chr22	28114572	1502521
chr22	26741053	26741435	NM_001127	AP1B1	chr22	28114572	1373328
chr22	26755144	26755542	NM_001127	AP1B1	chr22	28114572	1359229
chr22	27536717	27537068	NM_001127	AP1B1	chr22	28114572	577679
chr22	27592961	27593312	NM_001127	AP1B1	chr22	28114572	521435
chr22	28013024	28013131	NM_001127	AP1B1	chr22	28114572	101494
chr22	28147809	28148106	NM_001127	AP1B1	chr22	28114572	33386
chr22	28265131	28265550	NM_001127	AP1B1	chr22	28114572	150769
chr22	28279599	28279998	NM_001127	AP1B1	chr22	28114572	165227
chr22	28922314	28922766	NM_001127	AP1B1	chr22	28114572	807968
chr22	28949305	28949801	NM_001127	AP1B1	chr22	28114572	834981
chr7	41822203	41822605	NM_001129	AEBP1	chr7	44110484	2288080
chr7	41827791	41828020	NM_001129	AEBP1	chr7	44110484	2282578
chr7	41922721	41923098	NM_001129	AEBP1	chr7	44110484	2187574
chr7	41935845	41936254	NM_001129	AEBP1	chr7	44110484	2174434
chr7	41999740	42000114	NM_001129	AEBP1	chr7	44110484	2110557
chr7	42150300	42150770	NM_001129	AEBP1	chr7	44110484	1959949
chr7	42268134	42268507	NM_001129	AEBP1	chr7	44110484	1842163
chr7	42335845	42336215	NM_001129	AEBP1	chr7	44110484	1774454
chr7	42979055	42979550	NM_001129	AEBP1	chr7	44110484	1131181
chr7	43472030	43472164	NM_001129	AEBP1	chr7	44110484	638387
chr7	43645989	43646393	NM_001129	AEBP1	chr7	44110484	464293
chr7	43653915	43654321	NM_001129	AEBP1	chr7	44110484	456366
chr7	43655997	43656248	NM_001129	AEBP1	chr7	44110484	454361
chr7	43884974	43885385	NM_001129	AEBP1	chr7	44110484	225304
chr7	43962091	43962462	NM_001129	AEBP1	chr7	44110484	148207
chr7	43983629	43983885	NM_001129	AEBP1	chr7	44110484	126727
chr7	44264094	44264453	NM_001129	AEBP1	chr7	44110484	153790
chr7	44384854	44385232	NM_001129	AEBP1	chr7	44110484	274559
chr7	44404618	44405105	NM_001129	AEBP1	chr7	44110484	294378
chr7	44645321	44645687	NM_001129	AEBP1	chr7	44110484	535020
chr7	45001242	45001630	NM_001129	AEBP1	chr7	44110484	890952
chrY	2815512	2815900	NM_001143	AMELY	chrY	6802068	3986362
chrY	7472281	7472765	NM_001143	AMELY	chrY	6802068	670455
chrY	7568238	7568654	NM_001143	AMELY	chrY	6802068	766378
chrY	7656666	7657297	NM_001143	AMELY	chrY	6802068	854914
chr16	50160976	50161379	NM_001144	AMFR	chr16	55016945	4855767
chr16	50168020	50168421	NM_001144	AMFR	chr16	55016945	4848724
chr16	50169027	50169415	NM_001144	AMFR	chr16	55016945	4847724
chr16	51682246	51682711	NM_001144	AMFR	chr16	55016945	3334466
chr16	51688608	51688991	NM_001144	AMFR	chr16	55016945	3328145
chr16	51690271	51690800	NM_001144	AMFR	chr16	55016945	3326409
chr16	52095807	52096313	NM_001144	AMFR	chr16	55016945	2920885
chr16	52106699	52107121	NM_001144	AMFR	chr16	55016945	2910035
chr16	52110129	52110503	NM_001144	AMFR	chr16	55016945	2906629
chr16	52668910	52669298	NM_001144	AMFR	chr16	55016945	2347841
chr16	52746748	52747151	NM_001144	AMFR	chr16	55016945	2269995
chr16	52965242	52965720	NM_001144	AMFR	chr16	55016945	2051464
chr16	53047774	53048236	NM_001144	AMFR	chr16	55016945	1968940
chr16	53066568	53066794	NM_001144	AMFR	chr16	55016945	1950264
chr16	53095816	53096261	NM_001144	AMFR	chr16	55016945	1920906
chr16	53919930	53920572	NM_001144	AMFR	chr16	55016945	1096694
chr16	53922202	53922686	NM_001144	AMFR	chr16	55016945	1094501
chr16	54091417	54091644	NM_001144	AMFR	chr16	55016945	925414
chr16	54422125	54422347	NM_001144	AMFR	chr16	55016945	594709
chr16	54427101	54427405	NM_001144	AMFR	chr16	55016945	589692
chr16	55198439	55199074	NM_001144	AMFR	chr16	55016945	181812
chr9	66198239	66198379	NM_001206	KLF9	chr9	72219393	6021084
chr9	66987165	66987547	NM_001206	KLF9	chr9	72219393	5232037
chr9	67908153	67909038	NM_001206	KLF9	chr9	72219393	4310797
chr9	70388377	70388733	NM_001206	KLF9	chr9	72219393	1830838
chr9	70474010	70474518	NM_001206	KLF9	chr9	72219393	1745129
chr9	70586717	70587098	NM_001206	KLF9	chr9	72219393	1632485
chr9	70985473	70985848	NM_001206	KLF9	chr9	72219393	1233732
chr9	71258520	71258895	NM_001206	KLF9	chr9	72219393	960685
chr9	71621884	71622340	NM_001206	KLF9	chr9	72219393	597281
chr9	71753383	71754249	NM_001206	KLF9	chr9	72219393	465577
chr9	72243345	72243735	NM_001206	KLF9	chr9	72219393	24147
chr9	72298966	72299347	NM_001206	KLF9	chr9	72219393	79764
chr9	72491283	72491629	NM_001206	KLF9	chr9	72219393	272063
chr9	72949831	72950223	NM_001206	KLF9	chr9	72219393	730634
chr9	73443353	73443789	NM_001206	KLF9	chr9	72219393	1224178
chr9	73451910	73452182	NM_001206	KLF9	chr9	72219393	1232653
chr9	73557042	73557425	NM_001206	KLF9	chr9	72219393	1337841
chr9	73859869	73860470	NM_001206	KLF9	chr9	72219393	1640777
chr9	74110041	74110416	NM_001206	KLF9	chr9	72219393	1890836
chr9	74248087	74248468	NM_001206	KLF9	chr9	72219393	2028885
chr9	74391480	74391769	NM_001206	KLF9	chr9	72219393	2172232
chr9	74413680	74414267	NM_001206	KLF9	chr9	72219393	2194581
chr9	74669662	74670092	NM_001206	KLF9	chr9	72219393	2450484
chr9	74802100	74802702	NM_001206	KLF9	chr9	72219393	2583008
chr9	74812842	74813336	NM_001206	KLF9	chr9	72219393	2593696
chr9	75122776	75123159	NM_001206	KLF9	chr9	72219393	2903575
chr21	34607326	34607698	NM_001236	CBR3	chr21	36429132	1821620
chr21	34806347	34806715	NM_001236	CBR3	chr21	36429132	1622601
chr21	34992218	34992806	NM_001236	CBR3	chr21	36429132	1436620
chr21	35011133	35011537	NM_001236	CBR3	chr21	36429132	1417797
chr21	35101694	35102069	NM_001236	CBR3	chr21	36429132	1327250
chr21	35340965	35341570	NM_001236	CBR3	chr21	36429132	1087864
chr21	35499405	35499805	NM_001236	CBR3	chr21	36429132	929527
chr21	35500699	35501134	NM_001236	CBR3	chr21	36429132	928215
chr21	35516671	35517211	NM_001236	CBR3	chr21	36429132	912191
chr21	35526698	35527113	NM_001236	CBR3	chr21	36429132	902226
chr21	35671714	35672073	NM_001236	CBR3	chr21	36429132	757238
[truncated: 11,879 more rows]

## Sheet: HUVEC_FLI1
Peak_chr	Peak_start	Peak_stop	Nearest_DifferentiallyExpressed_RefSeqID	Nearest_DifferentiallyExpressed_GeneSymbol	Nearest_DifferentiallyExpressed_RefSeq_chr	Nearest_DifferentiallyExpressed_RefSeq_TSS	Distance_PeakMidpoint_TSS_bp
chr8	18098621	18099031	NM_000015	NAT2	chr8	18293034	194208
chr8	18219230	18219568	NM_000015	NAT2	chr8	18293034	73635
chr8	18288990	18289436	NM_000015	NAT2	chr8	18293034	3821
chr8	18325900	18326914	NM_000015	NAT2	chr8	18293034	33373
chr8	18343277	18343647	NM_000015	NAT2	chr8	18293034	50428
chr8	18353413	18353749	NM_000015	NAT2	chr8	18293034	60547
chr8	18434655	18435034	NM_000015	NAT2	chr8	18293034	141811
chr8	18456656	18457070	NM_000015	NAT2	chr8	18293034	163829
chr8	18457428	18457849	NM_000015	NAT2	chr8	18293034	164605
chr8	18469610	18470059	NM_000015	NAT2	chr8	18293034	176801
chr8	18483710	18484238	NM_000015	NAT2	chr8	18293034	190940
chr8	18578007	18578929	NM_000015	NAT2	chr8	18293034	285434
chr8	18642543	18642882	NM_000015	NAT2	chr8	18293034	349679
chr8	18649618	18650056	NM_000015	NAT2	chr8	18293034	356803
chr8	18813031	18813452	NM_000015	NAT2	chr8	18293034	520208
chr8	18859301	18859799	NM_000015	NAT2	chr8	18293034	566516
chr8	18880271	18881191	NM_000015	NAT2	chr8	18293034	587697
chr8	18914237	18914837	NM_000015	NAT2	chr8	18293034	621503
chr8	18936042	18936933	NM_000015	NAT2	chr8	18293034	643454
chr8	18969425	18969775	NM_000015	NAT2	chr8	18293034	676566
chr8	18986636	18986948	NM_000015	NAT2	chr8	18293034	693758
chr8	19030062	19030317	NM_000015	NAT2	chr8	18293034	737156
chr8	19037467	19037854	NM_000015	NAT2	chr8	18293034	744627
chr8	19042466	19042843	NM_000015	NAT2	chr8	18293034	749621
chr8	19044002	19044654	NM_000015	NAT2	chr8	18293034	751294
chr8	19102614	19102736	NM_000015	NAT2	chr8	18293034	809641
chr8	19126958	19127900	NM_000015	NAT2	chr8	18293034	834395
chr8	19146730	19147532	NM_000015	NAT2	chr8	18293034	854097
chr8	19214654	19215054	NM_000015	NAT2	chr8	18293034	921820
chr8	19218095	19218538	NM_000015	NAT2	chr8	18293034	925283
chr8	19248369	19248778	NM_000015	NAT2	chr8	18293034	955540
chr8	19310783	19311102	NM_000015	NAT2	chr8	18293034	1017909
chr8	19360114	19360402	NM_000015	NAT2	chr8	18293034	1067224
chr8	19361558	19362015	NM_000015	NAT2	chr8	18293034	1068753
chr8	19373841	19374310	NM_000015	NAT2	chr8	18293034	1081042
chr8	19383747	19384119	NM_000015	NAT2	chr8	18293034	1090899
chr8	19385647	19386039	NM_000015	NAT2	chr8	18293034	1092809
chr8	19479954	19480236	NM_000015	NAT2	chr8	18293034	1187061
chr8	19480403	19480885	NM_000015	NAT2	chr8	18293034	1187610
chr8	19607989	19608363	NM_000015	NAT2	chr8	18293034	1315142
chr8	19614782	19615176	NM_000015	NAT2	chr8	18293034	1321945
chr8	19615369	19616123	NM_000015	NAT2	chr8	18293034	1322712
chr8	19617521	19617913	NM_000015	NAT2	chr8	18293034	1324683
chr8	19628379	19629048	NM_000015	NAT2	chr8	18293034	1335680
chr8	19642407	19642754	NM_000015	NAT2	chr8	18293034	1349547
chr8	19658237	19658504	NM_000015	NAT2	chr8	18293034	1365337
chr8	19773842	19774067	NM_000015	NAT2	chr8	18293034	1480921
chr8	19792336	19793147	NM_000015	NAT2	chr8	18293034	1499708
chr8	19800181	19800590	NM_000015	NAT2	chr8	18293034	1507352
chr8	19979741	19980245	NM_000015	NAT2	chr8	18293034	1686959
chr8	19988512	19988964	NM_000015	NAT2	chr8	18293034	1695704
chr8	20007488	20007861	NM_000015	NAT2	chr8	18293034	1714641
chr8	20016806	20017446	NM_000015	NAT2	chr8	18293034	1724092
chr8	20021386	20021781	NM_000015	NAT2	chr8	18293034	1728550
chr8	20088807	20089207	NM_000015	NAT2	chr8	18293034	1795973
chr8	20170500	20170881	NM_000015	NAT2	chr8	18293034	1877657
chr8	20231177	20231441	NM_000015	NAT2	chr8	18293034	1938275
chr8	20282548	20282985	NM_000015	NAT2	chr8	18293034	1989733
chr8	20336725	20337039	NM_000015	NAT2	chr8	18293034	2043848
chr10	86272858	86273229	NM_000043	FAS	chr10	90740267	4467223
chr10	86274681	86275082	NM_000043	FAS	chr10	90740267	4465385
chr10	86925406	86925799	NM_000043	FAS	chr10	90740267	3814664
chr10	87277693	87278061	NM_000043	FAS	chr10	90740267	3462390
chr10	87294599	87295034	NM_000043	FAS	chr10	90740267	3445450
chr10	87295672	87296054	NM_000043	FAS	chr10	90740267	3444404
chr10	87343977	87344343	NM_000043	FAS	chr10	90740267	3396107
chr10	87373237	87373481	NM_000043	FAS	chr10	90740267	3366908
chr10	87391929	87392398	NM_000043	FAS	chr10	90740267	3348103
chr10	87398106	87398461	NM_000043	FAS	chr10	90740267	3341983
chr10	88161227	88161677	NM_000043	FAS	chr10	90740267	2578815
chr10	88270426	88271033	NM_000043	FAS	chr10	90740267	2469537
chr10	88407155	88407681	NM_000043	FAS	chr10	90740267	2332849
chr10	88497494	88497906	NM_000043	FAS	chr10	90740267	2242567
chr10	88618043	88618613	NM_000043	FAS	chr10	90740267	2121939
chr10	88622553	88622975	NM_000043	FAS	chr10	90740267	2117503
chr10	88689186	88689632	NM_000043	FAS	chr10	90740267	2050858
chr10	88704121	88704507	NM_000043	FAS	chr10	90740267	2035953
chr10	88705267	88705642	NM_000043	FAS	chr10	90740267	2034812
chr10	88707245	88708040	NM_000043	FAS	chr10	90740267	2032624
chr10	88708829	88709120	NM_000043	FAS	chr10	90740267	2031292
chr10	88717167	88717591	NM_000043	FAS	chr10	90740267	2022888
chr10	88719021	88719397	NM_000043	FAS	chr10	90740267	2021058
chr10	88720997	88721462	NM_000043	FAS	chr10	90740267	2019037
chr10	88953549	88953911	NM_000043	FAS	chr10	90740267	1786537
chr10	89254284	89254812	NM_000043	FAS	chr10	90740267	1485719
chr10	89385469	89385854	NM_000043	FAS	chr10	90740267	1354605
chr10	89407110	89407550	NM_000043	FAS	chr10	90740267	1332937
chr10	89412183	89412422	NM_000043	FAS	chr10	90740267	1327964
chr10	89463037	89463465	NM_000043	FAS	chr10	90740267	1277016
chr10	89466064	89466435	NM_000043	FAS	chr10	90740267	1274017
chr10	89509916	89510383	NM_000043	FAS	chr10	90740267	1230117
chr10	89567815	89568130	NM_000043	FAS	chr10	90740267	1172294
chr10	89600482	89600914	NM_000043	FAS	chr10	90740267	1139569
chr10	89604503	89605032	NM_000043	FAS	chr10	90740267	1135499
chr10	89611808	89612334	NM_000043	FAS	chr10	90740267	1128196
chr10	89612646	89613179	NM_000043	FAS	chr10	90740267	1127354
chr10	89672819	89673267	NM_000043	FAS	chr10	90740267	1067224
chr10	89812507	89812982	NM_000043	FAS	chr10	90740267	927522
chr10	89817447	89817840	NM_000043	FAS	chr10	90740267	922623
chr10	89902539	89902914	NM_000043	FAS	chr10	90740267	837540
chr10	89912635	89913390	NM_000043	FAS	chr10	90740267	827254
chr10	89994060	89994398	NM_000043	FAS	chr10	90740267	746038
chr10	90029081	90029447	NM_000043	FAS	chr10	90740267	711003
chr10	90332565	90333141	NM_000043	FAS	chr10	90740267	407414
chr10	90396661	90397139	NM_000043	FAS	chr10	90740267	343367
chr10	90410830	90411208	NM_000043	FAS	chr10	90740267	329248
chr10	90453026	90453431	NM_000043	FAS	chr10	90740267	287038
chr10	90630217	90630653	NM_000043	FAS	chr10	90740267	109832
chr10	90736331	90736601	NM_000043	FAS	chr10	90740267	3801
chr10	90740799	90741187	NM_000043	FAS	chr10	90740267	726
chr10	90759610	90759999	NM_000043	FAS	chr10	90740267	19538
chr10	90781323	90782200	NM_000043	FAS	chr10	90740267	41495
chr10	90802023	90802365	NM_000043	FAS	chr10	90740267	61927
chr10	90812659	90813057	NM_000043	FAS	chr10	90740267	72591
chr10	90829784	90830166	NM_000043	FAS	chr10	90740267	89708
chr10	90829784	90830166	NM_000043	FAS	chr10	90740267	89708
chr10	90868060	90868594	NM_000043	FAS	chr10	90740267	128060
chr10	90872500	90872852	NM_000043	FAS	chr10	90740267	132409
chr10	90894467	90894958	NM_000043	FAS	chr10	90740267	154446
chrX	2709904	2710300	NM_000047	ARSE	chrX	2892494	182392
chrX	2745011	2745403	NM_000047	ARSE	chrX	2892494	147287
chrX	2825631	2826165	NM_000047	ARSE	chrX	2892494	66596
chrX	2856784	2857195	NM_000047	ARSE	chrX	2892494	35504
chrX	2895982	2896614	NM_000047	ARSE	chrX	2892494	3804
chrX	3070995	3071491	NM_000047	ARSE	chrX	2892494	178749
chrX	3199935	3200327	NM_000047	ARSE	chrX	2892494	307637
chrX	3567812	3568270	NM_000047	ARSE	chrX	2892494	675547
chrX	3582705	3583172	NM_000047	ARSE	chrX	2892494	690445
chr16	55398506	55398868	NM_000078	CETP	chr16	55553335	154648
chr16	55523977	55524814	NM_000078	CETP	chr16	55553335	28939
chr16	55551817	55552260	NM_000078	CETP	chr16	55553335	1296
chr16	55557258	55557665	NM_000078	CETP	chr16	55553335	4127
chr16	55577690	55578215	NM_000078	CETP	chr16	55553335	24618
chr16	55608769	55609141	NM_000078	CETP	chr16	55553335	55620
chr16	55630593	55630909	NM_000078	CETP	chr16	55553335	77416
chr16	55698073	55698688	NM_000078	CETP	chr16	55553335	145046
chr16	55731223	55731661	NM_000078	CETP	chr16	55553335	178107
chr16	55736577	55737002	NM_000078	CETP	chr16	55553335	183455
chr16	55738993	55739410	NM_000078	CETP	chr16	55553335	185867
chr16	55776310	55777689	NM_000078	CETP	chr16	55553335	223665
chr16	55778356	55778790	NM_000078	CETP	chr16	55553335	225238
chr16	55790181	55790537	NM_000078	CETP	chr16	55553335	237024
chrX	49506400	49506989	NM_000084	CLCN5	chrX	49718954	212259
chrX	49530358	49530882	NM_000084	CLCN5	chrX	49718954	188334
chrX	49768858	49769250	NM_000084	CLCN5	chrX	49718954	50100
chrX	49786014	49786417	NM_000084	CLCN5	chrX	49718954	67262
chrX	49788147	49788536	NM_000084	CLCN5	chrX	49718954	69388
chrX	49816989	49817558	NM_000084	CLCN5	chrX	49718954	98320
chrX	49853431	49853814	NM_000084	CLCN5	chrX	49718954	134669
chrX	50354249	50355195	NM_000084	CLCN5	chrX	49718954	635768
chrX	50377680	50378400	NM_000084	CLCN5	chrX	49718954	659086
chrX	50387187	50387569	NM_000084	CLCN5	chrX	49718954	668424
chrX	50388490	50388925	NM_000084	CLCN5	chrX	49718954	669754
chrX	50397891	50398280	NM_000084	CLCN5	chrX	49718954	679132
chrX	50399367	50399835	NM_000084	CLCN5	chrX	49718954	680647
chrX	50403349	50403560	NM_000084	CLCN5	chrX	49718954	684501
chrX	50405901	50406363	NM_000084	CLCN5	chrX	49718954	687178
chrX	50458399	50458800	NM_000084	CLCN5	chrX	49718954	739646
chrX	50528560	50528962	NM_000084	CLCN5	chrX	49718954	809807
chrX	50530398	50530898	NM_000084	CLCN5	chrX	49718954	811694
chrX	50539273	50539745	NM_000084	CLCN5	chrX	49718954	820555
chrX	50559369	50560027	NM_000084	CLCN5	chrX	49718954	840744
chrX	50573744	50574271	NM_000084	CLCN5	chrX	49718954	855054
chrX	50574882	50575292	NM_000084	CLCN5	chrX	49718954	856133
chrX	50673229	50673601	NM_000084	CLCN5	chrX	49718954	954461
chrX	51017117	51017481	NM_000084	CLCN5	chrX	49718954	1298345
chrX	51503003	51503388	NM_000084	CLCN5	chrX	49718954	1784242
chrX	51503861	51504221	NM_000084	CLCN5	chrX	49718954	1785087
chrX	51562597	51563071	NM_000084	CLCN5	chrX	49718954	1843880
chrX	51652554	51652924	NM_000084	CLCN5	chrX	49718954	1933785
chrX	52021335	52022006	NM_000084	CLCN5	chrX	49718954	2302717
chrX	52693804	52694321	NM_000084	CLCN5	chrX	49718954	2975109
chrX	52966573	52966859	NM_000084	CLCN5	chrX	49718954	3247762
chrX	52980545	52980820	NM_000084	CLCN5	chrX	49718954	3261729
chrX	53040802	53041989	NM_000084	CLCN5	chrX	49718954	3322442
chrX	53127538	53127989	NM_000084	CLCN5	chrX	49718954	3408810
chrX	53271001	53271380	NM_000084	CLCN5	chrX	49718954	3552237
chrX	53308961	53309399	NM_000084	CLCN5	chrX	49718954	3590226
chrX	53312901	53313104	NM_000084	CLCN5	chrX	49718954	3594049
chrX	53314945	53315372	NM_000084	CLCN5	chrX	49718954	3596205
chrX	53325678	53326123	NM_000084	CLCN5	chrX	49718954	3606947
chrX	53359414	53359568	NM_000084	CLCN5	chrX	49718954	3640537
chrX	53385681	53386042	NM_000084	CLCN5	chrX	49718954	3666908
chrX	53465784	53466516	NM_000084	CLCN5	chrX	49718954	3747196
chrX	53484361	53484856	NM_000084	CLCN5	chrX	49718954	3765655
chrX	53633263	53633710	NM_000084	CLCN5	chrX	49718954	3914533
chrX	53643411	53643770	NM_000084	CLCN5	chrX	49718954	3924637
chrX	53665013	53665379	NM_000084	CLCN5	chrX	49718954	3946242
chrX	53760151	53760590	NM_000084	CLCN5	chrX	49718954	4041417
chrX	53800163	53800741	NM_000084	CLCN5	chrX	49718954	4081498
chrX	54331402	54332029	NM_000084	CLCN5	chrX	49718954	4612762
chrX	54402191	54402756	NM_000084	CLCN5	chrX	49718954	4683520
chrX	54552428	54553207	NM_000084	CLCN5	chrX	49718954	4833864
chrX	54573308	54573702	NM_000084	CLCN5	chrX	49718954	4854551
chrX	54682502	54682954	NM_000084	CLCN5	chrX	49718954	4963774
chrX	54843640	54844078	NM_000084	CLCN5	chrX	49718954	5124905
chrX	54851372	54851497	NM_000084	CLCN5	chrX	49718954	5132481
chrX	54851363	54851845	NM_000084	CLCN5	chrX	49718954	5132650
chrX	55043135	55043376	NM_000084	CLCN5	chrX	49718954	5324302
chrX	55051725	55052148	NM_000084	CLCN5	chrX	49718954	5332983
chrX	55162471	55162856	NM_000084	CLCN5	chrX	49718954	5443710
chrX	55203932	55204336	NM_000084	CLCN5	chrX	49718954	5485180
chrX	55370113	55370524	NM_000084	CLCN5	chrX	49718954	5651365
chrX	55494730	55495466	NM_000084	CLCN5	chrX	49718954	5776144
chrX	55565749	55566138	NM_000084	CLCN5	chrX	49718954	5846990
chrX	55591214	55591648	NM_000084	CLCN5	chrX	49718954	5872477
chrX	55754012	55754316	NM_000084	CLCN5	chrX	49718954	6035210
chrX	55760191	55760528	NM_000084	CLCN5	chrX	49718954	6041406
chrX	55761282	55761763	NM_000084	CLCN5	chrX	49718954	6042569
chrX	55801237	55801618	NM_000084	CLCN5	chrX	49718954	6082474
chrX	55951125	55951718	NM_000084	CLCN5	chrX	49718954	6232468
chrX	56024755	56025206	NM_000084	CLCN5	chrX	49718954	6306027
chrX	56606240	56607083	NM_000084	CLCN5	chrX	49718954	6887708
chrX	56772219	56772891	NM_000084	CLCN5	chrX	49718954	7053601
chrX	56807474	56807824	NM_000084	CLCN5	chrX	49718954	7088695
chrX	56808484	56808928	NM_000084	CLCN5	chrX	49718954	7089752
chrX	56836839	56837280	NM_000084	CLCN5	chrX	49718954	7118106
chrX	56839690	56840315	NM_000084	CLCN5	chrX	49718954	7121049
chrX	57164347	57164981	NM_000084	CLCN5	chrX	49718954	7445710
chrX	57492612	57492948	NM_000084	CLCN5	chrX	49718954	7773826
chrX	62032961	62033446	NM_000084	CLCN5	chrX	49718954	12314250
chrX	62418680	62419133	NM_000084	CLCN5	chrX	49718954	12699953
chrX	62487954	62488332	NM_000084	CLCN5	chrX	49718954	12769189
[truncated: 39,216 more rows]
