# Supplementary material for: Tumor-specific retargeting of an oncogenic transcription factor chimera results in dysregulation of chromatin and transcription
Source: HighWire-hosted journal article supplement (doi:10.1101/gr.125666.111), 2011-11-15
Supplement: PatelSimon_TableS5.xlsx [file PatelSimon_TableS5.xlsx]

## Sheet: Cluster1_GREAT_wgBkg.txt
Ewings ChIP Cluster 1
# GREAT version 1.7.0	Species assembly: hg18
# Ontology	Term Name	Hyper FDR Q-Val	-log10(q)
MSigDB Perturbation	Genes up-regulated in mesenchymal stem cells (MSC) engineered to express EWS-FLI1 [Gene ID=2130, 2321] fusion protein.	4.71559e-35	34.3265
MSigDB Perturbation	Genes up-regulated in RD-EF cells (rhabdomyosarcoma) engineered to express EWSR1-FLI1 fusion [Gene ID=2130, 2313] and which are also highly expressed in Ewing's famliy tumors.	8.21716e-11	10.0853
MSigDB Perturbation	Genes within amplicon 8q12-q22 identified in a copy number alterations study of 191 breast tumor samples.	1.12205e-10	9.94999
MSigDB Perturbation	Genes down-regulated in at least one of three multiple myeloma (MM) cell lines by TSA [PubChem=5562].	6.1228e-06	5.21305
MGI Expression: Detected	TS17_limb;mesenchyme#	0.000801333	3.09619
MSigDB Perturbation	Genes up-regulated in transformed NIH3T3 cells (fibroblasts transformed by activated KRAS [Gene ID=3845]) vs normal cells.	0.000987673	3.00539
MSigDB Predicted Promoter Motifs	Motif GGTACAANNTGTYCTK matches NR3C1: nuclear receptor subfamily 3, group C, member 1 (glucocorticoid receptor)	0.00155365	2.80865
MSigDB Predicted Promoter Motifs	Motif NNNNTTCACGCWTGANTKNNN matches PAX6: paired box gene 6 (aniridia, keratitis)	0.00159639	2.79686
MGI Expression: Detected	TS15_limb;mesenchyme#	0.0020187	2.69493
MGI Expression: Detected	TS21_handplate	0.00243043	2.61432
MGI Expression: Detected	TS22_knee joint primordium	0.00303727	2.51752
MGI Expression: Detected	TS15_tail;mesenchyme	0.00310218	2.50833
MGI Expression: Detected	TS15_tail;mesenchyme;paraxial mesenchyme	0.00495064	2.30534
MSigDB Perturbation	Genes up-regulated in KCL22 cells (chronic myelogenous leukemia, CML, with BCR-ABL1 [GeneID=613, 25] fusion) by expression of CEBPA [GeneID=1050].	0.00737827	2.13205
MGI Expression: Detected	TS22_knee;mesenchyme	0.0131932	1.87965
MGI Expression: Detected	TS20_peripheral nervous system;autonomic	0.0162901	1.78808
MGI Expression: Detected	TS21_tail	0.0274875	1.56086
MGI Expression: Detected	TS17_somite#	0.0404976	1.39257
MSigDB Perturbation	Genes down-regulated in multiple myeloma (MM) cell lines treated with both decitabine [PubChem=451668] TSA [PubChem=5562].	0.0449313	1.34745

## Sheet: Cluster2_GREAT_wgBkg.txt
Ewings ChIP Cluster 2
# GREAT version 1.7.0	Species assembly: hg18
# Ontology	Term Name	Hyper FDR Q-Val	-log10(q)
MSigDB Perturbation	Genes up-regulated in mesenchymal stem cells (MSC) engineered to express EWS-FLI1 [Gene ID=2130, 2321] fusion protein.	3.81121e-33	32.4189
MSigDB Perturbation	Genes up-regulated in RD-EF cells (rhabdomyosarcoma) engineered to express EWSR1-FLI1 fusion [Gene ID=2130, 2313] and which are also highly expressed in Ewing's famliy tumors.	9.83524e-14	13.0072
Mouse Phenotype	abnormal ear morphology	3.19547e-09	8.49547
Mouse Phenotype	abnormal neurocranium morphology	1.92325e-07	6.71596
MGI Expression: Detected	TS11_embryo;mesoderm	1.97753e-06	5.70388
MSigDB Perturbation	Genes down-regulated in PC-3 cells (prostate cancer) stably expressing ST7 [Gene ID=7982] off a plasmid vector.	2.65961e-06	5.57518
MGI Expression: Detected	TS17_1st arch	5.8557e-06	5.23242
MGI Expression: Detected	TS19_head mesenchyme	7.05548e-06	5.15147
MGI Expression: Detected	TS12_embryo;mesenchyme	8.36272e-06	5.07765
Mouse Phenotype	abnormal snout morphology	1.34797e-05	4.87032
MGI Expression: Detected	TS21_lower jaw	4.50746e-05	4.34607
MGI Expression: Detected	TS16_embryo;mesenchyme	7.24346e-05	4.14005
MGI Expression: Detected	TS14_trunk mesenchyme	9.88469e-05	4.00504
Mouse Phenotype	abnormal spine curvature	0.000127867	3.89324
MSigDB Predicted Promoter Motifs	Motif SYATTGTG (no known TF)	0.000224231	3.6493
MGI Expression: Detected	TS14_embryo;mesenchyme	0.000244707	3.61135
MGI Expression: Detected	TS14_trunk mesenchyme;paraxial mesenchyme	0.000272979	3.56387
MGI Expression: Detected	TS11_allantois	0.000288501	3.53985
Mouse Phenotype	abnormal cranial suture morphology	0.000326236	3.48647
Mouse Phenotype	abnormal hearing electrophysiology	0.000421335	3.37537
Mouse Phenotype	abnormal tail morphology	0.000555277	3.25549
Mouse Phenotype	abnormal coat/hair pigmentation	0.000612673	3.21277
Mouse Phenotype	altered response of heart to induced stress	0.000752426	3.12354
Mouse Phenotype	short snout	0.000770506	3.11322
Mouse Phenotype	abnormal brainstem auditory evoked potential	0.000824115	3.08401
GO Biological Process	regulation of cell migration	0.000887979	3.0516
Mouse Phenotype	abnormal Schwann cell morphology	0.000935847	3.0288
Mouse Phenotype	white spotting	0.00108287	2.96543
MGI Expression: Detected	TS10_extraembryonic component	0.00172344	2.7636
Mouse Phenotype	variable body spotting	0.00174305	2.75869
Mouse Phenotype	belly spot	0.00175179	2.75652
MGI Expression: Detected	TS11_extraembryonic component	0.00181823	2.74035
MSigDB Predicted Promoter Motifs	Motif KRCAGGAARTRNKT matches ETS2: v-ets erythroblastosis virus E26 oncogene homolog 2 (avian)	0.00188808	2.72398
GO Biological Process	negative regulation of signaling pathway	0.00203484	2.69147
MGI Expression: Detected	TS11_yolk sac;mesoderm	0.00254725	2.59393
MSigDB Predicted Promoter Motifs	Motif NNYTTCCY matches STAT6: signal transducer and activator of transcription 6, interleukin-4 induced	0.00273725	2.56269
MSigDB Perturbation	Genes up-regulated in UB27 cells (osteosarcoma) at any time point after inducing the expression of a mutant form of WT1 [Gene ID=7490].	0.0027777	2.55631
MGI Expression: Detected	TS26_middle ear	0.00324685	2.48854
GO Biological Process	regulation of endothelial cell migration	0.00337322	2.47195
GO Biological Process	regulation of Wnt receptor signaling pathway	0.00339328	2.46938
GO Biological Process	epithelial cell proliferation	0.00369569	2.4323
MSigDB Predicted Promoter Motifs	Motif AAACWAM matches SRY: sex determining region Y	0.00415527	2.3814
GO Biological Process	hemopoiesis	0.00418228	2.37859
MGI Expression: Detected	TS11_yolk sac	0.00428623	2.36792
MGI Expression: Detected	TS11_blood island	0.00447535	2.34917
MSigDB Perturbation	Genes down-regulated in chronic lymphocytic leukemia (CLL) samples bearing deletions in the 13q14 region.	0.00481576	2.31734
Human Phenotype	Abnormality of the teeth	0.00498768	2.3021
MGI Expression: Detected	TS21_tail;mesenchyme;paraxial mesenchyme;somite	0.00599727	2.22205
Mouse Phenotype	decreased primordial germ cell number	0.00648791	2.18789
MGI Expression: Detected	TS13_2nd arch;mesenchyme	0.00751153	2.12427
Mouse Phenotype	abnormal primordial germ cell morphology	0.00817307	2.08761
GO Biological Process	hemopoietic or lymphoid organ development	0.00842133	2.07462
MSigDB Perturbation	Set 'NOS targets': genes upregulated and identified by ChIP on chip as targets of the transcription factors NANOG [Gene ID=79923], OCT4[Gene ID=5460], and Sox2 [Gene ID=6657] (NOS) in human embryonic stem cells.	0.0106187	1.97393
GO Biological Process	ribonucleotide metabolic process	0.0111035	1.95454
GO Biological Process	ribonucleotide biosynthetic process	0.011285	1.9475
MSigDB Perturbation	Genes down-regulated in UB27 cells (osteosarcoma) at 12 hr after inducing the expression of a mutated form of WT1 [Gene ID=7490].	0.0113597	1.94463
MSigDB Predicted Promoter Motifs	Motif GNCCAWATAWGGMN matches SRF: serum response factor (c-fos serum response element-binding transcription factor)	0.0117835	1.92872
MSigDB Predicted Promoter Motifs	Motif RGTGACTMANN matches JUN: jun oncogene	0.0119981	1.92089
MSigDB Predicted Promoter Motifs	Motif TGTGGT matches RUNX1: runt-related transcription factor 1 (acute myeloid leukemia 1; aml1 oncogene)	0.0123472	1.90843
MSigDB Predicted Promoter Motifs	Motif TGTGGT matches RUNX1: runt-related transcription factor 1 (acute myeloid leukemia 1; aml1 oncogene)	0.0123472	1.90843
Mouse Phenotype	exencephaly	0.0124409	1.90515
Mouse Phenotype	short outer hair cell stereocilia	0.0144001	1.84163
Human Phenotype	patches	0.0146141	1.83523
GO Biological Process	negative regulation of signal transduction	0.0147521	1.83115
MSigDB Predicted Promoter Motifs	Motif GAANYNYGACNY (no known TF)	0.0149238	1.82612
MSigDB Predicted Promoter Motifs	Motif CCAWATAWGGMNMNG matches SRF: serum response factor (c-fos serum response element-binding transcription factor)	0.0155745	1.80759
MSigDB Perturbation	Genes down-regulated in primary cultures of ovarian surface epithlium cells exposed to progesterone [PubChem=5994] for 5 days.	0.0155971	1.80696
GO Biological Process	positive regulation of heart contraction	0.0164986	1.78255
GO Biological Process	negative regulation of signaling process	0.0169218	1.77155
MSigDB Perturbation	Genes down-regulated in response to UVB radiation in HFK cells (keratinocytes) immortalized by overexpression of HPV E6 and E7 viral oncogenes.	0.0174536	1.75812
MSigDB Predicted Promoter Motifs	Motif CCAWWNAAGG matches SRF: serum response factor (c-fos serum response element-binding transcription factor)	0.0174975	1.75702
GO Biological Process	nucleoside triphosphate metabolic process	0.0178463	1.74845
GO Biological Process	regulation of heart rate	0.0182505	1.73872
GO Biological Process	purine nucleoside triphosphate metabolic process	0.022257	1.65253
MSigDB Predicted Promoter Motifs	Motif CASGYG (no known TF)	0.0239036	1.62154
MGI Expression: Detected	TS19_embryo;ectoderm	0.024157	1.61696
MSigDB Perturbation	Genes from the most frequent genomic gains and amplifications in a panel of patients with lymph node negative breast cancer (NNBC).	0.0254237	1.59476
GO Biological Process	regulation of smooth muscle cell migration	0.0258257	1.58795
GO Biological Process	purine ribonucleotide metabolic process	0.0265704	1.5756
Disease Ontology	fibroepithelial neoplasm	0.0273138	1.56362
Disease Ontology	fibrous tissue neoplasm	0.0278239	1.55558
MGI Expression: Detected	TS26_cochlear duct;epithelium	0.0281925	1.54987
MSigDB Predicted Promoter Motifs	Motif SCCAWATAWGGMNMNNNN matches SRF: serum response factor (c-fos serum response element-binding transcription factor)	0.028874	1.53949
Mouse Phenotype	abnormal double-positive T cell morphology	0.0308645	1.51054
MSigDB Perturbation	Genes positively correlated with recurrence free survival in patients with hepatitis B-related (HBV) hepatocellular carcinoma (HCC).	0.0310221	1.50833
MSigDB Perturbation	Genes down-regulated in quiescent (G0) CD34+ [Gene ID=8842] cells isolated from peripheral blood of CML (chronic myeloid leukemia) patients compared to the quiescent cells from normal donors.	0.0456369	1.34068
MSigDB Predicted Promoter Motifs	Motif DCCWTATATGGNCWN matches SRF: serum response factor (c-fos serum response element-binding transcription factor)	0.0491176	1.30876

## Sheet: Cluster3_GREAT_wgBkg.txt
Ewings ChIP Cluster 3
# GREAT version 1.7.0	Species assembly: hg18
# Ontology	Term Name	Hyper FDR Q-Val	-log10(q)
MSigDB Perturbation	Genes within amplicon 8q23-q24 identified in a copy number alterations study of 191 breast tumor samples.	7.88948e-16	15.103
Transcription Factor Targets	Targets of HSF1, identified by ChIP-chip in HeLa cells under heat shock	4.25051e-05	4.37156
MSigDB Perturbation	Genes within amplicon 17q21-q25 identified in a copy number alterations study of 191 breast tumor samples.	0.000142421	3.84643
MSigDB Predicted Promoter Motifs	Motif RCAGGAAGTGNNTNS matches ETS1: v-ets erythroblastosis virus E26 oncogene homolog 1 (avian)	0.000181513	3.74109
MSigDB Predicted Promoter Motifs	Motif YTACTTCCTG matches ETV7: ets variant gene 7 (TEL2 oncogene)	0.00113969	2.94321
MSigDB Predicted Promoter Motifs	Motif GGAANCGGAANY (no known TF)	0.00130757	2.88354
MSigDB Predicted Promoter Motifs	Motif SCGGAAGY matches ELK1: ELK1, member of ETS oncogene family	0.00135667	2.86753
MSigDB miRNA Motifs	Targets of MicroRNA CTCAGGG,MIR-125B,MIR-125A	0.00190694	2.71966
Pathway Commons	IGF1 pathway	0.00646897	2.18916
Pathway Commons	Arf1 pathway	0.00744466	2.12816
Pathway Commons	Plasma membrane estrogen receptor signaling	0.00881945	2.05456
MSigDB Perturbation	Genes within amplicon 1q21 identified in a copy number alterations study of 191 breast tumor samples.	0.0144918	1.83888
GO Cellular Component	focal adhesion	0.020635	1.6854
MSigDB Perturbation	Genes up-regulated in MCF7 cells (breast cancer) after stimulation with EGF [Gene ID=1950].	0.0214091	1.6694
GO Cellular Component	cell-substrate adherens junction	0.0230296	1.63771
GO Cellular Component	actin cytoskeleton	0.0236808	1.6256
MSigDB Perturbation	Cluster 6: late responding genes activated in ATM [Gene ID=472] deficient but not in the wild type tissues.	0.0487287	1.31222
MSigDB Perturbation	Housekeeping genes identified as expressed across 19 normal tissues.	0.0527736	1.27758

## Sheet: Cluster4_GREAT_wgBkg.txt
Ewings ChIP Cluster 4
# GREAT version 1.7.0	Species assembly: hg18
# Ontology	Term Name	Hyper FDR Q-Val	-log10(q)
Mouse Phenotype	decreased lymphocyte cell number	2.23142e-06	5.65142
MGI Expression: Detected	TS12_embryo;mesenchyme	4.72142e-06	5.32593
Mouse Phenotype	decreased T cell number	7.02589e-06	5.1533
MGI Expression: Detected	TS15_paraxial mesenchyme#	1.07926e-05	4.96688
MSigDB Pathway	Pathways in cancer	1.13656e-05	4.94441
MSigDB miRNA Motifs	Targets of MicroRNA GCACCTT,MIR-18A,MIR-18B	1.58756e-05	4.79927
MSigDB Perturbation	Genes up-regulated in UB27 cells (osteosarcoma) at any time point after inducing the expression of a mutant form of WT1 [Gene ID=7490].	1.82189e-05	4.73948
Mouse Phenotype	abnormal T cell number	4.37262e-05	4.35926
MSigDB Predicted Promoter Motifs	Motif RCAGGAAGTGNNTNS matches ETS1: v-ets erythroblastosis virus E26 oncogene homolog 1 (avian)	5.73859e-05	4.24119
MSigDB Perturbation	Genes up-regulated in RD-EF cells (rhabdomyosarcoma) engineered to express EWSR1-FLI1 fusion [Gene ID=2130, 2313] and which are also highly expressed in Ewing's famliy tumors.	5.77697e-05	4.2383
MSigDB Predicted Promoter Motifs	Motif RGAGGAARY matches SPI1: spleen focus forming virus (SFFV) proviral integration oncogene spi1	9.22345e-05	4.03511
MGI Expression: Detected	TS19_cardiovascular system	0.000118488	3.92632
Mouse Phenotype	abnormal B cell physiology	0.000142618	3.84583
MSigDB Perturbation	Genes up-regulated during pubertal mammary gland development between weeks 3 and 4.	0.000188953	3.72365
Mouse Phenotype	abnormal thymus physiology	0.000201037	3.69672
GO Biological Process	regulation of homeostatic process	0.000276048	3.55902
Mouse Phenotype	abnormal CD4-positive T cell morphology	0.000292069	3.53451
MSigDB Perturbation	Genes down-regulated in transformed NIH3T3 cells (fibroblasts transformed by activated KRAS [Gene ID=3845]) vs normal cells.	0.000295022	3.53015
MSigDB Perturbation	Genes co-regulated in uterus during a time course response to progesterone [PubChem=5994]: SOM cluster 1.	0.000343633	3.46391
Mouse Phenotype	abnormal B cell differentiation	0.000391045	3.40777
Mouse Phenotype	abnormal self tolerance	0.000428212	3.36834
GO Biological Process	ion homeostasis	0.000438981	3.35755
MSigDB Predicted Promoter Motifs	Motif ANNCACTTCCTG matches ETS1: v-ets erythroblastosis virus E26 oncogene homolog 1 (avian)	0.000446045	3.35062
MGI Expression: Detected	TS14_extraembryonic component	0.000465162	3.3324
Mouse Phenotype	abnormal effector T cell morphology	0.000487777	3.31178
Pathway Commons	Platelet activation triggers	0.00054472	3.26383
MGI Expression: Detected	TS22_dorsal mesogastrium;splenic primordium	0.000559526	3.25218
MSigDB Predicted Promoter Motifs	Motif RNWMBAGGAART matches ELF1: E74-like factor 1 (ets domain transcription factor)	0.000571783	3.24277
Mouse Phenotype	decreased single-positive T cell number	0.000594035	3.22619
MGI Expression: Detected	TS22_dorsal mesogastrium	0.000596972	3.22405
Mouse Phenotype	abnormal immune tolerance	0.0006095	3.21503
MGI Expression: Detected	TS20_embryo;head#	0.000635259	3.19705
MGI Expression: Detected	TS22_stomach;mesentery	0.000750437	3.12469
MGI Expression: Detected	TS11_yolk sac	0.000769152	3.11399
Mouse Phenotype	decreased CD4-positive T cell number	0.000779414	3.10823
Mouse Phenotype	autoimmune response	0.000799777	3.09703
MGI Expression: Detected	TS19_reproductive system	0.000812767	3.09003
Pathway Commons	Formation of Platelet plug	0.000890384	3.05042
MSigDB miRNA Motifs	Targets of MicroRNA ATCTTGC,MIR-31	0.000963247	3.01626
Pathway Commons	Platelet Activation	0.00107042	2.97045
Mouse Phenotype	abnormal lymph node morphology	0.00109116	2.96211
GO Biological Process	regulation of metal ion transport	0.00114474	2.94129
Disease Ontology	primary biliary cirrhosis	0.0011587	2.93603
GO Biological Process	cellular ion homeostasis	0.00118601	2.92591
MSigDB Perturbation	Genes up-regulated in UB27 cells (osteosarcoma) at 8 hr after inducing the expression of a mutant form of WT1 [Gene ID=7490].	0.00118693	2.92557
MSigDB Perturbation	Genes down-regulated in ZR-75-1 cells (breast cancer, amplified 8p11-12 region) upon knockdown of PPAPDC1B [Gene ID=84513] by RNAi.	0.00121409	2.91575
MSigDB Perturbation	Genes down-regulated in non-apoptotic tissues (fetal liver) after MDM4 [Gene ID=4194] knockout.	0.00154251	2.81177
MSigDB Perturbation	Genes up-regulated in circulating endothelial cells (CEC) from cancer patients compared to those from healthy donors.	0.00156186	2.80636
Mouse Phenotype	abnormal single-positive T cell number	0.00159775	2.79649
GO Biological Process	regulation of MAP kinase activity	0.00160209	2.79531
GO Biological Process	cellular chemical homeostasis	0.00160515	2.79448
GO Biological Process	positive regulation of gene-specific transcription from RNA polymerase II promoter	0.001612	2.79264
MSigDB Perturbation	Genes up-regulated in MCF7 cells (breast cancer) after stimulation with EGF [Gene ID=1950].	0.00163685	2.78599
MSigDB Perturbation	Genes whose expression peaked at 60 min after stimulation of MCF10A cells with serum.	0.00179789	2.74524
Mouse Phenotype	abnormal CD4-positive T cell number	0.00181178	2.74189
MGI Expression: Detected	TS12_somite#	0.00188568	2.72453
Pathway Commons	GPVI-mediated activation cascade	0.00225935	2.64602
MGI Expression: Detected	TS15_extraembryonic component	0.00228792	2.64056
MSigDB Perturbation	Genes up-regulated in MCF7 cells (breast cancer) after stimulation with NRG1 [Gene ID=3084].	0.00284175	2.54641
Mouse Phenotype	abnormal T cell apoptosis	0.00296502	2.52797
PANTHER Pathway	Integrin signalling pathway	0.00297237	2.5269
GO Biological Process	regulation of ion transport	0.00297265	2.52686
GO Biological Process	positive regulation of gene-specific transcription	0.0033895	2.46986
MSigDB Predicted Promoter Motifs	Motif RGCAGSTG matches MYOG: myogenin (myogenic factor 4)	0.00344883	2.46233
MSigDB Predicted Promoter Motifs	Motif SCCAWATAWGGMNMNNNN matches SRF: serum response factor (c-fos serum response element-binding transcription factor)	0.00373057	2.42823
Disease Ontology	astrocytoma	0.00377272	2.42335
Pathway Commons	Cell surface interactions at the vascular wall	0.00379037	2.42132
MSigDB Predicted Promoter Motifs	Motif KRCAGGAARTRNKT matches ETS2: v-ets erythroblastosis virus E26 oncogene homolog 2 (avian)	0.00380579	2.41956
MSigDB Predicted Promoter Motifs	Motif CTGYNNCTYTAA (no known TF)	0.00391349	2.40744
Pathway Commons	Hemostasis	0.00441851	2.35472
Disease Ontology	malignant primary brain tumor	0.00441888	2.35469
MGI Expression: Detected	TS19_mesonephros	0.00444777	2.35186
PANTHER Pathway	PDGF signaling pathway	0.00450924	2.3459
Disease Ontology	primary brain tumor	0.0047369	2.32451
MSigDB Perturbation	Genes whose expression peaked at 480 min after stimulation of HeLa cells with EGF [Gene ID=1950].	0.00510105	2.29234
MSigDB Pathway	Keratinocyte Differentiation	0.00612191	2.21311
MGI Expression: Detected	TS19_gonad primordium	0.00628104	2.20197
Mouse Phenotype	altered susceptibility to autoimmune disorder	0.00643996	2.19112
MGI Expression: Detected	TS14_common atrial chamber	0.0073344	2.13464
MGI Expression: Detected	TS19_arterial system	0.00743026	2.129
GO Biological Process	cellular metal ion homeostasis	0.00795914	2.09913
GO Biological Process	response to metal ion	0.00884839	2.05314
Mouse Phenotype	abnormal CD8-positive T cell number	0.00892032	2.04962
Pathway Commons	Collagen adhesion via GPVI	0.00893581	2.04887
PANTHER Pathway	Alzheimer disease-presenilin pathway	0.00961277	2.01715
Disease Ontology	rhinitis	0.010416	1.9823
MSigDB Predicted Promoter Motifs	Motif GGGSTCWR matches ITGAL: integrin, alpha L (antigen CD11A (p180), lymphocyte function-associated antigen 1; alpha polypeptide)	0.0108859	1.96313
Mouse Phenotype	decreased CD8-positive T cell number	0.0109144	1.962
GO Biological Process	regulation of erythrocyte differentiation	0.0117244	1.93091
GO Biological Process	negative regulation of cell projection organization	0.0122413	1.91217
MGI Expression: Detected	TS19_liver and biliary system	0.0133377	1.87492
Pathway Commons	Eicosanoid ligand-binding receptors	0.0134406	1.87158
Pathway Commons	Thromboxane signalling through TP receptor	0.0137048	1.86313
Pathway Commons	IL12-mediated signaling events	0.0138819	1.85755
GO Biological Process	cellular calcium ion homeostasis	0.014933	1.82585
GO Biological Process	metal ion homeostasis	0.0151719	1.81896
PANTHER Pathway	EGF receptor signaling pathway	0.0152163	1.81769
MSigDB Predicted Promoter Motifs	Motif DCCWTATATGGNCWN matches SRF: serum response factor (c-fos serum response element-binding transcription factor)	0.0157872	1.80169
MSigDB Pathway	NFkB activation by Nontypeable Hemophilus influenzae	0.0166272	1.77918
MSigDB Predicted Promoter Motifs	Motif CCANNAGRKGGC (no known TF)	0.0178046	1.74947
Pathway Commons	Prostanoid ligand receptors	0.0180121	1.74444
MSigDB Perturbation	Genes whose expression peaked at 40 min after stimulation of HeLa cells with EGF [Gene ID=1950].	0.018209	1.73971
MSigDB Predicted Promoter Motifs	Motif NNNNKGGRAANTCCCN (no known TF)	0.0183473	1.73643
MGI Expression: Detected	TS23_heart	0.0183973	1.73525
MSigDB Predicted Promoter Motifs	Motif WGAGGAAG matches SPI1: spleen focus forming virus (SFFV) proviral integration oncogene spi1	0.0194196	1.71176
MSigDB Perturbation	Genes down-regulated in HCT8/S11 cells (colon cancer) engineered to stably express NTN1 [Gene ID=1630] off a plasmid vector.	0.0202984	1.69254
PANTHER Pathway	B cell activation	0.0205534	1.68712
GO Biological Process	calcium ion homeostasis	0.021266	1.67231
MSigDB Predicted Promoter Motifs	Motif RRCCGTTA (no known TF)	0.0219921	1.65773
Disease Ontology	oligodendroglioma	0.0226128	1.64565
MSigDB Perturbation	The 'Bullinger validation signature' [PMID=15084693] used to validate prediction of prognostic outcome of acute myeloid leukemia (AML) patients with a normal karyotype.	0.0226981	1.64401
MSigDB Perturbation	Genes up-regulated in peripheral B lymphocytes after incubation with IL4 [Gene ID=3565] for 4 h.	0.0228088	1.6419
GO Biological Process	cellular di-, tri-valent inorganic cation homeostasis	0.024544	1.61005
Pathway Commons	Calcitonin-like ligand receptors	0.0273632	1.56283
Pathway Commons	Signaling by FGFR	0.0273979	1.56228
Pathway Commons	FGFR ligand binding and activation	0.0273979	1.56228
Pathway Commons	Platelet Adhesion to exposed collagen	0.0276801	1.55783
MSigDB Predicted Promoter Motifs	Motif CCTNTMAGA (no known TF)	0.0277807	1.55626
MSigDB Pathway	NF-kB Signaling Pathway	0.0278528	1.55513
Pathway Commons	Platelet Aggregation (Plug Formation)	0.0278624	1.55498
MSigDB Perturbation	Genes up-regulated in hepatic stellar cells after stimulation with bacterial lipopolysacharide (LPS).	0.0281558	1.55043
MSigDB Predicted Promoter Motifs	Motif CAGNYGKNAAA (no known TF)	0.0284253	1.5463
MSigDB Predicted Promoter Motifs	Motif GNCCAWATAWGGMN matches SRF: serum response factor (c-fos serum response element-binding transcription factor)	0.0291673	1.5351
Pathway Commons	Adenosine P1 receptors	0.0293547	1.53232
MSigDB Predicted Promoter Motifs	Motif GCCNNNRGS matches TFAP2A: transcription factor AP-2 alpha (activating enhancer binding protein 2 alpha)	0.0293927	1.53176
MSigDB Predicted Promoter Motifs	Motif ARGGGTTAA (no known TF)	0.0295504	1.52944
MGI Expression: Detected	TS23_liver	0.0299941	1.52296
GO Biological Process	cellular response to dexamethasone stimulus	0.030434	1.51664
Disease Ontology	peripheral nerve Sheath neoplasm	0.0311591	1.50641
Pathway Commons	Regulation of Insulin Secretion	0.0315107	1.50154
GO Cellular Component	cell-substrate adherens junction	0.0318362	1.49708
MGI Expression: Detected	TS23_liver and biliary system	0.0318901	1.49634
MSigDB Pathway	Genes related to Wnt-mediated signal transduction	0.0321948	1.49221
MSigDB Perturbation	Genes down-regulated in MEF cells (embryonic fibroblasts) isolated from RB1 [Gene ID=5925] knockout mice: chronic loss of function (LOF) of RB1.	0.0322075	1.49204
Disease Ontology	HIV-associated lipodystrophy syndrome	0.0341641	1.46643
Disease Ontology	Kallmann syndrome	0.0341641	1.46643
MSigDB Predicted Promoter Motifs	Motif GCCYNNGGS matches TFAP2C: transcription factor AP-2 gamma (activating enhancer binding protein 2 gamma)	0.0354371	1.45054
GO Biological Process	response to estrogen stimulus	0.0356736	1.44765
MSigDB Pathway	METS affect on Macrophage Differentiation	0.0364546	1.43825
MSigDB Perturbation	Genes down-regulated in primary fibroblast cell culture point after infection with HCMV (AD169 strain) at 4 h time point that were not down-regulated at the previous time point, 2 h.	0.0365423	1.4372
Pathway Commons	FGFR1 ligand binding and activation	0.03666	1.43581
GO Cellular Component	focal adhesion	0.0370744	1.43093
GO Cellular Component	cell-substrate junction	0.0381041	1.41903
Disease Ontology	upper respiratory tract disease	0.0384035	1.41563
Disease Ontology	oligodendroglial neoplasm	0.0412882	1.38417
MSigDB Pathway	T cell receptor signaling pathway	0.0453277	1.34364
Pathway Commons	G-protein beta:gamma signalling	0.0469713	1.32817
GO Biological Process	T cell homeostasis	0.0473697	1.3245

## Sheet: Cluster5_GREAT_wgBkg.txt
Ewings ChIP Cluster 5
# GREAT version 1.7.0	Species assembly: hg18
# Ontology	Term Name	Hyper FDR Q-Val	-log10(q)
MSigDB Perturbation	Genes up-regulated in response to both hypoxia and overexpression of an active form of HIF1A [Gene ID=3091].	5.44991e-18	17.2636
GO Biological Process	vasculature development	1.89544e-17	16.7223
GO Biological Process	blood vessel development	8.17656e-17	16.0874
GO Biological Process	blood vessel morphogenesis	8.66134e-15	14.0624
Mouse Phenotype	abnormal artery morphology	7.44194e-13	12.1283
GO Biological Process	angiogenesis	2.12772e-12	11.6721
Mouse Phenotype	abnormal vascular development	4.92663e-11	10.3075
GO Biological Process	regulation of cellular component movement	1.6044e-10	9.79469
Mouse Phenotype	abnormal artery development	2.29787e-10	9.63867
GO Biological Process	regulation of cell migration	7.88882e-10	9.10299
Mouse Phenotype	abnormal blood vessel physiology	9.07465e-10	9.04217
MGI Expression: Detected	TS28_decidua	6.73535e-09	8.17164
MSigDB Perturbation	Genes selected in supervised analyses to discriminate cells expressing activated HRAS [Gene ID=3265] oncogene from control cells expressing GFP.	3.33321e-08	7.47714
MGI Expression: Detected	TS15_blood vessel#	5.62048e-08	7.25023
MGI Expression: Detected	TS15_arterial system	1.44936e-07	6.83882
Mouse Phenotype	abnormal aorta morphology	2.51945e-07	6.59869
Mouse Phenotype	abnormal dorsal aorta morphology	6.66279e-07	6.17634
MGI Expression: Detected	TS13_yolk sac	8.21091e-07	6.08561
Mouse Phenotype	anemia	1.02118e-06	5.9909
MSigDB Perturbation	Genes up-regulated in HMEC cells (primary mammary epithelium) upon expression of both of TP53 [Gene ID=7157] and the transcriptionally active isoform of TP63 [Gene ID=8626] off adenoviral vectors.	1.14495e-06	5.94121
Mouse Phenotype	abnormal red blood cell	1.30438e-06	5.8846
Mouse Phenotype	abnormal vitelline vasculature	1.59117e-06	5.79828
MSigDB Pathway	Focal adhesion	2.7221e-06	5.5651
MSigDB Perturbation	Genes whose expression peaked at 480 min after stimulation of HeLa cells with EGF [Gene ID=1950].	5.62572e-06	5.24982
Mouse Phenotype	abnormal embryonic hematopoiesis	6.7672e-06	5.16959
GO Biological Process	regulation of endothelial cell migration	9.84978e-06	5.00657
GO Biological Process	negative regulation of locomotion	1.62812e-05	4.78831
MGI Expression: Detected	TS21_lung;associated mesenchyme#	1.74115e-05	4.75916
MGI Expression: Detected	TS13_dorsal aorta	1.76824e-05	4.75246
MSigDB Perturbation	Genes up-regulated in MCF7 cells (breast cancer) after stimulation with NRG1 [Gene ID=3084].	1.88364e-05	4.725
GO Biological Process	regulation of endothelial cell proliferation	2.04508e-05	4.68929
MGI Expression: Detected	TS15_dorsal aorta	3.01949e-05	4.52007
MGI Expression: Detected	TS11_parietal endoderm	3.61834e-05	4.44149
MSigDB Perturbation	Genes up-regulated in UB27 cells (osteosarcoma) at 12 hr after inducing the expression of a mutated form of WT1 [Gene ID=7490].	3.67032e-05	4.4353
GO Biological Process	negative regulation of cell migration	3.81908e-05	4.41804
GO Biological Process	negative regulation of cellular component movement	4.14446e-05	4.38253
GO Biological Process	positive regulation of cellular component movement	6.73985e-05	4.17135
MGI Expression: Detected	TS15_extraembryonic component	9.6294e-05	4.0164
Mouse Phenotype	abnormal erythrocyte morphology	0.000108947	3.96278
Mouse Phenotype	abnormal basement membrane morphology	0.000112491	3.94888
MGI Expression: Detected	TS20_ventricle	0.000121037	3.91708
MGI Expression: Detected	TS15_yolk sac	0.000128032	3.89268
MSigDB Predicted Promoter Motifs	Motif GCCAYGYGSN matches MYC: v-myc myelocytomatosis viral oncogene homolog (avian)&lt;br&gt; MAX: MYC associated factor X	0.000134497	3.87129
MSigDB Perturbation	Transcripts depleted from pseudopodia of NIH/3T3 cells (fibroblast) in response to haptotactic migratory stimulus by fibronectin, FN1 [Gene ID=2335].	0.000139317	3.85599
MSigDB Perturbation	The 324 genes identified by two analytical methods as changed in the mammary tumors induced by transgenic expression of ERBB2 [Gene ID=2064].	0.000162875	3.78815
MSigDB Perturbation	Angiogenic markers up-regulated in lymph endothelial cells upon infection with KSHV (Kaposi's sarcoma herpes virus).	0.000163185	3.78732
GO Biological Process	positive regulation of cell migration	0.000213362	3.67088
MSigDB Perturbation	Genes regulated by hypoxia, based on literature searches.	0.000306519	3.51354
miRNA Targets	Genes that were down-regulated in HeLa cells that were transfected with miR-124	0.000309634	3.50915
GO Biological Process	cell-substrate adhesion	0.000316676	3.49939
MSigDB Perturbation	Genes up-regulated in serrated vs conventional colorectal carcinoma (CRC) samples.	0.000317596	3.49813
Disease Ontology	hemorrhagic disease	0.000444149	3.35247
Disease Ontology	bladder cancer	0.000457519	3.33959
MGI Expression: Detected	TS28_blood vessel	0.000459395	3.33781
GO Biological Process	cell-matrix adhesion	0.00050793	3.2942
GO Biological Process	positive regulation of endothelial cell proliferation	0.000558101	3.25329
Mouse Phenotype	abnormal hematopoietic system physiology	0.0006023	3.22019
Disease Ontology	blood coagulation disease	0.000629197	3.20121
Disease Ontology	liver neoplasm	0.00068925	3.16162
Disease Ontology	atherosclerosis	0.000724065	3.14022
Disease Ontology	arterial occlusive disease	0.000848288	3.07146
GO Biological Process	wound healing	0.000919274	3.03655
Disease Ontology	arteriosclerosis	0.000921697	3.03541
Mouse Phenotype	abnormal hematocrit	0.00108455	2.96475
MSigDB miRNA Motifs	Targets of MicroRNA CCACACA,MIR-147	0.0011574	2.93652
Disease Ontology	thyroid gland disease	0.00116366	2.93417
Disease Ontology	breast carcinoma	0.00118389	2.92669
GO Molecular Function	Rho guanyl-nucleotide exchange factor activity	0.0013414	2.87244
Pathway Commons	Neurophilin interactions with VEGF and VEGFR	0.00143875	2.84201
Mouse Phenotype	abnormal lymph node size	0.0021265	2.67233
Mouse Phenotype	abnormal hemoglobin content	0.00218577	2.6604
GO Cellular Component	focal adhesion	0.00221495	2.65464
Pathway Commons	Sphingosine 1-phosphate (S1P) pathway	0.0022773	2.64258
MSigDB Perturbation	'Early-TGFB1 signature': genes overexpressed in primary hepatocytes at an early phase of TGFB1 [Gene ID=7040] treatment; is associated with a less invasive phenotype.	0.00235992	2.6271
Disease Ontology	osteosarcoma of bone	0.00248148	2.60529
MSigDB Perturbation	Genes up-regulated by MYC [Gene ID=4609] and whose promoters are bound by MYC, according to MYC Target Gene Database.	0.0025254	2.59767
MSigDB Perturbation	Genes down-regulated in reverted NIH3T3 cells (fibroblasts transformed by activated KRAS [Gene ID=3845] which then reverted to normal cells upon stable over-expression of a dominant negative form of CDC25 [Gene ID=5923]) vs normal fibroblasts.	0.00254579	2.59418
GO Molecular Function	Ras guanyl-nucleotide exchange factor activity	0.00296213	2.5284
GO Cellular Component	cell-substrate adherens junction	0.00317156	2.49873
GO Cellular Component	cell-substrate junction	0.00318042	2.49752
MSigDB Perturbation	Genes down-regulated in HT29 cells (colon cancer) after knockdown of CD24 [Gene ID=100133941] by both RNAi and monoclonal antibodies.	0.00333982	2.47628
Disease Ontology	metastasis to lymph node	0.0033979	2.46879
MSigDB Perturbation	Genes up-regulated in corneal fibroblasts after treatment with IL1A [Gene ID=3552].	0.0037994	2.42029
Disease Ontology	lymph node disease	0.00399249	2.39876
Mouse Phenotype	decreased hematocrit	0.00422194	2.37449
MGI Expression: Detected	TS16_extraembryonic component	0.00442467	2.35412
Disease Ontology	stomach carcinoma	0.00497321	2.30336
MSigDB Perturbation	Genes from 'subtype S3' signature of hepatocellular carcinoma (HCC): hepatocyte differentiation.	0.00514691	2.28845
Pathway Commons	Integrins in angiogenesis	0.00540297	2.26737
Pathway Commons	VEGF ligand-receptor interactions	0.00542184	2.26585
Pathway Commons	Signaling by VEGF	0.00542184	2.26585
Pathway Commons	Nectin adhesion pathway	0.00578307	2.23784
Disease Ontology	peripheral vascular disease	0.00599693	2.22207
Mouse Phenotype	abnormal hemoglobin	0.00605584	2.21783
Pathway Commons	Direct p53 effectors	0.00699795	2.15503
MSigDB Perturbation	Genes whose expression peaked at 120 min after stimulation of HeLa cells with EGF [Gene ID=1950].	0.00705743	2.15135
MSigDB Perturbation	Transcripts depleted in pseudopodia of NIH/3T3 cells (fibroblast) in response to the chemotactic migration stimulus by lysophosphatidic acid (LPA) [PubChem=3988].	0.00716885	2.14455
PANTHER Pathway	Angiogenesis	0.00740862	2.13026
PANTHER Pathway	Integrin signalling pathway	0.00756705	2.12107
Pathway Commons	p53 pathway	0.0082284	2.08468
Pathway Commons	Signaling events mediated by VEGFR1 and VEGFR2	0.00906262	2.04275
PANTHER Pathway	Notch signaling pathway	0.00955289	2.01987
MGI Expression: Detected	TS11_allantois	0.00970648	2.01294
Pathway Commons	VEGFR1 specific signals	0.00994962	2.00219
Pathway Commons	Osteopontin-mediated events	0.00994962	2.00219
GO Biological Process	sterol metabolic process	0.0100355	1.99846
GO Biological Process	endothelial cell differentiation	0.0101487	1.99359
MGI Expression: Detected	TS12_arterial system	0.0112222	1.94992
MSigDB Predicted Promoter Motifs	Motif TGCNHNCWYCCYCATTAKTNNDCNMNHYCN matches HOXA5: homeobox A5	0.0127774	1.89356
Pathway Commons	HIF-1-alpha transcription factor network	0.0133657	1.87401
Disease Ontology	nephrosis	0.0144083	1.84139
MSigDB Perturbation	Genes whose expression profile is specific to Custer I of urothelial cell carcinoma (UCC) tumors.	0.014726	1.83192
Mouse Phenotype	abnormal lymphatic vessel morphology	0.0168001	1.77469
MGI Expression: Detected	TS23_blood vessel#	0.0170935	1.76717
InterPro	Dbl homology (DH) domain	0.018186	1.74026
Disease Ontology	mature B-cell lymphocytic neoplasm	0.0188391	1.72494
MSigDB Pathway	Neuropeptides VIP and PACAP inhibit the apoptosis of activated T cells	0.0200945	1.69692
Disease Ontology	retinal vascular occlusion	0.0201436	1.69586
MGI Expression: Detected	TS21_extraembryonic component;cardiovascular system;arterial system	0.0203148	1.69219
MGI Expression: Detected	TS20_blood vessel#	0.0247665	1.60614
MSigDB miRNA Motifs	Targets of MicroRNA CCAGGGG,MIR-331	0.0251174	1.60003
Disease Ontology	plasmacytoma	0.025614	1.59152
MSigDB Pathway	Agrin in Postsynaptic Differentiation	0.0261997	1.5817
Pathway Commons	NrCAM interactions	0.0268482	1.57108
GO Biological Process	cholesterol metabolic process	0.0272971	1.56388
Mouse Phenotype	decreased hemoglobin content	0.0277068	1.55741
MGI Expression: Detected	TS25_submandibular gland	0.0300926	1.52154
Pathway Commons	EGFR1	0.0315338	1.50122
MGI Expression: Detected	TS16_yolk sac	0.0350988	1.45471
MSigDB Pathway	ECM-receptor interaction	0.0369041	1.43292
MSigDB Predicted Promoter Motifs	Motif TTGCWCAAY matches CEBPB: CCAAT/enhancer binding protein (C/EBP), beta	0.0377071	1.42358
MSigDB Predicted Promoter Motifs	Motif GGGGCGGGGC matches SP1: Sp1 transcription factor	0.0379299	1.42102
MSigDB Pathway	Genes involved in Integrin cell surface interactions	0.0380866	1.41923
Pathway Commons	Regulation of Insulin-like Growth Factor (IGF) Activity by Insulin-like Growth Factor Binding Proteins (IGFBPs)	0.0385232	1.41428
Disease Ontology	multiple myeloma	0.0424146	1.37248
Disease Ontology	vascular hemostatic disease	0.0435439	1.36107
Pathway Commons	BCR signaling pathway	0.0451974	1.34489
MSigDB Pathway	Genes involved in Semaphorin interactions	0.0459216	1.33798
MSigDB Pathway	Genes involved in Signaling by VEGF	0.0477721	1.32083
Pathway Commons	Validated targets of C-MYC transcriptional repression	0.0486818	1.31263
MSigDB Predicted Promoter Motifs	Motif NNRGGTCATWGGGGTSANG matches PPARA: peroxisome proliferative activated receptor, alpha	0.0489367	1.31037
MSigDB Pathway	Integrin Signaling Pathway	0.0499363	1.30158

## Sheet: Cluster6_GREAT_wgBkg.txt
Ewings ChIP Cluster 6
# GREAT version 1.7.0	Species assembly: hg18
# Ontology	Term Name	Hyper FDR Q-Val	-log10(q)
MSigDB Perturbation	Genes up-regulated in response to both hypoxia and overexpression of an active form of HIF1A [Gene ID=3091].	8.85888e-21	20.0526
GO Biological Process	vasculature development	1.07795e-18	17.9674
GO Biological Process	blood vessel development	1.18776e-18	17.9253
GO Biological Process	blood vessel morphogenesis	3.54669e-18	17.4502
GO Biological Process	anatomical structure formation involved in morphogenesis	1.26081e-17	16.8994
MGI Expression: Detected	TS15_arterial system	3.27243e-16	15.4851
MGI Expression: Detected	TS15_cardiovascular system	4.49408e-16	15.3474
Mouse Phenotype	abnormal angiogenesis	1.44795e-14	13.8392
MSigDB Perturbation	Genes up-regulated in UB27 cells (osteosarcoma) at any time point after inducing the expression of a mutant form of WT1 [Gene ID=7490].	1.93504e-14	13.7133
GO Biological Process	angiogenesis	2.08708e-14	13.6805
Mouse Phenotype	abnormal artery morphology	6.02148e-13	12.2203
MSigDB Perturbation	Genes specifically up-regulated in Cluster IIb of urothelial cell carcinom (UCC) tumors.	6.18458e-13	12.2087
MSigDB Perturbation	Genes up-regulated in monocyte-derived dendritic cells (MDDC) after stimulation with galecin-1 (lectin, LGALS1) [Gene ID=3956] compared to that with bacterial lipopolysaccharide (LPS).	6.44858e-13	12.1905
Mouse Phenotype	abnormal vascular development	6.65235e-13	12.177
MSigDB Perturbation	Genes selected in supervised analyses to discriminate cells expressing activated HRAS [Gene ID=3265] oncogene from control cells expressing GFP.	1.62368e-12	11.7895
MSigDB Perturbation	Genes whose expression peaked at 480 min after stimulation of HeLa cells with EGF [Gene ID=1950].	2.23768e-12	11.6502
Mouse Phenotype	abnormal aorta morphology	3.45775e-12	11.4612
Mouse Phenotype	abnormal blood vessel physiology	6.42618e-12	11.192
Mouse Phenotype	abnormal artery development	6.87185e-11	10.1629
Mouse Phenotype	abnormal dorsal aorta morphology	3.39061e-10	9.46972
MGI Expression: Detected	TS28_skeleton	4.30819e-09	8.3657
miRNA Targets	Genes that were down-regulated in L7-A549 cells following let-7a-3 transfection	4.72716e-09	8.3254
MSigDB Perturbation	Genes up-regulated in UB27 cells (osteosarcoma) at 8 hr after inducing the expression of a mutant form of WT1 [Gene ID=7490].	4.87801e-09	8.31176
GO Biological Process	regulation of cellular component movement	1.16808e-08	7.93253
Mouse Phenotype	abnormal response to injury	1.31289e-08	7.88177
GO Biological Process	regulation of cell migration	1.52525e-08	7.81666
MGI Expression: Detected	TS15_dorsal aorta	1.53848e-08	7.81291
MGI Expression: Detected	TS19_arterial system	1.79732e-08	7.74537
MGI Expression: Detected	TS28_bone	2.03413e-08	7.69162
MGI Expression: Detected	TS13_extraembryonic component	2.22721e-08	7.65224
MSigDB Pathway	Genes involved in Hemostasis	2.36102e-08	7.6269
MSigDB Perturbation	Genes down-regulated in hematopoietic stem cells (HSC, CD34+ [Gene ID=947]) cultured in a three-dimentional collagen gel compared to the cells grown in suspension.	2.65539e-08	7.57587
MSigDB Perturbation	Genes up-regulated in hematopoietic stem cells (HSC, CD34+ [Gene ID=947]) cultured in a three-dimentional collagen gel compared to the cells grown in suspension.	2.65539e-08	7.57587
MSigDB Pathway	Focal adhesion	2.75418e-08	7.56001
GO Biological Process	regulation of locomotion	3.83369e-08	7.41638
Mouse Phenotype	abnormal vitelline vasculature	4.1032e-08	7.38688
MSigDB Perturbation	Genes up-regulated in circulating endothelial cells (CEC) from cancer patients compared to those from healthy donors.	5.54173e-08	7.25635
MSigDB Perturbation	Genes up-regulated in MCF7 cells (breast cancer) after stimulation with NRG1 [Gene ID=3084].	5.63399e-08	7.24918
MGI Expression: Detected	TS28_bone marrow	7.13055e-08	7.14688
GO Biological Process	vasculogenesis	8.05303e-08	7.09404
GO Cellular Component	cell-substrate junction	1.08041e-07	6.96641
GO Cellular Component	focal adhesion	1.13293e-07	6.9458
MGI Expression: Detected	TS19_dorsal aorta	1.35639e-07	6.86762
GO Cellular Component	cell-substrate adherens junction	1.43554e-07	6.84298
MGI Expression: Detected	TS13_cardiovascular system	1.69049e-07	6.77199
MSigDB Perturbation	Genes up-regulated in ACC3 cells (adenoid cystic carcinoma) after knockdown of SOX4 [Gene ID=6659] by RNAi.	1.69079e-07	6.77191
Disease Ontology	arteriopathy	1.72263e-07	6.76381
MGI Expression: Detected	TS13_arterial system	2.12114e-07	6.67343
Pathway Commons	Insulin Pathway	2.95729e-07	6.52911
Pathway Commons	Arf6 signaling events	2.95729e-07	6.52911
Pathway Commons	Arf6 trafficking events	2.95729e-07	6.52911
Pathway Commons	Signaling events mediated by VEGFR1 and VEGFR2	4.2642e-07	6.37016
Disease Ontology	myeloid leukemia	4.8493e-07	6.31432
MSigDB Perturbation	Genes whose expression peaked at 120 min after stimulation of HeLa cells with EGF [Gene ID=1950].	4.98487e-07	6.30235
Disease Ontology	colonic neoplasm	5.22429e-07	6.28197
GO Biological Process	positive regulation of locomotion	6.4419e-07	6.19099
Mouse Phenotype	abnormal yolk sac morphology	8.02164e-07	6.09574
Disease Ontology	ovarian neoplasm	1.17664e-06	5.92936
Mouse Phenotype	abnormal erythropoiesis	1.4338e-06	5.84351
GO Biological Process	regulation of cell adhesion	1.47315e-06	5.83175
MGI Expression: Detected	TS15_venous system	1.5107e-06	5.82082
MSigDB Perturbation	Genes up-regulated in MCF7 cells (breast cancer) after stimulation with EGF [Gene ID=1950].	1.70095e-06	5.76931
GO Biological Process	positive regulation of cellular component movement	1.72544e-06	5.7631
MSigDB Perturbation	Genes regulated by hypoxia, based on literature searches.	1.83398e-06	5.73661
Disease Ontology	malignant tumor of colon	1.84277e-06	5.73453
Disease Ontology	arteriosclerosis	2.10125e-06	5.67752
Disease Ontology	arterial occlusive disease	2.26078e-06	5.64574
MSigDB Perturbation	Genes up-regulated in papillary thyroid carcinoma (PTC) compared to normal tissue.	2.32159e-06	5.63421
Mouse Phenotype	abnormal mononuclear phagocyte morphology	2.43213e-06	5.61401
MGI Expression: Detected	TS15_extraembryonic component	2.73071e-06	5.56373
GO Biological Process	positive regulation of cell migration	3.27035e-06	5.48541
Disease Ontology	atherosclerosis	3.9916e-06	5.39885
Pathway Commons	Cell surface interactions at the vascular wall	6.64358e-06	5.1776
Pathway Commons	TNF receptor signaling pathway	7.08242e-06	5.14982
Disease Ontology	malignant neoplasm of ovary	1.05228e-05	4.97787
Mouse Phenotype	abnormal vascular branching morphogenesis	1.12477e-05	4.94894
Pathway Commons	Hemostasis	1.13476e-05	4.9451
Disease Ontology	muscle tissue neoplasm	1.55743e-05	4.80759
Disease Ontology	urologic neoplasm	1.70647e-05	4.7679
Mouse Phenotype	abnormal hematopoietic system physiology	2.18761e-05	4.66003
MSigDB Pathway	Genes involved in Signaling in Immune system	2.26229e-05	4.64545
MSigDB Pathway	Genes involved in Formation of Platelet plug	2.31698e-05	4.63508
MGI Expression: Detected	TS13_dorsal aorta	2.41584e-05	4.61693
GO Biological Process	regulation of protein amino acid phosphorylation	2.55567e-05	4.5925
MGI Expression: Detected	TS13_extraembryonic component;cardiovascular system	2.89723e-05	4.53802
Mouse Phenotype	abnormal megakaryocyte progenitor cell morphology	4.12636e-05	4.38443
Mouse Phenotype	anemia	4.8086e-05	4.31798
PANTHER Pathway	Angiogenesis	6.2915e-05	4.20125
GO Biological Process	regulation of gene-specific transcription from RNA polymerase II promoter	7.48028e-05	4.12608
MSigDB Perturbation	Genes known to be induced by hypoxia	7.50102e-05	4.12488
Pathway Commons	Sphingosine 1-phosphate (S1P) pathway	7.72206e-05	4.11227
Pathway Commons	HIF-1-alpha transcription factor network	7.79596e-05	4.10813
Mouse Phenotype	abnormal wound healing	8.1929e-05	4.08656
MSigDB Perturbation	Transcripts depleted from pseudopodia of NIH/3T3 cells (fibroblast) in response to haptotactic migratory stimulus by fibronectin, FN1 [Gene ID=2335].	8.42115e-05	4.07463
MSigDB Pathway	Genes involved in Platelet Activation	9.32552e-05	4.03033
GO Biological Process	regulation of angiogenesis	0.000101529	3.99341
Pathway Commons	Formation of Platelet plug	0.000104976	3.97891
Pathway Commons	Direct p53 effectors	0.000113597	3.94463
Mouse Phenotype	abnormal hepatobiliary system development	0.000147395	3.83152
Mouse Phenotype	abnormal embryonic hematopoiesis	0.000249618	3.60272
MGI Expression: Detected	TS24_metanephros;excretory component	0.000257097	3.5899
PANTHER Pathway	Integrin signalling pathway	0.00027413	3.56204
GO Biological Process	regulation of binding	0.000282591	3.54884
Disease Ontology	peripheral vascular disease	0.000322556	3.49139
GO Cellular Component	basement membrane	0.00034395	3.46351
MSigDB Predicted Promoter Motifs	Motif KRCAGGAARTRNKT matches ETS2: v-ets erythroblastosis virus E26 oncogene homolog 2 (avian)	0.000372404	3.42899
Disease Ontology	osteosarcoma of bone	0.000399836	3.39812
InterPro	SH2 motif	0.000576482	3.23921
Pathway Commons	TGFBR	0.000648228	3.18827
InterPro	Zinc finger, LIM-type	0.000698447	3.15587
MSigDB Pathway	Genes involved in Integrin cell surface interactions	0.000727484	3.13818
Disease Ontology	cervix carcinoma	0.000819533	3.08643
Pathway Commons	Hypoxic and oxygen homeostasis regulation of HIF-1-alpha	0.000893889	3.04872
Disease Ontology	astrocytoma	0.00101994	2.99142
PANTHER Pathway	PDGF signaling pathway	0.0011182	2.95148
MGI Expression: Detected	TS15_yolk sac	0.00113363	2.94553
MGI Expression: Detected	TS15_heart;endocardial lining#	0.00114725	2.94034
MSigDB Pathway	Keratinocyte Differentiation	0.00124812	2.90374
Pathway Commons	p53 pathway	0.00125217	2.90234
Disease Ontology	hepatobiliary disease	0.00132049	2.87926
Pathway Commons	CXCR4-mediated signaling events	0.00140188	2.85329
Disease Ontology	malignant primary brain tumor	0.001536	2.81361
MSigDB miRNA Motifs	Targets of MicroRNA AGGGCAG,MIR-18A	0.00173151	2.76158
PANTHER Pathway	Histamine H1 receptor mediated signaling pathway	0.00181111	2.74206
Disease Ontology	DNA virus infectious disease	0.0018486	2.73316
Pathway Commons	VEGFR1 specific signals	0.00188463	2.72477
MSigDB Predicted Promoter Motifs	Motif YRNCAGGAAGYRNSTBDS matches ELF2: E74-like factor 2 (ets domain transcription factor)	0.00192762	2.71498
MSigDB Pathway	Actions of Nitric Oxide in the Heart	0.00231528	2.6354
MSigDB Pathway	Integrin Signaling Pathway	0.00245971	2.60912
Pathway Commons	BCR signaling pathway	0.00252659	2.59747
GO Biological Process	regulation of smooth muscle cell proliferation	0.00274187	2.56195
MSigDB Predicted Promoter Motifs	Motif NNNNKGGRAANTCCCN (no known TF)	0.00331015	2.48015
MSigDB Perturbation	Genes down-regulated in hepatocellular carcinoma (HCC) compared to normal liver samples.	0.00347944	2.45849
Pathway Commons	TCR signaling in na&#xef;ve CD8+ T cells	0.0039385	2.40467
GO Cellular Component	actomyosin	0.00431312	2.36521
PANTHER Pathway	VEGF signaling pathway	0.00519921	2.28406
MSigDB Pathway	Genes involved in Platelet degranulation	0.00546656	2.26229
Disease Ontology	dsDNA virus infectious disease	0.0055181	2.25821
GO Cellular Component	platelet alpha granule	0.00595988	2.22476
Pathway Commons	IL2-mediated signaling events	0.00635182	2.1971
MSigDB Perturbation	Genes down-regulated in H1975 cells (non-small cell lung cancer, NSCLC) resistant to gefitinib [PubChem=123631] after treatment with EGFR inhibitor CL-387785 [PubChem=2776] for 6h.	0.00766353	2.11557
Pathway Commons	Androgen-mediated signaling	0.00854963	2.06805
MGI Expression: Detected	TS14_blood vessel#	0.00902385	2.04461
InterPro	Spectrin repeat	0.0092654	2.03314
GO Molecular Function	vascular endothelial growth factor receptor activity	0.00928763	2.0321
MSigDB Pathway	VEGF, Hypoxia, and Angiogenesis	0.00934364	2.02948
InterPro	TNFR/CD27/30/40/95 cysteine-rich region	0.00943314	2.02534
MSigDB Pathway	Cadmium induces DNA synthesis and proliferation in macrophages	0.0101504	1.99352
Disease Ontology	liver disease	0.01086	1.96417
InterPro	IRSp53/MIM homology domain (IMD)	0.0108986	1.96263
GO Biological Process	positive regulation of smooth muscle cell proliferation	0.0110423	1.95694
GO Molecular Function	type I transforming growth factor beta receptor binding	0.0119371	1.9231
GO Molecular Function	semaphorin receptor activity	0.0119371	1.9231
PANTHER Pathway	Apoptosis signaling pathway	0.0122858	1.9106
GO Cellular Component	ruffle	0.0132381	1.87818
GO Cellular Component	secretory granule membrane	0.0136026	1.86638
MSigDB Pathway	Pertussis toxin-insensitive CCR5 Signaling in Macrophage	0.0138677	1.858
GO Molecular Function	low-density lipoprotein binding	0.0160604	1.79424
GO Molecular Function	Rho GTPase activator activity	0.0161575	1.79163
GO Molecular Function	transforming growth factor beta receptor binding	0.0163168	1.78736
MSigDB Pathway	Links between Pyk2 and Map Kinases	0.0188566	1.72454
MSigDB Pathway	METS affect on Macrophage Differentiation	0.0200459	1.69797
MGI Expression: Detected	TS20_primordial germ cells	0.0216436	1.66467
GO Molecular Function	collagen binding	0.0217029	1.66348
MSigDB miRNA Motifs	Targets of MicroRNA CGTCTTA,MIR-208	0.0231432	1.63558
GO Cellular Component	clathrin-coated endocytic vesicle membrane	0.024304	1.61432
PANTHER Pathway	Thyrotropin-releasing hormone receptor signaling pathway	0.0249418	1.60307
Mouse Phenotype	decreased inflammatory response	0.0255157	1.59319
MSigDB Pathway	Neuropeptides VIP and PACAP inhibit the apoptosis of activated T cells	0.0273113	1.56366
GO Molecular Function	RNA polymerase II transcription factor activity, enhancer binding	0.0296896	1.5274
MSigDB Pathway	Oxidative Stress Induced Gene Expression Via Nrf2	0.0322736	1.49115
Transcription Factor Targets	Primary targets of p53: genes that were up-regulated under the induction of p53 and inhibition of protein synthesis by cycloheximide in H1299Val135 cells	0.0344479	1.46284
HGNC Gene Families	KLF	0.0359039	1.44486
MSigDB miRNA Motifs	Targets of MicroRNA ACAACCT,MIR-453	0.0370429	1.43129
GO Biological Process	response to inorganic substance	0.0375351	1.42556
MSigDB Pathway	Bladder cancer	0.038576	1.41368
MSigDB Pathway	Signaling Pathway from G-Protein Families	0.0392437	1.40623
GO Cellular Component	vesicle lumen	0.0399296	1.39871
MSigDB Pathway	T Cell Receptor Signaling Pathway	0.0454777	1.3422
