# Supplementary material for: Tumor-specific retargeting of an oncogenic transcription factor chimera results in dysregulation of chromatin and transcription
Source: HighWire-hosted journal article supplement (doi:10.1101/gr.125666.111), 2011-11-15
Supplement: PatelSimon_TableS6.xlsx [file PatelSimon_TableS6.xlsx]

## Sheet: EWS502 H3K4me1 peaks
chr10	115245	115626
chr10	148259	148569
chr10	151234	151660
chr10	164051	164448
chr10	165971	166477
chr10	167113	167782
chr10	168249	168879
chr10	172248	172692
chr10	175737	176112
chr10	196880	197243
chr10	261661	262030
chr10	271367	271874
chr10	342402	343282
chr10	350078	350819
chr10	352166	352951
chr10	362079	362481
chr10	365140	365461
chr10	405597	406087
chr10	410261	410675
chr10	413448	413835
chr10	418475	418849
chr10	446787	447302
chr10	490891	491291
chr10	517118	517499
chr10	521162	521501
chr10	547084	547452
chr10	553242	553652
chr10	561822	562317
chr10	577449	578364
chr10	579799	580327
chr10	582944	584081
chr10	590315	591005
chr10	637971	639057
chr10	656846	657936
chr10	669482	670596
chr10	687077	687511
chr10	696868	697564
chr10	705918	706462
chr10	719405	719763
chr10	723003	723908
chr10	735644	736311
chr10	811864	812162
chr10	813791	814141
chr10	849269	849702
chr10	873402	873779
chr10	875830	876608
chr10	906188	906653
chr10	925097	925502
chr10	930650	931056
chr10	931853	932203
chr10	946701	947062
chr10	954253	954573
chr10	974996	975419
chr10	991648	992420
chr10	1006614	1007131
chr10	1009789	1010433
chr10	1023256	1023633
chr10	1025369	1026159
chr10	1071355	1072125
chr10	1078391	1078775
chr10	1080050	1080663
chr10	1086492	1086911
chr10	1090763	1091132
chr10	1093973	1094604
chr10	1095596	1096175
chr10	1099053	1100299
chr10	1106918	1107323
chr10	1124903	1125458
chr10	1137818	1138395
chr10	1146374	1147122
chr10	1158050	1158682
chr10	1159874	1160402
chr10	1207887	1208245
chr10	1286724	1287811
chr10	1289088	1289484
chr10	1319885	1320424
chr10	1320538	1320912
chr10	1326496	1326967
chr10	1348203	1348676
chr10	1357279	1357696
chr10	1410575	1411029
chr10	1433506	1434195
chr10	1500316	1500885
chr10	1516389	1516786
chr10	1540251	1540636
chr10	1542465	1542902
chr10	1557467	1558711
chr10	1585547	1585874
chr10	1632975	1633305
chr10	1664301	1665081
chr10	1700553	1701550
chr10	1720181	1721225
chr10	1740918	1741370
chr10	1742466	1744125
chr10	1759312	1759796
chr10	1772518	1772929
chr10	1787109	1787525
chr10	1797243	1797725
chr10	1826508	1826911
chr10	1854421	1854756
chr10	1879881	1880261
chr10	1890687	1891119
chr10	1892121	1893071
chr10	1922693	1923093
chr10	1923704	1924311
chr10	1928299	1928657
chr10	1929437	1929806
chr10	1955844	1956597
chr10	1957679	1958060
chr10	1960590	1961049
chr10	1974630	1975109
chr10	1975806	1976240
chr10	1998922	1999378
chr10	2000937	2001336
chr10	2001856	2002150
chr10	2010723	2011399
chr10	2044407	2044871
chr10	2045972	2046458
chr10	2049445	2050305
chr10	2051957	2054250
chr10	2055940	2056536
chr10	2057308	2057699
chr10	2077795	2078431
chr10	2091382	2092002
chr10	2169921	2170289
chr10	2173726	2173874
chr10	2209636	2210571
chr10	2212053	2212347
chr10	2212447	2212823
chr10	2218894	2219294
chr10	2234613	2234993
chr10	2243263	2243896
chr10	2246312	2246816
chr10	2246842	2247677
chr10	2252218	2252642
chr10	2254127	2254509
chr10	2257445	2257914
chr10	2310625	2311031
chr10	2312028	2312423
chr10	2316110	2316589
chr10	2318170	2318737
chr10	2394557	2394996
chr10	2395716	2396134
chr10	2399811	2400619
chr10	2406379	2406707
chr10	2411394	2411926
chr10	2437835	2438373
chr10	2471605	2472064
chr10	2477074	2477309
chr10	2478880	2479326
chr10	2515890	2516273
chr10	2519054	2519926
chr10	2520532	2521091
chr10	2522261	2522890
chr10	2532933	2533249
chr10	2535952	2536389
chr10	2538567	2539044
chr10	2558381	2558901
chr10	2560187	2560840
chr10	2561424	2561782
chr10	2568732	2569127
chr10	2571984	2572346
chr10	2572976	2573334
chr10	2623831	2624723
chr10	2624876	2625280
chr10	2634662	2635074
chr10	2643104	2643542
chr10	2643675	2644438
chr10	2650420	2650837
chr10	2652408	2652598
chr10	2653536	2654066
chr10	2654770	2655148
chr10	2691110	2691665
chr10	2696744	2697092
chr10	2700737	2700953
chr10	2703043	2703323
chr10	2714165	2714606
chr10	2763956	2764356
chr10	2777086	2777469
chr10	2798194	2798596
chr10	2830552	2830987
chr10	2850453	2850878
chr10	2867935	2868294
chr10	2883813	2884174
chr10	2894108	2894625
chr10	2905426	2906214
chr10	2913225	2913719
chr10	2917679	2918026
chr10	2923166	2923638
chr10	2940977	2941386
chr10	2957938	2958285
chr10	2968339	2969201
chr10	3006992	3007403
chr10	3009731	3010110
chr10	3011373	3011808
chr10	3013438	3014094
chr10	3018625	3018955
chr10	3041021	3041664
chr10	3042454	3042893
chr10	3047395	3048125
chr10	3076049	3076464
chr10	3078934	3079261
chr10	3086492	3087027
chr10	3101332	3102047
chr10	3103760	3103992
chr10	3104958	3105521
chr10	3126244	3126605
chr10	3173648	3174028
chr10	3202761	3203446
chr10	3225697	3226012
chr10	3229732	3230085
chr10	3235530	3235844
chr10	3273645	3274587
chr10	3345911	3346497
chr10	3347215	3347615
chr10	3356630	3356975
chr10	3365710	3366278
chr10	3367573	3368263
chr10	3372055	3372353
chr10	3373033	3373383
chr10	3514370	3514657
chr10	3570861	3571542
chr10	3700523	3700920
chr10	3702874	3703765
chr10	3776547	3776882
chr10	3782125	3782601
chr10	3798123	3798597
chr10	3811992	3813214
chr10	3814749	3815128
chr10	3817973	3818534
chr10	3818884	3819281
chr10	3835055	3835451
chr10	3835623	3836012
chr10	3836505	3836779
chr10	3838789	3839365
chr10	3842130	3842632
chr10	3860554	3860959
chr10	3861733	3862014
chr10	3862698	3863158
chr10	4164162	4164558
chr10	4233878	4234472
chr10	4376046	4376481
chr10	4639810	4640176
chr10	4682730	4683124
chr10	4685303	4685694
chr10	4687516	4687950
chr10	4694716	4695250
chr10	4710574	4711469
chr10	4717850	4718170
chr10	4719652	4720051
chr10	4721688	4722225
chr10	4723741	4724109
chr10	4727960	4728502
chr10	4728903	4730121
chr10	4735581	4735964
chr10	4736833	4737534
chr10	4738096	4738470
chr10	4740198	4740592
chr10	4749778	4750533
chr10	4781235	4781632
chr10	4812710	4813109
chr10	4814246	4814718
chr10	4833740	4834149
chr10	4841761	4842138
chr10	4843699	4844774
chr10	4844862	4845006
chr10	4847041	4847759
chr10	4852654	4852973
chr10	4858905	4859607
chr10	4860193	4860520
chr10	4869662	4870257
chr10	4881621	4882064
chr10	4919829	4920208
chr10	4925624	4927118
chr10	4934964	4935343
chr10	4990102	4990539
chr10	5067476	5067839
chr10	5072353	5073528
chr10	5076008	5076831
chr10	5103428	5103766
chr10	5108092	5108386
chr10	5111231	5111630
chr10	5266436	5266856
chr10	5316123	5316878
chr10	5324071	5324695
chr10	5325990	5326544
chr10	5328601	5329175
chr10	5331267	5331687
chr10	5349732	5349901
chr10	5416094	5416479
chr10	5427548	5428031
chr10	5429659	5430052
chr10	5443583	5444066
chr10	5474002	5474930
chr10	5478148	5479224
chr10	5481848	5482255
chr10	5498019	5499320
chr10	5585939	5586253
chr10	5592452	5593072
chr10	5604298	5604981
chr10	5605400	5605849
chr10	5617355	5617641
chr10	5626590	5627010
chr10	5677640	5678086
chr10	5686104	5686992
chr10	5704923	5705257
chr10	5710682	5710916
chr10	5725624	5726061
chr10	5727354	5727848
chr10	5744851	5745334
chr10	5745821	5746910
chr10	5748493	5749250
chr10	5766246	5766726
chr10	5769370	5769885
chr10	5818768	5819840
chr10	5856189	5856796
chr10	5857664	5858030
chr10	5859071	5859427
chr10	5887399	5887811
chr10	5895675	5896453
chr10	5944881	5945662
chr10	5958188	5958597
chr10	5960105	5960401
chr10	5969685	5970010
chr10	5972749	5973080
chr10	6027852	6028444
chr10	6032401	6033014
chr10	6035652	6036054
chr10	6058336	6059436
chr10	6068479	6068883
chr10	6082041	6082219
chr10	6105698	6106116
chr10	6132518	6133489
chr10	6149438	6149858
chr10	6165260	6166223
chr10	6168110	6168491
chr10	6177607	6177973
chr10	6202471	6203162
chr10	6206774	6207064
chr10	6207717	6208078
chr10	6209921	6210827
chr10	6227793	6228791
chr10	6244562	6244954
chr10	6246162	6246558
chr10	6250038	6250418
chr10	6250859	6251748
chr10	6252530	6252903
chr10	6266884	6267438
chr10	6282629	6283508
chr10	6284497	6284726
chr10	6286746	6287135
chr10	6290731	6291306
chr10	6293301	6293545
chr10	6300735	6301402
chr10	6303836	6304375
chr10	6357281	6357625
chr10	6360640	6361143
chr10	6361862	6362227
chr10	6373017	6373452
chr10	6374306	6374772
chr10	6375161	6375525
chr10	6378894	6379951
chr10	6382280	6382825
chr10	6384796	6385166
chr10	6387200	6387596
chr10	6388890	6389322
chr10	6390303	6390865
chr10	6393978	6394202
chr10	6395759	6396143
chr10	6396624	6397379
chr10	6424233	6426696
chr10	6428911	6429974
chr10	6463377	6465107
chr10	6481718	6482276
chr10	6483432	6483742
chr10	6513272	6513691
chr10	6548443	6549420
chr10	6580052	6580724
chr10	6659890	6660737
chr10	7607563	7608146
chr10	7612920	7613358
chr10	7674127	7674816
chr10	7820498	7820884
chr10	7828485	7829133
chr10	7829456	7829777
chr10	7831760	7832086
chr10	7832445	7832824
chr10	7871416	7871832
chr10	7899599	7899946
chr10	7939231	7939626
chr10	7950154	7950614
chr10	7955380	7955710
chr10	7969774	7970171
chr10	7976754	7977112
chr10	7996742	7997635
chr10	8023264	8023670
chr10	8025093	8025222
chr10	8025332	8025714
chr10	8027242	8027875
chr10	8029315	8030255
chr10	8126957	8127450
chr10	8128284	8128673
chr10	8129377	8129741
chr10	8130491	8130875
chr10	8134121	8134989
chr10	8141440	8141731
chr10	8240394	8240734
chr10	8262645	8263279
chr10	8326836	8327250
chr10	8377632	8378170
chr10	8380861	8381294
chr10	8382313	8383112
chr10	8394283	8395554
chr10	8535664	8535956
chr10	8560576	8561334
chr10	8562713	8563280
chr10	8564788	8565173
chr10	8566084	8566471
chr10	8584750	8585179
chr10	8586405	8586790
chr10	8588943	8589315
chr10	8590665	8591084
chr10	8592932	8593428
chr10	8594563	8595315
chr10	8597869	8598179
chr10	8598530	8599012
chr10	9291083	9291431
chr10	9295412	9296400
chr10	10376707	10377191
chr10	11289127	11289776
chr10	11352200	11352784
chr10	11529502	11530683
chr10	11555237	11555848
chr10	11562455	11563042
chr10	11592710	11593128
chr10	11594069	11594592
chr10	11610742	11611173
chr10	11629107	11629653
chr10	11634716	11635479
chr10	11639542	11639920
chr10	11666324	11666642
chr10	11682084	11682454
chr10	11691436	11692041
chr10	11707059	11707563
chr10	11710255	11710719
chr10	11728448	11728831
chr10	11730273	11730934
chr10	11736575	11737082
chr10	11743475	11743899
chr10	11744316	11745025
chr10	11755029	11755442
chr10	11760239	11760591
chr10	11764902	11765399
chr10	11768405	11768527
chr10	11839368	11840151
chr10	11845498	11846100
chr10	11855494	11855866
chr10	11881676	11882125
chr10	11884487	11884898
chr10	11889908	11890318
chr10	11896101	11896476
chr10	11906468	11907976
chr10	11910817	11911262
chr10	11912788	11913153
chr10	11956483	11957999
chr10	12016208	12016642
chr10	12125784	12126237
chr10	12132737	12133215
chr10	12134594	12134913
chr10	12135561	12135970
chr10	12138677	12139375
chr10	12144831	12145687
chr10	12151568	12151912
chr10	12152697	12153014
chr10	12163321	12163828
chr10	12171117	12171260
chr10	12211174	12211556
chr10	12268370	12268762
chr10	12273355	12273793
chr10	12275638	12276107
chr10	12295047	12295518
chr10	12295899	12297030
chr10	12300917	12301276
chr10	12303799	12304288
chr10	12345971	12346836
chr10	12404999	12405602
chr10	12432097	12433026
chr10	12482712	12483086
chr10	12558651	12559258
chr10	12565985	12566535
chr10	12567807	12568194
chr10	12592460	12592846
chr10	12643112	12643656
chr10	12789438	12789770
chr10	12790059	12790666
chr10	12865207	12865642
chr10	12907454	12907829
chr10	13001601	13001934
chr10	13061964	13062720
chr10	13180764	13182217
chr10	13182354	13182879
chr10	13241835	13242655
chr10	13244358	13244926
chr10	13354091	13354503
chr10	13374157	13374630
chr10	13381204	13381462
chr10	13381963	13382949
chr10	13383918	13384315
chr10	13420359	13420762
chr10	13421492	13421858
chr10	13425195	13425528
chr10	13428319	13428777
chr10	13432144	13432509
chr10	13521311	13523000
chr10	13637857	13638679
chr10	13669741	13670350
chr10	13696705	13697056
chr10	13742040	13742755
chr10	13753876	13754351
chr10	13755340	13755758
chr10	13766191	13766928
chr10	13767568	13767924
chr10	13782926	13783247
chr10	13789478	13790060
chr10	13794786	13795108
chr10	13799965	13800298
chr10	13832280	13832939
chr10	13839642	13840174
chr10	13869136	13869535
chr10	13869913	13870311
chr10	14156373	14156746
chr10	14171050	14171687
chr10	14329565	14329946
chr10	14409574	14410002
chr10	14456447	14457183
chr10	14579215	14580028
chr10	14636401	14636722
chr10	14637508	14638430
chr10	14642675	14643719
chr10	14647097	14647477
chr10	14656401	14656806
chr10	14661596	14662493
chr10	14664574	14665057
chr10	14670364	14670804
chr10	14684027	14684428
chr10	14686603	14687291
chr10	14696820	14697114
chr10	14698509	14699034
chr10	14699544	14700046
chr10	14703481	14703891
chr10	14705220	14705800
chr10	14707326	14707767
chr10	14730435	14730894
chr10	14831236	14831660
chr10	14833985	14834498
chr10	14921457	14922237
chr10	14940723	14941593
chr10	14964215	14964719
chr10	14969678	14970793
chr10	14974318	14974797
chr10	14976639	14977053
chr10	14978034	14978397
chr10	15034955	15035296
chr10	15036171	15036568
chr10	15040683	15041823
chr10	15041733	15042396
chr10	15108949	15109715
chr10	15165908	15166731
chr10	15178255	15179331
chr10	15180495	15180624
chr10	15222502	15223091
chr10	15248538	15249414
chr10	15251377	15251932
chr10	15253014	15253660
chr10	15263705	15264684
chr10	15277152	15277250
chr10	15278004	15278578
chr10	15366990	15367440
chr10	15372639	15373000
chr10	15376250	15376380
chr10	15395676	15396367
chr10	15407577	15407987
chr10	15427090	15427779
chr10	15435574	15436295
chr10	15441691	15442027
chr10	15449296	15449658
chr10	15457138	15457523
chr10	15468892	15469484
chr10	15488764	15489218
chr10	15516577	15517124
chr10	15521502	15521930
chr10	15555914	15556689
chr10	15596892	15597650
chr10	15637326	15637772
chr10	15653478	15653876
chr10	15739856	15740987
chr10	15785695	15786114
chr10	15802440	15803500
chr10	15807356	15807944
chr10	15896555	15897027
chr10	15897896	15898297
chr10	15901439	15901838
chr10	15938707	15939119
chr10	15942561	15942944
chr10	15960273	15960851
chr10	16518228	16518694
chr10	16519363	16519758
chr10	16648331	16648648
chr10	16824167	16824785
chr10	16825704	16826010
chr10	16898125	16898646
chr10	16910002	16911462
chr10	16914034	16914419
chr10	16968472	16969082
chr10	17024981	17025422
chr10	17026274	17026684
chr10	17027654	17027763
chr10	17034633	17034991
chr10	17036431	17036751
chr10	17048140	17048592
chr10	17068111	17068946
chr10	17071568	17072302
chr10	17077801	17078292
chr10	17078728	17079065
chr10	17088767	17089202
chr10	17103729	17104123
chr10	17104450	17104822
chr10	17106394	17106990
chr10	17107592	17108312
chr10	17110887	17111232
chr10	17115031	17115451
chr10	17116347	17116779
chr10	17145135	17145577
chr10	17161591	17162335
chr10	17195874	17196294
chr10	17197248	17197591
chr10	17208908	17209287
chr10	17216365	17217061
chr10	17229454	17229890
chr10	17273021	17273369
chr10	17281215	17281589
chr10	17283710	17284062
chr10	17288493	17289056
chr10	17298573	17299199
chr10	17300173	17300462
chr10	17303214	17303446
chr10	17308687	17309531
chr10	17312349	17313400
chr10	17339495	17339863
chr10	17430388	17430760
chr10	17510410	17511143
chr10	17534978	17535525
chr10	17644396	17644666
chr10	17645724	17646492
chr10	17662467	17662881
chr10	17668407	17669234
chr10	17689538	17690217
chr10	17698274	17698694
chr10	17699578	17699906
chr10	17724224	17725480
chr10	17737822	17738500
chr10	17742505	17742973
chr10	17751771	17752085
chr10	17755253	17755858
chr10	17767227	17767615
chr10	17817158	17817581
chr10	18291207	18291691
chr10	18308603	18309214
chr10	18331230	18331544
chr10	18373921	18374418
chr10	18389138	18389724
chr10	18397907	18398238
chr10	18463529	18463962
chr10	18468512	18468640
chr10	18474669	18475045
chr10	18475269	18476172
chr10	18477484	18478180
chr10	18492724	18493044
chr10	18507543	18507994
chr10	18515924	18516343
chr10	18522859	18523454
chr10	18524431	18524878
chr10	18543555	18543899
chr10	18546549	18546946
chr10	18551335	18552246
chr10	18553411	18554150
chr10	18564455	18564824
chr10	18589237	18589933
chr10	18590009	18590437
chr10	18633468	18633687
chr10	18660860	18661459
chr10	18663032	18663422
chr10	18679357	18679771
chr10	18729284	18729684
chr10	18734147	18734824
chr10	18735060	18735385
chr10	18742985	18743355
chr10	18745098	18745521
chr10	18746168	18746744
chr10	18794585	18795092
chr10	18873782	18874177
chr10	18912902	18913474
chr10	18939351	18940364
chr10	18946187	18946566
chr10	18948003	18948560
chr10	18950104	18950420
chr10	18951094	18951631
chr10	18987522	18987899
chr10	18989849	18990369
chr10	19017935	19018306
chr10	19029247	19029691
chr10	19041524	19042259
chr10	19123872	19125237
chr10	19239649	19240061
chr10	19240439	19241324
chr10	19246685	19248234
chr10	19249170	19249522
chr10	19284075	19284505
chr10	19309486	19309917
chr10	19335179	19335604
chr10	19386059	19386434
chr10	19425665	19426094
chr10	19441139	19441463
chr10	19488185	19488587
chr10	19508986	19509338
chr10	19538138	19538517
chr10	19587009	19587995
chr10	19718222	19718559
chr10	19720288	19721033
chr10	19754356	19755060
chr10	19808826	19809197
chr10	19827229	19827663
chr10	19906326	19907171
chr10	19958309	19958935
chr10	20014953	20015797
chr10	20047291	20048261
chr10	20048953	20049417
chr10	20050555	20050959
chr10	20057273	20057622
chr10	20084749	20085165
chr10	20111154	20111990
chr10	20150099	20150661
chr10	20157505	20157863
chr10	20164360	20164784
chr10	20167731	20168130
chr10	20221117	20221528
chr10	20247200	20247457
chr10	20249213	20249978
chr10	20250457	20250852
chr10	20252649	20253116
chr10	20257894	20258263
chr10	20260096	20260456
chr10	20264347	20264737
chr10	20266472	20266883
chr10	20270115	20270566
chr10	20282105	20282443
chr10	20293455	20294108
chr10	20295522	20296053
chr10	20332351	20333053
chr10	20340145	20340534
chr10	20368812	20369392
chr10	20373652	20374189
chr10	20387520	20388609
chr10	20471389	20472258
chr10	20485495	20486167
chr10	20488276	20488778
chr10	20490319	20490827
chr10	20493534	20494317
chr10	20495078	20495678
chr10	20498223	20499118
chr10	20501139	20501856
chr10	20549917	20550404
chr10	20557848	20558785
chr10	20559006	20559723
chr10	20560645	20561042
chr10	20561462	20561904
chr10	20562973	20563541
chr10	20596481	20597223
chr10	20637163	20637524
chr10	20672047	20672393
chr10	20698879	20699252
chr10	20735475	20735851
chr10	20736787	20737181
chr10	20738238	20739027
chr10	20761697	20762094
chr10	20763903	20764524
chr10	20771413	20771839
chr10	20773592	20773896
chr10	20780213	20780547
chr10	20782278	20782807
chr10	20922882	20923240
chr10	20927467	20927873
chr10	20949292	20949948
chr10	21096288	21097144
chr10	21099266	21099674
chr10	21105732	21106113
chr10	21121928	21123486
chr10	21138666	21139385
chr10	21183982	21184349
chr10	21186911	21187315
chr10	21190007	21190659
chr10	21206576	21206952
chr10	21207551	21208083
chr10	21216819	21217240
chr10	21216819	21217698
chr10	21218950	21219270
chr10	21290318	21290784
chr10	21291930	21292480
chr10	21314017	21314434
chr10	21319658	21320073
chr10	21322649	21323203
chr10	21324243	21324582
chr10	21371343	21371668
chr10	21373504	21373911
chr10	21398161	21398638
chr10	21407756	21408344
chr10	21419497	21420377
chr10	21426903	21427485
chr10	21428124	21428491
chr10	21428964	21429582
chr10	21501369	21502391
chr10	21503075	21503849
chr10	21504777	21505251
chr10	21505948	21506526
chr10	21523195	21523943
chr10	21541442	21541869
chr10	21570199	21570562
chr10	21607572	21607960
chr10	21610893	21611327
chr10	21622664	21623972
chr10	21626044	21626489
chr10	21641784	21642220
chr10	21644117	21644519
chr10	21647163	21647972
chr10	21665597	21665994
chr10	21679054	21680023
chr10	21691549	21692338
chr10	21693361	21693771
chr10	21699214	21699751
chr10	21700472	21700781
chr10	21702130	21702496
chr10	21705757	21706421
chr10	21709093	21709539
chr10	21710541	21710660
chr10	21712270	21713442
chr10	21728566	21729299
chr10	21730989	21732035
chr10	21734683	21735497
chr10	21736329	21737477
chr10	21737679	21738086
chr10	21738767	21739138
chr10	21745882	21746543
chr10	21752795	21753169
chr10	21753742	21754456
chr10	21773205	21773709
chr10	21817973	21818474
chr10	21824104	21824404
chr10	21831243	21831794
chr10	21834557	21834927
chr10	21845205	21845356
chr10	21847564	21848289
chr10	21849896	21850300
chr10	21851945	21852274
chr10	21862239	21862990
chr10	21864657	21865381
chr10	21888627	21890000
chr10	21953666	21954014
chr10	21955133	21955542
chr10	21959695	21960080
chr10	21978454	21978766
chr10	21994612	21995061
chr10	22052065	22052830
chr10	22053957	22054611
chr10	22055688	22056267
chr10	22058957	22059355
chr10	22061045	22061511
chr10	22062580	22062880
chr10	22083481	22083967
chr10	22136067	22136534
chr10	22137343	22137933
chr10	22173622	22174031
chr10	22241589	22242266
chr10	22257727	22258435
chr10	22272314	22272716
chr10	22273769	22274139
chr10	22279905	22280701
chr10	22304214	22304627
chr10	22305694	22306328
chr10	22318328	22318710
chr10	22332698	22332986
chr10	22351449	22351989
chr10	22371424	22371847
chr10	22513924	22514319
chr10	22531937	22532303
chr10	22578373	22579294
chr10	22580552	22581727
chr10	22592122	22592834
chr10	22648739	22649155
chr10	22654560	22655358
chr10	22665870	22666297
chr10	22670098	22670913
chr10	22680293	22680650
chr10	22701214	22701723
chr10	22746549	22747080
chr10	22749702	22750300
chr10	22756030	22756587
chr10	22758947	22759410
chr10	22764183	22764660
chr10	22804535	22805229
chr10	22807903	22808373
chr10	22834658	22835013
chr10	22881984	22882439
chr10	22893618	22893847
chr10	22895083	22895847
chr10	22922043	22922391
chr10	22926057	22926450
chr10	22929134	22929994
chr10	22944441	22945476
chr10	22946454	22946868
chr10	22949241	22949514
chr10	22952370	22952727
chr10	22954888	22955203
chr10	22978119	22978946
chr10	22984614	22985078
chr10	23001775	23002160
chr10	23002913	23003520
chr10	23025876	23026402
chr10	23041939	23042346
chr10	23043390	23044347
chr10	23082454	23082891
chr10	23092992	23093556
chr10	23095589	23096392
chr10	23109536	23109970
chr10	23120759	23121312
chr10	23139719	23140513
chr10	23151127	23151497
chr10	23153182	23153584
chr10	23160067	23160615
chr10	23162384	23162700
chr10	23222960	23224159
chr10	23241925	23242320
chr10	23319355	23320067
chr10	23381869	23382533
chr10	23385651	23386038
chr10	23392292	23392651
chr10	23394605	23395000
chr10	23408602	23409082
chr10	23409878	23410831
chr10	23423924	23424743
chr10	23426191	23426582
chr10	23428378	23429062
chr10	23439853	23440593
chr10	23441144	23441738
chr10	23441904	23442307
chr10	23486200	23486623
chr10	23489549	23490003
chr10	23609177	23609758
chr10	23613064	23613554
chr10	23620320	23620966
chr10	23623860	23624191
chr10	23644692	23645078
chr10	23668463	23668790
chr10	23669152	23669866
chr10	23670433	23670776
chr10	23673112	23674065
chr10	23676358	23677005
chr10	23697027	23697464
chr10	23699235	23699742
chr10	23767367	23767886
chr10	23771712	23772060
chr10	23774343	23775192
chr10	23776458	23776759
chr10	23778186	23779172
chr10	23781549	23781902
chr10	23784308	23784483
chr10	23790338	23790925
chr10	23827674	23828112
chr10	23828757	23829073
chr10	23846624	23846979
chr10	23849132	23849857
chr10	23860488	23860859
chr10	23863207	23863599
chr10	23866077	23866759
chr10	23867995	23868378
chr10	23870697	23871248
chr10	23885285	23886365
chr10	23939963	23940346
chr10	23940829	23941223
chr10	23949824	23950854
chr10	23959147	23960143
chr10	23960921	23961528
chr10	23972296	23972851
chr10	23984165	23984486
chr10	23986308	23986717
chr10	24015396	24016027
chr10	24022127	24023462
chr10	24027792	24028239
chr10	24028988	24029977
chr10	24031948	24032310
chr10	24037361	24037763
chr10	24083416	24083766
chr10	24122502	24122891
chr10	24136509	24136821
chr10	24148203	24148580
chr10	24149405	24149838
chr10	24155207	24155680
chr10	24156573	24157095
chr10	24188757	24189274
chr10	24220113	24220592
chr10	24255562	24256368
chr10	24256950	24257369
chr10	24259600	24260002
chr10	24260722	24261269
chr10	24262190	24262510
chr10	24284412	24284652
chr10	24286036	24286355
chr10	24295364	24295697
chr10	24308932	24309358
chr10	24316916	24317345
chr10	24323918	24324300
chr10	24329542	24329933
chr10	24335240	24335896
chr10	24337012	24337995
chr10	24363359	24364131
chr10	24426674	24427344
chr10	24444818	24445261
chr10	24448669	24449118
chr10	24456005	24456535
chr10	24458571	24459138
chr10	24471967	24472309
chr10	24472632	24473125
chr10	24497790	24498129
chr10	24525511	24525964
chr10	24526655	24527024
chr10	24529180	24529566
chr10	24536046	24536346
chr10	24542080	24542528
chr10	24543310	24543768
chr10	24544022	24544482
chr10	24566838	24567392
chr10	24568840	24569391
chr10	24584804	24585343
chr10	24616066	24616453
chr10	24648279	24648878
chr10	24649450	24649816
chr10	24660357	24660712
chr10	24662129	24662419
chr10	24664762	24665451
chr10	24669353	24669678
chr10	24671723	24672146
chr10	24673902	24674464
chr10	24676837	24677231
chr10	24678744	24679106
chr10	24680622	24681303
chr10	24683884	24684492
chr10	24684147	24684427
chr10	24686606	24687003
chr10	24693420	24693568
chr10	24711475	24711851
chr10	24712519	24712911
chr10	24713701	24714228
chr10	24718766	24719109
chr10	24720351	24720927
chr10	24722285	24722632
chr10	24723518	24723858
chr10	24744375	24745175
chr10	24756798	24757377
chr10	24769584	24770293
chr10	24793074	24794297
chr10	24812648	24813060
chr10	24813766	24814176
chr10	24832880	24833218
chr10	24841958	24842304
chr10	24847774	24848132
chr10	24885801	24886330
chr10	24898791	24899248
chr10	24900942	24901348
chr10	24999793	25000205
chr10	25009591	25009952
chr10	25010487	25011069
chr10	25035382	25036213
chr10	25045119	25045690
chr10	25046713	25047297
chr10	25053724	25054436
chr10	25144948	25145298
chr10	25175127	25176313
chr10	25180360	25180706
chr10	25187487	25187869
chr10	25193895	25194192
chr10	25198553	25198950
chr10	25199570	25199983
chr10	25200735	25201111
chr10	25210644	25210996
chr10	25230685	25231078
chr10	25250128	25250770
chr10	25258754	25259130
chr10	25273729	25274160
chr10	25280592	25281194
chr10	25282145	25283607
chr10	25344899	25345197
chr10	25352539	25353250
chr10	25353931	25354324
chr10	25377371	25377872
chr10	25388702	25389520
chr10	25390512	25390928
chr10	25396633	25397515
chr10	25408086	25408474
chr10	25411640	25412053
chr10	25429848	25430429
chr10	25442254	25442633
chr10	25503246	25503633
chr10	25505524	25505845
chr10	25737385	25738473
chr10	25822005	25822415
chr10	25831221	25831801
chr10	25833191	25833936
chr10	25834086	25835395
chr10	25835852	25836246
chr10	25837390	25837803
chr10	25875962	25876334
chr10	25885905	25886918
chr10	25887307	25887712
chr10	25894143	25894820
chr10	25958306	25959033
chr10	26021836	26022188
chr10	26023779	26024690
chr10	26027581	26028170
chr10	26029941	26030320
chr10	26031686	26032224
chr10	26036629	26036991
chr10	26041592	26041962
chr10	26067938	26068527
chr10	26072983	26073581
chr10	26075159	26075545
chr10	26095411	26095792
chr10	26105748	26106189
chr10	26149848	26150531
chr10	26153339	26153746
chr10	26156502	26157704
chr10	26165188	26165566
chr10	26171069	26171695
chr10	26177938	26178272
chr10	26208062	26208893
chr10	26252722	26253436
chr10	26263232	26264024
chr10	26423891	26424274
chr10	26554260	26554654
chr10	26562650	26563038
chr10	26564776	26565254
chr10	26664134	26664863
chr10	26808747	26809221
chr10	26884946	26885288
chr10	26895399	26895737
chr10	26896254	26896734
chr10	26991393	26991929
chr10	26994514	26995028
chr10	26997513	26997814
chr10	26998651	26999023
chr10	27005074	27005528
chr10	27007614	27007958
chr10	27008808	27009206
chr10	27027957	27028211
chr10	27030785	27031120
chr10	27054526	27055187
chr10	27084411	27084908
chr10	27110883	27111273
chr10	27129385	27130163
chr10	27131397	27131905
chr10	27132932	27133316
chr10	27135244	27135682
chr10	27136573	27137278
chr10	27143941	27144910
chr10	27161889	27162239
chr10	27168755	27169644
chr10	27173277	27173676
chr10	27180760	27181208
chr10	27184485	27184860
chr10	27186527	27186927
chr10	27194309	27194621
chr10	27198078	27198882
chr10	27208705	27208946
chr10	27210659	27211016
chr10	27288801	27289514
chr10	27303863	27304896
chr10	27427811	27428303
chr10	27429805	27430133
chr10	27475982	27476562
chr10	27481088	27482369
chr10	27487027	27487598
chr10	27528354	27528728
chr10	27568576	27568919
chr10	27569650	27570714
chr10	27572094	27572549
chr10	27576061	27576840
chr10	27674527	27674895
chr10	27677397	27677800
chr10	27678377	27679491
chr10	27684796	27685283
chr10	27688529	27689416
chr10	27698603	27699028
chr10	27699784	27700377
chr10	27765515	27766001
chr10	27769056	27769393
chr10	27774050	27774434
chr10	27775896	27776210
chr10	27777964	27778310
chr10	27784376	27785379
chr10	27786575	27786952
chr10	27811863	27812199
chr10	27835087	27835940
chr10	27853697	27854054
chr10	27856090	27856686
chr10	27858252	27858695
chr10	27859970	27860350
chr10	27865204	27865738
chr10	27929550	27930277
chr10	27936591	27936917
chr10	27937573	27938258
chr10	27941198	27941593
chr10	27943614	27944158
chr10	27946981	27947473
chr10	27947968	27948771
chr10	27954427	27955122
chr10	27972110	27972531
chr10	27975618	27975999
chr10	27989334	27989753
chr10	28008706	28009121
chr10	28044111	28044473
chr10	28050948	28051434
chr10	28056970	28057474
chr10	28058620	28059042
chr10	28070424	28071296
chr10	28072756	28073486
chr10	28073647	28074045
chr10	28093443	28093989
chr10	28103122	28103508
chr10	28142914	28143673
chr10	28155757	28156086
chr10	28163216	28163621
chr10	28185355	28185960
chr10	28186478	28186990
chr10	28213413	28214149
chr10	28217627	28218883
chr10	28240416	28240925
chr10	28277890	28279290
chr10	28341949	28342340
chr10	28376362	28376696
chr10	28382461	28382797
chr10	28383401	28384346
chr10	28384890	28385353
chr10	28387716	28388067
chr10	28422945	28423483
chr10	28438357	28438910
chr10	28442390	28442738
chr10	28449730	28450343
chr10	28500466	28501191
chr10	28507036	28507411
chr10	28525849	28526200
chr10	28531671	28532235
chr10	28544932	28545287
chr10	28546075	28546472
chr10	28546989	28547775
chr10	28565512	28566016
chr10	28567376	28567747
chr10	28573665	28573998
chr10	28577065	28577762
chr10	28583534	28583939
chr10	28592414	28592855
chr10	28622293	28622683
chr10	28630903	28631368
chr10	28643020	28643436
chr10	28646254	28646900
chr10	28655441	28656259
chr10	28662699	28663280
chr10	28663783	28664072
chr10	28665241	28665602
chr10	28696353	28697150
chr10	28711244	28711593
chr10	28715798	28716550
chr10	28728093	28728462
chr10	28761042	28762242
chr10	28771450	28771844
chr10	28799668	28800077
chr10	28821602	28822254
chr10	28824033	28824174
chr10	28825216	28825568
chr10	28843779	28844557
chr10	28876873	28877245
chr10	28878829	28879145
chr10	28880024	28881203
chr10	28887854	28888930
chr10	28891895	28892301
chr10	28893214	28893576
chr10	28906663	28907296
chr10	28914188	28914377
chr10	28915798	28916185
chr10	28916589	28917460
chr10	28926717	28927520
chr10	28956196	28956621
chr10	28957383	28957936
chr10	28997321	28997792
chr10	29005431	29005891
chr10	29010288	29010696
chr10	29012997	29013736
chr10	29019038	29019442
chr10	29032608	29033176
chr10	29033751	29034299
chr10	29034334	29034797
chr10	29036337	29037356
chr10	29039139	29039742
chr10	29042645	29043230
chr10	29046189	29046352
chr10	29046866	29047303
chr10	29050549	29050882
chr10	29059253	29059631
chr10	29072039	29072985
chr10	29073655	29074411
chr10	29111995	29112573
chr10	29122529	29123112
chr10	29135426	29135806
chr10	29137087	29137438
chr10	29141658	29142409
chr10	29147551	29147798
chr10	29151534	29151995
chr10	29204664	29205138
chr10	29205998	29206486
chr10	29208747	29209782
chr10	29242566	29243298
chr10	29250001	29250331
chr10	29268646	29269025
chr10	29270278	29270574
chr10	29288854	29289494
chr10	29299610	29300368
chr10	29301604	29302315
chr10	29313447	29313866
chr10	29339932	29340281
chr10	29340742	29341200
chr10	29351358	29351950
chr10	29357160	29357589
chr10	29359217	29359861
chr10	29360779	29361197
chr10	29368263	29368881
chr10	29370623	29370972
chr10	29386546	29386897
chr10	29393256	29393613
chr10	29393548	29394516
chr10	29431393	29431729
chr10	29434584	29434944
chr10	29448373	29448865
chr10	29453963	29454345
chr10	29455926	29456309
chr10	29461690	29462060
chr10	29486611	29486941
chr10	29528316	29528761
chr10	29531135	29531498
chr10	29532723	29533250
chr10	29568432	29569357
chr10	29571732	29572241
chr10	29572698	29573118
chr10	29579278	29579722
chr10	29582109	29582503
chr10	29583513	29583959
chr10	29595021	29595433
chr10	29606254	29606699
chr10	29632705	29633141
chr10	29674775	29675208
chr10	29682692	29683142
chr10	29698562	29699207
chr10	29707002	29708163
chr10	29708825	29709226
chr10	29710311	29710662
chr10	29740536	29741071
chr10	29742019	29742203
chr10	29777022	29777608
chr10	29799164	29800069
chr10	29801500	29801979
chr10	29811593	29812021
chr10	29864436	29865026
chr10	29866594	29867184
chr10	29870391	29871186
chr10	29889488	29890291
chr10	29920632	29920798
chr10	29927977	29928317
chr10	29947361	29947604
chr10	29949701	29951358
chr10	29964576	29964956
chr10	29965513	29966854
chr10	29971726	29971836
chr10	29973298	29973476
chr10	29975534	29975884
chr10	29986266	29986846
chr10	29987879	29988332
chr10	30017048	30017495
chr10	30020763	30021166
chr10	30032077	30032948
chr10	30038171	30038569
chr10	30057166	30058210
chr10	30063515	30064216
chr10	30075380	30075754
chr10	30086332	30086790
chr10	30091873	30092018
chr10	30133237	30133959
chr10	30140414	30140746
chr10	30145689	30146844
chr10	30147174	30147542
chr10	30170368	30171968
chr10	30178259	30178730
chr10	30237962	30238333
chr10	30293308	30293661
chr10	30326886	30327556
chr10	30329805	30330476
chr10	30336492	30336880
chr10	30342321	30343025
chr10	30346254	30346622
chr10	30347191	30347549
chr10	30370475	30371364
chr10	30387528	30387835
chr10	30388481	30389160
chr10	30395343	30395987
chr10	30399060	30399510
chr10	30400339	30400913
chr10	30403159	30403663
chr10	30463314	30463736
chr10	30506945	30507664
chr10	30521191	30521576
chr10	30548902	30549353
chr10	30623950	30624582
chr10	30661518	30661901
chr10	30678215	30678946
chr10	30721584	30722171
chr10	30746315	30746732
chr10	30747385	30747779
chr10	30752299	30752701
chr10	30760449	30761127
chr10	30761783	30762615
chr10	30765132	30765609
chr10	30766553	30766906
chr10	30788159	30788596
chr10	30834740	30835678
chr10	30863586	30864044
chr10	30864917	30865319
chr10	30870710	30871022
chr10	30881793	30882557
chr10	30884623	30885346
chr10	30886719	30887114
chr10	30888065	30888254
chr10	30913126	30913911
chr10	30920280	30920689
chr10	30925265	30925603
chr10	30927287	30927710
chr10	30935245	30935888
chr10	30950870	30951787
chr10	30974191	30974609
chr10	31030305	31030779
chr10	31112247	31112677
chr10	31133368	31133731
chr10	31141107	31142090
chr10	31147985	31148761
chr10	31150345	31150590
chr10	31150570	31151655
chr10	31156802	31157169
chr10	31161378	31161710
chr10	31170162	31170549
chr10	31186827	31187266
chr10	31187578	31187874
chr10	31266575	31266972
chr10	31309219	31310402
chr10	31325546	31325977
chr10	31358279	31358662
chr10	31361135	31361344
chr10	31363140	31363515
chr10	31403253	31403815
chr10	31416773	31417172
chr10	31425002	31425622
chr10	31428327	31428670
chr10	31450475	31450905
chr10	31451865	31452244
chr10	31453244	31453835
chr10	31458194	31458615
chr10	31486207	31486703
chr10	31499162	31499606
chr10	31617949	31618433
chr10	31646945	31647323
chr10	31649299	31650183
chr10	31681514	31681824
chr10	31733674	31734013
chr10	31748042	31748425
chr10	31754992	31756008
chr10	31756252	31756659
chr10	31786733	31787683
chr10	31865581	31865899
chr10	31872749	31873137
chr10	31879297	31879648
chr10	31928686	31929205
chr10	31931345	31932691
chr10	31932473	31933374
chr10	31950195	31950768
chr10	31951532	31951909
chr10	31979124	31979518
chr10	31998613	31999114
chr10	32023051	32023477
chr10	32029189	32029533
chr10	32030441	32030883
chr10	32036154	32037041
chr10	32050262	32050682
chr10	32078995	32079394
chr10	32086149	32086560
chr10	32086743	32087387
chr10	32089320	32089788
chr10	32103166	32103513
chr10	32137362	32137819
chr10	32191465	32191891
chr10	32193274	32194346
chr10	32226594	32227226
chr10	32242141	32242498
chr10	32244835	32245426
chr10	32250187	32250552
chr10	32255844	32256145
chr10	32258304	32258744
chr10	32259234	32259600
chr10	32269773	32270060
chr10	32270418	32270818
chr10	32272330	32272707
chr10	32272993	32273734
chr10	32275515	32276015
chr10	32290656	32290967
chr10	32304115	32304531
chr10	32306397	32306807
chr10	32331405	32331907
chr10	32332906	32333312
chr10	32369397	32369867
chr10	32370560	32370982
chr10	32379174	32379579
chr10	32385964	32386364
chr10	32390105	32390714
chr10	32467436	32469074
chr10	32470005	32470841
chr10	32474125	32474426
chr10	32518650	32519207
chr10	32547152	32547529
chr10	32576806	32577483
chr10	32580347	32580676
chr10	32582682	32583129
chr10	32585434	32586644
chr10	32648846	32649173
chr10	32661101	32661814
chr10	32663950	32665131
chr10	32667254	32667721
chr10	32669288	32669993
chr10	32671946	32672613
chr10	32677511	32677882
chr10	32678616	32678976
chr10	32680205	32680450
chr10	32681676	32682009
chr10	32683516	32683892
chr10	32684279	32685156
chr10	32685540	32685888
chr10	32689255	32689560
chr10	32697150	32697649
chr10	32700135	32700796
chr10	32709214	32709606
chr10	32712200	32712770
chr10	32712945	32713605
chr10	32715390	32715783
chr10	32716348	32717174
chr10	32718151	32718997
chr10	32718872	32719822
chr10	32730727	32731026
chr10	32768898	32769266
chr10	32775108	32775513
chr10	32776477	32776943
chr10	32910147	32910573
chr10	33240214	33240653
chr10	33252058	33252685
chr10	33267870	33268038
chr10	33272826	33274014
chr10	33283025	33283447
chr10	33289067	33289473
chr10	33290633	33291100
chr10	33293452	33293857
chr10	33301283	33301744
chr10	33302170	33302795
chr10	33309153	33309594
chr10	33312185	33312580
chr10	33314412	33314786
chr10	33334581	33335177
chr10	33337464	33337880
chr10	33339453	33339825
chr10	33350721	33351060
chr10	33360876	33361616
chr10	33417499	33418350
chr10	33445136	33445638
chr10	33450989	33451288
chr10	33455001	33455384
chr10	33489060	33489468
chr10	33492450	33493258
chr10	33493295	33493704
chr10	33495147	33495532
chr10	33524690	33525103
chr10	33525698	33527096
chr10	33531577	33532034
chr10	33561978	33562466
chr10	33563684	33564064
chr10	33572644	33573048
chr10	33582074	33582451
chr10	33601224	33601743
chr10	33602664	33603113
chr10	33606006	33606732
chr10	33608018	33608504
chr10	33615027	33615722
chr10	33616560	33617068
chr10	33622289	33622655
chr10	33625293	33625846
chr10	33635015	33635315
chr10	33639998	33640557
chr10	33642546	33642929
chr10	33644518	33644991
chr10	33653743	33654073
chr10	33663249	33663465
chr10	33664821	33665237
chr10	33665700	33666157
chr10	33707091	33707444
chr10	33708949	33709284
chr10	33711154	33711588
chr10	33714084	33714548
chr10	33718825	33719220
chr10	33721006	33721347
chr10	33722401	33723251
chr10	33731268	33731601
chr10	33748360	33748792
chr10	33751192	33751613
chr10	33764241	33765200
chr10	33770299	33770803
chr10	33783576	33784172
chr10	33807485	33808319
chr10	33812275	33813957
chr10	33814271	33814795
chr10	33821260	33821657
chr10	33849867	33850213
chr10	33885512	33886098
chr10	33886652	33887013
chr10	33894952	33895794
chr10	33960806	33961300
chr10	33984101	33984694
chr10	33986551	33986886
chr10	33989307	33989829
chr10	33990944	33991277
chr10	33992902	33993319
chr10	33995948	33996616
chr10	34003431	34003946
chr10	34032394	34033299
chr10	34038279	34038707
chr10	34060223	34060679
chr10	34062584	34063040
chr10	34063787	34064573
chr10	34070811	34072249
chr10	34077563	34077884
chr10	34079355	34079662
chr10	34087517	34087911
chr10	34100447	34100864
chr10	34102450	34102899
chr10	34116296	34116922
chr10	34119604	34120038
chr10	34132698	34133112
chr10	34147732	34148176
chr10	34149109	34149481
chr10	34162505	34162885
chr10	34166579	34167119
chr10	34218250	34219124
chr10	34246781	34247395
chr10	34256767	34257137
chr10	34260323	34260656
chr10	34264194	34264555
chr10	34267656	34268209
chr10	34268965	34269551
chr10	34292960	34293279
chr10	34295611	34296316
chr10	34353963	34354548
chr10	34375454	34376116
chr10	34383596	34384273
chr10	34406151	34406946
chr10	34431127	34432047
chr10	34434124	34434625
chr10	34442491	34442858
chr10	34501276	34501668
chr10	34506303	34506992
chr10	34507728	34508144
chr10	34510901	34511338
chr10	34512684	34513492
chr10	34513689	34514073
chr10	34515442	34515839
chr10	34517642	34518102
chr10	34521420	34521823
chr10	34523243	34523469
chr10	34528173	34528615
chr10	34529061	34529936
chr10	34531754	34532158
chr10	34535806	34536201
chr10	34545949	34546339
chr10	34568130	34568499
chr10	34569569	34570057
chr10	34617502	34618766
chr10	34624234	34624679
chr10	34626456	34627113
chr10	34643222	34643918
chr10	34645713	34646115
chr10	34648105	34648459
chr10	34652481	34652838
chr10	34653271	34653680
chr10	34654485	34655394
chr10	34656332	34656462
chr10	34670446	34670833
chr10	34703629	34704223
chr10	34710470	34710837
chr10	34718313	34718864
chr10	34736059	34736317
chr10	34767677	34768115
chr10	34791285	34791616
chr10	34802226	34802602
chr10	34808822	34809350
chr10	34821024	34821371
chr10	34855145	34855466
chr10	34857108	34857519
chr10	34869877	34871112
chr10	34876865	34877754
chr10	34905043	34905416
chr10	34906180	34906572
chr10	34908905	34909650
chr10	34910137	34910897
chr10	34911355	34912076
chr10	34925812	34926145
chr10	34927896	34928346
chr10	34936892	34937338
chr10	34952349	34952851
chr10	34954195	34954594
chr10	34965131	34966002
chr10	34967240	34967632
chr10	34968964	34969381
chr10	34973231	34973583
chr10	34980895	34981276
chr10	34984185	34984769
chr10	34987174	34987909
chr10	34995353	34995748
chr10	35013255	35013586
chr10	35026874	35027500
chr10	35050157	35050693
chr10	35051361	35051746
chr10	35053507	35053918
chr10	35057690	35058420
chr10	35061685	35062078
chr10	35068750	35069126
chr10	35072854	35073172
chr10	35076718	35077331
chr10	35095518	35096097
chr10	35097400	35098590
chr10	35106038	35106372
chr10	35109734	35110439
chr10	35111100	35111523
chr10	35112644	35113277
chr10	35115889	35116669
chr10	35119682	35120038
chr10	35138046	35138895
chr10	35145382	35145933
chr10	35157980	35158674
chr10	35167150	35167484
chr10	35182965	35183381
chr10	35190397	35190753
chr10	35192630	35192970
chr10	35194412	35195045
chr10	35195762	35196109
chr10	35214655	35215169
chr10	35234900	35235326
chr10	35237296	35237628
chr10	35247752	35248238
chr10	35251118	35251636
chr10	35270681	35271125
chr10	35280663	35281049
chr10	35284143	35284552
chr10	35296500	35296971
chr10	35323780	35324106
chr10	35336921	35337356
chr10	35345366	35345779
chr10	35349898	35350970
chr10	35369734	35370139
chr10	35385403	35385713
chr10	35419472	35419944
chr10	35433010	35433512
chr10	35441026	35442076
chr10	35446033	35446449
chr10	35449411	35449781
chr10	35455291	35455711
chr10	35458783	35459126
chr10	35460716	35461048
chr10	35462376	35462883
chr10	35501053	35501434
chr10	35509464	35510071
chr10	35520258	35520838
chr10	35524170	35524806
chr10	35533061	35533570
chr10	35549390	35549793
chr10	35550679	35551108
chr10	35561877	35562326
chr10	35565868	35566369
chr10	35594044	35595001
chr10	35597087	35598018
chr10	35602284	35603151
chr10	35603544	35604026
chr10	35605426	35605969
chr10	35633654	35633997
chr10	35656055	35657390
chr10	35658450	35659129
chr10	35669666	35670406
chr10	35676067	35676534
chr10	35677254	35677934
chr10	35685223	35685634
chr10	35696434	35696810
chr10	35697982	35698434
chr10	35701023	35701783
chr10	35707219	35707863
chr10	35709586	35710184
chr10	35716014	35716615
chr10	35722111	35722901
chr10	35725375	35725838
chr10	35726689	35727284
chr10	35728032	35728272
chr10	35740742	35741253
chr10	35743901	35744583
chr10	35747089	35747941
chr10	35750189	35750786
chr10	35774236	35775062
chr10	35776736	35777462
chr10	35777983	35778235
chr10	35791466	35792003
chr10	35792732	35793353
chr10	35794318	35794787
chr10	35798994	35799563
chr10	35809271	35809576
chr10	35821780	35822094
chr10	35822720	35823098
chr10	35877458	35877881
chr10	35892754	35894180
chr10	35914638	35915760
chr10	35920074	35920751
chr10	35922955	35923315
chr10	35933645	35933996
chr10	35934574	35935058
chr10	35959399	35959769
chr10	35960155	35960552
chr10	35961608	35962911
chr10	35963646	35964180
chr10	35967708	35968451
chr10	35973299	35973745
chr10	35980846	35981073
chr10	35990129	35990451
chr10	35994213	35994565
chr10	36018812	36019396
chr10	36107006	36107370
chr10	36112520	36112886
chr10	36120235	36120703
chr10	36124451	36124789
chr10	36149863	36150838
chr10	36151030	36151854
chr10	36156690	36157160
chr10	36201420	36202293
chr10	36203681	36204339
chr10	36212003	36212479
chr10	36213543	36214117
chr10	36218922	36219368
chr10	36228032	36228435
chr10	36269202	36270298
chr10	36355043	36355486
chr10	36368337	36368960
chr10	36500419	36500840
chr10	36501414	36501842
chr10	36511185	36511545
chr10	36513666	36514499
chr10	36516894	36517330
chr10	36537846	36538401
chr10	36540087	36540677
chr10	36541847	36542299
chr10	36549180	36549823
chr10	36555386	36555756
chr10	36582220	36582776
chr10	36585146	36585715
chr10	36696316	36696714
chr10	36751930	36752295
chr10	36775745	36776750
chr10	36779259	36779705
chr10	36818482	36819075
chr10	36833964	36834333
chr10	36836214	36836659
chr10	36840579	36841191
chr10	36842869	36843257
chr10	36862794	36864133
chr10	36893680	36894054
chr10	36922565	36923743
chr10	36957113	36957604
chr10	36957767	36958111
chr10	36962286	36962723
chr10	36962826	36963213
chr10	36963150	36963717
chr10	36964859	36965170
chr10	36966288	36966588
chr10	36967582	36968006
chr10	36976368	36976814
chr10	36998894	36999274
chr10	37000305	37000919
chr10	37005879	37006231
chr10	37050540	37050919
chr10	37053466	37053892
chr10	37055552	37055858
chr10	37088281	37088802
chr10	37090958	37091743
chr10	37093634	37094305
chr10	37095850	37096320
chr10	37131658	37132056
chr10	37137803	37138096
chr10	37139333	37139865
chr10	37167488	37168301
chr10	37173208	37173647
chr10	37174682	37175042
chr10	37190794	37191134
chr10	37195221	37195643
chr10	37202214	37202680
chr10	37207478	37207888
chr10	37209405	37209751
chr10	37271415	37272145
chr10	37272317	37272770
chr10	37598557	37598936
chr10	37816992	37818074
chr10	38184452	38185192
chr10	38185796	38186247
chr10	38187027	38187350
chr10	38379340	38379719
chr10	38422675	38423094
chr10	38424087	38424518
chr10	42267640	42268860
chr10	42289985	42290347
chr10	42368601	42369356
chr10	42505575	42506388
chr10	42597660	42598062
chr10	42676936	42677471
chr10	42742367	42742808
chr10	42859416	42860248
chr10	42936826	42937513
chr10	42952917	42953269
chr10	43071717	43072454
chr10	43108486	43109296
chr10	43152216	43152803
chr10	43153514	43154366
chr10	43154757	43155273
chr10	43169625	43170095
chr10	43208949	43209421
chr10	43211067	43211463
chr10	43214017	43214406
chr10	43217031	43217637
chr10	43218255	43218938
chr10	43219962	43220384
chr10	43235563	43235989
chr10	43236432	43236808
chr10	43270704	43271108
chr10	43271229	43271623
chr10	43277518	43277890
chr10	43389101	43389490
chr10	43413940	43414454
chr10	43422027	43422819
chr10	43437536	43438141
chr10	43444372	43445004
chr10	43462655	43464204
chr10	43464378	43465143
chr10	43487252	43487542
chr10	43489260	43489623
chr10	43490273	43490787
chr10	43495121	43495517
chr10	43505674	43506232
chr10	43658963	43659364
chr10	43661435	43662361
chr10	43683190	43683609
chr10	43683669	43684016
chr10	43720860	43721358
chr10	43726136	43726549
chr10	43755096	43756337
chr10	43759581	43759965
chr10	43795622	43796043
chr10	43918106	43918570
chr10	43927747	43928181
chr10	43969703	43970214
chr10	43995301	43995825
chr10	44049266	44049668
chr10	44096413	44096856
chr10	44114224	44114634
chr10	44116486	44116855
chr10	44191542	44192517
chr10	44202424	44202773
chr10	44214966	44215383
chr10	44291968	44292370
chr10	44322565	44323715
chr10	44332379	44332720
chr10	44405062	44405511
chr10	44434622	44435135
[truncated: 115,572 more rows]

## Sheet: EWS502 H3K4me2 peaks
chr10	109362	109873
chr10	111969	112428
chr10	115235	115555
chr10	159962	160360
chr10	166087	166476
chr10	167135	168057
chr10	170024	171107
chr10	172159	172679
chr10	177231	177639
chr10	196753	197298
chr10	261731	262077
chr10	312671	313907
chr10	342029	342453
chr10	342689	342969
chr10	350398	350791
chr10	360097	360517
chr10	362067	362403
chr10	365455	365859
chr10	406093	406615
chr10	409645	410496
chr10	412817	413446
chr10	418464	418838
chr10	446941	447349
chr10	492522	492856
chr10	517048	517404
chr10	520370	521555
chr10	526752	527672
chr10	537368	538352
chr10	546892	547473
chr10	557878	558282
chr10	565732	565951
chr10	577922	578282
chr10	579033	579429
chr10	583588	584195
chr10	590340	590610
chr10	590737	591072
chr10	634551	634947
chr10	641309	642057
chr10	652257	653003
chr10	656868	657938
chr10	669502	670639
chr10	685626	686282
chr10	686666	686849
chr10	694202	694502
chr10	696839	697527
chr10	719343	719754
chr10	723463	724527
chr10	725873	726480
chr10	728890	729337
chr10	735787	736299
chr10	768894	769680
chr10	811294	811607
chr10	820267	820996
chr10	873413	873756
chr10	883743	884396
chr10	905065	905525
chr10	941606	942029
chr10	954133	954599
chr10	962153	962628
chr10	966450	966760
chr10	967940	968488
chr10	990915	991511
chr10	1004515	1004870
chr10	1006686	1007091
chr10	1010428	1010792
chr10	1023648	1023965
chr10	1080046	1080564
chr10	1086561	1086891
chr10	1087703	1088342
chr10	1093176	1093583
chr10	1099456	1099895
chr10	1146278	1146763
chr10	1157245	1157716
chr10	1207883	1208743
chr10	1289097	1289626
chr10	1319977	1321145
chr10	1325391	1325682
chr10	1348978	1349372
chr10	1356813	1357731
chr10	1433346	1433624
chr10	1499498	1499890
chr10	1516276	1516719
chr10	1540929	1541332
chr10	1557912	1558265
chr10	1634067	1634288
chr10	1699855	1700536
chr10	1700952	1701587
chr10	1701907	1702339
chr10	1703177	1703840
chr10	1720244	1720612
chr10	1738891	1739311
chr10	1740864	1741383
chr10	1742530	1743179
chr10	1747927	1748488
chr10	1758484	1759338
chr10	1759355	1759728
chr10	1762419	1762800
chr10	1771797	1772185
chr10	1787518	1787901
chr10	1826525	1826939
chr10	1854430	1854915
chr10	1879753	1880253
chr10	1891114	1891490
chr10	1892599	1893148
chr10	1922707	1923111
chr10	1928325	1928700
chr10	1955851	1956480
chr10	1959111	1959860
chr10	1960577	1960978
chr10	1961544	1962279
chr10	1975699	1976289
chr10	2000962	2001156
chr10	2044496	2044917
chr10	2048901	2049286
chr10	2051624	2052032
chr10	2052687	2053057
chr10	2074589	2074989
chr10	2077916	2078465
chr10	2091320	2091975
chr10	2107132	2107512
chr10	2172954	2173745
chr10	2234574	2234879
chr10	2244440	2244926
chr10	2246862	2247601
chr10	2253707	2254096
chr10	2257858	2258426
chr10	2311710	2312585
chr10	2314348	2314772
chr10	2318219	2318719
chr10	2331689	2332294
chr10	2395711	2396046
chr10	2399785	2400275
chr10	2470897	2471587
chr10	2477326	2477975
chr10	2519386	2519772
chr10	2520595	2521049
chr10	2535944	2536334
chr10	2538428	2539076
chr10	2558541	2559071
chr10	2643048	2643646
chr10	2653058	2653448
chr10	2696695	2697005
chr10	2703057	2703464
chr10	2714137	2714471
chr10	2764387	2764769
chr10	2777058	2777517
chr10	2798237	2798599
chr10	2830622	2830965
chr10	2867827	2869007
chr10	2879429	2879880
chr10	2883682	2884215
chr10	2888239	2888627
chr10	2894182	2894526
chr10	2905894	2906240
chr10	2914883	2915263
chr10	2917603	2918028
chr10	2923237	2923572
chr10	2938823	2939686
chr10	2941172	2941451
chr10	2957629	2958630
chr10	2968468	2969130
chr10	3006983	3007575
chr10	3009728	3010113
chr10	3018550	3018938
chr10	3040984	3041443
chr10	3047050	3047434
chr10	3076079	3076471
chr10	3078745	3079732
chr10	3092547	3093116
chr10	3101356	3101924
chr10	3126006	3126600
chr10	3159088	3159255
chr10	3173634	3174154
chr10	3205238	3205721
chr10	3225520	3225828
chr10	3229731	3230078
chr10	3235822	3236230
chr10	3241776	3242818
chr10	3271672	3272076
chr10	3272181	3272541
chr10	3273720	3274517
chr10	3302769	3303507
chr10	3309173	3309457
chr10	3319705	3320070
chr10	3345720	3346409
chr10	3356238	3356703
chr10	3360592	3361000
chr10	3367977	3368468
chr10	3371927	3372323
chr10	3382673	3383023
chr10	3421306	3421674
chr10	3456201	3456886
chr10	3504178	3504912
chr10	3514302	3514684
chr10	3586264	3586930
chr10	3700560	3700913
chr10	3703776	3704313
chr10	3777588	3778166
chr10	3782173	3782479
chr10	3798166	3798579
chr10	3818039	3818447
chr10	3835566	3835981
chr10	3836256	3836857
chr10	3839669	3840214
chr10	3841984	3842689
chr10	3843396	3843801
chr10	3861541	3861940
chr10	3868046	3868453
chr10	3967245	3967877
chr10	4114912	4115926
chr10	4376116	4376568
chr10	4639961	4640340
chr10	4682656	4683173
chr10	4685403	4685743
chr10	4687594	4687997
chr10	4694801	4695205
chr10	4721007	4721382
chr10	4723266	4724149
chr10	4728729	4729563
chr10	4735258	4735628
chr10	4736094	4736862
chr10	4738079	4738452
chr10	4799642	4800059
chr10	4812705	4813099
chr10	4816952	4817516
chr10	4822242	4822934
chr10	4840359	4840771
chr10	4841097	4841603
chr10	4847318	4847716
chr10	4852979	4853290
chr10	4858838	4859461
chr10	4860147	4860787
chr10	4870939	4871336
chr10	4881666	4882062
chr10	4883964	4884390
chr10	4919728	4920100
chr10	4926239	4926639
chr10	5067481	5067909
chr10	5068884	5069883
chr10	5073542	5073930
chr10	5076096	5077168
chr10	5103486	5103764
chr10	5108598	5109323
chr10	5111724	5112085
chr10	5126123	5127013
chr10	5324045	5324431
chr10	5325526	5325981
chr10	5329421	5329986
chr10	5331064	5331685
chr10	5339586	5340171
chr10	5349474	5349951
chr10	5396626	5397233
chr10	5416138	5416630
chr10	5428455	5428857
chr10	5444955	5445413
chr10	5474421	5474935
chr10	5478524	5478894
chr10	5481800	5482333
chr10	5538276	5538891
chr10	5586046	5586474
chr10	5591466	5591895
chr10	5605536	5605859
chr10	5607506	5608087
chr10	5615480	5615725
chr10	5617197	5617611
chr10	5626574	5627012
chr10	5686919	5687383
chr10	5692612	5693153
chr10	5704927	5705305
chr10	5710350	5711031
chr10	5725677	5726069
chr10	5748598	5749346
chr10	5760512	5760894
chr10	5766295	5766686
chr10	5769421	5769884
chr10	5770243	5770871
chr10	5771194	5771539
chr10	5774713	5775602
chr10	5858913	5859364
chr10	5890425	5890534
chr10	5893215	5893716
chr10	5895528	5896096
chr10	5958151	5958622
chr10	5959664	5960088
chr10	5970682	5971253
chr10	5972609	5973013
chr10	6027637	6028165
chr10	6033036	6033387
chr10	6035766	6035939
chr10	6059435	6060057
chr10	6082042	6082402
chr10	6087601	6088246
chr10	6094906	6095214
chr10	6102768	6103303
chr10	6105136	6106418
chr10	6132688	6133056
chr10	6157098	6157262
chr10	6165334	6165756
chr10	6168148	6168515
chr10	6171205	6172245
chr10	6176043	6176300
chr10	6177559	6177886
chr10	6202384	6203224
chr10	6206689	6207033
chr10	6210789	6211168
chr10	6223414	6223786
chr10	6227789	6228684
chr10	6229918	6230299
chr10	6239300	6239407
chr10	6246156	6246805
chr10	6248438	6248833
chr10	6252539	6253012
chr10	6266951	6267275
chr10	6282613	6283025
chr10	6290428	6291498
chr10	6300749	6301449
chr10	6357037	6357657
chr10	6361401	6361695
chr10	6373096	6373450
chr10	6378513	6379528
chr10	6381822	6382942
chr10	6383420	6383815
chr10	6384682	6385181
chr10	6389512	6389929
chr10	6395320	6395657
chr10	6423687	6424262
chr10	6425782	6426165
chr10	6429677	6430019
chr10	6464083	6464524
chr10	6481219	6481565
chr10	6483400	6484094
chr10	6527786	6528185
chr10	6820257	6820650
chr10	7415438	7416212
chr10	7492959	7493488
chr10	7594338	7594853
chr10	7607643	7608615
chr10	7613110	7613872
chr10	7674108	7674856
chr10	7769184	7769560
chr10	7829364	7829861
chr10	7832038	7833231
chr10	7870447	7871286
chr10	7872553	7872932
chr10	7875245	7875592
chr10	7900541	7901641
chr10	7955381	7955807
chr10	7958413	7958803
chr10	8025283	8025647
chr10	8108727	8109331
chr10	8116428	8116936
chr10	8132309	8132724
chr10	8135502	8136250
chr10	8138748	8139169
chr10	8142240	8142587
chr10	8219639	8220292
chr10	8240124	8241008
chr10	8262538	8263399
chr10	8297644	8298657
chr10	8310936	8311785
chr10	8326871	8327240
chr10	8349883	8350425
chr10	8357865	8358254
chr10	8378079	8378456
chr10	8380765	8381295
chr10	8413805	8414956
chr10	8459670	8460281
chr10	8535647	8536082
chr10	8564821	8564921
chr10	8584625	8585310
chr10	8586252	8586694
chr10	8591202	8591702
chr10	8592922	8593278
chr10	8598608	8598980
chr10	8616598	8617542
chr10	8733187	8733586
chr10	8734318	8734932
chr10	9291036	9291445
chr10	10376745	10378037
chr10	11352397	11352754
chr10	11410721	11411177
chr10	11530643	11531402
chr10	11592834	11593165
chr10	11594055	11594782
chr10	11610741	11610990
chr10	11629135	11629477
chr10	11639567	11639954
chr10	11675593	11676032
chr10	11682148	11682615
chr10	11692532	11693225
chr10	11693802	11694203
chr10	11707096	11707637
chr10	11728189	11728535
chr10	11736592	11736996
chr10	11745904	11746384
chr10	11755670	11755994
chr10	11764840	11765284
chr10	11770688	11771631
chr10	11819578	11820190
chr10	11823802	11824282
chr10	11845668	11846065
chr10	11855592	11855906
chr10	11881641	11882136
chr10	11896083	11896467
chr10	11902100	11902475
chr10	11904966	11905364
chr10	11912709	11913170
chr10	11956471	11956874
chr10	12032544	12033557
chr10	12122074	12122189
chr10	12124903	12125273
chr10	12128377	12129513
chr10	12135501	12135941
chr10	12144955	12145442
chr10	12151235	12151482
chr10	12211166	12211600
chr10	12272159	12272997
chr10	12273711	12274092
chr10	12278100	12278755
chr10	12295059	12295707
chr10	12296206	12296692
chr10	12301533	12302319
chr10	12346275	12346809
chr10	12352523	12352830
chr10	12405044	12405662
chr10	12407840	12408184
chr10	12415561	12415880
chr10	12432387	12432678
chr10	12478597	12479035
chr10	12482712	12483086
chr10	12496878	12497393
chr10	12565950	12566231
chr10	12592532	12592855
chr10	12628998	12629654
chr10	12648834	12649176
chr10	12789387	12789778
chr10	12865216	12865512
chr10	12907440	12908018
chr10	12916751	12917137
chr10	12927045	12927395
chr10	13001579	13002000
chr10	13083870	13084200
chr10	13180942	13181592
chr10	13183932	13185406
chr10	13244421	13244830
chr10	13354078	13354507
chr10	13380464	13382829
chr10	13383956	13384551
chr10	13420493	13420762
chr10	13422046	13422549
chr10	13428369	13428748
chr10	13430998	13431321
chr10	13464696	13465271
chr10	13472840	13473700
chr10	13521151	13522885
chr10	13611162	13611834
chr10	13639027	13639580
chr10	13669279	13670413
chr10	13742050	13742442
chr10	13754560	13754984
chr10	13766136	13767004
chr10	13782874	13783837
chr10	13789046	13790099
chr10	13799966	13800250
chr10	13832352	13832757
chr10	13839612	13840034
chr10	13855597	13856526
chr10	13869107	13869701
chr10	13908571	13909968
chr10	13972624	13974021
chr10	14093195	14093712
chr10	14123229	14123732
chr10	14156326	14156761
chr10	14235560	14236380
chr10	14255618	14256225
chr10	14276061	14276480
chr10	14409421	14409918
chr10	14457127	14457751
chr10	14486906	14487251
chr10	14579341	14580032
chr10	14580701	14581766
chr10	14644573	14645029
chr10	14685171	14685924
chr10	14686903	14687233
chr10	14696745	14697172
chr10	14698255	14699181
chr10	14707295	14707703
chr10	14730113	14730470
chr10	14735196	14735660
chr10	14834037	14835048
chr10	14842059	14842471
chr10	14842890	14843369
chr10	14919509	14920154
chr10	14940713	14941020
chr10	14959702	14960839
chr10	14961233	14961980
chr10	14975064	14975439
chr10	14975833	14976426
chr10	15035234	15035882
chr10	15041607	15042329
chr10	15165996	15166384
chr10	15166820	15167121
chr10	15170140	15170888
chr10	15178287	15179012
chr10	15223041	15223628
chr10	15250978	15251362
chr10	15253013	15253745
chr10	15264610	15264972
chr10	15277773	15278346
chr10	15367032	15367363
chr10	15371867	15372219
chr10	15375861	15376170
chr10	15376250	15376654
chr10	15395705	15396308
chr10	15404166	15404903
chr10	15407579	15407993
chr10	15427078	15427391
chr10	15429293	15429812
chr10	15430450	15430997
chr10	15431072	15431397
chr10	15449380	15449756
chr10	15451551	15451964
chr10	15453491	15453817
chr10	15457044	15457605
chr10	15468131	15468443
chr10	15516615	15517004
chr10	15521232	15521934
chr10	15597015	15597654
chr10	15653427	15653922
chr10	15717888	15718376
chr10	15785527	15785888
chr10	15896596	15897068
chr10	15939888	15940225
chr10	15941687	15942244
chr10	15959959	15960757
chr10	15961523	15962006
chr10	15984785	15985180
chr10	16020752	16022319
chr10	16518807	16519885
chr10	16522463	16522797
chr10	16603398	16603759
chr10	16648351	16648715
chr10	16648341	16648688
chr10	16665300	16666033
chr10	16768039	16768932
chr10	16824194	16824598
chr10	16898509	16899525
chr10	16914377	16915140
chr10	16944779	16945234
chr10	17024974	17025363
chr10	17027003	17028217
chr10	17031844	17032222
chr10	17068457	17068988
chr10	17071747	17072119
chr10	17074883	17075213
chr10	17077898	17078274
chr10	17088759	17089188
chr10	17104447	17104802
chr10	17107626	17108266
chr10	17111512	17112032
chr10	17114218	17114608
chr10	17115019	17115471
chr10	17126752	17127806
chr10	17145130	17145600
chr10	17148724	17149306
chr10	17158597	17159136
chr10	17174942	17175542
chr10	17197331	17197809
chr10	17208283	17209453
chr10	17220666	17221470
chr10	17230062	17230815
chr10	17272870	17273402
chr10	17282985	17283467
chr10	17300186	17301282
chr10	17301264	17301603
chr10	17310417	17310757
chr10	17339495	17339932
chr10	17430469	17431032
chr10	17510579	17511052
chr10	17535162	17536111
chr10	17536464	17537065
chr10	17590226	17591197
chr10	17609949	17610291
chr10	17644598	17645019
chr10	17662441	17662764
chr10	17669020	17669409
chr10	17689577	17690095
chr10	17699497	17700087
chr10	17726565	17726803
chr10	17728665	17729343
chr10	17755295	17755914
chr10	18262139	18262651
chr10	18331318	18331652
chr10	18397981	18398308
chr10	18463539	18463966
chr10	18465588	18465893
chr10	18468640	18469409
chr10	18475606	18475870
chr10	18477621	18478113
chr10	18488022	18488390
chr10	18509004	18509382
chr10	18524478	18524862
chr10	18525748	18526488
chr10	18543552	18544069
chr10	18553583	18554157
chr10	18557766	18558152
chr10	18633427	18633859
chr10	18669308	18669707
chr10	18679312	18679670
chr10	18745190	18746086
chr10	18955912	18956731
chr10	18976521	18976879
chr10	18980593	18980967
chr10	18987510	18987895
chr10	19017726	19018601
chr10	19240347	19240685
chr10	19246121	19246316
chr10	19249232	19249688
chr10	19308663	19309432
chr10	19369752	19371074
chr10	19425636	19426077
chr10	19441072	19441445
chr10	19488201	19488863
chr10	19509066	19509476
chr10	19538023	19538408
chr10	19607803	19608184
chr10	19751654	19752375
chr10	19809176	19809934
chr10	19827367	19827781
chr10	19905052	19906276
chr10	19906270	19906633
chr10	19958341	19958999
chr10	20015012	20015395
chr10	20048249	20048591
chr10	20146274	20147500
chr10	20148931	20149250
chr10	20162158	20162543
chr10	20163752	20165040
chr10	20168101	20168500
chr10	20246765	20247247
chr10	20247566	20248111
chr10	20250856	20251225
chr10	20259975	20260467
chr10	20263926	20264743
chr10	20282115	20282503
chr10	20293435	20293823
chr10	20295606	20296077
chr10	20491655	20491839
chr10	20501112	20501540
chr10	20557981	20558500
chr10	20562498	20563028
chr10	20636943	20637565
chr10	20698556	20699441
chr10	20735544	20735937
chr10	20738622	20739108
chr10	20760898	20761733
chr10	20763918	20764570
chr10	20771856	20772226
chr10	20780495	20781171
chr10	20926755	20927197
chr10	20951998	20952809
chr10	21074886	21075636
chr10	21121252	21122635
chr10	21176394	21176809
chr10	21186747	21187618
chr10	21207750	21208161
chr10	21216480	21216818
chr10	21218895	21219333
chr10	21319674	21320071
chr10	21323805	21324518
chr10	21360195	21360930
chr10	21372906	21374125
chr10	21398770	21399295
chr10	21407877	21408439
chr10	21428123	21428568
chr10	21502296	21502709
chr10	21523392	21524088
chr10	21541435	21541803
chr10	21570038	21570728
chr10	21607578	21608139
chr10	21621742	21622179
chr10	21643480	21643853
chr10	21645094	21645454
chr10	21665697	21666053
chr10	21679330	21679832
chr10	21693280	21693812
chr10	21698741	21699547
chr10	21702039	21702473
chr10	21709127	21709463
chr10	21710537	21710729
chr10	21712764	21713329
chr10	21728939	21729167
chr10	21731109	21731834
chr10	21735837	21736273
chr10	21752798	21752999
chr10	21756629	21756977
chr10	21825690	21826332
chr10	21844934	21845825
chr10	21854132	21854554
chr10	21862364	21862841
chr10	21863999	21864654
chr10	21954931	21955658
chr10	21979080	21979436
chr10	22043921	22044613
chr10	22052789	22053772
chr10	22053994	22054366
chr10	22056307	22057253
chr10	22060955	22061473
chr10	22062563	22063110
chr10	22136096	22136537
chr10	22255502	22257850
chr10	22258221	22258611
chr10	22304299	22304642
chr10	22304966	22305742
chr10	22310496	22311165
chr10	22318346	22318781
chr10	22332730	22332939
chr10	22351420	22351974
chr10	22371381	22372020
chr10	22532555	22532942
chr10	22558229	22558514
chr10	22580413	22581355
chr10	22592239	22592740
chr10	22645292	22646325
chr10	22646628	22646975
chr10	22649168	22649570
chr10	22650138	22650893
chr10	22650969	22651980
chr10	22654096	22654529
chr10	22665260	22665465
chr10	22667172	22667602
chr10	22669930	22670815
chr10	22673914	22674355
chr10	22701181	22701813
chr10	22756842	22757425
chr10	22764305	22765075
chr10	22765892	22766247
chr10	22804558	22805164
chr10	22808421	22808732
chr10	22834682	22835033
chr10	22893891	22894441
chr10	22929159	22929611
chr10	22949150	22949545
chr10	22952477	22952980
chr10	22978272	22978824
chr10	22984706	22985111
chr10	23003095	23003871
chr10	23041925	23042353
chr10	23094162	23095093
chr10	23095841	23096372
chr10	23109406	23109992
chr10	23134189	23134823
chr10	23139787	23140384
chr10	23178371	23178837
chr10	23240934	23241629
chr10	23256378	23257422
chr10	23382208	23382563
chr10	23382813	23383149
chr10	23384844	23385218
chr10	23392433	23392758
chr10	23394648	23395014
chr10	23397027	23397321
chr10	23408730	23409076
chr10	23410002	23410391
chr10	23424895	23425282
chr10	23428303	23429036
chr10	23479281	23479999
chr10	23486228	23486614
chr10	23502834	23503009
chr10	23520045	23520454
chr10	23521321	23521714
chr10	23521981	23522200
chr10	23524118	23524735
chr10	23610232	23610645
chr10	23620410	23620884
chr10	23621940	23622646
chr10	23623013	23623146
chr10	23655679	23656051
chr10	23673184	23673837
chr10	23676560	23677157
chr10	23698317	23698813
chr10	23705441	23705812
chr10	23767511	23767902
chr10	23769168	23769713
chr10	23775729	23776168
chr10	23778094	23778730
chr10	23829390	23829759
chr10	23860372	23860774
chr10	23863184	23863692
chr10	23864622	23864971
chr10	23870013	23870547
chr10	23885371	23886095
chr10	23886313	23887035
chr10	23959825	23960251
chr10	23960452	23961269
chr10	23972365	23972795
chr10	23986321	23986703
chr10	24016667	24017067
chr10	24023948	24024482
chr10	24031957	24032295
chr10	24080764	24081176
chr10	24083264	24083836
chr10	24149384	24149852
chr10	24156384	24156905
chr10	24256942	24257346
chr10	24260758	24261279
chr10	24262139	24262496
chr10	24284335	24284689
chr10	24316907	24317369
chr10	24337264	24338002
chr10	24426580	24427218
chr10	24443192	24443962
chr10	24444913	24445267
chr10	24446737	24447607
chr10	24448332	24448967
chr10	24457389	24457723
chr10	24480433	24480840
chr10	24495257	24495624
chr10	24496289	24496659
chr10	24525504	24525917
chr10	24526652	24527064
chr10	24538772	24539132
chr10	24542171	24542509
chr10	24543694	24544103
chr10	24566682	24567504
chr10	24569075	24569492
chr10	24584332	24584694
chr10	24615885	24616503
chr10	24648325	24648845
chr10	24660415	24661141
chr10	24673959	24674394
chr10	24681657	24682301
chr10	24718433	24719106
chr10	24719958	24720388
chr10	24744170	24745288
chr10	24756803	24757301
chr10	24777791	24779636
chr10	24783393	24783902
chr10	24791244	24791812
chr10	24792487	24793631
chr10	24812704	24813062
chr10	24834922	24835350
chr10	24847766	24848148
chr10	24885921	24886296
chr10	24901325	24901766
chr10	25010644	25011066
chr10	25035409	25035772
chr10	25036945	25037313
chr10	25043555	25043869
chr10	25045081	25045755
chr10	25050212	25051130
chr10	25052885	25053623
chr10	25090770	25091145
chr10	25177625	25177969
chr10	25180702	25181059
chr10	25187491	25188289
chr10	25194440	25194884
chr10	25198620	25199034
chr10	25202337	25202727
chr10	25206384	25207539
chr10	25211214	25211580
chr10	25230706	25231138
chr10	25250077	25250732
chr10	25258218	25259322
chr10	25281714	25282450
chr10	25345509	25345975
chr10	25349501	25349917
chr10	25352695	25353333
chr10	25399877	25401185
chr10	25409878	25410510
chr10	25411642	25412190
chr10	25430069	25430405
chr10	25442278	25442637
chr10	25503664	25503888
chr10	25835902	25836294
chr10	25859242	25859973
chr10	25876009	25876338
chr10	25886369	25886720
chr10	25958585	25958889
chr10	25971445	25971826
chr10	26011316	26011828
chr10	26029934	26030380
chr10	26067799	26068266
chr10	26072234	26072588
chr10	26075131	26075569
chr10	26095424	26096221
chr10	26105783	26106130
chr10	26157133	26157492
chr10	26178572	26179333
chr10	26263653	26264056
chr10	26554268	26554671
chr10	26562599	26562994
chr10	26564754	26565172
chr10	26597488	26598260
chr10	26598892	26599829
chr10	26664183	26664731
chr10	26675979	26676833
chr10	26766627	26768125
chr10	26800732	26800841
chr10	26814085	26814478
chr10	26869516	26870334
chr10	26879784	26880204
chr10	26884854	26885325
chr10	26895628	26896199
chr10	26994609	26995005
chr10	26999830	27000313
chr10	27003675	27003833
chr10	27005192	27006005
chr10	27007586	27008188
chr10	27027120	27027679
chr10	27030260	27030764
chr10	27032061	27033185
chr10	27054488	27055242
chr10	27055355	27056563
chr10	27084362	27085039
chr10	27128583	27129834
chr10	27132947	27133316
chr10	27135244	27135620
chr10	27161797	27162192
chr10	27168780	27169124
chr10	27180057	27180449
chr10	27180803	27181175
chr10	27187068	27187473
chr10	27189679	27190073
chr10	27198571	27198975
chr10	27210523	27211123
chr10	27429546	27430079
chr10	27480233	27480757
chr10	27483705	27484162
chr10	27527698	27528429
chr10	27567012	27567411
chr10	27570139	27570544
chr10	27576323	27576583
chr10	27588035	27588674
chr10	27674281	27674513
chr10	27676645	27677192
chr10	27682830	27683458
chr10	27698635	27699099
chr10	27700048	27700390
chr10	27705317	27705688
chr10	27775421	27775775
chr10	27776489	27776906
chr10	27785317	27785897
chr10	27811825	27812271
chr10	27832753	27833237
chr10	27843681	27844121
chr10	27852502	27853413
chr10	27853691	27854100
chr10	27857187	27857625
chr10	27936495	27937421
chr10	27937671	27938324
chr10	27941211	27941623
chr10	27949838	27950237
chr10	27971933	27972482
chr10	27989998	27990259
chr10	28008699	28009149
chr10	28043697	28044087
chr10	28050957	28051453
chr10	28051602	28052004
chr10	28057032	28057431
chr10	28072865	28072994
chr10	28139321	28140160
chr10	28186658	28187108
chr10	28213343	28213817
chr10	28228268	28228651
chr10	28240342	28240956
chr10	28327986	28328368
chr10	28341940	28342302
chr10	28376676	28377013
chr10	28383589	28384170
chr10	28448996	28449392
chr10	28475192	28475521
chr10	28489797	28490199
chr10	28500440	28501168
chr10	28506961	28507236
chr10	28531728	28532120
chr10	28543166	28543723
chr10	28546959	28547373
chr10	28565525	28566010
chr10	28573421	28574086
chr10	28577012	28577613
chr10	28583514	28583932
chr10	28632136	28632521
chr10	28655494	28656193
chr10	28662132	28662648
chr10	28663806	28664197
chr10	28665214	28665545
chr10	28695936	28696345
chr10	28710669	28712033
chr10	28715376	28715786
chr10	28722530	28723424
chr10	28728043	28728814
chr10	28761201	28761599
chr10	28771482	28771990
chr10	28788480	28788849
chr10	28799658	28800068
chr10	28821533	28821948
chr10	28860481	28861307
chr10	28862939	28863289
chr10	28864820	28865153
chr10	28874247	28874695
chr10	28878612	28878956
chr10	28880051	28880859
chr10	28892443	28892791
chr10	28915812	28916177
chr10	28916552	28917150
chr10	28947405	28948490
chr10	28956399	28956779
chr10	28957430	28957948
chr10	28993133	28993752
chr10	28997821	28998119
chr10	29005443	29005770
chr10	29013882	29014178
chr10	29039167	29039605
chr10	29047104	29047532
chr10	29049013	29049345
chr10	29050877	29051886
chr10	29059251	29059623
chr10	29073470	29074403
chr10	29122569	29123011
chr10	29136711	29137055
chr10	29141733	29142264
chr10	29146475	29147863
chr10	29151621	29152071
chr10	29162052	29162628
chr10	29182122	29182590
chr10	29204421	29205323
chr10	29209076	29209477
chr10	29268636	29269003
chr10	29299977	29300387
chr10	29313211	29313653
chr10	29322045	29323076
chr10	29336904	29337434
chr10	29340772	29341360
chr10	29351442	29351860
chr10	29357226	29357616
chr10	29359603	29359967
chr10	29360299	29360864
chr10	29368743	29369134
chr10	29370634	29371024
chr10	29386485	29387240
chr10	29393145	29393648
chr10	29431006	29431371
chr10	29434649	29434972
chr10	29448146	29448535
chr10	29453893	29454340
chr10	29455930	29456330
chr10	29461138	29461687
chr10	29486371	29486710
chr10	29487162	29487525
chr10	29505892	29506264
chr10	29524645	29525031
chr10	29531088	29531465
chr10	29555689	29556839
chr10	29557482	29558502
chr10	29567945	29568289
chr10	29571914	29572280
chr10	29579356	29579776
chr10	29583573	29583964
chr10	29585958	29586389
chr10	29595770	29596106
chr10	29624447	29625103
chr10	29633637	29634224
chr10	29674753	29675418
chr10	29699006	29699471
chr10	29707377	29707808
chr10	29709187	29709855
chr10	29710803	29711276
chr10	29715146	29715541
chr10	29738157	29738513
chr10	29800006	29800363
chr10	29812020	29812429
chr10	29864518	29864800
chr10	29870598	29871116
chr10	29888917	29889420
chr10	29919050	29919360
chr10	29946895	29947269
chr10	29950097	29950840
chr10	29961655	29962030
chr10	29964663	29965035
chr10	29975559	29975913
chr10	29987986	29988876
chr10	29999565	30000308
chr10	30017074	30017642
chr10	30017799	30018666
chr10	30020492	30021145
chr10	30032059	30032428
chr10	30041113	30041671
chr10	30064874	30065379
chr10	30075349	30075731
chr10	30133343	30133811
chr10	30141086	30141604
chr10	30142234	30143115
chr10	30147135	30147533
chr10	30178390	30178613
chr10	30207339	30207790
chr10	30237915	30238332
chr10	30293453	30293794
chr10	30325498	30325934
chr10	30327056	30327984
chr10	30329794	30330202
chr10	30336403	30336733
chr10	30342291	30342633
chr10	30346313	30346622
chr10	30347253	30347798
chr10	30369807	30370384
chr10	30388535	30388911
chr10	30395286	30395698
chr10	30399200	30399577
chr10	30403044	30403677
chr10	30418012	30418466
chr10	30443796	30444251
chr10	30463252	30463776
chr10	30544548	30544921
chr10	30548832	30549398
chr10	30550760	30551115
chr10	30615300	30616065
chr10	30653505	30653878
chr10	30678347	30678778
chr10	30721589	30721965
chr10	30747192	30748132
chr10	30752339	30752751
chr10	30763275	30763973
chr10	30788300	30788571
chr10	30834871	30835252
chr10	30863602	30863891
chr10	30869956	30870362
chr10	30870475	30871058
chr10	30871995	30872380
chr10	30882767	30883185
chr10	30912903	30913396
chr10	30925984	30926375
chr10	30950869	30951741
chr10	30974497	30975055
chr10	30999898	31000271
chr10	31030742	31031206
chr10	31063900	31064024
chr10	31113129	31113504
chr10	31133293	31133758
chr10	31145357	31145682
chr10	31148361	31148721
chr10	31156817	31157234
chr10	31161368	31161750
chr10	31161911	31162274
chr10	31161911	31162274
chr10	31169465	31169962
chr10	31186816	31187298
chr10	31250639	31251946
chr10	31358602	31359010
chr10	31360946	31361376
chr10	31403315	31403704
chr10	31425014	31425420
chr10	31450029	31450516
chr10	31452823	31453370
chr10	31458163	31458580
chr10	31571719	31572299
chr10	31646986	31647741
chr10	31649531	31650401
chr10	31733565	31733991
chr10	31879266	31879636
chr10	31932591	31933081
chr10	31951548	31951992
chr10	31978825	31979641
chr10	31989164	31989689
chr10	31998539	31999156
chr10	32022995	32023600
chr10	32023815	32024492
chr10	32036750	32037063
chr10	32078671	32079390
chr10	32085782	32087117
chr10	32089289	32089767
chr10	32102766	32103066
chr10	32103228	32103732
chr10	32191546	32191900
chr10	32193627	32194128
chr10	32210198	32210694
chr10	32210945	32211662
chr10	32241865	32242646
chr10	32258146	32258665
chr10	32269698	32270101
chr10	32272793	32273607
chr10	32276899	32277574
chr10	32290318	32290645
chr10	32346062	32346433
chr10	32369863	32370277
chr10	32380055	32380453
chr10	32384379	32384678
chr10	32385387	32385764
chr10	32389802	32390344
chr10	32432805	32433256
chr10	32467688	32468633
chr10	32470056	32470750
chr10	32473642	32474393
chr10	32506269	32506772
chr10	32547139	32547552
chr10	32580408	32580740
chr10	32582184	32582671
chr10	32585997	32586387
chr10	32640579	32641251
chr10	32648427	32649089
chr10	32657441	32657852
chr10	32660959	32661817
chr10	32664680	32665131
chr10	32667269	32668066
chr10	32671989	32672388
chr10	32675526	32675819
chr10	32683481	32683943
chr10	32685129	32685500
chr10	32689114	32689531
chr10	32691211	32691918
chr10	32694326	32694672
chr10	32696003	32696405
chr10	32697117	32697492
chr10	32698345	32698725
chr10	32699336	32699848
chr10	32701036	32701374
chr10	32707660	32708086
chr10	32713230	32713818
chr10	32715405	32715779
chr10	32717797	32718194
chr10	32719212	32719597
chr10	32730663	32731029
chr10	32746790	32747453
chr10	32775114	32775556
chr10	33267319	33267686
chr10	33285457	33285610
chr10	33287275	33287972
chr10	33290742	33291459
chr10	33292678	33293257
chr10	33293389	33293761
chr10	33301428	33301864
chr10	33309226	33310384
chr10	33334475	33334825
chr10	33337421	33337763
chr10	33379416	33379537
chr10	33403362	33403729
chr10	33417822	33418299
chr10	33440106	33441222
chr10	33451031	33451428
chr10	33489019	33489397
chr10	33491502	33492661
chr10	33493344	33493733
chr10	33495125	33495528
chr10	33522200	33522909
chr10	33523703	33525208
chr10	33525898	33527196
chr10	33530818	33531282
chr10	33531610	33532026
chr10	33540019	33540407
chr10	33540534	33540750
chr10	33558630	33559406
chr10	33572655	33573055
chr10	33582042	33582488
chr10	33602443	33602709
chr10	33615178	33615757
chr10	33643438	33643803
chr10	33654867	33655189
chr10	33659520	33659838
chr10	33661076	33661973
chr10	33663216	33663608
chr10	33707290	33707634
chr10	33710765	33711168
chr10	33720833	33721749
chr10	33731377	33731716
chr10	33748301	33748728
chr10	33751280	33751623
chr10	33770345	33770864
chr10	33807511	33807888
chr10	33812749	33813090
chr10	33838190	33838526
chr10	33849805	33850212
chr10	33862602	33863019
chr10	33885476	33886218
chr10	33894764	33895798
chr10	33960786	33961384
chr10	33984062	33984444
chr10	33984978	33985398
chr10	33986229	33986823
chr10	33989188	33989713
chr10	33990899	33991276
chr10	34003953	34004481
chr10	34038499	34038843
chr10	34062330	34062718
chr10	34063317	34064120
chr10	34065189	34065549
chr10	34071242	34072264
chr10	34072332	34072857
chr10	34078612	34079426
chr10	34087849	34088159
chr10	34100961	34101782
chr10	34119397	34120199
chr10	34136572	34136839
chr10	34147457	34148302
chr10	34218339	34218623
chr10	34245883	34246239
chr10	34260339	34260511
chr10	34282088	34283125
chr10	34292852	34293188
chr10	34375445	34376084
chr10	34383420	34384270
chr10	34431055	34431765
chr10	34433985	34434446
chr10	34442541	34442826
chr10	34450487	34451430
chr10	34501286	34501668
chr10	34506596	34507007
chr10	34507752	34508082
chr10	34510965	34511339
chr10	34514792	34515393
chr10	34517655	34518262
chr10	34519656	34520082
chr10	34523152	34523523
chr10	34528146	34528525
chr10	34529181	34530024
chr10	34531571	34532262
chr10	34536233	34536627
chr10	34537397	34537867
chr10	34545941	34546317
chr10	34568175	34568500
chr10	34569093	34570138
chr10	34583635	34584224
chr10	34594549	34595032
chr10	34624214	34624624
chr10	34627463	34627749
chr10	34648107	34648471
chr10	34648728	34649051
chr10	34664118	34664473
chr10	34693241	34693667
chr10	34702037	34702599
chr10	34703633	34704384
chr10	34736038	34736435
chr10	34791386	34791790
chr10	34854804	34855868
chr10	34870714	34871059
chr10	34903869	34904229
chr10	34904931	34905464
chr10	34906039	34906748
chr10	34910068	34910984
chr10	34912704	34913221
chr10	34935360	34935834
chr10	34936969	34937320
chr10	34941642	34942760
chr10	34952447	34952872
chr10	34954258	34954644
chr10	34957244	34957818
chr10	34964930	34965972
chr10	34972909	34973612
chr10	34980730	34981776
chr10	34987149	34987927
chr10	34995358	34995744
chr10	35018089	35018447
chr10	35050203	35050648
chr10	35057252	35058149
chr10	35061808	35062130
chr10	35068757	35069126
chr10	35076697	35077302
chr10	35095620	35096027
chr10	35097558	35098090
chr10	35109805	35110466
chr10	35119190	35119588
chr10	35138318	35138757
chr10	35142904	35143184
chr10	35145099	35145251
chr10	35159455	35159870
chr10	35166553	35167406
chr10	35179753	35180108
chr10	35182997	35183365
chr10	35190346	35191072
chr10	35192534	35192857
chr10	35195796	35196136
chr10	35214733	35214831
chr10	35234844	35235352
chr10	35237435	35237715
chr10	35247685	35248224
chr10	35251164	35251616
chr10	35280550	35281049
chr10	35282028	35283105
chr10	35296245	35297167
chr10	35323765	35324125
chr10	35345409	35345834
chr10	35350066	35350954
chr10	35369807	35370156
chr10	35419548	35419756
chr10	35432325	35432801
chr10	35432987	35433310
chr10	35455255	35455669
chr10	35516757	35517161
chr10	35524708	35525223
chr10	35547820	35548602
chr10	35549421	35549808
chr10	35561606	35562585
chr10	35569051	35569514
chr10	35597262	35598016
chr10	35655431	35655679
chr10	35656446	35657023
chr10	35658445	35658874
chr10	35660304	35660731
chr10	35664416	35665046
chr10	35666342	35666755
chr10	35667569	35668463
chr10	35669671	35670387
chr10	35675164	35675538
chr10	35675981	35676588
chr10	35677940	35678394
chr10	35685186	35685694
chr10	35696438	35696842
chr10	35698007	35698402
chr10	35708025	35708477
chr10	35716061	35716699
chr10	35722914	35723306
chr10	35725475	35725975
chr10	35727185	35727718
chr10	35728230	35728632
chr10	35745449	35746824
chr10	35753444	35754291
chr10	35762270	35763026
chr10	35774170	35774608
chr10	35776752	35777155
chr10	35791445	35792213
chr10	35794937	35795246
chr10	35822032	35822576
chr10	35882899	35883366
chr10	35893469	35894078
chr10	35920276	35920655
chr10	35924519	35925169
chr10	35959324	35959872
chr10	35968386	35968971
chr10	36018845	36019229
chr10	36020417	36020778
chr10	36112449	36112838
chr10	36131980	36132402
chr10	36151061	36151615
chr10	36201394	36201716
chr10	36203917	36204275
chr10	36213586	36213957
chr10	36218920	36219448
chr10	36227276	36227741
chr10	36269174	36270163
chr10	36368558	36368989
chr10	36413047	36413718
chr10	36445659	36446054
chr10	36501580	36501943
chr10	36511008	36512020
chr10	36514047	36514415
chr10	36517176	36517494
chr10	36529947	36530421
chr10	36540094	36540457
chr10	36541679	36542405
chr10	36548766	36549121
chr10	36582721	36583637
chr10	36667579	36668314
chr10	36696320	36696738
chr10	36752796	36753621
chr10	36778719	36779136
chr10	36818688	36819090
chr10	36827954	36829113
chr10	36833674	36834414
chr10	36836223	36836727
chr10	36843218	36843917
chr10	36863254	36864137
chr10	36957780	36958149
chr10	36960095	36960219
chr10	36964907	36965072
chr10	36967494	36967885
chr10	36998835	36999255
chr10	37005765	37006225
chr10	37039546	37040044
chr10	37050557	37051014
chr10	37054407	37054865
chr10	37055295	37056096
chr10	37095863	37096210
chr10	37131684	37132106
chr10	37139547	37139980
chr10	37173031	37173318
chr10	37209448	37209783
chr10	37272356	37272791
chr10	38185785	38186216
chr10	38236553	38237278
chr10	38305699	38306044
chr10	38339166	38339580
chr10	38342449	38343043
chr10	38379355	38379854
chr10	38422642	38423004
chr10	38731216	38731632
chr10	38732074	38732473
chr10	41965376	41965898
chr10	41993010	41993707
chr10	42058763	42059382
chr10	42182741	42183836
chr10	42267947	42268422
chr10	42290887	42291462
chr10	42367218	42368499
chr10	42450908	42451640
chr10	42454050	42454460
chr10	42569094	42569367
chr10	42585004	42585559
chr10	42597569	42597837
chr10	42652352	42652907
chr10	42681581	42682118
chr10	42742049	42742823
chr10	42767739	42768295
chr10	42834424	42834996
chr10	42858659	42860270
chr10	42891893	42892186
chr10	42892983	42893294
chr10	42920405	42921043
chr10	42953285	42953576
chr10	43017456	43018653
chr10	43071870	43073071
chr10	43108549	43109351
chr10	43120020	43120528
chr10	43123498	43124277
chr10	43138483	43138921
chr10	43152406	43152778
chr10	43165750	43166765
chr10	43169714	43170096
chr10	43177653	43178485
chr10	43211488	43212294
chr10	43224766	43225058
chr10	43236358	43236766
chr10	43251661	43252151
chr10	43270849	43271120
chr10	43277468	43277844
chr10	43384526	43385138
chr10	43389432	43389832
chr10	43422155	43423092
chr10	43464344	43464945
chr10	43487205	43487574
chr10	43494991	43495591
chr10	43505712	43506313
chr10	43661536	43662385
chr10	43678132	43678819
chr10	43683684	43684127
chr10	43693418	43694732
chr10	43720389	43720758
chr10	43725695	43726724
chr10	43755486	43755851
chr10	43780492	43780945
chr10	43995827	43996217
chr10	44049200	44049605
chr10	44113394	44113806
chr10	44129339	44129727
chr10	44132198	44132910
chr10	44191611	44192348
chr10	44199872	44200519
chr10	44202174	44202559
chr10	44208550	44209079
chr10	44214638	44214772
chr10	44292033	44292571
chr10	44332754	44333132
chr10	44422374	44422724
chr10	44434381	44435104
chr10	44466015	44466410
chr10	44490067	44490743
chr10	44497978	44498675
chr10	44539882	44540226
chr10	44576395	44577155
chr10	44611014	44611421
chr10	44617248	44618135
chr10	44619017	44619567
chr10	44622967	44623267
chr10	44648542	44648954
chr10	44673091	44673763
chr10	44678260	44678584
chr10	44680163	44680509
chr10	44693958	44694289
chr10	44718123	44719044
chr10	44723681	44724113
chr10	44728071	44728833
chr10	44765391	44765974
chr10	44771213	44771581
chr10	44775129	44775547
chr10	44790552	44790920
chr10	44795447	44795772
chr10	44816009	44816359
chr10	44891036	44891459
chr10	44907022	44908072
chr10	44911172	44911618
chr10	44951274	44951630
chr10	45065756	45066224
chr10	45095429	45096022
chr10	45189275	45189493
chr10	45235788	45236640
chr10	45243127	45243633
chr10	45372801	45373154
chr10	45373793	45374368
chr10	45392187	45392580
chr10	45410437	45410780
chr10	45487549	45487980
chr10	45542211	45542309
chr10	46403339	46404625
chr10	46428034	46428391
chr10	46428034	46428391
chr10	46441752	46443128
chr10	46453935	46454466
chr10	46470117	46470405
chr10	46477202	46477601
chr10	46478939	46479344
chr10	46555240	46555601
chr10	46570946	46571336
chr10	47069933	47070288
chr10	47125445	47125918
chr10	47975105	47975469
chr10	48062537	48062940
chr10	48180924	48181539
chr10	48183991	48184418
chr10	48190311	48191035
chr10	48191363	48191763
chr10	48193090	48194180
chr10	48262764	48263450
chr10	48280811	48281695
chr10	48571699	48572067
chr10	49077624	49078004
chr10	49167035	49168248
chr10	49184159	49184583
chr10	49185246	49185700
chr10	49195242	49195577
chr10	49243045	49243421
chr10	49334692	49335038
chr10	49354681	49355086
chr10	49404533	49404941
chr10	49512202	49512951
chr10	49534432	49535235
chr10	49536499	49536871
chr10	49682712	49683762
chr10	49813108	49813638
chr10	49992734	49993478
chr10	49993507	49993988
chr10	50230104	50230491
chr10	50273715	50274315
chr10	50412823	50413251
chr10	50417280	50418241
chr10	50457255	50458051
chr10	50471145	50471951
chr10	50472682	50473103
chr10	50485099	50485793
chr10	50488601	50488885
chr10	50491011	50491699
chr10	50507462	50507841
chr10	50518275	50518803
chr10	50522061	50522485
chr10	50525813	50526447
chr10	50541449	50541890
chr10	50639724	50640427
chr10	50709563	50709931
chr10	50711042	50711556
chr10	50712604	50712889
chr10	50714937	50715567
chr10	50718933	50719303
chr10	50796946	50797315
chr10	51157403	51157895
chr10	51158730	51159151
chr10	51170330	51170704
chr10	51188181	51188867
chr10	51235496	51235876
chr10	51242256	51242853
chr10	51244016	51244363
chr10	51245639	51246053
chr10	51682270	51683305
chr10	51724636	51725095
chr10	51752455	51753158
chr10	51753410	51753933
chr10	51756518	51757212
chr10	51847660	51847976
chr10	51899658	51900023
chr10	51973902	51974308
chr10	51980197	51980720
chr10	51991253	51991884
chr10	52033839	52034228
chr10	52040087	52041246
chr10	52053836	52054197
chr10	52083394	52084517
chr10	52169623	52170086
chr10	52219777	52220220
chr10	52279343	52279726
chr10	52421079	52421494
chr10	52503959	52504866
chr10	53087921	53088304
chr10	53129507	53129730
chr10	53646197	53646523
chr10	53662965	53663391
chr10	53738063	53738936
chr10	53744394	53744929
chr10	53764871	53765294
chr10	54454525	54454903
chr10	54501702	54502099
chr10	56231056	56231444
chr10	57031445	57031855
chr10	57060387	57061220
chr10	57327112	57327453
chr10	57369960	57370350
chr10	57788984	57790395
chr10	58016087	58016597
chr10	58034781	58035144
chr10	59563674	59564127
chr10	59693861	59694928
chr10	59697786	59698239
chr10	59753108	59753722
chr10	59765205	59765615
chr10	59768393	59769365
chr10	59782745	59783399
chr10	59785525	59785929
chr10	59814587	59815095
chr10	59942845	59943273
chr10	60528879	60529728
chr10	60713251	60713564
chr10	60791628	60793380
chr10	60982977	60983368
chr10	60986816	60987666
chr10	61036166	61036545
chr10	61038843	61039167
chr10	61098046	61098342
chr10	61137976	61139405
chr10	61237652	61237989
chr10	61239089	61239493
chr10	61334830	61335503
chr10	61340550	61340954
chr10	61421394	61421737
chr10	61427343	61427747
chr10	61459443	61459953
chr10	61559809	61560199
chr10	61570528	61570966
chr10	61640098	61640424
chr10	61710421	61710857
chr10	61727939	61728612
chr10	61734621	61735357
chr10	61740455	61740825
chr10	61763791	61764612
chr10	61780386	61780684
chr10	61789236	61789654
chr10	61797233	61797650
chr10	61814418	61815492
chr10	61818607	61819221
chr10	61837882	61838526
chr10	61876638	61877067
chr10	61894582	61894960
chr10	61905352	61905738
chr10	61910661	61911452
chr10	61919666	61920035
chr10	61926666	61927272
chr10	61951781	61952210
chr10	61955129	61955976
chr10	61976698	61977108
chr10	61999843	62000843
chr10	62002570	62002938
chr10	62074194	62074930
chr10	62075920	62076091
chr10	62080055	62080518
chr10	62107345	62107838
chr10	62135661	62135984
chr10	62148372	62149174
chr10	62162991	62163269
chr10	62187291	62187835
chr10	62207331	62207686
chr10	62211754	62213125
chr10	62213670	62214661
chr10	62247063	62247563
chr10	62254507	62255000
chr10	62258092	62258463
chr10	62373097	62373257
chr10	62416632	62417021
chr10	62421296	62421715
chr10	62428682	62429072
chr10	62430851	62431233
chr10	62476448	62476884
chr10	62478461	62478809
chr10	62489555	62489898
chr10	62554702	62555283
chr10	62569006	62569948
chr10	62583687	62584045
chr10	62594257	62594538
chr10	62620219	62620773
chr10	62699824	62700350
chr10	62713904	62714271
chr10	62723971	62724347
chr10	62743099	62743481
chr10	62762126	62762516
chr10	62819377	62821750
chr10	62827109	62827971
chr10	62882358	62883052
chr10	62893502	62893834
chr10	62895739	62895973
chr10	62917369	62917762
chr10	62925009	62926437
chr10	62926237	62926882
chr10	62928849	62929499
chr10	62937383	62937740
chr10	63037542	63038205
chr10	63039170	63039597
chr10	63042103	63042453
chr10	63046164	63046567
chr10	63047652	63047787
chr10	63092303	63092634
chr10	63118336	63118903
chr10	63163924	63164361
chr10	63181667	63182527
chr10	63185170	63186373
chr10	63187163	63187615
chr10	63212804	63213188
chr10	63223917	63224426
chr10	63264864	63265080
chr10	63266265	63266864
chr10	63267913	63268353
chr10	63299384	63299758
chr10	63333260	63333429
chr10	63338704	63339223
chr10	63366128	63366906
chr10	63368562	63368926
chr10	63370657	63371205
chr10	63373441	63373712
chr10	63400552	63400925
chr10	63404462	63404913
chr10	63414513	63414889
chr10	63416525	63416915
chr10	63424177	63424572
chr10	63449561	63449973
chr10	63466381	63466807
chr10	63468193	63468998
chr10	63474987	63476043
chr10	63479071	63479432
chr10	63480478	63481434
chr10	63485443	63486715
chr10	63501788	63502394
chr10	63502817	63503218
chr10	63503966	63504402
chr10	63505129	63505663
chr10	63510541	63510935
chr10	63511357	63511753
chr10	63513024	63513443
chr10	63514517	63514961
chr10	63523723	63524196
chr10	63524867	63525587
chr10	63538637	63539049
chr10	63596229	63596683
chr10	63601149	63601759
chr10	63625138	63625825
chr10	63667029	63667375
chr10	63694870	63695277
chr10	63698624	63699033
chr10	63736452	63737074
chr10	63803703	63804060
chr10	63859940	63860589
chr10	63867875	63868301
chr10	63873848	63874219
chr10	63889365	63889731
chr10	63989324	63990250
chr10	63994206	63994613
chr10	64047068	64047462
chr10	64048342	64048721
chr10	64067271	64067647
chr10	64070296	64070748
chr10	64083025	64083421
chr10	64084147	64084686
chr10	64119789	64120162
chr10	64121512	64122413
chr10	64200655	64201159
chr10	64233722	64234329
chr10	64246694	64247242
chr10	64342232	64342886
chr10	64392030	64392475
chr10	64415920	64416397
chr10	64421871	64422331
chr10	64426578	64427112
chr10	64482929	64483353
chr10	64493663	64495153
chr10	64498099	64498491
chr10	64513828	64514239
chr10	64563070	64563889
chr10	64566587	64567541
chr10	64575047	64575426
chr10	64626596	64627062
chr10	64627409	64627881
chr10	64630784	64631352
chr10	64637438	64637711
chr10	64686633	64686971
chr10	64694885	64695371
chr10	64698473	64699183
chr10	64826700	64827595
chr10	64844461	64845134
chr10	64858717	64859132
chr10	64860473	64860906
chr10	64864806	64865255
chr10	64895887	64896246
chr10	64915885	64916280
chr10	64921699	64922109
chr10	64950359	64950759
chr10	65002598	65003042
chr10	65010372	65010915
chr10	65035427	65035833
chr10	65044067	65044553
chr10	65056585	65057636
chr10	65059404	65059892
chr10	65067502	65068704
chr10	65071611	65071908
chr10	65094614	65094726
chr10	65101016	65101594
chr10	65112051	65112410
chr10	65117963	65118367
chr10	65119391	65120774
chr10	65120975	65121695
chr10	65129851	65130187
chr10	65132194	65132582
chr10	65133550	65133935
chr10	65141980	65142758
chr10	65148178	65148637
chr10	65150264	65150989
chr10	65192177	65192602
chr10	65196992	65197405
chr10	65205259	65205949
chr10	65296086	65296446
chr10	65319946	65320298
chr10	65325808	65326909
chr10	65331726	65332499
chr10	65359588	65360128
chr10	65466696	65467414
chr10	65471075	65471348
chr10	65499336	65500402
chr10	65776223	65776597
chr10	66239337	66239830
chr10	66623840	66624339
chr10	66753628	66754020
chr10	67000542	67000996
chr10	67226413	67226839
chr10	67736500	67737103
chr10	68355801	68356113
chr10	69095302	69095786
chr10	69125700	69126219
chr10	69127990	69128097
chr10	69193248	69193838
chr10	69220197	69221322
chr10	69224130	69224510
chr10	69241102	69241527
chr10	69246550	69246900
chr10	69249595	69249958
chr10	69254938	69255570
chr10	69257598	69258076
chr10	69258552	69259098
chr10	69263378	69263696
chr10	69265054	69265405
chr10	69265944	69266492
chr10	69267878	69268462
chr10	69279610	69279835
chr10	69291733	69292115
chr10	69293009	69293581
chr10	69313939	69314410
chr10	69315768	69316287
chr10	69389576	69390044
chr10	69504151	69504662
chr10	69515757	69516121
chr10	69524745	69525396
chr10	69529080	69529989
chr10	69535585	69536007
chr10	69539155	69539948
chr10	69548382	69548517
chr10	69583865	69584249
chr10	69595026	69595877
chr10	69608903	69609200
chr10	69616048	69616442
chr10	69660963	69661370
chr10	69700793	69701306
chr10	69726993	69727511
chr10	69758576	69758755
chr10	69761370	69761777
chr10	69765875	69766349
chr10	69837058	69837541
chr10	69892445	69892851
chr10	69901675	69902078
chr10	69956621	69957158
chr10	69983023	69983422
chr10	69990738	69991519
chr10	69991629	69992171
chr10	70029648	70030222
chr10	70051942	70052923
chr10	70131083	70131387
chr10	70152338	70152872
chr10	70243124	70243772
chr10	70246113	70246764
chr10	70256672	70257273
chr10	70300809	70301260
chr10	70330327	70330679
chr10	70332681	70333122
chr10	70333824	70334736
chr10	70370034	70370698
chr10	70385105	70385364
chr10	70390792	70391161
chr10	70399113	70399520
chr10	70419049	70419449
chr10	70421215	70421611
chr10	70422853	70423240
chr10	70461038	70461632
chr10	70474128	70474483
chr10	70484498	70484948
chr10	70491403	70492019
chr10	70515827	70516505
chr10	70553012	70553488
chr10	70610554	70611255
chr10	70643456	70643815
chr10	70645929	70646756
chr10	70647211	70647551
chr10	70649555	70650383
[truncated: 88,470 more rows]

## Sheet: EWS502 H3K4me3 peaks
chr10	109563	109868
chr10	111926	112409
chr10	168631	169024
chr10	172150	172599
chr10	173871	174649
chr10	350121	350767
chr10	362706	363262
chr10	365194	365866
chr10	406119	406617
chr10	520390	520887
chr10	583001	583422
chr10	685889	686281
chr10	719287	719749
chr10	724510	725102
chr10	728935	729274
chr10	808885	809259
chr10	810950	812411
chr10	820392	820999
chr10	966375	966912
chr10	1024653	1025027
chr10	1082286	1082444
chr10	1084161	1084529
chr10	1092804	1093283
chr10	1146316	1146735
chr10	1156631	1157200
chr10	1540036	1540758
chr10	1549116	1549496
chr10	1637395	1637848
chr10	1769063	1769412
chr10	1922679	1923125
chr10	1955851	1956353
chr10	2000935	2001355
chr10	2048841	2049680
chr10	2051473	2051893
chr10	2234580	2235035
chr10	2257922	2258410
chr10	2312573	2312934
chr10	2313618	2314012
chr10	2400250	2400624
chr10	2533542	2533640
chr10	2700688	2701072
chr10	2703086	2703429
chr10	2704522	2704861
chr10	2714031	2714556
chr10	2798586	2799170
chr10	2888213	2888728
chr10	2915009	2915371
chr10	2923233	2923576
chr10	2932628	2932964
chr10	2941047	2941477
chr10	2965209	2965771
chr10	2968704	2969252
chr10	3009767	3010226
chr10	3075942	3076659
chr10	3099867	3100514
chr10	3126143	3126551
chr10	3204400	3205049
chr10	3225197	3225976
chr10	3229697	3230077
chr10	3273279	3273666
chr10	3813207	3813681
chr10	3816958	3817514
chr10	3839876	3840262
chr10	4164105	4164750
chr10	4694804	4695187
chr10	4721818	4722176
chr10	4812622	4813028
chr10	4847302	4847699
chr10	4857635	4859124
chr10	4881650	4882060
chr10	4919457	4919747
chr10	5073629	5074179
chr10	5126444	5126970
chr10	5324049	5324480
chr10	5326132	5326541
chr10	5444495	5444981
chr10	5478541	5478750
chr10	5585895	5586455
chr10	5710572	5710964
chr10	5745678	5746615
chr10	5747704	5748555
chr10	5766675	5767724
chr10	5895072	5895470
chr10	5944904	5945350
chr10	5970656	5971141
chr10	6059341	6060042
chr10	6133033	6133480
chr10	6165557	6166500
chr10	6168270	6168584
chr10	6171132	6172316
chr10	6176579	6178031
chr10	6206629	6207061
chr10	6210735	6211197
chr10	6226913	6227407
chr10	6245735	6246040
chr10	6284835	6285518
chr10	6301042	6301499
chr10	6361402	6361774
chr10	6374361	6374760
chr10	6382328	6382715
chr10	6395307	6395647
chr10	6423665	6424340
chr10	6429002	6431125
chr10	6463866	6464401
chr10	7607646	7608284
chr10	7869665	7870041
chr10	7872422	7873306
chr10	7900803	7901398
chr10	8126851	8127554
chr10	8132309	8132672
chr10	8135428	8136195
chr10	8326839	8327209
chr10	8380586	8381226
chr10	8414208	8414648
chr10	8564654	8564752
chr10	8584641	8585139
chr10	8592823	8593455
chr10	8594550	8595190
chr10	8595650	8596054
chr10	8596162	8596332
chr10	8596723	8597363
chr10	8599379	8599768
chr10	11530657	11531338
chr10	11692696	11693226
chr10	11755429	11756003
chr10	11819485	11819887
chr10	11824418	11824738
chr10	11878274	11878486
chr10	11881700	11882065
chr10	11902220	11902413
chr10	11905624	11906173
chr10	11988816	11989390
chr10	12123998	12124525
chr10	12136064	12136415
chr10	12144997	12145386
chr10	12151270	12151601
chr10	12211113	12211561
chr10	12278138	12278829
chr10	12301575	12301957
chr10	12346262	12346623
chr10	12405057	12405438
chr10	12431129	12431326
chr10	12432084	12432930
chr10	12565806	12566479
chr10	12865139	12865857
chr10	13181700	13182081
chr10	13243949	13244386
chr10	13245762	13246230
chr10	13353974	13354609
chr10	13381572	13382083
chr10	13384099	13384534
chr10	13430205	13430760
chr10	13473302	13473640
chr10	13611144	13611553
chr10	13668853	13669464
chr10	13766264	13766975
chr10	13788843	13790093
chr10	13799926	13800386
chr10	13869201	13869638
chr10	14155977	14156513
chr10	14685566	14686043
chr10	14707922	14708316
chr10	14730091	14731008
chr10	14920241	14920697
chr10	14960250	14960766
chr10	15036250	15036526
chr10	15041288	15041543
chr10	15165774	15166496
chr10	15170407	15170929
chr10	15179060	15179393
chr10	15248672	15248995
chr10	15250337	15250730
chr10	15264320	15264686
chr10	15395882	15396297
chr10	15427208	15428250
chr10	15451545	15451909
chr10	15468024	15468402
chr10	15516133	15517094
chr10	15521364	15522004
chr10	15941619	15942448
chr10	15984519	15985226
chr10	16518784	16519409
chr10	16522317	16522982
chr10	16603332	16603843
chr10	16898622	16899529
chr10	16914354	16915274
chr10	17031764	17032332
chr10	17067396	17067766
chr10	17068443	17068973
chr10	17107584	17108247
chr10	17111451	17112370
chr10	17282988	17283425
chr10	17311751	17312076
chr10	17699483	17699848
chr10	17726162	17726831
chr10	18469819	18470175
chr10	18473832	18474267
chr10	18524165	18524531
chr10	18956199	18956569
chr10	18980651	18981021
chr10	18988634	18989009
chr10	19246075	19246357
chr10	19440933	19441625
chr10	20145562	20145927
chr10	20295573	20296010
chr10	20490394	20490997
chr10	20735435	20735814
chr10	21324022	21324378
chr10	21398831	21399247
chr10	21502379	21502855
chr10	21621843	21622305
chr10	21693229	21694174
chr10	21702016	21702450
chr10	21731137	21731788
chr10	21752744	21753184
chr10	21825681	21825975
chr10	21846308	21846844
chr10	21850765	21851191
chr10	21854608	21854984
chr10	21857804	21858152
chr10	21862633	21863001
chr10	22136167	22136566
chr10	22331887	22332257
chr10	22558135	22558512
chr10	22580526	22581470
chr10	22645290	22646240
chr10	22649963	22650712
chr10	22654167	22654546
chr10	22665622	22665821
chr10	22669325	22669600
chr10	22674145	22674882
chr10	22701174	22701815
chr10	22765858	22766233
chr10	22804552	22805045
chr10	22929063	22929353
chr10	23042979	23043403
chr10	23256338	23257414
chr10	23384553	23385263
chr10	23392349	23392728
chr10	23393757	23395076
chr10	23424331	23424943
chr10	23502102	23502721
chr10	23620358	23621022
chr10	23673139	23673843
chr10	23769053	23769680
chr10	23777951	23778831
chr10	23986190	23986741
chr10	24016654	24017091
chr10	24023945	24024305
chr10	24031949	24032337
chr10	24336090	24336454
chr10	24337303	24338246
chr10	24447018	24447369
chr10	24457375	24457825
chr10	24525480	24525897
chr10	24538830	24539219
chr10	24648383	24648822
chr10	24674026	24674433
chr10	24679981	24680322
chr10	24718611	24719082
chr10	24847647	24848037
chr10	25045044	25045713
chr10	25052702	25053672
chr10	25160459	25160826
chr10	25180732	25181083
chr10	25195990	25196479
chr10	25258111	25258516
chr10	25281074	25281659
chr10	25345523	25345985
chr10	25442294	25442652
chr10	25503681	25503908
chr10	25505482	25505999
chr10	25835884	25836292
chr10	25958505	25958858
chr10	26072261	26072557
chr10	26075216	26075663
chr10	26095770	26096134
chr10	26263551	26264018
chr10	26664109	26664822
chr10	26895742	26896202
chr10	26995251	26995654
chr10	27002513	27003773
chr10	27020830	27021268
chr10	27027174	27027649
chr10	27183953	27184983
chr10	27189400	27189974
chr10	27210597	27210999
chr10	27428799	27429165
chr10	27482695	27483032
chr10	27569009	27569796
chr10	27588097	27588602
chr10	27833346	27833452
chr10	27857296	27857647
chr10	28008779	28009186
chr10	28071697	28072056
chr10	28327187	28327657
chr10	28398525	28398955
chr10	28547013	28547476
chr10	28565506	28565952
chr10	28631617	28632115
chr10	28861683	28862026
chr10	28997822	28998216
chr10	29007054	29007426
chr10	29010192	29010540
chr10	29038094	29038486
chr10	29050883	29051753
chr10	29059199	29059564
chr10	29151606	29151938
chr10	29161933	29162339
chr10	29181800	29182664
chr10	29204592	29205327
chr10	29268240	29268678
chr10	29370600	29371050
chr10	29531506	29531909
chr10	29582060	29582805
chr10	29583135	29583510
chr10	29595442	29596075
chr10	29699154	29699539
chr10	29709439	29709563
chr10	29738515	29738619
chr10	29740057	29741532
chr10	29919021	29919504
chr10	29946766	29947247
chr10	29963635	29964203
chr10	29964731	29965160
chr10	29975579	29975857
chr10	30017087	30017492
chr10	30020554	30021534
chr10	30032035	30032341
chr10	30064540	30064912
chr10	30178405	30178871
chr10	30237932	30238392
chr10	30388125	30388542
chr10	30548947	30549422
chr10	30677703	30678299
chr10	30721583	30721999
chr10	30760348	30761008
chr10	30762094	30762778
chr10	30882873	30883120
chr10	31112904	31113487
chr10	31147694	31148746
chr10	31360933	31361360
chr10	31647749	31648063
chr10	31931865	31932604
chr10	31978951	31979472
chr10	32088717	32089140
chr10	32258298	32258698
chr10	32298775	32299215
chr10	32384221	32385088
chr10	32547171	32547577
chr10	32580375	32580763
chr10	32675523	32675900
chr10	32694370	32694795
chr10	32697139	32697583
chr10	32699330	32699754
chr10	32707805	32708092
chr10	32730003	32730989
chr10	32775120	32775633
chr10	33287339	33288015
chr10	33309644	33309934
chr10	33334537	33334779
chr10	33378562	33379809
chr10	33451030	33451461
chr10	33493374	33493728
chr10	33602382	33602775
chr10	33643477	33643846
chr10	33663178	33663619
chr10	33849735	33850145
chr10	33990648	33991310
chr10	34065227	34065653
chr10	34100745	34102916
chr10	34245971	34246413
chr10	34506332	34507002
chr10	34514689	34515279
chr10	34523119	34523533
chr10	34568121	34568489
chr10	34569457	34570375
chr10	34735957	34736931
chr10	34855424	34855970
chr10	34910230	34910881
chr10	34964817	34966008
chr10	34995376	34995763
chr10	35050133	35050663
chr10	35068711	35069103
chr10	35109760	35110419
chr10	35138184	35138836
chr10	35143756	35144065
chr10	35158944	35159751
chr10	35182940	35183325
chr10	35236824	35237812
chr10	35247791	35248157
chr10	35251085	35251528
chr10	35286922	35288329
chr10	35350114	35350943
chr10	35419405	35419611
chr10	35456348	35456877
chr10	35524796	35525215
chr10	35549506	35549844
chr10	35597378	35598049
chr10	35600124	35601118
chr10	35665847	35666241
chr10	35697310	35698489
chr10	35706987	35708501
chr10	35709146	35710556
chr10	35723346	35723738
chr10	35776760	35777118
chr10	35779674	35780088
chr10	35846410	35846780
chr10	35969339	35969754
chr10	36151421	36151811
chr10	36201099	36201492
chr10	36218787	36219417
chr10	36227816	36227981
chr10	36228169	36228607
chr10	36516961	36517954
chr10	36540134	36540755
chr10	36842974	36843631
chr10	36852874	36853258
chr10	36964470	36964831
chr10	37050523	37050901
chr10	37131228	37131687
chr10	37139528	37140114
chr10	38185799	38186186
chr10	38232639	38233046
chr10	38304927	38305222
chr10	38339530	38339954
chr10	38423204	38423806
chr10	38685380	38685478
chr10	38730905	38731475
chr10	42183114	42183604
chr10	42290865	42291453
chr10	42367813	42368353
chr10	42454167	42454428
chr10	42568789	42569390
chr10	42569576	42569894
chr10	42598283	42598492
chr10	42681658	42682333
chr10	42892979	42893850
chr10	42920816	42921161
chr10	42953272	42953576
chr10	43120148	43120530
chr10	43211467	43212338
chr10	43216115	43216479
chr10	43217128	43217523
chr10	43223698	43224007
chr10	43235989	43236280
chr10	43251696	43252330
chr10	43270782	43271136
chr10	43389863	43390145
chr10	43421770	43422153
chr10	43464368	43464741
chr10	43495091	43495472
chr10	43505690	43506318
chr10	43661683	43662103
chr10	44049302	44049705
chr10	44199766	44200565
chr10	44462615	44463565
chr10	44465999	44466419
chr10	44497918	44498594
chr10	44680127	44680515
chr10	44693616	44694572
chr10	44728084	44728762
chr10	44765235	44765603
chr10	44771083	44771975
chr10	44775138	44775532
chr10	44793996	44794380
chr10	44816645	44817234
chr10	45039636	45040013
chr10	45065334	45065742
chr10	45189298	45189610
chr10	45410079	45410442
chr10	45487473	45488065
chr10	45542208	45542312
chr10	46428412	46428724
chr10	46443057	46443614
chr10	46478511	46478894
chr10	47069751	47070603
chr10	47123877	47124989
chr10	47125861	47126594
chr10	47974278	47975069
chr10	48193242	48193644
chr10	48572107	48572490
chr10	49185001	49185648
chr10	49534326	49534982
chr10	50195139	50195602
chr10	50416756	50417197
chr10	50457223	50457997
chr10	50491226	50491559
chr10	50507470	50508734
chr10	50518301	50519073
chr10	50520304	50520687
chr10	50524637	50525067
chr10	50525883	50526352
chr10	50639815	50640292
chr10	50709632	50709946
chr10	51158750	51159174
chr10	51235112	51235501
chr10	51242270	51242726
chr10	51292609	51293013
chr10	51497676	51497838
chr10	51848027	51848371
chr10	52033868	52034266
chr10	52054660	52055426
chr10	52089451	52090126
chr10	52169629	52170195
chr10	52421122	52421503
chr10	52503934	52504915
chr10	53128736	53129441
chr10	53663024	53663413
chr10	53738039	53738799
chr10	53744316	53744992
chr10	53764722	53765383
chr10	57031431	57031842
chr10	57060661	57061149
chr10	57790372	57790973
chr10	59699184	59699533
chr10	59700468	59700895
chr10	59765195	59765803
chr10	59815114	59815483
chr10	59942719	59943190
chr10	60738119	60738656
chr10	60791535	60793280
chr10	61138218	61139350
chr10	61335776	61336152
chr10	61338112	61338541
chr10	61570515	61570913
chr10	61818575	61819102
chr10	62002213	62002580
chr10	62135526	62136042
chr10	62162875	62163315
chr10	62208170	62208699
chr10	62372947	62373875
chr10	62430629	62431216
chr10	62594377	62594687
chr10	62882618	62883062
chr10	62898821	62899529
chr10	63092623	63093097
chr10	63267398	63267802
chr10	63299444	63299753
chr10	63327167	63327525
chr10	63328574	63329074
chr10	63333026	63333443
chr10	63338095	63338845
chr10	63422772	63423148
chr10	63423910	63424574
chr10	63475158	63475892
chr10	63476330	63476993
chr10	63478649	63479278
chr10	63513005	63513427
chr10	63697573	63698539
chr10	63803537	63804057
chr10	63874276	63874568
chr10	63993942	63994290
chr10	64234917	64235311
chr10	64246902	64247293
chr10	64482954	64483353
chr10	64563176	64563366
chr10	64694827	64695672
chr10	64698496	64699177
chr10	64895194	64895766
chr10	64921693	64922071
chr10	64950763	64950966
chr10	65056858	65057471
chr10	65060350	65060798
chr10	65062344	65062767
chr10	65071445	65071850
chr10	65094614	65094723
chr10	65129683	65130136
chr10	65141888	65142712
chr10	65143530	65143939
chr10	65295993	65296323
chr10	65466045	65466397
chr10	65471071	65471497
chr10	66999968	67000969
chr10	69125774	69126159
chr10	69193880	69194294
chr10	69241103	69241596
chr10	69265599	69265954
chr10	69267641	69268140
chr10	69279227	69279798
chr10	69314674	69315333
chr10	69504571	69505182
chr10	69583888	69584286
chr10	69660954	69661369
chr10	69701011	69701392
chr10	69726922	69727457
chr10	69758435	69758840
chr10	69761748	69762152
chr10	69835920	69836916
chr10	69901095	69901833
chr10	69956948	69957381
chr10	69989917	69990350
chr10	70029876	70030256
chr10	70151430	70151823
chr10	70256687	70257298
chr10	70331280	70331669
chr10	70385862	70386218
chr10	70418434	70418901
chr10	70460895	70461693
chr10	70553413	70553788
chr10	70610252	70610637
chr10	70667415	70667933
chr10	70672607	70673427
chr10	70748462	70749582
chr10	70757531	70758356
chr10	70767356	70767981
chr10	70836466	70836868
chr10	70838623	70839168
chr10	70868322	70869044
chr10	70881160	70881551
chr10	70898546	70899531
chr10	71060281	71060449
chr10	71114449	71114809
chr10	71231671	71231966
chr10	71364805	71365967
chr10	71393154	71393961
chr10	71468026	71468369
chr10	71470356	71470773
chr10	71472203	71472672
chr10	71482269	71482574
chr10	71486245	71486649
chr10	71488836	71489317
chr10	71489443	71489818
chr10	71573377	71573895
chr10	71575493	71576026
chr10	71599195	71599978
chr10	71662587	71662897
chr10	71759945	71760736
chr10	71761678	71762097
chr10	71782743	71783039
chr10	71784993	71785356
chr10	71811904	71812401
chr10	71834490	71834625
chr10	71871254	71871595
chr10	71908801	71909395
chr10	72015020	72015500
chr10	72094265	72094611
chr10	72101638	72102243
chr10	72123472	72124331
chr10	72246010	72246397
chr10	72317684	72317955
chr10	72361802	72362305
chr10	72412217	72412808
chr10	72638643	72639053
chr10	72640040	72640904
chr10	72642619	72643082
chr10	72646981	72647507
chr10	72665987	72666640
chr10	72674302	72674729
chr10	72748968	72749523
chr10	72826881	72828223
chr10	72854649	72855141
chr10	72861358	72861668
chr10	72865786	72866115
chr10	73064541	73064924
chr10	73128833	73129357
chr10	73202988	73203396
chr10	73265986	73266611
chr10	73276696	73277047
chr10	73277499	73278295
chr10	73280793	73281123
chr10	73318449	73319077
chr10	73394474	73395028
chr10	73488772	73489172
chr10	73517707	73518417
chr10	73525917	73526297
chr10	73587941	73588359
chr10	73616229	73617135
chr10	73645765	73646138
chr10	73690662	73691047
chr10	73703599	73704178
chr10	73727236	73727833
chr10	73749566	73750048
chr10	73784418	73784772
chr10	73794216	73794589
chr10	74041373	74041794
chr10	74055318	74055932
chr10	74122204	74122576
chr10	74214289	74214749
chr10	74525568	74526681
chr10	74597494	74597885
chr10	74617738	74618712
chr10	74676773	74676994
chr10	74682497	74682888
chr10	74787867	74788611
chr10	74843247	74843769
chr10	74924771	74925764
chr10	75055182	75055807
chr10	75077229	75077558
chr10	75160042	75160357
chr10	75174317	75174456
chr10	75202722	75203147
chr10	75211779	75212123
chr10	75215604	75216250
chr10	75240824	75241244
chr10	75304012	75304390
chr10	75317240	75317595
chr10	75340304	75340890
chr10	75375304	75375643
chr10	75395354	75396185
chr10	75427803	75428171
chr10	75430627	75431031
chr10	75442176	75442601
chr10	75580912	75581868
chr10	75606441	75606835
chr10	75847465	75848408
chr10	76015251	76015787
chr10	76255187	76255881
chr10	76262445	76263132
chr10	76263583	76264063
chr10	76336547	76336862
chr10	76398519	76398964
chr10	76494710	76495417
chr10	76514566	76514952
chr10	76541305	76542283
chr10	76639955	76640291
chr10	76665240	76665582
chr10	76669092	76669686
chr10	76713074	76713610
chr10	76724942	76725385
chr10	76830770	76831118
chr10	76838643	76839473
chr10	77738859	77739266
chr10	79140983	79141443
chr10	79265998	79266765
chr10	79355821	79356421
chr10	79458633	79459386
chr10	79463567	79463927
chr10	79566925	79567261
chr10	79569097	79569463
chr10	79569697	79570081
chr10	79607111	79607945
chr10	79659577	79659992
chr10	79732627	79732992
chr10	79836979	79837345
chr10	80184095	80184596
chr10	80402936	80403410
chr10	80426262	80426733
chr10	80499305	80499654
chr10	80544279	80544830
chr10	80624959	80625409
chr10	80633176	80633580
chr10	80672336	80672792
chr10	80685029	80685557
chr10	80747251	80747623
chr10	80777616	80777796
chr10	80808252	80808661
chr10	80833747	80834776
chr10	80874898	80875261
chr10	81576518	81576860
chr10	81577212	81578375
chr10	81654567	81655178
chr10	81731435	81731790
chr10	81828338	81828727
chr10	81881891	81882529
chr10	81908533	81909056
chr10	81954297	81954832
chr10	82106101	82106674
chr10	82158677	82158953
chr10	82194347	82194702
chr10	82204579	82205313
chr10	82212379	82213211
chr10	82213731	82213855
chr10	82213970	82214309
chr10	82215030	82215128
chr10	82412566	82412970
chr10	82444714	82445169
chr10	83624318	83624651
chr10	83624993	83625630
chr10	85182248	85182937
chr10	85889214	85889665
chr10	86058394	86058864
chr10	86078227	86078653
chr10	86174437	86174887
chr10	86290365	86290708
chr10	88126824	88127221
chr10	88143156	88143905
chr10	88149676	88150149
chr10	88161435	88161835
chr10	88271932	88272233
chr10	88335049	88335512
chr10	88382134	88382460
chr10	88443386	88443684
chr10	88460999	88461508
chr10	88505655	88506165
chr10	88615611	88616038
chr10	88617988	88618596
chr10	88689382	88689712
chr10	88703751	88704072
chr10	88708228	88708662
chr10	88845224	88845744
chr10	88953885	88954303
chr10	89253933	89255114
chr10	89358091	89358473
chr10	89409620	89410218
chr10	89484676	89485159
chr10	89567999	89568616
chr10	89612063	89613277
chr10	89617900	89618777
chr10	89672868	89673321
chr10	89877384	89877778
chr10	90136825	90137250
chr10	90570069	90570548
chr10	90630161	90630507
chr10	90684847	90685260
chr10	90701479	90701988
chr10	90725114	90725563
chr10	90740158	90740819
chr10	90744998	90745801
chr10	90836598	90837128
chr10	90957413	90957855
chr10	91001314	91001679
chr10	91051757	91052083
chr10	91077282	91077886
chr10	91081999	91082869
chr10	91141909	91142234
chr10	91163898	91164434
chr10	91284833	91285334
chr10	91393746	91394247
chr10	91451262	91451656
chr10	92607856	92608179
chr10	92621622	92622051
chr10	92680242	92680698
chr10	92713068	92713472
chr10	92784368	92784992
chr10	92882645	92883160
chr10	92884914	92885336
chr10	92886438	92886829
chr10	92912998	92913281
chr10	92970296	92970820
chr10	93034248	93035209
chr10	93039369	93039796
chr10	93048033	93048362
chr10	93159493	93159767
chr10	93162113	93162510
chr10	93290200	93290885
chr10	93291637	93292452
chr10	93346825	93347648
chr10	93358372	93358959
chr10	93382502	93382883
chr10	93546090	93546501
chr10	93548541	93548977
chr10	93636912	93637917
chr10	93658635	93659015
chr10	93673721	93674042
chr10	93989612	93989865
chr10	93992587	93993329
chr10	94040878	94041392
chr10	94162693	94163133
chr10	94255467	94256160
chr10	94323881	94324285
chr10	94342758	94343505
chr10	94346732	94347153
chr10	94439628	94440132
chr10	94448909	94449720
chr10	94580796	94581145
chr10	94598166	94598432
chr10	94811508	94812963
chr10	94821854	94822009
chr10	94823604	94824015
chr10	94948537	94948906
chr10	95024252	95025363
chr10	95162988	95163743
chr10	95231927	95232318
chr10	95246309	95246764
chr10	95350897	95351546
chr10	95452369	95452657
chr10	95575658	95576592
chr10	95643348	95643721
chr10	95725436	95725842
chr10	95743786	95744232
chr10	95791964	95792310
chr10	95792859	95793287
chr10	95838579	95839432
chr10	95881911	95882323
chr10	95883177	95883583
chr10	95952088	95952471
chr10	95954007	95954375
chr10	95991073	95991442
chr10	96112218	96112780
chr10	96151947	96152969
chr10	96295720	96295879
chr10	96932972	96933569
chr10	97309970	97311073
chr10	97405571	97405967
chr10	97443343	97443594
chr10	97491506	97492040
chr10	97505992	97506701
chr10	97565520	97565929
chr10	97657661	97657990
chr10	97793268	97795051
chr10	97839619	97840014
chr10	97871435	97872023
chr10	97874323	97874736
chr10	97880210	97880678
chr10	97963668	97964581
chr10	98021068	98021508
chr10	98124794	98125159
chr10	98166171	98166780
chr10	98263384	98263695
chr10	98330162	98330527
chr10	98335929	98336649
chr10	98470232	98470983
chr10	98490847	98491250
chr10	98551234	98551769
chr10	98583088	98583709
chr10	98628277	98628828
chr10	98787187	98787757
chr10	98929659	98929982
chr10	98935461	98935942
chr10	98946154	98946573
chr10	99042163	99042494
chr10	99068670	99069043
chr10	99083215	99084114
chr10	99087010	99087676
chr10	99150812	99151162
chr10	99157008	99157667
chr10	99175974	99176649
chr10	99195021	99195888
chr10	99247511	99247869
chr10	99250639	99251390
chr10	99382397	99383098
chr10	99390174	99391540
chr10	99436431	99437092
chr10	99463624	99464259
chr10	99466139	99466716
chr10	99486786	99487165
chr10	99538437	99538859
chr10	99884506	99885529
chr10	100018243	100018655
chr10	100058611	100059580
chr10	100098887	100099321
chr10	100164608	100165013
chr10	100195698	100196706
chr10	100217258	100217763
chr10	100544794	100545303
chr10	100983867	100984264
chr10	101079719	101080874
chr10	101180084	101180516
chr10	101269835	101270155
chr10	101273101	101273681
chr10	101284663	101285196
chr10	101290344	101290645
chr10	101301321	101301693
chr10	101369245	101370110
chr10	101409174	101409614
chr10	101481547	101481937
chr10	101595738	101596236
chr10	101663310	101663813
chr10	101667652	101668096
chr10	101733243	101733640
chr10	101734427	101734761
chr10	101756197	101756972
chr10	101758792	101759510
chr10	101932877	101934060
chr10	101935036	101935848
chr10	101978580	101979035
chr10	102017094	102017495
chr10	102036052	102036492
chr10	102065563	102065983
chr10	102076796	102077302
chr10	102097490	102097949
chr10	102105617	102105947
chr10	102123254	102123923
chr10	102231843	102232151
chr10	102279305	102279720
chr10	102285548	102286150
chr10	102404583	102405271
chr10	102420575	102420981
chr10	102462903	102463419
chr10	102576878	102577340
chr10	102578060	102578397
chr10	102615252	102616835
chr10	102628000	102628419
chr10	102662819	102663083
chr10	102719221	102719914
chr10	102736219	102737289
chr10	102749607	102750164
chr10	102781096	102781849
chr10	102792660	102792928
chr10	102796662	102797010
chr10	102800150	102800395
chr10	102807223	102807808
chr10	102810481	102810833
chr10	102817545	102817847
chr10	102870522	102871448
chr10	102887432	102888053
chr10	102896312	102897007
chr10	102911595	102911960
chr10	102912835	102913238
chr10	102963501	102964296
chr10	102965961	102966319
chr10	103040851	103043145
chr10	103060615	103061133
chr10	103080423	103080781
chr10	103104240	103104667
chr10	103105483	103106294
chr10	103235496	103235865
chr10	103319599	103320116
chr10	103337467	103338040
chr10	103344923	103345318
chr10	103345593	103345971
chr10	103444309	103444782
chr10	103497783	103498182
chr10	103520152	103520918
chr10	103532847	103533102
chr10	103567915	103568251
chr10	103580303	103580794
chr10	103589217	103590308
chr10	103590569	103591245
chr10	103805263	103806018
chr10	103815001	103815578
chr10	103864022	103864402
chr10	103869571	103869933
chr10	103883369	103884000
chr10	103902018	103902379
chr10	103919331	103919945
chr10	103975568	103975958
chr10	103980515	103980875
chr10	103991402	103991815
chr10	103995550	103995897
chr10	104144178	104144764
chr10	104149170	104149459
chr10	104159805	104160362
chr10	104170452	104170843
chr10	104181490	104182506
chr10	104199740	104200349
chr10	104211070	104211698
chr10	104212250	104212819
chr10	104252082	104252366
chr10	104276296	104276659
chr10	104328795	104329357
chr10	104361405	104361809
chr10	104395058	104395425
chr10	104464252	104464753
chr10	104467943	104468711
chr10	104494014	104494388
chr10	104525860	104526241
chr10	104535207	104535868
chr10	104578990	104579427
chr10	104603949	104604322
chr10	104619289	104619923
chr10	104667940	104668281
chr10	104938342	104938953
chr10	104942012	104943071
chr10	105027123	105027357
chr10	105099641	105100664
chr10	105117661	105118851
chr10	105146485	105146767
chr10	105201463	105202177
chr10	105235555	105235947
chr10	105243569	105243862
chr10	105244185	105244595
chr10	105292818	105293215
chr10	105304956	105305673
chr10	105333933	105334263
chr10	105334391	105334722
chr10	105410674	105411079
chr10	105442597	105443022
chr10	105604511	105605157
chr10	105657810	105658477
chr10	105667475	105667976
chr10	105716230	105716872
chr10	105721129	105721526
chr10	105871832	105872411
chr10	105981798	105982027
chr10	106004539	106005288
chr10	106018085	106018658
chr10	106024361	106024924
chr10	106040640	106041783
chr10	106048718	106049126
chr10	106067396	106067916
chr10	106078393	106078731
chr10	106087930	106088255
chr10	106103032	106103417
chr10	106112118	106112502
chr10	106191703	106192323
chr10	106199093	106199411
chr10	106430469	106430795
chr10	108296426	108297242
chr10	108299264	108299667
chr10	108520423	108521161
chr10	108913898	108914193
chr10	108982444	108982865
chr10	109663897	109664596
chr10	109664859	109665267
chr10	110186027	110186370
chr10	110215587	110216260
chr10	110344171	110344596
chr10	110661633	110662105
chr10	110942373	110942779
chr10	110980899	110981300
chr10	111038795	111039430
chr10	111205831	111207315
chr10	111601264	111602941
chr10	111630229	111630884
chr10	111672988	111673323
chr10	111717020	111717585
chr10	111726969	111727846
chr10	111758219	111758539
chr10	111925933	111926453
chr10	111958741	111959259
chr10	111971355	111971720
chr10	111975822	111976236
chr10	112053965	112054342
chr10	112085547	112086062
chr10	112103171	112103609
chr10	112142494	112142854
chr10	112247252	112247572
chr10	112250680	112251323
chr10	112278123	112278507
chr10	112279319	112279828
chr10	112283856	112284275
chr10	112286164	112286620
chr10	112317361	112317762
chr10	112384493	112384879
chr10	112393645	112394038
chr10	112421523	112422629
chr10	112621563	112623087
chr10	112669259	112669664
chr10	112826057	112826438
chr10	113830448	113830786
chr10	113831968	113832826
chr10	113933028	113933550
chr10	114139537	114139992
chr10	114196391	114196606
chr10	114525768	114526494
chr10	114542612	114543303
chr10	114575678	114576128
chr10	114701609	114701968
chr10	114705159	114705757
chr10	114808056	114808440
chr10	115023630	115023944
chr10	115134813	115135134
chr10	115204167	115204555
chr10	115276354	115276871
chr10	115300400	115300806
chr10	115307705	115308103
chr10	115313058	115313446
chr10	115322623	115323254
chr10	115429493	115430397
chr10	115458702	115459155
chr10	115597500	115597796
chr10	115601332	115601747
chr10	115604168	115604923
chr10	115736153	115736502
chr10	115774825	115775188
chr10	115793852	115794381
chr10	115923453	115924008
chr10	116054247	116055248
chr10	116264878	116265904
chr10	116276166	116276719
chr10	116300625	116300998
chr10	116381183	116382227
chr10	116383144	116383648
chr10	116431492	116431883
chr10	116433086	116433820
chr10	116517188	116517960
chr10	116572095	116572707
chr10	116626687	116627037
chr10	116629456	116629858
chr10	116687886	116688723
chr10	116751108	116751681
chr10	116843115	116843522
chr10	118021885	118022500
chr10	118358726	118359315
chr10	118491900	118492148
chr10	118537340	118537784
chr10	118598978	118599351
chr10	118642866	118643358
chr10	118724048	118724485
chr10	118754009	118754455
chr10	118819954	118820272
chr10	118820993	118821441
chr10	118887645	118888126
chr10	118911607	118914120
chr10	118915443	118915786
chr10	118924511	118924894
chr10	118933729	118934162
chr10	118966276	118966869
chr10	119120285	119121668
chr10	119123046	119124514
chr10	119286940	119287335
chr10	119292982	119293299
chr10	119512197	119513057
chr10	119685450	119685863
chr10	119795464	119795875
chr10	119865986	119866373
chr10	120019078	120019421
chr10	120021900	120022240
chr10	120091087	120091768
chr10	120503383	120504021
chr10	120780137	120780529
chr10	120830476	120830908
chr10	120850941	120851549
chr10	120854112	120854421
chr10	120914537	120914932
chr10	120924587	120925047
chr10	120928056	120928389
chr10	120957096	120958098
chr10	120961064	120961412
chr10	120999902	121000309
chr10	121034908	121035770
chr10	121071074	121071467
chr10	121084175	121084324
chr10	121093698	121094449
chr10	121228896	121229224
chr10	121239171	121239512
chr10	121292537	121292897
chr10	121345636	121345979
chr10	121358230	121358586
chr10	121368090	121368517
chr10	121369543	121370013
chr10	121401130	121401476
chr10	121426207	121426922
chr10	121475006	121475401
chr10	121619583	121619689
chr10	121621470	121622020
chr10	121642112	121642977
chr10	121755043	121755425
chr10	121877290	121878134
chr10	122206150	122206348
chr10	122600768	122601390
chr10	122692129	122692503
chr10	122698502	122698862
chr10	122728847	122729398
chr10	122839606	122840106
chr10	123348049	123348441
chr10	123432004	123432482
chr10	123677650	123678013
chr10	123723630	123724327
chr10	124124728	124125170
chr10	124628465	124629180
chr10	124703008	124703665
chr10	124729849	124730218
chr10	124757270	124758312
chr10	124882181	124882661
chr10	124885288	124885703
chr10	124889524	124890171
chr10	124899153	124899841
chr10	124904493	124904841
chr10	126019215	126019737
chr10	126033017	126033591
chr10	126067916	126068292
chr10	126096650	126097593
chr10	126128690	126129135
chr10	126140707	126140988
chr10	126199389	126199880
chr10	126392561	126392777
chr10	126421815	126421976
chr10	126470092	126470468
chr10	126480446	126481209
chr10	126594974	126595347
chr10	126667926	126668422
chr10	126702177	126703018
chr10	126837260	126837669
chr10	126839236	126839812
chr10	127397722	127398109
chr10	127502057	127502386
chr10	127564515	127565096
chr10	127570506	127570938
chr10	127574770	127575158
chr10	127795589	127796222
chr10	127813876	127814429
chr10	127814832	127815205
chr10	127835067	127835504
chr10	128583021	128583925
chr10	129100719	129101535
chr10	129814226	129814697
chr10	129838369	129838841
chr10	129898534	129898996
chr10	129900282	129900714
chr10	129963045	129963781
chr10	130025814	130026743
chr10	130226290	130226704
chr10	130229550	130229848
chr10	130262997	130263347
chr10	130315943	130316390
chr10	130320202	130320686
chr10	130382870	130383281
chr10	130468988	130469394
chr10	130585396	130585807
chr10	130616606	130617326
chr10	130618503	130619396
chr10	130668974	130670126
chr10	130718415	130718798
chr10	130722258	130722535
chr10	130723563	130724137
chr10	130727354	130728167
chr10	130730983	130731422
chr10	130767510	130768182
chr10	130784759	130785410
chr10	130789957	130790420
chr10	130854530	130854922
chr10	130856594	130857084
chr10	130895479	130896367
chr10	130984528	130984967
chr10	130994348	130994924
chr10	131011667	131012079
chr10	131155377	131155947
chr10	131185278	131185730
chr10	131347941	131348335
chr10	131391017	131391342
chr10	131395670	131396621
chr10	131480816	131481547
chr10	131582045	131582452
chr10	131601714	131602156
chr10	131635089	131635470
chr10	131636449	131636924
chr10	131639583	131640150
chr10	131641475	131642465
chr10	131642696	131643089
chr10	131650983	131651529
chr10	131658612	131659465
chr10	131798442	131798644
chr10	131815645	131816409
chr10	131825134	131825508
chr10	131878518	131879025
chr10	131950742	131951196
chr10	132237064	132237437
chr10	132241164	132241561
chr10	132294124	132294642
chr10	132377588	132378014
chr10	132393305	132393745
chr10	132445545	132446080
chr10	132448779	132449801
chr10	132469021	132469433
chr10	132478382	132479036
chr10	132738431	132739246
chr10	132834709	132835065
chr10	132875555	132876809
chr10	132999070	132999503
chr10	133011884	133012230
chr10	133107366	133107897
chr10	133244827	133245520
chr10	133336066	133336450
chr10	133408778	133409167
chr10	133435662	133436234
chr10	133584584	133585378
chr10	133595445	133595885
chr10	133636465	133637382
chr10	133638864	133639422
chr10	133640795	133641417
chr10	133644771	133645554
chr10	133687002	133687399
chr10	133699501	133700122
chr10	133708305	133708793
chr10	133729394	133730193
chr10	133850884	133852057
chr10	133911823	133912708
chr10	133971580	133972027
chr10	133983345	133984140
chr10	133994847	133995517
chr10	133999634	134000037
chr10	134027635	134027972
chr10	134061102	134061441
chr10	134074502	134075262
chr10	134107599	134108305
chr10	134116690	134117275
chr10	134200430	134200831
chr10	134201470	134202168
chr10	134252011	134252419
chr10	134345446	134346334
chr10	134352219	134353206
chr10	134625939	134626362
chr10	134628880	134629718
chr10	134657854	134658380
chr10	134708926	134709723
chr10	134751509	134751904
chr10	134752519	134753648
chr10	134756304	134756602
chr10	134921089	134921712
chr10	134924840	134925190
chr10	134971274	134971946
chr10	134981868	134982489
chr10	134987550	134988116
chr10	134988847	134989235
chr10	134993359	134993808
chr10	135020162	135021042
chr10	135036545	135036940
chr10	135041858	135042573
chr10	135057591	135057964
chr10	135183808	135184205
chr11	197963	198378
chr11	226908	227603
chr11	277735	279126
chr11	303962	304434
chr11	309181	309279
chr11	309570	309671
chr11	310486	310614
chr11	346132	346509
chr11	360030	360464
chr11	396533	397321
chr11	439858	440258
chr11	459331	460005
chr11	497009	497325
chr11	508504	508786
chr11	508873	509159
chr11	524786	525238
chr11	545142	545573
chr11	550883	552391
chr11	557741	558550
chr11	559018	559474
chr11	566845	567234
chr11	605228	605724
chr11	617876	618934
chr11	629641	629978
chr11	685749	686081
chr11	738007	738456
chr11	739945	740336
chr11	766497	766984
chr11	787785	788099
chr11	794434	795260
chr11	799608	799929
chr11	809522	809987
chr11	816778	817338
chr11	819677	820041
chr11	823546	823922
chr11	832056	832292
chr11	840520	840838
chr11	849464	849897
chr11	881014	882067
chr11	887361	887749
chr11	900016	900854
chr11	916250	916577
chr11	923541	923987
chr11	1037386	1037790
chr11	1240205	1240590
chr11	1276638	1277439
chr11	1287545	1287944
chr11	1313855	1314187
chr11	1360871	1361240
chr11	1366730	1367435
chr11	1368509	1369271
chr11	1548492	1549850
chr11	1671113	1672070
chr11	1741444	1741830
chr11	1925552	1925910
chr11	2355930	2356404
chr11	2378544	2379385
chr11	2676848	2677326
chr11	2681554	2681743
chr11	2863210	2863708
chr11	2869986	2870393
chr11	2880083	2880310
chr11	2969231	2969668
chr11	3033945	3035306
chr11	3142201	3142781
chr11	3194360	3194758
chr11	3356664	3357045
chr11	3400319	3400695
chr11	3774692	3775497
chr11	3785812	3786369
chr11	3818779	3819871
chr11	3832860	3833380
chr11	4072569	4072872
chr11	4153801	4154182
chr11	4165218	4165597
chr11	4371286	4371609
chr11	4585584	4586106
chr11	5574331	5574745
chr11	5662379	5662963
chr11	5667481	5667878
chr11	6211955	6212346
chr11	6367605	6368149
chr11	6395976	6396946
chr11	6451167	6451800
chr11	6459580	6459828
chr11	6554567	6555290
chr11	6582003	6582361
chr11	6590093	6590568
chr11	6596782	6597299
chr11	6624804	6625480
chr11	6632801	6633302
chr11	6660779	6661197
chr11	6997790	6998251
chr11	7491480	7492210
chr11	7491946	7492070
chr11	7554862	7555272
chr11	7965792	7966142
chr11	8059844	8060239
chr11	8308124	8308524
chr11	8649809	8650579
chr11	8660808	8661365
chr11	8666790	8667177
chr11	8848535	8849049
chr11	8889249	8889933
chr11	8942666	8943145
chr11	8981716	8982161
chr11	9025127	9025894
chr11	9117832	9118236
chr11	9242637	9242978
chr11	9292464	9292876
chr11	9341977	9343092
chr11	9363031	9363803
chr11	9438209	9438692
chr11	9553042	9553450
chr11	9591267	9592050
chr11	9642633	9643251
chr11	9726365	9726830
chr11	9736438	9736941
chr11	10272312	10272796
chr11	10283714	10284595
chr11	10344707	10345006
chr11	10434156	10434737
chr11	10519017	10519405
chr11	10535414	10535846
chr11	10583796	10584638
chr11	10705567	10706197
chr11	10707251	10707603
chr11	10713552	10713918
chr11	10729311	10730016
chr11	10786232	10786775
chr11	10835372	10835903
chr11	10878035	10878423
chr11	10889448	10890154
chr11	10909538	10909955
chr11	10911996	10912582
chr11	11599820	11600258
chr11	11819670	11820083
chr11	12044764	12045126
chr11	12045234	12045675
chr11	12297463	12298206
chr11	12356226	12356628
chr11	12411931	12412491
chr11	12420023	12420523
chr11	12577219	12578040
chr11	12651899	12652292
chr11	12658666	12659261
chr11	12672006	12672397
chr11	12702113	12702533
chr11	12806099	12806583
chr11	12819332	12819725
chr11	12821097	12821552
chr11	12841231	12841673
chr11	13256253	13256640
chr11	13440415	13441457
chr11	13647100	13648082
chr11	14303037	14303891
chr11	14335701	14336803
chr11	14359042	14359666
chr11	14400449	14400943
chr11	14477715	14478058
chr11	14497697	14498631
chr11	14622775	14622964
chr11	14869535	14869881
chr11	14885550	14886088
chr11	14912561	14913153
chr11	14949775	14950347
chr11	14951537	14951985
chr11	15051676	15052017
chr11	15079236	15080000
chr11	15092605	15093011
chr11	15277478	15277870
chr11	15279037	15279785
chr11	15285273	15286052
chr11	15485483	15485844
chr11	15581295	15581668
chr11	15619326	15619752
chr11	15628355	15628762
chr11	15821354	15821717
chr11	15871342	15871950
chr11	16064409	16064894
chr11	16333886	16334528
chr11	16351259	16351648
chr11	16583851	16584038
chr11	16590742	16591159
chr11	16716898	16717014
chr11	16755114	16755427
chr11	16798451	16799291
chr11	16875147	16875657
chr11	16883931	16884296
chr11	16887474	16887925
chr11	16902956	16903373
chr11	16992074	16992629
chr11	17055200	17055873
chr11	17185600	17186170
chr11	17254769	17255129
chr11	17330411	17330943
chr11	17367515	17367892
chr11	17990239	17991255
chr11	18083900	18084284
chr11	18300324	18300658
chr11	18325073	18325432
chr11	18343866	18344286
chr11	18361233	18361936
chr11	18373430	18374111
chr11	18504834	18505086
chr11	18566595	18566906
chr11	18612205	18612597
chr11	18676511	18676840
chr11	18683952	18684354
chr11	18699996	18700465
chr11	18769583	18769979
chr11	18799687	18800178
chr11	19049391	19050211
chr11	19095657	19096043
chr11	19096882	19097483
chr11	19218415	19218875
chr11	19555252	19555690
chr11	19556120	19556362
chr11	19690415	19690935
chr11	20109727	20110852
chr11	20365287	20365652
chr11	20588081	20588714
chr11	20647660	20647966
chr11	21891229	21891734
chr11	22171062	22172445
chr11	22410872	22411204
chr11	22602671	22604069
chr11	22644689	22645884
chr11	22807450	22808080
chr11	23939710	23940550
chr11	26262817	26263179
chr11	27180233	27180660
chr11	27196380	27196884
chr11	27340740	27341294
chr11	27449745	27450201
chr11	27484308	27484813
chr11	27676948	27677312
chr11	27679386	27679767
chr11	27696191	27697008
chr11	28085811	28086381
chr11	30301117	30301606
chr11	30400198	30400599
chr11	30563590	30564260
chr11	30718916	30719447
chr11	31347925	31348448
chr11	31487844	31488419
chr11	31787875	31788415
chr11	31791811	31792217
chr11	31795214	31795907
chr11	32069765	32070395
chr11	32150110	32150441
chr11	32151190	32151623
chr11	32311148	32312102
chr11	32561854	32562238
chr11	32871224	32872340
chr11	32993880	32994180
chr11	33017378	33017921
chr11	33139232	33139498
chr11	33236314	33236678
chr11	33353787	33354192
chr11	33670032	33670379
chr11	33673417	33673937
chr11	33678629	33679009
chr11	33713857	33714640
chr11	33752127	33752574
chr11	33846664	33847349
chr11	33908137	33908599
chr11	33967489	33967848
chr11	34022677	34023635
chr11	34027432	34027821
chr11	34031152	34031900
chr11	34034752	34035788
chr11	34035702	34036455
chr11	34040127	34040494
chr11	34041953	34042355
chr11	34083616	34084062
chr11	34245095	34245777
chr11	34287128	34287806
chr11	34288376	34288984
chr11	34334708	34335314
chr11	34373657	34374250
chr11	34404276	34404639
chr11	34417004	34417886
chr11	34894659	34895446
chr11	35597218	35598499
chr11	35640888	35642068
chr11	35905726	35906396
chr11	35921766	35922165
chr11	36140487	36140865
chr11	36174649	36174927
chr11	36267258	36267618
chr11	36350225	36350517
chr11	36350667	36350980
chr11	36351424	36351876
chr11	36354873	36355561
chr11	36488103	36488436
chr11	36542704	36543163
chr11	36572737	36573281
chr11	37256751	37257111
chr11	37257387	37257971
chr11	37538591	37538987
chr11	38379730	38380534
chr11	39437114	39437716
chr11	40271905	40272377
chr11	40307287	40307728
chr11	41437729	41438361
chr11	43247333	43247789
chr11	43290183	43290389
chr11	43337003	43337361
chr11	43534385	43534871
chr11	43553272	43553742
chr11	43557739	43558106
chr11	43622265	43622662
chr11	43658807	43659282
chr11	43714213	43714786
chr11	43858868	43859526
chr11	43921127	43921436
chr11	44044290	44044740
chr11	44074026	44074636
chr11	44170076	44170574
chr11	44287287	44287883
chr11	44294689	44294815
chr11	44340024	44340435
chr11	44434968	44435196
chr11	44516303	44516770
chr11	44543618	44544351
chr11	44601101	44601613
chr11	44705846	44706192
chr11	44738992	44739526
chr11	44755415	44755801
chr11	44889593	44890232
chr11	44928318	44928753
chr11	44934890	44935250
chr11	44955480	44956158
chr11	45125357	45125957
chr11	45271590	45272031
chr11	45310652	45311173
chr11	45318348	45318711
chr11	45333509	45334198
chr11	45640712	45641076
chr11	45642681	45643336
chr11	45722053	45722485
chr11	45722990	45723472
chr11	45749496	45750630
chr11	45783222	45783787
chr11	45825903	45826282
chr11	45830469	45830833
chr11	45863646	45864125
chr11	45877759	45878260
chr11	45895442	45896012
chr11	45901290	45902016
chr11	45971667	45972262
chr11	46083110	46083831
chr11	46094181	46095016
chr11	46095284	46095682
chr11	46097560	46097958
chr11	46217056	46217431
chr11	46221161	46221565
chr11	46255620	46256114
chr11	46257710	46258410
chr11	46268329	46268925
chr11	46273863	46274416
chr11	46308809	46309503
chr11	46311421	46311807
chr11	46316830	46317478
chr11	46320184	46320942
chr11	46325853	46326253
chr11	46339287	46339699
chr11	46359782	46360432
chr11	46367702	46368398
chr11	46370854	46371213
chr11	46539092	46539453
chr11	46571866	46572236
chr11	46595777	46596108
chr11	46679108	46679451
chr11	46823543	46824057
chr11	46890744	46891132
chr11	46892469	46892805
chr11	46895646	46896653
chr11	46914782	46915259
chr11	47154170	47154908
chr11	47163554	47164265
chr11	47193031	47194052
chr11	47226963	47227311
chr11	47248737	47249210
chr11	47333805	47334175
chr11	47378023	47378411
chr11	47386700	47387202
chr11	47404082	47404351
chr11	47502681	47503068
chr11	47530229	47531253
chr11	47544037	47544177
chr11	47556821	47557158
chr11	47620341	47620773
chr11	47692807	47693580
chr11	47744767	47745083
chr11	47825866	47826513
chr11	47867686	47868267
chr11	47928719	47929173
chr11	47959183	47960603
chr11	47996301	47996638
chr11	48002823	48003139
chr11	48008351	48008685
chr11	48071833	48072229
chr11	48087609	48088187
chr11	48149038	48149560
chr11	48169809	48169923
chr11	48321729	48322145
chr11	49186059	49186444
chr11	54946393	54947103
chr11	55510248	55510637
chr11	55608441	55608801
chr11	55611697	55612394
chr11	56737679	56737985
chr11	56772609	56773127
chr11	56802024	56802394
chr11	56847797	56848572
chr11	56858973	56859659
chr11	56867611	56868041
chr11	56950746	56951145
chr11	56984417	56984780
chr11	56997567	56999125
chr11	57006854	57007247
chr11	57038936	57039559
chr11	57052554	57053188
chr11	57054517	57054730
chr11	57092023	57092428
chr11	57122119	57122731
chr11	57162874	57163297
chr11	57173387	57173808
chr11	57181732	57182010
chr11	57192257	57192529
chr11	57236555	57237097
chr11	57265895	57266252
chr11	57285806	57286201
chr11	57302553	57302966
chr11	57441386	57441720
chr11	58048184	58048460
chr11	58102474	58103046
chr11	58177627	58179324
chr11	58252141	58252664
chr11	58312377	58312735
chr11	58428915	58429555
chr11	58630819	58631100
chr11	58660186	58660486
chr11	58666855	58667237
chr11	58695640	58696126
chr11	58721800	58722547
chr11	58730470	58731112
chr11	58950383	58950867
chr11	58962053	58962411
chr11	59061417	59061804
chr11	59073866	59074785
chr11	59081287	59081654
chr11	59084739	59084916
chr11	59089870	59090451
chr11	59138949	59139535
chr11	59192561	59192980
chr11	59279074	59279420
chr11	59280798	59281147
chr11	59334480	59334928
chr11	60223663	60223898
chr11	60291542	60291949
chr11	60299561	60300059
chr11	60366004	60366717
chr11	60429958	60430237
chr11	60438180	60438537
chr11	60449067	60449656
chr11	60644942	60645275
chr11	60653975	60654307
chr11	60684828	60685315
chr11	60818556	60818945
chr11	60857230	60857679
chr11	60885953	60886215
chr11	60916610	60917009
chr11	60954269	60954674
chr11	60970092	60970837
chr11	61029889	61030373
chr11	61032922	61033446
chr11	61040501	61040895
chr11	61105305	61105692
chr11	61111807	61112779
chr11	61204574	61205077
chr11	61242829	61243046
chr11	61276622	61277014
chr11	61316314	61316657
chr11	61339763	61340326
chr11	61352281	61352734
chr11	61377378	61378337
chr11	61395317	61395671
chr11	61414747	61415503
chr11	61441670	61442119
chr11	61446714	61447255
chr11	61471532	61471935
chr11	61473752	61474328
chr11	61487635	61488774
chr11	61490552	61491331
chr11	61495334	61496750
chr11	61502912	61503276
chr11	61549138	61550217
chr11	61605668	61606626
chr11	61636359	61636755
chr11	61647977	61648390
chr11	61834799	61835696
chr11	61861790	61862293
chr11	61864109	61864508
chr11	61918929	61919744
chr11	61943500	61943740
chr11	61968306	61968804
chr11	61976181	61976849
chr11	62069075	62069762
chr11	62077073	62077301
chr11	62097310	62097652
chr11	62115254	62115669
chr11	62124322	62125521
chr11	62135746	62136587
chr11	62145448	62145938
chr11	62169917	62170323
chr11	62176699	62177253
chr11	62189902	62190334
chr11	62195647	62196486
chr11	62202602	62203213
chr11	62229865	62230295
chr11	62233699	62234134
chr11	62250280	62250987
chr11	62277923	62278296
chr11	62285697	62286237
chr11	62295340	62296307
chr11	62311521	62312047
chr11	62315482	62316167
chr11	62328874	62329260
chr11	62355824	62356205
chr11	62362965	62363356
chr11	62366055	62366588
chr11	62380083	62380556
chr11	62383478	62383808
chr11	62386069	62386724
chr11	62404847	62405539
chr11	62445179	62446046
chr11	62447202	62448614
chr11	62483080	62483843
chr11	62547760	62548347
chr11	62667348	62667769
chr11	62669331	62669710
chr11	63015161	63015612
chr11	63060680	63061535
chr11	63084728	63085330
chr11	63097769	63098263
chr11	63098573	63098736
chr11	63137873	63138602
chr11	63195204	63195870
chr11	63205943	63206331
chr11	63210420	63210785
chr11	63291305	63292388
chr11	63337553	63337939
chr11	63363330	63364420
chr11	63386926	63387305
chr11	63440500	63441066
chr11	63462989	63463341
chr11	63498730	63499309
chr11	63510438	63510795
chr11	63559361	63559787
chr11	63559962	63561005
chr11	63565305	63565688
chr11	63592136	63592548
chr11	63594357	63594792
chr11	63601905	63602409
chr11	63614795	63615807
chr11	63619326	63619616
chr11	63647007	63647473
chr11	63654940	63655584
chr11	63671894	63672704
chr11	63690486	63690869
chr11	63705376	63706066
chr11	63710684	63711088
chr11	63731069	63731749
chr11	63749720	63750294
chr11	63754519	63755019
chr11	63757953	63758587
chr11	63765100	63765465
chr11	63770002	63770724
chr11	63775538	63776320
chr11	63794172	63794558
chr11	63808411	63808746
chr11	63815953	63816416
chr11	63825209	63825562
chr11	63828791	63829175
chr11	63842127	63842592
chr11	63866732	63867071
chr11	63879291	63879897
chr11	63883172	63883644
chr11	63897126	63897576
chr11	63920091	63920591
chr11	63934343	63935106
chr11	63973023	63973413
chr11	64090426	64091345
chr11	64153019	64153503
chr11	64167390	64167644
chr11	64167904	64168213
chr11	64185777	64186130
chr11	64212624	64213006
chr11	64247290	64247811
chr11	64268386	64268798
chr11	64301462	64301863
chr11	64326557	64326960
chr11	64334133	64334495
chr11	64368894	64369250
chr11	64402195	64402749
chr11	64441023	64441144
chr11	64448180	64448647
chr11	64495794	64496211
chr11	64537706	64538122
chr11	64540127	64540854
chr11	64551445	64551830
chr11	64564899	64565257
chr11	64607833	64608185
chr11	64620576	64620844
[truncated: 29,749 more rows]

## Sheet: EWS502 H3K27me3 peaks
chr10	85301	85400
chr10	116201	120450
chr10	517951	518100
chr10	995201	995300
chr10	1138851	1138950
chr10	1203501	1203600
chr10	1514951	1515050
chr10	1647551	1647650
chr10	1697001	1697100
chr10	1823401	1823500
chr10	1879701	1879800
chr10	2243651	2243900
chr10	2259951	2260050
chr10	2713001	2713150
chr10	2764151	2764250
chr10	2795451	2809250
chr10	2982801	2987000
chr10	2994001	2996100
chr10	3005051	3005150
chr10	3013001	3013100
chr10	3041401	3041550
chr10	3054451	3056250
chr10	3096051	3099100
chr10	3256001	3256100
chr10	3261451	3265600
chr10	3290201	3293650
chr10	3303101	3303200
chr10	3312951	3313050
chr10	3328901	3329150
chr10	3337401	3341250
chr10	3378201	3379500
chr10	3408251	3411500
chr10	3422901	3429250
chr10	3441501	3446850
chr10	3469051	3469150
chr10	3483751	3483850
chr10	3508551	3513050
chr10	3520251	3590150
chr10	3595551	3634800
chr10	3648451	3739100
chr10	3748501	3766800
chr10	3777751	3779100
chr10	3788951	3798400
chr10	3888101	3891100
chr10	3901901	3902050
chr10	3911501	3914400
chr10	3925051	3925200
chr10	3931201	3947150
chr10	3953751	4067500
chr10	4075151	4075300
chr10	4082101	4123350
chr10	4128751	4131000
chr10	4137701	4138850
chr10	4144751	4144850
chr10	4150251	4154900
chr10	4161301	4164750
chr10	4174101	4174200
chr10	4181351	4186150
chr10	4194851	4228500
chr10	4234051	4250100
chr10	4263751	4263950
chr10	4270501	4270650
chr10	4276651	4276800
chr10	4282251	4282400
chr10	4290151	4321500
chr10	4335201	4337100
chr10	4351701	4358600
chr10	4370201	4370300
chr10	4376201	4376900
chr10	4382951	4387050
chr10	4394951	4395100
chr10	4409301	4409450
chr10	4417851	4429400
chr10	4438701	4438850
chr10	4461851	4467900
chr10	4473201	4473350
chr10	4483151	4491300
chr10	4502151	4521350
chr10	4536801	4555150
chr10	4561601	4573950
chr10	4581701	4594000
chr10	4599301	4606200
chr10	4615301	4615600
chr10	4622901	4623050
chr10	4634551	4640100
chr10	4651951	4652350
chr10	4663051	4672300
chr10	4684351	4684500
chr10	4832001	4832100
chr10	4908751	4908850
chr10	5014201	5017750
chr10	5034401	5034500
chr10	5042801	5058450
chr10	5066501	5078550
chr10	5090851	5093550
chr10	5122651	5122800
chr10	5130501	5130650
chr10	5148851	5148950
chr10	5154451	5155550
chr10	5180001	5180100
chr10	5189701	5193450
chr10	5228751	5231700
chr10	5266151	5266700
chr10	5274401	5276300
chr10	5284201	5295100
chr10	5309051	5309150
chr10	5340901	5387650
chr10	5394301	5415200
chr10	5517601	5518300
chr10	5524801	5541300
chr10	5553851	5570800
chr10	5621851	5621950
chr10	5677401	5677500
chr10	6035551	6035650
chr10	6040901	6070750
chr10	6078751	6088150
chr10	6097401	6110800
chr10	6117051	6165450
chr10	6494701	6530450
chr10	6537001	6537100
chr10	6544051	6584500
chr10	6589801	6628400
chr10	6637751	6676750
chr10	6682451	6689450
chr10	6699851	6709950
chr10	6718451	6738400
chr10	6745851	6762850
chr10	6768751	6777150
chr10	6783501	6795400
chr10	6802451	6823950
chr10	6833701	6878500
chr10	6885451	6885550
chr10	6900601	6904600
chr10	6922101	6922200
chr10	6950151	6961000
chr10	6968151	6973700
chr10	6991801	7002950
chr10	7009751	7010200
chr10	7023151	7024700
chr10	7037401	7037500
chr10	7043351	7046200
chr10	7052701	7069900
chr10	7081051	7084950
chr10	7117551	7126250
chr10	7146251	7168500
chr10	7174151	7189300
chr10	7195701	7204400
chr10	7212551	7215200
chr10	7226651	7231650
chr10	7240101	7262900
chr10	7268801	7285750
chr10	7292401	7302650
chr10	7310501	7310600
chr10	7315701	7315950
chr10	7325251	7361500
chr10	7368751	7373200
chr10	7379751	7398800
chr10	7406401	7438100
chr10	7444151	7455850
chr10	7461151	7507650
chr10	7513351	7527100
chr10	7535451	7567200
chr10	7572501	7588500
chr10	7594501	7605950
chr10	7613151	7759000
chr10	7768451	7768650
chr10	7778101	7816200
chr10	7822701	7827000
chr10	7896651	7896800
chr10	7978451	7978550
chr10	8108401	8134550
chr10	8161601	8167950
chr10	8173001	8244800
chr10	8252651	8271800
chr10	8281101	8290950
chr10	8296801	8324100
chr10	8334951	8347600
chr10	8360051	8369350
chr10	8377001	8398150
chr10	8407951	8434200
chr10	8445651	8446250
chr10	8451451	8456600
chr10	8463251	8528200
chr10	8642001	8642100
chr10	8648101	8648250
chr10	8655251	8655400
chr10	8661201	8685850
chr10	8696951	8704750
chr10	8717351	8718700
chr10	8746901	8747000
chr10	8806151	8806300
chr10	8813001	8821800
chr10	8828851	8834650
chr10	8848101	8848250
chr10	8860951	8861100
chr10	8887551	8887650
chr10	8922351	8922500
chr10	8934651	8934800
chr10	8942601	8942750
chr10	8975801	8975900
chr10	9057951	9059950
chr10	9075751	9077600
chr10	9086751	9086900
chr10	9093401	9093500
chr10	9098751	9099050
chr10	9115051	9115150
chr10	9121251	9121350
chr10	9140701	9144400
chr10	9191901	9192000
chr10	9232401	9233250
chr10	9264351	9264450
chr10	9280001	9280100
chr10	9296051	9298150
chr10	9307101	9314500
chr10	9321301	9326100
chr10	9338201	9339250
chr10	9357251	9357350
chr10	9367801	9370150
chr10	9396401	9396500
chr10	9405101	9416650
chr10	9444751	9444850
chr10	9461251	9461800
chr10	9497751	9497850
chr10	9584401	9584500
chr10	9613251	9613350
chr10	9749001	9749100
chr10	9781401	9781500
chr10	9837101	9838000
chr10	9869001	9869150
chr10	9894751	9894850
chr10	9901651	9901800
chr10	9911101	9911250
chr10	10003401	10004250
chr10	10090151	10090250
chr10	10222951	10223050
chr10	10303901	10304000
chr10	10323951	10324050
chr10	10375551	10377850
chr10	10389501	10389650
chr10	10415701	10415800
chr10	10426851	10426950
chr10	10432401	10432500
chr10	10445201	10450800
chr10	10483801	10484150
chr10	10504551	10504700
chr10	10562251	10562350
chr10	10601701	10604000
chr10	10610501	10610600
chr10	10619751	10620600
chr10	10626101	10633450
chr10	10665901	10666000
chr10	10701451	10704100
chr10	10709351	10709500
chr10	10716851	10717000
chr10	10729151	10729250
chr10	10744801	10744900
chr10	10767851	10768750
chr10	10779251	10779400
chr10	10788351	10788450
chr10	10801451	10801550
chr10	10808001	10812800
chr10	10829351	10834200
chr10	10847101	10848600
chr10	10855701	10859900
chr10	10879601	10881150
chr10	10896551	10900350
chr10	10911701	10913500
chr10	10919651	10919750
chr10	10928301	10935850
chr10	10952401	10965600
chr10	10972251	10973650
chr10	10988301	11008700
chr10	11030201	11039600
chr10	11048701	11048800
chr10	11062301	11062450
chr10	11073351	11100200
chr10	11107901	11110300
chr10	11116601	11132800
chr10	11138801	11159300
chr10	11165851	11171550
chr10	11177201	11202950
chr10	11213201	11265200
chr10	11273201	11389000
chr10	11395901	11430900
chr10	11436901	11497250
chr10	11506301	11535050
chr10	11761901	11778950
chr10	11784651	11812050
chr10	11826151	11826250
chr10	11842151	11842250
chr10	11854301	11854800
chr10	12518551	12518650
chr10	12819001	12819100
chr10	12931051	12931150
chr10	12937651	12937800
chr10	12953551	12961550
chr10	12981001	12981100
chr10	13005451	13005550
chr10	13020301	13020550
chr10	13031401	13032150
chr10	13048001	13048100
chr10	13057001	13057150
chr10	13081451	13084550
chr10	13090151	13090450
chr10	13109151	13111200
chr10	13117751	13124500
chr10	13154351	13154500
chr10	13180451	13182900
chr10	13303851	13320750
chr10	13345151	13345250
chr10	13426051	13439750
chr10	13457201	13476550
chr10	13489201	13489350
chr10	13502801	13507500
chr10	13512851	13522800
chr10	13587651	13587750
chr10	13617651	13628200
chr10	13638051	13649350
chr10	13662651	13662750
chr10	13754101	13754200
chr10	13768801	13768900
chr10	13809251	13814050
chr10	13941701	13941800
chr10	13973101	13976500
chr10	13983051	13983150
chr10	13995551	13998500
chr10	14024051	14029000
chr10	14042651	14042800
chr10	14053001	14057900
chr10	14067451	14073100
chr10	14083251	14098500
chr10	14104701	14118500
chr10	14129351	14129450
chr10	14144751	14152350
chr10	14158051	14174400
chr10	14180801	14186400
chr10	14194951	14309150
chr10	14316351	14329350
chr10	14335801	14361100
chr10	14377551	14416200
chr10	14421251	14510900
chr10	14518001	14523850
chr10	14529251	14588250
chr10	14727451	14727600
chr10	14758901	14763550
chr10	14772251	14774250
chr10	14781051	14781150
chr10	14796301	14801900
chr10	14807151	14813100
chr10	14818951	14823350
chr10	14830551	14836500
chr10	14851201	14856950
chr10	14864001	14869250
chr10	14883001	14885700
chr10	14892351	14892450
chr10	15062551	15062800
chr10	15074351	15074900
chr10	15081701	15085000
chr10	15094951	15095850
chr10	15129251	15129350
chr10	15151001	15156150
chr10	15172801	15175800
chr10	15267351	15267450
chr10	15319551	15319650
chr10	15372551	15372650
chr10	15489101	15489300
chr10	15502051	15502150
chr10	15516901	15517000
chr10	15522401	15619950
chr10	15628101	15644400
chr10	15649701	15655600
chr10	15670301	15670450
chr10	15675601	15682650
chr10	15691001	15701050
chr10	15708801	15709150
chr10	15715901	15723100
chr10	15734251	15735250
chr10	15743651	15743800
chr10	15752701	15772650
chr10	15777751	15778950
chr10	15789301	15810250
chr10	15817451	15841600
chr10	15849551	15849650
chr10	15947401	15952400
chr10	15964051	15970900
chr10	15978601	15984150
chr10	15993351	15994000
chr10	16023851	16023950
chr10	16049151	16049250
chr10	16055851	16056900
chr10	16067801	16068000
chr10	16091951	16096750
chr10	16112701	16112800
chr10	16121151	16123900
chr10	16137451	16137550
chr10	16153351	16158750
chr10	16196051	16196200
chr10	16238201	16238300
chr10	16266051	16266150
chr10	16272951	16279350
chr10	16292151	16296500
chr10	16313651	16315500
chr10	16339451	16341950
chr10	16352801	16366350
chr10	16374301	16379000
chr10	16390251	16390850
chr10	16398901	16399000
chr10	16405151	16414800
chr10	16423801	16426300
chr10	16431951	16452500
chr10	16460751	16479550
chr10	16485451	16488850
chr10	16495001	16496150
chr10	16504351	16511750
chr10	16601251	16610850
chr10	16620151	16635400
chr10	16648201	16649050
chr10	16659201	16659400
chr10	16665151	16668700
chr10	16923301	16923400
chr10	16942951	16954850
chr10	17333601	17333750
chr10	17340951	17341050
chr10	17349651	17355250
chr10	17366101	17376450
chr10	17388251	17390800
chr10	17403101	17403200
chr10	17410901	17411150
chr10	17430501	17432200
chr10	17450851	17450950
chr10	17460051	17460150
chr10	17470051	17478600
chr10	17485101	17486800
chr10	17494251	17538450
chr10	17546701	17547200
chr10	17560501	17561150
chr10	17571351	17571500
chr10	17584651	17584800
chr10	17633351	17633450
chr10	17674751	17674850
chr10	18269101	18269200
chr10	18286101	18287150
chr10	18353301	18353400
chr10	18385001	18385150
chr10	18395901	18404750
chr10	18419301	18419450
chr10	19335251	19335350
chr10	19381951	19382050
chr10	19645551	19645650
chr10	20562551	20562650
chr10	21204151	21204250
chr10	21397351	21401050
chr10	21406851	21408150
chr10	21501651	21502100
chr10	21644901	21645000
chr10	22356351	22356450
chr10	22432851	22432950
chr10	22439201	22440400
chr10	22464151	22468400
chr10	22476351	22476450
chr10	22481951	22482050
chr10	22493001	22493150
chr10	22574051	22574500
chr10	22580751	22580850
chr10	22587501	22592400
chr10	22600851	22601000
chr10	22608801	22608900
chr10	22614201	22627400
chr10	22650951	22651600
chr10	22664901	22665000
chr10	22800701	22805000
chr10	22819501	22837000
chr10	22842401	22846450
chr10	22891601	22897650
chr10	22921951	22933900
chr10	22941751	22942250
chr10	23044201	23057900
chr10	23090801	23095400
chr10	23108151	23109300
chr10	23124101	23135700
chr10	23178301	23182550
chr10	23193051	23198000
chr10	23223551	23224400
chr10	23256151	23257050
chr10	23321851	23321950
chr10	23329001	23331100
chr10	23338801	23340900
chr10	23364001	23365650
chr10	23376151	23399750
chr10	23460551	23460700
chr10	23473301	23473400
chr10	23492351	23493600
chr10	23500251	23540250
chr10	23550201	23550300
chr10	23577051	23577400
chr10	23591051	23595150
chr10	23607651	23607750
chr10	23653251	23653350
chr10	23659951	23660050
chr10	23692801	23692950
chr10	23908751	23908850
chr10	23944101	23944200
chr10	24022501	24025350
chr10	24069751	24079750
chr10	24097701	24097850
chr10	24150901	24161550
chr10	24204051	24210850
chr10	24220301	24220400
chr10	24231301	24244800
chr10	24280451	24280550
chr10	24287751	24287900
chr10	24309101	24309200
chr10	24385101	24385200
chr10	24523901	24524000
chr10	25122251	25122350
chr10	25365951	25369200
chr10	25375401	25375550
chr10	25385801	25385950
chr10	25429951	25445900
chr10	25454051	25460400
chr10	25466351	25472300
chr10	25477901	25489300
chr10	25495951	25496050
chr10	25503301	25506650
chr10	25511801	25514100
chr10	25525801	25526000
chr10	25536551	25536650
chr10	25573551	25573650
chr10	25599451	25600000
chr10	25878951	25879050
chr10	25974701	25974850
chr10	25989951	25990800
chr10	26001651	26020700
chr10	26216101	26267350
chr10	26294701	26294800
chr10	26303401	26303500
chr10	26310851	26311000
chr10	26328851	26333150
chr10	26345701	26345800
chr10	26352501	26352600
chr10	26366751	26366850
chr10	26374051	26384100
chr10	26396401	26396550
chr10	26414401	26421650
chr10	26441401	26446550
chr10	26462201	26462350
chr10	26471201	26471350
chr10	26485101	26486800
chr10	26492151	26493950
chr10	26501101	26513250
chr10	26523301	26528550
chr10	26538901	26587000
chr10	26593601	26613950
chr10	26620201	26625500
chr10	26631951	26647950
chr10	26656851	26657100
chr10	26664301	26664450
chr10	26669801	26669900
chr10	26678551	26678650
chr10	26685351	26689700
chr10	26702501	26713900
chr10	26720551	26722000
chr10	26728451	26734400
chr10	26744651	26744950
chr10	26755101	26778950
chr10	26784201	26786400
chr10	26794901	26799900
chr10	26807101	26807250
chr10	26815151	26823250
chr10	26829951	26835000
chr10	26845901	26847750
chr10	26854801	26863600
chr10	26882801	26889200
chr10	26895651	26897750
chr10	26911751	26915050
chr10	27977851	27980650
chr10	28072601	28075750
chr10	28332751	28338950
chr10	28368501	28368700
chr10	28492001	28492100
chr10	28577801	28577900
chr10	28635951	28637350
chr10	28716451	28716550
chr10	28818301	28818450
chr10	29034001	29034100
chr10	29177201	29177350
chr10	29182401	29183800
chr10	29203301	29204950
chr10	29276251	29276350
chr10	29410551	29410650
chr10	29429151	29429250
chr10	29475251	29475350
chr10	29492951	29493050
chr10	29509351	29509500
chr10	29590301	29590400
chr10	29802151	29802250
chr10	29885601	29885700
chr10	30063501	30066400
chr10	30161401	30161500
chr10	30207051	30207150
chr10	30215551	30215950
chr10	30245751	30250050
chr10	30375001	30375100
chr10	30439601	30439750
chr10	30527151	30530950
chr10	30619101	30619600
chr10	30683901	30684000
chr10	30752551	30752650
chr10	30759701	30763800
chr10	30791801	30791900
chr10	31014651	31014750
chr10	31041551	31041650
chr10	31079851	31079950
chr10	31103651	31108650
chr10	31125951	31126050
chr10	31150401	31150500
chr10	31158601	31158700
chr10	31907701	31907800
chr10	31917051	31917150
chr10	31971901	31980350
chr10	31987301	31988900
chr10	32053401	32053500
chr10	32060301	32061500
chr10	32440701	32440800
chr10	32494201	32494300
chr10	33385451	33387750
chr10	33406551	33406650
chr10	33418001	33422450
chr10	33430051	33436100
chr10	33450751	33540700
chr10	33553151	33554150
chr10	33567051	33570550
chr10	33576351	33576650
chr10	33585651	33585750
chr10	33661351	33666600
chr10	33722251	33723000
chr10	33733501	33733600
chr10	33808351	33808450
chr10	33814501	33814600
chr10	33850651	33850800
chr10	33877051	33892350
chr10	33899301	33915700
chr10	33920751	33925600
chr10	33943401	33947350
chr10	33953051	33961150
chr10	34130801	34130900
chr10	34308301	34310600
chr10	34339901	34340050
chr10	34376801	34380700
chr10	34394851	34395150
chr10	34416101	34416200
chr10	35100851	35108950
chr10	35114551	35122100
chr10	35145401	35145600
chr10	35153101	35153200
chr10	35185901	35186100
chr10	35228501	35228650
chr10	35350501	35350650
chr10	35831851	35831950
chr10	35976201	35976300
chr10	36355901	36356000
chr10	36611151	36611300
chr10	36838101	36838200
chr10	37271651	37273550
chr10	37315851	37317650
chr10	37323851	37324450
chr10	37339901	37340000
chr10	37388151	37388300
chr10	37406751	37406850
chr10	37573451	37577400
chr10	37594451	37594600
chr10	37629201	37634050
chr10	37639301	37641100
chr10	37653601	37653700
chr10	37678251	37678350
chr10	37709401	37709500
chr10	37746401	37746500
chr10	37759951	37760050
chr10	37766851	37766950
chr10	37777351	37777500
chr10	37789501	37794400
chr10	37855501	37855600
chr10	37880451	37882950
chr10	37951401	37951500
chr10	37964001	37964100
chr10	38008451	38017100
chr10	38029551	38032800
chr10	38039401	38039550
chr10	38070301	38070400
chr10	38104401	38105400
chr10	38114901	38115000
chr10	38232751	38232850
chr10	38241601	38242750
chr10	38262801	38262950
chr10	38320701	38320800
chr10	38935251	38935700
chr10	41964801	41964950
chr10	41992451	41993250
chr10	42058051	42058200
chr10	42466401	42467450
chr10	42530301	42530400
chr10	42546101	42546400
chr10	42554151	42554250
chr10	42564601	42574300
chr10	42583101	42591650
chr10	42652451	42652900
chr10	42660751	42664000
chr10	42674651	42699700
chr10	42710501	42714500
chr10	42743101	42756700
chr10	42767251	42771850
chr10	42786351	42818350
chr10	42837601	42843250
chr10	42864001	42864750
chr10	42871651	42921000
chr10	42926701	42934850
chr10	42940951	42944300
chr10	43010501	43054650
chr10	43064701	43090900
chr10	43096401	43103000
chr10	43108251	43143250
chr10	43148351	43156450
chr10	43165451	43167200
chr10	43179301	43180250
chr10	43322551	43322700
chr10	43396851	43396950
chr10	43411751	43411900
chr10	43417851	43417950
chr10	43486701	43486800
chr10	43494151	43494250
chr10	43527201	43530200
chr10	43544851	43545000
chr10	43553801	43553950
chr10	43562851	43574300
chr10	43590601	43595750
chr10	43607501	43607600
chr10	43614751	43619500
chr10	43657051	43657150
chr10	43710601	43712400
chr10	43737751	43746550
chr10	43774951	43788900
chr10	43799101	43801750
chr10	43811951	43831350
chr10	43840351	43845050
chr10	43855501	43883300
chr10	43938601	43938750
chr10	43948251	43949200
chr10	43959151	43959300
chr10	44002751	44002900
chr10	44010551	44015750
chr10	44058001	44058850
chr10	44125301	44125400
chr10	44170801	44170900
chr10	44199451	44201650
chr10	44232001	44234400
chr10	44239801	44243800
chr10	44251151	44251700
chr10	44288751	44288850
chr10	44321251	44324400
chr10	44334501	44334600
chr10	44352251	44352350
chr10	44366901	44367050
chr10	44374201	44377300
chr10	44522851	44522950
chr10	44709701	44709800
chr10	44719001	44719100
chr10	44747851	44747950
chr10	44841451	44850050
chr10	45042201	45042300
chr10	45064351	45064450
chr10	45079401	45079550
chr10	45108251	45109350
chr10	45118601	45124750
chr10	45149701	45149800
chr10	45168651	45170200
chr10	45188551	45203400
chr10	45218901	45232050
chr10	45237351	45244950
chr10	45250501	45255600
chr10	45260701	45260850
chr10	45374001	45374100
chr10	46387151	46434700
chr10	46440151	46470500
chr10	46478701	46482400
chr10	46494251	46528100
chr10	46540551	46558700
chr10	47057101	47058900
chr10	47067651	47081900
chr10	47089901	47095150
chr10	47124551	47156450
chr10	47168451	47172950
chr10	47932851	47933000
chr10	47938901	47957200
chr10	47972851	48013400
chr10	48018951	48087650
chr10	48094201	48121400
chr10	48129001	48134150
chr10	48161601	48165900
chr10	48173851	48174000
chr10	48194601	48200000
chr10	48207301	48207400
chr10	48212651	48223000
chr10	48242751	48244400
chr10	48249451	48251550
chr10	48258001	48273650
chr10	49060601	49075500
chr10	49084601	49089950
chr10	49097401	49103850
chr10	49115451	49118600
chr10	49125301	49135100
chr10	49149201	49151850
chr10	49162901	49166200
chr10	49177601	49179150
chr10	49320551	49359500
chr10	49366651	49389650
chr10	49396301	49406450
chr10	49412351	49437250
chr10	49442601	49489400
chr10	49498951	49507050
chr10	49513101	49513450
chr10	49526351	49542000
chr10	49549251	49549650
chr10	49562051	49564150
chr10	49570901	49585450
chr10	49594601	49614200
chr10	49621151	49621700
chr10	49637501	49645700
chr10	49651851	49660700
chr10	49667551	49677100
chr10	49687901	49690000
chr10	49696051	49701600
chr10	49712001	49731950
chr10	49747401	49760900
chr10	49767051	49768650
chr10	49776401	49776500
chr10	49784001	49792900
chr10	49801851	49851300
chr10	49858651	49866800
chr10	49888801	49888950
chr10	49953201	49953300
chr10	49959301	49959400
chr10	49967251	49967400
chr10	49988901	49999100
chr10	50006601	50010350
chr10	50015901	50057150
chr10	50062651	50069050
chr10	50083301	50108400
chr10	50115451	50121350
chr10	50133101	50142250
chr10	50147701	50211900
chr10	50231901	50232000
chr10	50238301	50297500
chr10	50306751	50307750
chr10	50417851	50419150
chr10	50436451	50450300
chr10	50471651	50501950
chr10	50587351	50587450
chr10	50601901	50602000
chr10	50611051	50640650
chr10	50645901	50648550
chr10	50655051	50655150
chr10	50660901	50665650
chr10	51195501	51195900
chr10	51214001	51219400
chr10	51455601	51457250
chr10	51462601	51462700
chr10	51491501	51491650
chr10	51685601	51688500
chr10	51701551	51711450
chr10	51717751	51717850
chr10	52052451	52052700
chr10	52064851	52065000
chr10	52084151	52084250
chr10	52224401	52224500
chr10	52239451	52239550
chr10	52246601	52248900
chr10	52254651	52255800
chr10	52263001	52272750
chr10	52294901	52297850
chr10	52319151	52319250
chr10	52338251	52338400
chr10	52384451	52384600
chr10	52405251	52405350
chr10	52415501	52423600
chr10	52432401	52438250
chr10	52451001	52451100
chr10	52476501	52478900
chr10	52502901	52505200
chr10	52536951	52537100
chr10	52570601	52570700
chr10	52592651	52592800
chr10	52629301	52632100
chr10	52719001	52719100
chr10	52734751	52734850
chr10	52749551	52750300
chr10	52866651	52866750
chr10	52919001	52919150
chr10	52929401	52929500
chr10	52944651	52944800
chr10	53035001	53035100
chr10	53046651	53046800
chr10	53071051	53071200
chr10	53255351	53255450
chr10	53287201	53287300
chr10	53301451	53301600
chr10	53325101	53325200
chr10	53363951	53364900
chr10	53380901	53381000
chr10	53402851	53402950
chr10	53435351	53435450
chr10	53493751	53496400
chr10	53503401	53503500
chr10	53525701	53525800
chr10	53550851	53550950
chr10	53573301	53573450
chr10	53599251	53599350
chr10	53637051	53637200
chr10	53661051	53662550
chr10	53738251	53748100
chr10	53812101	53812200
chr10	53859651	53859750
chr10	53884301	53884400
chr10	54150801	54150950
chr10	54168701	54174150
chr10	54181651	54182850
chr10	54189101	54191150
chr10	54201251	54216850
chr10	54235201	54235950
chr10	54294651	54295150
chr10	54301401	54301600
chr10	54310901	54320500
chr10	54331551	54331650
chr10	54338901	54339000
chr10	54365251	54371150
chr10	54376451	54385200
chr10	54507851	54508000
chr10	54518051	54520800
chr10	54536901	54537000
chr10	54554201	54554350
chr10	54635851	54640300
chr10	54652751	54652850
chr10	54832701	54833600
chr10	54916901	54919300
chr10	55023451	55029650
chr10	55096351	55097150
chr10	55120351	55120450
chr10	55128901	55132550
chr10	55138801	55138900
chr10	55156301	55157100
chr10	55202001	55202100
chr10	55236651	55239000
chr10	55253451	55253550
chr10	55261101	55265850
chr10	55288951	55289050
chr10	55439201	55440800
chr10	55551701	55551800
chr10	56343051	56343200
chr10	56561051	56561150
chr10	56693151	56693300
chr10	57055651	57062350
chr10	57353051	57353150
chr10	57396201	57396350
chr10	57581751	57581850
chr10	57643251	57643400
chr10	57753801	57756600
chr10	57838601	57838700
chr10	57895401	57895500
chr10	57943451	57943600
chr10	58015601	58016250
chr10	58034601	58035050
chr10	58056801	58056900
chr10	58076701	58076800
chr10	58233851	58233950
chr10	58242451	58242550
chr10	58364601	58364700
chr10	58392351	58393600
chr10	58444751	58445450
chr10	58668601	58668750
chr10	58694001	58694150
chr10	58717551	58717700
chr10	58736801	58736900
chr10	58766101	58766350
chr10	59085301	59085400
chr10	59136701	59136800
chr10	59167451	59167550
chr10	59246101	59246600
chr10	59350451	59350550
chr10	59398401	59398500
chr10	59439151	59439250
chr10	59469851	59470000
chr10	59492551	59504100
chr10	59510151	59510250
chr10	59524951	59525050
chr10	59535801	59536900
chr10	59592151	59596200
chr10	59756501	59760650
chr10	59866001	59866150
chr10	59882851	59883000
chr10	59941451	59943750
chr10	60150701	60150800
chr10	60213151	60213250
chr10	60270551	60285650
chr10	60303851	60304000
chr10	60318901	60319000
chr10	60334451	60335000
chr10	60380651	60383400
chr10	60445851	60446000
chr10	60518751	60518850
chr10	60605551	60607200
chr10	60792851	60792950
chr10	60922051	60922350
chr10	61062651	61063000
chr10	61139901	61142650
chr10	61193451	61194150
chr10	61419551	61419650
chr10	61436651	61439100
chr10	61453551	61455750
chr10	61838051	61838150
chr10	62164001	62164100
chr10	62276751	62276900
chr10	62286251	62286350
chr10	62430501	62431850
chr10	62459701	62459850
chr10	62471701	62484550
chr10	62679351	62679450
chr10	63758601	63758700
chr10	63801751	63806250
chr10	63942851	63943000
chr10	64094451	64098550
chr10	64150751	64163850
chr10	64243701	64254800
chr10	64297551	64297650
chr10	64309851	64316500
chr10	65258851	65258950
chr10	65294251	65296100
chr10	65358451	65358550
chr10	65415301	65416600
chr10	65423601	65426750
chr10	65464351	65467000
chr10	65490501	65493150
chr10	65502951	65503100
chr10	65516201	65524850
chr10	65533601	65533700
chr10	65544551	65544700
chr10	65568751	65568850
chr10	65590101	65590200
chr10	65627351	65627600
chr10	65716451	65720700
chr10	65744151	65744250
chr10	65765151	65765250
chr10	65781151	65781250
chr10	65827201	65827300
chr10	65874551	65874700
chr10	65946201	65946300
chr10	66096301	66096400
chr10	66326601	66326700
chr10	66514651	66514800
chr10	67398651	67398750
chr10	67488001	67488100
chr10	67674751	67674850
chr10	68088451	68088550
chr10	68267151	68267250
chr10	68281751	68281850
chr10	68291101	68291200
chr10	68303951	68307300
chr10	68343651	68343750
chr10	68355951	68359350
chr10	68394801	68394900
chr10	68759651	68759800
chr10	68917101	68917200
chr10	68925001	68925100
chr10	69049801	69057100
chr10	69106551	69106700
chr10	69153501	69154400
chr10	70298801	70301050
chr10	70469851	70469950
chr10	70491501	70496200
chr10	70695251	70696250
chr10	70711601	70712500
chr10	70725751	70725850
chr10	70828351	70828450
chr10	70845951	70846050
chr10	70906401	70906500
chr10	70953151	70958150
chr10	70965401	70965750
chr10	70982251	71019200
chr10	71027251	71034200
chr10	71046601	71051450
chr10	71057051	71059400
chr10	71085101	71113550
chr10	71119051	71119200
chr10	71127201	71131600
chr10	71136701	71146350
chr10	71155351	71155450
chr10	71171501	71174950
chr10	71199251	71216350
chr10	71222351	71235850
chr10	71242901	71267350
chr10	71277651	71277750
chr10	71288201	71291700
chr10	71302151	71302250
chr10	71311551	71318600
chr10	71368901	71369000
chr10	71409851	71409950
chr10	71672951	71673050
chr10	71697351	71697450
chr10	71779651	71779750
chr10	71826251	71826350
chr10	71864901	71877850
chr10	71897701	71897800
chr10	71902901	71909300
chr10	72068151	72068250
chr10	72076201	72076300
chr10	72086951	72088250
chr10	72096751	72106950
chr10	72119401	72127150
chr10	72134251	72171150
chr10	72180151	72191700
chr10	72199501	72205150
chr10	72212451	72212950
chr10	72230851	72236050
chr10	72340551	72352050
chr10	72366001	72449600
chr10	72455501	72483350
chr10	72488951	72523700
chr10	72538301	72538400
chr10	72555451	72593150
chr10	72598851	72630250
chr10	72639601	72644050
chr10	72687951	72688050
chr10	73013401	73013500
chr10	73194901	73195000
chr10	73200101	73228050
chr10	73335951	73337450
chr10	73353851	73354400
chr10	73378001	73384000
chr10	73393651	73396100
chr10	73402851	73402950
chr10	73456501	73462550
chr10	73482651	73505600
chr10	73511901	73519000
chr10	73565351	73565450
chr10	74040301	74040500
chr10	74353201	74353600
chr10	74699301	74699400
chr10	74729051	74729150
chr10	74761301	74761400
chr10	74769351	74769450
chr10	75031651	75031750
chr10	75067651	75071050
chr10	75306401	75306500
chr10	75312351	75312450
chr10	75339251	75346800
chr10	75356201	75356300
chr10	75585851	75585950
chr10	76208401	76208950
chr10	76252501	76252650
chr10	76467651	76467750
chr10	76475301	76475450
chr10	76525001	76525100
chr10	76534401	76534550
chr10	76681001	76681100
chr10	76711501	76711600
chr10	76716901	76727100
chr10	76750751	76750850
chr10	76766351	76871200
chr10	76877751	76912200
chr10	76917301	76928300
chr10	76935251	76943300
chr10	76951901	76952000
chr10	76960201	76974400
chr10	77021701	77029250
chr10	77035451	77041750
chr10	77051351	77093050
chr10	77100701	77111500
chr10	77130501	77158550
chr10	77165251	77170450
chr10	77185401	77188400
chr10	77193501	77201350
chr10	77206701	77217150
chr10	77233751	77243050
chr10	77270751	77272550
chr10	77278801	77278900
chr10	77296001	77320650
chr10	77331901	77359000
chr10	77364501	77368900
chr10	77375851	77391750
chr10	77396801	77398150
chr10	77410051	77414450
chr10	77419651	77454250
chr10	77461251	77466500
chr10	77473851	77473950
chr10	77481001	77482250
chr10	77491851	77494150
chr10	77515501	77523700
chr10	77534601	77543650
chr10	77553851	77559200
chr10	77579851	77580100
chr10	77607751	77607850
chr10	77618101	77621300
chr10	77628151	77628300
chr10	77648401	77648500
chr10	77733101	77739200
chr10	77766051	77766150
chr10	77834301	77836450
chr10	77860251	77860400
chr10	77892501	77892600
chr10	77952751	77952850
chr10	77972701	77972800
chr10	77979051	77984550
chr10	78011201	78011350
chr10	78030401	78030500
chr10	78060301	78062400
chr10	78069551	78070650
chr10	78108051	78116550
chr10	78152501	78153100
chr10	78168551	78168650
chr10	78208951	78209050
chr10	78225751	78228250
chr10	78243451	78243600
chr10	78255751	78255850
chr10	78266401	78266500
chr10	78306551	78311950
chr10	78317901	78322500
chr10	78331551	78331650
chr10	78342901	78346050
chr10	78366351	78379100
chr10	78396551	78412300
chr10	78424601	78431450
chr10	78447051	78447150
chr10	78457251	78458300
chr10	78466901	78467000
chr10	78494851	78527800
chr10	78534301	78550500
chr10	78567251	78571100
chr10	78576651	78576750
chr10	78585151	78593950
chr10	78600851	78618850
chr10	78626101	78629550
chr10	78643301	78644500
chr10	78653901	78658650
chr10	78667751	78667900
chr10	78678001	78679750
chr10	78688151	78698850
chr10	78704301	78706200
chr10	78713051	78724150
chr10	78729551	78750250
chr10	78764751	78768350
chr10	78773901	78795100
chr10	78800351	78850200
chr10	78858151	78878100
chr10	78883351	78937400
chr10	78942651	78966700
chr10	78973001	78997250
chr10	79004801	79081400
chr10	79089551	79124100
chr10	79129601	79132900
chr10	79139051	79149450
chr10	79160601	79176100
chr10	79196801	79201950
chr10	79310351	79310450
chr10	79498801	79498900
chr10	79511401	79513950
chr10	79525101	79525200
chr10	79545001	79545150
chr10	79582351	79594300
chr10	79599501	79602300
chr10	79607451	79611200
chr10	79620251	79620400
chr10	79633751	79637900
chr10	79643751	79643850
chr10	79649751	79654500
chr10	79669701	79669800
chr10	79734151	79734250
chr10	79743651	79746400
chr10	79757801	79757900
chr10	79763751	79772800
chr10	79796151	79800100
chr10	79807751	79823150
chr10	79837101	79839300
chr10	79845351	79845450
chr10	79857351	79860100
chr10	79866951	79867550
chr10	79873001	79893700
chr10	79901101	79911050
chr10	79920351	79921850
chr10	79932451	79950750
chr10	79963551	79978850
chr10	79989351	80003500
chr10	80009551	80019800
chr10	80025201	80034950
chr10	80045451	80045550
chr10	80051651	80091600
chr10	80103001	80104600
chr10	80113501	80139700
chr10	80148401	80175950
chr10	80183851	80183950
chr10	80203151	80231950
chr10	80240701	80243600
chr10	80249151	80305900
chr10	80318601	80396150
chr10	80428001	80428100
chr10	80457501	80460450
chr10	80486601	80491250
chr10	80732201	80732300
chr10	80750601	80750700
chr10	80757501	80761450
chr10	80776651	80776750
chr10	80802951	80803050
chr10	80808301	80810200
chr10	80918201	80918300
chr10	81677801	81698750
chr10	81729551	81736000
chr10	81745051	81750650
chr10	81796851	81798650
chr10	81881401	81884300
chr10	81890851	81894000
chr10	82002251	82013950
chr10	82024301	82045250
chr10	82083851	82087400
chr10	82104451	82116550
chr10	82287351	82295550
chr10	82301451	82301600
chr10	82316301	82318150
chr10	82325201	82330600
chr10	82346351	82346450
chr10	82355651	82357150
chr10	82364801	82385150
chr10	82393201	82410800
chr10	82417601	82419700
chr10	82430051	82430150
chr10	82435551	82443450
chr10	82480501	82480600
chr10	82487651	82487750
chr10	82495101	82495200
chr10	82549351	82549500
chr10	82565751	82568000
chr10	82629451	82629550
chr10	82644651	82645200
chr10	82747201	82747300
chr10	82763601	82763700
chr10	83036901	83037000
chr10	83320451	83320550
chr10	83458051	83458150
chr10	83500501	83500650
chr10	83572001	83572100
chr10	83622151	83626850
chr10	83646501	83651100
chr10	83713401	83713500
chr10	83811851	83811950
chr10	83824001	83824100
chr10	83954101	83954250
chr10	84210501	84210600
chr10	84219151	84223600
chr10	84416751	84420900
chr10	84486201	84492650
chr10	84565801	84565900
chr10	84573201	84573300
chr10	84583351	84583450
chr10	84596801	84596900
chr10	84617701	84617800
chr10	84680701	84681850
chr10	84807251	84809250
chr10	84852401	84852500
chr10	84865351	84865450
chr10	85269801	85269950
chr10	85276401	85276550
chr10	85289901	85290050
chr10	85311951	85313500
chr10	85323301	85323450
chr10	85427651	85427750
chr10	85448251	85451550
chr10	85572801	85573850
chr10	85626701	85629000
chr10	85642551	85645600
chr10	85658151	85666100
chr10	85672351	85678800
chr10	85687901	85689200
chr10	85713251	85716250
chr10	85745801	85751100
chr10	85761451	85765150
chr10	85784601	85784750
chr10	85803701	85815350
chr10	85828651	85828800
chr10	85908301	85916850
chr10	85923651	85928450
chr10	85935101	85972200
chr10	85980401	86025100
chr10	86037851	86064300
chr10	86286801	86302400
chr10	86313251	86317200
chr10	86325201	86363700
chr10	86370301	86370450
chr10	86403301	86418700
chr10	86429851	86433950
chr10	86439701	86439800
chr10	86445751	86454550
chr10	86471151	86471300
chr10	86513001	86517150
chr10	86547201	86548150
chr10	86568651	86568750
chr10	86578201	86578300
chr10	86587001	86594100
chr10	86600751	86600850
chr10	86612301	86615950
chr10	86628251	86628350
chr10	86657651	86659150
chr10	86671801	86678200
chr10	86683301	86683500
chr10	86695551	86695700
chr10	86705101	86705200
chr10	86808851	86808950
chr10	86857051	86869850
chr10	86888951	86889050
chr10	86897651	86897750
chr10	86913601	86913750
chr10	86924051	86924200
chr10	86954451	86954550
chr10	86987451	86990350
chr10	86996951	86997100
chr10	87002301	87002400
chr10	87176801	87184000
chr10	87194301	87202800
chr10	87208351	87208450
chr10	87279051	87283850
chr10	87319151	87321100
chr10	87330051	87330150
chr10	87344851	87380150
chr10	87399751	87409700
chr10	87416451	87417900
chr10	87431301	87431400
chr10	87472901	87473000
chr10	87527851	87543050
chr10	87582701	87582800
chr10	87601751	87606850
chr10	87613751	87622400
chr10	87661451	87678300
chr10	87686801	87688900
chr10	87696751	87712350
chr10	87729751	87745100
chr10	87751551	87753750
chr10	87764501	87774750
chr10	87784801	87784900
chr10	87791051	87795600
chr10	87803551	87839050
chr10	87850651	87996000
chr10	88001351	88020850
chr10	88030951	88054650
chr10	88059851	88153200
chr10	88283301	88283400
chr10	88296151	88296300
chr10	88302851	88310850
chr10	88316651	88316750
chr10	88323051	88324200
chr10	88330151	88356200
chr10	88376101	88505550
chr10	88687401	88688700
chr10	88696201	88696500
chr10	88711601	88711750
chr10	88721951	88722500
chr10	89370251	89370400
chr10	90842401	90842500
chr10	90950251	90950350
chr10	90956551	90958300
chr10	90991051	90991150
chr10	91000901	91001000
chr10	91055851	91059750
chr10	91121951	91122050
chr10	91131251	91131350
chr10	91164501	91165350
chr10	91170951	91171050
chr10	91176451	91178200
chr10	91185101	91190300
chr10	91216451	91216600
chr10	91224651	91228100
chr10	91236751	91242800
chr10	91252251	91254600
chr10	91262601	91292800
chr10	91298101	91302800
chr10	91308451	91309300
chr10	91314501	91320300
chr10	91556101	91565150
chr10	91572451	91572550
chr10	91579101	91579900
chr10	91585501	91589100
chr10	91600051	91605550
chr10	91615701	91615850
chr10	91635501	91635600
chr10	91648901	91649000
chr10	91660551	91664850
chr10	91670401	91679650
chr10	91691201	91691350
chr10	91701151	91701250
chr10	91720401	91722500
chr10	91735351	91735450
chr10	91826601	91826700
chr10	91841101	91841200
chr10	91874501	91874650
chr10	91897151	91897250
chr10	91913501	91913950
chr10	91921601	91929650
chr10	91966501	91966600
chr10	91974001	91974100
chr10	91997401	91997500
chr10	92022301	92025000
chr10	92091651	92091750
chr10	92203301	92203450
chr10	92215801	92215950
chr10	92234551	92234950
chr10	92279951	92280050
chr10	92339701	92347100
chr10	92356251	92356350
chr10	92365601	92365700
chr10	92436751	92437200
chr10	92454051	92454200
chr10	92461351	92462200
chr10	92472651	92473350
chr10	92486351	92487500
chr10	92497401	92500850
chr10	92516701	92536650
chr10	92550601	92550750
chr10	92565851	92566950
chr10	92581901	92596750
chr10	92603651	92611750
chr10	92657551	92657650
chr10	92714451	92714600
chr10	92733001	92733100
chr10	92850101	92853050
chr10	93109401	93109550
chr10	93133651	93136050
chr10	93332151	93332300
chr10	93392251	93392350
chr10	93430551	93430700
chr10	93436251	93437800
chr10	93448651	93448800
chr10	93474851	93475000
chr10	93490101	93490250
chr10	93633451	93637600
chr10	93987901	93989400
chr10	94131751	94135000
chr10	94145401	94145550
chr10	94428501	94458500
chr10	94464251	94499300
chr10	94520101	94524200
chr10	94529901	94537550
chr10	94543501	94543600
chr10	94556351	94564000
chr10	94811101	94840900
chr10	94863651	94872150
chr10	94880351	94884750
chr10	94892951	94902200
chr10	94915951	94916050
chr10	94923701	94923800
chr10	94945801	94948350
chr10	94964401	94965100
chr10	94972401	94974450
chr10	94986201	94988250
chr10	94996351	94997100
chr10	95024651	95024750
chr10	95041251	95041350
chr10	95065101	95065200
chr10	95073801	95079700
chr10	95101151	95110800
chr10	95125601	95125700
chr10	95231651	95232200
chr10	95297001	95297100
chr10	95306351	95331750
chr10	95337151	95352750
chr10	95359051	95371400
chr10	95388001	95388100
chr10	95469751	95471050
chr10	95478201	95480250
chr10	95503751	95503850
chr10	95528951	95530500
chr10	95535751	95536000
chr10	95548951	95553900
chr10	95566701	95568150
chr10	95591251	95592450
chr10	95613651	95615050
chr10	95639301	95639400
chr10	95726651	95726800
chr10	95740851	95746200
chr10	95751951	95754550
chr10	95762051	95762150
chr10	95791501	95793050
chr10	95819051	95823600
chr10	95858501	95858600
chr10	95900851	95900950
chr10	95907201	95907300
chr10	96012301	96012450
chr10	96151901	96154150
chr10	96160201	96160300
chr10	96367551	96367650
chr10	96373951	96374850
chr10	96397451	96398050
chr10	96413351	96413900
chr10	96423451	96423600
chr10	96516501	96516600
chr10	96553951	96554050
chr10	96570301	96570400
chr10	96677951	96678050
chr10	96738651	96738750
chr10	96749651	96749750
chr10	96805551	96805650
chr10	96933051	96935200
chr10	96946001	96946150
chr10	96961651	96961750
chr10	96978051	96980900
chr10	96986501	97003450
chr10	97009701	97028200
chr10	97034601	97047800
chr10	97053301	97064550
chr10	97069901	97120750
chr10	97127801	97137650
chr10	97143351	97350050
chr10	97470601	97470700
chr10	97505001	97511300
chr10	97519151	97522850
chr10	97534251	97536250
chr10	97542701	97544650
chr10	97587651	97587800
chr10	97594251	97594350
chr10	97677551	97677650
chr10	97686401	97686700
chr10	97712701	97712800
chr10	97720301	97726800
chr10	97732701	97741750
chr10	97760101	97760200
chr10	97952301	97968950
chr10	97975101	97989650
chr10	98004051	98027250
chr10	98036201	98036300
chr10	98043301	98054950
chr10	98061901	98062100
chr10	98068151	98095750
chr10	98105001	98163550
chr10	98170851	98170950
chr10	98178051	98183000
chr10	98190701	98266400
chr10	98374551	98374650
chr10	98388351	98389400
chr10	98425701	98425800
chr10	98469351	98472600
chr10	98490951	98491050
chr10	98513901	98514000
chr10	98541301	98541450
chr10	98551201	98551650
chr10	98748701	98763750
chr10	98776801	98961150
chr10	99069601	99071850
chr10	99157351	99157450
chr10	99249701	99250200
chr10	99269651	99271750
chr10	99332051	99332200
chr10	99459051	99459150
chr10	99517601	99541850
chr10	99547501	99589850
chr10	99595251	99691750
chr10	99698901	99737650
chr10	99749701	99803600
chr10	99810501	99819100
chr10	99828701	99866050
chr10	100014501	100026350
chr10	100031951	100110950
chr10	100116001	100117950
chr10	100124051	100124150
chr10	100130201	100130300
chr10	100218251	100218350
chr10	100266451	100266550
chr10	100277951	100285600
chr10	100303251	100303350
chr10	100368151	100368250
chr10	100413301	100413400
chr10	100674801	100674900
chr10	100834751	100834900
chr10	100981701	100985600
chr10	101009451	101009550
chr10	101025451	101025600
chr10	101035301	101037350
chr10	101046601	101051500
chr10	101069401	101069550
chr10	101078901	101080650
chr10	101128101	101128200
chr10	101135351	101135450
chr10	101236801	101236900
chr10	101247501	101253100
chr10	101282351	101292400
chr10	101297951	101298750
chr10	101308801	101308950
chr10	101516151	101516250
chr10	101596651	101596750
chr10	101820101	101820250
chr10	101826401	101838400
chr10	101850101	101851550
chr10	101879351	101879450
chr10	102099051	102099200
chr10	102212401	102212500
chr10	102221051	102221150
chr10	102230101	102234100
chr10	102248851	102249000
chr10	102269051	102269850
chr10	102312051	102330000
chr10	102336251	102336900
chr10	102345951	102628150
chr10	102748501	102748650
chr10	102763201	102771600
chr10	102776751	102780350
chr10	102815851	102918850
chr10	102925601	103063500
chr10	103069951	103075800
chr10	103081301	103081400
chr10	103089701	103091950
chr10	103100401	103100500
chr10	103230901	103237550
chr10	103308001	103323400
chr10	103505001	103505100
chr10	103512051	103512150
chr10	103521901	103527150
chr10	103591951	103593150
chr10	103826201	103826350
chr10	103946801	103946900
chr10	103953701	103953800
chr10	103976251	103992250
chr10	104140651	104140750
chr10	104156751	104169200
chr10	104185201	104185300
chr10	104464451	104464550
chr10	104574551	104591650
chr10	104661951	104667050
chr10	104698251	104698400
chr10	104791351	104791750
chr10	104818851	104818950
chr10	104881351	104881450
chr10	104990051	104990150
chr10	105000051	105000150
chr10	105012151	105041500
chr10	105207651	105262800
chr10	105285451	105285550
chr10	105302351	105311500
chr10	105324351	105336400
chr10	105531751	105531850
chr10	105684051	105684150
chr10	105788301	105801400
chr10	105809301	105809400
chr10	105821901	105831300
chr10	105929301	105938500
chr10	105965251	105968850
chr10	106024851	106026500
chr10	106076251	106076350
chr10	106100851	106105150
chr10	106112651	106115650
chr10	106125351	106134150
chr10	106143301	106156500
chr10	106178751	106178850
chr10	106206801	106206900
chr10	106225101	106225200
chr10	106230751	106235250
chr10	106251801	106276600
chr10	106285101	106293000
chr10	106302851	106311250
chr10	106322201	106350050
chr10	106362501	106368700
chr10	106380251	106416150
chr10	106426801	106444400
chr10	106449801	106466550
chr10	106482251	106489550
chr10	106506951	106511950
chr10	106519101	106534450
chr10	106541201	106543850
chr10	106559051	106561450
chr10	106566601	106567750
chr10	106580101	106580200
chr10	106588051	106589650
chr10	106597851	106597950
chr10	106630451	106630600
chr10	106643101	106646300
chr10	106651601	106664250
chr10	106670751	106670900
chr10	106678301	106678400
chr10	106687401	106687500
chr10	106696351	106696900
chr10	106711451	106711550
chr10	106741801	106743150
chr10	106751851	106753700
chr10	106775801	106776950
chr10	106784801	106784900
chr10	106807251	106825150
chr10	106834801	106839650
chr10	106845251	106849800
chr10	106857951	106862450
chr10	106885151	106888200
chr10	106905451	106911750
chr10	106924551	106942350
chr10	106950251	106950400
chr10	106966551	106966750
chr10	106999151	106999250
chr10	107013451	107013550
chr10	107019001	107019100
chr10	107028351	107028450
chr10	107041451	107041550
chr10	107058501	107058650
chr10	107090901	107095150
chr10	107101901	107104200
chr10	107116301	107116400
chr10	107138501	107144650
chr10	107235501	107235600
chr10	107244201	107244350
chr10	107256501	107256600
chr10	107288801	107288900
chr10	107410901	107411150
chr10	107452601	107452950
chr10	107461651	107461800
chr10	107493551	107493700
chr10	107505651	107505800
chr10	107514801	107515900
chr10	107533701	107540750
chr10	107739851	107739950
chr10	107864401	107864500
chr10	107934801	107934950
chr10	107955901	107961100
chr10	107997301	107997450
chr10	108017151	108017750
chr10	108069251	108069400
chr10	108091951	108092050
chr10	108104251	108104350
chr10	108115601	108120700
chr10	108156151	108156250
chr10	108164151	108164250
chr10	108234051	108234150
chr10	108307901	108308050
chr10	108665151	108669950
chr10	108682451	108682600
chr10	108711351	108714900
chr10	108723251	108723350
chr10	108821801	108821900
chr10	108913051	108913800
chr10	108994101	108994200
chr10	109167301	109167400
chr10	109664101	109664500
chr10	110261251	110261350
chr10	110366501	110372900
chr10	111018101	111018600
chr10	111095301	111096150
chr10	111131301	111132400
chr10	111204201	111208600
chr10	111221501	111221600
chr10	111228451	111228550
chr10	111267551	111267650
chr10	111319301	111321000
chr10	111331451	111331550
chr10	111341501	111341650
chr10	111351601	111351750
chr10	111372651	111372750
chr10	111394951	111400100
chr10	111412951	111413950
chr10	111426001	111426550
chr10	111446351	111448100
chr10	111469801	111469900
chr10	111536001	111536100
chr10	111570051	111570200
chr10	111581701	111581800
chr10	111807201	111807300
chr10	111915401	111922050
chr10	112075101	112075950
chr10	112091951	112117200
chr10	112123151	112124450
chr10	112132401	112133300
chr10	112155301	112155400
chr10	112181701	112181800
chr10	112198501	112198600
chr10	112204451	112211350
chr10	112229501	112232100
chr10	112243651	112248950
chr10	112392751	112392850
chr10	112612251	112612350
chr10	112811051	112811150
chr10	112818251	112881450
chr10	112888151	112902500
chr10	112911151	112911250
chr10	112916351	112916450
chr10	112936201	112937150
chr10	112953001	112956050
chr10	112995551	112999650
chr10	113006551	113011000
chr10	113026251	113035600
chr10	113048901	113052950
chr10	113070401	113070500
chr10	113097501	113097650
chr10	113109901	113112950
chr10	113122351	113122450
chr10	113131951	113132050
chr10	113147851	113147950
chr10	113155201	113155500
chr10	113169901	113170050
chr10	113179351	113179450
chr10	113190151	113190300
chr10	113196851	113196950
chr10	113209001	113209100
chr10	113217801	113221950
chr10	113266301	113266400
chr10	113288501	113288600
chr10	113301001	113301550
chr10	113325951	113326050
chr10	113348051	113350800
chr10	113384251	113384400
chr10	113406901	113407000
chr10	113430451	113430550
chr10	113456001	113456100
chr10	113480851	113481000
chr10	113505451	113516050
chr10	113527901	113528000
chr10	113553451	113553650
chr10	113571551	113585550
chr10	113664251	113664350
chr10	113673751	113673850
chr10	113701901	113702000
chr10	113726201	113728900
chr10	113734251	113750050
chr10	113756951	113757150
chr10	113762201	113762300
chr10	113775151	113775250
chr10	113787001	113787250
chr10	113795401	113805900
chr10	113819651	113829950
chr10	113838351	113844150
chr10	113866201	113898050
chr10	113941551	113945800
chr10	113951201	113951350
chr10	113957151	113968150
chr10	113975951	113976100
chr10	113981251	113986650
chr10	113991851	113995250
chr10	114007151	114007250
chr10	114024301	114025350
chr10	114033051	114117600
chr10	114123251	114134400
chr10	114143201	114145750
chr10	114159201	114162800
chr10	114168651	114171500
chr10	114588801	114591700
chr10	114601201	114601350
chr10	114607501	114612650
chr10	114625651	114626600
chr10	114632501	114645100
chr10	114662451	114662550
chr10	114668451	114668550
chr10	114832601	114832700
chr10	114891051	114891150
chr10	114937551	114942500
chr10	114971551	114975350
chr10	114983701	115018800
chr10	115030201	115036050
chr10	115042701	115047250
chr10	115054201	115057950
chr10	115067751	115096850
chr10	115102501	115109700
chr10	115120201	115165300
chr10	115170551	115213850
chr10	115220451	115232650
chr10	115241451	115254350
chr10	115264901	115268800
chr10	115275051	115275150
chr10	115287801	115287900
chr10	115317251	115354650
chr10	115361001	115376850
chr10	115384651	115384750
chr10	115392301	115392450
chr10	115400401	115404850
chr10	115421001	115421100
chr10	115485151	115494300
chr10	115553151	115553250
chr10	115687801	115687900
chr10	115740901	115741050
chr10	115972951	115977250
chr10	115983451	116041200
chr10	116048751	116075650
chr10	116081101	116102600
chr10	116109201	116111450
chr10	116124051	116124500
chr10	116133851	116140100
chr10	116148501	116162950
chr10	116366001	116366100
chr10	116376001	116386000
chr10	116396351	116396500
chr10	116497101	116499450
chr10	116511151	116518900
chr10	116524101	116528700
chr10	116543301	116543550
chr10	116561351	116561500
chr10	116617451	116617550
chr10	116632701	116632850
chr10	116654151	116654250
chr10	116661051	116666550
chr10	116678801	116678900
chr10	116841001	116841150
chr10	116989601	116989850
chr10	116995001	116995100
chr10	117545451	117545550
chr10	117580651	117581050
chr10	117597351	117602250
[truncated: 42,406 more rows]

## Sheet: EWS502 FAIRE peaks
chr10	703831	705125
chr10	1255774	1255893
chr10	1268427	1268771
chr10	1407773	1408414
chr10	1536899	1537528
chr10	1629635	1629878
chr10	1634750	1635080
chr10	1701959	1702199
chr10	2337504	2337888
chr10	2522251	2522489
chr10	2532601	2533288
chr10	2701959	2702193
chr10	2786948	2787711
chr10	2920086	2920916
chr10	2939316	2939631
chr10	3274372	3275022
chr10	3834425	3835332
chr10	3841130	3841668
chr10	4163880	4164917
chr10	4724158	4724692
chr10	5368449	5369304
chr10	5402393	5402764
chr10	5412757	5413705
chr10	5528850	5529790
chr10	6469097	6469436
chr10	6847050	6847643
chr10	6867538	6868290
chr10	8194690	8195312
chr10	8595215	8595515
chr10	10375874	10376233
chr10	14057093	14057539
chr10	15311187	15311750
chr10	18450074	18450626
chr10	20114157	20114648
chr10	30297670	30297950
chr10	31102573	31103129
chr10	32298797	32299184
chr10	33786317	33786780
chr10	43040678	43041160
chr10	44110787	44111049
chr10	44728732	44729052
chr10	44741243	44741828
chr10	44784337	44784708
chr10	45948360	45948793
chr10	46442875	46443221
chr10	46477788	46479610
chr10	47108589	47109106
chr10	47134139	47134939
chr10	47139867	47140204
chr10	47251971	47252481
chr10	48334971	48335202
chr10	49686993	49687513
chr10	50132102	50132464
chr10	50619657	50619824
chr10	58598582	58598914
chr10	71969605	71970325
chr10	72134238	72135266
chr10	72390453	72391068
chr10	72854734	72855418
chr10	72861842	72862504
chr10	75241688	75241971
chr10	78900657	78901264
chr10	79626844	79627217
chr10	80330896	80331684
chr10	80455555	80456234
chr10	80544087	80544465
chr10	80755162	80756209
chr10	80806724	80807150
chr10	82405696	82405953
chr10	82407400	82409085
chr10	84366753	84367220
chr10	85927253	85928426
chr10	85936762	85937044
chr10	87664765	87665709
chr10	87866993	87867430
chr10	87870934	87871490
chr10	88403514	88404331
chr10	98551192	98551501
chr10	104199283	104199794
chr10	105545215	105546219
chr10	105585959	105586271
chr10	107719614	107720126
chr10	115428328	115428587
chr10	119017959	119019038
chr10	119250113	119250717
chr10	119312917	119313533
chr10	119675885	119676481
chr10	119987423	119987935
chr10	120032015	120032807
chr10	120234989	120235675
chr10	121062410	121062953
chr10	121143694	121144020
chr10	122837047	122837278
chr10	124452925	124453404
chr10	124475104	124475498
chr10	125003726	125004100
chr10	125720386	125720657
chr10	127821650	127822209
chr10	128570712	128571001
chr10	128704747	128705615
chr10	129748039	129748613
chr10	130067707	130068127
chr10	130126712	130127030
chr10	130159432	130160467
chr10	130573547	130574692
chr10	130704182	130705128
chr10	130765515	130765847
chr10	130854021	130854465
chr10	131895026	131895857
chr10	132072563	132072903
chr10	132445115	132445550
chr10	132478589	132479057
chr10	132613919	132614284
chr10	132760739	132761619
chr10	132836495	132837169
chr10	132864283	132865003
chr10	132936072	132936652
chr10	133200645	133201112
chr10	133369854	133370367
chr10	133391717	133392446
chr10	133522888	133523492
chr10	133818484	133818877
chr10	133837396	133837617
chr10	133844166	133844826
chr10	134027728	134027988
chr10	134055981	134056272
chr10	134078936	134079381
chr10	134177659	134177934
chr10	134228858	134229512
chr10	134674109	134674681
chr10	134785354	134785621
chr10	134819968	134820691
chr10	134918190	134918795
chr10	135001028	135001295
chr10	135012521	135013063
chr11	339799	340326
chr11	347090	347464
chr11	526263	526915
chr11	944636	944871
chr11	1007561	1007837
chr11	1021963	1023053
chr11	1081749	1083644
chr11	1130455	1132037
chr11	1318209	1319454
chr11	1469092	1469359
chr11	1648186	1648517
chr11	1708580	1709204
chr11	1917521	1917836
chr11	2109125	2109550
chr11	2164749	2165446
chr11	2194080	2195015
chr11	2562078	2562615
chr11	2777198	2777471
chr11	3151967	3152318
chr11	3184116	3185340
chr11	3194660	3194931
chr11	6212358	6213016
chr11	6363246	6363497
chr11	8806954	8807454
chr11	10534728	10535045
chr11	11224384	11225585
chr11	12146095	12146482
chr11	15276830	15277272
chr11	15885669	15885997
chr11	17742151	17742664
chr11	18201098	18201401
chr11	21413421	21413644
chr11	30790915	30791321
chr11	37142999	37143414
chr11	39436667	39436994
chr11	41510453	41511145
chr11	44252261	44252555
chr11	44285881	44286184
chr11	44482280	44483293
chr11	44768191	44769191
chr11	44920071	44920221
chr11	44956242	44957008
chr11	47334035	47334234
chr11	49145883	49146148
chr11	56737746	56738330
chr11	59293969	59294619
chr11	60223428	60223618
chr11	60640415	60641090
chr11	60796054	60796438
chr11	61021438	61021982
chr11	61467972	61468614
chr11	61616796	61616937
chr11	61761473	61761996
chr11	62177314	62177892
chr11	63670718	63671100
chr11	63794846	63795079
chr11	63903855	63904182
chr11	63931649	63932198
chr11	64105821	64106515
chr11	64303352	64303632
chr11	65130963	65131474
chr11	65358942	65359170
chr11	65417422	65417668
chr11	65851449	65851872
chr11	66967805	66968270
chr11	67192512	67192739
chr11	67268979	67269476
chr11	68235138	68235657
chr11	68340654	68341066
chr11	68588784	68589025
chr11	68634557	68635263
chr11	68712998	68713532
chr11	68718502	68718736
chr11	68815916	68816158
chr11	69119844	69120221
chr11	69146003	69146305
chr11	69204645	69205083
chr11	69364671	69365866
chr11	69548978	69549525
chr11	69894965	69895506
chr11	70140554	70141172
chr11	70225497	70226026
chr11	70310530	70311225
chr11	70775058	70775284
chr11	70779528	70779939
chr11	70959430	70959770
chr11	70966118	70966568
chr11	70969101	70969334
chr11	72110746	72111066
chr11	73857283	73857608
chr11	76524360	76524754
chr11	76581133	76581939
chr11	83030381	83030694
chr11	83135711	83136509
chr11	84449442	84449690
chr11	86313916	86314222
chr11	89050121	89050397
chr11	92078484	92078893
chr11	95615709	95616073
chr11	102106896	102107390
chr11	102485811	102486355
chr11	105197098	105197762
chr11	110380962	110381251
chr11	110734032	110734813
chr11	110822475	110822700
chr11	111630903	111631277
chr11	111777922	111778189
chr11	112651263	112651565
chr11	114522713	114522991
chr11	116818081	116818521
chr11	117185668	117186113
chr11	118251713	118252011
chr11	119117646	119117963
chr11	119227272	119227665
chr11	119704372	119704692
chr11	120251858	120252585
chr11	120368099	120368378
chr11	120483778	120485006
chr11	121534428	121534723
chr11	121629788	121630101
chr11	122958795	122959608
chr11	124597585	124598083
chr11	124779598	124779882
chr11	125826104	125826558
chr11	125832210	125832835
chr11	125853750	125854036
chr11	125872130	125872525
chr11	126174042	126174785
chr11	126238329	126238980
chr11	128165032	128165282
chr11	128273635	128274323
chr11	128749902	128750301
chr11	131055640	131055963
chr11	131240618	131240989
chr11	131242371	131243004
chr11	131351202	131351478
chr11	131418933	131419321
chr11	131500542	131500762
chr11	131537572	131537991
chr11	131844390	131844821
chr11	131914530	131915219
chr11	131958286	131958555
chr11	132402479	132402759
chr11	132729189	132729589
chr11	132961666	132962881
chr11	133113605	133114853
chr11	133276715	133278104
chr11	133896992	133897722
chr11	133940613	133940723
chr11	134114993	134115276
chr11	134300433	134300933
chr11	134451834	134451942
chr12	386235	386663
chr12	560160	560840
chr12	1584461	1584841
chr12	1850645	1851115
chr12	1912191	1912450
chr12	2170837	2171051
chr12	2235096	2235418
chr12	2417321	2417621
chr12	2581785	2582258
chr12	2792320	2792612
chr12	3085780	3086087
chr12	5460489	5461782
chr12	5775776	5776090
chr12	6011937	6012595
chr12	6160527	6161368
chr12	6597226	6597587
chr12	6797092	6797404
chr12	12091652	12092305
chr12	24351880	24352063
chr12	28394877	28395091
chr12	31061865	31062307
chr12	34066271	34066597
chr12	34280039	34280775
chr12	36798620	36799399
chr12	40043707	40043807
chr12	43904830	43905129
chr12	44241501	44242031
chr12	48557796	48558303
chr12	51046568	51046913
chr12	52618433	52619013
chr12	53304708	53305319
chr12	54652967	54653314
chr12	55576022	55576752
chr12	55792076	55792358
chr12	55871773	55872339
chr12	56167731	56168109
chr12	64746956	64747268
chr12	66228160	66228717
chr12	72997675	72997942
chr12	74687132	74687551
chr12	77657497	77657866
chr12	79390790	79391130
chr12	79523600	79524172
chr12	79524997	79525209
chr12	80212205	80212651
chr12	80536029	80536293
chr12	83924675	83924929
chr12	84278193	84278531
chr12	85166014	85166294
chr12	88251453	88251897
chr12	88330449	88331073
chr12	89476953	89477322
chr12	90098913	90099224
chr12	90602274	90602782
chr12	92120593	92120820
chr12	95082067	95082358
chr12	103406126	103406901
chr12	103588218	103589076
chr12	104388012	104388654
chr12	106380154	106381905
chr12	107280939	107281450
chr12	107496170	107497386
chr12	107512792	107514007
chr12	107776909	107777810
chr12	108557923	108558280
chr12	108749684	108750333
chr12	109783122	109783356
chr12	109852383	109853079
chr12	111720442	111720742
chr12	112587329	112587941
chr12	113826516	113827246
chr12	114100088	114100647
chr12	114174524	114174931
chr12	114659938	114660235
chr12	115304500	115304950
chr12	117497542	117498106
chr12	118402659	118403619
chr12	122560321	122561735
chr12	122562373	122562598
chr12	123143650	123144457
chr12	123340563	123341379
chr12	123481185	123481940
chr12	123569482	123569818
chr12	123726968	123727766
chr12	124728971	124729665
chr12	125376993	125378034
chr12	126286667	126287847
chr12	126747439	126747741
chr12	127240249	127241026
chr12	127255761	127256094
chr12	127383808	127384691
chr12	127716016	127717204
chr12	128127741	128128468
chr12	128187468	128187651
chr12	128798047	128798537
chr12	128867998	128868556
chr12	129105144	129105524
chr12	129247444	129248311
chr12	129274172	129274745
chr12	129298046	129298575
chr12	129350897	129351010
chr12	129489510	129489767
chr12	129634851	129635350
chr12	130249343	130250503
chr12	130322066	130322374
chr12	130334178	130334448
chr12	130354375	130354822
chr12	130445369	130447271
chr12	130449447	130450067
chr12	130527925	130528362
chr12	130589519	130591786
chr12	130707579	130708062
chr12	130733576	130733946
chr12	131105518	131106367
chr12	131206799	131207018
chr12	131231524	131232183
chr12	131319854	131321271
chr12	131354735	131355040
chr12	131436474	131436842
chr12	131497738	131498576
chr12	131509738	131509977
chr12	131542264	131542620
chr12	131550037	131550348
chr12	131684032	131684771
chr12	132038391	132038742
chr13	18546608	18547202
chr13	19865706	19866001
chr13	19969673	19970067
chr13	21442779	21443111
chr13	21599395	21599657
chr13	22405516	22406161
chr13	23030673	23031166
chr13	23828313	23828521
chr13	24153780	24154727
chr13	24646966	24647460
chr13	26444725	26445057
chr13	26931825	26932083
chr13	27379480	27380045
chr13	28003875	28004140
chr13	28963956	28964299
chr13	29398243	29398494
chr13	30314641	30315005
chr13	30488923	30489426
chr13	32449336	32449738
chr13	32906811	32907270
chr13	33551691	33552016
chr13	34338306	34338666
chr13	35233282	35233775
chr13	35429835	35430546
chr13	35952936	35953341
chr13	38797068	38797479
chr13	38841623	38842006
chr13	38923942	38924205
chr13	39276250	39276541
chr13	39421111	39423635
chr13	42761298	42761539
chr13	43829929	43830544
chr13	45860305	45860877
chr13	50468240	50468549
chr13	51398054	51398396
chr13	57100909	57101144
chr13	59015740	59016015
chr13	62282789	62283262
chr13	62382606	62383480
chr13	63559769	63560114
chr13	77165557	77166150
chr13	79629931	79630460
chr13	85209125	85209560
chr13	89764453	89764984
chr13	93107939	93108349
chr13	93484420	93484681
chr13	94360408	94360809
chr13	96779752	96780011
chr13	96789248	96789655
chr13	97728308	97728813
chr13	97931815	97932519
chr13	98203206	98203616
chr13	98886862	98887183
chr13	99381131	99381573
chr13	100721758	100722248
chr13	104014847	104015098
chr13	105064170	105065130
chr13	105448713	105449179
chr13	105824626	105825233
chr13	106046252	106046733
chr13	106439797	106440104
chr13	107607281	107607564
chr13	108743535	108743908
chr13	109104843	109105578
chr13	109493844	109494145
chr13	109558647	109559356
chr13	109680546	109680775
chr13	109767125	109767882
chr13	109858797	109859669
chr13	110324399	110324652
chr13	110494705	110494968
chr13	110808242	110808865
chr13	110961497	110962146
chr13	111070607	111071889
chr13	111140693	111141151
chr13	111642057	111642928
chr13	111644203	111644622
chr13	111780800	111781610
chr13	112060237	112060552
chr13	112228639	112229443
chr13	112368316	112368578
chr13	112614960	112615442
chr13	112723011	112723386
chr13	112754998	112755507
chr13	113165910	113166256
chr13	113316341	113316666
chr13	113614280	113614765
chr13	113636143	113636511
chr13	113917569	113918037
chr13	113925526	113926161
chr14	36299135	36299542
chr14	41346835	41347929
chr14	51875449	51876501
chr14	54629045	54629439
chr14	56350790	56351422
chr14	64302176	64303080
chr14	64710270	64710884
chr14	65355134	65355409
chr14	66581125	66581223
chr14	68435282	68435626
chr14	68805326	68806393
chr14	69375632	69376621
chr14	74767130	74767693
chr14	75518046	75518271
chr14	75965840	75966375
chr14	76805861	76806096
chr14	82260734	82261451
chr14	86049580	86049936
chr14	86420471	86420993
chr14	86480052	86480301
chr14	87307347	87307685
chr14	94127039	94127275
chr14	94187059	94187603
chr14	94425430	94425710
chr14	94473445	94474340
chr14	94602150	94602758
chr14	94794762	94794875
chr14	94933993	94934228
chr14	95508155	95508511
chr14	96587965	96588619
chr14	96602570	96602856
chr14	96717545	96717709
chr14	96751493	96751856
chr14	97431287	97431582
chr14	98246255	98246915
chr14	98956843	98957099
chr14	99193668	99193936
chr14	100062675	100063151
chr14	100243135	100243498
chr14	100999809	101000312
chr14	101091709	101092069
chr14	101219242	101219962
chr14	102059014	102059986
chr14	102614044	102614538
chr14	102641028	102641649
chr14	103700684	103701074
chr14	103767600	103768426
chr14	104008952	104009268
chr14	104064075	104064383
chr14	104202266	104202539
chr14	104516991	104517638
chr14	105108058	105108565
chr14	105222283	105223054
chr14	105227381	105227682
chr15	18368082	18368336
chr15	26024570	26025238
chr15	28252627	28252937
chr15	32487530	32487945
chr15	68637879	68638889
chr15	69278735	69279432
chr15	75703073	75703476
chr15	75818015	75818405
chr15	75889486	75890014
chr15	75964834	75965725
chr15	77072226	77072888
chr15	77171394	77171663
chr15	78524319	78524582
chr15	89607662	89608131
chr15	92395749	92396008
chr16	560690	560852
chr16	967758	968104
chr16	971195	971470
chr16	1140174	1140768
chr16	1227890	1228159
chr16	1236912	1237207
chr16	1254242	1254833
chr16	2213194	2213680
chr16	2527199	2527572
chr16	2826904	2827204
chr16	4262939	4263129
chr16	4658635	4659209
chr16	6683459	6683844
chr16	7352292	7352830
chr16	8566574	8566965
chr16	9154564	9155571
chr16	10041228	10042578
chr16	15519040	15519564
chr16	23821619	23821907
chr16	25832688	25832944
chr16	28008136	28008486
chr16	29963739	29964623
chr16	31013643	31014011
chr16	31792383	31792681
chr16	32482287	32482548
chr16	33148448	33148743
chr16	33201187	33201605
chr16	33843440	33843869
chr16	33847401	33847660
chr16	45506043	45507578
chr16	45648381	45648671
chr16	46446229	46446816
chr16	46635716	46636010
chr16	47523872	47524078
chr16	47607477	47607927
chr16	47853267	47853748
chr16	47942141	47942629
chr16	48066642	48067048
chr16	48185733	48186262
chr16	49283600	49284477
chr16	50569251	50569539
chr16	51345762	51346425
chr16	53610385	53611782
chr16	54056969	54057363
chr16	54326529	54326905
chr16	54408948	54409321
chr16	55651712	55651975
chr16	56326658	56327399
chr16	65752270	65753220
chr16	65774883	65775146
chr16	69975801	69976354
chr16	71842948	71843203
chr16	71877761	71878205
chr16	78378296	78378398
chr16	78466637	78467238
chr16	80206636	80206966
chr16	80218093	80218531
chr16	80811357	80812485
chr16	81588223	81588381
chr16	83521496	83521672
chr16	83540453	83540739
chr16	83812347	83812672
chr16	83836877	83837136
chr16	83904929	83905343
chr16	83991157	83991686
chr16	84110294	84110999
chr16	84113682	84114782
chr16	84163113	84163942
chr16	84772027	84772500
chr16	84815635	84816289
chr16	84984503	84985521
chr16	85055091	85055500
chr16	85178693	85178933
chr16	85448694	85449246
chr16	85451954	85452332
chr16	85500316	85500989
chr16	85523588	85524246
chr16	85541996	85542474
chr16	85715292	85717074
chr16	85778057	85778364
chr16	85778498	85778755
chr16	85800767	85802077
chr16	86093173	86093603
chr16	86188500	86188796
chr16	86643358	86644307
chr16	86783644	86784312
chr16	86921613	86923542
chr16	86924921	86925343
chr16	86940272	86940779
chr16	86973863	86974093
chr16	87616732	87617217
chr16	87916621	87917103
chr16	88083083	88083313
chr17	94454	95115
chr17	4752657	4753297
chr17	6957233	6957999
chr17	9559875	9560288
chr17	9660192	9661083
chr17	11147131	11147689
chr17	12869169	12869273
chr17	15308825	15309258
chr17	17304075	17304527
chr17	17883268	17883599
chr17	21828452	21828701
chr17	21830836	21831089
chr17	24070659	24071142
chr17	32171826	32172150
chr17	37043281	37043649
chr17	37061576	37062283
chr17	41348370	41349007
chr17	45110297	45110688
chr17	53081358	53081998
chr17	62452514	62452888
chr17	67696342	67697775
chr17	67811263	67812472
chr17	68065040	68065460
chr17	69187435	69188031
chr17	69461178	69461468
chr17	69583779	69584046
chr17	69972622	69973166
chr17	70076567	70077221
chr17	70240896	70241442
chr17	72055164	72055756
chr17	72992222	72992853
chr17	73225737	73226886
chr17	73359940	73360254
chr17	73797551	73797980
chr17	74919905	74920123
chr17	75028799	75029058
chr17	75612712	75613419
chr17	76099789	76100386
chr17	76757941	76758975
chr17	76796175	76796690
chr17	76841681	76842651
chr17	76888921	76889784
chr17	77004734	77005131
chr17	77013854	77014592
chr17	78269170	78269420
chr18	70759	71063
chr18	4500803	4501138
chr18	6910127	6910569
chr18	8953273	8953712
chr18	9814040	9814658
chr18	10502702	10503064
chr18	11237605	11237864
chr18	12419940	12421239
chr18	12980087	12980458
chr18	13435412	13435942
chr18	20569980	20570251
chr18	20674530	20674746
chr18	26819618	26820208
chr18	30544510	30544791
chr18	33117682	33118390
chr18	33614013	33614754
chr18	37770663	37771026
chr18	38109777	38110610
chr18	42168518	42168775
chr18	42225572	42226224
chr18	42231896	42232390
chr18	42309155	42309492
chr18	42350294	42350992
chr18	42441882	42442261
chr18	42531816	42532666
chr18	42558959	42559111
chr18	42801300	42801604
chr18	42807258	42807570
chr18	44438396	44438704
chr18	44800115	44800475
chr18	44826728	44827023
chr18	45241062	45241660
chr18	47107394	47107761
chr18	48207999	48208412
chr18	48480408	48480736
chr18	52288819	52289083
chr18	52911925	52912382
chr18	54330709	54331157
chr18	54599823	54600131
chr18	58910073	58910308
chr18	58921350	58921700
chr18	59016648	59016950
chr18	61808068	61808912
chr18	63920097	63920397
chr18	66524093	66524622
chr18	70463866	70464312
chr18	70970578	70972050
chr18	70975235	70975517
chr18	71202361	71202609
chr18	72185014	72185274
chr18	72452435	72453520
chr18	72808130	72808517
chr18	72959371	72960003
chr18	73100268	73100510
chr18	73240516	73241748
chr18	73681007	73681844
chr18	73797984	73798270
chr18	73825659	73825953
chr18	74013231	74014007
chr18	74098936	74099617
chr18	74310366	74310611
chr18	74410278	74410455
chr18	74466959	74467348
chr18	74497166	74498855
chr18	74499734	74500071
chr18	74564591	74564978
chr18	74599953	74600502
chr18	74670573	74670800
chr18	74822439	74823665
chr18	75285093	75285861
chr18	75286716	75287224
chr18	75424728	75425010
chr18	75494744	75494976
chr18	76035424	76036343
chr19	3986639	3986875
chr19	18414252	18414537
chr19	35299295	35299880
chr19	35883874	35884448
chr19	38432386	38432689
chr19	38641224	38641714
chr19	38688185	38688773
chr1	704782	705786
chr1	1243506	1243758
chr1	1618011	1618464
chr1	1831235	1831499
chr1	1840908	1841135
chr1	2076314	2077359
chr1	2200357	2201277
chr1	2248585	2249010
chr1	2529630	2529926
chr1	2694684	2694976
chr1	2802783	2803057
chr1	2821769	2822396
chr1	2822531	2822845
chr1	2851062	2851239
chr1	2932527	2933013
chr1	3035396	3036032
chr1	3053431	3053702
chr1	3217075	3217587
chr1	3228402	3228866
chr1	3316408	3316669
chr1	3376688	3377180
chr1	3511761	3512086
chr1	3585700	3586332
chr1	4104233	4104576
chr1	4296303	4296994
chr1	4329316	4329822
chr1	4606810	4607195
chr1	4726767	4727686
chr1	5119998	5120385
chr1	5727205	5727635
chr1	5791005	5791468
chr1	5812138	5812538
chr1	5851028	5851302
chr1	6013300	6013682
chr1	6919567	6919954
chr1	6947793	6948103
chr1	7086305	7086608
chr1	7129887	7130520
chr1	7462463	7462878
chr1	7475086	7475428
chr1	7480946	7481200
chr1	7551027	7551151
chr1	7637442	7637778
chr1	8259603	8259899
chr1	9042538	9043032
chr1	9276335	9277194
chr1	9393662	9393892
chr1	10644238	10644614
chr1	10645050	10645546
chr1	10760154	10760419
chr1	11356834	11357261
chr1	11684606	11685905
chr1	11712725	11713217
chr1	11926965	11927247
chr1	12567329	12567814
chr1	13861655	13862023
chr1	14691630	14692033
chr1	15307818	15309585
chr1	18248812	18249121
chr1	18302619	18303068
chr1	18854694	18854979
chr1	19001301	19001972
chr1	19024198	19024510
chr1	19056515	19057817
chr1	20652214	20654154
chr1	21545088	21545402
chr1	22777594	22777795
chr1	22849272	22849572
chr1	22877026	22877979
chr1	23591389	23591503
chr1	25169923	25170396
chr1	25218675	25219395
chr1	25235299	25235617
chr1	25728203	25728733
chr1	25967793	25968073
chr1	27285590	27286216
chr1	27306028	27306332
chr1	27807854	27808068
chr1	30070955	30071482
chr1	30497506	30497681
chr1	30504126	30504566
chr1	30523197	30523488
chr1	30583862	30584880
chr1	30709451	30710270
chr1	30733486	30734810
chr1	30880130	30880583
chr1	30963233	30964081
chr1	31139950	31140271
chr1	32013733	32014541
chr1	32511316	32511768
chr1	33602484	33602757
chr1	36364519	36364995
chr1	36852037	36852405
chr1	36873556	36873845
chr1	37000134	37001130
chr1	37557067	37557466
chr1	37849921	37850019
chr1	38463445	38463884
chr1	41633657	41633906
chr1	41662770	41663699
chr1	41783210	41783657
chr1	42127010	42127721
chr1	43060925	43061305
chr1	44643321	44643635
chr1	44968882	44969448
chr1	47830085	47830585
chr1	48174969	48175227
chr1	48341701	48342030
chr1	48464959	48465658
chr1	49234335	49235098
chr1	50607293	50607497
chr1	53777311	53777709
chr1	54358331	54358973
chr1	54714336	54714871
chr1	55240988	55241447
chr1	57858951	57859878
chr1	57942972	57943322
chr1	57965749	57966104
chr1	61096539	61096963
chr1	62510347	62510704
chr1	63163397	63163677
chr1	64587196	64587620
chr1	66787274	66787621
chr1	68452305	68452547
chr1	72741845	72742371
chr1	76580856	76581445
chr1	78658721	78659840
chr1	79299130	79300169
chr1	85006943	85007346
chr1	85818569	85819115
chr1	88695321	88695788
chr1	90147043	90147323
chr1	96044152	96044639
chr1	103965281	103965530
chr1	112514750	112515140
chr1	114398118	114398977
chr1	114541640	114541748
chr1	114562842	114563115
chr1	115647749	115647891
chr1	115952373	115952601
chr1	115985284	115986144
chr1	116051071	116051381
chr1	116700203	116700720
chr1	117034974	117035290
chr1	117041274	117041673
chr1	117222237	117222560
chr1	117404218	117404509
chr1	119252768	119253203
chr1	143241563	143241764
chr1	144988663	144988871
chr1	145479362	145479653
chr1	146579962	146580220
chr1	147117385	147117826
chr1	147851521	147851830
chr1	148474873	148475278
chr1	150029420	150030107
chr1	152846682	152847101
chr1	152952727	152953859
chr1	153480011	153480363
chr1	154429347	154430435
chr1	158430470	158430759
chr1	159680797	159681051
chr1	159688209	159688486
chr1	159702938	159703246
chr1	160192565	160192834
chr1	161081377	161081699
chr1	161826366	161826660
chr1	162038657	162039019
chr1	162794851	162795171
chr1	165292711	165293048
chr1	165398817	165399184
chr1	167857193	167857422
chr1	170616620	170616985
chr1	173265569	173265919
chr1	173610057	173610405
chr1	175247183	175247616
chr1	175587258	175588017
chr1	175965585	175965862
chr1	179372245	179372866
chr1	180472615	180472812
chr1	182346738	182347072
chr1	183951755	183952067
chr1	199241819	199243398
chr1	199671501	199671860
chr1	199906262	199906767
chr1	200440954	200441376
chr1	200860571	200860973
chr1	200959501	200959766
chr1	201203176	201203568
chr1	201542444	201542740
chr1	201762290	201763420
chr1	202430829	202431071
chr1	202873261	202873543
chr1	203259928	203260194
chr1	203712407	203712833
chr1	204701769	204702035
chr1	205163390	205164543
chr1	206389004	206389426
chr1	207769172	207769516
chr1	208010590	208010882
chr1	210929525	210930227
chr1	211614842	211615107
chr1	212700491	212700765
chr1	213739581	213739979
chr1	217485072	217485343
chr1	224903490	224904087
chr1	225099410	225099707
chr1	225214126	225215416
chr1	226192361	226192911
chr1	226300795	226300975
chr1	226357550	226357995
chr1	226394254	226394733
chr1	226492713	226493327
chr1	226661039	226661380
chr1	226822297	226822406
chr1	226824521	226824620
chr1	226837927	226838179
chr1	226842405	226842557
chr1	226846874	226846982
chr1	226849054	226849374
chr1	226984015	226984431
chr1	227180271	227180565
chr1	227182169	227182523
chr1	227262769	227262869
chr1	227426392	227427022
chr1	227990472	227990849
chr1	228073016	228073609
chr1	228173972	228174315
chr1	228471312	228471634
chr1	228537670	228538511
chr1	228776800	228777296
chr1	229828894	229829181
chr1	229935599	229935904
chr1	231124941	231125208
chr1	232926008	232926656
chr1	232979861	232980101
chr1	234315415	234315979
chr1	234331629	234331901
chr1	234379627	234380360
chr1	234884606	234884761
chr1	236281381	236281930
chr1	238792874	238793314
chr1	239535939	239537238
chr1	242228461	242229182
chr1	243694122	243694786
chr1	243811616	243812006
chr1	244028214	244028420
chr1	245055432	245055827
chr1	247151299	247152131
chr20	1116923	1117443
chr20	1206591	1207108
chr20	1778919	1779219
chr20	4042559	4043048
chr20	4412247	4412516
chr20	9097386	9097803
chr20	11298238	11298489
chr20	19250862	19251133
chr20	19608577	19608875
chr20	21504793	21505019
chr20	23116839	23117387
chr20	23173971	23174526
chr20	23382153	23383218
chr20	23588289	23588997
chr20	23908621	23908912
chr20	23931476	23932237
chr20	24137187	24137528
chr20	24263420	24263967
chr20	24527403	24527754
chr20	24700691	24701074
chr20	24995389	24997095
chr20	29897469	29897926
chr20	31360144	31360566
chr20	32044473	32045439
chr20	34458039	34458658
chr20	35473475	35474203
chr20	35481072	35481653
chr20	35975878	35976204
chr20	36418402	36418675
chr20	36652180	36653300
chr20	36689249	36689479
chr20	36715212	36715319
chr20	38729280	38730429
chr20	41989357	41989964
chr20	42250366	42250779
chr20	42466927	42467246
chr20	44279638	44280029
chr20	44851190	44851661
chr20	45863381	45863685
chr20	46072795	46073587
chr20	46447533	46448206
chr20	46942059	46942585
chr20	48416270	48416388
chr20	55040431	55040823
chr20	55668626	55669117
chr20	55983207	55983697
chr20	56631727	56632329
chr20	56696838	56697316
chr20	56703286	56703967
chr20	56838343	56839023
chr20	57349453	57350635
chr20	57404858	57405761
chr20	57694809	57695373
chr20	58658660	58659007
chr20	58791073	58792118
chr20	59313099	59313864
chr20	59320370	59320942
chr20	59383584	59384138
chr20	59395341	59396220
chr20	59453214	59453546
chr20	59499741	59500998
chr20	59554258	59555147
chr20	59700356	59700897
chr20	59763643	59764067
chr20	59848220	59848449
chr20	59866665	59867123
chr20	60238249	60238456
chr20	60310217	60310570
chr20	60390442	60390596
chr20	60406180	60406974
chr20	60509086	60510054
chr20	60592543	60593218
chr20	61073006	61074628
chr20	61633790	61634312
chr20	61948612	61949421
chr20	62198335	62198857
chr20	62255152	62255916
chr21	14392034	14392854
chr21	17049339	17049622
chr21	22526700	22526989
chr21	26782295	26782906
chr21	29507674	29509095
chr21	32801990	32802304
chr21	34279145	34280054
chr21	35137141	35138003
chr21	35287234	35288327
chr21	36834034	36834409
chr21	37908431	37908708
chr21	38055496	38056144
chr21	38650140	38650700
chr21	38916841	38917171
chr21	39207414	39207688
chr21	39306568	39307253
chr21	39428114	39428721
chr21	39804820	39805232
chr21	40213350	40213788
chr21	40214001	40214390
chr21	40279544	40279737
chr21	40431544	40433011
chr21	40442765	40442994
chr21	40956731	40957306
chr21	40980046	40980366
chr21	41145582	41145966
chr21	41286318	41286859
chr21	41306425	41306582
chr21	41306776	41307077
chr21	41360653	41360978
chr21	41384977	41385395
chr21	41443919	41444924
chr21	41631315	41631809
chr21	41965760	41966198
chr21	42070709	42071086
chr21	42123680	42124011
chr21	42248148	42248775
chr21	42320280	42320531
chr21	42454513	42455064
chr21	42477043	42477266
chr21	42585691	42586185
chr21	42703772	42705183
chr21	42732651	42733272
chr21	42804556	42804783
chr21	42909226	42909552
chr21	42930312	42930685
chr21	42955832	42956313
chr21	42963056	42963635
chr21	43052287	43053179
chr21	43453111	43453437
chr21	43466834	43467076
chr21	43473484	43474048
chr21	43486175	43486497
chr21	43581053	43581569
chr21	43586534	43587064
chr21	43612788	43613473
chr21	43628859	43629656
chr21	43712182	43713427
chr21	43744287	43744625
chr21	43849102	43849606
chr21	43876680	43876939
chr21	44202179	44203190
chr21	44218099	44219136
chr21	44648352	44648820
chr21	44663829	44664503
chr21	45055155	45055689
chr21	45110867	45111216
chr21	45148811	45149440
chr21	45155491	45155751
chr21	45164455	45164801
chr21	45286485	45286905
chr21	45400242	45400703
chr21	45452836	45453165
chr21	45576594	45577259
chr21	45597722	45598586
chr21	45718545	45719084
chr21	45720635	45721409
chr21	45723516	45723740
chr21	45773667	45775029
chr21	45835334	45836152
chr21	45879237	45879617
chr21	46225003	46225260
chr21	46229263	46229570
chr21	46323976	46324401
chr22	18276889	18277244
chr22	18310727	18310990
chr22	18618197	18618512
chr22	18618754	18620006
chr22	22737353	22737903
chr22	25053109	25053488
chr22	25628676	25628969
chr22	26044454	26044765
chr22	34068948	34069594
chr22	34611643	34611888
chr22	35406067	35406592
chr22	35550935	35551333
chr22	35837295	35837733
chr22	37487829	37488113
chr22	38125358	38125837
chr22	38289900	38290239
chr22	38349330	38349742
chr22	41049736	41050099
chr22	42881481	42882649
chr22	42996461	42996686
chr22	43110253	43110912
chr22	43378978	43379405
chr22	43391988	43392264
chr22	44065483	44066230
chr22	44753729	44754419
chr22	46584520	46584804
chr22	47106579	47106875
chr22	47112216	47112547
chr22	47317140	47317485
chr22	47367075	47368647
chr22	47387682	47387916
chr22	47415574	47415976
chr22	47654290	47654643
chr22	47663322	47663806
chr22	47738285	47738631
chr22	47766753	47767651
chr22	47855322	47855971
chr22	48105151	48105798
chr22	48179260	48179850
chr22	48228569	48229367
chr22	48237724	48238480
chr22	48359859	48360229
chr22	49414158	49414435
chr2	517203	517654
chr2	594839	595940
chr2	730722	730822
chr2	737733	738498
chr2	864136	864432
chr2	1140402	1141331
chr2	1237632	1238334
chr2	1263849	1264468
chr2	1289107	1290351
chr2	1530449	1531062
chr2	1579038	1579807
chr2	1586570	1587055
chr2	1638752	1638963
chr2	1661639	1662203
chr2	1832778	1833172
chr2	2278329	2278576
chr2	2555777	2555976
chr2	2626956	2627333
chr2	2710525	2711069
chr2	2733179	2733580
chr2	2830852	2831301
chr2	2834827	2835762
chr2	2992127	2992411
chr2	3028928	3029518
chr2	3093226	3093477
chr2	3120934	3121628
chr2	3485978	3486224
chr2	3997182	3997359
chr2	4177433	4177794
chr2	4443060	4443337
chr2	4705064	4705383
chr2	4788180	4788559
chr2	4949500	4950097
chr2	5190881	5191285
chr2	5502304	5502913
chr2	5567560	5567759
chr2	5620392	5620751
chr2	6204428	6205268
chr2	6449928	6450393
chr2	6817128	6817868
chr2	6826901	6827752
chr2	6839270	6839759
chr2	7095691	7097287
chr2	7154909	7155238
chr2	7245942	7247498
chr2	7825544	7825964
chr2	8077033	8077334
chr2	8191546	8191799
chr2	8447405	8447683
chr2	8455785	8455985
chr2	8633599	8634086
chr2	8654600	8654824
chr2	8684243	8684811
chr2	9375019	9375455
chr2	9438894	9439194
chr2	10247387	10247859
chr2	10290786	10291981
chr2	10370093	10370353
chr2	10402493	10402857
chr2	10491131	10491401
chr2	10575843	10576093
chr2	11846600	11847311
chr2	12219857	12220397
chr2	12383908	12384307
chr2	16043504	16043773
chr2	16171186	16171526
chr2	16440026	16440386
chr2	16730234	16730524
chr2	18287641	18287900
chr2	18955834	18956456
chr2	19847322	19847514
chr2	20228526	20228715
chr2	20281675	20282238
chr2	23279738	23280309
chr2	23498683	23499373
chr2	23821447	23821729
chr2	25001679	25001983
chr2	25493092	25493360
chr2	26558890	26559170
chr2	27157368	27157757
chr2	27211088	27211420
chr2	29082536	29082959
chr2	29293460	29293868
chr2	29847146	29847437
chr2	29952760	29953053
chr2	30203458	30203710
chr2	30299287	30299750
chr2	30408186	30408547
chr2	32994668	32995283
chr2	33846020	33846278
chr2	42071249	42071800
chr2	43230368	43230958
chr2	45731571	45731856
chr2	46959212	46959567
chr2	49310390	49310488
chr2	51434777	51435135
chr2	58989452	58989723
chr2	59238393	59238911
chr2	60612861	60613146
chr2	62811379	62811629
chr2	65068351	65068837
chr2	65828622	65828825
chr2	66505781	66506034
chr2	66956754	66957100
chr2	67294228	67294917
chr2	67752423	67752986
chr2	71651197	71652295
chr2	71657765	71658077
chr2	71699051	71699543
chr2	71742773	71743934
chr2	71913710	71914462
chr2	84910421	84910672
chr2	85823173	85823532
chr2	86121726	86122204
chr2	86498568	86498942
chr2	86995561	86995993
chr2	87477167	87477662
chr2	87485825	87486061
chr2	87495330	87495586
chr2	87499436	87499829
chr2	87509898	87510170
chr2	88277076	88277686
chr2	88333720	88333888
chr2	91054921	91055191
chr2	91627018	91627309
chr2	94782849	94783585
chr2	94838674	94838911
chr2	95024078	95024482
chr2	95354971	95355360
chr2	96094235	96094713
chr2	96561586	96561961
chr2	96831267	96831829
chr2	98448664	98449060
chr2	99998679	99998945
chr2	100229417	100229712
chr2	104807419	104807681
chr2	104861682	104862115
chr2	105672141	105672830
chr2	105919440	105920184
chr2	106707224	106707706
chr2	107116228	107116660
chr2	108920155	108920762
chr2	109248732	109249342
chr2	109449611	109449945
chr2	112528979	112529210
chr2	114077034	114077303
chr2	120167764	120168675
chr2	120752078	120752192
chr2	120846799	120847385
chr2	120954540	120955289
chr2	121154453	121154665
chr2	121251023	121251509
chr2	121397555	121398195
chr2	121547335	121547635
chr2	121607937	121608789
chr2	121952681	121953191
chr2	123333099	123333916
chr2	123907759	123908195
chr2	124991049	124991370
chr2	125205611	125206050
chr2	126647812	126648134
chr2	127151501	127151761
chr2	127353320	127353820
chr2	127518258	127518636
chr2	127929673	127929925
chr2	129266067	129266664
chr2	129540981	129541495
chr2	130208946	130209588
chr2	130233690	130233877
chr2	130618131	130618267
chr2	130619015	130619345
chr2	131451035	131452203
chr2	131459675	131460588
chr2	132732845	132732948
chr2	132744721	132745070
chr2	133972401	133972500
chr2	134001992	134002234
chr2	134254570	134255164
chr2	137407023	137407305
chr2	137918577	137919210
chr2	139285705	139285962
chr2	141798034	141798342
chr2	142075479	142076044
chr2	143696578	143696867
chr2	144989652	144989937
chr2	145521354	145521956
chr2	146308982	146309297
chr2	147739068	147739482
chr2	149498756	149499085
chr2	156900345	156900669
chr2	161843571	161843959
chr2	163313660	163313810
chr2	166692763	166692904
chr2	167323765	167323943
chr2	172236613	172237215
chr2	174270496	174271468
chr2	175741222	175741764
chr2	176709018	176709290
chr2	176731433	176731717
chr2	177229410	177229514
chr2	177348454	177348760
chr2	177922084	177922817
chr2	177924198	177924457
chr2	178376148	178376617
chr2	180346917	180347290
chr2	181244127	181244485
chr2	183485701	183485992
chr2	193477132	193477834
chr2	197644882	197645249
chr2	197651805	197652133
chr2	200637809	200638324
chr2	200781648	200782032
chr2	201844837	201845268
chr2	206248940	206249223
chr2	206270018	206270458
chr2	207706847	207707437
chr2	216110779	216111215
chr2	216494303	216494868
chr2	216671862	216672391
chr2	216884774	216885872
chr2	217110595	217111058
chr2	217265296	217265446
chr2	217269121	217269400
chr2	217381876	217382512
chr2	217641455	217642268
chr2	217816370	217816668
chr2	218085622	218085883
chr2	218368134	218368332
chr2	218378251	218379138
chr2	218423957	218424199
chr2	218431516	218431837
chr2	218562523	218564088
chr2	218587580	218588076
chr2	218603598	218604196
chr2	218655549	218656133
chr2	220108184	220108731
chr2	220144835	220145115
chr2	220210047	220210530
chr2	220685919	220686269
chr2	220910995	220911287
chr2	221235978	221236472
chr2	221620523	221621245
chr2	222144092	222144328
chr2	222660888	222661111
chr2	222872125	222872419
chr2	222878355	222878631
chr2	223544664	223544971
chr2	225158203	225158478
chr2	225199648	225199904
chr2	225491382	225492392
chr2	227288264	227289025
chr2	228512319	228512608
chr2	230305838	230306198
chr2	231441288	231441583
chr2	233186385	233187561
chr2	233608816	233609463
chr2	233738142	233738869
chr2	235087200	235088216
chr2	235151504	235152212
chr2	235256063	235256800
chr2	235475404	235476048
chr2	235543168	235543642
chr2	235652186	235652449
chr2	235919220	235919587
chr2	236085090	236085406
chr2	236376353	236376709
chr2	236571412	236572989
chr2	237139921	237140301
chr2	237142962	237143287
chr2	237148892	237149142
chr2	237167233	237167930
chr2	237280059	237280505
chr2	237785656	237787503
chr2	238037995	238038655
chr2	238138524	238139135
chr2	238698717	238700839
chr2	239059600	239059826
chr2	239075289	239075969
chr2	239094583	239094892
chr2	239287082	239287545
chr2	239498172	239498675
chr2	239671488	239671799
chr2	239736638	239737253
chr2	239933392	239933933
chr2	239958009	239958283
chr2	240054068	240054863
chr2	240229104	240229829
chr2	240302489	240303046
chr2	240324744	240325520
chr2	240502077	240502406
chr2	240735418	240736029
chr2	240752135	240752621
chr2	240896334	240898189
chr2	241108580	241109203
chr2	241550043	241550326
chr2	242105452	242105985
chr2	242134390	242134780
chr2	242381754	242382038
chr2	242413839	242414279
chr2	242451851	242452387
chr2	242454907	242455315
chr2	242472322	242472629
chr2	242501968	242502338
chr2	242536586	242537056
chr2	242538996	242539323
chr2	242585655	242586009
chr2	242655085	242655745
chr3	10382228	10382783
chr3	13216561	13216874
chr3	13699218	13700291
chr3	14271563	14271808
chr3	16523956	16524468
chr3	21174661	21175170
chr3	25483798	25484062
chr3	30749929	30750331
chr3	46924490	46925032
chr3	54726364	54727338
chr3	56032658	56033062
chr3	72468790	72469693
chr3	72665985	72666266
chr3	77679694	77680245
chr3	124353542	124353821
chr3	127703450	127703839
chr3	127740741	127741800
chr3	127757957	127758793
chr3	128356087	128356405
chr3	128356793	128357218
chr3	129625722	129626314
chr3	130570919	130573537
chr3	131245654	131245942
chr3	133464446	133464963
chr3	134083533	134084039
chr3	183317202	183318032
chr3	185614652	185615546
chr3	190701237	190701962
chr3	191580329	191580728
chr3	196312708	196312808
chr4	189748	190009
chr4	538312	539492
chr4	1026037	1026428
chr4	1484958	1485505
chr4	1507498	1508219
chr4	1544617	1545162
chr4	1592000	1592567
chr4	1624101	1624453
chr4	3200926	3201386
chr4	3334507	3334754
chr4	3339671	3340142
chr4	3440580	3440843
chr4	3539429	3539839
chr4	3560509	3560817
chr4	3565454	3565641
chr4	3632185	3632509
chr4	3634391	3635312
chr4	3639304	3639676
chr4	3685551	3687004
chr4	3778399	3778665
chr4	3833196	3833718
chr4	3882470	3882833
chr4	4823197	4823519
chr4	4845812	4846121
chr4	4890184	4890536
chr4	4920284	4920793
chr4	5514786	5515094
chr4	5723085	5724013
chr4	5908894	5909236
chr4	6056481	6056685
chr4	6178533	6178762
chr4	6223489	6224442
chr4	6286823	6287187
chr4	6351937	6352756
chr4	6564162	6564552
chr4	6586461	6587657
chr4	6778057	6778682
chr4	7080590	7080928
chr4	7183688	7183952
chr4	7415799	7416154
chr4	7438453	7438948
chr4	7440483	7440833
chr4	7457021	7457493
chr4	7521787	7522021
chr4	7546506	7546767
chr4	7618520	7619118
chr4	7673842	7674373
chr4	7692745	7693319
chr4	7742042	7742899
chr4	7776559	7777210
chr4	7838150	7838447
chr4	8029194	8029651
chr4	8118931	8119204
chr4	8122433	8123096
chr4	8233009	8233963
chr4	8286092	8286749
chr4	8316435	8316848
chr4	8374142	8374388
chr4	8739183	8740200
chr4	9356588	9356850
chr4	9591538	9592237
chr4	12749022	12749797
chr4	12806701	12807178
chr4	13649778	13650129
chr4	14252630	14252902
chr4	14591994	14592198
chr4	15106442	15107438
chr4	15313572	15313837
chr4	15350120	15350384
chr4	15551122	15551408
chr4	15913529	15914669
chr4	15993375	15993654
chr4	16704704	16705276
chr4	20042571	20042853
chr4	21732648	21732969
chr4	23406330	23406553
chr4	23411752	23412299
chr4	24771103	24771417
chr4	27561746	27562000
chr4	28131559	28131836
chr4	30327388	30327747
chr4	30627375	30627891
chr4	33698092	33698344
chr4	34714123	34715008
chr4	36109285	36109520
chr4	37921735	37922140
chr4	38411629	38412642
chr4	38431161	38431929
chr4	39490703	39490968
chr4	39873182	39873722
chr4	41043060	41043570
chr4	46644076	46644726
chr4	47468922	47469334
chr4	48853273	48853985
chr4	49009462	49009758
chr4	49018082	49018352
chr4	49207032	49207156
chr4	52760415	52760732
chr4	53573640	53573910
chr4	57987690	57987947
chr4	60296836	60297048
chr4	61610089	61610538
chr4	61886591	61886854
chr4	61894497	61894761
chr4	62053335	62053824
chr4	66246873	66247125
chr4	73125358	73126472
chr4	77338892	77339164
chr4	80493519	80493617
chr4	81347917	81348383
chr4	82643931	82644664
chr4	84865431	84866038
chr4	85086365	85086596
chr4	85503489	85503912
chr4	104256678	104257018
chr4	108306716	108306972
chr4	109537672	109538248
chr4	110356668	110357122
chr4	111373968	111375048
chr4	112070181	112070475
chr4	114539363	114539615
chr4	116121398	116122026
chr4	116427834	116428288
chr4	120943437	120943787
chr4	121586641	121586907
chr4	122244178	122244424
chr4	122647007	122647504
chr4	125570175	125570509
chr4	126455535	126455810
chr4	134777951	134778205
chr4	136272711	136272951
chr4	140007412	140008366
chr4	141074608	141075104
chr4	141903195	141903578
chr4	142273921	142274193
chr4	147079473	147079722
chr4	154167434	154167745
chr4	157826671	157826923
chr4	164356689	164357057
chr4	166807454	166808051
chr4	169836624	169836951
chr4	174112047	174112294
chr4	174574456	174575027
chr4	175278288	175278557
chr4	181723292	181723456
chr4	183968294	183969044
chr4	183971307	183972024
chr4	185450562	185450726
chr4	185513354	185513650
chr4	186985036	186985646
chr4	187287211	187287520
chr4	187318363	187319301
chr4	187455871	187456116
chr4	187564032	187564280
chr4	188035114	188035982
chr4	189389530	189390066
chr4	190431051	190431643
chr4	190520477	190520973
chr4	190663310	190663978
chr4	191062669	191062767
chr4	191107846	191108780
chr4	191235752	191236171
chr5	397515	398098
chr5	909155	909516
chr5	1036534	1036910
chr5	1251610	1251836
chr5	1614964	1615342
chr5	1982293	1982598
chr5	2013703	2014477
chr5	2507922	2508203
chr5	2578935	2579630
chr5	2584937	2585780
chr5	2647811	2648326
chr5	2722155	2722397
chr5	2942032	2942437
chr5	3376615	3376967
chr5	4473073	4473615
chr5	5357754	5358790
chr5	6501444	6501810
chr5	6838375	6839110
chr5	8261270	8261483
chr5	8667916	8668666
chr5	11235215	11235434
chr5	11293052	11293415
chr5	33707416	33708494
chr5	46306336	46306480
chr5	54054733	54055003
chr5	73107295	73107689
chr5	73392600	73393069
chr5	83743026	83743621
chr5	108974153	108974527
chr5	114989487	114990088
chr5	126989836	126990030
chr5	132830628	132831121
chr5	133063586	133064160
chr5	142994846	142995232
chr5	149014486	149014877
chr5	149622943	149623491
chr5	159864270	159864637
chr5	165889826	165890237
chr5	166859160	166859906
chr5	168105864	168106987
chr5	169909930	169910457
chr5	169911057	169911856
chr5	171956876	171957261
chr5	175951369	175951676
chr5	176211775	176212051
chr5	177717152	177717768
chr6	291293	291577
chr6	1014187	1014624
chr6	1348205	1348816
chr6	1423595	1424218
chr6	1532516	1532662
chr6	1683055	1683634
chr6	2321161	2321925
chr6	2436436	2436839
chr6	2591241	2591686
chr6	2611003	2611323
chr6	2999376	2999672
chr6	3248213	3248657
chr6	3297369	3297843
chr6	3721794	3722527
chr6	6692156	6692651
chr6	6767174	6767417
chr6	6877728	6878289
chr6	8268087	8268517
chr6	10160868	10161271
chr6	10696660	10697405
chr6	11427457	11428321
chr6	11535279	11536004
chr6	11599794	11600176
chr6	13699158	13699455
chr6	14310350	14310606
chr6	14490879	14491434
chr6	15216452	15216797
chr6	19578618	19579283
chr6	23014433	23014856
chr6	25035259	25036066
chr6	33820123	33820420
chr6	33844307	33845062
chr6	34120368	34120914
chr6	34147543	34150180
chr6	37096446	37096945
chr6	37279664	37280229
chr6	39453880	39454411
chr6	39920858	39921060
chr6	40425126	40427031
chr6	40730512	40731084
chr6	40852283	40852821
chr6	41529361	41530047
chr6	41564981	41565350
chr6	41570202	41570505
chr6	43368765	43370614
chr6	43813804	43813912
chr6	43829524	43829924
chr6	43946377	43946619
chr6	44013844	44014119
chr6	44120046	44120556
chr6	44257019	44257300
chr6	44594292	44594863
chr6	44701683	44702309
chr6	45629329	45630226
chr6	49148541	49148747
chr6	52088298	52088655
chr6	55015750	55016476
chr6	56451466	56452050
chr6	58395506	58395940
chr6	62481833	62482406
chr6	65108531	65108766
chr6	65710031	65710415
chr6	68014692	68015007
chr6	73816325	73816564
chr6	81639200	81639349
chr6	83455949	83456224
chr6	83746647	83746934
chr6	90986126	90986353
chr6	91910693	91911032
chr6	96660662	96660973
chr6	102526888	102527255
chr6	106566239	106566677
chr6	110723524	110723903
chr6	117877691	117877994
chr6	118640259	118640794
chr6	119600252	119600523
chr6	121296428	121297185
chr6	123586387	123586671
chr6	125141756	125142154
chr6	130249271	130250047
chr6	131028084	131028395
chr6	131487637	131488021
chr6	131746370	131746786
chr6	137479886	137480379
chr6	140234093	140234357
chr6	140408190	140408528
chr6	140649553	140649806
chr6	150297593	150297939
chr6	150572692	150573010
chr6	155992374	155992921
chr6	156105315	156105703
chr6	159193869	159194479
chr6	159945470	159946023
chr6	160876488	160876872
chr6	161009405	161009942
chr6	161090197	161091201
chr6	161535318	161535921
chr6	161715370	161716004
chr6	162920317	162921025
chr6	163216033	163216583
chr6	163697516	163698458
chr6	164006194	164007192
chr6	165259569	165260155
chr6	166011673	166011878
chr6	166082506	166083142
chr6	166127131	166128246
chr6	166421289	166421706
chr6	166840771	166841069
chr6	166960690	166961306
chr6	166981035	166982081
chr6	167158199	167158473
chr6	167670995	167672196
chr6	167794839	167796019
chr6	168262817	168263812
chr6	168413221	168414250
chr6	168572851	168573300
chr6	168661642	168663225
chr6	168741770	168742034
chr6	168766898	168767717
chr6	169425733	169426358
chr6	169513638	169513946
chr6	169523786	169524238
chr6	169909316	169909913
chr6	170005884	170006147
chr6	170263616	170263895
chr6	170340676	170341333
chr7	179982	180605
chr7	186047	186440
chr7	284580	284923
chr7	303176	303809
chr7	572019	572768
chr7	1016974	1018065
chr7	1314959	1316136
chr7	1585923	1586178
chr7	1624705	1625177
chr7	2048104	2048392
chr7	2108065	2108766
chr7	2856561	2857320
chr7	5437939	5438199
chr7	6185876	6186180
chr7	6895141	6895641
chr7	8158493	8158965
chr7	13926347	13926781
chr7	18792717	18793157
chr7	22126827	22127251
chr7	25862973	25863427
chr7	26645607	26646461
chr7	26648236	26649243
chr7	27373954	27374997
chr7	29380756	29381077
chr7	29729697	29729949
chr7	30182139	30182380
chr7	31083673	31084324
chr7	34053781	34054050
chr7	36158812	36159398
chr7	36521979	36522450
chr7	39265720	39266846
chr7	43204549	43205067
chr7	44190951	44191375
chr7	45944056	45944474
chr7	47368770	47369712
chr7	47480052	47480641
chr7	47952367	47952925
chr7	50818426	50818937
chr7	50887462	50887992
chr7	51397782	51398244
chr7	51512083	51512541
chr7	51811659	51812060
chr7	54236867	54237156
chr7	55102929	55103197
chr7	55130645	55131517
chr7	55239252	55239651
chr7	57310322	57310914
chr7	57892397	57892889
chr7	66023044	66023588
chr7	67839321	67839743
chr7	69457781	69458179
chr7	71516035	71516388
chr7	71725469	71725878
chr7	72480025	72480867
chr7	72778358	72778706
chr7	76464628	76464993
chr7	84545429	84545807
chr7	84592882	84593221
chr7	91890846	91891255
chr7	94671494	94672391
chr7	98246906	98247261
chr7	98252622	98253381
chr7	99914684	99914997
chr7	100016241	100016498
chr7	102809365	102809734
chr7	104360945	104361146
chr7	105528923	105529178
chr7	107953980	107954268
chr7	113513445	113513714
chr7	113842112	113842340
chr7	117398939	117399584
chr7	117806146	117806686
chr7	121730567	121731119
chr7	122398196	122398538
chr7	123461514	123461849
chr7	126686242	126687169
chr7	128313974	128316423
chr7	129578686	129579084
chr7	130922149	130922462
chr7	130989130	130990709
chr7	131982068	131982430
chr7	135050138	135050429
chr7	135731118	135731469
chr7	136260932	136261132
chr7	140429574	140429962
chr7	141083944	141084215
[truncated: 220,168+ more rows]
